# Supplementary material for: 5-Aza-4’-thio-2’-deoxycytidine induces C&gt;G transversions in a specific trinucleotide context and leads to acute lymphoid leukemia
Source: Research Square preprint supplement (doi:10.21203/rs.3.rs-3186246/v1), 2023-12-19
Supplement: Supplementary file 1 [file 134538e159bb2a9735deb757.xlsx]

## Sheet: 11th Experiment Whole Exome Seq
SampleName	Chr	Start	End	REF	ALT	Gene_Name	HGVS.c	HGVS.p	Annotation	Annotation_Impact	DP_NORMAL	AD_NORMAL.2	AF_NORMAL	DP_TUMOR	AD_TUMOR.2	AF_TUMOR	LOG_FISHER
Aplan-11-3656-Thy_vs_Aplan-11-3656-Tail	chr1	40297890	40297890	G	C	Il1r1	c.665-19G>C		intron_variant	MODIFIER	47	0	0.026	37	14	0.37	5.71574
Aplan-11-3656-Thy_vs_Aplan-11-3656-Tail	chr1	52123248	52123248	G	C	Stat1	c.263G>C	p.Arg88Pro	missense_variant	MODERATE	53	0	0.023	58	32	0.521	6.12508
Aplan-11-3656-Thy_vs_Aplan-11-3656-Tail	chr1	71641183	71641183	G	C	Fn1	c.1362C>G	p.Ala454Ala	synonymous_variant	LOW	71	0	0.016	56	26	0.456	6.01371
Aplan-11-3656-Thy_vs_Aplan-11-3656-Tail	chr1	75239575	75239575	C	G	Dnajb2	c.297C>G	p.Pro99Pro	synonymous_variant	LOW	51	0	0.022	52	28	0.546	5.90156
Aplan-11-3656-Thy_vs_Aplan-11-3656-Tail	chr1	75427651	75427651	C	G	Speg	c.8199C>G	p.Asp2733Glu	missense_variant	MODERATE	53	0	0.021	52	15	0.318	5.09414
Aplan-11-3656-Thy_vs_Aplan-11-3656-Tail	chr1	75427694	75427694	C	G	Speg	c.8242C>G	p.Arg2748Gly	missense_variant	MODERATE	68	0	0.019	59	18	0.31	6.70183
Aplan-11-3656-Thy_vs_Aplan-11-3656-Tail	chr1	87211320	87211320	C	G	Chrng	c.1392C>G	p.Asn464Lys	missense_variant	MODERATE	63	0	0.018	54	19	0.362	7.27533
Aplan-11-3656-Thy_vs_Aplan-11-3656-Tail	chr1	87789607	87789607	G	C	Atg16l1	c.1664G>C	p.Arg555Pro	missense_variant	MODERATE	70	0	0.017	62	42	0.635	6.15227
Aplan-11-3656-Thy_vs_Aplan-11-3656-Tail	chr1	91412193	91412193	G	C	Hes6	c.540C>G	p.Asp180Glu	missense_variant	MODERATE	44	0	0.026	25	11	0.44	5.6119
Aplan-11-3656-Thy_vs_Aplan-11-3656-Tail	chr1	91429485	91429485	G	C	Per2	c.1955C>G	p.Thr652Arg	missense_variant	MODERATE	24	0	0.048	43	23	0.529	5.68524
Aplan-11-3656-Thy_vs_Aplan-11-3656-Tail	chr1	93144553	93144553	G	C	Agxt	c.1051G>C	p.Gly351Arg	missense_variant	MODERATE	23	0	0.05	20	8	0.444	3.06113
Aplan-11-3656-Thy_vs_Aplan-11-3656-Tail	chr1	93390400	93390400	G	C	Ano7	c.833G>C	p.Arg278Pro	missense_variant	MODERATE	54	0	0.023	26	10	0.429	5.49132
Aplan-11-3656-Thy_vs_Aplan-11-3656-Tail	chr1	135371990	135371990	G	C	Shisa4	c.554C>G	p.Pro185Arg	missense_variant	MODERATE	47	0	0.026	46	23	0.49	6.53991
Aplan-11-3656-Thy_vs_Aplan-11-3656-Tail	chr1	153433310	153433310	G	C	Shcbp1l	c.649G>C	p.Ala217Pro	missense_variant	MODERATE	79	0	0.015	82	27	0.34	6.02037
Aplan-11-3656-Thy_vs_Aplan-11-3656-Tail	chr1	155929098	155929098	G	C	Cep350	c.2238C>G	p.Pro746Pro	synonymous_variant	LOW	86	0	0.015	74	33	0.46	6.03661
Aplan-11-3656-Thy_vs_Aplan-11-3656-Tail	chr1	156288208	156288208	G	C	Tdrd5	c.1114+20C>G		intron_variant	MODIFIER	54	0	0.023	45	17	0.359	6.69931
Aplan-11-3656-Thy_vs_Aplan-11-3656-Tail	chr1	156302398	156302398	G	C	Tdrd5	c.201C>G	p.Cys67Trp	missense_variant	MODERATE	77	1	0.03	64	26	0.424	6.29373
Aplan-11-3656-Thy_vs_Aplan-11-3656-Tail	chr1	156310831	156310831	G	C	Nphs2	c.44G>C	p.Arg15Thr	missense_variant	MODERATE	21	0	0.046	20	8	0.421	2.87996
Aplan-11-3656-Thy_vs_Aplan-11-3656-Tail	chr1	166205852	166205852	C	G	Mael	c.908+1G>C		splice_donor_variant&intron_variant	HIGH	102	0	0.012	111	40	0.353	5.99662
Aplan-11-3656-Thy_vs_Aplan-11-3656-Tail	chr1	171384683	171384683	G	C	Nectin4	c.849-1G>C		splice_acceptor_variant&intron_variant	HIGH	28	0	0.039	23	5	0.3	1.84392
Aplan-11-3656-Thy_vs_Aplan-11-3656-Tail	chr1	171386647	171386647	G	C	Nectin4	c.1369G>C	p.Glu457Gln	missense_variant	MODERATE	39	0	0.031	29	12	0.444	5.14712
Aplan-11-3656-Thy_vs_Aplan-11-3656-Tail	chr2	26460045	26460045	C	CAAAGTAGATT	Notch1	c.7081_7082insAATCTACTTT	p.Arg2361fs	frameshift_variant	HIGH	26	0	0.039	50	17	0.354	3.48745
Aplan-11-3656-Thy_vs_Aplan-11-3656-Tail	chr2	29890997	29890997	C	G	Odf2	c.-138+1076C>G		intron_variant	MODIFIER	54	0	0.023	48	22	0.459	6.77362
Aplan-11-3656-Thy_vs_Aplan-11-3656-Tail	chr2	30084650	30084650	G	C	Pkn3	c.1216-41G>C		intron_variant	MODIFIER	82	0	0.016	53	13	0.282	5.71601
Aplan-11-3656-Thy_vs_Aplan-11-3656-Tail	chr2	30149690	30149690	C	G	Tbc1d13	c.1138-10C>G		intron_variant	MODIFIER	69	0	0.019	72	27	0.383	6.14672
Aplan-11-3656-Thy_vs_Aplan-11-3656-Tail	chr2	31452875	31452875	G	C	Ncs1-Ass1	n.31452875G>C		intergenic_region	MODIFIER	37	0	0.031	40	15	0.387	4.85213
Aplan-11-3656-Thy_vs_Aplan-11-3656-Tail	chr2	32250502	32250502	C	G	Pomt1	c.1371C>G	p.Thr457Thr	synonymous_variant	LOW	97	0	0.013	99	44	0.474	6.04003
Aplan-11-3656-Thy_vs_Aplan-11-3656-Tail	chr2	32250574	32250574	C	G	Uck1	c.*5456G>C		downstream_gene_variant	MODIFIER	85	0	0.014	81	37	0.453	5.84979
Aplan-11-3656-Thy_vs_Aplan-11-3656-Tail	chr2	33644127	33644127	G	C	Lmx1b	c.-3616C>G		upstream_gene_variant	MODIFIER	42	0	0.026	36	12	0.355	4.54031
Aplan-11-3656-Thy_vs_Aplan-11-3656-Tail	chr2	52255558	52255558	G	C	Neb	c.8953C>G	p.Arg2985Gly	missense_variant	MODERATE	340	0	0.003752	295	95	0.342	5.68668
Aplan-11-3656-Thy_vs_Aplan-11-3656-Tail	chr2	53126897	53126897	G	C	Fmnl2	c.3087G>C	p.Ala1029Ala	synonymous_variant	LOW	106	0	0.011	87	29	0.373	5.94836
Aplan-11-3656-Thy_vs_Aplan-11-3656-Tail	chr2	76006002	76006002	G	C	Pde11a	c.2646+11834C>G		intron_variant	MODIFIER	154	0	0.008595	88	21	0.279	6.92316
Aplan-11-3656-Thy_vs_Aplan-11-3656-Tail	chr2	76827446	76827446	G	C	Ttn	c.32467+37C>G		intron_variant	MODIFIER	195	0	0.006475	146	66	0.439	5.80979
Aplan-11-3656-Thy_vs_Aplan-11-3656-Tail	chr2	84694583	84694583	G	C	Zdhhc5	c.544C>G	p.Arg182Gly	missense_variant	MODERATE	34	0	0.031	41	20	0.47	6.36496
Aplan-11-3656-Thy_vs_Aplan-11-3656-Tail	chr2	85196006	85196006	G	C	Lrrc55	c.673C>G	p.Arg225Gly	missense_variant	MODERATE	36	0	0.033	18	8	0.471	4.37617
Aplan-11-3656-Thy_vs_Aplan-11-3656-Tail	chr2	85647564	85647564	G	C	Olfr1002	c.756C>G	p.Tyr252*	stop_gained	HIGH	201	1	0.005944	218	89	0.431	5.83993
Aplan-11-3656-Thy_vs_Aplan-11-3656-Tail	chr2	111194183	111194183	C	T	4930430A15Rik	c.1360G>A	p.Ala454Thr	missense_variant	MODERATE	206	0	0.005933	178	47	0.271	6.28908
Aplan-11-3656-Thy_vs_Aplan-11-3656-Tail	chr2	118920219	118920219	G	C	Bahd1	c.1814G>C	p.Arg605Pro	missense_variant	MODERATE	63	0	0.019	43	12	0.278	5.15679
Aplan-11-3656-Thy_vs_Aplan-11-3656-Tail	chr2	120877040	120877040	G	T	Ubr1	c.4400C>A	p.Pro1467Gln	missense_variant	MODERATE	55	0	0.021	59	14	0.26	4.24823
Aplan-11-3656-Thy_vs_Aplan-11-3656-Tail	chr2	120877042	120877042	C	A	Ubr1	c.4398G>T	p.Pro1466Pro	synonymous_variant	LOW	55	0	0.021	59	14	0.26	4.24823
Aplan-11-3656-Thy_vs_Aplan-11-3656-Tail	chr2	136550057	136550057	G	C	Ankef1	c.1165G>C	p.Gly389Arg	missense_variant	MODERATE	82	0	0.014	56	28	0.5	6.14926
Aplan-11-3656-Thy_vs_Aplan-11-3656-Tail	chr2	162253847	162253847	C	G	Ptprt	c.602G>C	p.Arg201Pro	missense_variant	MODERATE	67	0	0.018	56	27	0.488	6.47487
Aplan-11-3656-Thy_vs_Aplan-11-3656-Tail	chr2	163446100	163446100	G	C	Gdap1l1	c.247G>C	p.Glu83Gln	missense_variant	MODERATE	62	0	0.019	34	16	0.517	6.75182
Aplan-11-3656-Thy_vs_Aplan-11-3656-Tail	chr2	163732248	163732248	G	C	Ada	c.478+9C>G		intron_variant	MODIFIER	55	0	0.024	34	15	0.452	7.31307
Aplan-11-3656-Thy_vs_Aplan-11-3656-Tail	chr2	166082710	166082710	G	C	Sulf2	c.1554C>G	p.Gly518Gly	synonymous_variant	LOW	23	0	0.053	25	6	0.261	1.64478
Aplan-11-3656-Thy_vs_Aplan-11-3656-Tail	chr2	172249169	172249169	G	C	Mc3r	c.310G>C	p.Asp104His	missense_variant	MODERATE	120	0	0.009728	91	34	0.347	6.15418
Aplan-11-3656-Thy_vs_Aplan-11-3656-Tail	chr2	181234184	181234184	G	C	Helz2	c.4516C>G	p.Arg1506Gly	missense_variant	MODERATE	63	0	0.017	65	19	0.284	6.07548
Aplan-11-3656-Thy_vs_Aplan-11-3656-Tail	chr2	181239574	181239574	G	C	Helz2	c.1114C>G	p.Arg372Gly	missense_variant	MODERATE	157	0	0.007722	105	33	0.341	6.30494
Aplan-11-3656-Thy_vs_Aplan-11-3656-Tail	chr3	5403110	5403110	C	G	Zfhx4	c.8327C>G	p.Thr2776Arg	missense_variant	MODERATE	150	0	0.007155	113	61	0.515	5.84216
Aplan-11-3656-Thy_vs_Aplan-11-3656-Tail	chr3	30895837	30895837	G	C	Gpr160	c.57G>C	p.Pro19Pro	synonymous_variant	LOW	101	0	0.012	109	29	0.282	5.95713
Aplan-11-3656-Thy_vs_Aplan-11-3656-Tail	chr3	87800566	87800566	G	C	Insrr	c.314G>C	p.Arg105Pro	missense_variant	MODERATE	75	0	0.014	66	33	0.484	6.20444
Aplan-11-3656-Thy_vs_Aplan-11-3656-Tail	chr3	88097019	88097019	G	C	Iqgap3	c.1411G>C	p.Ala471Pro	missense_variant	MODERATE	76	0	0.016	65	17	0.273	6.27804
Aplan-11-3656-Thy_vs_Aplan-11-3656-Tail	chr3	88113209	88113209	G	C	Iqgap3	c.3853G>C	p.Gly1285Arg	missense_variant	MODERATE	68	0	0.016	66	21	0.352	6.80051
Aplan-11-3656-Thy_vs_Aplan-11-3656-Tail	chr3	89237699	89237699	G	C	Trim46	c.1506C>G	p.Tyr502*	stop_gained	HIGH	24	0	0.045	24	9	0.429	2.80709
Aplan-11-3656-Thy_vs_Aplan-11-3656-Tail	chr3	89242434	89242434	G	C	Trim46	c.754C>G	p.Arg252Gly	missense_variant	MODERATE	44	0	0.025	46	18	0.342	5.99331
Aplan-11-3656-Thy_vs_Aplan-11-3656-Tail	chr3	90070126	90070126	C	T	Tpm3	c.-2608C>T		upstream_gene_variant	MODIFIER	131	0	0.009333	101	52	0.541	5.88857
Aplan-11-3656-Thy_vs_Aplan-11-3656-Tail	chr3	90355688	90355688	G	C	Gatad2b	c.1436G>C	p.Arg479Pro	missense_variant	MODERATE	89	0	0.014	87	40	0.485	6.26642
Aplan-11-3656-Thy_vs_Aplan-11-3656-Tail	chr3	90388758	90388758	G	C	Slc27a3	c.761C>G	p.Pro254Arg	missense_variant	MODERATE	73	0	0.016	52	17	0.311	7.26026
Aplan-11-3656-Thy_vs_Aplan-11-3656-Tail	chr3	90502225	90502225	G	C	Chtop	c.435C>G	p.Ala145Ala	synonymous_variant	LOW	42	0	0.029	41	10	0.272	3.33638
Aplan-11-3656-Thy_vs_Aplan-11-3656-Tail	chr3	95126524	95126524	G	C	Tmod4	c.394G>C	p.Ala132Pro	missense_variant	MODERATE	43	0	0.029	52	11	0.282	3.07199
Aplan-11-3656-Thy_vs_Aplan-11-3656-Tail	chr3	95321775	95321775	G	C	Setdb1	c.*2298C>G		downstream_gene_variant	MODIFIER	102	1	0.021	115	47	0.409	5.91423
Aplan-11-3656-Thy_vs_Aplan-11-3656-Tail	chr3	96702388	96702388	G	C	Pias3	c.1016G>C	p.Arg339Pro	missense_variant	MODERATE	90	0	0.013	86	24	0.299	6.12193
Aplan-11-3656-Thy_vs_Aplan-11-3656-Tail	chr3	101080357	101080357	G	C	Ptgfrn	c.189C>G	p.Ser63Ser	synonymous_variant	LOW	97	0	0.012	79	34	0.446	5.79936
Aplan-11-3656-Thy_vs_Aplan-11-3656-Tail	chr3	135304127	135304127	C	G	Slc9b2	c.-12977C>G		upstream_gene_variant	MODIFIER	97	0	0.012	81	23	0.265	6.52741
Aplan-11-3656-Thy_vs_Aplan-11-3656-Tail	chr3	152220747	152220747	C	G	Fubp1	c.987C>G	p.His329Gln	missense_variant	MODERATE	98	0	0.012	113	39	0.353	6.14546
Aplan-11-3656-Thy_vs_Aplan-11-3656-Tail	chr3	155038576	155038576	C	G	Tnni3k	c.150-12G>C		intron_variant	MODIFIER	30	0	0.036	39	11	0.313	2.79822
Aplan-11-3656-Thy_vs_Aplan-11-3656-Tail	chr4	31985845	31985845	C	G	Map3k7	c.736+31C>G		intron_variant	MODIFIER	41	0	0.027	45	15	0.41	4.72716
Aplan-11-3656-Thy_vs_Aplan-11-3656-Tail	chr4	46345088	46345088	C	G	Foxe1	c.895C>G	p.Arg299Gly	missense_variant	MODERATE	14	0	0.063	15	5	0.375	1.37525
Aplan-11-3656-Thy_vs_Aplan-11-3656-Tail	chr4	62542814	62542814	C	G	4933430I17Rik	c.894+31C>G		intron_variant	MODIFIER	52	0	0.021	44	24	0.548	6.14138
Aplan-11-3656-Thy_vs_Aplan-11-3656-Tail	chr4	63170750	63170750	C	G	Kif12	c.433G>C	p.Val145Leu	missense_variant	MODERATE	34	0	0.033	45	17	0.39	4.82184
Aplan-11-3656-Thy_vs_Aplan-11-3656-Tail	chr4	88683842	88683842	C	G	Ifna2	c.-63G>C		upstream_gene_variant	MODIFIER	214	0	0.00544	155	57	0.378	5.76855
Aplan-11-3656-Thy_vs_Aplan-11-3656-Tail	chr4	101133554	101133554	C	G	Raver2	c.1156-33C>G		intron_variant	MODIFIER	171	0	0.007147	141	52	0.36	5.9028
Aplan-11-3656-Thy_vs_Aplan-11-3656-Tail	chr4	101460670	101460670	C	G	Ak4	c.436C>G	p.Gln146Glu	missense_variant&splice_region_variant	MODERATE	38	0	0.027	48	20	0.444	5.99593
Aplan-11-3656-Thy_vs_Aplan-11-3656-Tail	chr4	102852946	102852946	C	G	Sgip1	c.74C>G	p.Thr25Arg	missense_variant&splice_region_variant	MODERATE	120	1	0.019	110	24	0.212	6.1287
Aplan-11-3656-Thy_vs_Aplan-11-3656-Tail	chr4	107856955	107856955	G	C	Lrp8	c.1475G>C	p.Trp492Ser	missense_variant	MODERATE	94	0	0.012	66	22	0.396	6.51255
Aplan-11-3656-Thy_vs_Aplan-11-3656-Tail	chr4	107887182	107887182	C	G	Magoh	c.347C>G	p.Pro116Arg	missense_variant	MODERATE	86	1	0.015	75	27	0.355	6.37836
Aplan-11-3656-Thy_vs_Aplan-11-3656-Tail	chr4	116592809	116592809	C	G	Gpbp1l1	c.1273C>G	p.Arg425Gly	missense_variant	MODERATE	47	0	0.025	50	12	0.262	3.61333
Aplan-11-3656-Thy_vs_Aplan-11-3656-Tail	chr4	117957406	117957406	C	G	St3gal3	c.741+1022G>C		intron_variant	MODIFIER	154	0	0.008572	103	57	0.513	5.90275
Aplan-11-3656-Thy_vs_Aplan-11-3656-Tail	chr4	118362631	118362631	C	T	Hyi	c.778C>T	p.Arg260Trp	missense_variant	MODERATE	169	2	0.014	130	54	0.433	6.02231
Aplan-11-3656-Thy_vs_Aplan-11-3656-Tail	chr4	119170540	119170540	C	G	Zfp691	c.494G>C	p.Arg165Pro	missense_variant	MODERATE	30	0	0.035	28	17	0.577	6.14573
Aplan-11-3656-Thy_vs_Aplan-11-3656-Tail	chr4	123117191	123117191	G	C	Oxct2b	c.903G>C	p.Thr301Thr	synonymous_variant	LOW	109	0	0.009922	70	20	0.303	6.03504
Aplan-11-3656-Thy_vs_Aplan-11-3656-Tail	chr4	129899861	129899861	C	G	Ptp4a2-E330017L17Rik	n.129899861C>G		intergenic_region	MODIFIER	48	0	0.022	46	26	0.525	6.39219
Aplan-11-3656-Thy_vs_Aplan-11-3656-Tail	chr4	130021631	130021631	C	G	Adgrb2	c.4467C>G	p.Phe1489Leu	missense_variant	MODERATE	80	1	0.03	78	38	0.5	6.10298
Aplan-11-3656-Thy_vs_Aplan-11-3656-Tail	chr4	137936770	137936770	C	G	Ece1	c.677C>G	p.Ala226Gly	missense_variant	MODERATE	89	0	0.015	65	29	0.426	5.86441
Aplan-11-3656-Thy_vs_Aplan-11-3656-Tail	chr4	141322022	141322022	C	G	Epha2	c.2057-41C>G		intron_variant	MODIFIER	76	0	0.015	52	15	0.35	6.46971
Aplan-11-3656-Thy_vs_Aplan-11-3656-Tail	chr4	149156619	149156619	C	G	Pgd	c.832G>C	p.Val278Leu	missense_variant	MODERATE	42	0	0.027	45	11	0.271	3.28794
Aplan-11-3656-Thy_vs_Aplan-11-3656-Tail	chr4	149995891	149995891	G	C	H6pd	c.496C>G	p.Arg166Gly	missense_variant	MODERATE	75	0	0.015	63	18	0.303	6.79515
Aplan-11-3656-Thy_vs_Aplan-11-3656-Tail	chr4	151144953	151144953	C	G	Camta1	c.1421G>C	p.Arg474Pro	missense_variant	MODERATE	67	0	0.019	52	17	0.347	6.87087
Aplan-11-3656-Thy_vs_Aplan-11-3656-Tail	chr4	152375224	152375224	C	G	Chd5	c.3393+23C>G		intron_variant	MODIFIER	41	0	0.029	36	13	0.346	4.90046
Aplan-11-3656-Thy_vs_Aplan-11-3656-Tail	chr4	154924387	154924387	C	G	Tnfrsf14	c.551+27G>C		intron_variant	MODIFIER	29	0	0.04	26	13	0.565	5.14466
Aplan-11-3656-Thy_vs_Aplan-11-3656-Tail	chr4	155854944	155854944	C	G	Dvl1	c.828C>G	p.Gly276Gly	synonymous_variant	LOW	80	0	0.014	54	21	0.401	6.45974
Aplan-11-3656-Thy_vs_Aplan-11-3656-Tail	chr5	25287816	25287816	C	G	Kmt2c	c.12538G>C	p.Gly4180Arg	missense_variant	MODERATE	75	0	0.016	53	15	0.276	6.32522
Aplan-11-3656-Thy_vs_Aplan-11-3656-Tail	chr5	29601292	29601292	C	G	Ube3c	c.931C>G	p.Arg311Gly	missense_variant	MODERATE	152	0	0.007669	127	53	0.382	5.9028
Aplan-11-3656-Thy_vs_Aplan-11-3656-Tail	chr5	31154285	31154285	G	C	Mpv17	c.-548C>G		upstream_gene_variant	MODIFIER	71	0	0.016	45	19	0.432	6.00518
Aplan-11-3656-Thy_vs_Aplan-11-3656-Tail	chr5	31200744	31200744	G	C	Zfp513	c.290C>G	p.Ala97Gly	missense_variant	MODERATE	19	0	0.056	16	8	0.533	3.26215
Aplan-11-3656-Thy_vs_Aplan-11-3656-Tail	chr5	31295135	31295135	G	C	Ift172	c.-4123C>G		upstream_gene_variant	MODIFIER	79	0	0.015	79	35	0.46	5.7245
Aplan-11-3656-Thy_vs_Aplan-11-3656-Tail	chr5	35079789	35079789	G	C	Dok7	c.1386+34G>C		intron_variant	MODIFIER	25	0	0.048	11	6	0.532	3.6249
Aplan-11-3656-Thy_vs_Aplan-11-3656-Tail	chr5	65988472	65988472	C	G	9130230L23Rik	n.910G>C		non_coding_transcript_exon_variant	MODIFIER	81	0	0.015	79	40	0.521	5.94589
Aplan-11-3656-Thy_vs_Aplan-11-3656-Tail	chr5	86124262	86124262	G	C	Uba6	c.2518+49C>G		intron_variant	MODIFIER	63	0	0.017	31	15	0.484	6.73761
Aplan-11-3656-Thy_vs_Aplan-11-3656-Tail	chr5	100765052	100765052	G	C	Helq	c.2961C>G	p.Asn987Lys	missense_variant	MODERATE	77	0	0.015	60	24	0.379	6.56766
Aplan-11-3656-Thy_vs_Aplan-11-3656-Tail	chr5	108313965	108313965	G	C	Pigg	c.161G>C	p.Arg54Pro	missense_variant	MODERATE	83	2	0.03	73	38	0.5	5.98311
Aplan-11-3656-Thy_vs_Aplan-11-3656-Tail	chr5	114242008	114242008	G	C	Acacb	c.6222G>C	p.Thr2074Thr	synonymous_variant	LOW	74	0	0.016	60	22	0.394	6.3245
Aplan-11-3656-Thy_vs_Aplan-11-3656-Tail	chr5	114611151	114611151	C	G	Fam222a	c.407C>G	p.Ser136Trp	missense_variant	MODERATE	42	0	0.027	34	10	0.345	3.86209
Aplan-11-3656-Thy_vs_Aplan-11-3656-Tail	chr5	114749251	114749251	G	C	Git2	c.976C>G	p.Arg326Gly	missense_variant	MODERATE	65	0	0.018	54	25	0.472	6.13071
Aplan-11-3656-Thy_vs_Aplan-11-3656-Tail	chr5	115968965	115968965	C	G	Cit	c.3155C>G	p.Thr1052Arg	missense_variant&splice_region_variant	MODERATE	44	0	0.026	31	18	0.586	6.90592
Aplan-11-3656-Thy_vs_Aplan-11-3656-Tail	chr5	116017958	116017958	G	C	Prkab1	c.656C>G	p.Thr219Arg	missense_variant	MODERATE	50	0	0.023	36	14	0.382	6.07754
Aplan-11-3656-Thy_vs_Aplan-11-3656-Tail	chr5	121149187	121149187	G	C	Ptpn11	c.1140C>G	p.Tyr380*	stop_gained	HIGH	122	0	0.01	100	57	0.547	5.9808
Aplan-11-3656-Thy_vs_Aplan-11-3656-Tail	chr5	121818828	121818828	G	C	Sh2b3	c.869C>G	p.Pro290Arg	missense_variant	MODERATE	45	0	0.023	27	16	0.63	6.71397
Aplan-11-3656-Thy_vs_Aplan-11-3656-Tail	chr5	122888688	122888688	G	C	Kdm2b	c.1720C>G	p.Arg574Gly	missense_variant	MODERATE	32	0	0.035	16	13	0.749	6.51602
Aplan-11-3656-Thy_vs_Aplan-11-3656-Tail	chr5	123879204	123879204	G	C	Hcar1	c.423C>G	p.Ala141Ala	synonymous_variant	LOW	90	0	0.013	88	27	0.312	5.96115
Aplan-11-3656-Thy_vs_Aplan-11-3656-Tail	chr5	124006421	124006421	G	C	Vps37b	c.684C>G	p.Gly228Gly	synonymous_variant	LOW	70	0	0.017	50	28	0.547	5.87271
Aplan-11-3656-Thy_vs_Aplan-11-3656-Tail	chr5	124340811	124340811	G	C	2810006K23Rik	c.494G>C	p.Ser165Thr	missense_variant	MODERATE	38	0	0.027	55	34	0.622	6.03757
Aplan-11-3656-Thy_vs_Aplan-11-3656-Tail	chr5	124794380	124794380	G	A	Dnah10	c.7463G>A	p.Arg2488His	missense_variant	MODERATE	61	0	0.018	51	19	0.349	7.46174
Aplan-11-3656-Thy_vs_Aplan-11-3656-Tail	chr5	124830507	124830507	G	C	Dnah10	c.13103G>C	p.Arg4368Pro	missense_variant	MODERATE	20	0	0.046	33	19	0.531	4.90532
Aplan-11-3656-Thy_vs_Aplan-11-3656-Tail	chr5	129866111	129866111	G	C	Sumf2	c.*3388G>C		downstream_gene_variant	MODIFIER	57	0	0.02	82	23	0.324	5.64694
Aplan-11-3656-Thy_vs_Aplan-11-3656-Tail	chr5	129902271	129902271	G	C	Zbed5	c.1060G>C	p.Val354Leu	missense_variant	MODERATE	114	0	0.009848	113	55	0.451	5.95701
Aplan-11-3656-Thy_vs_Aplan-11-3656-Tail	chr5	134216586	134216586	G	C	Gtf2ird2	c.1685G>C	p.Arg562Pro	missense_variant	MODERATE	54	0	0.02	43	14	0.324	5.55243
Aplan-11-3656-Thy_vs_Aplan-11-3656-Tail	chr5	134586981	134586981	G	C	Rfc2	c.168+14G>C		intron_variant	MODIFIER	91	0	0.013	93	40	0.435	6.2017
Aplan-11-3656-Thy_vs_Aplan-11-3656-Tail	chr5	140631536	140631536	G	C	Ttyh3	c.977C>G	p.Ala326Gly	missense_variant	MODERATE	73	0	0.018	48	18	0.432	6.60481
Aplan-11-3656-Thy_vs_Aplan-11-3656-Tail	chr6	6006427	6006427	C	G	Dync1i1	c.1650+17C>G		intron_variant	MODIFIER	16	0	0.056	11	5	0.5	2.24239
Aplan-11-3656-Thy_vs_Aplan-11-3656-Tail	chr6	8582601	8582601	C	G	Glcci1	c.961C>G	p.Arg321Gly	missense_variant	MODERATE	70	0	0.018	64	18	0.305	6.40605
Aplan-11-3656-Thy_vs_Aplan-11-3656-Tail	chr6	29444073	29444073	G	C	Flnc	c.1885G>C	p.Val629Leu	missense_variant	MODERATE	48	0	0.023	50	25	0.469	5.90965
Aplan-11-3656-Thy_vs_Aplan-11-3656-Tail	chr6	29499125	29499125	C	G	Kcp	c.937G>C	p.Gly313Arg	missense_variant&splice_region_variant	MODERATE	44	0	0.026	60	24	0.382	6.32885
Aplan-11-3656-Thy_vs_Aplan-11-3656-Tail	chr6	46170300	46170300	C	G	Cntnap2	c.1479C>G	p.Gly493Gly	synonymous_variant	LOW	43	0	0.026	50	14	0.325	4.16421
Aplan-11-3656-Thy_vs_Aplan-11-3656-Tail	chr6	46530375	46530375	C	G	Cntnap2	c.2098+46246C>G		intron_variant	MODIFIER	286	0	0.004031	276	106	0.401	5.76345
Aplan-11-3656-Thy_vs_Aplan-11-3656-Tail	chr6	56137368	56137368	C	G	Pde1c	c.1559G>C	p.Arg520Pro	missense_variant	MODERATE	56	0	0.02	73	35	0.446	6.18499
Aplan-11-3656-Thy_vs_Aplan-11-3656-Tail	chr6	56158986	56158986	C	G	Pde1c	c.792G>C	p.Ser264Ser	synonymous_variant	LOW	121	0	0.011	83	40	0.441	5.85256
Aplan-11-3656-Thy_vs_Aplan-11-3656-Tail	chr6	71239637	71239637	C	G	Smyd1	c.227G>C	p.Arg76Pro	missense_variant	MODERATE	66	0	0.018	39	8	0.258	3.65628
Aplan-11-3656-Thy_vs_Aplan-11-3656-Tail	chr6	71543949	71543949	G	C	Chmp3	c.-40G>C		5_prime_UTR_variant	MODIFIER	15	0	0.071	20	6	0.368	1.56923
Aplan-11-3656-Thy_vs_Aplan-11-3656-Tail	chr6	71600783	71600783	G	C	Kdm3a	c.2032C>G	p.Arg678Gly	missense_variant	MODERATE	122	0	0.009826	108	48	0.433	5.82776
Aplan-11-3656-Thy_vs_Aplan-11-3656-Tail	chr6	71964729	71964729	G	C	Polr1a	c.3220G>C	p.Gly1074Arg	missense_variant	MODERATE	50	0	0.022	63	26	0.388	6.18579
Aplan-11-3656-Thy_vs_Aplan-11-3656-Tail	chr6	76942260	76942260	C	G	Ctnna2	c.1955G>C	p.Arg652Pro	missense_variant	MODERATE	76	1	0.03	69	41	0.558	6.45704
Aplan-11-3656-Thy_vs_Aplan-11-3656-Tail	chr6	108541863	108541863	C	G	Itpr1	c.8002-40C>G		intron_variant	MODIFIER	41	0	0.031	28	15	0.5	7.18013
Aplan-11-3656-Thy_vs_Aplan-11-3656-Tail	chr6	108564757	108564757	C	G	Itpr1-0610040F04Rik	n.108564757C>G		intergenic_region	MODIFIER	72	1	0.029	81	40	0.467	5.99712
Aplan-11-3656-Thy_vs_Aplan-11-3656-Tail	chr6	113433119	113433119	C	G	Cidec	c.148G>C	p.Ala50Pro	missense_variant	MODERATE	59	0	0.022	53	13	0.256	4.60618
Aplan-11-3656-Thy_vs_Aplan-11-3656-Tail	chr6	113675642	113675642	C	G	Irak2	c.794C>G	p.Ala265Gly	missense_variant	MODERATE	144	0	0.008463	94	39	0.392	6.3835
Aplan-11-3656-Thy_vs_Aplan-11-3656-Tail	chr6	115978205	115978205	G	C	Plxnd1	c.1680C>G	p.Cys560Trp	missense_variant	MODERATE	57	0	0.023	44	13	0.305	5.19644
Aplan-11-3656-Thy_vs_Aplan-11-3656-Tail	chr6	145246769	145246769	C	G	Kras	c.37G>C	p.Gly13Arg	missense_variant	MODERATE	159	0	0.008004	156	111	0.741	5.96859
Aplan-11-3656-Thy_vs_Aplan-11-3656-Tail	chr7	4482638	4482638	T	C	Ppp1r12c	c.2106A>G	p.Thr702Thr	synonymous_variant	LOW	52	0	0.02	50	11	0.25	3.67846
Aplan-11-3656-Thy_vs_Aplan-11-3656-Tail	chr7	4994241	4994241	C	G	Zfp579	c.670G>C	p.Asp224His	missense_variant	MODERATE	25	0	0.043	23	6	0.35	2.0848
Aplan-11-3656-Thy_vs_Aplan-11-3656-Tail	chr7	5115362	5115362	G	C	Rfpl4	c.208C>G	p.Leu70Val	missense_variant	MODERATE	78	0	0.015	73	39	0.542	5.77279
Aplan-11-3656-Thy_vs_Aplan-11-3656-Tail	chr7	12908001	12908001	C	G	Zscan22	c.*680C>G		3_prime_UTR_variant	MODIFIER	247	0	0.005051	198	79	0.401	5.8517
Aplan-11-3656-Thy_vs_Aplan-11-3656-Tail	chr7	16810903	16810903	C	G	Fkrp	c.1033G>C	p.Gly345Arg	missense_variant	MODERATE	16	0	0.063	22	10	0.486	2.71733
Aplan-11-3656-Thy_vs_Aplan-11-3656-Tail	chr7	16811001	16811001	C	G	Fkrp	c.935G>C	p.Arg312Pro	missense_variant	MODERATE	19	0	0.056	19	5	0.3	1.33412
Aplan-11-3656-Thy_vs_Aplan-11-3656-Tail	chr7	24623890	24623890	C	G	Phldb3	c.1189C>G	p.Arg397Gly	missense_variant	MODERATE	32	1	0.038	11	6	0.6	3.3288
Aplan-11-3656-Thy_vs_Aplan-11-3656-Tail	chr7	25065258	25065258	G	C	Grik5	c.379C>G	p.Arg127Gly	missense_variant	MODERATE	78	0	0.016	93	51	0.563	5.7861
Aplan-11-3656-Thy_vs_Aplan-11-3656-Tail	chr7	25097694	25097694	C	G	Pou2f2	c.575G>C	p.Arg192Pro	missense_variant	MODERATE	31	0	0.034	34	17	0.528	5.85658
Aplan-11-3656-Thy_vs_Aplan-11-3656-Tail	chr7	25203518	25203518	G	C	Dedd2	c.*22C>G		3_prime_UTR_variant	MODIFIER	18	0	0.053	22	13	0.632	4.11925
Aplan-11-3656-Thy_vs_Aplan-11-3656-Tail	chr7	31103344	31103344	C	G	Hpn	c.454G>C	p.Gly152Arg	missense_variant	MODERATE	55	0	0.022	48	16	0.378	5.9982
Aplan-11-3656-Thy_vs_Aplan-11-3656-Tail	chr7	66279397	66279397	G	C	Lrrk1	c.3486C>G	p.Tyr1162*	stop_gained	HIGH	58	1	0.039	45	23	0.513	6.11686
Aplan-11-3656-Thy_vs_Aplan-11-3656-Tail	chr7	66289639	66289639	C	G	Lrrk1	c.2500G>C	p.Gly834Arg	missense_variant	MODERATE	33	0	0.034	33	16	0.538	5.56415
Aplan-11-3656-Thy_vs_Aplan-11-3656-Tail	chr7	75609219	75609219	C	G	Akap13	c.1590C>G	p.Ala530Ala	synonymous_variant	LOW	127	0	0.008801	110	46	0.422	5.67489
Aplan-11-3656-Thy_vs_Aplan-11-3656-Tail	chr7	83882543	83882543	C	G	Mesdc1	c.679G>C	p.Ala227Pro	missense_variant	MODERATE	40	0	0.028	41	22	0.576	6.35279
Aplan-11-3656-Thy_vs_Aplan-11-3656-Tail	chr7	91965643	91965643	G	A	Dlg2	c.789G>A	p.Ala263Ala	synonymous_variant	LOW	162	0	0.007607	133	60	0.44	5.99378
Aplan-11-3656-Thy_vs_Aplan-11-3656-Tail	chr7	97271934	97271934	C	G	Gab2	c.515C>G	p.Thr172Arg	missense_variant	MODERATE	133	0	0.008518	107	31	0.286	5.91168
Aplan-11-3656-Thy_vs_Aplan-11-3656-Tail	chr7	98471151	98471151	C	G	Gucy2d	c.2928C>G	p.Pro976Pro	synonymous_variant	LOW	34	0	0.033	24	10	0.455	4.42497
Aplan-11-3656-Thy_vs_Aplan-11-3656-Tail	chr7	99875123	99875123	G	C	Xrra1	c.271-32G>C		intron_variant	MODIFIER	94	0	0.013	80	46	0.563	6.12227
Aplan-11-3656-Thy_vs_Aplan-11-3656-Tail	chr7	104768775	104768775	G	C	Usp17le	c.1159C>G	p.Gln387Glu	missense_variant	MODERATE	371	2	0.006181	298	140	0.47	5.79266
Aplan-11-3656-Thy_vs_Aplan-11-3656-Tail	chr7	118746490	118746490	C	G	9030624J02Rik	c.317C>G	p.Pro106Arg	missense_variant	MODERATE	28	0	0.041	27	11	0.438	3.96272
Aplan-11-3656-Thy_vs_Aplan-11-3656-Tail	chr7	126452690	126452690	G	C	Atp2a1	c.1384C>G	p.Leu462Val	missense_variant	MODERATE	53	0	0.02	39	14	0.394	5.92181
Aplan-11-3656-Thy_vs_Aplan-11-3656-Tail	chr7	126993633	126993633	G	C	Mvp	c.1105C>G	p.Arg369Gly	missense_variant	MODERATE	39	0	0.029	29	14	0.539	6.2011
Aplan-11-3656-Thy_vs_Aplan-11-3656-Tail	chr7	127419231	127419231	G	C	Zfp688	c.721C>G	p.Arg241Gly	missense_variant	MODERATE	77	0	0.016	61	26	0.431	5.92869
Aplan-11-3656-Thy_vs_Aplan-11-3656-Tail	chr7	127589599	127589599	C	G	Rnf40	c.220C>G	p.Arg74Gly	missense_variant	MODERATE	48	0	0.023	41	22	0.543	6.06826
Aplan-11-3656-Thy_vs_Aplan-11-3656-Tail	chr7	127801189	127801189	C	G	Hsd3b7	c.109C>G	p.Arg37Gly	missense_variant	MODERATE	34	0	0.033	44	19	0.469	5.64859
Aplan-11-3656-Thy_vs_Aplan-11-3656-Tail	chr7	127945391	127945391	G	C	Prss36	c.121C>G	p.Arg41Gly	missense_variant	MODERATE	29	0	0.036	20	7	0.333	3.04458
Aplan-11-3656-Thy_vs_Aplan-11-3656-Tail	chr7	128236735	128236735	G	C	9130023H24Rik	c.685C>G	p.Arg229Gly	missense_variant	MODERATE	40	0	0.027	50	23	0.444	6.75876
Aplan-11-3656-Thy_vs_Aplan-11-3656-Tail	chr7	132876715	132876715	C	G	Fam175b	c.603C>G	p.His201Gln	missense_variant&splice_region_variant	MODERATE	135	0	0.009086	148	38	0.254	6.00632
Aplan-11-3656-Thy_vs_Aplan-11-3656-Tail	chr7	140926534	140926534	G	C	Nlrp6	c.2297G>C	p.Arg766Pro	missense_variant	MODERATE	54	0	0.023	47	25	0.5	6.54652
Aplan-11-3656-Thy_vs_Aplan-11-3656-Tail	chr7	141746758	141746758	C	G	Muc2	c.4588C>G	p.His1530Asp	missense_variant	MODERATE	85	0	0.014	84	21	0.268	6.63256
Aplan-11-3656-Thy_vs_Aplan-11-3656-Tail	chr7	143812536	143812536	C	G	Nadsyn1	c.620G>C	p.Arg207Pro	missense_variant	MODERATE	47	0	0.023	38	13	0.375	5.13493
Aplan-11-3656-Thy_vs_Aplan-11-3656-Tail	chr8	10569623	10569623	G	C	Myo16	c.4173G>C	p.Pro1391Pro	synonymous_variant	LOW	41	0	0.027	32	13	0.4	5.39507
Aplan-11-3656-Thy_vs_Aplan-11-3656-Tail	chr8	13476991	13476991	G	C	Gas6	c.703+53C>G		intron_variant	MODIFIER	39	0	0.031	17	11	0.625	7.08032
Aplan-11-3656-Thy_vs_Aplan-11-3656-Tail	chr8	27152671	27152671	G	C	Rab11fip1	c.2099C>G	p.Ala700Gly	missense_variant	MODERATE	83	0	0.014	82	28	0.357	6.39236
Aplan-11-3656-Thy_vs_Aplan-11-3656-Tail	chr8	44951617	44951617	G	C	Fat1	c.1404G>C	p.Ser468Ser	synonymous_variant	LOW	179	1	0.006392	136	42	0.328	6.24094
Aplan-11-3656-Thy_vs_Aplan-11-3656-Tail	chr8	46528647	46528647	C	G	Acsl1	c.1430C>G	p.Thr477Arg	missense_variant	MODERATE	93	1	0.028	53	22	0.441	5.99883
Aplan-11-3656-Thy_vs_Aplan-11-3656-Tail	chr8	70784767	70784767	C	G	Mast3	c.1762G>C	p.Gly588Arg	missense_variant	MODERATE	71	0	0.017	51	21	0.386	6.21136
Aplan-11-3656-Thy_vs_Aplan-11-3656-Tail	chr8	71649876	71649876	C	G	Unc13a	c.2861G>C	p.Arg954Pro	missense_variant	MODERATE	70	0	0.018	55	20	0.383	6.55049
Aplan-11-3656-Thy_vs_Aplan-11-3656-Tail	chr8	72451424	72451424	G	C	1700030K09Rik	c.1078G>C	p.Asp360His	missense_variant	MODERATE	164	0	0.00805	131	56	0.4	5.95019
Aplan-11-3656-Thy_vs_Aplan-11-3656-Tail	chr8	84260401	84260401	G	C	Ccdc130	c.466C>G	p.Arg156Gly	missense_variant	MODERATE	99	0	0.012	81	45	0.552	6.20863
Aplan-11-3656-Thy_vs_Aplan-11-3656-Tail	chr8	85640730	85640730	G	A	Neto2	c.1468C>T	p.Arg490*	stop_gained	HIGH	129	0	0.009375	116	48	0.424	5.79401
Aplan-11-3656-Thy_vs_Aplan-11-3656-Tail	chr8	105377829	105377829	C	G	Plekhg4	c.1431C>G	p.Leu477Leu	synonymous_variant	LOW	40	0	0.028	31	12	0.461	4.95771
Aplan-11-3656-Thy_vs_Aplan-11-3656-Tail	chr8	105848910	105848910	G	C	Tsnaxip1	c.*4286G>C		downstream_gene_variant	MODIFIER	96	0	0.012	93	51	0.519	5.91982
Aplan-11-3656-Thy_vs_Aplan-11-3656-Tail	chr8	106539100	106539100	C	G	Cdh3	c.774C>G	p.His258Gln	missense_variant	MODERATE	47	0	0.026	38	15	0.412	6.06537
Aplan-11-3656-Thy_vs_Aplan-11-3656-Tail	chr8	110715432	110715432	C	G	Vac14	c.2041C>G	p.Arg681Gly	missense_variant	MODERATE	19	0	0.05	23	12	0.45	3.89679
Aplan-11-3656-Thy_vs_Aplan-11-3656-Tail	chr8	110727390	110727390	C	G	Mtss1l	c.377C>G	p.Ala126Gly	missense_variant	MODERATE	69	0	0.017	39	20	0.457	6.01676
Aplan-11-3656-Thy_vs_Aplan-11-3656-Tail	chr8	110889004	110889004	C	G	Fuk	c.1692G>C	p.Ala564Ala	synonymous_variant	LOW	12	0	0.071	15	6	0.4	1.69832
Aplan-11-3656-Thy_vs_Aplan-11-3656-Tail	chr8	115351722	115351722	C	G	Wwox	c.1141C>G	p.Arg381Gly	missense_variant	MODERATE	39	0	0.032	35	15	0.451	5.74942
Aplan-11-3656-Thy_vs_Aplan-11-3656-Tail	chr8	117050019	117050019	C	T	Pkd1l2	c.2801G>A	p.Arg934Gln	missense_variant	MODERATE	26	0	0.042	24	8	0.318	2.86331
Aplan-11-3656-Thy_vs_Aplan-11-3656-Tail	chr8	120575235	120575235	C	G	Gse1	c.3084C>G	p.Ala1028Ala	synonymous_variant	LOW	32	0	0.035	35	21	0.618	6.05504
Aplan-11-3656-Thy_vs_Aplan-11-3656-Tail	chr8	121605484	121605484	C	G	Zcchc14	c.1220G>C	p.Arg407Pro	missense_variant	MODERATE	15	0	0.063	20	12	0.589	3.73466
Aplan-11-3656-Thy_vs_Aplan-11-3656-Tail	chr8	122336824	122336824	C	G	Zfpm1	c.2621C>G	p.Pro874Arg	missense_variant	MODERATE	32	0	0.034	15	5	0.375	2.70825
Aplan-11-3656-Thy_vs_Aplan-11-3656-Tail	chr8	123369341	123369341	C	G	Spire2	c.2104C>G	p.Arg702Gly	missense_variant	MODERATE	39	0	0.03	47	16	0.343	4.5503
Aplan-11-3656-Thy_vs_Aplan-11-3656-Tail	chr8	126851067	126851067	G	C	Irf2bp2-Tomm20	n.126851067G>C		intergenic_region	MODIFIER	47	0	0.024	28	17	0.609	7.31062
Aplan-11-3656-Thy_vs_Aplan-11-3656-Tail	chr9	14705014	14705014	C	G	Piwil4	c.2264G>C	p.Arg755Pro	missense_variant	MODERATE	49	0	0.024	42	16	0.371	6.19431
Aplan-11-3656-Thy_vs_Aplan-11-3656-Tail	chr9	14797103	14797103	C	G	Mre11a	c.463C>G	p.Arg155Gly	missense_variant	MODERATE	122	0	0.009867	107	34	0.337	5.96688
Aplan-11-3656-Thy_vs_Aplan-11-3656-Tail	chr9	14797129	14797129	C	G	Mre11a	c.489C>G	p.Asp163Glu	missense_variant	MODERATE	112	0	0.011	96	43	0.443	5.75183
Aplan-11-3656-Thy_vs_Aplan-11-3656-Tail	chr9	21109379	21109379	C	G	Tyk2	c.2824G>C	p.Gly942Arg	missense_variant	MODERATE	54	0	0.022	36	10	0.29	4.35229
Aplan-11-3656-Thy_vs_Aplan-11-3656-Tail	chr9	21641068	21641068	C	G	Smarca4	c.1576C>G	p.Arg526Gly	missense_variant	MODERATE	49	0	0.021	39	18	0.486	7.58866
Aplan-11-3656-Thy_vs_Aplan-11-3656-Tail	chr9	21700126	21700126	G	C	Smarca4	c.4534G>C	p.Glu1512Gln	missense_variant	MODERATE	37	0	0.027	36	14	0.387	4.98853
Aplan-11-3656-Thy_vs_Aplan-11-3656-Tail	chr9	22068156	22068156	C	G	Zfp653	c.329G>C	p.Arg110Pro	missense_variant	MODERATE	90	0	0.014	84	46	0.531	6.07757
Aplan-11-3656-Thy_vs_Aplan-11-3656-Tail	chr9	22444242	22444242	G	C	9530077C05Rik	c.*12G>C		3_prime_UTR_variant	MODIFIER	46	0	0.023	51	21	0.425	6.38933
Aplan-11-3656-Thy_vs_Aplan-11-3656-Tail	chr9	35214960	35214960	C	G	Srpr	c.1448C>G	p.Thr483Arg	missense_variant	MODERATE	89	0	0.014	62	24	0.394	5.92728
Aplan-11-3656-Thy_vs_Aplan-11-3656-Tail	chr9	45836914	45836914	C	A	Bace1	c.-2114C>A		upstream_gene_variant	MODIFIER	230	0	0.005481	236	72	0.323	5.8108
Aplan-11-3656-Thy_vs_Aplan-11-3656-Tail	chr9	57604763	57604763	C	G	Cplx3	c.206G>C	p.Arg69Pro	missense_variant	MODERATE	63	0	0.019	65	27	0.413	6.30315
Aplan-11-3656-Thy_vs_Aplan-11-3656-Tail	chr9	60871776	60871776	C	G	Uaca	c.3444C>G	p.Arg1148Arg	synonymous_variant	LOW	47	0	0.024	25	13	0.48	7.13466
Aplan-11-3656-Thy_vs_Aplan-11-3656-Tail	chr9	61416650	61416650	G	C	Tle3	c.2283G>C	p.Ala761Ala	synonymous_variant	LOW	130	0	0.009867	98	25	0.253	6.45293
Aplan-11-3656-Thy_vs_Aplan-11-3656-Tail	chr9	65126775	65126775	G	A	Igdcc4	c.1732G>A	p.Glu578Lys	missense_variant	MODERATE	47	0	0.025	50	22	0.45	5.94719
Aplan-11-3656-Thy_vs_Aplan-11-3656-Tail	chr9	65144409	65144409	C	G	Igdcc3	c.293C>G	p.Thr98Ser	missense_variant	MODERATE	52	0	0.02	51	15	0.32	5.10735
Aplan-11-3656-Thy_vs_Aplan-11-3656-Tail	chr9	65371592	65371592	C	G	Ubap1l	c.172C>G	p.Arg58Gly	missense_variant	MODERATE	44	0	0.028	28	9	0.363	4.09071
Aplan-11-3656-Thy_vs_Aplan-11-3656-Tail	chr9	78402519	78402519	C	G	Ddx43	c.562+38C>G		intron_variant	MODIFIER	68	0	0.016	79	39	0.457	5.8297
Aplan-11-3656-Thy_vs_Aplan-11-3656-Tail	chr9	84424176	84424176	C	G	Bckdhb-4930554C24Rik	n.84424176C>G		intergenic_region	MODIFIER	36	1	0.052	34	15	0.445	4.51179
Aplan-11-3656-Thy_vs_Aplan-11-3656-Tail	chr9	103161106	103161106	C	T	Rab6b	c.226C>T	p.Arg76Cys	missense_variant	MODERATE	71	0	0.017	41	22	0.525	6.90627
Aplan-11-3656-Thy_vs_Aplan-11-3656-Tail	chr9	106196776	106196776	G	C	Ppm1m	c.801+28C>G		intron_variant	MODIFIER	61	0	0.02	47	18	0.377	7.48403
Aplan-11-3656-Thy_vs_Aplan-11-3656-Tail	chr9	108080541	108080541	C	G	Rnf123	c.-2738G>C		upstream_gene_variant	MODIFIER	39	0	0.029	33	12	0.379	4.63648
Aplan-11-3656-Thy_vs_Aplan-11-3656-Tail	chr9	108834028	108834028	C	G	Celsr3	c.4955+17C>G		intron_variant	MODIFIER	36	0	0.031	32	11	0.333	4.07489
Aplan-11-3656-Thy_vs_Aplan-11-3656-Tail	chr9	109065951	109065951	G	C	Atrip	c.1058+15C>G		intron_variant	MODIFIER	70	0	0.017	67	22	0.321	6.17413
Aplan-11-3656-Thy_vs_Aplan-11-3656-Tail	chr9	116129883	116129883	C	G	Tgfbr2	c.462G>C	p.Ala154Ala	synonymous_variant	LOW	99	2	0.025	72	28	0.384	6.12265
Aplan-11-3656-Thy_vs_Aplan-11-3656-Tail	chr9	118536831	118536831	G	C	Golga4	c.950G>C	p.Arg317Pro	missense_variant	MODERATE	63	0	0.019	55	17	0.327	6.31118
Aplan-11-3656-Thy_vs_Aplan-11-3656-Tail	chr9	119535876	119535876	G	C	Scn5a	c.1275C>G	p.Ala425Ala	synonymous_variant	LOW	44	0	0.031	32	13	0.414	5.64311
Aplan-11-3656-Thy_vs_Aplan-11-3656-Tail	chr9	120422523	120422523	C	G	Myrip	c.711C>G	p.Ala237Ala	synonymous_variant	LOW	26	0	0.04	29	14	0.5	4.69824
Aplan-11-3656-Thy_vs_Aplan-11-3656-Tail	chr9	121789089	121789089	C	G	Hhatl	c.599G>C	p.Arg200Pro	missense_variant	MODERATE	75	0	0.016	41	18	0.402	6.27624
Aplan-11-3656-Thy_vs_Aplan-11-3656-Tail	chr9	123182269	123182269	C	G	Cdcp1	c.1142G>C	p.Arg381Pro	missense_variant	MODERATE	57	0	0.024	65	26	0.404	5.93559
Aplan-11-3656-Thy_vs_Aplan-11-3656-Tail	chr10	4558546	4558546	G	C	Ccdc170	c.1751G>C	p.Arg584Pro	missense_variant	MODERATE	176	0	0.006752	158	45	0.288	6.23064
Aplan-11-3656-Thy_vs_Aplan-11-3656-Tail	chr10	27036065	27036065	C	G	Lama2	c.6872G>C	p.Arg2291Pro	missense_variant	MODERATE	102	0	0.012	89	47	0.528	6.28746
Aplan-11-3656-Thy_vs_Aplan-11-3656-Tail	chr10	60186259	60186259	G	C	Chst3	c.783C>G	p.Gly261Gly	synonymous_variant	LOW	48	1	0.024	42	21	0.516	6.99645
Aplan-11-3656-Thy_vs_Aplan-11-3656-Tail	chr10	60774517	60774517	G	C	Unc5b	c.1520C>G	p.Pro507Arg	missense_variant	MODERATE	35	0	0.03	32	9	0.304	3.1831
Aplan-11-3656-Thy_vs_Aplan-11-3656-Tail	chr10	62625141	62625141	G	C	Ddx50	c.1586+4C>G		splice_region_variant&intron_variant	LOW	114	0	0.011	116	42	0.357	6.03982
Aplan-11-3656-Thy_vs_Aplan-11-3656-Tail	chr10	75927306	75927306	G	C	Mmp11	c.494+41C>G		intron_variant	MODIFIER	57	0	0.021	51	14	0.296	5.03381
Aplan-11-3656-Thy_vs_Aplan-11-3656-Tail	chr10	76440297	76440297	G	C	Pcnt	c.113C>G	p.Thr38Arg	missense_variant	MODERATE	48	0	0.024	62	25	0.401	6.46575
Aplan-11-3656-Thy_vs_Aplan-11-3656-Tail	chr10	79644694	79644694	G	C	Odf3l2	c.155C>G	p.Pro52Arg	missense_variant	MODERATE	74	0	0.017	47	16	0.356	7.37655
Aplan-11-3656-Thy_vs_Aplan-11-3656-Tail	chr10	79740223	79740223	C	G	Polrmt	c.1685G>C	p.Arg562Pro	missense_variant	MODERATE	33	0	0.037	25	10	0.375	4.20312
Aplan-11-3656-Thy_vs_Aplan-11-3656-Tail	chr10	80313219	80313219	G	C	Apc2	c.4019G>C	p.Arg1340Pro	missense_variant	MODERATE	26	0	0.043	24	11	0.471	4.17506
Aplan-11-3656-Thy_vs_Aplan-11-3656-Tail	chr10	80325969	80325969	G	C	Pcsk4	c.488C>G	p.Pro163Arg	missense_variant	MODERATE	77	0	0.014	65	31	0.489	6.57011
Aplan-11-3656-Thy_vs_Aplan-11-3656-Tail	chr10	80889446	80889446	G	C	Tmprss9	c.1240G>C	p.Gly414Arg	missense_variant	MODERATE	54	0	0.023	40	17	0.42	7.37531
Aplan-11-3656-Thy_vs_Aplan-11-3656-Tail	chr10	81179266	81179266	A	T	Eef2	c.791+7A>T		splice_region_variant&intron_variant	LOW	98	0	0.011	85	38	0.453	5.99591
Aplan-11-3656-Thy_vs_Aplan-11-3656-Tail	chr10	81279342	81279342	G	C	Tjp3	c.1128C>G	p.Pro376Pro	synonymous_variant	LOW	33	0	0.031	32	16	0.483	5.56415
Aplan-11-3656-Thy_vs_Aplan-11-3656-Tail	chr10	127029620	127029620	G	C	Tsfm	c.291C>G	p.His97Gln	missense_variant	MODERATE	90	0	0.013	75	31	0.415	6.34998
Aplan-11-3656-Thy_vs_Aplan-11-3656-Tail	chr10	127548524	127548524	C	T	Lrp1	c.10821+14G>A		intron_variant	MODIFIER	62	0	0.02	58	36	0.632	6.10031
Aplan-11-3656-Thy_vs_Aplan-11-3656-Tail	chr10	127663789	127663789	G	C	Nab2	c.1042C>G	p.Arg348Gly	missense_variant	MODERATE	74	0	0.016	58	22	0.399	5.8479
Aplan-11-3656-Thy_vs_Aplan-11-3656-Tail	chr10	127714985	127714985	G	C	Myo1a	c.1865G>C	p.Arg622Thr	missense_variant	MODERATE	48	0	0.024	41	10	0.278	3.65665
Aplan-11-3656-Thy_vs_Aplan-11-3656-Tail	chr10	128794948	128794948	C	T	Mmp19	c.436C>T	p.Arg146Trp	missense_variant	MODERATE	27	0	0.038	25	16	0.64	6.70523
Aplan-11-3656-Thy_vs_Aplan-11-3656-Tail	chr10	128953504	128953504	G	C	Itga7	c.2915G>C	p.Arg972Pro	missense_variant	MODERATE	51	0	0.021	36	8	0.242	3.28579
Aplan-11-3656-Thy_vs_Aplan-11-3656-Tail	chr11	3998818	3998818	C	G	Gal3st1	c.1024C>G	p.Arg342Gly	missense_variant	MODERATE	28	0	0.037	40	14	0.371	3.69725
Aplan-11-3656-Thy_vs_Aplan-11-3656-Tail	chr11	4915471	4915471	C	G	AA413626	n.-3045C>G		upstream_gene_variant	MODIFIER	143	0	0.008436	122	63	0.53	5.94088
Aplan-11-3656-Thy_vs_Aplan-11-3656-Tail	chr11	6398723	6398723	C	T	Zmiz2	c.1239C>T	p.Ser413Ser	splice_region_variant&synonymous_variant	LOW	56	0	0.021	39	13	0.357	5.63311
Aplan-11-3656-Thy_vs_Aplan-11-3656-Tail	chr11	9328070	9328070	C	T	Abca13	c.9249C>T	p.Ile3083Ile	synonymous_variant	LOW	57	0	0.02	70	27	0.436	6.43385
Aplan-11-3656-Thy_vs_Aplan-11-3656-Tail	chr11	32211991	32211991	G	C	Rhbdf1	c.1590C>G	p.Pro530Pro	synonymous_variant	LOW	60	0	0.021	64	22	0.365	6.36205
Aplan-11-3656-Thy_vs_Aplan-11-3656-Tail	chr11	33623813	33623813	C	G	Gabrp-Kcnip1	n.33623813C>G		intergenic_region	MODIFIER	247	0	0.004773	221	113	0.488	5.81648
Aplan-11-3656-Thy_vs_Aplan-11-3656-Tail	chr11	43598716	43598716	G	C	Fabp6	c.97C>G	p.Arg33Gly	missense_variant	MODERATE	71	0	0.017	72	17	0.218	5.28102
Aplan-11-3656-Thy_vs_Aplan-11-3656-Tail	chr11	49460045	49460045	G	C	Olfr1387	c.365G>C	p.Arg122Pro	missense_variant	MODERATE	294	0	0.003952	226	77	0.337	5.82
Aplan-11-3656-Thy_vs_Aplan-11-3656-Tail	chr11	49524298	49524298	G	C	Olfr1383	c.574G>C	p.Gly192Arg	missense_variant	MODERATE	373	0	0.003129	296	95	0.325	5.68919
Aplan-11-3656-Thy_vs_Aplan-11-3656-Tail	chr11	54660951	54660951	C	T	Rapgef6	c.2644C>T	p.Arg882Cys	missense_variant	MODERATE	97	1	0.024	87	42	0.501	6.33632
Aplan-11-3656-Thy_vs_Aplan-11-3656-Tail	chr11	60631559	60631559	G	C	Alkbh5-Llgl1	n.60631559G>C		intergenic_region	MODIFIER	78	0	0.015	96	43	0.471	5.88594
Aplan-11-3656-Thy_vs_Aplan-11-3656-Tail	chr11	62219308	62219308	G	C	Specc1	c.3111G>C	p.Thr1037Thr	synonymous_variant	LOW	61	0	0.019	43	26	0.528	6.50381
Aplan-11-3656-Thy_vs_Aplan-11-3656-Tail	chr11	63158401	63158401	C	G	Pmp22	c.469C>G	p.Arg157Gly	missense_variant	MODERATE	47	0	0.023	51	20	0.387	5.8879
Aplan-11-3656-Thy_vs_Aplan-11-3656-Tail	chr11	69825603	69825603	C	G	Nlgn2	c.2111G>C	p.Arg704Pro	missense_variant	MODERATE	18	0	0.056	22	9	0.434	2.69964
Aplan-11-3656-Thy_vs_Aplan-11-3656-Tail	chr11	70463562	70463562	G	C	Zmynd15	c.1250G>C	p.Ser417Thr	missense_variant	MODERATE	63	0	0.018	48	22	0.488	6.03903
Aplan-11-3656-Thy_vs_Aplan-11-3656-Tail	chr11	70651189	70651189	C	G	Rnf167	c.1019C>G	p.Pro340Arg	missense_variant	MODERATE	63	0	0.018	49	21	0.44	5.9872
Aplan-11-3656-Thy_vs_Aplan-11-3656-Tail	chr11	77468603	77468603	C	G	Coro6	c.1001C>G	p.Ala334Gly	missense_variant	MODERATE	73	0	0.016	62	23	0.385	5.96876
Aplan-11-3656-Thy_vs_Aplan-11-3656-Tail	chr11	78277052	78277052	C	G	2610507B11Rik	c.4312C>G	p.Arg1438Gly	missense_variant	MODERATE	135	0	0.008874	150	70	0.469	6.00322
Aplan-11-3656-Thy_vs_Aplan-11-3656-Tail	chr11	78502196	78502196	C	G	Vtn	c.1386C>G	p.Tyr462*	stop_gained	HIGH	117	0	0.011	102	47	0.496	6.06815
Aplan-11-3656-Thy_vs_Aplan-11-3656-Tail	chr11	79685425	79685425	G	C	Rab11fip4	c.1066G>C	p.Asp356His	missense_variant	MODERATE	76	0	0.016	53	15	0.275	6.3789
Aplan-11-3656-Thy_vs_Aplan-11-3656-Tail	chr11	82928966	82928966	C	G	Unc45b	c.1582C>G	p.Arg528Gly	missense_variant	MODERATE	23	0	0.043	14	7	0.462	3.4771
Aplan-11-3656-Thy_vs_Aplan-11-3656-Tail	chr11	85543946	85543946	G	C	Bcas3	c.1656G>C	p.Ala552Ala	synonymous_variant	LOW	89	0	0.015	73	33	0.459	5.8998
Aplan-11-3656-Thy_vs_Aplan-11-3656-Tail	chr11	94504893	94504893	C	G	Mycbpap	c.2244G>C	p.Ser748Ser	synonymous_variant	LOW	32	0	0.038	42	7	0.206	1.7731
Aplan-11-3656-Thy_vs_Aplan-11-3656-Tail	chr11	95065820	95065820	C	G	Itga3	c.607G>C	p.Gly203Arg	missense_variant	MODERATE	40	0	0.028	58	19	0.333	4.89597
Aplan-11-3656-Thy_vs_Aplan-11-3656-Tail	chr11	95831131	95831131	G	C	Phospho1	c.626G>C	p.Cys209Ser	missense_variant	MODERATE	18	0	0.058	20	12	0.571	4.27259
Aplan-11-3656-Thy_vs_Aplan-11-3656-Tail	chr11	97339077	97339077	G	C	Gpr179	c.2251C>G	p.Arg751Gly	missense_variant	MODERATE	28	0	0.033	20	11	0.568	5.12881
Aplan-11-3656-Thy_vs_Aplan-11-3656-Tail	chr11	98009593	98009593	G	C	Cacnb1	c.1009C>G	p.Arg337Gly	missense_variant	MODERATE	71	0	0.016	72	26	0.361	5.83562
Aplan-11-3656-Thy_vs_Aplan-11-3656-Tail	chr11	98390664	98390664	C	G	Pnmt	c.*2567C>G		downstream_gene_variant	MODIFIER	11	0	0.077	14	5	0.361	1.3337
Aplan-11-3656-Thy_vs_Aplan-11-3656-Tail	chr11	98453507	98453507	C	G	Grb7	c.934C>G	p.Arg312Gly	missense_variant	MODERATE	71	0	0.016	58	31	0.518	6.16938
Aplan-11-3656-Thy_vs_Aplan-11-3656-Tail	chr11	98800422	98800422	C	G	Msl1	c.1381+40C>G		intron_variant	MODIFIER	35	0	0.03	59	21	0.366	4.80791
Aplan-11-3656-Thy_vs_Aplan-11-3656-Tail	chr11	100741964	100741964	C	G	Kcnh4	c.2696G>C	p.Ser899Thr	missense_variant	MODERATE	35	0	0.039	24	8	0.316	3.47929
Aplan-11-3656-Thy_vs_Aplan-11-3656-Tail	chr11	101460637	101460637	C	G	Ifi35	c.*2245C>G		downstream_gene_variant	MODIFIER	43	0	0.025	33	16	0.517	6.96763
Aplan-11-3656-Thy_vs_Aplan-11-3656-Tail	chr11	102888744	102888744	C	G	Ccdc103	c.*4454C>G		downstream_gene_variant	MODIFIER	51	0	0.023	46	25	0.583	6.66872
Aplan-11-3656-Thy_vs_Aplan-11-3656-Tail	chr11	105346781	105346781	G	C	Mrc2	c.3284G>C	p.Arg1095Pro	missense_variant	MODERATE	25	0	0.04	24	10	0.391	3.62222
Aplan-11-3656-Thy_vs_Aplan-11-3656-Tail	chr11	109653822	109653822	G	A	Prkar1a	c.38G>A	p.Arg13Gln	missense_variant	MODERATE	71	0	0.017	85	26	0.29	5.8121
Aplan-11-3656-Thy_vs_Aplan-11-3656-Tail	chr11	113791497	113791497	G	C	Sdk2	c.6055C>G	p.Pro2019Ala	missense_variant	MODERATE	39	0	0.033	38	12	0.322	4.13268
Aplan-11-3656-Thy_vs_Aplan-11-3656-Tail	chr11	115243699	115243699	C	G	Tmem104	c.1060C>G	p.Arg354Gly	missense_variant	MODERATE	82	0	0.014	57	27	0.481	6.5226
Aplan-11-3656-Thy_vs_Aplan-11-3656-Tail	chr11	116544706	116544706	C	G	Ube2o	c.1255G>C	p.Gly419Arg	missense_variant	MODERATE	88	0	0.012	86	49	0.563	5.8101
Aplan-11-3656-Thy_vs_Aplan-11-3656-Tail	chr11	117870539	117870539	G	C	Tha1	c.484C>G	p.Arg162Gly	missense_variant	MODERATE	35	0	0.031	28	11	0.346	4.45752
Aplan-11-3656-Thy_vs_Aplan-11-3656-Tail	chr11	119242809	119242809	C	G	Ccdc40	c.1564C>G	p.Arg522Gly	missense_variant	MODERATE	32	0	0.032	39	14	0.371	3.91757
Aplan-11-3656-Thy_vs_Aplan-11-3656-Tail	chr11	120726023	120726023	C	G	Lrrc45	c.*5209C>G		downstream_gene_variant	MODIFIER	148	0	0.007786	104	32	0.323	5.90747
Aplan-11-3656-Thy_vs_Aplan-11-3656-Tail	chr12	4295390	4295390	G	C	Ncoa1	c.1956C>G	p.Ala652Ala	synonymous_variant	LOW	119	1	0.009653	95	24	0.265	6.52638
Aplan-11-3656-Thy_vs_Aplan-11-3656-Tail	chr12	26477163	26477163	C	G	Cmpk2	c.1150C>G	p.Arg384Gly	missense_variant	MODERATE	67	1	0.02	38	19	0.5	6.03507
Aplan-11-3656-Thy_vs_Aplan-11-3656-Tail	chr12	29840373	29840373	C	G	Myt1l	c.1821-2022C>G		intron_variant	MODIFIER	65	0	0.019	41	21	0.544	7.17961
Aplan-11-3656-Thy_vs_Aplan-11-3656-Tail	chr12	32193638	32193638	C	G	Pik3cg	c.2833G>C	p.Gly945Arg	missense_variant	MODERATE	135	0	0.009277	117	37	0.313	5.86572
Aplan-11-3656-Thy_vs_Aplan-11-3656-Tail	chr12	52886540	52886540	C	G	Akap6	c.814C>G	p.Arg272Gly	missense_variant	MODERATE	64	0	0.017	50	19	0.439	6.23222
Aplan-11-3656-Thy_vs_Aplan-11-3656-Tail	chr12	70251175	70251175	G	C	Trim9	c.1977C>G	p.Tyr659*	stop_gained	HIGH	63	0	0.02	62	41	0.643	5.88418
Aplan-11-3656-Thy_vs_Aplan-11-3656-Tail	chr12	83777439	83777439	C	G	Papln	c.1640C>G	p.Ser547Trp	missense_variant	MODERATE	78	0	0.016	62	21	0.329	6.80737
Aplan-11-3656-Thy_vs_Aplan-11-3656-Tail	chr12	85130469	85130469	G	C	Dlst	c.988G>C	p.Val330Leu	missense_variant	MODERATE	177	0	0.007228	155	71	0.451	6.0402
Aplan-11-3656-Thy_vs_Aplan-11-3656-Tail	chr12	86720417	86720417	C	G	Angel1	c.1184G>C	p.Arg395Pro	missense_variant	MODERATE	38	0	0.027	35	14	0.364	5.20241
Aplan-11-3656-Thy_vs_Aplan-11-3656-Tail	chr12	99047212	99047212	C	G	Ttc8-4930474N09Rik	n.99047212C>G		intergenic_region	MODIFIER	125	0	0.008716	125	46	0.382	5.9734
Aplan-11-3656-Thy_vs_Aplan-11-3656-Tail	chr12	99909788	99909788	G	C	Tdp1	c.997G>C	p.Ala333Pro	missense_variant	MODERATE	67	0	0.018	51	27	0.546	6.01929
Aplan-11-3656-Thy_vs_Aplan-11-3656-Tail	chr12	101042001	101042001	G	C	Smek1	c.2215C>G	p.Arg739Gly	missense_variant	MODERATE	58	0	0.019	45	16	0.35	6.54067
Aplan-11-3656-Thy_vs_Aplan-11-3656-Tail	chr12	103112943	103112943	C	G	Unc79	c.5309C>G	p.Pro1770Arg	missense_variant	MODERATE	68	0	0.017	59	22	0.389	6.51176
Aplan-11-3656-Thy_vs_Aplan-11-3656-Tail	chr13	19340448	19340448	G	GATATCAGGCACATCATGGGTCAA	Amph-Stard3nl	n.19340448_19340449insATATCAGGCACATCATGGGTCAA		intergenic_region	MODIFIER	232	0	0.004928	36	20	0.601	6.46901
Aplan-11-3656-Thy_vs_Aplan-11-3656-Tail	chr13	23751409	23751409	G	C	Hist1h2ab	c.277G>C	p.Glu93Gln	missense_variant	MODERATE	148	0	0.007823	117	34	0.284	6.40925
Aplan-11-3656-Thy_vs_Aplan-11-3656-Tail	chr13	30753398	30753398	C	G	Irf4	c.493-47C>G		intron_variant	MODIFIER	50	0	0.023	52	22	0.461	5.94839
Aplan-11-3656-Thy_vs_Aplan-11-3656-Tail	chr13	44930999	44930999	G	C	Dtnbp1	c.664C>G	p.Arg222Gly	missense_variant	MODERATE	37	0	0.033	32	13	0.44	5.04636
Aplan-11-3656-Thy_vs_Aplan-11-3656-Tail	chr13	48812932	48812932	G	C	Phf2	c.2313C>G	p.Gly771Gly	synonymous_variant	LOW	25	0	0.042	21	12	0.55	5.12182
Aplan-11-3656-Thy_vs_Aplan-11-3656-Tail	chr13	49042761	49042761	G	C	Wnk2	c.6179C>G	p.Thr2060Arg	missense_variant	MODERATE	60	0	0.02	59	37	0.592	5.98732
Aplan-11-3656-Thy_vs_Aplan-11-3656-Tail	chr13	49296599	49296599	G	C	Fgd3	c.173C>G	p.Thr58Arg	missense_variant	MODERATE	68	0	0.018	59	21	0.391	6.12822
Aplan-11-3656-Thy_vs_Aplan-11-3656-Tail	chr13	54524153	54524153	G	C	Simc1	c.313G>C	p.Gly105Arg	missense_variant	MODERATE	158	0	0.007086	83	48	0.554	6.02754
Aplan-11-3656-Thy_vs_Aplan-11-3656-Tail	chr13	55400732	55400732	C	G	Slc34a1	c.154C>G	p.Leu52Val	missense_variant	MODERATE	53	0	0.02	46	24	0.497	6.17231
Aplan-11-3656-Thy_vs_Aplan-11-3656-Tail	chr13	56251773	56251773	G	C	Neurog1	c.160C>G	p.Pro54Ala	missense_variant	MODERATE	23	0	0.047	25	7	0.304	2.0062
Aplan-11-3656-Thy_vs_Aplan-11-3656-Tail	chr13	59060306	59060306	C	G	Ntrk2	c.1965C>G	p.Ile655Met	missense_variant	MODERATE	34	0	0.033	25	17	0.653	6.59482
Aplan-11-3656-Thy_vs_Aplan-11-3656-Tail	chr13	84282801	84282801	C	G	Tmem161b	c.537C>G	p.Phe179Leu	missense_variant	MODERATE	138	0	0.008651	108	40	0.375	5.97293
Aplan-11-3656-Thy_vs_Aplan-11-3656-Tail	chr13	95514131	95514131	G	C	F2rl1	c.242C>G	p.Pro81Arg	missense_variant	MODERATE	72	0	0.015	74	31	0.412	6.43814
Aplan-11-3656-Thy_vs_Aplan-11-3656-Tail	chr13	119485847	119485847	C	G	4833420G17Rik	c.1850C>G	p.Ser617Trp	missense_variant	MODERATE	97	0	0.012	83	32	0.412	6.60596
Aplan-11-3656-Thy_vs_Aplan-11-3656-Tail	chr14	5975839	5975839	C	T	Gm3383-LOC100861615	n.5975839C>T		intergenic_region	MODIFIER	229	0	0.005094	217	60	0.28	5.8599
Aplan-11-3656-Thy_vs_Aplan-11-3656-Tail	chr14	7908720	7908720	G	C	Flnb	c.4061+36G>C		intron_variant	MODIFIER	41	0	0.028	39	17	0.457	5.69977
Aplan-11-3656-Thy_vs_Aplan-11-3656-Tail	chr14	20729646	20729646	G	C	Ndst2	c.525C>G	p.Arg175Arg	synonymous_variant	LOW	56	0	0.018	72	34	0.462	5.80514
Aplan-11-3656-Thy_vs_Aplan-11-3656-Tail	chr14	30559720	30559720	C	G	Tkt	c.226-32C>G		intron_variant	MODIFIER	25	0	0.043	21	12	0.58	5.12182
Aplan-11-3656-Thy_vs_Aplan-11-3656-Tail	chr14	31014130	31014130	G	C	Gnl3	c.952C>G	p.Arg318Gly	missense_variant	MODERATE	64	0	0.017	69	28	0.383	6.08169
Aplan-11-3656-Thy_vs_Aplan-11-3656-Tail	chr14	34578604	34578604	G	C	Ldb3	c.312C>G	p.Pro104Pro	synonymous_variant	LOW	37	0	0.029	56	12	0.238	2.56107
Aplan-11-3656-Thy_vs_Aplan-11-3656-Tail	chr14	41122548	41122548	C	G	Mat1a	c.1134C>G	p.Tyr378*	stop_gained	HIGH	112	0	0.012	87	35	0.412	5.89365
Aplan-11-3656-Thy_vs_Aplan-11-3656-Tail	chr14	54366813	54366813	C	G	Oxa1l	c.529C>G	p.Arg177Gly	missense_variant	MODERATE	124	0	0.009468	123	37	0.33	5.85945
Aplan-11-3656-Thy_vs_Aplan-11-3656-Tail	chr14	55778411	55778411	C	G	Adcy4	c.1220G>C	p.Arg407Pro	missense_variant&splice_region_variant	MODERATE	95	0	0.012	84	40	0.457	6.29572
Aplan-11-3656-Thy_vs_Aplan-11-3656-Tail	chr14	55779669	55779669	C	G	Adcy4	c.930+34G>C		intron_variant	MODIFIER	28	1	0.083	29	14	0.444	3.80574
Aplan-11-3656-Thy_vs_Aplan-11-3656-Tail	chr14	57604400	57604400	C	G	Xpo4	c.1457G>C	p.Arg486Pro	missense_variant	MODERATE	52	0	0.023	55	14	0.244	4.29809
Aplan-11-3656-Thy_vs_Aplan-11-3656-Tail	chr14	60298015	60298015	G	C	Mtmr6	c.1347-48G>C		intron_variant	MODIFIER	45	0	0.022	44	11	0.269	3.67777
Aplan-11-3656-Thy_vs_Aplan-11-3656-Tail	chr14	75125932	75125932	G	C	Lrrc63	c.758C>G	p.Pro253Arg	missense_variant	MODERATE	108	0	0.011	114	33	0.302	6.13194
Aplan-11-3656-Thy_vs_Aplan-11-3656-Tail	chr14	78587533	78587533	C	G	Dgkh	c.2681G>C	p.Arg894Pro	missense_variant	MODERATE	212	2	0.012	198	95	0.484	5.85037
Aplan-11-3656-Thy_vs_Aplan-11-3656-Tail	chr14	97840278	97840278	G	C	Dach1	c.1706-38C>G		intron_variant	MODIFIER	122	0	0.009633	92	30	0.337	6.39823
Aplan-11-3656-Thy_vs_Aplan-11-3656-Tail	chr15	28311149	28311149	G	C	Dnah5	c.5273G>C	p.Arg1758Pro	missense_variant	MODERATE	36	0	0.027	49	17	0.303	4.37672
Aplan-11-3656-Thy_vs_Aplan-11-3656-Tail	chr15	76268350	76268350	C	G	Spatc1	c.179C>G	p.Ala60Gly	missense_variant	MODERATE	25	0	0.043	18	5	0.294	2.05057
Aplan-11-3656-Thy_vs_Aplan-11-3656-Tail	chr15	76709380	76709380	G	C	Recql4	c.529C>G	p.Arg177Gly	missense_variant	MODERATE	90	0	0.012	72	29	0.392	6.23911
Aplan-11-3656-Thy_vs_Aplan-11-3656-Tail	chr15	78847683	78847683	G	C	Cdc42ep1	c.327G>C	p.Pro109Pro	synonymous_variant	LOW	60	0	0.02	37	22	0.546	6.73589
Aplan-11-3656-Thy_vs_Aplan-11-3656-Tail	chr15	78849225	78849225	G	C	Cdc42ep1	c.524G>C	p.Arg175Pro	missense_variant	MODERATE	125	0	0.01	98	56	0.56	6.07438
Aplan-11-3656-Thy_vs_Aplan-11-3656-Tail	chr15	79485252	79485252	G	C	Kcnj4	c.526C>G	p.Arg176Gly	missense_variant	MODERATE	48	0	0.023	55	26	0.491	6.22241
Aplan-11-3656-Thy_vs_Aplan-11-3656-Tail	chr15	81952737	81952737	G	C	Pmm1	c.538C>G	p.Arg180Gly	missense_variant	MODERATE	45	0	0.028	41	12	0.273	4.28686
Aplan-11-3656-Thy_vs_Aplan-11-3656-Tail	chr15	83405966	83405966	C	G	Pacsin2	c.-73-3967G>C		intron_variant	MODIFIER	66	0	0.018	64	23	0.366	6.06753
Aplan-11-3656-Thy_vs_Aplan-11-3656-Tail	chr15	83634759	83634759	G	C	Scube1	c.969C>G	p.Cys323Trp	missense_variant	MODERATE	57	0	0.021	40	25	0.6	6.19092
Aplan-11-3656-Thy_vs_Aplan-11-3656-Tail	chr15	85819829	85819829	C	G	Pkdrej	c.1905G>C	p.Ala635Ala	synonymous_variant	LOW	103	0	0.011	98	34	0.384	5.94739
Aplan-11-3656-Thy_vs_Aplan-11-3656-Tail	chr15	91729020	91729020	C	G	Lrrk2	c.2346C>G	p.Gly782Gly	synonymous_variant	LOW	119	0	0.009286	103	31	0.316	6.04942
Aplan-11-3656-Thy_vs_Aplan-11-3656-Tail	chr15	95913395	95913395	C	G	Ano6	c.438C>G	p.Phe146Leu	missense_variant	MODERATE	91	1	0.013	80	29	0.359	5.9146
Aplan-11-3656-Thy_vs_Aplan-11-3656-Tail	chr15	97720648	97720648	C	G	Endou	c.367+50G>C		intron_variant	MODIFIER	41	0	0.026	40	8	0.236	2.62142
Aplan-11-3656-Thy_vs_Aplan-11-3656-Tail	chr15	100587742	100587742	C	G	Pou6f1	c.358+47G>C		intron_variant	MODIFIER	13	0	0.071	13	7	0.533	2.28255
Aplan-11-3656-Thy_vs_Aplan-11-3656-Tail	chr15	102271036	102271036	G	C	Rarg-Mfsd5	n.102271036G>C		intergenic_region	MODIFIER	16	0	0.055	8	5	0.636	2.88024
Aplan-11-3656-Thy_vs_Aplan-11-3656-Tail	chr15	103157829	103157829	G	C	Smug1	c.79C>G	p.Arg27Gly	missense_variant	MODERATE	46	0	0.025	42	19	0.457	6.28705
Aplan-11-3656-Thy_vs_Aplan-11-3656-Tail	chr16	13687565	13687565	C	G	Bfar	c.438C>G	p.Ser146Ser	synonymous_variant	LOW	78	0	0.016	65	24	0.368	6.38248
Aplan-11-3656-Thy_vs_Aplan-11-3656-Tail	chr16	23108792	23108792	C	G	Eif4a2	c.149C>G	p.Ala50Gly	missense_variant	MODERATE	175	1	0.006844	145	78	0.525	6.00007
Aplan-11-3656-Thy_vs_Aplan-11-3656-Tail	chr16	50045990	50045990	C	G	Gm4827	n.200G>C		non_coding_transcript_exon_variant	MODIFIER	65	0	0.017	48	28	0.521	5.86999
Aplan-11-3656-Thy_vs_Aplan-11-3656-Tail	chr16	66784810	66784810	G	C	Cadm2	c.607C>G	p.Arg203Gly	missense_variant	MODERATE	82	1	0.031	64	34	0.49	5.9373
Aplan-11-3656-Thy_vs_Aplan-11-3656-Tail	chr16	91631049	91631049	C	G	Gart	c.1321G>C	p.Gly441Arg	missense_variant	MODERATE	110	1	0.021	114	42	0.387	5.95337
Aplan-11-3656-Thy_vs_Aplan-11-3656-Tail	chr17	12423767	12423767	G	C	Slc22a3	c.1562C>G	p.Pro521Arg	missense_variant	MODERATE	55	0	0.024	41	10	0.25	4.00266
Aplan-11-3656-Thy_vs_Aplan-11-3656-Tail	chr17	12892308	12892308	G	C	Pnldc1	c.1114+12C>G		intron_variant	MODIFIER	140	0	0.008756	99	45	0.443	6.3408
Aplan-11-3656-Thy_vs_Aplan-11-3656-Tail	chr17	13081610	13081610	G	C	Tcp10b	c.1179G>C	p.Thr393Thr	synonymous_variant	LOW	19	0	0.048	21	6	0.304	1.67354
Aplan-11-3656-Thy_vs_Aplan-11-3656-Tail	chr17	24700684	24700684	G	C	Tbl3	c.2395C>G	p.Pro799Ala	missense_variant	MODERATE	58	0	0.019	54	26	0.5	5.96817
Aplan-11-3656-Thy_vs_Aplan-11-3656-Tail	chr17	25787384	25787384	C	G	Ccdc78	c.301C>G	p.Arg101Gly	missense_variant	MODERATE	44	0	0.024	40	12	0.333	4.30588
Aplan-11-3656-Thy_vs_Aplan-11-3656-Tail	chr17	26445814	26445814	G	C	Neurl1b	c.*4019G>C		3_prime_UTR_variant	MODIFIER	53	0	0.023	40	17	0.424	7.28867
Aplan-11-3656-Thy_vs_Aplan-11-3656-Tail	chr17	30656685	30656685	G	C	Dnah8	c.1480G>C	p.Asp494His	missense_variant	MODERATE	138	1	0.017	130	70	0.543	5.758
Aplan-11-3656-Thy_vs_Aplan-11-3656-Tail	chr17	32011242	32011242	C	G	Hsf2bp	c.520G>C	p.Gly174Arg	missense_variant	MODERATE	159	0	0.007741	137	84	0.62	5.89804
Aplan-11-3656-Thy_vs_Aplan-11-3656-Tail	chr17	32528713	32528713	G	C	Cyp4f17	c.1398-4G>C		splice_region_variant&intron_variant	LOW	69	0	0.017	50	22	0.415	6.65048
Aplan-11-3656-Thy_vs_Aplan-11-3656-Tail	chr17	32925342	32925342	G	C	Cyp4f13	c.1376C>G	p.Pro459Arg	missense_variant	MODERATE	164	0	0.007333	102	28	0.284	5.91313
Aplan-11-3656-Thy_vs_Aplan-11-3656-Tail	chr17	33819865	33819865	G	C	Kank3	c.1757G>C	p.Arg586Pro	missense_variant	MODERATE	70	0	0.017	58	18	0.326	6.92572
Aplan-11-3656-Thy_vs_Aplan-11-3656-Tail	chr17	34253890	34253890	G	C	H2-Ob-H2-Ab1	n.34253890G>C		intergenic_region	MODIFIER	57	0	0.022	51	25	0.521	6.47742
Aplan-11-3656-Thy_vs_Aplan-11-3656-Tail	chr17	34647276	34647276	G	C	Atf6b	c.63G>C	p.Thr21Thr	synonymous_variant	LOW	26	0	0.042	23	12	0.55	4.83403
Aplan-11-3656-Thy_vs_Aplan-11-3656-Tail	chr17	35024293	35024293	G	C	Vwa7	c.2009G>C	p.Arg670Pro	missense_variant	MODERATE	69	0	0.018	36	21	0.576	7.10963
Aplan-11-3656-Thy_vs_Aplan-11-3656-Tail	chr17	35033682	35033682	G	C	Msh5	c.1048C>G	p.Arg350Gly	missense_variant	MODERATE	44	0	0.03	39	13	0.411	4.81373
Aplan-11-3656-Thy_vs_Aplan-11-3656-Tail	chr17	35555401	35555401	G	C	Cdsn	c.826G>C	p.Gly276Arg	missense_variant	MODERATE	40	0	0.025	29	13	0.467	5.75552
Aplan-11-3656-Thy_vs_Aplan-11-3656-Tail	chr17	35848064	35848064	G	C	Mdc1	c.1335G>C	p.Thr445Thr	synonymous_variant	LOW	34	0	0.032	38	16	0.44	5.22634
Aplan-11-3656-Thy_vs_Aplan-11-3656-Tail	chr17	36120380	36120380	G	C	H2-T10	c.399C>G	p.His133Gln	missense_variant	MODERATE	189	0	0.006136	197	63	0.325	6.09151
Aplan-11-3656-Thy_vs_Aplan-11-3656-Tail	chr17	46711518	46711518	C	G	Pex6	c.19C>G	p.Arg7Gly	missense_variant	MODERATE	20	0	0.059	29	13	0.5	3.56441
Aplan-11-3656-Thy_vs_Aplan-11-3656-Tail	chr17	50240141	50240141	G	C	AY702103	n.934G>C		non_coding_transcript_exon_variant	MODIFIER	76	0	0.015	75	21	0.309	6.71697
Aplan-11-3656-Thy_vs_Aplan-11-3656-Tail	chr17	56171995	56171995	G	C	Tnfaip8l1	c.284G>C	p.Arg95Pro	missense_variant	MODERATE	46	0	0.025	26	11	0.428	5.59237
Aplan-11-3656-Thy_vs_Aplan-11-3656-Tail	chr17	80048611	80048611	G	C	Hnrnpll	c.946C>G	p.Arg316Gly	missense_variant	MODERATE	241	0	0.00503	259	129	0.493	5.66246
Aplan-11-3656-Thy_vs_Aplan-11-3656-Tail	chr17	80370340	80370340	C	T	Arhgef33	c.1315C>T	p.Arg439*	stop_gained	HIGH	152	0	0.008485	150	42	0.309	6.2716
Aplan-11-3656-Thy_vs_Aplan-11-3656-Tail	chr18	5772500	5772500	C	G	Zeb1	c.2788C>G	p.Arg930Gly	missense_variant	MODERATE	56	0	0.021	53	14	0.256	4.82409
Aplan-11-3656-Thy_vs_Aplan-11-3656-Tail	chr18	20283696	20283696	C	G	Dsg1c	c.2653C>G	p.Arg885Gly	missense_variant	MODERATE	482	0	0.002516	374	168	0.446	5.62095
Aplan-11-3656-Thy_vs_Aplan-11-3656-Tail	chr18	37266268	37266268	C	G	Pcdhb1	c.1271C>G	p.Ala424Gly	missense_variant	MODERATE	177	0	0.006491	132	58	0.462	6.19971
Aplan-11-3656-Thy_vs_Aplan-11-3656-Tail	chr18	37296821	37296821	C	G	Pcdhb2	c.1846C>G	p.Leu616Val	missense_variant	MODERATE	298	1	0.00764	259	125	0.488	5.60033
Aplan-11-3656-Thy_vs_Aplan-11-3656-Tail	chr18	37309491	37309491	C	G	Pcdhb4	c.1853C>G	p.Ala618Gly	missense_variant	MODERATE	305	0	0.003885	245	124	0.495	5.72714
Aplan-11-3656-Thy_vs_Aplan-11-3656-Tail	chr18	42153299	42153299	C	G	Sh3rf2	c.1856C>G	p.Pro619Arg	missense_variant	MODERATE	90	0	0.012	70	35	0.517	5.80586
Aplan-11-3656-Thy_vs_Aplan-11-3656-Tail	chr18	60811365	60811365	G	A	Cd74	c.646G>A	p.Asp216Asn	missense_variant	MODERATE	39	0	0.032	30	14	0.504	6.02659
Aplan-11-3656-Thy_vs_Aplan-11-3656-Tail	chr18	60946935	60946935	G	C	Camk2a	c.158-51G>C		intron_variant	MODIFIER	41	0	0.029	23	12	0.522	6.38543
Aplan-11-3656-Thy_vs_Aplan-11-3656-Tail	chr18	61073665	61073665	C	G	Pdgfrb	c.1950C>G	p.Ser650Ser	synonymous_variant	LOW	107	0	0.012	59	25	0.427	5.97258
Aplan-11-3656-Thy_vs_Aplan-11-3656-Tail	chr18	64556949	64556949	C	G	Atp8b1	c.1711G>C	p.Ala571Pro	missense_variant	MODERATE	27	0	0.043	12	8	0.668	5.09444
Aplan-11-3656-Thy_vs_Aplan-11-3656-Tail	chr18	78159880	78159880	G	C	Slc14a2	c.1731C>G	p.Cys577Trp	missense_variant	MODERATE	17	0	0.059	18	8	0.474	2.53879
Aplan-11-3656-Thy_vs_Aplan-11-3656-Tail	chr19	4003711	4003711	G	C	Doc2g	c.141G>C	p.Pro47Pro	synonymous_variant	LOW	101	0	0.011	91	39	0.444	5.86386
Aplan-11-3656-Thy_vs_Aplan-11-3656-Tail	chr19	4142832	4142832	C	G	Gpr152	c.371C>G	p.Ala124Gly	missense_variant	MODERATE	56	0	0.019	47	18	0.372	7.07983
Aplan-11-3656-Thy_vs_Aplan-11-3656-Tail	chr19	6251665	6251665	C	G	Atg2a	c.2621-41C>G		intron_variant	MODIFIER	76	0	0.015	61	31	0.509	6.11761
Aplan-11-3656-Thy_vs_Aplan-11-3656-Tail	chr19	6490895	6490895	C	G	Nrxn2	c.2877C>G	p.Ile959Met	missense_variant	MODERATE	105	0	0.012	65	32	0.498	5.96358
Aplan-11-3656-Thy_vs_Aplan-11-3656-Tail	chr19	6831123	6831123	C	G	Rps6ka4	c.1665G>C	p.Ala555Ala	synonymous_variant	LOW	44	0	0.027	31	7	0.26	2.87784
Aplan-11-3656-Thy_vs_Aplan-11-3656-Tail	chr19	6831994	6831994	G	C	Rps6ka4	c.1291C>G	p.Arg431Gly	missense_variant	MODERATE	52	0	0.022	38	26	0.616	6.06463
Aplan-11-3656-Thy_vs_Aplan-11-3656-Tail	chr19	7234111	7234111	G	C	Naa40	c.148C>G	p.Arg50Gly	missense_variant	MODERATE	107	0	0.012	96	50	0.495	5.85827
Aplan-11-3656-Thy_vs_Aplan-11-3656-Tail	chr19	7234159	7234159	G	C	Naa40	c.103-3C>G		splice_region_variant&intron_variant	LOW	95	0	0.013	88	45	0.486	6.08676
Aplan-11-3656-Thy_vs_Aplan-11-3656-Tail	chr19	10645098	10645098	C	T	Vwce	c.763C>T	p.Arg255*	stop_gained	HIGH	61	0	0.02	44	11	0.236	4.5117
Aplan-11-3656-Thy_vs_Aplan-11-3656-Tail	chr19	10843400	10843400	G	C	Slc15a3	c.380G>C	p.Arg127Pro	missense_variant	MODERATE	47	0	0.026	52	20	0.386	5.9347
Aplan-11-3656-Thy_vs_Aplan-11-3656-Tail	chr19	29121292	29121292	C	G	Rcl1	c.407C>G	p.Ala136Gly	missense_variant	MODERATE	162	0	0.007848	114	46	0.401	5.93762
Aplan-11-3656-Thy_vs_Aplan-11-3656-Tail	chr19	34924771	34924771	C	G	Kif20b	c.146C>G	p.Ala49Gly	missense_variant&splice_region_variant	MODERATE	123	0	0.009433	124	64	0.532	5.96543
Aplan-11-3656-Thy_vs_Aplan-11-3656-Tail	chr19	37011427	37011427	C	G	Btaf1	c.*23C>G		3_prime_UTR_variant	MODIFIER	74	0	0.015	69	36	0.542	5.75421
Aplan-11-3656-Thy_vs_Aplan-11-3656-Tail	chr19	40723068	40723068	C	G	Entpd1	c.350-19C>G		intron_variant	MODIFIER	81	0	0.014	80	34	0.378	6.3252
Aplan-11-3656-Thy_vs_Aplan-11-3656-Tail	chr19	56381577	56381577	G	C	Nrap	c.592C>G	p.Arg198Gly	missense_variant	MODERATE	77	0	0.016	48	21	0.425	7.00855
Aplan-11-3656-Thy_vs_Aplan-11-3656-Tail	chr19	56381596	56381596	G	C	Nrap	c.573C>G	p.Tyr191*	stop_gained	HIGH	69	0	0.017	40	15	0.371	7.40215
Aplan-11-3656-Thy_vs_Aplan-11-3656-Tail	chr19	56798657	56798657	G	C	Ccdc186	c.1878C>G	p.Ser626Arg	missense_variant	MODERATE	38	0	0.033	37	16	0.382	5.8222
Aplan-11-3656-Thy_vs_Aplan-11-3656-Tail	chr19	56909298	56909298	C	G	Vwa2	c.2034C>G	p.Ala678Ala	synonymous_variant	LOW	50	0	0.023	51	19	0.386	6.31532
Aplan-11-3656-Thy_vs_Aplan-11-3656-Tail	chrX	7665381	7665381	C	G	Prickle3	c.923C>G	p.Ala308Gly	missense_variant	MODERATE	51	1	0.025	24	6	0.304	2.43976
Aplan-11-3656-Thy_vs_Aplan-11-3656-Tail	chrX	7962328	7962328	C	G	Gata1	c.441G>C	p.Thr147Thr	synonymous_variant	LOW	39	0	0.028	29	12	0.393	5.14712
Aplan-11-3656-Thy_vs_Aplan-11-3656-Tail	chrX	20716907	20716907	C	G	Usp11	c.1717C>G	p.Arg573Gly	missense_variant	MODERATE	85	0	0.013	77	27	0.35	6.70219
Aplan-11-3656-Thy_vs_Aplan-11-3656-Tail	chrX	47931842	47931842	C	G	Ocrl	c.616C>G	p.Arg206Gly	missense_variant	MODERATE	104	0	0.011	91	30	0.312	6.26967
Aplan-11-3656-Thy_vs_Aplan-11-3656-Tail	chrX	73778316	73778316	C	G	Srpk3	c.1483C>G	p.Arg495Gly	missense_variant	MODERATE	200	0	0.005969	189	67	0.373	6.10205
Aplan-11-3656-Thy_vs_Aplan-11-3656-Tail	chrX	136518341	136518341	C	G	Kir3dl1	c.70+8C>G		splice_region_variant&intron_variant	LOW	212	0	0.005736	216	80	0.373	5.76582
Aplan-11-3658-BM_vs_Aplan-11th-Exp-Donor-BM-plus-Pooled-Tail-Ref	chr1	4347282	4347282	G	A	Rp1	c.3606C>T	p.Asp1202Asp	synonymous_variant	LOW	280	0	0.004148	109	46	0.441	6.13707
Aplan-11-3658-BM_vs_Aplan-11th-Exp-Donor-BM-plus-Pooled-Tail-Ref	chr1	38811765	38811765	G	C	Lonrf2	c.715C>G	p.Arg239Gly	missense_variant	MODERATE	177	0	0.007177	56	19	0.298	6.73349
Aplan-11-3658-BM_vs_Aplan-11th-Exp-Donor-BM-plus-Pooled-Tail-Ref	chr1	65063082	65063082	G	C	Crygd	c.229C>G	p.Arg77Gly	missense_variant	MODERATE	125	0	0.0095	58	37	0.617	6.24358
Aplan-11-3658-BM_vs_Aplan-11th-Exp-Donor-BM-plus-Pooled-Tail-Ref	chr1	82340702	82340702	G	A	Rhbdd1	c.305G>A	p.Arg102Gln	missense_variant	MODERATE	199	0	0.005833	73	21	0.292	6.99623
Aplan-11-3658-BM_vs_Aplan-11th-Exp-Donor-BM-plus-Pooled-Tail-Ref	chr1	110099302	110099302	G	C	Cdh7	c.1447G>C	p.Ala483Pro	missense_variant	MODERATE	131	0	0.008922	62	25	0.4	6.77012
Aplan-11-3658-BM_vs_Aplan-11th-Exp-Donor-BM-plus-Pooled-Tail-Ref	chr1	153306084	153306084	G	C	Lamc1	c.412+26044C>G		intron_variant	MODIFIER	121	0	0.009025	64	28	0.433	6.52998
Aplan-11-3658-BM_vs_Aplan-11th-Exp-Donor-BM-plus-Pooled-Tail-Ref	chr1	158845154	158845154	C	G	Pappa2	c.3240-22G>C		intron_variant	MODIFIER	172	1	0.007236	53	20	0.374	6.99614
Aplan-11-3658-BM_vs_Aplan-11th-Exp-Donor-BM-plus-Pooled-Tail-Ref	chr1	186969435	186969435	C	G	D1Pas1	c.1560C>G	p.Asp520Glu	missense_variant	MODERATE	196	1	0.006	114	44	0.367	5.89787
Aplan-11-3658-BM_vs_Aplan-11th-Exp-Donor-BM-plus-Pooled-Tail-Ref	chr1	189660042	189660042	C	G	Cenpf	c.1592G>C	p.Arg531Pro	missense_variant	MODERATE	191	0	0.006575	102	25	0.254	6.74732
Aplan-11-3658-BM_vs_Aplan-11th-Exp-Donor-BM-plus-Pooled-Tail-Ref	chr1	189850866	189850866	G	C	Ptpn14	c.1909G>C	p.Gly637Arg	missense_variant	MODERATE	87	0	0.012	27	13	0.481	7.45145
Aplan-11-3658-BM_vs_Aplan-11th-Exp-Donor-BM-plus-Pooled-Tail-Ref	chr2	48929755	48929755	G	C	Orc4	c.379-26C>G		intron_variant	MODIFIER	122	0	0.009873	60	34	0.549	6.0691
Aplan-11-3658-BM_vs_Aplan-11th-Exp-Donor-BM-plus-Pooled-Tail-Ref	chr2	52204827	52204827	C	G	Neb	c.15441G>C	p.Glu5147Asp	missense_variant&splice_region_variant	MODERATE	118	0	0.009965	53	11	0.208	5.93708
Aplan-11-3658-BM_vs_Aplan-11th-Exp-Donor-BM-plus-Pooled-Tail-Ref	chr2	59322642	59322642	C	G	Pkp4	c.1833C>G	p.Asn611Lys	missense_variant	MODERATE	116	0	0.01	50	15	0.302	6.85657
Aplan-11-3658-BM_vs_Aplan-11th-Exp-Donor-BM-plus-Pooled-Tail-Ref	chr2	59843231	59843231	C	T	Tanc1	c.4679C>T	p.Pro1560Leu	missense_variant	MODERATE	140	0	0.008327	38	17	0.459	6.42153
Aplan-11-3658-BM_vs_Aplan-11th-Exp-Donor-BM-plus-Pooled-Tail-Ref	chr2	60234814	60234814	G	C	44992	c.1433G>C	p.Gly478Ala	missense_variant	MODERATE	105	0	0.011	44	14	0.357	6.46502
Aplan-11-3658-BM_vs_Aplan-11th-Exp-Donor-BM-plus-Pooled-Tail-Ref	chr2	76750753	76750753	G	C	Ttn	c.64557C>G	p.Gly21519Gly	synonymous_variant	LOW	258	0	0.004334	93	34	0.367	6.05498
Aplan-11-3658-BM_vs_Aplan-11th-Exp-Donor-BM-plus-Pooled-Tail-Ref	chr2	76885965	76885965	G	C	Ttn	c.20439C>G	p.Ala6813Ala	synonymous_variant	LOW	161	0	0.007256	30	10	0.393	6.7785
Aplan-11-3658-BM_vs_Aplan-11th-Exp-Donor-BM-plus-Pooled-Tail-Ref	chr2	91506014	91506014	C	G	Lrp4	c.5169C>G	p.His1723Gln	missense_variant	MODERATE	329	0	0.003897	90	21	0.24	6.2115
Aplan-11-3658-BM_vs_Aplan-11th-Exp-Donor-BM-plus-Pooled-Tail-Ref	chr2	121348526	121348526	G	C	Ppip5k1	c.718C>G	p.Arg240Gly	missense_variant	MODERATE	243	0	0.004933	84	24	0.28	6.73435
Aplan-11-3658-BM_vs_Aplan-11th-Exp-Donor-BM-plus-Pooled-Tail-Ref	chr2	121549028	121549028	C	G	Frmd5	c.1340G>C	p.Arg447Pro	missense_variant	MODERATE	217	0	0.005547	32	9	0.276	6.5788
Aplan-11-3658-BM_vs_Aplan-11th-Exp-Donor-BM-plus-Pooled-Tail-Ref	chr2	130439086	130439086	C	G	Vps16	c.794C>G	p.Pro265Arg	missense_variant	MODERATE	256	0	0.005097	47	15	0.333	6.44792
Aplan-11-3658-BM_vs_Aplan-11th-Exp-Donor-BM-plus-Pooled-Tail-Ref	chr2	133561478	133561478	G	C	Bmp2	c.948G>C	p.Pro316Pro	synonymous_variant	LOW	143	0	0.008494	51	25	0.509	6.49731
Aplan-11-3658-BM_vs_Aplan-11th-Exp-Donor-BM-plus-Pooled-Tail-Ref	chr2	172427084	172427084	T	G	Cass4	c.1085T>G	p.Val362Gly	missense_variant	MODERATE	167	0	0.006949	46	15	0.349	6.09711
Aplan-11-3658-BM_vs_Aplan-11th-Exp-Donor-BM-plus-Pooled-Tail-Ref	chr2	178347828	178347828	C	G	Sycp2	c.4237G>C	p.Glu1413Gln	missense_variant	MODERATE	324	0	0.003853	149	58	0.377	5.83381
Aplan-11-3658-BM_vs_Aplan-11th-Exp-Donor-BM-plus-Pooled-Tail-Ref	chr3	37714971	37714971	G	C	Gm5148	c.99C>G	p.Pro33Pro	synonymous_variant	LOW	337	0	0.003361	91	24	0.272	6.03368
Aplan-11-3658-BM_vs_Aplan-11th-Exp-Donor-BM-plus-Pooled-Tail-Ref	chr3	38889860	38889860	G	C	Fat4	c.2901G>C	p.Val967Val	synonymous_variant	LOW	186	1	0.006302	68	25	0.397	6.64242
Aplan-11-3658-BM_vs_Aplan-11th-Exp-Donor-BM-plus-Pooled-Tail-Ref	chr3	38983549	38983549	G	C	Fat4	c.11349G>C	p.Thr3783Thr	synonymous_variant	LOW	203	0	0.005737	57	16	0.314	6.56718
Aplan-11-3658-BM_vs_Aplan-11th-Exp-Donor-BM-plus-Pooled-Tail-Ref	chr3	62602664	62602664	C	G	Gpr149	c.1029G>C	p.Pro343Pro	synonymous_variant	LOW	81	0	0.014	42	9	0.235	4.47001
Aplan-11-3658-BM_vs_Aplan-11th-Exp-Donor-BM-plus-Pooled-Tail-Ref	chr3	64090199	64090199	C	G	Vmn2r1	c.1275C>G	p.Asn425Lys	missense_variant	MODERATE	491	0	0.002383	248	90	0.37	5.65654
Aplan-11-3658-BM_vs_Aplan-11th-Exp-Donor-BM-plus-Pooled-Tail-Ref	chr3	75257778	75257778	C	G	Serpini2	c.815G>C	p.Arg272Pro	missense_variant	MODERATE	122	0	0.00956	49	16	0.34	6.37861
Aplan-11-3658-BM_vs_Aplan-11th-Exp-Donor-BM-plus-Pooled-Tail-Ref	chr3	84967383	84967385	ATT	A	Dear1	c.-2022_-2021delAA		upstream_gene_variant	MODIFIER	57	1	0.037	26	7	0.266	3.00427
Aplan-11-3658-BM_vs_Aplan-11th-Exp-Donor-BM-plus-Pooled-Tail-Ref	chr3	88858960	88858960	T	C	Gon4l	c.1356T>C	p.Pro452Pro	synonymous_variant	LOW	76	0	0.017	29	5	0.223	2.91015
Aplan-11-3658-BM_vs_Aplan-11th-Exp-Donor-BM-plus-Pooled-Tail-Ref	chr3	95734876	95734876	T	C	Ecm1	c.1396A>G	p.Ile466Val	missense_variant	MODERATE	352	24	0.065	37	30	0.782	6.32503
Aplan-11-3658-BM_vs_Aplan-11th-Exp-Donor-BM-plus-Pooled-Tail-Ref	chr3	108205650	108205650	G	C	Atxn7l2	c.1115C>G	p.Pro372Arg	missense_variant	MODERATE	59	0	0.019	32	6	0.206	2.86662
Aplan-11-3658-BM_vs_Aplan-11th-Exp-Donor-BM-plus-Pooled-Tail-Ref	chr3	145998725	145998725	G	C	Syde2	c.1431G>C	p.Val477Val	synonymous_variant	LOW	130	0	0.008449	39	18	0.466	6.63126
Aplan-11-3658-BM_vs_Aplan-11th-Exp-Donor-BM-plus-Pooled-Tail-Ref	chr4	52856073	52856073	C	G	Olfr273	c.439G>C	p.Ala147Pro	missense_variant	MODERATE	248	0	0.004828	144	60	0.429	5.73971
Aplan-11-3658-BM_vs_Aplan-11th-Exp-Donor-BM-plus-Pooled-Tail-Ref	chr4	58946374	58946374	C	G	Zkscan16	c.248C>G	p.Thr83Ser	missense_variant	MODERATE	130	0	0.009397	53	16	0.286	6.26351
Aplan-11-3658-BM_vs_Aplan-11th-Exp-Donor-BM-plus-Pooled-Tail-Ref	chr4	62525828	62525828	G	C	4933430I17Rik	c.11G>C	p.Arg4Pro	missense_variant	MODERATE	275	0	0.004664	90	18	0.221	6.91148
Aplan-11-3658-BM_vs_Aplan-11th-Exp-Donor-BM-plus-Pooled-Tail-Ref	chr4	63152585	63152585	G	C	Ambp	c.256C>G	p.Arg86Gly	missense_variant&splice_region_variant	MODERATE	159	0	0.007958	39	14	0.353	7.30592
Aplan-11-3658-BM_vs_Aplan-11th-Exp-Donor-BM-plus-Pooled-Tail-Ref	chr4	107243346	107243346	G	C	Lrrc42	c.474-7C>G		splice_region_variant&intron_variant	LOW	67	0	0.019	21	5	0.249	3.28447
Aplan-11-3658-BM_vs_Aplan-11th-Exp-Donor-BM-plus-Pooled-Tail-Ref	chr4	109454431	109454431	G	A	Rnf11	c.294-9C>T		intron_variant	MODIFIER	84	0	0.015	33	9	0.31	5.33071
Aplan-11-3658-BM_vs_Aplan-11th-Exp-Donor-BM-plus-Pooled-Tail-Ref	chr4	116610749	116610749	G	C	Nasp	c.1038C>G	p.Ala346Ala	synonymous_variant	LOW	380	0	0.00314	114	46	0.384	5.91756
Aplan-11-3658-BM_vs_Aplan-11th-Exp-Donor-BM-plus-Pooled-Tail-Ref	chr4	117108321	117108321	C	G	Ptch2	c.1083+19C>G		intron_variant	MODIFIER	205	1	0.005973	35	14	0.444	6.90102
Aplan-11-3658-BM_vs_Aplan-11th-Exp-Donor-BM-plus-Pooled-Tail-Ref	chr4	118373450	118373450	G	C	Szt2	c.7845C>G	p.Ala2615Ala	synonymous_variant	LOW	133	0	0.007867	34	7	0.212	5.0705
Aplan-11-3658-BM_vs_Aplan-11th-Exp-Donor-BM-plus-Pooled-Tail-Ref	chr4	123323521	123323521	G	C	Oxct2a	c.66C>G	p.Pro22Pro	synonymous_variant	LOW	87	0	0.013	44	9	0.215	4.52306
Aplan-11-3658-BM_vs_Aplan-11th-Exp-Donor-BM-plus-Pooled-Tail-Ref	chr4	124683767	124683767	G	C	Utp11l	c.214C>G	p.Arg72Gly	missense_variant	MODERATE	168	0	0.007308	47	9	0.207	6.2241
Aplan-11-3658-BM_vs_Aplan-11th-Exp-Donor-BM-plus-Pooled-Tail-Ref	chr4	124820148	124820148	G	C	Mtf1	c.406-57G>C		intron_variant	MODIFIER	107	0	0.011	38	13	0.355	6.59287
Aplan-11-3658-BM_vs_Aplan-11th-Exp-Donor-BM-plus-Pooled-Tail-Ref	chr4	130730484	130730484	C	A	Pum1	c.1094C>A	p.Thr365Lys	missense_variant	MODERATE	148	0	0.007811	57	17	0.308	7.05697
Aplan-11-3658-BM_vs_Aplan-11th-Exp-Donor-BM-plus-Pooled-Tail-Ref	chr4	135705390	135705390	G	C	Ifnlr1	c.1136G>C	p.Gly379Ala	missense_variant	MODERATE	117	0	0.009926	20	6	0.368	5.32641
Aplan-11-3658-BM_vs_Aplan-11th-Exp-Donor-BM-plus-Pooled-Tail-Ref	chr4	137539155	137539155	G	C	Hspg2	c.5626G>C	p.Val1876Leu	missense_variant	MODERATE	204	0	0.005844	36	18	0.406	6.6634
Aplan-11-3658-BM_vs_Aplan-11th-Exp-Donor-BM-plus-Pooled-Tail-Ref	chr4	137541445	137541445	G	C	Hspg2	c.6474G>C	p.Ser2158Ser	synonymous_variant	LOW	159	0	0.007478	34	16	0.52	6.80383
Aplan-11-3658-BM_vs_Aplan-11th-Exp-Donor-BM-plus-Pooled-Tail-Ref	chr4	139479504	139479504	G	A	Ubr4	c.14733G>A	p.Thr4911Thr	synonymous_variant	LOW	135	0	0.009428	49	14	0.3	6.98898
Aplan-11-3658-BM_vs_Aplan-11th-Exp-Donor-BM-plus-Pooled-Tail-Ref	chr4	141002052	141002052	G	C	Atp13a2	c.1696G>C	p.Asp566His	missense_variant	MODERATE	58	0	0.02	24	6	0.304	3.41524
Aplan-11-3658-BM_vs_Aplan-11th-Exp-Donor-BM-plus-Pooled-Tail-Ref	chr4	144392777	144392777	C	G	Pramef12	c.1219G>C	p.Gly407Arg	missense_variant	MODERATE	99	0	0.011	50	24	0.484	6.13983
Aplan-11-3658-BM_vs_Aplan-11th-Exp-Donor-BM-plus-Pooled-Tail-Ref	chr4	152356701	152356701	C	G	Chd5	c.597C>G	p.Ser199Arg	missense_variant	MODERATE	194	0	0.006373	32	17	0.5	6.23015
Aplan-11-3658-BM_vs_Aplan-11th-Exp-Donor-BM-plus-Pooled-Tail-Ref	chr4	156217033	156217033	C	G	Perm1	c.33C>G	p.Ser11Arg	missense_variant	MODERATE	92	0	0.014	26	10	0.428	7.26357
Aplan-11-3658-BM_vs_Aplan-11th-Exp-Donor-BM-plus-Pooled-Tail-Ref	chr5	21294720	21294720	C	G	Gsap	c.*4091C>G		downstream_gene_variant	MODIFIER	116	0	0.01	57	13	0.234	6.71075
Aplan-11-3658-BM_vs_Aplan-11th-Exp-Donor-BM-plus-Pooled-Tail-Ref	chr5	52538479	52538479	T	C	Lgi2	c.1137A>G	p.Thr379Thr	synonymous_variant	LOW	118	0	0.01	68	20	0.318	6.58055
Aplan-11-3658-BM_vs_Aplan-11th-Exp-Donor-BM-plus-Pooled-Tail-Ref	chr5	74628452	74628452	C	G	Lnx1	c.393-91G>C		intron_variant	MODIFIER	312	0	0.004185	134	54	0.436	6.10997
Aplan-11-3658-BM_vs_Aplan-11th-Exp-Donor-BM-plus-Pooled-Tail-Ref	chr5	87889446	87889446	G	C	Odam	c.498G>C	p.Gly166Gly	synonymous_variant	LOW	84	0	0.016	54	27	0.488	6.0273
Aplan-11-3658-BM_vs_Aplan-11th-Exp-Donor-BM-plus-Pooled-Tail-Ref	chr5	90464940	90464940	C	G	Alb	c.570C>G	p.Thr190Thr	synonymous_variant	LOW	135	0	0.009373	81	35	0.41	6.28298
Aplan-11-3658-BM_vs_Aplan-11th-Exp-Donor-BM-plus-Pooled-Tail-Ref	chr5	96762694	96762694	C	G	Fras1	c.9981C>G	p.Asp3327Glu	missense_variant	MODERATE	42	0	0.028	24	8	0.32	3.89262
Aplan-11-3658-BM_vs_Aplan-11th-Exp-Donor-BM-plus-Pooled-Tail-Ref	chr5	113258033	113258033	G	A	Sgsm1	c.2818+758C>T		intron_variant	MODIFIER	271	0	0.004861	115	37	0.348	5.80705
Aplan-11-3658-BM_vs_Aplan-11th-Exp-Donor-BM-plus-Pooled-Tail-Ref	chr5	114406829	114406829	C	G	Ube3b	c.1831C>G	p.Arg611Gly	missense_variant	MODERATE	261	0	0.004839	36	9	0.3	6.73923
Aplan-11-3658-BM_vs_Aplan-11th-Exp-Donor-BM-plus-Pooled-Tail-Ref	chr5	115595066	115595066	G	C	Gcn1l1	c.3161G>C	p.Arg1054Pro	missense_variant	MODERATE	482	1	0.002693	64	26	0.415	6.84768
Aplan-11-3658-BM_vs_Aplan-11th-Exp-Donor-BM-plus-Pooled-Tail-Ref	chr5	118095618	118095618	G	C	Fbxw8	c.947C>G	p.Thr316Arg	missense_variant	MODERATE	81	0	0.014	15	7	0.4	6.2677
Aplan-11-3658-BM_vs_Aplan-11th-Exp-Donor-BM-plus-Pooled-Tail-Ref	chr5	129718029	129718029	C	G	Mrps17	c.237C>G	p.His79Gln	missense_variant	MODERATE	262	0	0.005017	47	15	0.282	6.53868
Aplan-11-3658-BM_vs_Aplan-11th-Exp-Donor-BM-plus-Pooled-Tail-Ref	chr5	135732805	135732805	G	C	Por	c.1057+1G>C		splice_donor_variant&intron_variant	HIGH	128	0	0.008929	42	19	0.487	6.79387
Aplan-11-3658-BM_vs_Aplan-11th-Exp-Donor-BM-plus-Pooled-Tail-Ref	chr5	140889186	140889186	G	C	Card11	c.1755-33C>G		intron_variant	MODIFIER	141	0	0.008537	36	16	0.485	6.02456
Aplan-11-3658-BM_vs_Aplan-11th-Exp-Donor-BM-plus-Pooled-Tail-Ref	chr6	4531838	4531838	C	G	Col1a2	c.2314-57C>G		intron_variant	MODIFIER	187	0	0.006238	84	34	0.449	6.39102
Aplan-11-3658-BM_vs_Aplan-11th-Exp-Donor-BM-plus-Pooled-Tail-Ref	chr6	6881734	6881734	C	G	Dlx5	c.153G>C	p.Ala51Ala	synonymous_variant	LOW	225	0	0.005414	35	16	0.419	6.8119
Aplan-11-3658-BM_vs_Aplan-11th-Exp-Donor-BM-plus-Pooled-Tail-Ref	chr6	29417151	29417151	G	C	Ccdc136	c.1970G>C	p.Arg657Pro	missense_variant	MODERATE	104	0	0.011	30	13	0.4	6.11746
Aplan-11-3658-BM_vs_Aplan-11th-Exp-Donor-BM-plus-Pooled-Tail-Ref	chr6	42686528	42686528	G	T	Tcaf1	c.417C>A	p.Val139Val	synonymous_variant	LOW	307	0	0.003921	77	30	0.435	6.25969
Aplan-11-3658-BM_vs_Aplan-11th-Exp-Donor-BM-plus-Pooled-Tail-Ref	chr6	65067125	65067125	C	G	Smarcad1	c.680C>G	p.Pro227Arg	missense_variant	MODERATE	96	0	0.013	45	19	0.428	6.2093
Aplan-11-3658-BM_vs_Aplan-11th-Exp-Donor-BM-plus-Pooled-Tail-Ref	chr6	76497401	76497401	G	C	1700065L07Rik-Ctnna2	n.76497401G>C		intergenic_region	MODIFIER	94	0	0.012	45	17	0.381	6.24167
Aplan-11-3658-BM_vs_Aplan-11th-Exp-Donor-BM-plus-Pooled-Tail-Ref	chr6	83369434	83369434	G	C	Tet3	c.3615C>G	p.Tyr1205*	stop_gained	HIGH	155	0	0.00709	34	10	0.304	6.18264
Aplan-11-3658-BM_vs_Aplan-11th-Exp-Donor-BM-plus-Pooled-Tail-Ref	chr6	83561838	83561838	G	C	Stambp	c.579C>G	p.Cys193Trp	missense_variant	MODERATE	238	0	0.005165	80	29	0.358	6.69026
Aplan-11-3658-BM_vs_Aplan-11th-Exp-Donor-BM-plus-Pooled-Tail-Ref	chr6	86684493	86684493	C	G	Snrnp27	c.-13G>C		upstream_gene_variant	MODIFIER	281	0	0.00445	16	9	0.6	6.16838
Aplan-11-3658-BM_vs_Aplan-11th-Exp-Donor-BM-plus-Pooled-Tail-Ref	chr6	113128486	113128486	C	G	Setd5	c.2421C>G	p.His807Gln	missense_variant	MODERATE	146	0	0.008569	84	27	0.343	6.31343
Aplan-11-3658-BM_vs_Aplan-11th-Exp-Donor-BM-plus-Pooled-Tail-Ref	chr6	113428126	113428126	G	C	Cidec	c.552C>G	p.Ile184Met	missense_variant	MODERATE	110	0	0.011	36	18	0.485	6.31274
Aplan-11-3658-BM_vs_Aplan-11th-Exp-Donor-BM-plus-Pooled-Tail-Ref	chr6	125649140	125649140	G	C	Vwf	c.5688G>C	p.Pro1896Pro	synonymous_variant	LOW	142	0	0.007818	68	22	0.37	6.1943
Aplan-11-3658-BM_vs_Aplan-11th-Exp-Donor-BM-plus-Pooled-Tail-Ref	chr6	127078242	127078242	C	G	Fgf23	c.314C>G	p.Ser105Trp	missense_variant&splice_region_variant	MODERATE	64	0	0.018	28	11	0.385	6.39848
Aplan-11-3658-BM_vs_Aplan-11th-Exp-Donor-BM-plus-Pooled-Tail-Ref	chr6	136486269	136486269	G	C	E330021D16Rik-Atf7ip	n.136486269G>C		intergenic_region	MODIFIER	203	0	0.005961	66	30	0.473	6.66192
Aplan-11-3658-BM_vs_Aplan-11th-Exp-Donor-BM-plus-Pooled-Tail-Ref	chr7	16797795	16797795	C	G	Slc1a5	c.*56C>G		3_prime_UTR_variant	MODIFIER	99	0	0.012	22	6	0.315	4.71189
Aplan-11-3658-BM_vs_Aplan-11th-Exp-Donor-BM-plus-Pooled-Tail-Ref	chr7	19014938	19014938	C	G	Foxa3	c.262G>C	p.Gly88Arg	missense_variant	MODERATE	87	0	0.012	28	14	0.5	6.48283
Aplan-11-3658-BM_vs_Aplan-11th-Exp-Donor-BM-plus-Pooled-Tail-Ref	chr7	23984157	23984157	C	G	Vmn1r181	c.46C>G	p.Leu16Val	missense_variant	MODERATE	606	1	0.002079	203	83	0.436	6.07663
Aplan-11-3658-BM_vs_Aplan-11th-Exp-Donor-BM-plus-Pooled-Tail-Ref	chr7	29238396	29238396	C	G	Yif1b	c.6C>G	p.His2Gln	missense_variant	MODERATE	336	1	0.003746	31	9	0.333	7.3792
Aplan-11-3658-BM_vs_Aplan-11th-Exp-Donor-BM-plus-Pooled-Tail-Ref	chr7	30494518	30494518	G	C	Prodh2	c.591G>C	p.Ser197Ser	synonymous_variant	LOW	75	0	0.014	33	12	0.433	6.89539
Aplan-11-3658-BM_vs_Aplan-11th-Exp-Donor-BM-plus-Pooled-Tail-Ref	chr7	44522344	44522344	G	C	Mybpc2	c.161C>G	p.Pro54Arg	missense_variant	MODERATE	182	0	0.007138	56	12	0.224	6.27433
Aplan-11-3658-BM_vs_Aplan-11th-Exp-Donor-BM-plus-Pooled-Tail-Ref	chr7	44641161	44641161	C	G	Myh14	c.1193G>C	p.Arg398Pro	missense_variant	MODERATE	243	2	0.005498	45	14	0.359	5.98194
Aplan-11-3658-BM_vs_Aplan-11th-Exp-Donor-BM-plus-Pooled-Tail-Ref	chr7	45712508	45712508	G	C	Sphk2	c.504C>G	p.His168Gln	missense_variant	MODERATE	122	0	0.009213	26	5	0.26	3.92439
Aplan-11-3658-BM_vs_Aplan-11th-Exp-Donor-BM-plus-Pooled-Tail-Ref	chr7	66407815	66407815	C	G	Aldh1a3	c.869G>C	p.Cys290Ser	missense_variant	MODERATE	137	0	0.009175	31	6	0.24	4.58827
Aplan-11-3658-BM_vs_Aplan-11th-Exp-Donor-BM-plus-Pooled-Tail-Ref	chr7	81063973	81063973	C	G	Alpk3	c.168C>G	p.His56Gln	missense_variant	MODERATE	249	0	0.004983	155	38	0.236	6.11564
Aplan-11-3658-BM_vs_Aplan-11th-Exp-Donor-BM-plus-Pooled-Tail-Ref	chr7	97349320	97349320	C	G	Kctd21	c.*1216C>G		3_prime_UTR_variant	MODIFIER	334	0	0.003656	81	20	0.257	6.21028
Aplan-11-3658-BM_vs_Aplan-11th-Exp-Donor-BM-plus-Pooled-Tail-Ref	chr7	98498460	98498460	C	G	Lrrc32	c.446C>G	p.Thr149Ser	missense_variant	MODERATE	178	0	0.006433	27	12	0.444	6.26821
Aplan-11-3658-BM_vs_Aplan-11th-Exp-Donor-BM-plus-Pooled-Tail-Ref	chr7	102110803	102110803	C	G	Art1	c.*2C>G		3_prime_UTR_variant	MODIFIER	230	0	0.005014	68	21	0.328	5.9661
Aplan-11-3658-BM_vs_Aplan-11th-Exp-Donor-BM-plus-Pooled-Tail-Ref	chr7	102484714	102484714	G	T	Olfr544	c.405C>A	p.Arg135Arg	synonymous_variant	LOW	232	0	0.004979	120	35	0.287	6.27184
Aplan-11-3658-BM_vs_Aplan-11th-Exp-Donor-BM-plus-Pooled-Tail-Ref	chr7	107714640	107714640	C	G	Ppfibp2	c.766C>G	p.Arg256Gly	missense_variant	MODERATE	60	0	0.02	29	11	0.44	6.02348
Aplan-11-3658-BM_vs_Aplan-11th-Exp-Donor-BM-plus-Pooled-Tail-Ref	chr7	112955074	112955074	C	G	Rassf10	c.881C>G	p.Pro294Arg	missense_variant	MODERATE	63	0	0.017	23	5	0.285	3.01494
Aplan-11-3658-BM_vs_Aplan-11th-Exp-Donor-BM-plus-Pooled-Tail-Ref	chr7	127392422	127392422	C	G	E430018J23Rik	c.392G>C	p.Arg131Pro	missense_variant	MODERATE	403	0	0.002817	101	41	0.415	6.26958
Aplan-11-3658-BM_vs_Aplan-11th-Exp-Donor-BM-plus-Pooled-Tail-Ref	chr7	127585182	127585182	C	G	Ccdc189	c.632G>C	p.Arg211Pro	missense_variant	MODERATE	151	0	0.007297	42	8	0.219	5.54311
Aplan-11-3658-BM_vs_Aplan-11th-Exp-Donor-BM-plus-Pooled-Tail-Ref	chr7	135707644	135707644	C	G	Mki67	c.1077G>C	p.Ala359Ala	synonymous_variant	LOW	173	0	0.006392	78	17	0.209	6.17008
Aplan-11-3658-BM_vs_Aplan-11th-Exp-Donor-BM-plus-Pooled-Tail-Ref	chr7	143799916	143799916	G	C	Nadsyn1	c.1569C>G	p.Leu523Leu	synonymous_variant	LOW	92	0	0.013	39	10	0.281	5.65674
Aplan-11-3658-BM_vs_Aplan-11th-Exp-Donor-BM-plus-Pooled-Tail-Ref	chr8	11006032	11006032	G	C	Irs2	c.2399C>G	p.Ser800Cys	missense_variant	MODERATE	160	0	0.007476	24	8	0.26	7.57945
Aplan-11-3658-BM_vs_Aplan-11th-Exp-Donor-BM-plus-Pooled-Tail-Ref	chr8	22808458	22808458	G	C	Ap3m2	c.-4426C>G		upstream_gene_variant	MODIFIER	95	0	0.011	23	7	0.318	5.33255
Aplan-11-3658-BM_vs_Aplan-11th-Exp-Donor-BM-plus-Pooled-Tail-Ref	chr8	36231123	36231123	G	C	Lonrf1	c.1220C>G	p.Ser407Trp	missense_variant	MODERATE	60	0	0.021	21	7	0.3	4.47573
Aplan-11-3658-BM_vs_Aplan-11th-Exp-Donor-BM-plus-Pooled-Tail-Ref	chr8	40587187	40587187	G	C	Mtmr7	c.598-5C>G		splice_region_variant&intron_variant	LOW	115	0	0.01	45	13	0.316	6.11285
Aplan-11-3658-BM_vs_Aplan-11th-Exp-Donor-BM-plus-Pooled-Tail-Ref	chr8	44951450	44951450	G	C	Fat1	c.1237G>C	p.Gly413Arg	missense_variant	MODERATE	393	0	0.003029	136	52	0.405	5.94951
Aplan-11-3658-BM_vs_Aplan-11th-Exp-Donor-BM-plus-Pooled-Tail-Ref	chr8	45013090	45013090	C	G	Fat1	c.4316C>G	p.Thr1439Arg	missense_variant	MODERATE	106	0	0.011	38	19	0.427	6.4743
Aplan-11-3658-BM_vs_Aplan-11th-Exp-Donor-BM-plus-Pooled-Tail-Ref	chr8	48416992	48416992	G	C	Tenm3	c.749+16C>G		intron_variant	MODIFIER	205	0	0.005974	46	9	0.225	6.93223
Aplan-11-3658-BM_vs_Aplan-11th-Exp-Donor-BM-plus-Pooled-Tail-Ref	chr8	58912553	58912553	G	C	Galntl6	c.-1079C>G		upstream_gene_variant	MODIFIER	200	0	0.005931	63	12	0.23	6.14875
Aplan-11-3658-BM_vs_Aplan-11th-Exp-Donor-BM-plus-Pooled-Tail-Ref	chr8	70108383	70108383	G	C	Ncan	c.1933C>G	p.Arg645Gly	missense_variant	MODERATE	173	0	0.006622	35	8	0.258	6.50808
Aplan-11-3658-BM_vs_Aplan-11th-Exp-Donor-BM-plus-Pooled-Tail-Ref	chr8	70331214	70331214	G	C	Gdf1	c.811G>C	p.Ala271Pro	missense_variant	MODERATE	115	0	0.011	22	7	0.363	5.95513
Aplan-11-3658-BM_vs_Aplan-11th-Exp-Donor-BM-plus-Pooled-Tail-Ref	chr8	70852965	70852965	G	C	Kcnn1	c.600C>G	p.Pro200Pro	synonymous_variant	LOW	49	0	0.021	30	11	0.374	5.21861
Aplan-11-3658-BM_vs_Aplan-11th-Exp-Donor-BM-plus-Pooled-Tail-Ref	chr8	71348704	71348704	C	G	Myo9b	c.3502C>G	p.Arg1168Gly	missense_variant	MODERATE	89	0	0.013	45	9	0.219	4.51744
Aplan-11-3658-BM_vs_Aplan-11th-Exp-Donor-BM-plus-Pooled-Tail-Ref	chr8	71712483	71712483	G	C	Fcho1	c.1329C>G	p.His443Gln	missense_variant	MODERATE	432	1	0.002988	77	18	0.219	6.96183
Aplan-11-3658-BM_vs_Aplan-11th-Exp-Donor-BM-plus-Pooled-Tail-Ref	chr8	72744673	72744673	C	G	Sin3b	c.1239+8C>G		splice_region_variant&intron_variant	LOW	147	0	0.00785	50	18	0.369	7.05933
Aplan-11-3658-BM_vs_Aplan-11th-Exp-Donor-BM-plus-Pooled-Tail-Ref	chr8	107584151	107584151	C	T	Psmd7	c.438+22G>A		intron_variant	MODIFIER	420	11	0.034	71	29	0.383	6.04133
Aplan-11-3658-BM_vs_Aplan-11th-Exp-Donor-BM-plus-Pooled-Tail-Ref	chr8	122416642	122416642	C	G	Zc3h18	c.2887C>G	p.Arg963Gly	missense_variant	MODERATE	40	0	0.028	10	5	0.455	3.92468
Aplan-11-3658-BM_vs_Aplan-11th-Exp-Donor-BM-plus-Pooled-Tail-Ref	chr9	15720787	15720787	C	G	Slc36a4	c.258C>G	p.Ile86Met	missense_variant	MODERATE	145	0	0.008517	49	14	0.25	7.29191
Aplan-11-3658-BM_vs_Aplan-11th-Exp-Donor-BM-plus-Pooled-Tail-Ref	chr9	15992305	15992305	G	C	Fat3	c.8893C>G	p.Arg2965Gly	missense_variant	MODERATE	168	0	0.007509	69	13	0.203	7.34478
Aplan-11-3658-BM_vs_Aplan-11th-Exp-Donor-BM-plus-Pooled-Tail-Ref	chr9	21035583	21035583	G	A	Icam5	c.1406G>A	p.Arg469Gln	missense_variant	MODERATE	96	0	0.012	29	16	0.552	6.79214
Aplan-11-3658-BM_vs_Aplan-11th-Exp-Donor-BM-plus-Pooled-Tail-Ref	chr9	21418374	21418374	G	C	Qtrt1	c.737G>C	p.Ser246Thr	missense_variant	MODERATE	88	0	0.015	29	12	0.478	6.3936
Aplan-11-3658-BM_vs_Aplan-11th-Exp-Donor-BM-plus-Pooled-Tail-Ref	chr9	21988069	21988069	C	G	Rgl3	c.351G>C	p.Pro117Pro	synonymous_variant	LOW	140	0	0.007983	20	8	0.421	7.84995
Aplan-11-3658-BM_vs_Aplan-11th-Exp-Donor-BM-plus-Pooled-Tail-Ref	chr9	35551388	35551388	G	C	Ddx25	c.700C>G	p.Arg234Gly	missense_variant	MODERATE	178	0	0.006884	101	30	0.318	6.09803
Aplan-11-3658-BM_vs_Aplan-11th-Exp-Donor-BM-plus-Pooled-Tail-Ref	chr9	44151503	44151503	G	C	Cbl	c.2684C>G	p.Ala895Gly	missense_variant	MODERATE	130	0	0.00897	41	19	0.514	7.0109
Aplan-11-3658-BM_vs_Aplan-11th-Exp-Donor-BM-plus-Pooled-Tail-Ref	chr9	44249891	44249891	A	G	Pdzd3	c.472T>C	p.Cys158Arg	missense_variant	MODERATE	66	0	0.017	19	8	0.421	5.80395
Aplan-11-3658-BM_vs_Aplan-11th-Exp-Donor-BM-plus-Pooled-Tail-Ref	chr9	45839179	45839179	C	G	Bace1	c.152C>G	p.Ser51Trp	missense_variant	MODERATE	120	0	0.009641	23	5	0.227	4.13983
Aplan-11-3658-BM_vs_Aplan-11th-Exp-Donor-BM-plus-Pooled-Tail-Ref	chr9	51850127	51850127	G	C	Arhgap20	c.3277G>C	p.Asp1093His	missense_variant	MODERATE	180	1	0.006256	75	17	0.22	7.08875
Aplan-11-3658-BM_vs_Aplan-11th-Exp-Donor-BM-plus-Pooled-Tail-Ref	chr9	65958617	65958617	C	G	Csnk1g1	c.77C>G	p.Ser26Trp	missense_variant	MODERATE	91	0	0.013	75	19	0.303	7.17432
Aplan-11-3658-BM_vs_Aplan-11th-Exp-Donor-BM-plus-Pooled-Tail-Ref	chr9	67873860	67873860	G	C	Vps13c	c.630G>C	p.Thr210Thr	synonymous_variant	LOW	359	0	0.003629	87	23	0.273	6.0043
Aplan-11-3658-BM_vs_Aplan-11th-Exp-Donor-BM-plus-Pooled-Tail-Ref	chr9	90218816	90218816	G	C	Tbc1d2b	c.2120C>G	p.Pro707Arg	missense_variant	MODERATE	139	0	0.008489	51	26	0.5	6.9086
Aplan-11-3658-BM_vs_Aplan-11th-Exp-Donor-BM-plus-Pooled-Tail-Ref	chr9	106978657	106978657	G	C	Dock3	c.2302C>G	p.Arg768Gly	missense_variant	MODERATE	86	0	0.015	39	14	0.382	6.23466
Aplan-11-3658-BM_vs_Aplan-11th-Exp-Donor-BM-plus-Pooled-Tail-Ref	chr9	107959481	107959481	G	C	Traip	c.323G>C	p.Arg108Pro	missense_variant	MODERATE	187	0	0.00642	36	6	0.25	4.9135
Aplan-11-3658-BM_vs_Aplan-11th-Exp-Donor-BM-plus-Pooled-Tail-Ref	chr9	123977691	123977691	G	C	Ccr1l1	c.718C>G	p.Arg240Gly	missense_variant	MODERATE	148	0	0.007577	80	21	0.28	6.09211
Aplan-11-3658-BM_vs_Aplan-11th-Exp-Donor-BM-plus-Pooled-Tail-Ref	chr10	18853702	18853702	G	A	Perp	c.355+25G>A		intron_variant	MODIFIER	136	9	0.073	30	28	0.893	6.25684
Aplan-11-3658-BM_vs_Aplan-11th-Exp-Donor-BM-plus-Pooled-Tail-Ref	chr10	41481353	41481353	C	G	Mical1	c.1153C>G	p.Arg385Gly	missense_variant	MODERATE	158	1	0.007604	24	6	0.272	4.73265
Aplan-11-3658-BM_vs_Aplan-11th-Exp-Donor-BM-plus-Pooled-Tail-Ref	chr10	75910214	75910214	G	C	Smarcb1	c.568C>G	p.Arg190Gly	missense_variant	MODERATE	120	0	0.01	38	14	0.4	6.28238
Aplan-11-3658-BM_vs_Aplan-11th-Exp-Donor-BM-plus-Pooled-Tail-Ref	chr10	84720479	84720479	C	G	Polr3b	c.3234C>G	p.Asp1078Glu	missense_variant	MODERATE	134	0	0.009283	41	15	0.382	7.05201
Aplan-11-3658-BM_vs_Aplan-11th-Exp-Donor-BM-plus-Pooled-Tail-Ref	chr10	93847243	93847243	C	G	Usp44	c.1425+129C>G		intron_variant	MODIFIER	208	0	0.005475	80	26	0.347	6.24216
Aplan-11-3658-BM_vs_Aplan-11th-Exp-Donor-BM-plus-Pooled-Tail-Ref	chr10	94749018	94749018	C	G	Cep83	c.984C>G	p.Leu328Leu	synonymous_variant	LOW	112	0	0.012	49	20	0.447	7.02402
Aplan-11-3658-BM_vs_Aplan-11th-Exp-Donor-BM-plus-Pooled-Tail-Ref	chr10	110932014	110932014	C	G	Csrp2	c.59C>G	p.Ala20Gly	missense_variant	MODERATE	145	0	0.008523	23	5	0.249	4.49431
Aplan-11-3658-BM_vs_Aplan-11th-Exp-Donor-BM-plus-Pooled-Tail-Ref	chr11	5915031	5915031	G	C	Gck	c.-20C>G		5_prime_UTR_variant	MODIFIER	97	0	0.013	20	8	0.412	6.73347
Aplan-11-3658-BM_vs_Aplan-11th-Exp-Donor-BM-plus-Pooled-Tail-Ref	chr11	6228600	6228600	G	C	Npc1l1	c.809C>G	p.Pro270Arg	missense_variant	MODERATE	76	0	0.015	36	8	0.2	4.19627
Aplan-11-3658-BM_vs_Aplan-11th-Exp-Donor-BM-plus-Pooled-Tail-Ref	chr11	32216178	32216178	C	G	Rhbdf1	c.81G>C	p.Ala27Ala	synonymous_variant	LOW	109	0	0.009705	27	6	0.209	4.42404
Aplan-11-3658-BM_vs_Aplan-11th-Exp-Donor-BM-plus-Pooled-Tail-Ref	chr11	46123087	46123087	C	G	Adam19	c.909-6C>G		splice_region_variant&intron_variant	LOW	144	0	0.008344	31	17	0.571	6.37729
Aplan-11-3658-BM_vs_Aplan-11th-Exp-Donor-BM-plus-Pooled-Tail-Ref	chr11	50864591	50864591	G	C	Grm6	c.2549G>C	p.Arg850Pro	missense_variant	MODERATE	219	0	0.005701	43	13	0.31	7.36394
Aplan-11-3658-BM_vs_Aplan-11th-Exp-Donor-BM-plus-Pooled-Tail-Ref	chr11	55309033	55309033	G	C	Fat2	c.3214C>G	p.Arg1072Gly	missense_variant	MODERATE	259	0	0.004908	31	10	0.296	6.56659
Aplan-11-3658-BM_vs_Aplan-11th-Exp-Donor-BM-plus-Pooled-Tail-Ref	chr11	58651605	58651605	G	A	Trim58	c.1390G>A	p.Ala464Thr	missense_variant	MODERATE	189	6	0.037	56	21	0.417	6.60859
Aplan-11-3658-BM_vs_Aplan-11th-Exp-Donor-BM-plus-Pooled-Tail-Ref	chr11	69423574	69423574	G	C	Dnah2	c.12268C>G	p.Arg4090Gly	missense_variant	MODERATE	79	0	0.016	34	14	0.44	6.56479
Aplan-11-3658-BM_vs_Aplan-11th-Exp-Donor-BM-plus-Pooled-Tail-Ref	chr11	69588711	69588711	C	G	Trp53	c.636C>G	p.Ser212Arg	missense_variant	MODERATE	281	0	0.004397	78	23	0.331	6.35929
Aplan-11-3658-BM_vs_Aplan-11th-Exp-Donor-BM-plus-Pooled-Tail-Ref	chr11	70652975	70652975	G	C	Pfn1	c.137C>G	p.Ala46Gly	missense_variant	MODERATE	169	0	0.006661	50	15	0.286	7.06132
Aplan-11-3658-BM_vs_Aplan-11th-Exp-Donor-BM-plus-Pooled-Tail-Ref	chr11	70704923	70704923	G	C	Kif1c	c.454G>C	p.Glu152Gln	missense_variant	MODERATE	151	0	0.007995	49	19	0.4	6.7102
Aplan-11-3658-BM_vs_Aplan-11th-Exp-Donor-BM-plus-Pooled-Tail-Ref	chr11	70717490	70717490	C	G	Kif1c	c.1563C>G	p.Gly521Gly	synonymous_variant	LOW	172	0	0.007411	66	18	0.264	6.31162
Aplan-11-3658-BM_vs_Aplan-11th-Exp-Donor-BM-plus-Pooled-Tail-Ref	chr11	79549469	79549469	C	G	Nf1	c.6887C>G	p.Thr2296Arg	missense_variant	MODERATE	177	0	0.007387	81	35	0.477	6.12721
Aplan-11-3658-BM_vs_Aplan-11th-Exp-Donor-BM-plus-Pooled-Tail-Ref	chr11	83429034	83429034	G	C	Gas2l2	c.385+10C>G		intron_variant	MODIFIER	176	0	0.006936	77	21	0.254	6.07499
Aplan-11-3658-BM_vs_Aplan-11th-Exp-Donor-BM-plus-Pooled-Tail-Ref	chr11	87583483	87583483	G	C	45173	c.226G>C	p.Val76Leu	missense_variant	MODERATE	150	0	0.007874	33	16	0.556	6.70955
Aplan-11-3658-BM_vs_Aplan-11th-Exp-Donor-BM-plus-Pooled-Tail-Ref	chr11	94432740	94432740	G	C	Cacna1g	c.3748C>G	p.Arg1250Gly	missense_variant	MODERATE	143	0	0.008463	44	10	0.263	6.65766
Aplan-11-3658-BM_vs_Aplan-11th-Exp-Donor-BM-plus-Pooled-Tail-Ref	chr11	95028498	95028498	C	G	Pdk2	c.950G>C	p.Gly317Ala	missense_variant	MODERATE	153	0	0.007767	24	5	0.24	4.50751
Aplan-11-3658-BM_vs_Aplan-11th-Exp-Donor-BM-plus-Pooled-Tail-Ref	chr11	98763029	98763029	G	C	Thra	c.685G>C	p.Val229Leu	missense_variant	MODERATE	116	0	0.01	36	17	0.455	7.13673
Aplan-11-3658-BM_vs_Aplan-11th-Exp-Donor-BM-plus-Pooled-Tail-Ref	chr11	100119090	100119090	C	G	Krt13	c.953G>C	p.Arg318Pro	missense_variant	MODERATE	142	0	0.007936	39	8	0.216	5.59873
Aplan-11-3658-BM_vs_Aplan-11th-Exp-Donor-BM-plus-Pooled-Tail-Ref	chr11	102259901	102259901	G	C	BC030867	c.1415G>C	p.Arg472Pro	missense_variant	MODERATE	169	0	0.006832	42	13	0.333	6.46058
Aplan-11-3658-BM_vs_Aplan-11th-Exp-Donor-BM-plus-Pooled-Tail-Ref	chr11	102579472	102579472	G	C	Gm11627	n.-353C>G		upstream_gene_variant	MODIFIER	137	0	0.008425	31	16	0.467	6.64796
Aplan-11-3658-BM_vs_Aplan-11th-Exp-Donor-BM-plus-Pooled-Tail-Ref	chr11	103230423	103230423	G	C	Map3k14	c.1572C>G	p.Leu524Leu	synonymous_variant	LOW	122	0	0.009635	43	24	0.553	6.17409
Aplan-11-3658-BM_vs_Aplan-11th-Exp-Donor-BM-plus-Pooled-Tail-Ref	chr11	115905262	115905262	C	G	Smim5	c.87C>G	p.Pro29Pro	synonymous_variant	LOW	183	0	0.007126	39	27	0.656	6.83124
Aplan-11-3658-BM_vs_Aplan-11th-Exp-Donor-BM-plus-Pooled-Tail-Ref	chr11	115957428	115957428	C	G	Sap30bp	c.375C>G	p.Gly125Gly	synonymous_variant	LOW	241	0	0.005418	39	6	0.2	5.28863
Aplan-11-3658-BM_vs_Aplan-11th-Exp-Donor-BM-plus-Pooled-Tail-Ref	chr11	116359832	116359832	G	C	Rnf157	c.542C>G	p.Ser181Trp	missense_variant	MODERATE	85	0	0.013	22	6	0.315	4.3842
Aplan-11-3658-BM_vs_Aplan-11th-Exp-Donor-BM-plus-Pooled-Tail-Ref	chr11	119377779	119377779	G	C	Slc26a11	c.1557G>C	p.Leu519Leu	synonymous_variant	LOW	56	0	0.023	17	10	0.562	7.50444
Aplan-11-3658-BM_vs_Aplan-11th-Exp-Donor-BM-plus-Pooled-Tail-Ref	chr11	120346798	120346798	G	C	Actg1	c.823C>G	p.His275Asp	missense_variant	MODERATE	144	0	0.008604	50	14	0.271	7.16389
Aplan-11-3658-BM_vs_Aplan-11th-Exp-Donor-BM-plus-Pooled-Tail-Ref	chr12	3734977	3734977	G	C	Dtnb	c.1208G>C	p.Arg403Pro	missense_variant	MODERATE	57	0	0.02	32	14	0.41	7.20925
Aplan-11-3658-BM_vs_Aplan-11th-Exp-Donor-BM-plus-Pooled-Tail-Ref	chr12	56533140	56533140	G	C	Nkx2-1	c.1014C>G	p.Pro338Pro	synonymous_variant	LOW	43	1	0.029	14	6	0.429	3.29982
Aplan-11-3658-BM_vs_Aplan-11th-Exp-Donor-BM-plus-Pooled-Tail-Ref	chr12	66723015	66723015	C	G	Mdga2	c.503G>C	p.Arg168Pro	missense_variant	MODERATE	268	0	0.004654	91	47	0.525	6.11307
Aplan-11-3658-BM_vs_Aplan-11th-Exp-Donor-BM-plus-Pooled-Tail-Ref	chr12	72579439	72579439	C	G	Pcnx4	c.3418C>G	p.Arg1140Gly	missense_variant	MODERATE	112	0	0.01	43	10	0.219	5.93211
Aplan-11-3658-BM_vs_Aplan-11th-Exp-Donor-BM-plus-Pooled-Tail-Ref	chr12	102472254	102472254	C	G	Golga5	c.227C>G	p.Thr76Arg	missense_variant	MODERATE	240	0	0.004929	122	27	0.24	6.79801
Aplan-11-3658-BM_vs_Aplan-11th-Exp-Donor-BM-plus-Pooled-Tail-Ref	chr12	104101639	104101639	C	G	Serpina5	c.-13-30C>G		intron_variant	MODIFIER	250	0	0.004919	56	11	0.213	6.70613
Aplan-11-3658-BM_vs_Aplan-11th-Exp-Donor-BM-plus-Pooled-Tail-Ref	chr13	11726917	11726917	C	G	Ryr2	c.6377G>C	p.Arg2126Pro	missense_variant	MODERATE	193	0	0.006693	61	23	0.375	6.86637
Aplan-11-3658-BM_vs_Aplan-11th-Exp-Donor-BM-plus-Pooled-Tail-Ref	chr13	12235475	12235475	C	G	Mtr	c.1021G>C	p.Gly341Arg	missense_variant	MODERATE	335	0	0.00398	72	24	0.356	6.31195
Aplan-11-3658-BM_vs_Aplan-11th-Exp-Donor-BM-plus-Pooled-Tail-Ref	chr13	14613046	14613046	G	C	Mrpl32	c.-28C>G		upstream_gene_variant	MODIFIER	147	0	0.007993	56	21	0.365	6.99504
Aplan-11-3658-BM_vs_Aplan-11th-Exp-Donor-BM-plus-Pooled-Tail-Ref	chr13	24106292	24106292	C	G	Lrrc16a	c.1395+17G>C		intron_variant	MODIFIER	119	0	0.011	51	13	0.3	7.31938
Aplan-11-3658-BM_vs_Aplan-11th-Exp-Donor-BM-plus-Pooled-Tail-Ref	chr13	41026475	41026475	C	G	Mak	c.1874G>C	p.Arg625Pro	missense_variant	MODERATE	144	0	0.008384	33	7	0.216	5.35058
Aplan-11-3658-BM_vs_Aplan-11th-Exp-Donor-BM-plus-Pooled-Tail-Ref	chr13	55011286	55011286	C	G	Hk3	c.1456G>C	p.Ala486Pro	missense_variant	MODERATE	52	0	0.02	18	6	0.35	3.84898
Aplan-11-3658-BM_vs_Aplan-11th-Exp-Donor-BM-plus-Pooled-Tail-Ref	chr13	55213657	55213657	C	G	Nsd1	c.437C>G	p.Thr146Arg	missense_variant	MODERATE	198	0	0.006065	106	32	0.3	5.80399
Aplan-11-3658-BM_vs_Aplan-11th-Exp-Donor-BM-plus-Pooled-Tail-Ref	chr13	65646227	65646227	C	G	Zfp369-Gm10324	n.65646227C>G		intergenic_region	MODIFIER	245	0	0.004689	117	48	0.397	5.86225
Aplan-11-3658-BM_vs_Aplan-11th-Exp-Donor-BM-plus-Pooled-Tail-Ref	chr13	68657342	68657342	G	C	Adcy2	c.2481+25C>G		intron_variant	MODIFIER	102	0	0.012	33	18	0.5	6.46077
Aplan-11-3658-BM_vs_Aplan-11th-Exp-Donor-BM-plus-Pooled-Tail-Ref	chr14	12207310	12207310	G	C	Ptprg	c.2577G>C	p.Met859Ile	missense_variant	MODERATE	150	0	0.00898	69	21	0.363	7.00942
Aplan-11-3658-BM_vs_Aplan-11th-Exp-Donor-BM-plus-Pooled-Tail-Ref	chr14	20649423	20649423	G	C	Myoz1	c.846C>G	p.Asn282Lys	missense_variant	MODERATE	133	0	0.009079	68	20	0.321	5.98864
Aplan-11-3658-BM_vs_Aplan-11th-Exp-Donor-BM-plus-Pooled-Tail-Ref	chr14	26416224	26416224	G	C	Slmap	c.2446-1236C>G		intron_variant	MODIFIER	160	0	0.007884	79	21	0.258	6.55254
Aplan-11-3658-BM_vs_Aplan-11th-Exp-Donor-BM-plus-Pooled-Tail-Ref	chr14	30929791	30929791	G	C	Itih1	c.2605C>G	p.Arg869Gly	missense_variant&splice_region_variant	MODERATE	204	1	0.006205	79	20	0.292	6.67053
Aplan-11-3658-BM_vs_Aplan-11th-Exp-Donor-BM-plus-Pooled-Tail-Ref	chr14	41183134	41183134	T	A	Sftpd	c.-2A>T		splice_region_variant	LOW	121	0	0.009038	35	9	0.29	6.22741
Aplan-11-3658-BM_vs_Aplan-11th-Exp-Donor-BM-plus-Pooled-Tail-Ref	chr14	54638361	54638361	G	C	Cdh24	c.750C>G	p.Ser250Arg	missense_variant	MODERATE	103	0	0.011	32	10	0.333	6.78565
Aplan-11-3658-BM_vs_Aplan-11th-Exp-Donor-BM-plus-Pooled-Tail-Ref	chr14	55864999	55864999	G	C	Nynrin	c.2124G>C	p.Gln708His	missense_variant	MODERATE	142	0	0.008214	44	8	0.214	5.23576
Aplan-11-3658-BM_vs_Aplan-11th-Exp-Donor-BM-plus-Pooled-Tail-Ref	chr14	58893845	58893845	G	C	Fgf9-1700129C05Rik	n.58893845G>C		intergenic_region	MODIFIER	133	0	0.00879	62	18	0.286	6.66498
Aplan-11-3658-BM_vs_Aplan-11th-Exp-Donor-BM-plus-Pooled-Tail-Ref	chr14	62420188	62420188	G	C	Gucy1b2	c.590C>G	p.Pro197Arg	missense_variant	MODERATE	79	0	0.016	39	19	0.456	6.11804
Aplan-11-3658-BM_vs_Aplan-11th-Exp-Donor-BM-plus-Pooled-Tail-Ref	chr14	66169271	66169271	G	C	Ptk2b	c.2011C>G	p.Arg671Gly	missense_variant	MODERATE	221	0	0.005914	31	11	0.357	7.01917
Aplan-11-3658-BM_vs_Aplan-11th-Exp-Donor-BM-plus-Pooled-Tail-Ref	chr14	66169342	66169342	G	C	Ptk2b	c.1940C>G	p.Pro647Arg	missense_variant	MODERATE	174	0	0.006661	30	10	0.31	7.0379
Aplan-11-3658-BM_vs_Aplan-11th-Exp-Donor-BM-plus-Pooled-Tail-Ref	chr15	76057453	76057453	G	C	Scrib	c.3495C>G	p.Ser1165Arg	missense_variant	MODERATE	113	0	0.01	30	13	0.46	6.43005
Aplan-11-3658-BM_vs_Aplan-11th-Exp-Donor-BM-plus-Pooled-Tail-Ref	chr15	76183133	76183133	C	G	Plec	c.4338G>C	p.Lys1446Asn	missense_variant	MODERATE	216	0	0.00497	46	9	0.217	7.10255
Aplan-11-3658-BM_vs_Aplan-11th-Exp-Donor-BM-plus-Pooled-Tail-Ref	chr15	76633868	76633868	C	T	Tonsl	c.1813G>A	p.Ala605Thr	missense_variant	MODERATE	204	0	0.005333	32	11	0.333	6.62429
Aplan-11-3658-BM_vs_Aplan-11th-Exp-Donor-BM-plus-Pooled-Tail-Ref	chr15	84198598	84198598	C	G	Samm50	c.259C>G	p.Arg87Gly	missense_variant	MODERATE	274	0	0.004747	49	14	0.27	7.05435
Aplan-11-3658-BM_vs_Aplan-11th-Exp-Donor-BM-plus-Pooled-Tail-Ref	chr15	89067886	89067886	C	G	Panx2	c.555C>G	p.Pro185Pro	synonymous_variant	LOW	86	0	0.012	24	6	0.28	4.20176
Aplan-11-3658-BM_vs_Aplan-11th-Exp-Donor-BM-plus-Pooled-Tail-Ref	chr15	91412220	91412220	G	A	Slc2a13	c.893-3C>T		splice_region_variant&intron_variant	LOW	112	0	0.011	43	33	0.738	6.02622
Aplan-11-3658-BM_vs_Aplan-11th-Exp-Donor-BM-plus-Pooled-Tail-Ref	chr15	91870453	91870453	G	C	Muc19	c.53-19G>C		intron_variant	MODIFIER	220	0	0.005901	104	33	0.357	6.29942
Aplan-11-3658-BM_vs_Aplan-11th-Exp-Donor-BM-plus-Pooled-Tail-Ref	chr15	98168344	98168344	C	G	Ccdc184	c.29C>G	p.Thr10Ser	missense_variant	MODERATE	71	0	0.014	23	6	0.304	3.90665
Aplan-11-3658-BM_vs_Aplan-11th-Exp-Donor-BM-plus-Pooled-Tail-Ref	chr15	100401307	100401307	C	G	Slc11a2	c.1308G>C	p.Thr436Thr	synonymous_variant	LOW	88	0	0.013	38	20	0.5	6.18818
Aplan-11-3658-BM_vs_Aplan-11th-Exp-Donor-BM-plus-Pooled-Tail-Ref	chr15	100401647	100401647	C	G	Slc11a2	c.1102G>C	p.Gly368Arg	missense_variant	MODERATE	101	0	0.012	40	17	0.414	7.22806
Aplan-11-3658-BM_vs_Aplan-11th-Exp-Donor-BM-plus-Pooled-Tail-Ref	chr15	101039603	101039603	C	G	Scn8a	c.4852C>G	p.Arg1618Gly	missense_variant	MODERATE	196	0	0.006085	53	15	0.306	6.10031
Aplan-11-3658-BM_vs_Aplan-11th-Exp-Donor-BM-plus-Pooled-Tail-Ref	chr16	9669784	9669784	C	G	Grin2a	c.1249G>C	p.Val417Leu	missense_variant	MODERATE	208	0	0.005893	51	19	0.372	6.84557
Aplan-11-3658-BM_vs_Aplan-11th-Exp-Donor-BM-plus-Pooled-Tail-Ref	chr16	13384278	13384278	C	G	Mkl2	c.437C>G	p.Ala146Gly	missense_variant	MODERATE	53	0	0.022	29	10	0.362	5.02859
Aplan-11-3658-BM_vs_Aplan-11th-Exp-Donor-BM-plus-Pooled-Tail-Ref	chr16	20523465	20523465	C	G	Dvl3	c.287C>G	p.Pro96Arg	missense_variant	MODERATE	93	0	0.012	25	9	0.333	6.64111
Aplan-11-3658-BM_vs_Aplan-11th-Exp-Donor-BM-plus-Pooled-Tail-Ref	chr16	21470130	21470130	G	C	Vps8	c.1232G>C	p.Arg411Pro	missense_variant	MODERATE	72	0	0.016	28	9	0.333	5.43998
Aplan-11-3658-BM_vs_Aplan-11th-Exp-Donor-BM-plus-Pooled-Tail-Ref	chr16	55905701	55905701	C	G	Cep97	c.2038G>C	p.Glu680Gln	missense_variant	MODERATE	146	0	0.008192	47	12	0.29	6.18063
Aplan-11-3658-BM_vs_Aplan-11th-Exp-Donor-BM-plus-Pooled-Tail-Ref	chr16	91818467	91818467	C	G	Itsn1	c.1099C>G	p.Arg367Gly	missense_variant	MODERATE	49	0	0.025	25	8	0.287	4.1441
Aplan-11-3658-BM_vs_Aplan-11th-Exp-Donor-BM-plus-Pooled-Tail-Ref	chr16	94659560	94659560	C	G	Dyrk1a	c.74C>G	p.Ala25Gly	missense_variant	MODERATE	119	0	0.01	65	23	0.38	6.02973
Aplan-11-3658-BM_vs_Aplan-11th-Exp-Donor-BM-plus-Pooled-Tail-Ref	chr17	3533187	3533187	G	C	Cldn20	c.634G>C	p.Ala212Pro	missense_variant	MODERATE	132	0	0.009173	61	10	0.204	5.23775
Aplan-11-3658-BM_vs_Aplan-11th-Exp-Donor-BM-plus-Pooled-Tail-Ref	chr17	24594337	24594337	C	G	Pkd1	c.11932C>G	p.Arg3978Gly	missense_variant	MODERATE	276	0	0.004279	31	8	0.31	6.38616
Aplan-11-3658-BM_vs_Aplan-11th-Exp-Donor-BM-plus-Pooled-Tail-Ref	chr17	25842414	25842414	C	T	Rhot2	c.281G>A	p.Arg94Gln	missense_variant	MODERATE	172	4	0.029	29	13	0.423	6.22075
Aplan-11-3658-BM_vs_Aplan-11th-Exp-Donor-BM-plus-Pooled-Tail-Ref	chr17	27116069	27116069	C	G	Itpr3	c.6556C>G	p.Arg2186Gly	missense_variant	MODERATE	126	0	0.008838	39	10	0.257	6.69101
Aplan-11-3658-BM_vs_Aplan-11th-Exp-Donor-BM-plus-Pooled-Tail-Ref	chr17	27768163	27768163	C	G	D17Wsu92e	c.588G>C	p.Thr196Thr	synonymous_variant	LOW	95	0	0.012	69	20	0.286	6.73225
Aplan-11-3658-BM_vs_Aplan-11th-Exp-Donor-BM-plus-Pooled-Tail-Ref	chr17	28810609	28810609	C	G	Brpf3	c.1542C>G	p.Asn514Lys	missense_variant	MODERATE	118	0	0.011	40	7	0.228	4.35911
Aplan-11-3658-BM_vs_Aplan-11th-Exp-Donor-BM-plus-Pooled-Tail-Ref	chr17	44724748	44724748	G	C	Runx2	c.598C>G	p.Arg200Gly	missense_variant	MODERATE	117	0	0.011	47	10	0.209	5.75297
Aplan-11-3658-BM_vs_Aplan-11th-Exp-Donor-BM-plus-Pooled-Tail-Ref	chr17	66689416	66689416	C	G	Ptprm	c.3675G>C	p.Pro1225Pro	synonymous_variant	LOW	90	0	0.014	34	11	0.384	6.77166
Aplan-11-3658-BM_vs_Aplan-11th-Exp-Donor-BM-plus-Pooled-Tail-Ref	chr18	3325440	3325440	C	G	Crem	c.83G>C	p.Arg28Pro	missense_variant	MODERATE	119	0	0.01	52	15	0.29	6.77148
Aplan-11-3658-BM_vs_Aplan-11th-Exp-Donor-BM-plus-Pooled-Tail-Ref	chr18	7000730	7000730	C	G	Mkx	c.211G>C	p.Val71Leu	missense_variant	MODERATE	115	1	0.011	28	6	0.24	3.67171
Aplan-11-3658-BM_vs_Aplan-11th-Exp-Donor-BM-plus-Pooled-Tail-Ref	chr18	33824474	33824474	C	G	Epb41l4a	c.1487G>C	p.Arg496Pro	missense_variant	MODERATE	188	0	0.006341	62	15	0.283	6.48586
Aplan-11-3658-BM_vs_Aplan-11th-Exp-Donor-BM-plus-Pooled-Tail-Ref	chr18	37303017	37303017	G	A	Pcdhb3	c.2035G>A	p.Asp679Asn	missense_variant	MODERATE	438	0	0.002592	174	68	0.4	5.81699
Aplan-11-3658-BM_vs_Aplan-11th-Exp-Donor-BM-plus-Pooled-Tail-Ref	chr18	37707360	37707360	C	G	Pcdhga6	c.132C>G	p.Phe44Leu	missense_variant	MODERATE	314	0	0.00356	67	32	0.462	6.67295
Aplan-11-3658-BM_vs_Aplan-11th-Exp-Donor-BM-plus-Pooled-Tail-Ref	chr18	37752135	37752135	C	G	Pcdhgb7	c.357C>G	p.Val119Val	synonymous_variant	LOW	211	0	0.005364	69	21	0.275	6.51145
Aplan-11-3658-BM_vs_Aplan-11th-Exp-Donor-BM-plus-Pooled-Tail-Ref	chr18	42688335	42688335	G	C	Ppp2r2b	c.766C>G	p.Arg256Gly	missense_variant	MODERATE	75	0	0.016	37	16	0.427	7.12405
Aplan-11-3658-BM_vs_Aplan-11th-Exp-Donor-BM-plus-Pooled-Tail-Ref	chr18	58673380	58673380	C	G	Isoc1	c.747+14C>G		intron_variant	MODIFIER	118	0	0.009821	48	22	0.455	6.25521
Aplan-11-3658-BM_vs_Aplan-11th-Exp-Donor-BM-plus-Pooled-Tail-Ref	chr18	68307620	68307620	C	G	Rnmt	c.379-26C>G		intron_variant	MODIFIER	229	0	0.005213	68	14	0.21	6.24768
Aplan-11-3658-BM_vs_Aplan-11th-Exp-Donor-BM-plus-Pooled-Tail-Ref	chr18	68307795	68307795	C	G	Rnmt	c.520+8C>G		splice_region_variant&intron_variant	LOW	202	0	0.005654	96	26	0.26	6.87872
Aplan-11-3658-BM_vs_Aplan-11th-Exp-Donor-BM-plus-Pooled-Tail-Ref	chr18	77404903	77404903	C	G	Loxhd1	c.4366C>G	p.Arg1456Gly	missense_variant	MODERATE	119	0	0.011	65	32	0.5	6.15457
Aplan-11-3658-BM_vs_Aplan-11th-Exp-Donor-BM-plus-Pooled-Tail-Ref	chr19	5476090	5476090	C	G	Efemp2	c.242C>G	p.Pro81Arg	missense_variant	MODERATE	85	0	0.014	42	17	0.414	6.16269
Aplan-11-3658-BM_vs_Aplan-11th-Exp-Donor-BM-plus-Pooled-Tail-Ref	chr19	7691166	7691166	C	G	Slc22a19	c.851G>C	p.Arg284Pro	missense_variant	MODERATE	153	0	0.007846	58	26	0.431	6.58023
Aplan-11-3658-BM_vs_Aplan-11th-Exp-Donor-BM-plus-Pooled-Tail-Ref	chr19	8803376	8803376	C	G	Zbtb3	c.352C>G	p.Arg118Gly	missense_variant	MODERATE	166	0	0.006924	43	15	0.333	6.38319
Aplan-11-3658-BM_vs_Aplan-11th-Exp-Donor-BM-plus-Pooled-Tail-Ref	chr19	26710476	26710476	C	G	Smarca2	c.3508C>G	p.Arg1170Gly	missense_variant	MODERATE	86	0	0.014	22	13	0.55	6.89303
Aplan-11-3658-BM_vs_Aplan-11th-Exp-Donor-BM-plus-Pooled-Tail-Ref	chr19	27323201	27323201	G	C	Kcnv2	c.451G>C	p.Glu151Gln	missense_variant	MODERATE	63	0	0.017	22	8	0.381	5.17753
Aplan-11-3658-BM_vs_Aplan-11th-Exp-Donor-BM-plus-Pooled-Tail-Ref	chr19	33823097	33823097	G	C	Lipo1-Lipf	n.33823097G>C		intergenic_region	MODIFIER	278	0	0.00415	96	49	0.466	6.24288
Aplan-11-3658-BM_vs_Aplan-11th-Exp-Donor-BM-plus-Pooled-Tail-Ref	chr19	43867531	43867531	G	C	Dnmbp	c.3056C>G	p.Pro1019Arg	missense_variant	MODERATE	100	0	0.012	29	13	0.482	6.12509
Aplan-11-3658-BM_vs_Aplan-11th-Exp-Donor-BM-plus-Pooled-Tail-Ref	chr19	46715213	46715213	G	C	As3mt	c.556G>C	p.Asp186His	missense_variant	MODERATE	212	0	0.005858	137	57	0.398	5.87962
Aplan-11-3658-BM_vs_Aplan-11th-Exp-Donor-BM-plus-Pooled-Tail-Ref	chr19	56335109	56335109	G	C	Nrap	c.4135C>G	p.Arg1379Gly	missense_variant	MODERATE	120	0	0.01	29	13	0.448	6.81948
Aplan-11-3658-BM_vs_Aplan-11th-Exp-Donor-BM-plus-Pooled-Tail-Ref	chrX	7753075	7753075	C	G	Mir684-1	n.-14C>G		upstream_gene_variant	MODIFIER	296	0	0.004043	113	53	0.458	6.23235
Aplan-11-3658-BM_vs_Aplan-11th-Exp-Donor-BM-plus-Pooled-Tail-Ref	chrX	7765585	7765585	C	G	Tfe3	c.195C>G	p.Tyr65*	stop_gained	HIGH	290	0	0.004606	71	29	0.424	6.77567
Aplan-11-3658-BM_vs_Aplan-11th-Exp-Donor-BM-plus-Pooled-Tail-Ref	chrX	7842680	7842680	C	G	Otud5	c.564C>G	p.Ile188Met	missense_variant	MODERATE	55	0	0.021	18	6	0.333	3.96237
Aplan-11-3658-BM_vs_Aplan-11th-Exp-Donor-BM-plus-Pooled-Tail-Ref	chrX	18146049	18146049	C	G	Dusp21	c.101C>G	p.Ala34Gly	missense_variant	MODERATE	270	0	0.004385	134	48	0.353	6.10331
Aplan-11-3658-BM_vs_Aplan-11th-Exp-Donor-BM-plus-Pooled-Tail-Ref	chrX	49470552	49470552	G	C	Arhgap36	c.-55G>C		5_prime_UTR_variant	MODIFIER	72	0	0.016	13	5	0.384	4.40632
Aplan-11-3658-BM_vs_Aplan-11th-Exp-Donor-BM-plus-Pooled-Tail-Ref	chrX	101214428	101214428	C	G	Snx12	c.359G>C	p.Arg120Thr	missense_variant	MODERATE	116	0	0.01	29	14	0.458	6.07717
Aplan-11-3658-BM_vs_Aplan-11th-Exp-Donor-BM-plus-Pooled-Tail-Ref	chrX	101670053	101670053	C	G	Ogt	c.1784C>G	p.Pro595Arg	missense_variant	MODERATE	239	0	0.00502	90	33	0.384	6.15624
Aplan-11-3658-BM_vs_Aplan-11th-Exp-Donor-BM-plus-Pooled-Tail-Ref	chrX	107171267	107171267	C	G	A630033H20Rik	c.232C>G	p.Arg78Gly	missense_variant	MODERATE	511	1	0.002411	193	75	0.392	6.02452
Aplan-11-3658-BM_vs_Aplan-11th-Exp-Donor-BM-plus-Pooled-Tail-Ref	chrX	120365154	120365154	G	C	Pcdh11x	c.325G>C	p.Glu109Gln	missense_variant	MODERATE	275	0	0.004254	111	42	0.409	6.19862
Aplan-11-3658-BM_vs_Aplan-11th-Exp-Donor-BM-plus-Pooled-Tail-Ref	chrX	150811943	150811943	C	G	Maged2	c.417G>C	p.Pro139Pro	synonymous_variant	LOW	183	0	0.006406	49	22	0.455	6.22445
Aplan-11-3660-BM_vs_Aplan-11th-Exp-Donor-BM-plus-Pooled-Tail-Ref	chr1	4347282	4347282	G	A	Rp1	c.3606C>T	p.Asp1202Asp	synonymous_variant	LOW	280	0	0.004148	131	70	0.539	5.70404
Aplan-11-3660-BM_vs_Aplan-11th-Exp-Donor-BM-plus-Pooled-Tail-Ref	chr1	37644586	37644586	G	C	2010300C02Rik	c.45C>G	p.Ala15Ala	synonymous_variant	LOW	234	1	0.005699	61	14	0.245	6.18741
Aplan-11-3660-BM_vs_Aplan-11th-Exp-Donor-BM-plus-Pooled-Tail-Ref	chr1	59215183	59215183	C	G	Als2	c.1014G>C	p.Ala338Ala	synonymous_variant	LOW	170	0	0.007397	79	15	0.206	6.30341
Aplan-11-3660-BM_vs_Aplan-11th-Exp-Donor-BM-plus-Pooled-Tail-Ref	chr1	93312922	93312922	C	G	Pask	c.3721G>C	p.Gly1241Arg	missense_variant	MODERATE	72	3	0.066	22	11	0.5	5.60015
Aplan-11-3660-BM_vs_Aplan-11th-Exp-Donor-BM-plus-Pooled-Tail-Ref	chr1	136845519	136845519	C	G	Nr5a2	c.1627G>C	p.Gly543Arg	missense_variant	MODERATE	245	0	0.005014	56	13	0.211	6.6512
Aplan-11-3660-BM_vs_Aplan-11th-Exp-Donor-BM-plus-Pooled-Tail-Ref	chr1	155928322	155928322	G	C	Cep350	c.3014C>G	p.Ala1005Gly	missense_variant	MODERATE	190	0	0.006119	117	41	0.363	5.88125
Aplan-11-3660-BM_vs_Aplan-11th-Exp-Donor-BM-plus-Pooled-Tail-Ref	chr2	13525641	13525641	G	C	Trdmt1	c.228C>G	p.Ser76Arg	missense_variant	MODERATE	139	0	0.008911	100	25	0.247	5.93378
Aplan-11-3660-BM_vs_Aplan-11th-Exp-Donor-BM-plus-Pooled-Tail-Ref	chr2	25504239	25504239	C	G	Fbxw5	c.1165C>G	p.Arg389Gly	missense_variant	MODERATE	100	0	0.012	30	11	0.372	7.72592
Aplan-11-3660-BM_vs_Aplan-11th-Exp-Donor-BM-plus-Pooled-Tail-Ref	chr2	31801261	31801261	C	G	Abl1	c.2791C>G	p.Gln931Glu	missense_variant	MODERATE	137	0	0.009346	30	8	0.28	6.33491
Aplan-11-3660-BM_vs_Aplan-11th-Exp-Donor-BM-plus-Pooled-Tail-Ref	chr2	60339474	60339474	G	C	Ly75	c.2199+679C>G		intron_variant	MODIFIER	89	0	0.015	47	16	0.289	6.58232
Aplan-11-3660-BM_vs_Aplan-11th-Exp-Donor-BM-plus-Pooled-Tail-Ref	chr2	76897624	76897624	G	C	Ttn	c.14205C>G	p.Thr4735Thr	synonymous_variant	LOW	138	0	0.008254	121	47	0.388	5.84633
Aplan-11-3660-BM_vs_Aplan-11th-Exp-Donor-BM-plus-Pooled-Tail-Ref	chr2	158127325	158127325	G	C	Tgm2	c.1129C>G	p.Arg377Gly	missense_variant	MODERATE	105	0	0.011	43	19	0.444	6.90914
Aplan-11-3660-BM_vs_Aplan-11th-Exp-Donor-BM-plus-Pooled-Tail-Ref	chr2	168570572	168570572	C	G	Nfatc2	c.1166+26G>C		intron_variant	MODIFIER	61	0	0.016	35	8	0.249	3.75082
Aplan-11-3660-BM_vs_Aplan-11th-Exp-Donor-BM-plus-Pooled-Tail-Ref	chr2	170420645	170420645	G	C	Bcas1	c.18C>G	p.Ser6Arg	missense_variant	MODERATE	193	0	0.006797	56	13	0.255	7.17789
Aplan-11-3660-BM_vs_Aplan-11th-Exp-Donor-BM-plus-Pooled-Tail-Ref	chr2	181715953	181715953	G	C	Oprl1	c.224+7G>C		splice_region_variant&intron_variant	LOW	87	0	0.014	25	11	0.44	6.25932
Aplan-11-3660-BM_vs_Aplan-11th-Exp-Donor-BM-plus-Pooled-Tail-Ref	chr2	181716576	181716576	G	C	Oprl1	c.224+630G>C		intron_variant	MODIFIER	68	0	0.018	30	9	0.31	5.04136
Aplan-11-3660-BM_vs_Aplan-11th-Exp-Donor-BM-plus-Pooled-Tail-Ref	chr3	54380487	54380487	C	G	Postn	c.2014+2881C>G		intron_variant	MODIFIER	225	0	0.005485	157	57	0.366	6.13658
Aplan-11-3660-BM_vs_Aplan-11th-Exp-Donor-BM-plus-Pooled-Tail-Ref	chr3	92968202	92968202	C	G	Lce3e	c.*167C>G		3_prime_UTR_variant	MODIFIER	188	0	0.0066	53	18	0.325	6.67926
Aplan-11-3660-BM_vs_Aplan-11th-Exp-Donor-BM-plus-Pooled-Tail-Ref	chr3	95734876	95734876	T	C	Ecm1	c.1396A>G	p.Ile466Val	missense_variant	MODERATE	352	24	0.065	29	29	0.964	6.42238
Aplan-11-3660-BM_vs_Aplan-11th-Exp-Donor-BM-plus-Pooled-Tail-Ref	chr3	104015643	104015643	C	G	Magi3	c.3757G>C	p.Asp1253His	missense_variant	MODERATE	310	0	0.00384	140	46	0.351	6.10532
Aplan-11-3660-BM_vs_Aplan-11th-Exp-Donor-BM-plus-Pooled-Tail-Ref	chr3	108087709	108087709	C	G	Ampd2	c.-2375G>C		upstream_gene_variant	MODIFIER	299	0	0.003647	99	31	0.311	6.76652
Aplan-11-3660-BM_vs_Aplan-11th-Exp-Donor-BM-plus-Pooled-Tail-Ref	chr3	108356194	108356194	C	G	Sort1	c.2344-37C>G		intron_variant	MODIFIER	105	0	0.012	59	18	0.327	7.16644
Aplan-11-3660-BM_vs_Aplan-11th-Exp-Donor-BM-plus-Pooled-Tail-Ref	chr3	141211365	141211365	C	G	Pdha2	c.381G>C	p.Thr127Thr	synonymous_variant	LOW	157	0	0.007104	54	23	0.426	6.52011
Aplan-11-3660-BM_vs_Aplan-11th-Exp-Donor-BM-plus-Pooled-Tail-Ref	chr3	154969211	154969211	C	G	Tnni3k	c.676G>C	p.Asp226His	missense_variant	MODERATE	118	0	0.01	47	18	0.385	6.36567
Aplan-11-3660-BM_vs_Aplan-11th-Exp-Donor-BM-plus-Pooled-Tail-Ref	chr4	43422571	43422571	C	G	Rusc2	c.2799C>G	p.Ile933Met	missense_variant	MODERATE	166	0	0.007194	43	12	0.308	7.03484
Aplan-11-3660-BM_vs_Aplan-11th-Exp-Donor-BM-plus-Pooled-Tail-Ref	chr4	43422580	43422580	C	G	Rusc2	c.2808C>G	p.Phe936Leu	missense_variant	MODERATE	167	0	0.007151	44	11	0.275	6.22547
Aplan-11-3660-BM_vs_Aplan-11th-Exp-Donor-BM-plus-Pooled-Tail-Ref	chr4	43938987	43938987	C	G	Reck	c.2352C>G	p.Tyr784*	stop_gained	HIGH	116	0	0.01	48	12	0.219	6.87574
Aplan-11-3660-BM_vs_Aplan-11th-Exp-Donor-BM-plus-Pooled-Tail-Ref	chr4	48422143	48422143	G	A	Invs	c.2774G>A	p.Trp925*	stop_gained	HIGH	48	0	0.024	27	6	0.238	2.83267
Aplan-11-3660-BM_vs_Aplan-11th-Exp-Donor-BM-plus-Pooled-Tail-Ref	chr4	62336478	62336478	C	G	Fkbp15	c.784G>C	p.Ala262Pro	missense_variant	MODERATE	187	0	0.006572	66	14	0.232	6.953
Aplan-11-3660-BM_vs_Aplan-11th-Exp-Donor-BM-plus-Pooled-Tail-Ref	chr4	65156541	65156541	C	G	Pappa	c.1331C>G	p.Ala444Gly	missense_variant	MODERATE	189	0	0.006164	95	22	0.208	6.83517
Aplan-11-3660-BM_vs_Aplan-11th-Exp-Donor-BM-plus-Pooled-Tail-Ref	chr4	95623977	95623977	C	G	Fggy	c.557+408C>G		intron_variant	MODIFIER	298	0	0.003908	214	48	0.233	5.74828
Aplan-11-3660-BM_vs_Aplan-11th-Exp-Donor-BM-plus-Pooled-Tail-Ref	chr4	126460330	126460330	G	C	Ago1	c.649+37C>G		intron_variant	MODIFIER	48	0	0.022	25	12	0.454	6.54845
Aplan-11-3660-BM_vs_Aplan-11th-Exp-Donor-BM-plus-Pooled-Tail-Ref	chr4	130730484	130730484	C	A	Pum1	c.1094C>A	p.Thr365Lys	missense_variant	MODERATE	148	0	0.007811	69	30	0.46	6.26209
Aplan-11-3660-BM_vs_Aplan-11th-Exp-Donor-BM-plus-Pooled-Tail-Ref	chr4	132493763	132493763	C	G	Sesn2	c.1396G>C	p.Ala466Pro	missense_variant	MODERATE	200	0	0.006479	55	13	0.261	7.40532
Aplan-11-3660-BM_vs_Aplan-11th-Exp-Donor-BM-plus-Pooled-Tail-Ref	chr4	139479504	139479504	G	A	Ubr4	c.14733G>A	p.Thr4911Thr	synonymous_variant	LOW	135	0	0.009428	47	21	0.439	6.48442
Aplan-11-3660-BM_vs_Aplan-11th-Exp-Donor-BM-plus-Pooled-Tail-Ref	chr4	143894187	143894187	G	A	Pramef6	c.*50C>T		downstream_gene_variant	MODIFIER	112	0	0.011	47	23	0.526	6.67491
Aplan-11-3660-BM_vs_Aplan-11th-Exp-Donor-BM-plus-Pooled-Tail-Ref	chr4	155289612	155289612	C	G	Prkcz	c.876+19G>C		intron_variant	MODIFIER	119	0	0.01	36	11	0.265	7.55605
Aplan-11-3660-BM_vs_Aplan-11th-Exp-Donor-BM-plus-Pooled-Tail-Ref	chr4	155901853	155901853	C	G	Acap3	c.863-25C>G		intron_variant	MODIFIER	118	0	0.009711	57	23	0.39	6.80254
Aplan-11-3660-BM_vs_Aplan-11th-Exp-Donor-BM-plus-Pooled-Tail-Ref	chr4	156034907	156034907	C	G	Ttll10	c.*6G>C		3_prime_UTR_variant	MODIFIER	69	0	0.019	17	8	0.5	6.33899
Aplan-11-3660-BM_vs_Aplan-11th-Exp-Donor-BM-plus-Pooled-Tail-Ref	chr5	52565863	52565863	G	C	Lgi2	c.188+55C>G		intron_variant	MODIFIER	55	0	0.023	17	5	0.357	3.35432
Aplan-11-3660-BM_vs_Aplan-11th-Exp-Donor-BM-plus-Pooled-Tail-Ref	chr5	64345441	64345441	C	G	Tbc1d1	c.3567+16C>G		intron_variant	MODIFIER	91	0	0.013	45	13	0.283	6.82128
Aplan-11-3660-BM_vs_Aplan-11th-Exp-Donor-BM-plus-Pooled-Tail-Ref	chr5	66026158	66026158	G	C	Rbm47	c.1101C>G	p.Ile367Met	missense_variant	MODERATE	122	0	0.009317	45	11	0.291	6.69611
Aplan-11-3660-BM_vs_Aplan-11th-Exp-Donor-BM-plus-Pooled-Tail-Ref	chr5	91952871	91952871	G	C	Rchy1	c.536+70C>G		intron_variant	MODIFIER	145	0	0.007801	59	16	0.269	6.21071
Aplan-11-3660-BM_vs_Aplan-11th-Exp-Donor-BM-plus-Pooled-Tail-Ref	chr5	92348052	92348052	G	C	Art3	c.-10+15070G>C		intron_variant	MODIFIER	104	0	0.01	60	22	0.375	6.43812
Aplan-11-3660-BM_vs_Aplan-11th-Exp-Donor-BM-plus-Pooled-Tail-Ref	chr5	101957413	101957413	G	C	Wdfy3	c.547C>G	p.Arg183Gly	missense_variant	MODERATE	103	0	0.012	35	11	0.3	7.13949
Aplan-11-3660-BM_vs_Aplan-11th-Exp-Donor-BM-plus-Pooled-Tail-Ref	chr5	118741907	118741907	C	G	Med13l	c.3063C>G	p.Ser1021Arg	missense_variant	MODERATE	127	0	0.00869	23	8	0.335	7.03028
Aplan-11-3660-BM_vs_Aplan-11th-Exp-Donor-BM-plus-Pooled-Tail-Ref	chr5	124624368	124624368	C	G	Tctn2	c.1654C>G	p.Arg552Gly	missense_variant	MODERATE	71	0	0.017	30	11	0.37	6.46382
Aplan-11-3660-BM_vs_Aplan-11th-Exp-Donor-BM-plus-Pooled-Tail-Ref	chr5	125429280	125429280	C	T	Dhx37	c.757G>A	p.Glu253Lys	missense_variant	MODERATE	133	0	0.009169	25	6	0.264	5.04467
Aplan-11-3660-BM_vs_Aplan-11th-Exp-Donor-BM-plus-Pooled-Tail-Ref	chr5	136836716	136836716	C	G	Col26a1	c.323G>C	p.Arg108Pro	missense_variant	MODERATE	123	1	0.011	54	11	0.227	5.04638
Aplan-11-3660-BM_vs_Aplan-11th-Exp-Donor-BM-plus-Pooled-Tail-Ref	chr5	142529925	142529925	C	G	Papolb	c.-39G>C		5_prime_UTR_variant	MODIFIER	144	0	0.007786	31	9	0.241	7.23226
Aplan-11-3660-BM_vs_Aplan-11th-Exp-Donor-BM-plus-Pooled-Tail-Ref	chr6	4539663	4539663	C	G	Col1a2	c.3930C>G	p.Gly1310Gly	synonymous_variant	LOW	117	0	0.01	50	11	0.244	6.13026
Aplan-11-3660-BM_vs_Aplan-11th-Exp-Donor-BM-plus-Pooled-Tail-Ref	chr6	38385445	38385445	G	C	Ttc26	c.154G>C	p.Val52Leu	missense_variant	MODERATE	185	0	0.006849	128	43	0.335	6.33993
Aplan-11-3660-BM_vs_Aplan-11th-Exp-Donor-BM-plus-Pooled-Tail-Ref	chr7	38447987	38447987	A	C	Pop4-Gm5591	n.38447987A>C		intergenic_region	MODIFIER	1429	47	0.032	320	132	0.377	5.73286
Aplan-11-3660-BM_vs_Aplan-11th-Exp-Donor-BM-plus-Pooled-Tail-Ref	chr7	44643499	44643499	C	G	Myh14	c.1139G>C	p.Arg380Pro	missense_variant	MODERATE	164	0	0.007657	59	22	0.36	6.70308
Aplan-11-3660-BM_vs_Aplan-11th-Exp-Donor-BM-plus-Pooled-Tail-Ref	chr7	72673516	72673516	C	T	Mctp2-Gm6567	n.72673516C>T		intergenic_region	MODIFIER	461	0	0.002534	194	54	0.285	5.90056
Aplan-11-3660-BM_vs_Aplan-11th-Exp-Donor-BM-plus-Pooled-Tail-Ref	chr7	83987298	83987298	G	C	Cemip	c.1086+40C>G		intron_variant	MODIFIER	253	0	0.004463	78	28	0.361	6.67926
Aplan-11-3660-BM_vs_Aplan-11th-Exp-Donor-BM-plus-Pooled-Tail-Ref	chr7	110926358	110926358	C	G	Mrvi1	c.586G>C	p.Gly196Arg	missense_variant	MODERATE	228	0	0.005865	43	20	0.438	6.60538
Aplan-11-3660-BM_vs_Aplan-11th-Exp-Donor-BM-plus-Pooled-Tail-Ref	chr7	126410355	126410355	G	C	Cd19	c.1447C>G	p.Arg483Gly	missense_variant	MODERATE	195	0	0.005933	123	32	0.245	6.48252
Aplan-11-3660-BM_vs_Aplan-11th-Exp-Donor-BM-plus-Pooled-Tail-Ref	chr8	70451977	70451977	G	C	Klhl26	c.1282C>G	p.Arg428Gly	missense_variant	MODERATE	65	0	0.016	16	9	0.555	7.35803
Aplan-11-3660-BM_vs_Aplan-11th-Exp-Donor-BM-plus-Pooled-Tail-Ref	chr8	70585864	70585864	C	G	Ell	c.1250C>G	p.Thr417Arg	missense_variant	MODERATE	226	1	0.005737	60	24	0.429	5.96925
Aplan-11-3660-BM_vs_Aplan-11th-Exp-Donor-BM-plus-Pooled-Tail-Ref	chr8	84816266	84816266	G	C	Dand5	c.*22C>G		3_prime_UTR_variant	MODIFIER	145	0	0.008722	49	20	0.386	6.00145
Aplan-11-3660-BM_vs_Aplan-11th-Exp-Donor-BM-plus-Pooled-Tail-Ref	chr8	95257874	95257874	C	G	Cngb1	c.2683G>C	p.Gly895Arg	missense_variant	MODERATE	79	0	0.015	42	18	0.424	6.37895
Aplan-11-3660-BM_vs_Aplan-11th-Exp-Donor-BM-plus-Pooled-Tail-Ref	chr8	105692905	105692905	G	C	Rltpr	c.520G>C	p.Gly174Arg	missense_variant	MODERATE	207	0	0.005887	66	26	0.378	6.45702
Aplan-11-3660-BM_vs_Aplan-11th-Exp-Donor-BM-plus-Pooled-Tail-Ref	chr8	107584151	107584151	C	T	Psmd7	c.438+22G>A		intron_variant	MODIFIER	420	11	0.034	74	32	0.434	5.94902
Aplan-11-3660-BM_vs_Aplan-11th-Exp-Donor-BM-plus-Pooled-Tail-Ref	chr8	109724350	109724350	G	C	Zfp821	c.974G>C	p.Arg325Pro	missense_variant	MODERATE	86	0	0.012	47	10	0.233	4.81402
Aplan-11-3660-BM_vs_Aplan-11th-Exp-Donor-BM-plus-Pooled-Tail-Ref	chr9	21210741	21210741	C	G	Pde4a	c.1932C>G	p.Ala644Ala	synonymous_variant	LOW	264	1	0.004967	45	20	0.459	6.66318
Aplan-11-3660-BM_vs_Aplan-11th-Exp-Donor-BM-plus-Pooled-Tail-Ref	chr9	44163512	44163512	G	C	Cbl	c.1252C>G	p.Arg418Gly	missense_variant	MODERATE	100	0	0.013	60	38	0.587	6.20091
Aplan-11-3660-BM_vs_Aplan-11th-Exp-Donor-BM-plus-Pooled-Tail-Ref	chr9	57334575	57334575	G	C	1700017B05Rik-4930430J02Rik	n.57334575G>C		intergenic_region	MODIFIER	215	1	0.005568	110	79	0.722	5.86494
Aplan-11-3660-BM_vs_Aplan-11th-Exp-Donor-BM-plus-Pooled-Tail-Ref	chr9	119072457	119072457	C	G	Vill	c.*1210C>G		downstream_gene_variant	MODIFIER	111	0	0.009862	52	9	0.2	4.68656
Aplan-11-3660-BM_vs_Aplan-11th-Exp-Donor-BM-plus-Pooled-Tail-Ref	chr10	13127229	13127229	C	G	Plagl1	c.240C>G	p.His80Gln	missense_variant	MODERATE	133	0	0.008981	78	24	0.313	5.96999
Aplan-11-3660-BM_vs_Aplan-11th-Exp-Donor-BM-plus-Pooled-Tail-Ref	chr10	18853702	18853702	G	A	Perp	c.355+25G>A		intron_variant	MODIFIER	136	9	0.073	33	32	0.932	6.32205
Aplan-11-3660-BM_vs_Aplan-11th-Exp-Donor-BM-plus-Pooled-Tail-Ref	chr10	34098871	34098871	C	G	Trappc3l	c.348C>G	p.Val116Val	synonymous_variant	LOW	127	0	0.011	77	25	0.339	6.23199
Aplan-11-3660-BM_vs_Aplan-11th-Exp-Donor-BM-plus-Pooled-Tail-Ref	chr10	75580596	75580596	G	C	Ggt1	c.823G>C	p.Val275Leu	missense_variant	MODERATE	69	0	0.016	18	5	0.333	3.63473
Aplan-11-3660-BM_vs_Aplan-11th-Exp-Donor-BM-plus-Pooled-Tail-Ref	chr10	80255014	80255014	C	G	Ndufs7	c.436C>G	p.Arg146Gly	missense_variant	MODERATE	416	0	0.003069	77	36	0.438	6.35004
Aplan-11-3660-BM_vs_Aplan-11th-Exp-Donor-BM-plus-Pooled-Tail-Ref	chr10	80293812	80293812	C	G	Rps15	c.260C>G	p.Pro87Arg	missense_variant	MODERATE	166	0	0.007241	82	32	0.371	5.95988
Aplan-11-3660-BM_vs_Aplan-11th-Exp-Donor-BM-plus-Pooled-Tail-Ref	chr10	80306309	80306309	G	C	Apc2	c.989G>C	p.Arg330Pro	missense_variant	MODERATE	80	0	0.014	22	5	0.285	3.50008
Aplan-11-3660-BM_vs_Aplan-11th-Exp-Donor-BM-plus-Pooled-Tail-Ref	chr10	81179213	81179213	C	G	Eef2	c.745C>G	p.Arg249Gly	missense_variant	MODERATE	259	1	0.008256	80	30	0.366	6.44935
Aplan-11-3660-BM_vs_Aplan-11th-Exp-Donor-BM-plus-Pooled-Tail-Ref	chr10	81181336	81181336	C	G	Eef2	c.2176C>G	p.Arg726Gly	missense_variant	MODERATE	110	0	0.01	48	17	0.381	6.60563
Aplan-11-3660-BM_vs_Aplan-11th-Exp-Donor-BM-plus-Pooled-Tail-Ref	chr10	81190205	81190205	C	G	Dapk3	c.380C>G	p.Ser127*	stop_gained	HIGH	144	0	0.007615	28	7	0.288	5.8192
Aplan-11-3660-BM_vs_Aplan-11th-Exp-Donor-BM-plus-Pooled-Tail-Ref	chr10	85981211	85981211	C	G	Bpifc	c.747+35G>C		intron_variant	MODIFIER	130	0	0.009347	73	29	0.379	5.99716
Aplan-11-3660-BM_vs_Aplan-11th-Exp-Donor-BM-plus-Pooled-Tail-Ref	chr10	128244259	128244259	C	G	Timeless	c.1276C>G	p.Arg426Gly	missense_variant	MODERATE	150	0	0.007723	57	16	0.328	6.5255
Aplan-11-3660-BM_vs_Aplan-11th-Exp-Donor-BM-plus-Pooled-Tail-Ref	chr11	4094345	4094345	C	T	Sec14l2	c.*3960G>A		downstream_gene_variant	MODIFIER	77	0	0.016	31	10	0.345	5.94105
Aplan-11-3660-BM_vs_Aplan-11th-Exp-Donor-BM-plus-Pooled-Tail-Ref	chr11	55164295	55164295	C	G	Slc36a2	c.933G>C	p.Leu311Leu	synonymous_variant	LOW	173	0	0.007094	66	26	0.386	6.42732
Aplan-11-3660-BM_vs_Aplan-11th-Exp-Donor-BM-plus-Pooled-Tail-Ref	chr11	58651605	58651605	G	A	Trim58	c.1390G>A	p.Ala464Thr	missense_variant	MODERATE	189	6	0.037	59	22	0.387	6.83836
Aplan-11-3660-BM_vs_Aplan-11th-Exp-Donor-BM-plus-Pooled-Tail-Ref	chr11	59080755	59080755	G	C	Obscn	c.6633C>G	p.Arg2211Arg	synonymous_variant	LOW	54	0	0.022	25	10	0.409	5.64418
Aplan-11-3660-BM_vs_Aplan-11th-Exp-Donor-BM-plus-Pooled-Tail-Ref	chr11	62592791	62592791	C	G	Trpv2	c.1453C>G	p.Arg485Gly	missense_variant	MODERATE	306	0	0.004115	53	13	0.266	6.3449
Aplan-11-3660-BM_vs_Aplan-11th-Exp-Donor-BM-plus-Pooled-Tail-Ref	chr11	69223409	69223409	G	C	Gucy2e	c.3150C>G	p.Gly1050Gly	splice_region_variant&synonymous_variant	LOW	133	0	0.008295	43	10	0.262	6.49957
Aplan-11-3660-BM_vs_Aplan-11th-Exp-Donor-BM-plus-Pooled-Tail-Ref	chr11	69880919	69880919	C	G	Kctd11	c.-709G>C		5_prime_UTR_variant	MODIFIER	126	0	0.009018	38	8	0.258	5.34859
Aplan-11-3660-BM_vs_Aplan-11th-Exp-Donor-BM-plus-Pooled-Tail-Ref	chr11	83746998	83746998	C	G	Wfdc21	c.-29C>G		5_prime_UTR_variant	MODIFIER	51	0	0.023	11	6	0.5	5.12405
Aplan-11-3660-BM_vs_Aplan-11th-Exp-Donor-BM-plus-Pooled-Tail-Ref	chr11	87729472	87729472	C	G	Rnf43	c.760C>G	p.Arg254Gly	missense_variant	MODERATE	119	0	0.01	14	5	0.357	5.20558
Aplan-11-3660-BM_vs_Aplan-11th-Exp-Donor-BM-plus-Pooled-Tail-Ref	chr11	87822215	87822215	C	G	Lpo	c.60G>C	p.Ala20Ala	synonymous_variant	LOW	75	0	0.017	49	19	0.39	7.11164
Aplan-11-3660-BM_vs_Aplan-11th-Exp-Donor-BM-plus-Pooled-Tail-Ref	chr11	94485267	94485267	G	C	Spata20	c.20C>G	p.Pro7Arg	missense_variant	MODERATE	343	0	0.003547	51	18	0.366	6.01505
Aplan-11-3660-BM_vs_Aplan-11th-Exp-Donor-BM-plus-Pooled-Tail-Ref	chr11	98913914	98913914	C	G	Cdc6	c.1070C>G	p.Pro357Arg	missense_variant	MODERATE	155	0	0.007685	50	13	0.282	6.80715
Aplan-11-3660-BM_vs_Aplan-11th-Exp-Donor-BM-plus-Pooled-Tail-Ref	chr11	100714505	100714505	C	G	Hspb9	c.*56C>G		3_prime_UTR_variant	MODIFIER	112	0	0.011	47	12	0.263	6.83355
Aplan-11-3660-BM_vs_Aplan-11th-Exp-Donor-BM-plus-Pooled-Tail-Ref	chr11	100749668	100749668	G	C	Kcnh4	c.1531C>G	p.Arg511Gly	missense_variant	MODERATE	109	0	0.011	26	7	0.333	5.32314
Aplan-11-3660-BM_vs_Aplan-11th-Exp-Donor-BM-plus-Pooled-Tail-Ref	chr11	106256955	106256955	G	C	Ftsj3	c.-1304C>G		upstream_gene_variant	MODIFIER	83	0	0.015	47	18	0.384	5.98074
Aplan-11-3660-BM_vs_Aplan-11th-Exp-Donor-BM-plus-Pooled-Tail-Ref	chr11	115864838	115864838	C	G	Llgl2-Recql5	n.115864838C>G		intergenic_region	MODIFIER	100	1	0.011	36	13	0.365	7.25758
Aplan-11-3660-BM_vs_Aplan-11th-Exp-Donor-BM-plus-Pooled-Tail-Ref	chr11	115887746	115887746	C	G	Recql5	c.*5312G>C		downstream_gene_variant	MODIFIER	330	0	0.003781	52	16	0.273	6.54984
Aplan-11-3660-BM_vs_Aplan-11th-Exp-Donor-BM-plus-Pooled-Tail-Ref	chr11	120374364	120374364	G	C	Faap100	c.1685C>G	p.Thr562Ser	missense_variant	MODERATE	85	0	0.013	32	11	0.333	6.82766
Aplan-11-3660-BM_vs_Aplan-11th-Exp-Donor-BM-plus-Pooled-Tail-Ref	chr11	120374537	120374537	G	C	Faap100	c.1512C>G	p.Ile504Met	missense_variant	MODERATE	106	0	0.011	45	13	0.286	7.43826
Aplan-11-3660-BM_vs_Aplan-11th-Exp-Donor-BM-plus-Pooled-Tail-Ref	chr11	120620588	120620588	G	C	Pcyt2	c.-2736C>G		upstream_gene_variant	MODIFIER	141	0	0.007703	61	15	0.284	6.72123
Aplan-11-3660-BM_vs_Aplan-11th-Exp-Donor-BM-plus-Pooled-Tail-Ref	chr11	121195190	121195190	C	G	Ogfod3	c.577G>C	p.Gly193Arg	missense_variant	MODERATE	136	0	0.008966	31	5	0.214	3.77794
Aplan-11-3660-BM_vs_Aplan-11th-Exp-Donor-BM-plus-Pooled-Tail-Ref	chr12	4198291	4198291	G	C	Adcy3	c.1356-4G>C		splice_region_variant&intron_variant	LOW	70	1	0.019	28	6	0.261	2.70075
Aplan-11-3660-BM_vs_Aplan-11th-Exp-Donor-BM-plus-Pooled-Tail-Ref	chr12	73546275	73546275	C	G	Tmem30b	c.65G>C	p.Arg22Pro	missense_variant	MODERATE	32	0	0.036	12	5	0.417	3.13711
Aplan-11-3660-BM_vs_Aplan-11th-Exp-Donor-BM-plus-Pooled-Tail-Ref	chr12	84016973	84016973	C	G	Acot1	c.854C>G	p.Thr285Ser	missense_variant	MODERATE	370	0	0.003255	187	61	0.336	5.91104
Aplan-11-3660-BM_vs_Aplan-11th-Exp-Donor-BM-plus-Pooled-Tail-Ref	chr12	112495042	112495042	C	G	A530016L24Rik	c.39C>G	p.His13Gln	missense_variant	MODERATE	149	0	0.008626	86	32	0.323	6.36749
Aplan-11-3660-BM_vs_Aplan-11th-Exp-Donor-BM-plus-Pooled-Tail-Ref	chr13	37930635	37930635	C	G	Rreb1	c.1969C>G	p.Arg657Gly	missense_variant	MODERATE	154	0	0.007353	67	30	0.426	6.71693
Aplan-11-3660-BM_vs_Aplan-11th-Exp-Donor-BM-plus-Pooled-Tail-Ref	chr13	55322231	55322231	C	G	Prelid1	c.42C>G	p.Ser14Ser	synonymous_variant	LOW	107	0	0.011	45	17	0.395	6.83017
Aplan-11-3660-BM_vs_Aplan-11th-Exp-Donor-BM-plus-Pooled-Tail-Ref	chr13	55421079	55421079	C	G	F12	c.869G>C	p.Cys290Ser	missense_variant	MODERATE	248	0	0.004892	43	17	0.41	7.0455
Aplan-11-3660-BM_vs_Aplan-11th-Exp-Donor-BM-plus-Pooled-Tail-Ref	chr13	59599715	59599715	C	G	Naa35	c.274-14C>G		intron_variant	MODIFIER	213	0	0.005708	134	39	0.293	6.07352
Aplan-11-3660-BM_vs_Aplan-11th-Exp-Donor-BM-plus-Pooled-Tail-Ref	chr14	55542449	55542449	C	G	Pck2	c.154C>G	p.Arg52Gly	missense_variant	MODERATE	210	0	0.005733	72	25	0.35	6.41943
Aplan-11-3660-BM_vs_Aplan-11th-Exp-Donor-BM-plus-Pooled-Tail-Ref	chr14	55829435	55829435	G	C	Nfatc4	c.1430G>C	p.Arg477Pro	missense_variant	MODERATE	102	0	0.012	38	12	0.312	7.43005
Aplan-11-3660-BM_vs_Aplan-11th-Exp-Donor-BM-plus-Pooled-Tail-Ref	chr14	119868991	119868991	C	G	Hs6st3	c.810C>G	p.Cys270Trp	missense_variant	MODERATE	115	0	0.009703	45	16	0.359	6.55385
Aplan-11-3660-BM_vs_Aplan-11th-Exp-Donor-BM-plus-Pooled-Tail-Ref	chr15	31027397	31027397	C	G	Ctnnd2	c.3481-15C>G		intron_variant	MODIFIER	144	0	0.008468	89	27	0.304	6.02438
Aplan-11-3660-BM_vs_Aplan-11th-Exp-Donor-BM-plus-Pooled-Tail-Ref	chr15	32628238	32628238	C	G	Sema5a	c.1696C>G	p.Arg566Gly	missense_variant	MODERATE	198	0	0.006243	60	19	0.312	6.8963
Aplan-11-3660-BM_vs_Aplan-11th-Exp-Donor-BM-plus-Pooled-Tail-Ref	chr15	71973665	71973665	C	G	Col22a1	c.1247G>C	p.Arg416Pro	missense_variant	MODERATE	160	0	0.007477	76	20	0.281	6.27685
Aplan-11-3660-BM_vs_Aplan-11th-Exp-Donor-BM-plus-Pooled-Tail-Ref	chr15	72590829	72590829	C	G	Trappc9	c.3039G>C	p.Val1013Val	synonymous_variant	LOW	96	0	0.012	31	7	0.214	4.53124
Aplan-11-3660-BM_vs_Aplan-11th-Exp-Donor-BM-plus-Pooled-Tail-Ref	chr15	80001841	80001841	C	G	Pdgfb	c.297G>C	p.Thr99Thr	synonymous_variant	LOW	29	0	0.036	13	7	0.539	4.1965
Aplan-11-3660-BM_vs_Aplan-11th-Exp-Donor-BM-plus-Pooled-Tail-Ref	chr15	91412220	91412220	G	A	Slc2a13	c.893-3C>T		splice_region_variant&intron_variant	LOW	112	0	0.011	48	45	0.93	6.18337
Aplan-11-3660-BM_vs_Aplan-11th-Exp-Donor-BM-plus-Pooled-Tail-Ref	chr15	101015872	101015872	C	G	Scn8a	c.3144C>G	p.Gly1048Gly	synonymous_variant	LOW	139	0	0.008474	58	12	0.226	6.75458
Aplan-11-3660-BM_vs_Aplan-11th-Exp-Donor-BM-plus-Pooled-Tail-Ref	chr15	102224367	102224367	C	G	Itgb7	c.509G>C	p.Arg170Pro	missense_variant	MODERATE	54	0	0.021	18	8	0.474	5.437
Aplan-11-3660-BM_vs_Aplan-11th-Exp-Donor-BM-plus-Pooled-Tail-Ref	chr16	5176551	5176551	G	C	Sec14l5	c.1208G>C	p.Arg403Pro	missense_variant	MODERATE	186	0	0.006531	49	12	0.238	6.90719
Aplan-11-3660-BM_vs_Aplan-11th-Exp-Donor-BM-plus-Pooled-Tail-Ref	chr16	30957754	30957754	G	C	Mir1195	n.30-37151C>G		intron_variant	MODIFIER	77	0	0.016	18	5	0.315	3.8301
Aplan-11-3660-BM_vs_Aplan-11th-Exp-Donor-BM-plus-Pooled-Tail-Ref	chr16	45593287	45593287	C	G	Slc9c1	c.2809-32C>G		intron_variant	MODIFIER	99	0	0.012	59	16	0.276	7.47644
Aplan-11-3660-BM_vs_Aplan-11th-Exp-Donor-BM-plus-Pooled-Tail-Ref	chr17	20114067	20114067	G	A	Vmn2r104-Fpr-rs6	n.20114067G>A		intergenic_region	MODIFIER	618	0	0.001978	235	84	0.344	5.6774
Aplan-11-3660-BM_vs_Aplan-11th-Exp-Donor-BM-plus-Pooled-Tail-Ref	chr17	25842414	25842414	C	T	Rhot2	c.281G>A	p.Arg94Gln	missense_variant	MODERATE	172	4	0.029	45	18	0.447	6.40766
Aplan-11-3660-BM_vs_Aplan-11th-Exp-Donor-BM-plus-Pooled-Tail-Ref	chr17	35471115	35471115	G	C	H2-Q10	c.619+14G>C		intron_variant	MODIFIER	146	0	0.007833	59	18	0.291	6.13957
Aplan-11-3660-BM_vs_Aplan-11th-Exp-Donor-BM-plus-Pooled-Tail-Ref	chr17	78546345	78546345	G	C	Vit	c.53-34G>C		intron_variant	MODIFIER	152	0	0.008113	77	14	0.203	6.99694
Aplan-11-3660-BM_vs_Aplan-11th-Exp-Donor-BM-plus-Pooled-Tail-Ref	chr18	34221525	34221525	C	G	Apc	c.-19+249C>G		intron_variant	MODIFIER	203	1	0.006161	43	19	0.427	6.08633
Aplan-11-3660-BM_vs_Aplan-11th-Exp-Donor-BM-plus-Pooled-Tail-Ref	chr18	61757690	61757690	G	T	Afap1l1	c.191C>A	p.Ser64*	stop_gained	HIGH	57	0	0.02	35	12	0.355	5.6383
Aplan-11-3660-BM_vs_Aplan-11th-Exp-Donor-BM-plus-Pooled-Tail-Ref	chr18	75521697	75521697	C	G	Ctif	c.757G>C	p.Gly253Arg	missense_variant	MODERATE	442	0	0.002828	56	23	0.36	6.17031
Aplan-11-3660-BM_vs_Aplan-11th-Exp-Donor-BM-plus-Pooled-Tail-Ref	chr18	77779247	77779247	C	G	Atp5a1	c.799+20C>G		intron_variant	MODIFIER	79	0	0.015	44	10	0.21	4.78147
Aplan-11-3660-BM_vs_Aplan-11th-Exp-Donor-BM-plus-Pooled-Tail-Ref	chr18	78027199	78027199	C	G	Epg5	c.6746-58C>G		intron_variant	MODIFIER	124	0	0.009607	63	17	0.27	7.07772
Aplan-11-3660-BM_vs_Aplan-11th-Exp-Donor-BM-plus-Pooled-Tail-Ref	chr19	5089778	5089778	C	G	Yif1a	c.250C>G	p.Arg84Gly	missense_variant	MODERATE	204	1	0.005992	98	31	0.342	6.67302
Aplan-11-3660-BM_vs_Aplan-11th-Exp-Donor-BM-plus-Pooled-Tail-Ref	chr19	6250573	6250573	C	G	Atg2a	c.2202-23C>G		intron_variant	MODIFIER	118	0	0.00875	50	15	0.318	6.93078
Aplan-11-3660-BM_vs_Aplan-11th-Exp-Donor-BM-plus-Pooled-Tail-Ref	chr19	44338942	44338942	C	G	Scd4	c.456C>G	p.Arg152Arg	synonymous_variant	LOW	46	2	0.02	75	18	0.286	2.31365
Aplan-11-3660-BM_vs_Aplan-11th-Exp-Donor-BM-plus-Pooled-Tail-Ref	chr19	45877952	45877952	C	G	9130011E15Rik	c.1781+8000G>C		intron_variant	MODIFIER	726	0	0.001648	378	132	0.353	5.91514
Aplan-11-3660-BM_vs_Aplan-11th-Exp-Donor-BM-plus-Pooled-Tail-Ref	chr19	47074916	47074916	C	G	Taf5	c.904C>G	p.Arg302Gly	missense_variant	MODERATE	173	0	0.006912	93	29	0.329	6.53532
Aplan-11-3660-BM_vs_Aplan-11th-Exp-Donor-BM-plus-Pooled-Tail-Ref	chr19	60779564	60779564	G	C	Eif3a	c.542-7C>G		splice_region_variant&intron_variant	LOW	109	0	0.01	33	8	0.29	5.38308
Aplan-11-3660-BM_vs_Aplan-11th-Exp-Donor-BM-plus-Pooled-Tail-Ref	chrX	101222293	101222293	G	C	Snx12	c.134C>G	p.Ala45Gly	missense_variant	MODERATE	197	0	0.0061	25	10	0.349	6.48634
Aplan-11-3660-BM_vs_Aplan-11th-Exp-Donor-BM-plus-Pooled-Tail-Ref	chrX	134593629	134593629	C	A	Gla	c.645+5G>T		splice_region_variant&intron_variant	LOW	88	0	0.014	34	12	0.402	7.37422
Aplan-11-3660-BM_vs_Aplan-11th-Exp-Donor-BM-plus-Pooled-Tail-Ref	chrX	169978540	169978540	G	A	Mid1	c.864+1511G>A		intron_variant	MODIFIER	33	2	0.085	10	9	0.836	6.03448
Aplan-11-3662-Thy_vs_Aplan-11-3662-Liver	chr7	19396946	19396946	C	G	Klc3	c.705G>C	p.Glu235Asp	missense_variant	MODERATE	24	0	0.05	15	5	0.308	2.28268
Aplan-11-3664-Thy_vs_Aplan-11-3664-Tail	chrM	12984	12984	G	C				intergenic_region	MODIFIER	2270	6	0.0009881	4173	993	0.238	5.26113
Aplan-11-3664-Thy_vs_Aplan-11-3664-Tail	chr1	4923961	4923961	C	A	Rgs20	c.497G>T	p.Arg166Leu	missense_variant	MODERATE	16	0	0.065	25	15	0.542	4.26578
Aplan-11-3664-Thy_vs_Aplan-11-3664-Tail	chr1	34192282	34192282	C	G	Dst	c.9489C>G	p.Ser3163Ser	synonymous_variant	LOW	54	0	0.02	58	30	0.5	6.00326
Aplan-11-3664-Thy_vs_Aplan-11-3664-Tail	chr1	36174257	36174257	C	G	Uggt1	c.2563-47G>C		intron_variant	MODIFIER	65	1	0.036	84	38	0.463	5.84911
Aplan-11-3664-Thy_vs_Aplan-11-3664-Tail	chr1	37614649	37614649	C	G	2010300C02Rik	c.3075G>C	p.Ala1025Ala	synonymous_variant	LOW	24	0	0.045	26	15	0.56	5.39648
Aplan-11-3664-Thy_vs_Aplan-11-3664-Tail	chr1	40014281	40014281	C	T	Map4k4	c.2782+58C>T		intron_variant	MODIFIER	71	0	0.015	72	32	0.477	5.79823
Aplan-11-3664-Thy_vs_Aplan-11-3664-Tail	chr1	40718784	40718784	G	C	Slc9a2	c.482G>C	p.Arg161Pro	missense_variant	MODERATE	110	2	0.022	148	61	0.415	6.08348
Aplan-11-3664-Thy_vs_Aplan-11-3664-Tail	chr1	46225792	46225792	C	G	Dnah7b	c.6445C>G	p.Arg2149Gly	missense_variant	MODERATE	100	0	0.012	122	50	0.416	6.15052
Aplan-11-3664-Thy_vs_Aplan-11-3664-Tail	chr1	46595133	46595133	C	G	Dnah7c	c.3271C>G	p.Arg1091Gly	missense_variant&splice_region_variant	MODERATE	71	1	0.03	117	51	0.42	6.25881
Aplan-11-3664-Thy_vs_Aplan-11-3664-Tail	chr1	53891145	53891145	C	G	Hecw2	c.3134G>C	p.Arg1045Pro	missense_variant	MODERATE	47	0	0.022	55	30	0.533	5.99083
Aplan-11-3664-Thy_vs_Aplan-11-3664-Tail	chr1	58262544	58262544	G	C	Aox4	c.3295-21G>C		intron_variant	MODIFIER	43	0	0.029	77	35	0.471	6.31946
Aplan-11-3664-Thy_vs_Aplan-11-3664-Tail	chr1	58354517	58354517	C	G	Aox2	c.3816+19C>G		intron_variant	MODIFIER	49	0	0.025	52	27	0.491	6.1018
Aplan-11-3664-Thy_vs_Aplan-11-3664-Tail	chr1	74425634	74425634	C	G	Vil1	c.1439C>G	p.Thr480Arg	missense_variant	MODERATE	29	0	0.042	42	21	0.528	5.7591
Aplan-11-3664-Thy_vs_Aplan-11-3664-Tail	chr1	74426595	74426595	C	G	Vil1	c.1544C>G	p.Thr515Arg	missense_variant	MODERATE	31	0	0.037	56	24	0.445	5.54134
Aplan-11-3664-Thy_vs_Aplan-11-3664-Tail	chr1	74432304	74432304	C	G	Vil1	c.2243C>G	p.Pro748Arg	missense_variant	MODERATE	26	0	0.045	52	26	0.514	5.77179
Aplan-11-3664-Thy_vs_Aplan-11-3664-Tail	chr1	78967807	78967807	C	G	Kcne4-Scg2	n.78967807C>G		intergenic_region	MODIFIER	85	0	0.013	157	62	0.413	5.94767
Aplan-11-3664-Thy_vs_Aplan-11-3664-Tail	chr1	81336575	81336575	G	C	Nyap2-Mir6344	n.81336575G>C		intergenic_region	MODIFIER	70	0	0.016	94	19	0.218	4.66446
Aplan-11-3664-Thy_vs_Aplan-11-3664-Tail	chr1	84445490	84445490	G	C	Dner	c.1391C>G	p.Thr464Arg	missense_variant	MODERATE	25	0	0.053	36	8	0.206	1.782
Aplan-11-3664-Thy_vs_Aplan-11-3664-Tail	chr1	91432851	91432851	G	A	Per2	c.1578C>T	p.His526His	synonymous_variant	LOW	77	0	0.016	90	39	0.408	5.99075
Aplan-11-3664-Thy_vs_Aplan-11-3664-Tail	chr1	92870887	92870887	G	C	Ankmy1	c.2881C>G	p.Leu961Val	missense_variant	MODERATE	57	0	0.021	82	47	0.581	5.91274
Aplan-11-3664-Thy_vs_Aplan-11-3664-Tail	chr1	92870920	92870920	G	C	Ankmy1	c.2848C>G	p.Arg950Gly	missense_variant	MODERATE	55	0	0.02	64	40	0.64	5.76938
Aplan-11-3664-Thy_vs_Aplan-11-3664-Tail	chr1	92943838	92943838	G	C	Capn10	c.1157G>C	p.Arg386Pro	missense_variant	MODERATE	45	0	0.026	69	25	0.407	6.11412
Aplan-11-3664-Thy_vs_Aplan-11-3664-Tail	chr1	93039024	93039024	G	C	Kif1a	c.3595+11C>G		intron_variant	MODIFIER	43	0	0.025	70	46	0.654	5.88268
Aplan-11-3664-Thy_vs_Aplan-11-3664-Tail	chr1	93154550	93154550	G	C	2310007B03Rik	c.846C>G	p.Arg282Arg	synonymous_variant	LOW	13	0	0.081	24	10	0.4	2.17391
Aplan-11-3664-Thy_vs_Aplan-11-3664-Tail	chr1	96844554	96844554	C	G	Slco4c1	c.709G>C	p.Gly237Arg	missense_variant	MODERATE	55	0	0.02	85	52	0.614	6.02344
Aplan-11-3664-Thy_vs_Aplan-11-3664-Tail	chr1	96987907	96987907	G	C	Slco6b1	n.899C>G		non_coding_transcript_exon_variant	MODIFIER	106	0	0.012	120	47	0.401	5.99654
Aplan-11-3664-Thy_vs_Aplan-11-3664-Tail	chr1	127749118	127749118	G	C	Acmsd	c.379G>C	p.Glu127Gln	missense_variant	MODERATE	54	1	0.024	65	32	0.491	6.01292
Aplan-11-3664-Thy_vs_Aplan-11-3664-Tail	chr1	128348999	128348999	G	C	Mcm6	c.853C>G	p.Arg285Gly	missense_variant	MODERATE	37	0	0.032	77	16	0.206	2.89411
Aplan-11-3664-Thy_vs_Aplan-11-3664-Tail	chr1	131298475	131298475	G	C	Srgap2	c.2217C>G	p.Tyr739*	stop_gained	HIGH	18	0	0.067	53	19	0.4	2.76094
Aplan-11-3664-Thy_vs_Aplan-11-3664-Tail	chr1	135272464	135272464	G	C	Rnpep	c.752C>G	p.Ala251Gly	missense_variant	MODERATE	75	0	0.016	101	50	0.478	5.89171
Aplan-11-3664-Thy_vs_Aplan-11-3664-Tail	chr1	136159384	136159384	C	G	Kif21b	c.2598C>G	p.Ser866Ser	synonymous_variant	LOW	15	0	0.067	17	6	0.411	1.71715
Aplan-11-3664-Thy_vs_Aplan-11-3664-Tail	chr1	136162804	136162804	C	G	Kif21b	c.3429C>G	p.Ser1143Ser	synonymous_variant	LOW	17	0	0.059	48	23	0.502	3.67748
Aplan-11-3664-Thy_vs_Aplan-11-3664-Tail	chr1	139513111	139513111	C	G	F13b	c.1304C>G	p.Ser435Trp	missense_variant	MODERATE	112	0	0.01	165	36	0.215	6.06702
Aplan-11-3664-Thy_vs_Aplan-11-3664-Tail	chr1	150704205	150704205	C	G	Hmcn1	c.5780G>C	p.Arg1927Pro	missense_variant	MODERATE	98	1	0.026	79	38	0.5	6.02529
Aplan-11-3664-Thy_vs_Aplan-11-3664-Tail	chr1	150755403	150755403	C	G	Hmcn1	c.2663-20G>C		intron_variant	MODIFIER	65	0	0.017	71	30	0.459	6.01499
Aplan-11-3664-Thy_vs_Aplan-11-3664-Tail	chr1	153874468	153874468	G	C	Teddm1b	c.22G>C	p.Gly8Arg	missense_variant	MODERATE	79	0	0.014	103	35	0.341	5.93196
Aplan-11-3664-Thy_vs_Aplan-11-3664-Tail	chr1	158505449	158505449	G	C	Astn1	c.1100G>C	p.Arg367Pro	missense_variant	MODERATE	74	0	0.017	60	29	0.521	5.86479
Aplan-11-3664-Thy_vs_Aplan-11-3664-Tail	chr1	159874144	159874144	G	C	Tnr	c.1814G>C	p.Arg605Pro	missense_variant	MODERATE	50	0	0.023	77	32	0.404	6.34561
Aplan-11-3664-Thy_vs_Aplan-11-3664-Tail	chr1	160146306	160146306	C	G	Tnn	c.490G>C	p.Ala164Pro	missense_variant	MODERATE	14	0	0.077	11	8	0.637	3.81657
Aplan-11-3664-Thy_vs_Aplan-11-3664-Tail	chr1	160948357	160948357	C	G	Rc3h1	c.1153C>G	p.Arg385Gly	missense_variant	MODERATE	74	0	0.017	103	58	0.562	6.16742
Aplan-11-3664-Thy_vs_Aplan-11-3664-Tail	chr1	167632510	167632510	C	G	Rxrg	c.914-5C>G		splice_region_variant&intron_variant	LOW	30	1	0.071	28	15	0.545	4.78923
Aplan-11-3664-Thy_vs_Aplan-11-3664-Tail	chr1	168164600	168164600	C	G	Pbx1	c.1201-5776G>C		intron_variant	MODIFIER	40	0	0.03	50	27	0.559	6.41141
Aplan-11-3664-Thy_vs_Aplan-11-3664-Tail	chr1	171237176	171237176	G	C	Ndufs2	c.1080C>G	p.Asp360Glu	missense_variant	MODERATE	60	1	0.04	56	17	0.333	4.90372
Aplan-11-3664-Thy_vs_Aplan-11-3664-Tail	chr1	171257149	171257149	G	C	Adamts4	c.1899+19G>C		intron_variant	MODIFIER	24	0	0.048	23	6	0.26	2.02681
Aplan-11-3664-Thy_vs_Aplan-11-3664-Tail	chr1	171288944	171288944	G	C	Ufc1	c.451C>G	p.Pro151Ala	missense_variant	MODERATE	52	0	0.023	74	46	0.608	5.79015
Aplan-11-3664-Thy_vs_Aplan-11-3664-Tail	chr1	171415526	171415526	C	G	Usf1	c.30C>G	p.Thr10Thr	synonymous_variant	LOW	112	0	0.011	130	60	0.457	5.87562
Aplan-11-3664-Thy_vs_Aplan-11-3664-Tail	chr1	172054421	172054421	G	C	Nhlh1	c.-124C>G		5_prime_UTR_variant	MODIFIER	19	0	0.055	40	24	0.587	5.18699
Aplan-11-3664-Thy_vs_Aplan-11-3664-Tail	chr1	178916005	178916005	C	G	Kif26b	c.3665C>G	p.Ala1222Gly	missense_variant	MODERATE	48	1	0.045	50	23	0.463	6.05535
Aplan-11-3664-Thy_vs_Aplan-11-3664-Tail	chr1	180178531	180178531	G	C	Coq8a	c.646+46C>G		intron_variant	MODIFIER	13	0	0.068	27	14	0.504	2.96232
Aplan-11-3664-Thy_vs_Aplan-11-3664-Tail	chr1	180894426	180894426	G	C	Lefty2	c.497+45G>C		intron_variant	MODIFIER	29	0	0.034	42	22	0.503	6.21826
Aplan-11-3664-Thy_vs_Aplan-11-3664-Tail	chr1	187143031	187143031	C	T	Spata17	c.444-2535G>A		intron_variant	MODIFIER	41	0	0.028	82	29	0.35	5.73653
Aplan-11-3664-Thy_vs_Aplan-11-3664-Tail	chr1	187998078	187998078	C	A	Esrrg	c.56+26C>A		intron_variant	MODIFIER	58	0	0.022	94	39	0.443	6.03598
Aplan-11-3664-Thy_vs_Aplan-11-3664-Tail	chr1	193330894	193330894	G	C	Lamb3	c.1426G>C	p.Glu476Gln	missense_variant	MODERATE	23	0	0.045	42	18	0.438	4.04314
Aplan-11-3664-Thy_vs_Aplan-11-3664-Tail	chr1	193348190	193348190	G	C	Camk1g	c.1210C>G	p.Leu404Val	missense_variant	MODERATE	37	1	0.057	44	26	0.563	6.09455
Aplan-11-3664-Thy_vs_Aplan-11-3664-Tail	chr2	24650065	24650065	C	G	Cacna1b	c.4381G>C	p.Val1461Leu	missense_variant	MODERATE	30	0	0.039	50	31	0.599	6.74081
Aplan-11-3664-Thy_vs_Aplan-11-3664-Tail	chr2	24690889	24690889	C	G	Cacna1b	c.1975-31G>C		intron_variant	MODIFIER	56	0	0.021	61	23	0.392	6.00033
Aplan-11-3664-Thy_vs_Aplan-11-3664-Tail	chr2	25296884	25296884	G	C	Grin1	c.2164C>G	p.Arg722Gly	missense_variant	MODERATE	49	0	0.023	43	10	0.243	3.57528
Aplan-11-3664-Thy_vs_Aplan-11-3664-Tail	chr2	25956287	25956287	T	G	Camsap1	c.623A>C	p.Lys208Thr	missense_variant	MODERATE	90	0	0.013	135	66	0.467	5.92807
Aplan-11-3664-Thy_vs_Aplan-11-3664-Tail	chr2	26464814	26464814	C	G	Notch1	c.5600G>C	p.Arg1867Pro	missense_variant	MODERATE	65	0	0.019	97	35	0.395	5.96335
Aplan-11-3664-Thy_vs_Aplan-11-3664-Tail	chr2	26470286	26470286	G	C	Notch1	c.3631C>G	p.Arg1211Gly	missense_variant	MODERATE	28	0	0.042	35	20	0.571	6.07685
Aplan-11-3664-Thy_vs_Aplan-11-3664-Tail	chr2	26591383	26591383	G	C	Agpat2	c.*2204C>G		downstream_gene_variant	MODIFIER	20	0	0.052	27	12	0.458	3.37479
Aplan-11-3664-Thy_vs_Aplan-11-3664-Tail	chr2	26899897	26899897	G	C	Surf6	c.130C>G	p.Pro44Ala	missense_variant	MODERATE	35	0	0.036	56	23	0.391	5.64713
Aplan-11-3664-Thy_vs_Aplan-11-3664-Tail	chr2	27165866	27165866	G	C	Dbh	c.351G>C	p.Ala117Ala	splice_region_variant&synonymous_variant	LOW	14	0	0.061	28	16	0.571	3.71182
Aplan-11-3664-Thy_vs_Aplan-11-3664-Tail	chr2	30101784	30101784	G	C	Zer1	c.2062C>G	p.Arg688Gly	missense_variant	MODERATE	33	0	0.036	53	25	0.468	6.06371
Aplan-11-3664-Thy_vs_Aplan-11-3664-Tail	chr2	31378348	31378348	G	C	Ncs1-Ass1	n.31378348G>C		intergenic_region	MODIFIER	42	0	0.027	45	22	0.514	6.08408
Aplan-11-3664-Thy_vs_Aplan-11-3664-Tail	chr2	31977899	31977899	G	A	Nup214	c.377G>A	p.Arg126His	missense_variant	MODERATE	77	0	0.015	164	72	0.451	6.09221
Aplan-11-3664-Thy_vs_Aplan-11-3664-Tail	chr2	32692439	32692439	G	C	Mir8093	n.-4673C>G		upstream_gene_variant	MODIFIER	59	0	0.02	122	57	0.446	5.91361
Aplan-11-3664-Thy_vs_Aplan-11-3664-Tail	chr2	32976108	32976108	G	C	Slc2a8	c.870+29C>G		intron_variant	MODIFIER	32	0	0.031	40	19	0.488	5.89348
Aplan-11-3664-Thy_vs_Aplan-11-3664-Tail	chr2	33454837	33454837	G	C	Zbtb43	c.375C>G	p.Ser125Arg	missense_variant	MODERATE	58	0	0.019	83	43	0.507	5.73242
Aplan-11-3664-Thy_vs_Aplan-11-3664-Tail	chr2	37577727	37577727	G	C	Strbp	c.*6303C>G		3_prime_UTR_variant	MODIFIER	120	0	0.01	158	64	0.421	5.88188
Aplan-11-3664-Thy_vs_Aplan-11-3664-Tail	chr2	69679756	69679756	C	G	Klhl41	c.1635C>G	p.Tyr545*	stop_gained	HIGH	56	0	0.02	85	46	0.53	6.01021
Aplan-11-3664-Thy_vs_Aplan-11-3664-Tail	chr2	71276519	71276519	C	G	Slc25a12	c.1748G>C	p.Arg583Pro	missense_variant	MODERATE	82	0	0.014	90	35	0.403	6.06048
Aplan-11-3664-Thy_vs_Aplan-11-3664-Tail	chr2	72198780	72198780	G	C	Rapgef4	c.1249G>C	p.Glu417Gln	missense_variant	MODERATE	45	0	0.024	86	33	0.421	6.60495
Aplan-11-3664-Thy_vs_Aplan-11-3664-Tail	chr2	72198859	72198859	G	C	Rapgef4	c.1328G>C	p.Cys443Ser	missense_variant	MODERATE	39	0	0.028	63	29	0.473	5.93812
Aplan-11-3664-Thy_vs_Aplan-11-3664-Tail	chr2	78920005	78920005	G	C	Ube2e3	c.574G>C	p.Ala192Pro	missense_variant	MODERATE	81	0	0.015	109	45	0.383	6.19793
Aplan-11-3664-Thy_vs_Aplan-11-3664-Tail	chr2	82993806	82993806	G	C	Zfp804a-Zc3h15	n.82993806G>C		intergenic_region	MODIFIER	103	2	0.021	134	63	0.485	5.757
Aplan-11-3664-Thy_vs_Aplan-11-3664-Tail	chr2	86423514	86423514	C	G	Olfr1062	c.161G>C	p.Arg54Pro	missense_variant	MODERATE	151	0	0.007517	198	84	0.446	5.95427
Aplan-11-3664-Thy_vs_Aplan-11-3664-Tail	chr2	104192476	104192476	G	C	D430041D05Rik	c.3172C>G	p.Arg1058Gly	missense_variant	MODERATE	82	1	0.031	145	34	0.254	5.8521
Aplan-11-3664-Thy_vs_Aplan-11-3664-Tail	chr2	106866953	106866953	G	C	Mpped2	c.772G>C	p.Gly258Arg	missense_variant	MODERATE	49	0	0.024	86	38	0.426	6.12265
Aplan-11-3664-Thy_vs_Aplan-11-3664-Tail	chr2	116892198	116892198	G	C	Tmco5	c.799G>C	p.Asp267His	missense_variant	MODERATE	101	0	0.012	116	56	0.526	6.05277
Aplan-11-3664-Thy_vs_Aplan-11-3664-Tail	chr2	119749787	119749787	G	C	Itpka	c.912G>C	p.Ala304Ala	synonymous_variant	LOW	32	0	0.035	50	25	0.512	6.0753
Aplan-11-3664-Thy_vs_Aplan-11-3664-Tail	chr2	120303338	120303338	G	C	Pla2g4f	c.1581C>G	p.Tyr527*	stop_gained	HIGH	44	0	0.024	68	19	0.29	4.39865
Aplan-11-3664-Thy_vs_Aplan-11-3664-Tail	chr2	120699269	120699269	G	C	Haus2-Cdan1	n.120699269G>C		intergenic_region	MODIFIER	71	0	0.015	83	45	0.534	6.05554
Aplan-11-3664-Thy_vs_Aplan-11-3664-Tail	chr2	121208038	121208038	C	T	Trp53bp1	c.4318G>A	p.Val1440Met	missense_variant	MODERATE	43	1	0.05	94	47	0.513	5.74886
Aplan-11-3664-Thy_vs_Aplan-11-3664-Tail	chr2	121326895	121326895	G	C	Ppip5k1	c.3189C>G	p.Ala1063Ala	synonymous_variant	LOW	40	0	0.033	61	29	0.467	6.11989
Aplan-11-3664-Thy_vs_Aplan-11-3664-Tail	chr2	125365640	125365640	G	C	Fbn1	c.2932C>G	p.Arg978Gly	missense_variant	MODERATE	45	0	0.027	47	25	0.553	6.0131
Aplan-11-3664-Thy_vs_Aplan-11-3664-Tail	chr2	126579047	126579047	G	C	Slc27a2	c.1457G>C	p.Arg486Pro	missense_variant&splice_region_variant	MODERATE	50	0	0.023	76	29	0.4	5.73139
Aplan-11-3664-Thy_vs_Aplan-11-3664-Tail	chr2	127772117	127772117	G	C	Nphp1	c.617C>G	p.Pro206Arg	missense_variant	MODERATE	57	0	0.021	85	33	0.383	6.4204
Aplan-11-3664-Thy_vs_Aplan-11-3664-Tail	chr2	128627204	128627204	G	C	Anapc1	c.4716C>G	p.Tyr1572*	stop_gained	HIGH	47	0	0.026	71	30	0.425	6.21313
Aplan-11-3664-Thy_vs_Aplan-11-3664-Tail	chr2	128894937	128894937	G	C	Fbln7	c.950+33G>C		intron_variant	MODIFIER	28	0	0.036	27	15	0.56	5.83539
Aplan-11-3664-Thy_vs_Aplan-11-3664-Tail	chr2	130395876	130395876	G	C	Cpxm1	c.513C>G	p.Pro171Pro	synonymous_variant	LOW	62	0	0.019	42	24	0.583	6.29225
Aplan-11-3664-Thy_vs_Aplan-11-3664-Tail	chr2	130405837	130405837	G	C	1700020A23Rik	c.215G>C	p.Gly72Ala	missense_variant	MODERATE	30	0	0.033	51	24	0.463	5.7996
Aplan-11-3664-Thy_vs_Aplan-11-3664-Tail	chr2	130784453	130784453	G	C	4930402H24Rik	c.1071C>G	p.Asn357Lys	missense_variant	MODERATE	39	0	0.032	42	21	0.5	6.5912
Aplan-11-3664-Thy_vs_Aplan-11-3664-Tail	chr2	131172591	131172591	C	G	Cenpb	c.*5486G>C		downstream_gene_variant	MODIFIER	23	0	0.043	46	20	0.418	4.26223
Aplan-11-3664-Thy_vs_Aplan-11-3664-Tail	chr2	135346317	135346317	C	G	Plcb1	c.2329C>G	p.Arg777Gly	missense_variant	MODERATE	47	0	0.026	52	19	0.333	6.10936
Aplan-11-3664-Thy_vs_Aplan-11-3664-Tail	chr2	145860381	145860381	G	C	Rin2	c.861G>C	p.Thr287Thr	synonymous_variant	LOW	46	0	0.025	50	23	0.487	5.81632
Aplan-11-3664-Thy_vs_Aplan-11-3664-Tail	chr2	150768926	150768926	G	C	Entpd6	c.1156+5G>C		splice_region_variant&intron_variant	LOW	84	0	0.014	89	46	0.509	6.11588
Aplan-11-3664-Thy_vs_Aplan-11-3664-Tail	chr2	152005595	152005595	C	G	Slc52a3	c.622C>G	p.Arg208Gly	missense_variant	MODERATE	27	0	0.042	39	19	0.515	5.36097
Aplan-11-3664-Thy_vs_Aplan-11-3664-Tail	chr2	154624876	154624876	G	C	Zfp341	c.164G>C	p.Cys55Ser	missense_variant	MODERATE	24	0	0.046	32	18	0.536	5.3989
Aplan-11-3664-Thy_vs_Aplan-11-3664-Tail	chr2	155641571	155641571	G	C	Trpc4ap	c.1511+18C>G		intron_variant	MODIFIER	30	0	0.036	68	28	0.38	5.3013
Aplan-11-3664-Thy_vs_Aplan-11-3664-Tail	chr2	156144152	156144152	G	C	Nfs1	c.-12C>G		5_prime_UTR_variant	MODIFIER	10	0	0.083	12	7	0.5	2.27184
Aplan-11-3664-Thy_vs_Aplan-11-3664-Tail	chr2	156304784	156304784	C	G	Phf20	c.2860C>G	p.Arg954Gly	missense_variant	MODERATE	12	0	0.083	20	13	0.675	3.3503
Aplan-11-3664-Thy_vs_Aplan-11-3664-Tail	chr2	156879444	156879444	G	C	Sla2	c.273C>G	p.His91Gln	missense_variant&splice_region_variant	MODERATE	43	0	0.026	72	35	0.476	5.75511
Aplan-11-3664-Thy_vs_Aplan-11-3664-Tail	chr2	164779710	164779710	G	C	Tnnc2	c.-45C>G		5_prime_UTR_variant	MODIFIER	26	0	0.048	34	12	0.357	3.23174
Aplan-11-3664-Thy_vs_Aplan-11-3664-Tail	chr2	164899349	164899349	G	C	Zfp335	c.2161C>G	p.Arg721Gly	missense_variant	MODERATE	35	0	0.036	54	12	0.25	2.57674
Aplan-11-3664-Thy_vs_Aplan-11-3664-Tail	chr2	165763806	165763806	C	G	Eya2	c.1129C>G	p.Arg377Gly	missense_variant	MODERATE	28	0	0.04	50	23	0.479	5.39953
Aplan-11-3664-Thy_vs_Aplan-11-3664-Tail	chr2	165812731	165812731	G	C	Zmynd8	c.1920C>G	p.Pro640Pro	synonymous_variant	LOW	35	0	0.03	73	20	0.254	3.52406
Aplan-11-3664-Thy_vs_Aplan-11-3664-Tail	chr2	168504953	168504953	G	C	Nfatc2	c.2220C>G	p.Pro740Pro	synonymous_variant	LOW	24	0	0.042	24	12	0.516	4.10997
Aplan-11-3664-Thy_vs_Aplan-11-3664-Tail	chr2	170119076	170119076	G	C	Zfp217	c.1330C>G	p.Arg444Gly	missense_variant	MODERATE	32	0	0.033	57	33	0.571	6.21311
Aplan-11-3664-Thy_vs_Aplan-11-3664-Tail	chr2	173108220	173108220	G	C	Ctcfl	c.1143C>G	p.Asp381Glu	missense_variant	MODERATE	13	0	0.075	21	9	0.444	2.21234
Aplan-11-3664-Thy_vs_Aplan-11-3664-Tail	chr2	173117266	173117266	G	C	Ctcfl	c.666C>G	p.Leu222Leu	synonymous_variant	LOW	56	1	0.039	100	50	0.481	6.01752
Aplan-11-3664-Thy_vs_Aplan-11-3664-Tail	chr3	31227198	31227198	G	C	Slc7a14	c.962C>G	p.Pro321Arg	missense_variant	MODERATE	31	0	0.038	35	15	0.424	4.87869
Aplan-11-3664-Thy_vs_Aplan-11-3664-Tail	chr3	40699671	40699671	G	C	Intu	c.2592G>C	p.Ser864Ser	synonymous_variant	LOW	54	0	0.021	66	38	0.569	5.89592
Aplan-11-3664-Thy_vs_Aplan-11-3664-Tail	chr3	87083574	87083574	G	C	Kirrel	c.1940C>G	p.Pro647Arg	missense_variant	MODERATE	42	0	0.028	50	26	0.512	6.58792
Aplan-11-3664-Thy_vs_Aplan-11-3664-Tail	chr3	87207939	87207939	G	C	Kirrel-Fcrls	n.87207939G>C		intergenic_region	MODIFIER	108	0	0.011	158	71	0.438	5.92428
Aplan-11-3664-Thy_vs_Aplan-11-3664-Tail	chr3	87385079	87385079	C	G	Fcrl1	c.437C>G	p.Thr146Ser	missense_variant	MODERATE	60	0	0.019	93	51	0.54	5.85611
Aplan-11-3664-Thy_vs_Aplan-11-3664-Tail	chr3	87808725	87808725	C	G	Insrr	c.1726C>G	p.Arg576Gly	missense_variant	MODERATE	22	0	0.049	35	14	0.414	3.45123
Aplan-11-3664-Thy_vs_Aplan-11-3664-Tail	chr3	88072352	88072352	C	G	Ttc24	c.603G>C	p.Met201Ile	missense_variant	MODERATE	69	0	0.018	84	29	0.372	6.1867
Aplan-11-3664-Thy_vs_Aplan-11-3664-Tail	chr3	88162933	88162933	C	T	Mef2d	c.877-25C>T		intron_variant	MODIFIER	55	0	0.022	57	26	0.456	6.10468
Aplan-11-3664-Thy_vs_Aplan-11-3664-Tail	chr3	89340457	89340457	G	C	Adam15	c.2371C>G	p.Arg791Gly	missense_variant	MODERATE	38	0	0.03	45	31	0.676	6.01573
Aplan-11-3664-Thy_vs_Aplan-11-3664-Tail	chr3	89948471	89948471	C	G	Atp8b2	c.1369G>C	p.Val457Leu	missense_variant	MODERATE	52	0	0.024	74	31	0.4	6.35933
Aplan-11-3664-Thy_vs_Aplan-11-3664-Tail	chr3	90457425	90457425	C	G	Npr1	c.2132G>C	p.Arg711Pro	missense_variant	MODERATE	36	0	0.033	49	14	0.343	3.68086
Aplan-11-3664-Thy_vs_Aplan-11-3664-Tail	chr3	90727912	90727912	G	C	Pglyrp4	c.63G>C	p.Trp21Cys	missense_variant	MODERATE	83	0	0.015	126	63	0.514	5.88583
Aplan-11-3664-Thy_vs_Aplan-11-3664-Tail	chr3	94387470	94387470	G	C	Rorc	c.167G>C	p.Arg56Pro	missense_variant	MODERATE	16	0	0.067	25	12	0.524	3.01029
Aplan-11-3664-Thy_vs_Aplan-11-3664-Tail	chr3	95172632	95172632	C	G	Sema6c	c.2236C>G	p.Arg746Gly	missense_variant	MODERATE	10	0	0.1	19	8	0.412	1.57647
Aplan-11-3664-Thy_vs_Aplan-11-3664-Tail	chr3	108150997	108150997	C	G	Gpr61	c.347G>C	p.Arg116Pro	missense_variant	MODERATE	33	0	0.033	51	23	0.458	5.78558
Aplan-11-3664-Thy_vs_Aplan-11-3664-Tail	chr3	133367776	133367776	C	G	Ppa2	c.641-47C>G		intron_variant	MODIFIER	78	0	0.015	90	43	0.5	6.06603
Aplan-11-3664-Thy_vs_Aplan-11-3664-Tail	chr3	136877651	136877651	G	C	Ppp3ca	c.518G>C	p.Arg173Pro	missense_variant	MODERATE	61	0	0.02	57	28	0.52	6.24804
Aplan-11-3664-Thy_vs_Aplan-11-3664-Tail	chr3	146894334	146894334	C	G	Ttll7	c.26-30C>G		intron_variant	MODIFIER	65	0	0.017	86	32	0.375	5.86157
Aplan-11-3664-Thy_vs_Aplan-11-3664-Tail	chr3	153912915	153912915	G	C	Rabggtb	c.-856C>G		upstream_gene_variant	MODIFIER	12	0	0.091	21	7	0.316	1.49558
Aplan-11-3664-Thy_vs_Aplan-11-3664-Tail	chr3	158066154	158066154	C	T	Lrrc40	c.1745C>T	p.Ala582Val	missense_variant	MODERATE	100	1	0.027	97	52	0.492	5.99447
Aplan-11-3664-Thy_vs_Aplan-11-3664-Tail	chr4	11706139	11706139	C	G	Gem	c.226C>G	p.Arg76Gly	missense_variant	MODERATE	58	0	0.019	56	26	0.488	6.07989
Aplan-11-3664-Thy_vs_Aplan-11-3664-Tail	chr4	31985754	31985754	C	G	Map3k7	c.676C>G	p.Arg226Gly	missense_variant	MODERATE	37	0	0.031	66	29	0.451	6.43787
Aplan-11-3664-Thy_vs_Aplan-11-3664-Tail	chr4	32757921	32757921	C	G	Mdn1	c.14376+15C>G		intron_variant	MODIFIER	23	0	0.043	46	12	0.29	2.22454
Aplan-11-3664-Thy_vs_Aplan-11-3664-Tail	chr4	43930905	43930905	C	G	Reck	c.1905C>G	p.Cys635Trp	missense_variant	MODERATE	44	1	0.053	75	27	0.361	5.02234
Aplan-11-3664-Thy_vs_Aplan-11-3664-Tail	chr4	46007623	46007623	G	C	Tdrd7	c.1674G>C	p.Thr558Thr	synonymous_variant	LOW	46	2	0.049	38	23	0.563	6.36762
Aplan-11-3664-Thy_vs_Aplan-11-3664-Tail	chr4	57027661	57027661	G	C	Frrs1l-Epb41l4b	n.57027661G>C		intergenic_region	MODIFIER	106	0	0.012	139	61	0.456	5.93745
Aplan-11-3664-Thy_vs_Aplan-11-3664-Tail	chr4	57248699	57248699	G	C	Ptpn3	c.634C>G	p.Arg212Gly	missense_variant	MODERATE	74	0	0.018	96	48	0.481	5.98892
Aplan-11-3664-Thy_vs_Aplan-11-3664-Tail	chr4	57371441	57371441	G	C	1700042G15Rik-Palm2	n.57371441G>C		intergenic_region	MODIFIER	70	0	0.021	122	56	0.474	6.00346
Aplan-11-3664-Thy_vs_Aplan-11-3664-Tail	chr4	58084922	58084922	G	C	Svep1	c.5415C>G	p.Thr1805Thr	synonymous_variant	LOW	39	0	0.032	65	27	0.472	5.96589
Aplan-11-3664-Thy_vs_Aplan-11-3664-Tail	chr4	58327415	58327415	C	G	Musk	c.658+60C>G		intron_variant	MODIFIER	103	0	0.011	151	73	0.471	5.90145
Aplan-11-3664-Thy_vs_Aplan-11-3664-Tail	chr4	59752857	59752857	C	G	E130308A19Rik	n.59752857C>G		intragenic_variant	MODIFIER	44	0	0.028	74	30	0.384	6.33121
Aplan-11-3664-Thy_vs_Aplan-11-3664-Tail	chr4	59957789	59957789	G	C	Mup4	c.*20+56C>G		intron_variant	MODIFIER	180	0	0.006569	357	165	0.478	5.77228
Aplan-11-3664-Thy_vs_Aplan-11-3664-Tail	chr4	62690512	62690512	C	G	Rgs3	c.2208C>G	p.Gly736Gly	synonymous_variant	LOW	77	0	0.015	63	25	0.394	6.86662
Aplan-11-3664-Thy_vs_Aplan-11-3664-Tail	chr4	63115366	63115366	G	C	Zfp618	c.806-3183G>C		intron_variant	MODIFIER	38	0	0.029	57	25	0.442	6.40313
Aplan-11-3664-Thy_vs_Aplan-11-3664-Tail	chr4	74263013	74263013	G	C	Kdm4c	c.195+44G>C		intron_variant	MODIFIER	41	0	0.029	55	12	0.232	3.00298
Aplan-11-3664-Thy_vs_Aplan-11-3664-Tail	chr4	84276300	84276300	G	C	Bnc2	c.2586C>G	p.Leu862Leu	synonymous_variant	LOW	48	1	0.046	43	22	0.541	5.93544
Aplan-11-3664-Thy_vs_Aplan-11-3664-Tail	chr4	94849729	94849729	G	C	Tek	c.2015G>C	p.Arg672Pro	missense_variant	MODERATE	144	4	0.025	198	90	0.458	5.88264
Aplan-11-3664-Thy_vs_Aplan-11-3664-Tail	chr4	98505841	98505841	C	G	Inadl	c.2974+36C>G		intron_variant	MODIFIER	62	0	0.019	143	74	0.51	5.85861
Aplan-11-3664-Thy_vs_Aplan-11-3664-Tail	chr4	102968149	102968149	C	G	Sgip1	c.2378-22C>G		intron_variant	MODIFIER	67	0	0.018	77	38	0.459	5.96806
Aplan-11-3664-Thy_vs_Aplan-11-3664-Tail	chr4	103563930	103563930	C	G	Gm12718-Dab1	n.103563930C>G		intergenic_region	MODIFIER	17	0	0.053	21	12	0.565	3.68437
Aplan-11-3664-Thy_vs_Aplan-11-3664-Tail	chr4	107028208	107028208	C	G	Ssbp3	c.463C>G	p.Arg155Gly	missense_variant	MODERATE	89	1	0.027	99	41	0.411	5.98154
Aplan-11-3664-Thy_vs_Aplan-11-3664-Tail	chr4	107139709	107139709	C	G	Tceanc2	c.526G>C	p.Ala176Pro	missense_variant	MODERATE	41	0	0.026	57	30	0.51	5.87941
Aplan-11-3664-Thy_vs_Aplan-11-3664-Tail	chr4	107293887	107293887	C	G	Dio1	c.543G>C	p.Val181Val	synonymous_variant	LOW	51	0	0.023	78	39	0.516	5.86615
Aplan-11-3664-Thy_vs_Aplan-11-3664-Tail	chr4	107374188	107374188	C	G	Ndc1	c.325C>G	p.Arg109Gly	missense_variant	MODERATE	45	0	0.029	33	9	0.321	3.67472
Aplan-11-3664-Thy_vs_Aplan-11-3664-Tail	chr4	117066445	117066445	C	A	Eif2b3	c.856C>A	p.Arg286Arg	synonymous_variant	LOW	82	0	0.014	128	65	0.526	5.80964
Aplan-11-3664-Thy_vs_Aplan-11-3664-Tail	chr4	118529690	118529690	G	C	2610528J11Rik	c.231G>C	p.Pro77Pro	synonymous_variant	LOW	45	0	0.028	38	19	0.484	5.8072
Aplan-11-3664-Thy_vs_Aplan-11-3664-Tail	chr4	120122904	120122904	G	C	Hivep3	c.5138G>C	p.Arg1713Pro	missense_variant	MODERATE	25	0	0.04	27	11	0.423	3.53814
Aplan-11-3664-Thy_vs_Aplan-11-3664-Tail	chr4	123215945	123215945	C	G	Nt5c1a	c.836C>G	p.Ala279Gly	missense_variant	MODERATE	34	0	0.028	36	19	0.531	6.78341
Aplan-11-3664-Thy_vs_Aplan-11-3664-Tail	chr4	124857016	124857016	C	G	Maneal	c.946G>C	p.Gly316Arg	missense_variant	MODERATE	49	0	0.022	71	29	0.414	6.2402
Aplan-11-3664-Thy_vs_Aplan-11-3664-Tail	chr4	124920345	124920345	C	G	Cdca8	c.652G>C	p.Glu218Gln	missense_variant	MODERATE	29	1	0.038	40	8	0.225	1.16199
Aplan-11-3664-Thy_vs_Aplan-11-3664-Tail	chr4	126070274	126070274	C	G	Oscp1	c.113-3531C>G		intron_variant	MODIFIER	38	0	0.029	37	18	0.503	6.27083
Aplan-11-3664-Thy_vs_Aplan-11-3664-Tail	chr4	128900564	128900564	C	G	Trim62	c.523C>G	p.Arg175Gly	missense_variant	MODERATE	38	0	0.032	63	19	0.322	4.36262
Aplan-11-3664-Thy_vs_Aplan-11-3664-Tail	chr4	129182022	129182022	G	C	S100pbp	c.509C>G	p.Thr170Arg	missense_variant	MODERATE	77	0	0.013	105	45	0.439	6.27157
Aplan-11-3664-Thy_vs_Aplan-11-3664-Tail	chr4	129306584	129306584	G	C	Rbbp4	c.*3508C>G		downstream_gene_variant	MODIFIER	71	1	0.034	65	33	0.528	6.08274
Aplan-11-3664-Thy_vs_Aplan-11-3664-Tail	chr4	129471933	129471933	C	G	Bsdc1	c.419C>G	p.Pro140Arg	missense_variant	MODERATE	36	0	0.029	52	24	0.463	5.96854
Aplan-11-3664-Thy_vs_Aplan-11-3664-Tail	chr4	130265042	130265042	C	G	Serinc2	c.201+27G>C		intron_variant	MODIFIER	33	0	0.037	57	31	0.542	6.30944
Aplan-11-3664-Thy_vs_Aplan-11-3664-Tail	chr4	132310770	132310770	G	C	Snora16a	n.*1170G>C		downstream_gene_variant	MODIFIER	45	0	0.027	75	33	0.44	6.4458
Aplan-11-3664-Thy_vs_Aplan-11-3664-Tail	chr4	132499364	132499364	C	G	Sesn2	c.418G>C	p.Gly140Arg	missense_variant	MODERATE	19	0	0.053	51	23	0.396	3.88263
Aplan-11-3664-Thy_vs_Aplan-11-3664-Tail	chr4	132840596	132840596	G	C	Ppp1r8	c.117+48C>G		intron_variant	MODIFIER	63	0	0.02	98	41	0.41	6.22145
Aplan-11-3664-Thy_vs_Aplan-11-3664-Tail	chr4	132986253	132986253	C	G	Fgr	c.91C>G	p.Arg31Gly	missense_variant	MODERATE	30	0	0.04	43	27	0.588	6.59877
Aplan-11-3664-Thy_vs_Aplan-11-3664-Tail	chr4	132988719	132988719	C	A	Fgr	c.330C>A	p.Ser110Ser	synonymous_variant	LOW	29	0	0.04	46	20	0.457	5.09641
Aplan-11-3664-Thy_vs_Aplan-11-3664-Tail	chr4	133062817	133062817	G	C	Ahdc1	c.1368G>C	p.Pro456Pro	synonymous_variant	LOW	27	0	0.039	38	15	0.412	3.83457
Aplan-11-3664-Thy_vs_Aplan-11-3664-Tail	chr4	133210392	133210392	C	G	Gpr3	c.968G>C	p.Arg323Pro	missense_variant	MODERATE	53	0	0.025	48	18	0.41	6.70797
Aplan-11-3664-Thy_vs_Aplan-11-3664-Tail	chr4	133211145	133211145	C	G	Gpr3	c.215G>C	p.Arg72Pro	missense_variant	MODERATE	39	0	0.03	45	24	0.55	6.47193
Aplan-11-3664-Thy_vs_Aplan-11-3664-Tail	chr4	135916672	135916672	C	G	Cnr2	c.60C>G	p.Asn20Lys	missense_variant	MODERATE	31	0	0.036	38	18	0.444	5.59424
Aplan-11-3664-Thy_vs_Aplan-11-3664-Tail	chr4	135965388	135965388	C	G	Gale	c.50C>G	p.Thr17Arg	missense_variant	MODERATE	46	0	0.028	36	14	0.406	5.7628
Aplan-11-3664-Thy_vs_Aplan-11-3664-Tail	chr4	136940228	136940228	C	G	Epha8	c.941G>C	p.Arg314Pro	missense_variant	MODERATE	15	0	0.077	19	5	0.294	1.27917
Aplan-11-3664-Thy_vs_Aplan-11-3664-Tail	chr4	137515899	137515899	C	G	Hspg2	c.2235C>G	p.Cys745Trp	missense_variant	MODERATE	53	0	0.021	74	43	0.578	5.9467
Aplan-11-3664-Thy_vs_Aplan-11-3664-Tail	chr4	137520103	137520103	C	G	Hspg2	c.3545C>G	p.Thr1182Arg	missense_variant	MODERATE	38	0	0.03	37	22	0.604	6.51268
Aplan-11-3664-Thy_vs_Aplan-11-3664-Tail	chr4	137937322	137937322	C	G	Ece1	c.712-17C>G		intron_variant	MODIFIER	36	0	0.032	42	20	0.459	6.35115
Aplan-11-3664-Thy_vs_Aplan-11-3664-Tail	chr4	137962805	137962805	C	G	Ece1	c.2161C>G	p.Arg721Gly	missense_variant	MODERATE	25	0	0.047	49	15	0.342	2.84237
Aplan-11-3664-Thy_vs_Aplan-11-3664-Tail	chr4	139410524	139410524	C	G	Ubr4	c.3283C>G	p.Arg1095Gly	missense_variant	MODERATE	60	0	0.017	76	41	0.532	6.29203
Aplan-11-3664-Thy_vs_Aplan-11-3664-Tail	chr4	139615079	139615079	C	G	Iffo2	c.1433+18C>G		intron_variant	MODIFIER	25	0	0.041	31	9	0.25	2.53303
Aplan-11-3664-Thy_vs_Aplan-11-3664-Tail	chr4	141018678	141018678	G	C	Crocc	c.5621C>G	p.Thr1874Arg	missense_variant	MODERATE	25	0	0.048	26	10	0.429	3.17294
Aplan-11-3664-Thy_vs_Aplan-11-3664-Tail	chr4	141096959	141096959	C	G	Spata21	c.532C>G	p.Pro178Ala	missense_variant	MODERATE	13	0	0.077	22	13	0.588	3.18865
Aplan-11-3664-Thy_vs_Aplan-11-3664-Tail	chr4	141405341	141405341	G	C	Clcnkb	c.1776C>G	p.Gly592Gly	synonymous_variant	LOW	20	0	0.056	29	11	0.36	2.86103
Aplan-11-3664-Thy_vs_Aplan-11-3664-Tail	chr4	148464481	148464481	C	G	Mtor	c.1720C>G	p.Pro574Ala	missense_variant	MODERATE	35	0	0.032	66	32	0.529	6.71404
Aplan-11-3664-Thy_vs_Aplan-11-3664-Tail	chr4	148538482	148538482	C	G	Mtor	c.5930C>G	p.Thr1977Arg	missense_variant	MODERATE	48	0	0.02	74	39	0.515	6.04518
Aplan-11-3664-Thy_vs_Aplan-11-3664-Tail	chr4	150245270	150245270	C	G	Eno1	c.600C>G	p.Tyr200*	stop_gained	HIGH	81	0	0.015	91	32	0.378	6.01803
Aplan-11-3664-Thy_vs_Aplan-11-3664-Tail	chr4	152366299	152366299	C	G	Chd5	c.1940+41C>G		intron_variant	MODIFIER	44	0	0.026	49	10	0.204	2.87803
Aplan-11-3664-Thy_vs_Aplan-11-3664-Tail	chr4	155628839	155628839	C	G	Gm16023	n.-4084G>C		upstream_gene_variant	MODIFIER	37	1	0.063	56	24	0.426	5.11179
Aplan-11-3664-Thy_vs_Aplan-11-3664-Tail	chr4	156028508	156028508	C	G	Tnfrsf18	c.579C>G	p.Phe193Leu	missense_variant	MODERATE	54	0	0.022	88	33	0.368	6.08576
Aplan-11-3664-Thy_vs_Aplan-11-3664-Tail	chr4	156035755	156035755	C	G	Ttll10	c.1480G>C	p.Glu494Gln	missense_variant	MODERATE	58	0	0.023	84	38	0.438	6.22253
Aplan-11-3664-Thy_vs_Aplan-11-3664-Tail	chr5	7976830	7976830	C	T	Steap4	c.792C>T	p.Leu264Leu	synonymous_variant	LOW	89	0	0.013	122	51	0.421	5.86472
Aplan-11-3664-Thy_vs_Aplan-11-3664-Tail	chr5	8440771	8440771	C	G	Slc25a40	c.318C>G	p.Ser106Arg	missense_variant	MODERATE	52	0	0.022	93	44	0.438	5.87996
Aplan-11-3664-Thy_vs_Aplan-11-3664-Tail	chr5	8746582	8746582	G	C	Abcb1a	c.3551G>C	p.Arg1184Pro	missense_variant	MODERATE	109	0	0.011	174	92	0.547	5.96002
Aplan-11-3664-Thy_vs_Aplan-11-3664-Tail	chr5	12585187	12585187	G	C	Sema3d	c.2219G>C	p.Arg740Pro	missense_variant	MODERATE	73	2	0.03	95	44	0.464	5.83989
Aplan-11-3664-Thy_vs_Aplan-11-3664-Tail	chr5	13042699	13042699	G	C	Sema3d-Sema3a	n.13042699G>C		intergenic_region	MODIFIER	107	0	0.012	184	87	0.49	5.9009
Aplan-11-3664-Thy_vs_Aplan-11-3664-Tail	chr5	24443411	24443411	C	G	Fastk	c.539G>C	p.Arg180Pro	missense_variant	MODERATE	36	0	0.032	63	25	0.38	5.78382
Aplan-11-3664-Thy_vs_Aplan-11-3664-Tail	chr5	33026963	33026963	C	G	Ywhah	c.509C>G	p.Pro170Arg	missense_variant	MODERATE	53	0	0.021	117	60	0.515	5.77646
Aplan-11-3664-Thy_vs_Aplan-11-3664-Tail	chr5	34898809	34898809	C	G	Htt	c.7926C>G	p.Ala2642Ala	synonymous_variant	LOW	59	0	0.019	79	42	0.532	6.17028
Aplan-11-3664-Thy_vs_Aplan-11-3664-Tail	chr5	46414297	46414297	G	C	4930405L22Rik-Slit2	n.46414297G>C		intergenic_region	MODIFIER	87	0	0.014	109	51	0.489	5.92315
Aplan-11-3664-Thy_vs_Aplan-11-3664-Tail	chr5	48302946	48302946	G	C	Slit2	c.4369G>C	p.Gly1457Arg	missense_variant	MODERATE	26	0	0.04	36	12	0.343	3.14711
Aplan-11-3664-Thy_vs_Aplan-11-3664-Tail	chr5	65287917	65287917	G	C	Rfc1	c.1347C>G	p.Arg449Arg	synonymous_variant	LOW	50	0	0.022	70	16	0.207	3.80112
Aplan-11-3664-Thy_vs_Aplan-11-3664-Tail	chr5	66278713	66278713	G	C	Nsun7	c.927G>C	p.Ser309Ser	synonymous_variant	LOW	75	2	0.048	128	74	0.581	5.96503
Aplan-11-3664-Thy_vs_Aplan-11-3664-Tail	chr5	76542169	76542169	C	G	Exoc1	c.555C>G	p.Cys185Trp	missense_variant	MODERATE	31	1	0.071	54	26	0.461	5.15882
Aplan-11-3664-Thy_vs_Aplan-11-3664-Tail	chr5	87842851	87842851	C	G	Prr27	c.321C>G	p.Tyr107*	stop_gained	HIGH	132	0	0.008842	137	72	0.525	5.68902
Aplan-11-3664-Thy_vs_Aplan-11-3664-Tail	chr5	88498592	88498592	C	G	Enam	c.550-24C>G		intron_variant	MODIFIER	69	0	0.016	86	39	0.487	6.25823
Aplan-11-3664-Thy_vs_Aplan-11-3664-Tail	chr5	106902984	106902984	C	G	Hfm1	c.1093G>C	p.Gly365Arg	missense_variant	MODERATE	81	0	0.015	115	47	0.414	5.95042
Aplan-11-3664-Thy_vs_Aplan-11-3664-Tail	chr5	110378251	110378251	G	C	Fbrsl1	c.1326C>G	p.His442Gln	missense_variant	MODERATE	8	0	0.097	30	12	0.464	1.41434
Aplan-11-3664-Thy_vs_Aplan-11-3664-Tail	chr5	111224040	111224040	C	G	Ttc28	c.2354C>G	p.Pro785Arg	missense_variant	MODERATE	58	0	0.019	76	35	0.484	6.11094
Aplan-11-3664-Thy_vs_Aplan-11-3664-Tail	chr5	114198219	114198219	C	G	Acacb	c.1993C>G	p.Arg665Gly	missense_variant	MODERATE	18	0	0.059	36	16	0.464	3.39658
Aplan-11-3664-Thy_vs_Aplan-11-3664-Tail	chr5	114258498	114258498	C	G	Foxn4	c.913+10G>C		intron_variant	MODIFIER	17	0	0.071	27	18	0.667	5.30587
Aplan-11-3664-Thy_vs_Aplan-11-3664-Tail	chr5	115098160	115098160	C	G	Sppl3	c.*963C>G		3_prime_UTR_variant	MODIFIER	92	0	0.013	129	52	0.411	5.75289
Aplan-11-3664-Thy_vs_Aplan-11-3664-Tail	chr5	115613426	115613426	G	C	Gcn1l1	c.6065G>C	p.Arg2022Pro	missense_variant	MODERATE	14	0	0.075	29	5	0.207	0.807974
Aplan-11-3664-Thy_vs_Aplan-11-3664-Tail	chr5	121749223	121749223	C	G	Atxn2	c.955C>G	p.Arg319Gly	missense_variant	MODERATE	63	0	0.019	97	41	0.44	6.21148
Aplan-11-3664-Thy_vs_Aplan-11-3664-Tail	chr5	123878693	123878693	G	C	Hcar1	c.934C>G	p.Arg312Gly	missense_variant	MODERATE	50	0	0.022	79	24	0.341	5.59134
Aplan-11-3664-Thy_vs_Aplan-11-3664-Tail	chr5	124032080	124032080	C	G	Vps37b	c.111+22G>C		intron_variant	MODIFIER	18	0	0.067	28	15	0.551	4.09874
Aplan-11-3664-Thy_vs_Aplan-11-3664-Tail	chr5	124073717	124073717	G	C	Abcb9	c.1768C>G	p.Arg590Gly	missense_variant	MODERATE	31	0	0.036	44	18	0.421	4.85808
Aplan-11-3664-Thy_vs_Aplan-11-3664-Tail	chr5	124083667	124083667	G	C	Abcb9	c.643C>G	p.Gln215Glu	missense_variant	MODERATE	41	0	0.029	54	25	0.458	6.83929
Aplan-11-3664-Thy_vs_Aplan-11-3664-Tail	chr5	124821299	124821299	C	G	Dnah10	c.11315C>G	p.Ala3772Gly	missense_variant	MODERATE	49	0	0.023	82	30	0.386	6.10186
Aplan-11-3664-Thy_vs_Aplan-11-3664-Tail	chr5	129854823	129854823	C	G	Sumf2	c.541C>G	p.Arg181Gly	missense_variant	MODERATE	27	0	0.043	40	8	0.226	1.75505
Aplan-11-3664-Thy_vs_Aplan-11-3664-Tail	chr5	131445454	131445454	C	G	Auts2	c.2247G>C	p.Thr749Thr	synonymous_variant	LOW	59	0	0.02	79	38	0.472	5.72744
Aplan-11-3664-Thy_vs_Aplan-11-3664-Tail	chr5	134382826	134382826	C	G	Gtf2ird1	c.1921G>C	p.Glu641Gln	missense_variant	MODERATE	58	0	0.021	95	54	0.524	6.18082
Aplan-11-3664-Thy_vs_Aplan-11-3664-Tail	chr5	135888149	135888149	G	C	Hspb1	c.91G>C	p.Asp31His	missense_variant	MODERATE	25	0	0.043	34	24	0.667	6.34277
Aplan-11-3664-Thy_vs_Aplan-11-3664-Tail	chr5	137414315	137414315	C	G	Zan	c.9733G>C	p.Glu3245Gln	missense_variant	MODERATE	36	0	0.031	68	30	0.483	6.38544
Aplan-11-3664-Thy_vs_Aplan-11-3664-Tail	chr5	137634176	137634176	C	G	Lrch4	c.525C>G	p.Pro175Pro	synonymous_variant	LOW	32	0	0.035	54	30	0.524	6.00279
Aplan-11-3664-Thy_vs_Aplan-11-3664-Tail	chr5	137639118	137639118	C	G	Lrch4	c.1553-4C>G		splice_region_variant&intron_variant	LOW	59	0	0.018	95	39	0.383	5.96839
Aplan-11-3664-Thy_vs_Aplan-11-3664-Tail	chr5	137644135	137644135	C	G	Irs3	c.1040G>C	p.Arg347Thr	missense_variant	MODERATE	68	0	0.017	84	34	0.413	5.99409
Aplan-11-3664-Thy_vs_Aplan-11-3664-Tail	chr5	137644496	137644496	C	G	Irs3	c.679G>C	p.Ala227Pro	missense_variant	MODERATE	32	0	0.034	25	10	0.455	4.12093
Aplan-11-3664-Thy_vs_Aplan-11-3664-Tail	chr5	139762133	139762133	G	C	Ints1	c.3518C>G	p.Ser1173Trp	missense_variant&splice_region_variant	MODERATE	45	0	0.026	80	35	0.411	6.19217
Aplan-11-3664-Thy_vs_Aplan-11-3664-Tail	chr5	140341504	140341504	G	C	Snx8	c.*25C>G		3_prime_UTR_variant	MODIFIER	19	0	0.053	27	15	0.577	4.27408
Aplan-11-3664-Thy_vs_Aplan-11-3664-Tail	chr5	140430154	140430154	C	G	Eif3b	c.1227C>G	p.Cys409Trp	missense_variant	MODERATE	69	0	0.015	106	60	0.568	5.82222
Aplan-11-3664-Thy_vs_Aplan-11-3664-Tail	chr5	140523995	140523995	C	G	Chst12	c.376C>G	p.Gln126Glu	missense_variant	MODERATE	64	0	0.017	77	24	0.33	6.40772
Aplan-11-3664-Thy_vs_Aplan-11-3664-Tail	chr5	144806102	144806102	C	G	Trrap	c.4282C>G	p.Arg1428Gly	missense_variant	MODERATE	68	0	0.017	68	19	0.286	6.0532
Aplan-11-3664-Thy_vs_Aplan-11-3664-Tail	chr5	150066276	150066276	C	G	Rxfp2	c.1151C>G	p.Pro384Arg	missense_variant	MODERATE	96	0	0.013	158	84	0.522	5.97742
Aplan-11-3664-Thy_vs_Aplan-11-3664-Tail	chr6	4730061	4730061	G	C	Sgce	c.162C>G	p.Thr54Thr	synonymous_variant	LOW	63	0	0.019	86	49	0.571	5.95556
Aplan-11-3664-Thy_vs_Aplan-11-3664-Tail	chr6	12007794	12007794	G	C	Phf14	c.2633+688G>C		intron_variant	MODIFIER	40	0	0.029	75	15	0.2	2.94949
Aplan-11-3664-Thy_vs_Aplan-11-3664-Tail	chr6	17104754	17104754	C	A	Tes	c.1233C>A	p.Ser411Ser	synonymous_variant	LOW	63	0	0.019	85	43	0.486	6.00317
Aplan-11-3664-Thy_vs_Aplan-11-3664-Tail	chr6	18378438	18378438	G	C	Cttnbp2	c.4406-8C>G		splice_region_variant&intron_variant	LOW	59	0	0.021	114	21	0.2	3.95482
Aplan-11-3664-Thy_vs_Aplan-11-3664-Tail	chr6	29498824	29498824	C	G	Kcp	c.1074G>C	p.Pro358Pro	synonymous_variant	LOW	19	0	0.049	36	7	0.211	1.08461
Aplan-11-3664-Thy_vs_Aplan-11-3664-Tail	chr6	29993098	29993098	G	C	Smkr-ps	n.229G>C		non_coding_transcript_exon_variant	MODIFIER	22	0	0.056	47	18	0.395	3.50461
Aplan-11-3664-Thy_vs_Aplan-11-3664-Tail	chr6	32196270	32196270	G	C	Plxna4	c.3725C>G	p.Ala1242Gly	missense_variant	MODERATE	44	0	0.026	54	11	0.201	3.0349
Aplan-11-3664-Thy_vs_Aplan-11-3664-Tail	chr6	34783613	34783613	C	G	Agbl3	c.107C>G	p.Pro36Arg	missense_variant	MODERATE	35	0	0.033	51	13	0.232	3.22345
Aplan-11-3664-Thy_vs_Aplan-11-3664-Tail	chr6	34934171	34934171	G	C	Stra8	c.733G>C	p.Ala245Pro	missense_variant	MODERATE	62	0	0.018	70	34	0.464	6.01129
Aplan-11-3664-Thy_vs_Aplan-11-3664-Tail	chr6	43153680	43153680	T	C	Olfr237-ps1	c.374T>C	p.Ile125Thr	missense_variant	MODERATE	342	1	0.007205	428	218	0.51	5.54903
Aplan-11-3664-Thy_vs_Aplan-11-3664-Tail	chr6	47964447	47964447	C	G	Zfp956	c.*20C>G		3_prime_UTR_variant	MODIFIER	37	0	0.028	55	26	0.482	6.03968
Aplan-11-3664-Thy_vs_Aplan-11-3664-Tail	chr6	48457183	48457183	C	G	Sspo	c.2901+20C>G		intron_variant	MODIFIER	50	0	0.02	58	28	0.491	5.85816
Aplan-11-3664-Thy_vs_Aplan-11-3664-Tail	chr6	54177481	54177481	C	G	Chn2	c.88+3979C>G		intron_variant	MODIFIER	64	0	0.018	101	41	0.454	6.18339
Aplan-11-3664-Thy_vs_Aplan-11-3664-Tail	chr6	86392244	86392244	C	G	Pcyox1	c.599G>C	p.Arg200Pro	missense_variant	MODERATE	68	1	0.032	66	35	0.539	6.29476
Aplan-11-3664-Thy_vs_Aplan-11-3664-Tail	chr6	86628474	86628474	G	C	Asprv1	c.301G>C	p.Val101Leu	missense_variant	MODERATE	51	0	0.023	56	29	0.479	6.0542
Aplan-11-3664-Thy_vs_Aplan-11-3664-Tail	chr6	86682868	86682868	C	G	Snrnp27	c.143G>C	p.Arg48Pro	missense_variant	MODERATE	29	0	0.035	63	30	0.489	5.82129
Aplan-11-3664-Thy_vs_Aplan-11-3664-Tail	chr6	88843617	88843617	C	G	Podxl2	c.1300G>C	p.Gly434Arg	missense_variant	MODERATE	28	0	0.045	42	17	0.424	4.43672
Aplan-11-3664-Thy_vs_Aplan-11-3664-Tail	chr6	95586983	95586983	C	G	Suclg2	c.620G>C	p.Arg207Pro	missense_variant	MODERATE	71	0	0.017	103	41	0.429	5.86332
Aplan-11-3664-Thy_vs_Aplan-11-3664-Tail	chr6	124858761	124858761	G	C	Gpr162	c.1675C>G	p.Arg559Gly	missense_variant	MODERATE	27	0	0.038	48	24	0.488	5.43933
Aplan-11-3664-Thy_vs_Aplan-11-3664-Tail	chr6	124858800	124858800	G	C	Gpr162	c.1636C>G	p.Arg546Gly	missense_variant	MODERATE	40	0	0.029	68	14	0.212	2.74278
Aplan-11-3664-Thy_vs_Aplan-11-3664-Tail	chr6	124858901	124858901	G	C	Gpr162	c.1535C>G	p.Thr512Arg	missense_variant	MODERATE	41	0	0.028	55	10	0.204	2.35649
Aplan-11-3664-Thy_vs_Aplan-11-3664-Tail	chr6	124904806	124904806	G	C	Lag3	c.1407+32C>G		intron_variant	MODIFIER	41	0	0.026	51	20	0.439	5.96604
Aplan-11-3664-Thy_vs_Aplan-11-3664-Tail	chr6	124908642	124908642	G	C	Lag3	c.774C>G	p.Pro258Pro	synonymous_variant	LOW	24	0	0.045	49	21	0.449	4.26586
Aplan-11-3664-Thy_vs_Aplan-11-3664-Tail	chr6	124910838	124910838	G	C	Lag3	c.132C>G	p.Cys44Trp	missense_variant	MODERATE	45	0	0.025	81	19	0.233	3.86955
Aplan-11-3664-Thy_vs_Aplan-11-3664-Tail	chr6	125281098	125281098	C	G	Tuba3a	c.928G>C	p.Gly310Arg	missense_variant	MODERATE	118	0	0.01	165	86	0.541	6.045
Aplan-11-3664-Thy_vs_Aplan-11-3664-Tail	chr6	132847465	132847465	C	G	Tas2r123	c.324C>G	p.Leu108Leu	synonymous_variant	LOW	118	0	0.009158	170	75	0.441	5.92153
Aplan-11-3664-Thy_vs_Aplan-11-3664-Tail	chr6	135011646	135011646	C	G	Ddx47	c.5C>G	p.Ala2Gly	missense_variant	MODERATE	24	0	0.044	29	21	0.682	6.08374
Aplan-11-3664-Thy_vs_Aplan-11-3664-Tail	chr6	135152963	135152963	C	G	Hebp1	c.256G>C	p.Val86Leu	missense_variant	MODERATE	42	0	0.027	67	40	0.569	6.33838
Aplan-11-3664-Thy_vs_Aplan-11-3664-Tail	chr6	137430626	137430626	C	G	Ptpro	c.2778-46C>G		intron_variant	MODIFIER	105	0	0.012	116	52	0.446	5.91413
Aplan-11-3664-Thy_vs_Aplan-11-3664-Tail	chr6	145232194	145232194	C	G	Kras	c.351G>C	p.Lys117Asn	missense_variant	MODERATE	52	0	0.025	91	55	0.594	6.04756
Aplan-11-3664-Thy_vs_Aplan-11-3664-Tail	chr6	146345032	146345032	C	G	Itpr2	c.3462+25G>C		intron_variant	MODIFIER	58	0	0.02	88	40	0.444	5.9535
Aplan-11-3664-Thy_vs_Aplan-11-3664-Tail	chr6	149045004	149045004	C	G	Dennd5b	c.1108G>C	p.Val370Leu	missense_variant	MODERATE	37	1	0.056	59	33	0.551	6.25724
Aplan-11-3664-Thy_vs_Aplan-11-3664-Tail	chr7	3310869	3310869	G	C	Prkcg	c.431G>C	p.Arg144Pro	missense_variant	MODERATE	46	1	0.048	51	21	0.405	5.42604
Aplan-11-3664-Thy_vs_Aplan-11-3664-Tail	chr7	5008927	5008927	C	G	Fiz1	c.591G>C	p.Ala197Ala	synonymous_variant	LOW	21	0	0.048	43	29	0.667	6.44979
Aplan-11-3664-Thy_vs_Aplan-11-3664-Tail	chr7	6711277	6711277	C	G	Peg3	c.945G>C	p.Ser315Ser	synonymous_variant	LOW	111	0	0.01	142	52	0.394	6.22478
Aplan-11-3664-Thy_vs_Aplan-11-3664-Tail	chr7	9120483	9120483	G	C	Vmn2r38-Vmn2r37	n.9120483G>C		intergenic_region	MODIFIER	201	0	0.005774	239	106	0.453	5.68962
Aplan-11-3664-Thy_vs_Aplan-11-3664-Tail	chr7	12982208	12982208	C	G	Zfp446	c.1105C>G	p.Arg369Gly	missense_variant	MODERATE	40	0	0.03	51	30	0.575	6.58616
Aplan-11-3664-Thy_vs_Aplan-11-3664-Tail	chr7	16811652	16811652	C	G	Fkrp	c.284G>C	p.Arg95Pro	missense_variant	MODERATE	26	0	0.039	43	21	0.474	5.26744
Aplan-11-3664-Thy_vs_Aplan-11-3664-Tail	chr7	16833880	16833880	C	G	Strn4	c.1499C>G	p.Pro500Arg	missense_variant	MODERATE	42	0	0.029	51	20	0.432	6.0232
Aplan-11-3664-Thy_vs_Aplan-11-3664-Tail	chr7	16885206	16885206	C	G	Dact3	c.625C>G	p.Arg209Gly	missense_variant	MODERATE	15	0	0.071	38	17	0.429	2.99364
Aplan-11-3664-Thy_vs_Aplan-11-3664-Tail	chr7	19040603	19040603	C	G	Sympk	c.1304C>G	p.Thr435Ser	missense_variant	MODERATE	20	0	0.056	25	16	0.584	5.42408
Aplan-11-3664-Thy_vs_Aplan-11-3664-Tail	chr7	19264602	19264602	G	C	Vasp	c.178-32C>G		intron_variant	MODIFIER	52	0	0.023	77	43	0.546	6.45305
Aplan-11-3664-Thy_vs_Aplan-11-3664-Tail	chr7	19278035	19278035	G	C	Rtn2	c.-4797G>C		upstream_gene_variant	MODIFIER	41	0	0.027	59	23	0.386	6.02185
Aplan-11-3664-Thy_vs_Aplan-11-3664-Tail	chr7	19286863	19286863	G	C	Rtn2	c.260G>C	p.Arg87Pro	missense_variant	MODERATE	29	0	0.042	31	10	0.37	3.06857
Aplan-11-3664-Thy_vs_Aplan-11-3664-Tail	chr7	19373113	19373113	C	G	Ppp1r13l	c.1532C>G	p.Ala511Gly	missense_variant	MODERATE	41	1	0.057	52	26	0.452	6.39267
Aplan-11-3664-Thy_vs_Aplan-11-3664-Tail	chr7	19495245	19495245	C	G	Mark4-Bloc1s3	n.19495245C>G		intergenic_region	MODIFIER	30	0	0.035	48	20	0.405	5.02009
Aplan-11-3664-Thy_vs_Aplan-11-3664-Tail	chr7	19532752	19532752	C	G	Ppp1r37	c.1209G>C	p.Arg403Arg	synonymous_variant	LOW	14	0	0.077	26	13	0.522	2.96232
Aplan-11-3664-Thy_vs_Aplan-11-3664-Tail	chr7	19765489	19765489	C	G	Bcam	c.608G>C	p.Arg203Pro	missense_variant	MODERATE	24	0	0.045	34	23	0.657	6.57858
Aplan-11-3664-Thy_vs_Aplan-11-3664-Tail	chr7	19811572	19811572	C	G	Bcl3	c.632G>C	p.Arg211Pro	missense_variant	MODERATE	11	0	0.091	22	13	0.611	2.79595
Aplan-11-3664-Thy_vs_Aplan-11-3664-Tail	chr7	19812476	19812476	C	G	Bcl3	c.433G>C	p.Ala145Pro	missense_variant	MODERATE	48	0	0.027	63	38	0.556	6.21161
Aplan-11-3664-Thy_vs_Aplan-11-3664-Tail	chr7	19853623	19853623	C	G	Ceacam16	c.1219G>C	p.Val407Leu	missense_variant	MODERATE	20	0	0.052	26	12	0.465	3.43929
Aplan-11-3664-Thy_vs_Aplan-11-3664-Tail	chr7	25293409	25293409	C	G	Cic	c.7407C>G	p.Gly2469Gly	synonymous_variant	LOW	21	0	0.05	16	9	0.597	4.03641
Aplan-11-3664-Thy_vs_Aplan-11-3664-Tail	chr7	25714472	25714472	C	G	Ccdc97	c.783G>C	p.Ser261Ser	synonymous_variant	LOW	16	0	0.067	36	18	0.552	3.52163
Aplan-11-3664-Thy_vs_Aplan-11-3664-Tail	chr7	27279530	27279530	G	C	Numbl	c.1063G>C	p.Gly355Arg	missense_variant	MODERATE	24	0	0.053	40	8	0.212	1.68468
Aplan-11-3664-Thy_vs_Aplan-11-3664-Tail	chr7	28316269	28316269	C	G	Timm50	c.-4237G>C		upstream_gene_variant	MODIFIER	55	0	0.022	87	44	0.499	6.20922
Aplan-11-3664-Thy_vs_Aplan-11-3664-Tail	chr7	28466970	28466970	C	T	Lrfn1	c.1788C>T	p.Ser596Ser	synonymous_variant	LOW	35	0	0.03	38	19	0.514	5.87591
Aplan-11-3664-Thy_vs_Aplan-11-3664-Tail	chr7	28467184	28467184	C	G	Lrfn1	c.2002C>G	p.Arg668Gly	missense_variant	MODERATE	20	0	0.05	24	15	0.645	5.00875
Aplan-11-3664-Thy_vs_Aplan-11-3664-Tail	chr7	28747012	28747012	G	C	Sars2	c.588G>C	p.Pro196Pro	splice_region_variant&synonymous_variant	LOW	39	0	0.03	50	22	0.5	6.3586
Aplan-11-3664-Thy_vs_Aplan-11-3664-Tail	chr7	28797628	28797628	C	G	Rinl	c.1552C>G	p.Arg518Gly	missense_variant	MODERATE	58	0	0.022	80	43	0.534	6.16486
Aplan-11-3664-Thy_vs_Aplan-11-3664-Tail	chr7	28864867	28864867	C	G	Lgals7	c.43C>G	p.Arg15Gly	missense_variant	MODERATE	32	0	0.042	52	18	0.344	4.22997
Aplan-11-3664-Thy_vs_Aplan-11-3664-Tail	chr7	28897905	28897905	G	C	Actn4	c.1957C>G	p.Arg653Gly	missense_variant	MODERATE	39	0	0.029	50	22	0.512	6.3586
Aplan-11-3664-Thy_vs_Aplan-11-3664-Tail	chr7	29000292	29000292	C	G	Map4k1	c.1957C>G	p.Arg653Gly	missense_variant&splice_region_variant	MODERATE	39	1	0.055	57	29	0.5	6.63841
Aplan-11-3664-Thy_vs_Aplan-11-3664-Tail	chr7	29046987	29046987	C	G	Ryr1	c.11451+10G>C		intron_variant	MODIFIER	46	0	0.023	57	27	0.509	6.07368
Aplan-11-3664-Thy_vs_Aplan-11-3664-Tail	chr7	29064601	29064601	G	C	Ryr1	c.9303C>G	p.Ser3101Ser	synonymous_variant	LOW	13	0	0.083	10	5	0.5	2.12557
Aplan-11-3664-Thy_vs_Aplan-11-3664-Tail	chr7	29104893	29104893	C	G	Ryr1	c.1582+28G>C		intron_variant	MODIFIER	56	0	0.022	71	29	0.419	6.6302
Aplan-11-3664-Thy_vs_Aplan-11-3664-Tail	chr7	29145996	29145996	C	G	Rasgrp4	c.1143C>G	p.Ser381Arg	missense_variant	MODERATE	38	0	0.028	53	18	0.349	4.68834
Aplan-11-3664-Thy_vs_Aplan-11-3664-Tail	chr7	29148430	29148430	C	G	Rasgrp4	c.1294C>G	p.Arg432Gly	missense_variant	MODERATE	28	0	0.036	40	17	0.434	4.57656
Aplan-11-3664-Thy_vs_Aplan-11-3664-Tail	chr7	30022744	30022744	C	G	Zfp568	c.1113C>G	p.Ala371Ala	synonymous_variant	LOW	26	0	0.038	49	26	0.535	5.93228
Aplan-11-3664-Thy_vs_Aplan-11-3664-Tail	chr7	30359874	30359874	C	G	Lrfn3	c.925G>C	p.Ala309Pro	missense_variant	MODERATE	16	0	0.063	22	13	0.6	4.0028
Aplan-11-3664-Thy_vs_Aplan-11-3664-Tail	chr7	30443200	30443200	G	C	Aplp1	c.316C>G	p.Arg106Gly	missense_variant	MODERATE	27	0	0.042	41	21	0.514	5.76701
Aplan-11-3664-Thy_vs_Aplan-11-3664-Tail	chr7	30494478	30494478	C	G	Prodh2	c.551C>G	p.Ser184Trp	missense_variant	MODERATE	21	0	0.059	37	17	0.486	3.81444
Aplan-11-3664-Thy_vs_Aplan-11-3664-Tail	chr7	44461840	44461840	G	C	Lrrc4b	c.1135G>C	p.Glu379Gln	missense_variant	MODERATE	14	0	0.071	14	5	0.4	1.38997
Aplan-11-3664-Thy_vs_Aplan-11-3664-Tail	chr7	44708900	44708900	C	G	Izumo2	c.158C>G	p.Ala53Gly	missense_variant	MODERATE	40	0	0.028	43	14	0.346	4.41556
Aplan-11-3664-Thy_vs_Aplan-11-3664-Tail	chr7	45007808	45007808	C	G	Scaf1	c.1646G>C	p.Arg549Pro	missense_variant	MODERATE	23	0	0.043	44	17	0.361	3.59688
Aplan-11-3664-Thy_vs_Aplan-11-3664-Tail	chr7	45084894	45084894	C	G	Rcn3	c.679+10G>C		intron_variant	MODIFIER	37	0	0.03	60	23	0.4	5.53827
Aplan-11-3664-Thy_vs_Aplan-11-3664-Tail	chr7	45084904	45084904	C	G	Rcn3	c.679G>C	p.Ala227Pro	missense_variant&splice_region_variant	MODERATE	37	0	0.03	60	24	0.422	5.89405
Aplan-11-3664-Thy_vs_Aplan-11-3664-Tail	chr7	45088552	45088552	C	G	Rcn3	c.391G>C	p.Gly131Arg	missense_variant	MODERATE	13	0	0.1	28	17	0.52	3.82325
Aplan-11-3664-Thy_vs_Aplan-11-3664-Tail	chr7	45436730	45436730	C	G	Ruvbl2	c.-2467G>C		upstream_gene_variant	MODIFIER	25	0	0.046	31	15	0.469	4.56553
Aplan-11-3664-Thy_vs_Aplan-11-3664-Tail	chr7	45439487	45439487	C	G	Gys1	c.501C>G	p.Ala167Ala	synonymous_variant	LOW	29	0	0.037	38	18	0.467	5.42024
Aplan-11-3664-Thy_vs_Aplan-11-3664-Tail	chr7	45439897	45439897	C	G	Gys1	c.679-8C>G		splice_region_variant&intron_variant	LOW	35	0	0.032	38	18	0.549	6.15919
Aplan-11-3664-Thy_vs_Aplan-11-3664-Tail	chr7	46861828	46861828	G	C	Ldhc	c.59G>C	p.Arg20Pro	missense_variant	MODERATE	29	0	0.039	60	31	0.563	6.26649
Aplan-11-3664-Thy_vs_Aplan-11-3664-Tail	chr7	49408933	49408933	G	C	Nav2	c.776+27G>C		intron_variant	MODIFIER	33	0	0.035	27	11	0.478	4.41971
Aplan-11-3664-Thy_vs_Aplan-11-3664-Tail	chr7	51746928	51746928	C	G	Slc17a6-Fancf	n.51746928C>G		intergenic_region	MODIFIER	27	1	0.069	28	14	0.501	3.84519
Aplan-11-3664-Thy_vs_Aplan-11-3664-Tail	chr7	56982654	56982654	G	C	Gabrg3	c.545C>G	p.Ala182Gly	missense_variant	MODERATE	44	0	0.03	57	24	0.409	6.17531
Aplan-11-3664-Thy_vs_Aplan-11-3664-Tail	chr7	57816467	57816467	C	A	Gabrb3	c.1028C>A	p.Ala343Glu	missense_variant	MODERATE	60	0	0.02	62	23	0.352	6.1321
Aplan-11-3664-Thy_vs_Aplan-11-3664-Tail	chr7	79702139	79702139	C	G	Kif7	c.2877G>C	p.Thr959Thr	synonymous_variant	LOW	29	0	0.041	33	17	0.536	5.78312
Aplan-11-3664-Thy_vs_Aplan-11-3664-Tail	chr7	80085948	80085948	C	G	Zfp710	c.1465-3C>G		splice_region_variant&intron_variant	LOW	14	0	0.067	23	8	0.318	1.82909
Aplan-11-3664-Thy_vs_Aplan-11-3664-Tail	chr7	80238529	80238529	G	C	Gdpgp1	c.307G>C	p.Gly103Arg	missense_variant	MODERATE	51	0	0.023	70	32	0.444	6.2298
Aplan-11-3664-Thy_vs_Aplan-11-3664-Tail	chr7	80384252	80384252	C	G	Fes	c.423G>C	p.Gln141His	missense_variant	MODERATE	52	0	0.023	49	26	0.538	6.187
Aplan-11-3664-Thy_vs_Aplan-11-3664-Tail	chr7	80390830	80390830	G	C	Furin	c.2259C>G	p.Arg753Arg	synonymous_variant	LOW	33	0	0.034	39	17	0.437	5.14238
Aplan-11-3664-Thy_vs_Aplan-11-3664-Tail	chr7	80398738	80398738	G	C	Furin	c.33C>G	p.Val11Val	synonymous_variant	LOW	24	0	0.049	20	11	0.579	4.65955
Aplan-11-3664-Thy_vs_Aplan-11-3664-Tail	chr7	80738221	80738221	G	C	Iqgap1	c.2677C>G	p.Arg893Gly	missense_variant	MODERATE	13	0	0.068	25	9	0.4	1.79881
Aplan-11-3664-Thy_vs_Aplan-11-3664-Tail	chr7	81067939	81067939	C	G	Alpk3	c.243C>G	p.Thr81Thr	synonymous_variant	LOW	20	0	0.059	25	17	0.6	5.96203
Aplan-11-3664-Thy_vs_Aplan-11-3664-Tail	chr7	81067963	81067963	C	G	Alpk3	c.267C>G	p.Ser89Ser	synonymous_variant	LOW	20	0	0.059	21	16	0.648	6.61187
Aplan-11-3664-Thy_vs_Aplan-11-3664-Tail	chr7	85006878	85006878	G	C	Vmn2r66	c.929C>G	p.Ser310Cys	missense_variant	MODERATE	213	0	0.005134	360	172	0.48	5.67574
Aplan-11-3664-Thy_vs_Aplan-11-3664-Tail	chr7	88026580	88026580	G	C	Grm5	c.1301G>C	p.Arg434Pro	missense_variant	MODERATE	89	0	0.013	97	44	0.481	5.76814
Aplan-11-3664-Thy_vs_Aplan-11-3664-Tail	chr7	100160179	100160179	C	G	Lipt2	c.472C>G	p.Arg158Gly	missense_variant	MODERATE	32	0	0.035	52	15	0.289	3.47448
Aplan-11-3664-Thy_vs_Aplan-11-3664-Tail	chr7	100418525	100418525	C	G	C2cd3	c.2614C>G	p.Arg872Gly	missense_variant	MODERATE	66	0	0.019	61	32	0.519	6.53932
Aplan-11-3664-Thy_vs_Aplan-11-3664-Tail	chr7	100481929	100481929	C	G	Ucp3	c.588C>G	p.Tyr196*	stop_gained	HIGH	98	0	0.013	124	65	0.51	5.80408
Aplan-11-3664-Thy_vs_Aplan-11-3664-Tail	chr7	101509787	101509787	G	C	Pde2a	c.2267G>C	p.Arg756Pro	missense_variant	MODERATE	22	0	0.047	23	5	0.271	1.30896
Aplan-11-3664-Thy_vs_Aplan-11-3664-Tail	chr7	102236247	102236247	C	G	Pgap2	c.319C>G	p.Pro107Ala	missense_variant	MODERATE	77	0	0.014	89	39	0.432	6.04209
Aplan-11-3664-Thy_vs_Aplan-11-3664-Tail	chr7	102237141	102237141	G	C	Pgap2	c.533G>C	p.Trp178Ser	missense_variant	MODERATE	64	0	0.019	112	49	0.427	5.85727
Aplan-11-3664-Thy_vs_Aplan-11-3664-Tail	chr7	102604854	102604854	C	G	Olfr552	c.499C>G	p.Arg167Gly	missense_variant	MODERATE	85	0	0.014	112	56	0.49	5.97572
Aplan-11-3664-Thy_vs_Aplan-11-3664-Tail	chr7	105426126	105426126	C	G	Cckbr	c.102C>G	p.Ala34Ala	synonymous_variant	LOW	34	0	0.036	41	22	0.516	6.5592
Aplan-11-3664-Thy_vs_Aplan-11-3664-Tail	chr7	105758689	105758689	G	C	Dchs1	c.5935C>G	p.Leu1979Val	missense_variant	MODERATE	65	0	0.017	84	39	0.457	5.84911
Aplan-11-3664-Thy_vs_Aplan-11-3664-Tail	chr7	110788636	110788636	C	G	Ampd3	c.248C>G	p.Ser83Trp	missense_variant	MODERATE	36	0	0.03	41	17	0.405	5.48606
Aplan-11-3664-Thy_vs_Aplan-11-3664-Tail	chr7	116189276	116189276	C	G	Plekha7	c.296G>C	p.Arg99Pro	missense_variant	MODERATE	41	1	0.055	82	38	0.45	6.5928
Aplan-11-3664-Thy_vs_Aplan-11-3664-Tail	chr7	119519673	119519673	G	C	Pdilt	c.152C>G	p.Thr51Arg	missense_variant	MODERATE	55	0	0.021	77	18	0.242	4.42859
Aplan-11-3664-Thy_vs_Aplan-11-3664-Tail	chr7	119580710	119580710	C	G	Acsm2	c.1150C>G	p.Arg384Gly	missense_variant	MODERATE	62	0	0.02	90	39	0.418	5.92718
Aplan-11-3664-Thy_vs_Aplan-11-3664-Tail	chr7	119710619	119710619	C	G	Acsm4	c.1239C>G	p.Ser413Ser	synonymous_variant	LOW	39	0	0.03	93	42	0.464	6.05966
Aplan-11-3664-Thy_vs_Aplan-11-3664-Tail	chr7	122071974	122071974	C	G	Ubfd1	c.872C>G	p.Thr291Ser	missense_variant	MODERATE	25	0	0.042	53	19	0.41	3.42512
Aplan-11-3664-Thy_vs_Aplan-11-3664-Tail	chr7	122093656	122093656	C	G	Ndufab1	c.340G>C	p.Asp114His	missense_variant	MODERATE	82	2	0.034	124	67	0.516	6.00463
Aplan-11-3664-Thy_vs_Aplan-11-3664-Tail	chr7	125628135	125628135	C	A	Il21r	c.444C>A	p.Tyr148*	stop_gained	HIGH	41	0	0.028	68	40	0.584	6.42326
Aplan-11-3664-Thy_vs_Aplan-11-3664-Tail	chr7	126672135	126672135	C	G	Sult1a1	c.*1274G>C		downstream_gene_variant	MODIFIER	102	0	0.012	135	62	0.487	5.85901
Aplan-11-3664-Thy_vs_Aplan-11-3664-Tail	chr7	126828851	126828851	C	G	Fam57b	c.495C>G	p.Ala165Ala	synonymous_variant	LOW	49	0	0.027	55	21	0.411	6.32166
Aplan-11-3664-Thy_vs_Aplan-11-3664-Tail	chr7	126967103	126967103	C	G	Sez6l2	c.2386C>G	p.Arg796Gly	missense_variant	MODERATE	60	0	0.021	55	20	0.351	6.39411
Aplan-11-3664-Thy_vs_Aplan-11-3664-Tail	chr7	126989699	126989699	C	G	Mvp	c.1895G>C	p.Arg632Pro	missense_variant	MODERATE	44	0	0.025	72	27	0.373	6.38033
Aplan-11-3664-Thy_vs_Aplan-11-3664-Tail	chr7	126993759	126993759	G	T	Mvp	c.979C>A	p.Arg327Arg	synonymous_variant	LOW	27	0	0.04	38	15	0.438	3.83457
Aplan-11-3664-Thy_vs_Aplan-11-3664-Tail	chr7	126995747	126995747	G	C	Mvp	c.925C>G	p.Arg309Gly	missense_variant	MODERATE	13	0	0.071	21	13	0.6	3.62483
Aplan-11-3664-Thy_vs_Aplan-11-3664-Tail	chr7	126996016	126996016	C	G	Mvp	c.700-44G>C		intron_variant	MODIFIER	24	0	0.048	34	13	0.406	3.48945
Aplan-11-3664-Thy_vs_Aplan-11-3664-Tail	chr7	126998248	126998249	CC	GT	Mvp	c.581_582delGGinsAC	p.Arg194His	missense_variant	MODERATE	28	0	0.042	38	18	0.486	5.08904
Aplan-11-3664-Thy_vs_Aplan-11-3664-Tail	chr7	127001489	127001489	C	G	Mvp	c.339G>C	p.Leu113Leu	synonymous_variant	LOW	28	0	0.038	44	26	0.585	6.05506
Aplan-11-3664-Thy_vs_Aplan-11-3664-Tail	chr7	127001572	127001572	C	G	Mvp	c.256G>C	p.Val86Leu	missense_variant	MODERATE	35	0	0.033	58	31	0.583	6.20688
Aplan-11-3664-Thy_vs_Aplan-11-3664-Tail	chr7	127015371	127015371	C	G	Pagr1a	c.661G>C	p.Gly221Arg	missense_variant	MODERATE	25	0	0.045	26	15	0.591	5.46242
Aplan-11-3664-Thy_vs_Aplan-11-3664-Tail	chr7	127033503	127033503	C	G	Kif22	c.710G>C	p.Arg237Pro	missense_variant	MODERATE	22	0	0.043	52	24	0.479	4.55695
Aplan-11-3664-Thy_vs_Aplan-11-3664-Tail	chr7	127386832	127386832	C	G	9130019O22Rik	c.126G>C	p.Ala42Ala	synonymous_variant	LOW	44	2	0.051	64	32	0.476	6.29798
Aplan-11-3664-Thy_vs_Aplan-11-3664-Tail	chr7	127596701	127596701	G	T	Rnf40	c.2097+19G>T		intron_variant	MODIFIER	33	0	0.032	42	21	0.512	6.21994
Aplan-11-3664-Thy_vs_Aplan-11-3664-Tail	chr7	127596872	127596872	G	A	Rnf40	c.2166G>A	p.Ala722Ala	synonymous_variant	LOW	26	0	0.04	68	33	0.445	5.84361
Aplan-11-3664-Thy_vs_Aplan-11-3664-Tail	chr7	127600412	127600412	G	C	Rnf40	c.2693G>C	p.Arg898Pro	missense_variant	MODERATE	37	0	0.029	44	21	0.5	6.69928
Aplan-11-3664-Thy_vs_Aplan-11-3664-Tail	chr7	127600626	127600626	G	C	Rnf40	c.2829G>C	p.Lys943Asn	missense_variant&splice_region_variant	MODERATE	48	0	0.025	60	22	0.404	6.03244
Aplan-11-3664-Thy_vs_Aplan-11-3664-Tail	chr7	128203013	128203013	G	C	Itgad	c.2962G>C	p.Glu988Gln	missense_variant	MODERATE	46	0	0.024	75	71	0.921	5.91437
Aplan-11-3664-Thy_vs_Aplan-11-3664-Tail	chr7	128203026	128203026	G	A	Itgad	c.2975G>A	p.Arg992Gln	missense_variant	MODERATE	46	0	0.024	69	18	0.262	4.38261
Aplan-11-3664-Thy_vs_Aplan-11-3664-Tail	chr7	128240603	128240603	C	G	Armc5	c.1092C>G	p.Ala364Ala	synonymous_variant	LOW	36	0	0.03	38	9	0.251	2.63326
Aplan-11-3664-Thy_vs_Aplan-11-3664-Tail	chr7	128243436	128243436	G	C	Armc5	c.1952G>C	p.Arg651Pro	missense_variant	MODERATE	23	0	0.045	29	24	0.807	5.97763
Aplan-11-3664-Thy_vs_Aplan-11-3664-Tail	chr7	140229774	140229774	G	C	Cd163l1	c.2695G>C	p.Glu899Gln	missense_variant	MODERATE	43	0	0.027	59	58	0.962	6.17177
Aplan-11-3664-Thy_vs_Aplan-11-3664-Tail	chr7	141068682	141068682	G	C	B4galnt4	c.2110G>C	p.Gly704Arg	missense_variant	MODERATE	19	0	0.056	27	26	0.92	6.60428
Aplan-11-3664-Thy_vs_Aplan-11-3664-Tail	chr7	142439742	142439742	G	C	Syt8	c.797G>C	p.Arg266Pro	missense_variant	MODERATE	31	0	0.035	71	15	0.234	2.34311
Aplan-11-3664-Thy_vs_Aplan-11-3664-Tail	chr7	143183634	143183634	C	T	Kcnq1	c.688C>T	p.Arg230Cys	missense_variant	MODERATE	33	0	0.037	84	82	0.949	6.08823
Aplan-11-3664-Thy_vs_Aplan-11-3664-Tail	chr8	13414324	13414324	G	C	Grk1	c.1195G>C	p.Val399Leu	missense_variant&splice_region_variant	MODERATE	44	0	0.027	67	39	0.558	6.26571
Aplan-11-3664-Thy_vs_Aplan-11-3664-Tail	chr8	13836796	13836796	G	C	AF366264	c.1294C>G	p.Arg432Gly	missense_variant	MODERATE	237	2	0.015	397	178	0.45	5.71857
Aplan-11-3664-Thy_vs_Aplan-11-3664-Tail	chr8	13837534	13837534	G	A	AF366264	c.556C>T	p.Arg186*	stop_gained	HIGH	222	0	0.005698	333	167	0.496	5.66447
Aplan-11-3664-Thy_vs_Aplan-11-3664-Tail	chr8	13878098	13878098	C	G	Champ1	c.255C>G	p.His85Gln	missense_variant	MODERATE	48	0	0.022	63	30	0.462	6.06725
Aplan-11-3664-Thy_vs_Aplan-11-3664-Tail	chr8	14936826	14936826	G	C	Arhgef10	c.682+29G>C		intron_variant	MODIFIER	54	0	0.021	72	36	0.508	6.09673
Aplan-11-3664-Thy_vs_Aplan-11-3664-Tail	chr8	23256720	23256720	G	C	Golga7	c.65C>G	p.Thr22Arg	missense_variant	MODERATE	25	0	0.043	39	16	0.424	4.07458
Aplan-11-3664-Thy_vs_Aplan-11-3664-Tail	chr8	25032932	25032932	C	G	Htra4	c.1017+28G>C		intron_variant	MODIFIER	76	0	0.017	83	39	0.454	6.09946
Aplan-11-3664-Thy_vs_Aplan-11-3664-Tail	chr8	25581733	25581733	C	G	Letm2	c.1152G>C	p.Ser384Ser	synonymous_variant	LOW	51	0	0.024	51	18	0.366	5.90955
Aplan-11-3664-Thy_vs_Aplan-11-3664-Tail	chr8	34092519	34092519	G	C	Dctn6	c.481C>G	p.Arg161Gly	missense_variant	MODERATE	27	0	0.042	33	18	0.586	5.8455
Aplan-11-3664-Thy_vs_Aplan-11-3664-Tail	chr8	34092547	34092547	C	G	Dctn6	c.453G>C	p.Ala151Ala	synonymous_variant	LOW	28	0	0.04	37	22	0.625	6.27054
Aplan-11-3664-Thy_vs_Aplan-11-3664-Tail	chr8	41084181	41084181	G	C	Mtus1	c.497C>G	p.Thr166Arg	missense_variant	MODERATE	134	0	0.00919	158	34	0.206	5.78415
Aplan-11-3664-Thy_vs_Aplan-11-3664-Tail	chr8	44951644	44951644	G	C	Fat1	c.1431G>C	p.Ala477Ala	synonymous_variant	LOW	111	0	0.01	142	28	0.205	6.04689
Aplan-11-3664-Thy_vs_Aplan-11-3664-Tail	chr8	44952518	44952518	G	C	Fat1	c.2305G>C	p.Asp769His	missense_variant	MODERATE	116	0	0.009753	131	28	0.204	5.95515
Aplan-11-3664-Thy_vs_Aplan-11-3664-Tail	chr8	45025313	45025313	C	T	Fat1	c.7326C>T	p.Ile2442Ile	synonymous_variant	LOW	49	0	0.021	70	32	0.5	5.81829
Aplan-11-3664-Thy_vs_Aplan-11-3664-Tail	chr8	69886411	69886411	G	C	Cilp2	c.163+23C>G		intron_variant	MODIFIER	26	0	0.042	32	18	0.496	5.89504
Aplan-11-3664-Thy_vs_Aplan-11-3664-Tail	chr8	70321696	70321696	G	C	Cers1	c.590+12G>C		intron_variant	MODIFIER	14	0	0.071	19	6	0.353	1.5653
Aplan-11-3664-Thy_vs_Aplan-11-3664-Tail	chr8	70323376	70323376	G	C	Cers1	c.916G>C	p.Ala306Pro	missense_variant	MODERATE	39	0	0.026	83	37	0.443	5.90885
Aplan-11-3664-Thy_vs_Aplan-11-3664-Tail	chr8	70331282	70331282	C	G	Gdf1	c.879C>G	p.Pro293Pro	synonymous_variant	LOW	24	0	0.042	43	22	0.513	5.28651
Aplan-11-3664-Thy_vs_Aplan-11-3664-Tail	chr8	70451525	70451525	C	G	Klhl26	c.1734G>C	p.Glu578Asp	missense_variant	MODERATE	50	0	0.023	63	30	0.446	6.07954
Aplan-11-3664-Thy_vs_Aplan-11-3664-Tail	chr8	70531624	70531624	C	G	Fkbp8	c.624C>G	p.Arg208Arg	synonymous_variant	LOW	16	0	0.061	34	20	0.567	4.48076
Aplan-11-3664-Thy_vs_Aplan-11-3664-Tail	chr8	70748424	70748424	G	C	Pde4c	c.1390G>C	p.Ala464Pro	missense_variant	MODERATE	38	0	0.03	49	29	0.619	6.25724
Aplan-11-3664-Thy_vs_Aplan-11-3664-Tail	chr8	70770419	70770419	G	C	Pik3r2	c.1356C>G	p.Arg452Arg	synonymous_variant	LOW	12	0	0.075	18	8	0.45	2.00015
Aplan-11-3664-Thy_vs_Aplan-11-3664-Tail	chr8	70772017	70772017	C	G	Pik3r2	c.613G>C	p.Val205Leu	missense_variant	MODERATE	12	0	0.077	14	9	0.626	3.14804
Aplan-11-3664-Thy_vs_Aplan-11-3664-Tail	chr8	70787670	70787670	G	C	Mast3	c.1001C>G	p.Pro334Arg	missense_variant	MODERATE	47	0	0.027	48	19	0.413	6.38605
Aplan-11-3664-Thy_vs_Aplan-11-3664-Tail	chr8	71709026	71709026	G	C	Fcho1	c.2499C>G	p.Ala833Ala	synonymous_variant	LOW	21	0	0.048	31	15	0.483	4.05063
Aplan-11-3664-Thy_vs_Aplan-11-3664-Tail	chr8	71992854	71992854	G	C	Cyp4f18	c.1093C>G	p.Arg365Gly	missense_variant	MODERATE	43	0	0.025	64	26	0.396	6.60202
Aplan-11-3664-Thy_vs_Aplan-11-3664-Tail	chr8	72251767	72251767	C	G	Ap1m1	c.571C>G	p.Arg191Gly	missense_variant	MODERATE	26	0	0.04	39	24	0.559	5.97242
Aplan-11-3664-Thy_vs_Aplan-11-3664-Tail	chr8	72396978	72396978	C	G	Eps15l1	c.233G>C	p.Arg78Pro	missense_variant	MODERATE	36	0	0.033	60	29	0.489	6.25656
Aplan-11-3664-Thy_vs_Aplan-11-3664-Tail	chr8	80612670	80612670	G	C	Frem3	c.1591G>C	p.Val531Leu	missense_variant	MODERATE	51	0	0.023	90	35	0.392	5.90698
Aplan-11-3664-Thy_vs_Aplan-11-3664-Tail	chr8	80788998	80788998	G	C	Gab1	c.690C>G	p.His230Gln	missense_variant	MODERATE	65	0	0.018	66	14	0.237	4.24762
Aplan-11-3664-Thy_vs_Aplan-11-3664-Tail	chr8	83668684	83668684	G	C	Ptger1	c.789G>C	p.Leu263Phe	missense_variant	MODERATE	29	0	0.038	31	12	0.32	3.86033
Aplan-11-3664-Thy_vs_Aplan-11-3664-Tail	chr8	84566279	84566279	G	C	Cacna1a	c.3295G>C	p.Val1099Leu	missense_variant	MODERATE	22	0	0.048	26	11	0.412	3.42811
Aplan-11-3664-Thy_vs_Aplan-11-3664-Tail	chr8	84696863	84696863	G	C	Trmt1	c.904G>C	p.Ala302Pro	missense_variant	MODERATE	46	0	0.024	66	37	0.528	6.40328
Aplan-11-3664-Thy_vs_Aplan-11-3664-Tail	chr8	84721794	84721794	G	C	Nfix	c.1079C>G	p.Ala360Gly	missense_variant	MODERATE	43	1	0.059	33	13	0.357	4.43118
Aplan-11-3664-Thy_vs_Aplan-11-3664-Tail	chr8	84816408	84816408	C	G	Dand5	c.438G>C	p.Pro146Pro	synonymous_variant	LOW	41	0	0.026	54	25	0.458	6.83929
Aplan-11-3664-Thy_vs_Aplan-11-3664-Tail	chr8	85010714	85010714	G	C	Best2	c.714+49C>G		intron_variant	MODIFIER	33	0	0.034	40	18	0.513	5.53323
Aplan-11-3664-Thy_vs_Aplan-11-3664-Tail	chr8	86672958	86672958	C	G	Lonp2	c.1684C>G	p.Arg562Gly	missense_variant	MODERATE	45	0	0.026	77	33	0.443	5.88604
Aplan-11-3664-Thy_vs_Aplan-11-3664-Tail	chr8	91299275	91299275	C	G	Rpgrip1l	c.730G>C	p.Glu244Gln	missense_variant	MODERATE	69	2	0.038	70	29	0.418	6.54069
Aplan-11-3664-Thy_vs_Aplan-11-3664-Tail	chr8	93020465	93020465	G	A	Ces1a	c.1645C>T	p.Arg549Trp	missense_variant	MODERATE	60	0	0.019	93	38	0.39	6.07463
Aplan-11-3664-Thy_vs_Aplan-11-3664-Tail	chr8	94098340	94098340	C	G	Bbs2	c.13G>C	p.Val5Leu	missense_variant	MODERATE	17	0	0.067	16	6	0.4	2.14085
Aplan-11-3664-Thy_vs_Aplan-11-3664-Tail	chr8	94340560	94340560	C	G	Slc12a3	c.1242C>G	p.Cys414Trp	missense_variant	MODERATE	33	0	0.037	43	19	0.5	5.30395
Aplan-11-3664-Thy_vs_Aplan-11-3664-Tail	chr8	94392333	94392333	C	G	Herpud1	c.714C>G	p.Pro238Pro	synonymous_variant	LOW	66	0	0.018	86	49	0.58	6.28492
Aplan-11-3664-Thy_vs_Aplan-11-3664-Tail	chr8	94937637	94937637	G	C	Adgrg5	c.874G>C	p.Val292Leu	missense_variant	MODERATE	38	0	0.029	70	32	0.433	5.83486
Aplan-11-3664-Thy_vs_Aplan-11-3664-Tail	chr8	95368061	95368061	C	G	Mmp15	c.562C>G	p.Arg188Gly	missense_variant	MODERATE	26	0	0.042	52	27	0.518	5.82432
Aplan-11-3664-Thy_vs_Aplan-11-3664-Tail	chr8	104131098	104131098	G	C	Cdh5	c.1155G>C	p.Lys385Asn	missense_variant	MODERATE	50	0	0.024	59	24	0.354	5.96228
Aplan-11-3664-Thy_vs_Aplan-11-3664-Tail	chr8	105391892	105391892	C	G	Kctd19	c.1036G>C	p.Ala346Pro	missense_variant	MODERATE	23	0	0.05	25	10	0.421	3.17091
Aplan-11-3664-Thy_vs_Aplan-11-3664-Tail	chr8	105617659	105617659	C	G	Fam65a	c.1424C>G	p.Pro475Arg	missense_variant	MODERATE	57	1	0.024	69	31	0.457	5.95558
Aplan-11-3664-Thy_vs_Aplan-11-3664-Tail	chr8	105618582	105618582	C	G	Fam65a	c.2347C>G	p.Pro783Ala	missense_variant	MODERATE	62	0	0.019	77	31	0.397	6.0894
Aplan-11-3664-Thy_vs_Aplan-11-3664-Tail	chr8	105618767	105618767	C	G	Mir1966	n.*3194C>G		downstream_gene_variant	MODIFIER	45	0	0.024	55	23	0.42	6.50905
Aplan-11-3664-Thy_vs_Aplan-11-3664-Tail	chr8	105621440	105621440	C	G	Fam65a	c.3446C>G	p.Thr1149Ser	missense_variant	MODERATE	70	0	0.017	111	55	0.472	5.97477
Aplan-11-3664-Thy_vs_Aplan-11-3664-Tail	chr8	105709565	105709565	C	G	4933405L10Rik	c.468C>G	p.Ala156Ala	synonymous_variant	LOW	48	0	0.026	66	37	0.544	6.19069
Aplan-11-3664-Thy_vs_Aplan-11-3664-Tail	chr8	105946804	105946804	G	C	Slc12a4	c.2134C>G	p.Arg712Gly	missense_variant	MODERATE	16	0	0.058	30	13	0.431	2.81944
Aplan-11-3664-Thy_vs_Aplan-11-3664-Tail	chr8	106179251	106179251	G	A	Slc7a6	c.114G>A	p.Thr38Thr	synonymous_variant	LOW	42	0	0.026	58	28	0.488	6.17551
Aplan-11-3664-Thy_vs_Aplan-11-3664-Tail	chr8	107262853	107262853	G	C	Mir5098	n.21-1104G>C		intron_variant	MODIFIER	123	0	0.009861	170	82	0.477	5.81368
Aplan-11-3664-Thy_vs_Aplan-11-3664-Tail	chr8	111462251	111462251	C	G	Wdr59	c.2157G>C	p.Thr719Thr	synonymous_variant	LOW	48	0	0.028	44	15	0.319	5.45479
Aplan-11-3664-Thy_vs_Aplan-11-3664-Tail	chr8	117056400	117056400	G	C	Pkd1l2	c.2180C>G	p.Thr727Ser	missense_variant	MODERATE	21	0	0.05	32	10	0.32	2.4192
Aplan-11-3664-Thy_vs_Aplan-11-3664-Tail	chr8	117065576	117065576	G	C	Pkd1l2	c.1476C>G	p.Asn492Lys	missense_variant	MODERATE	28	0	0.039	42	18	0.429	4.78471
Aplan-11-3664-Thy_vs_Aplan-11-3664-Tail	chr8	119598599	119598599	G	C	Taf1c	c.*12C>G		3_prime_UTR_variant	MODIFIER	21	0	0.043	30	19	0.63	5.5396
Aplan-11-3664-Thy_vs_Aplan-11-3664-Tail	chr8	120149374	120149374	C	G	6430548M08Rik	c.412C>G	p.Arg138Gly	missense_variant	MODERATE	17	0	0.063	16	7	0.471	2.57221
Aplan-11-3664-Thy_vs_Aplan-11-3664-Tail	chr8	120659016	120659016	C	G	Emc8	c.358G>C	p.Ala120Pro	missense_variant	MODERATE	25	0	0.042	48	30	0.595	6.97694
Aplan-11-3664-Thy_vs_Aplan-11-3664-Tail	chr8	122397989	122397989	G	A	Zc3h18	c.897+23G>A		intron_variant	MODIFIER	47	0	0.023	46	25	0.556	6.05126
Aplan-11-3664-Thy_vs_Aplan-11-3664-Tail	chr8	122570179	122570179	C	G	Aprt	c.*4706G>C		downstream_gene_variant	MODIFIER	54	0	0.021	59	28	0.49	6.34497
Aplan-11-3664-Thy_vs_Aplan-11-3664-Tail	chr8	122628366	122628366	G	C	Cbfa2t3	c.*2341C>G		3_prime_UTR_variant	MODIFIER	40	0	0.032	49	22	0.475	6.26582
Aplan-11-3664-Thy_vs_Aplan-11-3664-Tail	chr8	122860948	122860948	G	A	Cdh15	c.610G>A	p.Asp204Asn	missense_variant	MODERATE	23	0	0.046	39	14	0.358	3.00891
Aplan-11-3664-Thy_vs_Aplan-11-3664-Tail	chr8	122866983	122866983	C	G	Cdh15	c.2315C>G	p.Pro772Arg	missense_variant	MODERATE	17	0	0.063	31	14	0.44	3.17311
Aplan-11-3664-Thy_vs_Aplan-11-3664-Tail	chr8	122895377	122895377	C	G	Ankrd11	c.1672G>C	p.Ala558Pro	missense_variant	MODERATE	57	0	0.019	77	40	0.515	5.99734
Aplan-11-3664-Thy_vs_Aplan-11-3664-Tail	chr8	123226360	123226360	G	C	Cdk10	c.101G>C	p.Arg34Pro	missense_variant	MODERATE	67	0	0.018	76	30	0.402	6.12071
Aplan-11-3664-Thy_vs_Aplan-11-3664-Tail	chr8	123233611	123233611	C	G	Spata2l	c.938G>C	p.Arg313Pro	missense_variant	MODERATE	24	0	0.047	21	12	0.632	4.99055
Aplan-11-3664-Thy_vs_Aplan-11-3664-Tail	chr9	7157683	7157683	C	G	Dync2h1	c.2443G>C	p.Gly815Arg	missense_variant	MODERATE	109	0	0.011	144	63	0.454	5.7642
Aplan-11-3664-Thy_vs_Aplan-11-3664-Tail	chr9	21029848	21029848	G	C	Icam5	c.-2282G>C		upstream_gene_variant	MODIFIER	19	0	0.053	33	14	0.438	3.1478
Aplan-11-3664-Thy_vs_Aplan-11-3664-Tail	chr9	21348592	21348592	C	G	Slc44a2	c.1895C>G	p.Ala632Gly	missense_variant	MODERATE	104	0	0.011	137	58	0.442	5.79107
Aplan-11-3664-Thy_vs_Aplan-11-3664-Tail	chr9	21747177	21747177	C	G	Ldlr	c.2424C>G	p.Ala808Ala	synonymous_variant	LOW	16	0	0.065	31	19	0.6	4.63387
Aplan-11-3664-Thy_vs_Aplan-11-3664-Tail	chr9	21831451	21831451	G	C	Dock6	c.2347C>G	p.Arg783Gly	missense_variant	MODERATE	20	0	0.048	45	23	0.515	4.47034
Aplan-11-3664-Thy_vs_Aplan-11-3664-Tail	chr9	22453784	22453784	G	C	Rp9	c.376C>G	p.Arg126Gly	missense_variant	MODERATE	59	0	0.019	76	39	0.509	6.03471
Aplan-11-3664-Thy_vs_Aplan-11-3664-Tail	chr9	23300966	23300966	C	G	Bmper	c.520C>G	p.Arg174Gly	missense_variant	MODERATE	86	0	0.015	78	43	0.533	5.67481
Aplan-11-3664-Thy_vs_Aplan-11-3664-Tail	chr9	31097602	31097602	C	G	St14	c.1414G>C	p.Asp472His	missense_variant	MODERATE	30	0	0.037	45	22	0.5	6.02076
Aplan-11-3664-Thy_vs_Aplan-11-3664-Tail	chr9	40074475	40074475	G	C	Olfr982	c.179G>C	p.Arg60Pro	missense_variant	MODERATE	105	2	0.023	152	69	0.455	6.02043
Aplan-11-3664-Thy_vs_Aplan-11-3664-Tail	chr9	40760919	40760919	C	G	Clmp	c.44C>G	p.Thr15Arg	missense_variant	MODERATE	24	0	0.04	52	10	0.204	1.59037
Aplan-11-3664-Thy_vs_Aplan-11-3664-Tail	chr9	40803820	40803820	C	G	Hspa8	c.1201C>G	p.Leu401Val	missense_variant	MODERATE	74	0	0.015	130	53	0.414	6.08407
Aplan-11-3664-Thy_vs_Aplan-11-3664-Tail	chr9	43015880	43015880	C	G	Arhgef12	c.924+23G>C		intron_variant	MODIFIER	29	0	0.04	24	11	0.428	4.48482
Aplan-11-3664-Thy_vs_Aplan-11-3664-Tail	chr9	43142770	43142770	G	C	Pou2f3	c.368C>G	p.Pro123Arg	missense_variant	MODERATE	32	0	0.038	34	12	0.333	3.8034
Aplan-11-3664-Thy_vs_Aplan-11-3664-Tail	chr9	44091035	44091035	G	C	Usp2	c.1023G>C	p.Thr341Thr	synonymous_variant	LOW	100	0	0.011	133	70	0.544	5.85441
Aplan-11-3664-Thy_vs_Aplan-11-3664-Tail	chr9	44173334	44173334	G	C	Cbl	c.503C>G	p.Pro168Arg	missense_variant	MODERATE	44	0	0.026	60	27	0.48	6.1899
Aplan-11-3664-Thy_vs_Aplan-11-3664-Tail	chr9	44274468	44274468	C	G	Abcg4	c.*164G>C		3_prime_UTR_variant	MODIFIER	31	0	0.037	31	8	0.285	2.33102
Aplan-11-3664-Thy_vs_Aplan-11-3664-Tail	chr9	44274520	44274520	C	G	Abcg4	c.*112G>C		3_prime_UTR_variant	MODIFIER	33	1	0.038	33	12	0.395	2.92037
Aplan-11-3664-Thy_vs_Aplan-11-3664-Tail	chr9	44275306	44275306	C	G	Abcg4	c.1540G>C	p.Ala514Pro	missense_variant	MODERATE	20	0	0.053	28	20	0.658	6.38384
Aplan-11-3664-Thy_vs_Aplan-11-3664-Tail	chr9	44715472	44715472	G	C	Phldb1	c.1675C>G	p.Arg559Gly	missense_variant	MODERATE	35	0	0.034	43	25	0.586	6.55469
Aplan-11-3664-Thy_vs_Aplan-11-3664-Tail	chr9	50763892	50763892	G	C	1110032A03Rik	c.513C>G	p.Ser171Ser	synonymous_variant	LOW	40	0	0.027	70	17	0.23	3.62046
Aplan-11-3664-Thy_vs_Aplan-11-3664-Tail	chr9	50792384	50792384	C	G	Alg9	c.872C>G	p.Thr291Arg	missense_variant	MODERATE	70	0	0.017	105	39	0.392	5.80375
Aplan-11-3664-Thy_vs_Aplan-11-3664-Tail	chr9	57254268	57254268	C	G	1700017B05Rik	c.2766G>C	p.Glu922Asp	missense_variant	MODERATE	29	1	0.067	45	16	0.375	2.86732
Aplan-11-3664-Thy_vs_Aplan-11-3664-Tail	chr9	58145733	58145733	G	C	Stra6	c.809G>C	p.Arg270Pro	missense_variant	MODERATE	54	0	0.022	61	35	0.572	6.33785
Aplan-11-3664-Thy_vs_Aplan-11-3664-Tail	chr9	58157180	58157180	C	G	Islr	c.1043G>C	p.Gly348Ala	missense_variant	MODERATE	35	0	0.035	69	31	0.473	6.33049
Aplan-11-3664-Thy_vs_Aplan-11-3664-Tail	chr9	61914435	61914435	G	C	Rplp1	c.-7C>G		5_prime_UTR_variant	MODIFIER	23	0	0.043	37	22	0.6	6.08432
Aplan-11-3664-Thy_vs_Aplan-11-3664-Tail	chr9	61921165	61921165	G	C	Kif23	c.2464C>G	p.Gln822Glu	missense_variant	MODERATE	61	1	0.04	113	68	0.582	6.16247
Aplan-11-3664-Thy_vs_Aplan-11-3664-Tail	chr9	64852386	64852386	G	C	Dennd4a	c.802-30G>C		intron_variant	MODIFIER	39	0	0.026	37	19	0.514	6.64509
Aplan-11-3664-Thy_vs_Aplan-11-3664-Tail	chr9	69450874	69450874	G	C	Anxa2	c.-13603G>C		upstream_gene_variant	MODIFIER	30	0	0.032	37	13	0.361	3.56661
Aplan-11-3664-Thy_vs_Aplan-11-3664-Tail	chr9	72385328	72385328	C	G	Zfp280d-Mns1	n.72385328C>G		intergenic_region	MODIFIER	47	0	0.023	58	27	0.473	6.01712
Aplan-11-3664-Thy_vs_Aplan-11-3664-Tail	chr9	72848413	72848413	G	C	Prtg	c.896G>C	p.Arg299Pro	missense_variant	MODERATE	62	0	0.02	85	46	0.528	5.77783
Aplan-11-3664-Thy_vs_Aplan-11-3664-Tail	chr9	91361620	91361620	G	C	Zic1	c.1293C>G	p.His431Gln	missense_variant	MODERATE	51	0	0.025	73	36	0.47	6.10733
Aplan-11-3664-Thy_vs_Aplan-11-3664-Tail	chr9	95560574	95560574	G	C	Paqr9	c.616G>C	p.Val206Leu	missense_variant	MODERATE	23	0	0.042	24	16	0.638	6.18552
Aplan-11-3664-Thy_vs_Aplan-11-3664-Tail	chr9	101211147	101211147	G	C	Ppp2r3a	c.1976C>G	p.Thr659Arg	missense_variant	MODERATE	121	0	0.01	186	91	0.499	5.76944
Aplan-11-3664-Thy_vs_Aplan-11-3664-Tail	chr9	103223645	103223645	G	C	Trf	c.636-6C>G		splice_region_variant&intron_variant	LOW	43	0	0.027	76	48	0.622	5.76578
Aplan-11-3664-Thy_vs_Aplan-11-3664-Tail	chr9	105738183	105738183	C	T	Col6a6	c.4749+16G>A		intron_variant	MODIFIER	100	2	0.027	123	54	0.449	6.00769
Aplan-11-3664-Thy_vs_Aplan-11-3664-Tail	chr9	107603860	107603860	G	C	Sema3b	c.277C>G	p.Pro93Ala	missense_variant	MODERATE	69	0	0.016	84	40	0.477	6.09174
Aplan-11-3664-Thy_vs_Aplan-11-3664-Tail	chr9	107946232	107946232	G	C	Traip	c.-4843G>C		upstream_gene_variant	MODIFIER	34	0	0.03	52	29	0.587	6.50718
Aplan-11-3664-Thy_vs_Aplan-11-3664-Tail	chr9	108056559	108056559	G	C	Rnf123	c.3319C>G	p.Arg1107Gly	missense_variant	MODERATE	35	0	0.032	70	28	0.416	5.59828
Aplan-11-3664-Thy_vs_Aplan-11-3664-Tail	chr9	108077799	108077799	G	C	Rnf123	c.5C>G	p.Ala2Gly	missense_variant	MODERATE	25	0	0.049	44	23	0.553	5.6721
Aplan-11-3664-Thy_vs_Aplan-11-3664-Tail	chr9	108082305	108082305	C	G	Mst1	c.789C>G	p.Cys263Trp	missense_variant	MODERATE	50	0	0.022	68	14	0.22	3.54631
Aplan-11-3664-Thy_vs_Aplan-11-3664-Tail	chr9	108562830	108562830	C	G	Impdh2	c.570C>G	p.Ala190Ala	synonymous_variant	LOW	51	0	0.025	68	25	0.377	6.48047
Aplan-11-3664-Thy_vs_Aplan-11-3664-Tail	chr9	108571466	108571466	C	G	Dalrd3	c.942C>G	p.Pro314Pro	synonymous_variant	LOW	49	0	0.021	66	29	0.465	6.24047
Aplan-11-3664-Thy_vs_Aplan-11-3664-Tail	chr9	108581864	108581864	C	G	P4htm	c.868G>C	p.Val290Leu	missense_variant	MODERATE	14	0	0.07	13	7	0.5	2.71391
Aplan-11-3664-Thy_vs_Aplan-11-3664-Tail	chr9	108581991	108581991	C	G	P4htm	c.741G>C	p.Leu247Leu	synonymous_variant	LOW	21	0	0.056	16	7	0.533	2.95422
Aplan-11-3664-Thy_vs_Aplan-11-3664-Tail	chr9	108583646	108583646	C	G	P4htm	c.626G>C	p.Arg209Pro	missense_variant	MODERATE	22	0	0.049	16	9	0.5	4.15379
Aplan-11-3664-Thy_vs_Aplan-11-3664-Tail	chr9	108583760	108583760	C	G	P4htm	c.512G>C	p.Arg171Pro	missense_variant	MODERATE	33	0	0.037	47	20	0.444	5.5101
Aplan-11-3664-Thy_vs_Aplan-11-3664-Tail	chr9	108613744	108613744	C	G	Arih2	c.749G>C	p.Arg250Pro	missense_variant	MODERATE	44	0	0.027	57	30	0.52	6.29418
Aplan-11-3664-Thy_vs_Aplan-11-3664-Tail	chr9	108842599	108842599	C	G	Celsr3	c.7375C>G	p.Arg2459Gly	missense_variant	MODERATE	50	0	0.024	87	34	0.441	6.13082
Aplan-11-3664-Thy_vs_Aplan-11-3664-Tail	chr9	108846795	108846795	G	A	Celsr3	c.8726G>A	p.Arg2909Gln	missense_variant	MODERATE	36	0	0.031	50	18	0.309	4.74505
Aplan-11-3664-Thy_vs_Aplan-11-3664-Tail	chr9	109605065	109605065	G	C	Fbxw24	c.1176C>G	p.Pro392Pro	synonymous_variant	LOW	167	0	0.007796	215	97	0.46	5.78546
Aplan-11-3664-Thy_vs_Aplan-11-3664-Tail	chr9	115109382	115109382	G	C	Osbpl10	c.19-18G>C		intron_variant	MODIFIER	27	0	0.04	63	28	0.451	5.08118
Aplan-11-3664-Thy_vs_Aplan-11-3664-Tail	chr9	119927814	119927814	C	G	Gorasp1	c.1301G>C	p.Ser434Thr	missense_variant	MODERATE	18	0	0.054	10	6	0.601	3.25382
Aplan-11-3664-Thy_vs_Aplan-11-3664-Tail	chr9	119967338	119967338	G	C	Csrnp1	c.*4902C>G		downstream_gene_variant	MODIFIER	61	0	0.019	78	41	0.499	5.80267
Aplan-11-3664-Thy_vs_Aplan-11-3664-Tail	chr9	120094715	120094715	G	C	Ccr8	c.895G>C	p.Ala299Pro	missense_variant	MODERATE	65	0	0.017	55	25	0.476	6.19652
Aplan-11-3664-Thy_vs_Aplan-11-3664-Tail	chr9	122167348	122167348	G	C	Snrk	c.2192G>C	p.Arg731Pro	missense_variant	MODERATE	68	0	0.018	116	61	0.527	5.78269
Aplan-11-3664-Thy_vs_Aplan-11-3664-Tail	chr9	123660568	123660568	C	G	Slc6a20a	c.409G>C	p.Glu137Gln	missense_variant	MODERATE	100	1	0.022	154	74	0.49	5.88258
Aplan-11-3664-Thy_vs_Aplan-11-3664-Tail	chr9	124125281	124125281	G	C	Ccr5	c.920G>C	p.Arg307Pro	missense_variant	MODERATE	144	1	0.007809	229	113	0.48	5.7275
Aplan-11-3664-Thy_vs_Aplan-11-3664-Tail	chr10	4369626	4369626	G	C	Zbtb2	c.399C>G	p.Tyr133*	stop_gained	HIGH	76	0	0.015	111	65	0.565	5.71612
Aplan-11-3664-Thy_vs_Aplan-11-3664-Tail	chr10	13127676	13127676	G	C	Plagl1	c.687G>C	p.Ala229Ala	synonymous_variant	LOW	58	0	0.021	67	28	0.404	6.05935
Aplan-11-3664-Thy_vs_Aplan-11-3664-Tail	chr10	13652883	13652883	G	C	Aig1	c.*19C>G		3_prime_UTR_variant	MODIFIER	119	0	0.011	168	65	0.399	5.79856
Aplan-11-3664-Thy_vs_Aplan-11-3664-Tail	chr10	19759393	19759393	G	C	Il20ra	c.1381G>C	p.Glu461Gln	missense_variant	MODERATE	69	0	0.017	112	47	0.399	6.32861
Aplan-11-3664-Thy_vs_Aplan-11-3664-Tail	chr10	34607882	34607882	G	C	Frk	c.1238G>C	p.Arg413Pro	missense_variant	MODERATE	98	0	0.012	139	66	0.496	5.77727
Aplan-11-3664-Thy_vs_Aplan-11-3664-Tail	chr10	40293153	40293153	G	C	Amd1	c.427+11C>G		intron_variant	MODIFIER	50	0	0.024	58	25	0.422	6.40858
Aplan-11-3664-Thy_vs_Aplan-11-3664-Tail	chr10	61300285	61300285	G	C	Prf1	c.339G>C	p.Thr113Thr	synonymous_variant	LOW	35	0	0.032	40	18	0.462	5.50425
Aplan-11-3664-Thy_vs_Aplan-11-3664-Tail	chr10	61302924	61302924	G	C	Prf1	c.660G>C	p.Thr220Thr	synonymous_variant	LOW	61	0	0.019	71	18	0.246	5.32639
Aplan-11-3664-Thy_vs_Aplan-11-3664-Tail	chr10	61342824	61342824	G	C	Pald1	c.1704C>G	p.Pro568Pro	synonymous_variant	LOW	23	0	0.048	39	21	0.514	5.41401
Aplan-11-3664-Thy_vs_Aplan-11-3664-Tail	chr10	71027884	71027884	C	G	Bicc1	c.313+14G>C		intron_variant	MODIFIER	105	0	0.011	125	41	0.316	5.87091
Aplan-11-3664-Thy_vs_Aplan-11-3664-Tail	chr10	75509749	75509749	G	C	Gucd1	c.471C>G	p.Cys157Trp	missense_variant	MODERATE	20	0	0.053	44	21	0.462	4.05608
Aplan-11-3664-Thy_vs_Aplan-11-3664-Tail	chr10	75578845	75578845	G	C	Ggt1	c.496G>C	p.Gly166Arg	missense_variant	MODERATE	32	0	0.04	45	24	0.524	6.14376
Aplan-11-3664-Thy_vs_Aplan-11-3664-Tail	chr10	78168871	78168871	G	C	D10Jhu81e	c.240C>G	p.Pro80Pro	synonymous_variant	LOW	46	0	0.028	57	26	0.439	6.36916
Aplan-11-3664-Thy_vs_Aplan-11-3664-Tail	chr10	79756915	79756915	G	C	Fgf22	c.443G>C	p.Arg148Pro	missense_variant	MODERATE	21	0	0.045	21	8	0.333	2.46242
Aplan-11-3664-Thy_vs_Aplan-11-3664-Tail	chr10	79866465	79866465	G	C	Plppr3	c.772C>G	p.Pro258Ala	missense_variant	MODERATE	37	0	0.029	71	39	0.537	6.27611
Aplan-11-3664-Thy_vs_Aplan-11-3664-Tail	chr10	79867120	79867120	C	G	Ptbp1	c.*3843C>G		downstream_gene_variant	MODIFIER	10	0	0.083	17	11	0.626	2.97681
Aplan-11-3664-Thy_vs_Aplan-11-3664-Tail	chr10	79919480	79919480	G	C	Kiss1r	c.298G>C	p.Ala100Pro	missense_variant	MODERATE	23	0	0.053	33	12	0.407	3.14402
Aplan-11-3664-Thy_vs_Aplan-11-3664-Tail	chr10	79931180	79931180	G	C	Arid3a	c.287G>C	p.Arg96Pro	missense_variant	MODERATE	31	0	0.038	51	29	0.559	6.1581
Aplan-11-3664-Thy_vs_Aplan-11-3664-Tail	chr10	80002891	80002891	G	C	Abca7	c.1897G>C	p.Ala633Pro	missense_variant	MODERATE	36	0	0.029	84	43	0.525	6.03423
Aplan-11-3664-Thy_vs_Aplan-11-3664-Tail	chr10	80013641	80013641	G	C	Abca7	c.5635G>C	p.Ala1879Pro	missense_variant	MODERATE	33	0	0.037	34	18	0.531	6.46081
Aplan-11-3664-Thy_vs_Aplan-11-3664-Tail	chr10	80014527	80014527	G	C	Abca7	c.6053G>C	p.Arg2018Pro	missense_variant	MODERATE	37	0	0.033	43	17	0.384	5.36586
Aplan-11-3664-Thy_vs_Aplan-11-3664-Tail	chr10	80015301	80015301	G	C	Abca7	c.6328-5G>C		splice_region_variant&intron_variant	LOW	29	0	0.036	46	13	0.35	2.95622
Aplan-11-3664-Thy_vs_Aplan-11-3664-Tail	chr10	80131787	80131787	C	G	Cbarp	c.1598G>C	p.Arg533Pro	missense_variant	MODERATE	64	0	0.019	86	47	0.564	6.01378
Aplan-11-3664-Thy_vs_Aplan-11-3664-Tail	chr10	80325991	80325991	C	A	Pcsk4	c.466G>T	p.Asp156Tyr	missense_variant	MODERATE	72	0	0.016	71	26	0.385	5.83562
Aplan-11-3664-Thy_vs_Aplan-11-3664-Tail	chr10	80381270	80381270	G	C	Mex3d	c.2112C>G	p.Pro704Pro	synonymous_variant	LOW	13	0	0.07	29	10	0.4	1.7389
Aplan-11-3664-Thy_vs_Aplan-11-3664-Tail	chr10	81242763	81242763	G	C	Zfr2	c.835-7G>C		splice_region_variant&intron_variant	LOW	27	0	0.043	26	15	0.6	5.90794
Aplan-11-3664-Thy_vs_Aplan-11-3664-Tail	chr10	81262786	81262786	G	C	Matk	c.1442G>C	p.Arg481Pro	missense_variant	MODERATE	14	0	0.077	24	9	0.435	1.84508
Aplan-11-3664-Thy_vs_Aplan-11-3664-Tail	chr10	81281417	81281417	G	C	Tjp3	c.304C>G	p.Arg102Gly	missense_variant	MODERATE	13	0	0.07	27	9	0.36	1.71057
Aplan-11-3664-Thy_vs_Aplan-11-3664-Tail	chr10	84622482	84622482	G	C	Polr3b	c.16G>C	p.Glu6Gln	missense_variant	MODERATE	44	0	0.028	57	24	0.439	6.17531
Aplan-11-3664-Thy_vs_Aplan-11-3664-Tail	chr10	87567423	87567423	G	C	Pah	c.659G>C	p.Arg220Pro	missense_variant	MODERATE	35	0	0.031	28	7	0.283	2.66957
Aplan-11-3664-Thy_vs_Aplan-11-3664-Tail	chr10	89645518	89645518	G	C	Scyl2	c.1969C>G	p.Leu657Val	missense_variant	MODERATE	135	0	0.008011	177	83	0.473	5.90323
Aplan-11-3664-Thy_vs_Aplan-11-3664-Tail	chr10	93284834	93284834	G	C	Elk3	c.142C>G	p.Arg48Gly	missense_variant	MODERATE	34	0	0.031	51	26	0.488	6.29206
Aplan-11-3664-Thy_vs_Aplan-11-3664-Tail	chr10	106927725	106927725	G	C	Ppfia2	c.3578G>C	p.Arg1193Pro	missense_variant	MODERATE	28	0	0.042	49	28	0.511	6.72866
Aplan-11-3664-Thy_vs_Aplan-11-3664-Tail	chr10	115414050	115414050	C	G	Zfc3h1	c.3568C>G	p.Arg1190Gly	missense_variant	MODERATE	158	0	0.00773	216	104	0.46	5.88111
Aplan-11-3664-Thy_vs_Aplan-11-3664-Tail	chr10	116341520	116341520	G	C	Ptprb	c.3124G>C	p.Val1042Leu	missense_variant	MODERATE	82	0	0.014	116	20	0.209	4.85593
Aplan-11-3664-Thy_vs_Aplan-11-3664-Tail	chr10	117751466	117751466	G	C	Nup107	c.2527C>G	p.Arg843Gly	missense_variant	MODERATE	23	0	0.044	48	21	0.45	4.27929
Aplan-11-3664-Thy_vs_Aplan-11-3664-Tail	chr10	121606894	121606894	G	C	Xpot	c.1453-54C>G		intron_variant	MODIFIER	30	0	0.033	63	31	0.464	6.18919
Aplan-11-3664-Thy_vs_Aplan-11-3664-Tail	chr10	127193226	127193226	G	C	Dtx3	c.133C>G	p.Arg45Gly	missense_variant	MODERATE	13	0	0.071	28	10	0.385	1.76518
Aplan-11-3664-Thy_vs_Aplan-11-3664-Tail	chr10	127664710	127664710	G	A	Nab2	c.512C>T	p.Ser171Leu	missense_variant	MODERATE	30	0	0.034	43	13	0.263	3.32931
Aplan-11-3664-Thy_vs_Aplan-11-3664-Tail	chr10	127729425	127729425	G	C	Tac2	c.296-51G>C		intron_variant	MODIFIER	83	0	0.014	121	54	0.441	6.14099
Aplan-11-3664-Thy_vs_Aplan-11-3664-Tail	chr10	127742647	127742647	G	C	Zbtb39	c.1089G>C	p.Ala363Ala	synonymous_variant	LOW	48	0	0.022	76	32	0.416	6.43554
Aplan-11-3664-Thy_vs_Aplan-11-3664-Tail	chr10	128310208	128310208	C	G	Pan2	c.957C>G	p.Asn319Lys	missense_variant	MODERATE	67	0	0.018	67	26	0.407	5.91548
Aplan-11-3664-Thy_vs_Aplan-11-3664-Tail	chr11	3715256	3715256	G	C	Osbp2	c.1468-22C>G		intron_variant	MODIFIER	50	1	0.023	53	24	0.47	6.46036
Aplan-11-3664-Thy_vs_Aplan-11-3664-Tail	chr11	4738895	4738895	C	G	Cabp7	c.574G>C	p.Ala192Pro	missense_variant	MODERATE	22	0	0.048	25	12	0.518	3.95117
Aplan-11-3664-Thy_vs_Aplan-11-3664-Tail	chr11	4799887	4799887	G	A	Nf2	c.784C>T	p.Arg262*	stop_gained	HIGH	36	0	0.032	71	31	0.433	6.25891
Aplan-11-3664-Thy_vs_Aplan-11-3664-Tail	chr11	5286243	5286243	C	G	Znrf3	c.754G>C	p.Ala252Pro	missense_variant	MODERATE	47	0	0.027	42	20	0.447	6.10307
Aplan-11-3664-Thy_vs_Aplan-11-3664-Tail	chr11	5871536	5871536	G	C	Aebp1	c.3077G>C	p.Arg1026Pro	missense_variant	MODERATE	27	0	0.043	37	16	0.457	4.25928
Aplan-11-3664-Thy_vs_Aplan-11-3664-Tail	chr11	6401117	6401117	C	G	Zmiz2	c.1722C>G	p.Ser574Arg	missense_variant	MODERATE	63	0	0.02	96	32	0.349	5.94418
Aplan-11-3664-Thy_vs_Aplan-11-3664-Tail	chr11	6516117	6516117	C	G	Myo1g	c.1051G>C	p.Val351Leu	missense_variant	MODERATE	44	0	0.024	49	22	0.489	6.90551
Aplan-11-3664-Thy_vs_Aplan-11-3664-Tail	chr11	6599143	6599143	C	G	Nacad	c.3907G>C	p.Ala1303Pro	missense_variant	MODERATE	36	0	0.031	28	15	0.514	6.62945
Aplan-11-3664-Thy_vs_Aplan-11-3664-Tail	chr11	6599183	6599183	C	G	Nacad	c.3867G>C	p.Ser1289Ser	synonymous_variant	LOW	34	0	0.034	23	12	0.5	5.71859
Aplan-11-3664-Thy_vs_Aplan-11-3664-Tail	chr11	6676663	6676663	G	C	Ramp3	c.369G>C	p.Ala123Ala	synonymous_variant	LOW	19	0	0.053	25	11	0.455	3.04955
Aplan-11-3664-Thy_vs_Aplan-11-3664-Tail	chr11	8836395	8836395	C	G	Tns3-Hus1	n.8836395C>G		intergenic_region	MODIFIER	48	0	0.023	54	27	0.492	6.09857
Aplan-11-3664-Thy_vs_Aplan-11-3664-Tail	chr11	9335105	9335105	G	C	Abca13	c.9764-26G>C		intron_variant	MODIFIER	92	0	0.012	122	62	0.499	5.79627
Aplan-11-3664-Thy_vs_Aplan-11-3664-Tail	chr11	11282668	11282668	G	C	Zpbp	c.1162C>G	p.Arg388Gly	missense_variant	MODERATE	56	0	0.022	70	38	0.576	6.33378
Aplan-11-3664-Thy_vs_Aplan-11-3664-Tail	chr11	11754069	11754069	C	G	Ikzf1	c.484C>G	p.Arg162Gly	missense_variant	MODERATE	39	0	0.032	36	10	0.296	3.51337
Aplan-11-3664-Thy_vs_Aplan-11-3664-Tail	chr11	23731284	23731284	C	G	Pus10	c.1546-37C>G		intron_variant	MODIFIER	157	0	0.007767	175	80	0.461	5.85157
Aplan-11-3664-Thy_vs_Aplan-11-3664-Tail	chr11	30977421	30977421	G	C	Chac2	c.497C>G	p.Ser166Cys	missense_variant	MODERATE	80	1	0.016	101	42	0.412	5.95677
Aplan-11-3664-Thy_vs_Aplan-11-3664-Tail	chr11	32516251	32516251	C	G	Ubtd2	c.469C>G	p.Arg157Gly	missense_variant	MODERATE	56	0	0.02	79	36	0.47	5.99563
Aplan-11-3664-Thy_vs_Aplan-11-3664-Tail	chr11	46161814	46161814	G	T	Nipal4	c.283+40C>A		intron_variant	MODIFIER	25	0	0.039	47	23	0.528	5.13544
Aplan-11-3664-Thy_vs_Aplan-11-3664-Tail	chr11	46528594	46528594	G	C	Gm12169	c.236G>C	p.Arg79Pro	missense_variant	MODERATE	75	0	0.015	145	68	0.459	5.87669
Aplan-11-3664-Thy_vs_Aplan-11-3664-Tail	chr11	48838897	48838897	C	G	Trim7	c.-46C>G		5_prime_UTR_variant	MODIFIER	37	0	0.028	44	19	0.444	5.83699
Aplan-11-3664-Thy_vs_Aplan-11-3664-Tail	chr11	49630634	49630634	G	C	Flt4	c.1380G>C	p.Trp460Cys	missense_variant	MODERATE	59	0	0.018	90	35	0.411	6.08714
Aplan-11-3664-Thy_vs_Aplan-11-3664-Tail	chr11	50859304	50859304	G	C	Grm6	c.1384G>C	p.Gly462Arg	missense_variant	MODERATE	34	0	0.033	70	31	0.434	6.40629
Aplan-11-3664-Thy_vs_Aplan-11-3664-Tail	chr11	51253969	51253969	C	G	BC049762	c.316G>C	p.Ala106Pro	missense_variant	MODERATE	45	0	0.024	37	21	0.625	5.92079
Aplan-11-3664-Thy_vs_Aplan-11-3664-Tail	chr11	53772906	53772906	C	G	Irf1	c.155C>G	p.Ala52Gly	missense_variant	MODERATE	25	0	0.043	35	10	0.357	2.46512
Aplan-11-3664-Thy_vs_Aplan-11-3664-Tail	chr11	53951282	53951282	G	C	Slc22a21	c.1669C>G	p.Arg557Gly	missense_variant	MODERATE	80	0	0.016	108	48	0.45	5.90249
Aplan-11-3664-Thy_vs_Aplan-11-3664-Tail	chr11	55262422	55262422	G	C	Fat2	c.10963C>G	p.Arg3655Gly	missense_variant	MODERATE	43	0	0.024	51	24	0.469	6.16168
Aplan-11-3664-Thy_vs_Aplan-11-3664-Tail	chr11	55269451	55269451	C	G	Fat2	c.9835G>C	p.Gly3279Arg	missense_variant	MODERATE	24	0	0.039	28	8	0.307	2.29179
Aplan-11-3664-Thy_vs_Aplan-11-3664-Tail	chr11	58188006	58188006	C	T	Gm12250	c.248C>T	p.Thr83Met	missense_variant	MODERATE	61	0	0.017	58	29	0.491	5.93952
Aplan-11-3664-Thy_vs_Aplan-11-3664-Tail	chr11	59374171	59374171	G	C	Prss38	c.566C>G	p.Pro189Arg	missense_variant	MODERATE	97	2	0.026	117	54	0.457	5.75844
Aplan-11-3664-Thy_vs_Aplan-11-3664-Tail	chr11	60190392	60190392	C	G	Rai1	c.5281C>G	p.Arg1761Gly	missense_variant	MODERATE	35	0	0.032	32	17	0.516	6.7752
Aplan-11-3664-Thy_vs_Aplan-11-3664-Tail	chr11	60200520	60200520	G	C	Srebf1	c.3081C>G	p.Ala1027Ala	synonymous_variant	LOW	32	0	0.037	40	22	0.54	6.78374
Aplan-11-3664-Thy_vs_Aplan-11-3664-Tail	chr11	61450002	61450002	C	G	Rnf112	c.1459G>C	p.Ala487Pro	missense_variant	MODERATE	73	0	0.015	99	39	0.41	6.03976
Aplan-11-3664-Thy_vs_Aplan-11-3664-Tail	chr11	61684689	61684689	C	G	Fam83g	c.156C>G	p.Arg52Arg	synonymous_variant	LOW	18	0	0.056	23	10	0.444	2.68677
Aplan-11-3664-Thy_vs_Aplan-11-3664-Tail	chr11	61834891	61834891	G	C	Ulk2	c.358C>G	p.Arg120Gly	missense_variant	MODERATE	74	0	0.017	84	45	0.5	5.9727
Aplan-11-3664-Thy_vs_Aplan-11-3664-Tail	chr11	69668409	69668409	C	T	Eif4a1	c.764G>A	p.Arg255Gln	missense_variant	MODERATE	125	0	0.008783	153	89	0.583	5.86909
Aplan-11-3664-Thy_vs_Aplan-11-3664-Tail	chr11	69684463	69684463	C	G	Senp3	c.-3624G>C		upstream_gene_variant	MODIFIER	94	0	0.013	102	37	0.369	6.00618
Aplan-11-3664-Thy_vs_Aplan-11-3664-Tail	chr11	69850007	69850007	G	C	Plscr3	c.673-5G>C		splice_region_variant&intron_variant	LOW	25	0	0.042	44	22	0.462	5.2453
Aplan-11-3664-Thy_vs_Aplan-11-3664-Tail	chr11	69851897	69851897	C	G	Tnk1	c.1792-4G>C		splice_region_variant&intron_variant	LOW	76	0	0.015	100	57	0.56	5.7783
Aplan-11-3664-Thy_vs_Aplan-11-3664-Tail	chr11	69879664	69879664	C	G	Kctd11	c.547G>C	p.Gly183Arg	missense_variant	MODERATE	34	0	0.03	35	12	0.333	3.80447
Aplan-11-3664-Thy_vs_Aplan-11-3664-Tail	chr11	70397620	70397620	C	G	Pelp1	c.983+23G>C		intron_variant	MODIFIER	43	0	0.024	72	42	0.57	5.92007
Aplan-11-3664-Thy_vs_Aplan-11-3664-Tail	chr11	70999812	70999812	G	C	Dhx33	c.560C>G	p.Ala187Gly	missense_variant	MODERATE	54	1	0.039	67	37	0.581	6.41672
Aplan-11-3664-Thy_vs_Aplan-11-3664-Tail	chr11	72451011	72451011	C	G	Mybbp1a	c.3572C>G	p.Thr1191Arg	missense_variant	MODERATE	50	0	0.022	80	32	0.412	6.34494
Aplan-11-3664-Thy_vs_Aplan-11-3664-Tail	chr11	72924694	72924694	C	G	Zzef1	c.8653C>G	p.Arg2885Gly	missense_variant	MODERATE	37	0	0.029	51	23	0.476	6.20314
Aplan-11-3664-Thy_vs_Aplan-11-3664-Tail	chr11	74837484	74837484	C	G	Mnt	c.701+12C>G		intron_variant	MODIFIER	67	0	0.016	88	42	0.48	5.97111
Aplan-11-3664-Thy_vs_Aplan-11-3664-Tail	chr11	74858118	74858118	C	T	Sgsm2	c.1715G>A	p.Arg572His	missense_variant	MODERATE	35	0	0.031	39	14	0.406	4.41831
Aplan-11-3664-Thy_vs_Aplan-11-3664-Tail	chr11	74858626	74858626	C	G	Sgsm2	c.1653+3G>C		splice_region_variant&intron_variant	LOW	45	0	0.029	46	24	0.538	6.09217
Aplan-11-3664-Thy_vs_Aplan-11-3664-Tail	chr11	74865117	74865117	C	G	Sgsm2	c.1256G>C	p.Arg419Pro	missense_variant	MODERATE	33	0	0.033	33	20	0.6	5.86734
Aplan-11-3664-Thy_vs_Aplan-11-3664-Tail	chr11	74908232	74908232	C	G	Tsr1	c.2238C>G	p.Thr746Thr	synonymous_variant	LOW	113	0	0.009934	162	63	0.394	6.02097
Aplan-11-3664-Thy_vs_Aplan-11-3664-Tail	chr11	74930435	74930435	C	T	Smg6	c.1531C>T	p.Arg511Trp	missense_variant	MODERATE	78	0	0.016	106	39	0.39	5.9503
Aplan-11-3664-Thy_vs_Aplan-11-3664-Tail	chr11	75520891	75520891	G	C	Scarf1	c.1017-12G>C		intron_variant	MODIFIER	35	0	0.032	36	16	0.444	5.44969
Aplan-11-3664-Thy_vs_Aplan-11-3664-Tail	chr11	75776989	75776989	C	G	Doc2b	c.923+11G>C		intron_variant	MODIFIER	37	0	0.03	44	22	0.471	6.3218
Aplan-11-3664-Thy_vs_Aplan-11-3664-Tail	chr11	78054827	78054827	C	G	Flot2	c.258C>G	p.Asp86Glu	missense_variant	MODERATE	80	0	0.015	95	40	0.424	5.91082
Aplan-11-3664-Thy_vs_Aplan-11-3664-Tail	chr11	78314382	78314382	C	G	Spag5	c.1906C>G	p.Leu636Val	missense_variant	MODERATE	70	0	0.017	74	32	0.427	6.30232
Aplan-11-3664-Thy_vs_Aplan-11-3664-Tail	chr11	78314409	78314409	C	G	Spag5	c.1933C>G	p.Arg645Gly	missense_variant	MODERATE	74	0	0.016	72	26	0.344	6.23726
Aplan-11-3664-Thy_vs_Aplan-11-3664-Tail	chr11	78519195	78519195	C	G	Poldip2	c.802C>G	p.Arg268Gly	missense_variant	MODERATE	82	0	0.015	82	25	0.305	6.60309
Aplan-11-3664-Thy_vs_Aplan-11-3664-Tail	chr11	82811085	82811085	G	C	Rffl	c.723C>G	p.His241Gln	missense_variant	MODERATE	23	0	0.052	31	11	0.417	2.89647
Aplan-11-3664-Thy_vs_Aplan-11-3664-Tail	chr11	82957172	82957172	C	T	Slfn5	c.882C>T	p.Val294Val	synonymous_variant	LOW	56	0	0.021	84	38	0.458	5.82638
Aplan-11-3664-Thy_vs_Aplan-11-3664-Tail	chr11	83004177	83004177	G	C	Slfn8	c.1802C>G	p.Pro601Arg	missense_variant	MODERATE	163	1	0.014	250	118	0.475	5.83461
Aplan-11-3664-Thy_vs_Aplan-11-3664-Tail	chr11	83069639	83069639	C	G	Slfn2	c.443C>G	p.Pro148Arg	missense_variant	MODERATE	55	0	0.02	69	34	0.485	6.32671
Aplan-11-3664-Thy_vs_Aplan-11-3664-Tail	chr11	83429331	83429331	G	C	Gas2l2	c.98C>G	p.Ala33Gly	missense_variant	MODERATE	27	0	0.042	35	23	0.613	6.10662
Aplan-11-3664-Thy_vs_Aplan-11-3664-Tail	chr11	83864048	83864048	G	C	Hnf1b	c.915G>C	p.Lys305Asn	missense_variant	MODERATE	26	1	0.083	41	22	0.543	4.83258
Aplan-11-3664-Thy_vs_Aplan-11-3664-Tail	chr11	86561253	86561253	C	G	Tubd1	c.1045C>G	p.Arg349Gly	missense_variant	MODERATE	66	1	0.038	59	23	0.43	5.89086
Aplan-11-3664-Thy_vs_Aplan-11-3664-Tail	chr11	87426862	87426862	C	G	Tex14	c.-819C>G		upstream_gene_variant	MODIFIER	66	0	0.019	98	47	0.5	5.93363
Aplan-11-3664-Thy_vs_Aplan-11-3664-Tail	chr11	87443412	87443412	C	G	Mir8115	n.84-40315C>G		intron_variant	MODIFIER	36	0	0.03	45	15	0.351	4.19378
Aplan-11-3664-Thy_vs_Aplan-11-3664-Tail	chr11	87729566	87729566	G	C	Rnf43	c.849+5G>C		splice_region_variant&intron_variant	LOW	19	0	0.053	27	9	0.333	2.20829
Aplan-11-3664-Thy_vs_Aplan-11-3664-Tail	chr11	87771659	87771659	G	C	Bzrap1	c.1861G>C	p.Val621Leu	missense_variant&splice_region_variant	MODERATE	27	0	0.042	43	17	0.4	4.06074
Aplan-11-3664-Thy_vs_Aplan-11-3664-Tail	chr11	88169922	88169922	C	G	Cuedc1	c.90C>G	p.Gly30Gly	synonymous_variant	LOW	29	0	0.037	49	24	0.501	5.88261
Aplan-11-3664-Thy_vs_Aplan-11-3664-Tail	chr11	88170066	88170066	C	G	Cuedc1	c.234C>G	p.Ser78Arg	missense_variant	MODERATE	38	0	0.033	55	20	0.383	5.28104
Aplan-11-3664-Thy_vs_Aplan-11-3664-Tail	chr11	94645488	94645488	G	C	Eme1	c.1654C>G	p.Arg552Gly	missense_variant	MODERATE	55	0	0.02	99	17	0.205	3.16962
Aplan-11-3664-Thy_vs_Aplan-11-3664-Tail	chr11	95268540	95268540	G	C	Tac4	c.355G>C	p.Asp119His	missense_variant	MODERATE	29	0	0.041	36	25	0.636	6.33522
Aplan-11-3664-Thy_vs_Aplan-11-3664-Tail	chr11	95828782	95828782	G	C	Phospho1	c.45+7G>C		splice_region_variant&intron_variant	LOW	46	0	0.026	73	33	0.448	6.31868
Aplan-11-3664-Thy_vs_Aplan-11-3664-Tail	chr11	96713167	96713167	C	G	Skap1	c.782C>G	p.Thr261Ser	missense_variant	MODERATE	21	0	0.053	39	15	0.424	3.27898
Aplan-11-3664-Thy_vs_Aplan-11-3664-Tail	chr11	96853458	96853458	C	G	Copz2	c.195C>G	p.Ser65Ser	synonymous_variant	LOW	78	0	0.016	84	31	0.355	5.81969
Aplan-11-3664-Thy_vs_Aplan-11-3664-Tail	chr11	96935537	96935537	C	G	Prr15l	c.*689C>G		3_prime_UTR_variant	MODIFIER	31	0	0.034	49	19	0.368	4.67124
Aplan-11-3664-Thy_vs_Aplan-11-3664-Tail	chr11	97060492	97060492	G	C	Osbpl7	c.2004G>C	p.Thr668Thr	synonymous_variant	LOW	47	0	0.029	38	16	0.443	6.54874
Aplan-11-3664-Thy_vs_Aplan-11-3664-Tail	chr11	97335620	97335620	C	G	Gpr179	c.5708G>C	p.Gly1903Ala	missense_variant	MODERATE	42	0	0.026	76	43	0.543	6.10444
Aplan-11-3664-Thy_vs_Aplan-11-3664-Tail	chr11	97336087	97336087	C	G	Gpr179	c.5241G>C	p.Pro1747Pro	synonymous_variant	LOW	54	0	0.021	71	26	0.385	6.7785
Aplan-11-3664-Thy_vs_Aplan-11-3664-Tail	chr11	97337669	97337669	G	C	Gpr179	c.3659C>G	p.Ala1220Gly	missense_variant	MODERATE	88	0	0.014	122	49	0.404	6.07162
Aplan-11-3664-Thy_vs_Aplan-11-3664-Tail	chr11	97337758	97337758	C	G	Gpr179	c.3570G>C	p.Pro1190Pro	synonymous_variant	LOW	71	1	0.03	92	45	0.494	5.88301
Aplan-11-3664-Thy_vs_Aplan-11-3664-Tail	chr11	97337871	97337871	C	G	Gpr179	c.3457G>C	p.Glu1153Gln	missense_variant	MODERATE	58	0	0.02	69	30	0.441	6.37548
Aplan-11-3664-Thy_vs_Aplan-11-3664-Tail	chr11	97338173	97338173	G	C	Gpr179	c.3155C>G	p.Ala1052Gly	missense_variant	MODERATE	54	0	0.024	45	26	0.526	6.44618
Aplan-11-3664-Thy_vs_Aplan-11-3664-Tail	chr11	97338181	97338181	C	G	Gpr179	c.3147G>C	p.Glu1049Asp	missense_variant	MODERATE	54	0	0.024	45	27	0.553	5.97383
Aplan-11-3664-Thy_vs_Aplan-11-3664-Tail	chr11	97344167	97344167	C	G	Gpr179	c.1336G>C	p.Val446Leu	missense_variant	MODERATE	40	0	0.032	58	22	0.386	5.65218
Aplan-11-3664-Thy_vs_Aplan-11-3664-Tail	chr11	97691642	97691642	G	C	Cisd3	c.*3195G>C		downstream_gene_variant	MODIFIER	53	0	0.02	46	28	0.614	6.00789
Aplan-11-3664-Thy_vs_Aplan-11-3664-Tail	chr11	97693438	97693438	G	C	Pcgf2	c.90C>G	p.Thr30Thr	synonymous_variant	LOW	29	0	0.041	24	12	0.524	4.99413
Aplan-11-3664-Thy_vs_Aplan-11-3664-Tail	chr11	98769753	98769753	C	G	Nr1d1	c.1387G>C	p.Asp463His	missense_variant	MODERATE	39	0	0.03	36	13	0.387	4.73867
Aplan-11-3664-Thy_vs_Aplan-11-3664-Tail	chr11	98822946	98822946	C	G	Casc3	c.1003C>G	p.Arg335Gly	missense_variant	MODERATE	51	0	0.022	69	37	0.516	5.94962
Aplan-11-3664-Thy_vs_Aplan-11-3664-Tail	chr11	99145957	99145957	C	G	Ccr7	c.138G>C	p.Ser46Ser	synonymous_variant	LOW	57	0	0.019	104	47	0.459	6.34201
Aplan-11-3664-Thy_vs_Aplan-11-3664-Tail	chr11	99317430	99317430	G	C	Krt25	c.971C>G	p.Thr324Arg	missense_variant	MODERATE	32	0	0.037	40	8	0.264	2.13643
Aplan-11-3664-Thy_vs_Aplan-11-3664-Tail	chr11	100903732	100903732	C	G	Stat3	c.828G>C	p.Gln276His	missense_variant	MODERATE	41	0	0.026	97	46	0.474	5.99815
Aplan-11-3664-Thy_vs_Aplan-11-3664-Tail	chr11	101078811	101078811	C	G	Coasy	c.-4199C>G		upstream_gene_variant	MODIFIER	31	0	0.037	53	30	0.583	6.09067
Aplan-11-3664-Thy_vs_Aplan-11-3664-Tail	chr11	101471112	101471112	C	G	Rnd2	c.490C>G	p.Arg164Gly	missense_variant	MODERATE	38	0	0.028	49	12	0.295	3.06154
Aplan-11-3664-Thy_vs_Aplan-11-3664-Tail	chr11	101627555	101627555	C	G	Rdm1	c.-414C>G		upstream_gene_variant	MODIFIER	30	0	0.042	39	22	0.545	6.01165
Aplan-11-3664-Thy_vs_Aplan-11-3664-Tail	chr11	101658444	101658444	G	C	Rdm1-Arl4d	n.101658444G>C		intergenic_region	MODIFIER	20	0	0.053	38	18	0.518	4.09002
Aplan-11-3664-Thy_vs_Aplan-11-3664-Tail	chr11	102205319	102205319	C	G	Hdac5	c.1027G>C	p.Gly343Arg	missense_variant	MODERATE	48	0	0.024	53	23	0.442	5.76701
Aplan-11-3664-Thy_vs_Aplan-11-3664-Tail	chr11	102205607	102205607	C	G	Hdac5	c.827G>C	p.Arg276Pro	missense_variant	MODERATE	32	0	0.031	42	23	0.522	6.41773
Aplan-11-3664-Thy_vs_Aplan-11-3664-Tail	chr11	102457021	102457021	G	C	Itga2b	c.2653C>G	p.Arg885Gly	missense_variant	MODERATE	19	0	0.056	24	5	0.227	1.24999
Aplan-11-3664-Thy_vs_Aplan-11-3664-Tail	chr11	102460667	102460667	G	C	Itga2b	c.1750-26C>G		intron_variant	MODIFIER	39	0	0.028	71	14	0.229	2.72403
Aplan-11-3664-Thy_vs_Aplan-11-3664-Tail	chr11	102854766	102854766	G	C	Eftud2	c.1149+13C>G		intron_variant	MODIFIER	30	0	0.04	27	10	0.409	3.70916
Aplan-11-3664-Thy_vs_Aplan-11-3664-Tail	chr11	103199793	103199793	C	G	1700023F06Rik	c.692G>C	p.Arg231Pro	missense_variant	MODERATE	18	0	0.067	14	8	0.567	3.54439
Aplan-11-3664-Thy_vs_Aplan-11-3664-Tail	chr11	106186981	106186981	C	G	Strada	c.36+120G>C		intron_variant	MODIFIER	51	1	0.048	82	34	0.389	5.87588
Aplan-11-3664-Thy_vs_Aplan-11-3664-Tail	chr11	106405861	106405861	C	G	Ern1	c.2262G>C	p.Thr754Thr	synonymous_variant	LOW	38	0	0.03	69	43	0.6	6.49865
Aplan-11-3664-Thy_vs_Aplan-11-3664-Tail	chr11	106426868	106426868	C	G	Ern1	c.429G>C	p.Ser143Ser	synonymous_variant	LOW	59	0	0.023	70	34	0.519	6.19119
Aplan-11-3664-Thy_vs_Aplan-11-3664-Tail	chr11	106567817	106567817	C	G	Tex2	c.786G>C	p.Ala262Ala	synonymous_variant	LOW	50	2	0.047	55	22	0.444	4.92254
Aplan-11-3664-Thy_vs_Aplan-11-3664-Tail	chr11	107060460	107060460	G	T	Bptf	c.6295+12C>A		intron_variant	MODIFIER	25	0	0.045	36	16	0.414	4.29695
Aplan-11-3664-Thy_vs_Aplan-11-3664-Tail	chr11	107072704	107072704	G	C	Bptf	c.5318C>G	p.Pro1773Arg	missense_variant	MODERATE	107	1	0.022	151	59	0.387	5.9614
Aplan-11-3664-Thy_vs_Aplan-11-3664-Tail	chr11	114672224	114672224	C	G	Ttyh2	c.-3320C>G		upstream_gene_variant	MODIFIER	81	0	0.015	122	58	0.48	5.92936
Aplan-11-3664-Thy_vs_Aplan-11-3664-Tail	chr11	115243627	115243627	C	G	Tmem104	c.988C>G	p.Arg330Gly	missense_variant	MODERATE	67	0	0.017	81	16	0.219	4.24101
Aplan-11-3664-Thy_vs_Aplan-11-3664-Tail	chr11	115344335	115344335	C	G	Otop3	c.849C>G	p.Cys283Trp	missense_variant	MODERATE	31	0	0.033	44	19	0.429	5.23522
Aplan-11-3664-Thy_vs_Aplan-11-3664-Tail	chr11	115469778	115469778	C	G	Slc16a5	c.786C>G	p.Tyr262*	stop_gained	HIGH	51	0	0.023	88	40	0.48	6.31159
Aplan-11-3664-Thy_vs_Aplan-11-3664-Tail	chr11	115581806	115581806	C	G	Nup85	c.1461C>G	p.Leu487Leu	synonymous_variant	LOW	90	0	0.012	144	51	0.367	5.90883
Aplan-11-3664-Thy_vs_Aplan-11-3664-Tail	chr11	115608556	115608556	C	G	Mif4gd	c.499G>C	p.Gly167Arg	missense_variant	MODERATE	20	0	0.056	20	11	0.524	3.83771
Aplan-11-3664-Thy_vs_Aplan-11-3664-Tail	chr11	115616510	115616510	G	C	Mif4gd	c.-4526C>G		upstream_gene_variant	MODIFIER	42	0	0.026	67	28	0.442	6.12163
Aplan-11-3664-Thy_vs_Aplan-11-3664-Tail	chr11	115786279	115786279	C	G	Tmem94	c.376C>G	p.Arg126Gly	missense_variant	MODERATE	27	0	0.045	18	11	0.611	5.50374
Aplan-11-3664-Thy_vs_Aplan-11-3664-Tail	chr11	115820595	115820595	G	C	Tsen54	c.837G>C	p.Glu279Asp	missense_variant	MODERATE	52	0	0.022	47	11	0.237	3.85957
Aplan-11-3664-Thy_vs_Aplan-11-3664-Tail	chr11	116050073	116050073	C	G	Unk	c.659C>G	p.Pro220Arg	missense_variant	MODERATE	18	0	0.067	36	20	0.572	4.37397
Aplan-11-3664-Thy_vs_Aplan-11-3664-Tail	chr11	116291435	116291435	C	G	Exoc7	c.1655+19G>C		intron_variant	MODIFIER	24	1	0.077	23	14	0.55	4.54537
Aplan-11-3664-Thy_vs_Aplan-11-3664-Tail	chr11	116301134	116301134	G	C	Exoc7	c.610C>G	p.Arg204Gly	missense_variant	MODERATE	39	1	0.057	63	32	0.5	5.67301
Aplan-11-3664-Thy_vs_Aplan-11-3664-Tail	chr11	117141572	117141572	C	G	Sec14l1	c.213+5C>G		splice_region_variant&intron_variant	LOW	60	0	0.019	52	24	0.436	5.99078
Aplan-11-3664-Thy_vs_Aplan-11-3664-Tail	chr11	117723564	117723564	C	G	Tnrc6c	c.3013+14C>G		intron_variant	MODIFIER	19	0	0.048	21	9	0.45	2.84993
Aplan-11-3664-Thy_vs_Aplan-11-3664-Tail	chr11	117749289	117749289	C	G	Tnrc6c	c.4153C>G	p.Arg1385Gly	missense_variant	MODERATE	117	0	0.01	130	72	0.521	5.83767
Aplan-11-3664-Thy_vs_Aplan-11-3664-Tail	chr11	117862241	117862241	C	G	Tmem235	c.189C>G	p.Cys63Trp	missense_variant	MODERATE	51	0	0.024	45	20	0.432	6.02294
Aplan-11-3664-Thy_vs_Aplan-11-3664-Tail	chr11	118047161	118047161	C	G	Dnah17	c.10039G>C	p.Val3347Leu	missense_variant	MODERATE	35	0	0.032	52	24	0.488	6.10067
Aplan-11-3664-Thy_vs_Aplan-11-3664-Tail	chr11	118056886	118056886	C	G	Dnah17	c.9087G>C	p.Leu3029Leu	synonymous_variant	LOW	19	0	0.053	15	7	0.429	2.9222
Aplan-11-3664-Thy_vs_Aplan-11-3664-Tail	chr11	118056903	118056903	C	G	Dnah17	c.9070G>C	p.Ala3024Pro	missense_variant	MODERATE	20	0	0.053	19	8	0.412	2.91062
Aplan-11-3664-Thy_vs_Aplan-11-3664-Tail	chr11	118101255	118101255	C	G	Dnah17	c.3615+14G>C		intron_variant	MODIFIER	40	0	0.032	47	17	0.41	4.93212
Aplan-11-3664-Thy_vs_Aplan-11-3664-Tail	chr11	118396860	118396860	C	G	Lgals3bp	c.377-17G>C		intron_variant	MODIFIER	51	0	0.024	42	19	0.517	6.19178
Aplan-11-3664-Thy_vs_Aplan-11-3664-Tail	chr11	118481417	118481417	C	G	Engase	c.534C>G	p.Cys178Trp	missense_variant	MODERATE	25	0	0.04	35	12	0.408	3.14782
Aplan-11-3664-Thy_vs_Aplan-11-3664-Tail	chr11	118482640	118482640	G	C	Engase	c.808G>C	p.Gly270Arg	missense_variant	MODERATE	26	0	0.045	47	16	0.385	3.49595
Aplan-11-3664-Thy_vs_Aplan-11-3664-Tail	chr11	118487158	118487158	G	A	Engase	c.1856G>A	p.Arg619Gln	missense_variant	MODERATE	35	1	0.064	37	14	0.415	3.56832
Aplan-11-3664-Thy_vs_Aplan-11-3664-Tail	chr11	119155142	119155142	C	G	Tbc1d16	c.1478G>C	p.Arg493Pro	missense_variant	MODERATE	42	0	0.027	39	10	0.295	3.4705
Aplan-11-3664-Thy_vs_Aplan-11-3664-Tail	chr11	119155985	119155985	C	G	Mir6934	n.-1848G>C		upstream_gene_variant	MODIFIER	47	0	0.024	23	10	0.454	5.54002
Aplan-11-3664-Thy_vs_Aplan-11-3664-Tail	chr11	119157790	119157790	C	G	Tbc1d16	c.1036G>C	p.Glu346Gln	missense_variant	MODERATE	12	0	0.088	19	10	0.563	2.38859
Aplan-11-3664-Thy_vs_Aplan-11-3664-Tail	chr11	119158744	119158744	G	C	Tbc1d16	c.925C>G	p.Arg309Gly	missense_variant	MODERATE	15	0	0.071	26	9	0.391	1.81305
Aplan-11-3664-Thy_vs_Aplan-11-3664-Tail	chr11	119326752	119326752	C	G	Card14	c.1210C>G	p.Arg404Gly	missense_variant	MODERATE	11	0	0.1	17	5	0.312	0.903975
Aplan-11-3664-Thy_vs_Aplan-11-3664-Tail	chr11	119896453	119896453	C	T	Rptor	c.3843C>T	p.Asn1281Asn	synonymous_variant	LOW	19	0	0.058	33	11	0.387	2.39112
Aplan-11-3664-Thy_vs_Aplan-11-3664-Tail	chr11	120368026	120368026	G	C	Fscn2	c.1396G>C	p.Gly466Arg	missense_variant	MODERATE	30	0	0.038	30	16	0.52	5.71129
Aplan-11-3664-Thy_vs_Aplan-11-3664-Tail	chr11	120488151	120488151	C	G	Mrpl12	c.406C>G	p.Arg136Gly	missense_variant	MODERATE	37	0	0.03	41	13	0.324	4.01742
Aplan-11-3664-Thy_vs_Aplan-11-3664-Tail	chr11	120497870	120497870	C	G	Slc25a10	c.703-50C>G		intron_variant	MODIFIER	23	0	0.042	52	22	0.454	4.17967
Aplan-11-3664-Thy_vs_Aplan-11-3664-Tail	chr11	120641187	120641187	C	G	Pycr1	c.752G>C	p.Arg251Pro	missense_variant	MODERATE	21	0	0.047	29	15	0.482	4.44394
Aplan-11-3664-Thy_vs_Aplan-11-3664-Tail	chr11	120715842	120715842	G	C	Lrrc45	c.569G>C	p.Arg190Pro	missense_variant	MODERATE	31	0	0.038	34	17	0.483	5.85658
Aplan-11-3664-Thy_vs_Aplan-11-3664-Tail	chr11	120816590	120816590	G	C	Fasn	c.2420+32C>G		intron_variant	MODIFIER	54	0	0.022	47	20	0.425	5.97514
Aplan-11-3664-Thy_vs_Aplan-11-3664-Tail	chr12	17301194	17301194	G	C	Atp6v1c2	c.335C>G	p.Thr112Arg	missense_variant	MODERATE	36	0	0.032	50	16	0.308	3.99141
Aplan-11-3664-Thy_vs_Aplan-11-3664-Tail	chr12	28553902	28553902	C	G	Allc	c.1181G>C	p.Arg394Pro	missense_variant	MODERATE	17	0	0.063	32	15	0.428	3.1793
Aplan-11-3664-Thy_vs_Aplan-11-3664-Tail	chr12	29990761	29990761	G	C	Pxdn	c.1035G>C	p.Pro345Pro	synonymous_variant	LOW	45	0	0.025	41	8	0.22	2.74455
Aplan-11-3664-Thy_vs_Aplan-11-3664-Tail	chr12	32848671	32848671	C	G	Nampt	c.1285C>G	p.Arg429Gly	missense_variant	MODERATE	67	1	0.035	110	58	0.535	5.86049
Aplan-11-3664-Thy_vs_Aplan-11-3664-Tail	chr12	54898788	54898788	G	C	Baz1a	c.3781C>G	p.Arg1261Gly	missense_variant	MODERATE	41	0	0.029	56	31	0.522	6.33502
Aplan-11-3664-Thy_vs_Aplan-11-3664-Tail	chr12	59081849	59081849	C	G	Pnn-Mia2	n.59081849C>G		intergenic_region	MODIFIER	47	0	0.022	110	59	0.533	6.2397
Aplan-11-3664-Thy_vs_Aplan-11-3664-Tail	chr12	59108463	59108463	G	C	Mia2	c.964G>C	p.Glu322Gln	missense_variant	MODERATE	52	2	0.061	90	40	0.446	6.06159
Aplan-11-3664-Thy_vs_Aplan-11-3664-Tail	chr12	66284236	66284236	G	C	Rpl10l	c.122C>G	p.Ala41Gly	missense_variant	MODERATE	58	1	0.038	77	38	0.484	6.12719
Aplan-11-3664-Thy_vs_Aplan-11-3664-Tail	chr12	70056012	70056012	C	G	Nin	c.841G>C	p.Ala281Pro	missense_variant	MODERATE	43	0	0.028	42	11	0.286	3.6976
Aplan-11-3664-Thy_vs_Aplan-11-3664-Tail	chr12	75966608	75966608	G	C	Syne2	c.8572G>C	p.Ala2858Pro	missense_variant	MODERATE	68	0	0.016	101	23	0.256	5.4769
Aplan-11-3664-Thy_vs_Aplan-11-3664-Tail	chr12	76612779	76612779	C	G	Sptb	c.3346G>C	p.Asp1116His	missense_variant	MODERATE	56	0	0.021	90	45	0.499	6.07422
Aplan-11-3664-Thy_vs_Aplan-11-3664-Tail	chr12	87127405	87127405	G	C	Pomt2	c.1223C>G	p.Ala408Gly	missense_variant	MODERATE	33	0	0.036	29	12	0.423	4.61935
Aplan-11-3664-Thy_vs_Aplan-11-3664-Tail	chr12	90204750	90204750	G	C	Nrxn3	c.3946G>C	p.Val1316Leu	missense_variant	MODERATE	121	1	0.021	114	46	0.417	5.93715
Aplan-11-3664-Thy_vs_Aplan-11-3664-Tail	chr12	90204773	90204773	G	C	Nrxn3	c.3969G>C	p.Met1323Ile	missense_variant	MODERATE	114	1	0.022	105	39	0.396	5.95556
Aplan-11-3664-Thy_vs_Aplan-11-3664-Tail	chr12	100061554	100061554	G	C	Kcnk13	c.887G>C	p.Ser296Thr	missense_variant	MODERATE	102	0	0.012	114	62	0.547	6.02599
Aplan-11-3664-Thy_vs_Aplan-11-3664-Tail	chr12	100923333	100923333	G	C	Ccdc88c	c.4450C>G	p.Arg1484Gly	missense_variant	MODERATE	14	0	0.091	15	6	0.384	1.77319
Aplan-11-3664-Thy_vs_Aplan-11-3664-Tail	chr12	102899365	102899365	G	C	Cox8c	c.-1G>C		5_prime_UTR_variant	MODIFIER	56	1	0.044	83	42	0.508	6.24669
Aplan-11-3664-Thy_vs_Aplan-11-3664-Tail	chr12	107916026	107916026	G	C	Bcl11b	c.2029C>G	p.Arg677Gly	missense_variant	MODERATE	27	1	0.083	14	9	0.595	4.30885
Aplan-11-3664-Thy_vs_Aplan-11-3664-Tail	chr12	107917114	107917114	G	C	Bcl11b	c.941C>G	p.Pro314Arg	missense_variant	MODERATE	22	0	0.045	23	8	0.364	2.42502
Aplan-11-3664-Thy_vs_Aplan-11-3664-Tail	chr12	109727367	109727367	G	C	Mir539	n.-762G>C		upstream_gene_variant	MODIFIER	19	0	0.058	33	23	0.643	6.09048
Aplan-11-3664-Thy_vs_Aplan-11-3664-Tail	chr12	110939783	110939783	C	G	Tecpr2	c.2818C>G	p.Arg940Gly	missense_variant	MODERATE	12	0	0.083	13	6	0.461	1.82661
Aplan-11-3664-Thy_vs_Aplan-11-3664-Tail	chr12	111296384	111296384	C	G	Cdc42bpb	c.4508G>C	p.Arg1503Pro	missense_variant	MODERATE	78	1	0.017	96	41	0.437	6.15682
Aplan-11-3664-Thy_vs_Aplan-11-3664-Tail	chr12	112915406	112915406	C	G	Jag2	c.1429-35G>C		intron_variant	MODIFIER	49	0	0.024	47	27	0.538	6.13921
Aplan-11-3664-Thy_vs_Aplan-11-3664-Tail	chr12	112915633	112915633	C	G	Jag2	c.1353G>C	p.Pro451Pro	synonymous_variant	LOW	40	0	0.028	48	18	0.409	5.31603
Aplan-11-3664-Thy_vs_Aplan-11-3664-Tail	chr12	112916956	112916956	C	G	Mir6941	n.*3527G>C		downstream_gene_variant	MODIFIER	16	0	0.059	24	9	0.435	2.22525
Aplan-11-3664-Thy_vs_Aplan-11-3664-Tail	chr12	113152102	113152102	C	G	Crip1	c.-12C>G		5_prime_UTR_variant	MODIFIER	21	0	0.056	21	13	0.6	4.79729
Aplan-11-3664-Thy_vs_Aplan-11-3664-Tail	chr12	117184645	117184645	G	C	Ptprn2	c.2024G>C	p.Arg675Pro	missense_variant	MODERATE	22	0	0.057	29	14	0.5	4.14628
Aplan-11-3664-Thy_vs_Aplan-11-3664-Tail	chr13	22041339	22041339	G	C	Hist1h4i	c.-16C>G		5_prime_UTR_variant	MODIFIER	115	0	0.01	175	95	0.513	5.76674
Aplan-11-3664-Thy_vs_Aplan-11-3664-Tail	chr13	22043252	22043252	C	G	Hist1h2bj	c.23C>G	p.Ala8Gly	missense_variant	MODERATE	66	0	0.017	105	51	0.523	5.6777
Aplan-11-3664-Thy_vs_Aplan-11-3664-Tail	chr13	23555826	23555826	C	G	Hist1h4f	c.-4183G>C		upstream_gene_variant	MODIFIER	109	2	0.023	135	56	0.416	5.76367
Aplan-11-3664-Thy_vs_Aplan-11-3664-Tail	chr13	23746992	23746992	C	G	Hist1h2bb	c.198C>G	p.Phe66Leu	missense_variant	MODERATE	81	0	0.015	114	48	0.412	5.87121
Aplan-11-3664-Thy_vs_Aplan-11-3664-Tail	chr13	32717505	32717505	G	C	Mylk4	c.761+45C>G		intron_variant	MODIFIER	115	1	0.021	157	60	0.389	6.15611
Aplan-11-3664-Thy_vs_Aplan-11-3664-Tail	chr13	37893939	37893939	C	G	Rreb1	c.126C>G	p.Ser42Ser	synonymous_variant	LOW	48	0	0.024	87	43	0.493	6.14395
Aplan-11-3664-Thy_vs_Aplan-11-3664-Tail	chr13	43419665	43419665	C	G	Ranbp9	c.1382G>C	p.Arg461Pro	missense_variant	MODERATE	98	0	0.013	125	68	0.548	6.04968
Aplan-11-3664-Thy_vs_Aplan-11-3664-Tail	chr13	49070791	49070791	C	A	Wnk2	c.3519G>T	p.Pro1173Pro	synonymous_variant	LOW	71	0	0.016	102	45	0.423	5.97751
Aplan-11-3664-Thy_vs_Aplan-11-3664-Tail	chr13	49248404	49248404	C	G	Susd3	c.-272G>C		upstream_gene_variant	MODIFIER	45	0	0.027	56	23	0.413	6.5434
Aplan-11-3664-Thy_vs_Aplan-11-3664-Tail	chr13	52631666	52631666	C	G	Syk	c.907C>G	p.Pro303Ala	missense_variant	MODERATE	22	0	0.053	44	26	0.609	5.84082
Aplan-11-3664-Thy_vs_Aplan-11-3664-Tail	chr13	55379439	55379439	C	G	Rgs14	c.620C>G	p.Ala207Gly	missense_variant	MODERATE	29	0	0.039	39	20	0.469	5.9351
Aplan-11-3664-Thy_vs_Aplan-11-3664-Tail	chr13	55420180	55420180	C	G	F12	c.1414G>C	p.Gly472Arg	missense_variant	MODERATE	41	0	0.025	61	30	0.51	6.51119
Aplan-11-3664-Thy_vs_Aplan-11-3664-Tail	chr13	57923229	57923229	C	G	Spock1-Klhl3	n.57923229C>G		intergenic_region	MODIFIER	36	0	0.034	52	24	0.476	5.96854
Aplan-11-3664-Thy_vs_Aplan-11-3664-Tail	chr13	63033225	63033225	C	G	2010111I01Rik	c.964+36C>G		intron_variant	MODIFIER	50	0	0.024	77	22	0.313	5.29587
Aplan-11-3664-Thy_vs_Aplan-11-3664-Tail	chr13	73617641	73617641	C	G	Clptm1l	c.1374+8C>G		splice_region_variant&intron_variant	LOW	67	0	0.018	144	76	0.537	6.31137
Aplan-11-3664-Thy_vs_Aplan-11-3664-Tail	chr13	73989055	73989055	G	C	Zdhhc11	c.948-2984G>C		intron_variant	MODIFIER	100	0	0.012	134	62	0.459	5.95185
Aplan-11-3664-Thy_vs_Aplan-11-3664-Tail	chr13	77999595	77999595	C	G	Fam172a	c.919C>G	p.Arg307Gly	missense_variant	MODERATE	64	0	0.019	93	20	0.232	4.89456
Aplan-11-3664-Thy_vs_Aplan-11-3664-Tail	chr13	81283416	81283416	G	C	Adgrv1	c.17892C>G	p.Ser5964Ser	synonymous_variant	LOW	37	0	0.031	49	22	0.474	6.39099
Aplan-11-3664-Thy_vs_Aplan-11-3664-Tail	chr13	93625452	93625452	G	C	Bhmt	c.322C>G	p.Arg108Gly	missense_variant	MODERATE	117	0	0.011	176	88	0.493	5.67325
Aplan-11-3664-Thy_vs_Aplan-11-3664-Tail	chr13	93939361	93939361	C	G	Arsb	c.1339+12C>G		intron_variant	MODIFIER	58	0	0.021	56	27	0.531	6.46772
Aplan-11-3664-Thy_vs_Aplan-11-3664-Tail	chr13	100444192	100444192	T	C	Naip1	c.546A>G	p.Ser182Ser	synonymous_variant	LOW	187	0	0.005892	259	80	0.301	5.81898
Aplan-11-3664-Thy_vs_Aplan-11-3664-Tail	chr13	113078779	113078779	G	C	Cdc20b	c.880G>C	p.Glu294Gln	missense_variant	MODERATE	45	0	0.025	85	32	0.417	6.08497
Aplan-11-3664-Thy_vs_Aplan-11-3664-Tail	chr13	115007016	115007016	C	G	Itga1	c.978G>C	p.Glu326Asp	missense_variant	MODERATE	108	0	0.012	139	62	0.462	5.84047
Aplan-11-3664-Thy_vs_Aplan-11-3664-Tail	chr14	18280051	18280051	G	C	Nkiras1	c.441G>C	p.Trp147Cys	missense_variant	MODERATE	60	0	0.018	79	36	0.493	6.39347
Aplan-11-3664-Thy_vs_Aplan-11-3664-Tail	chr14	20524003	20524003	G	C	Ppp3cb	c.766C>G	p.His256Asp	missense_variant	MODERATE	53	0	0.022	86	47	0.538	6.01799
Aplan-11-3664-Thy_vs_Aplan-11-3664-Tail	chr14	20679679	20679679	G	C	Sec24c	c.308+16G>C		intron_variant	MODIFIER	46	0	0.026	58	22	0.418	6.10023
Aplan-11-3664-Thy_vs_Aplan-11-3664-Tail	chr14	27087545	27087545	C	G	Il17rd	c.429+28C>G		intron_variant	MODIFIER	23	0	0.047	32	13	0.451	3.56868
Aplan-11-3664-Thy_vs_Aplan-11-3664-Tail	chr14	30043093	30043093	G	C	Cacna1d	c.5926-7C>G		splice_region_variant&intron_variant	LOW	38	0	0.03	52	19	0.391	5.09158
Aplan-11-3664-Thy_vs_Aplan-11-3664-Tail	chr14	30604178	30604178	G	C	Prkcd	c.817C>G	p.Arg273Gly	missense_variant	MODERATE	41	0	0.028	50	24	0.447	5.77045
Aplan-11-3664-Thy_vs_Aplan-11-3664-Tail	chr14	31154645	31154645	G	C	Stab1	c.2611C>G	p.Arg871Gly	missense_variant	MODERATE	79	0	0.015	72	45	0.576	5.66456
Aplan-11-3664-Thy_vs_Aplan-11-3664-Tail	chr14	31222393	31222393	C	G	Sema3g	c.871C>G	p.Arg291Gly	missense_variant	MODERATE	39	0	0.03	57	26	0.472	6.78705
Aplan-11-3664-Thy_vs_Aplan-11-3664-Tail	chr14	31267822	31267822	G	C	Dnah1	c.9736C>G	p.Arg3246Gly	missense_variant	MODERATE	71	0	0.017	73	32	0.442	6.20674
Aplan-11-3664-Thy_vs_Aplan-11-3664-Tail	chr14	33970380	33970380	C	G	Zfp488	c.825G>C	p.Ala275Ala	synonymous_variant	LOW	39	0	0.033	43	12	0.282	3.63387
Aplan-11-3664-Thy_vs_Aplan-11-3664-Tail	chr14	34146545	34146545	C	G	Npy4r	c.785G>C	p.Arg262Pro	missense_variant	MODERATE	38	0	0.026	66	11	0.21	2.18519
Aplan-11-3664-Thy_vs_Aplan-11-3664-Tail	chr14	35580411	35580411	C	G	Grid1	c.2632C>G	p.Arg878Gly	missense_variant	MODERATE	56	0	0.02	72	36	0.482	6.57414
Aplan-11-3664-Thy_vs_Aplan-11-3664-Tail	chr14	41154664	41154664	C	G	Mbl1	c.271+47C>G		intron_variant	MODIFIER	39	0	0.03	42	9	0.216	2.59836
Aplan-11-3664-Thy_vs_Aplan-11-3664-Tail	chr14	46846374	46846374	G	C	Cgrrf1	c.570+42G>C		intron_variant	MODIFIER	52	0	0.021	81	33	0.428	5.98067
Aplan-11-3664-Thy_vs_Aplan-11-3664-Tail	chr14	50893207	50893207	G	C	Klhl33	c.49C>G	p.Arg17Gly	missense_variant	MODERATE	30	0	0.041	30	18	0.607	6.72814
Aplan-11-3664-Thy_vs_Aplan-11-3664-Tail	chr14	52490377	52490377	G	C	Olfr1507	c.586C>G	p.Arg196Gly	missense_variant	MODERATE	113	2	0.02	155	69	0.444	5.85953
Aplan-11-3664-Thy_vs_Aplan-11-3664-Tail	chr14	53294659	53294659	G	C	Olfr1507-Dad1	n.53294659G>C		intergenic_region	MODIFIER	26	1	0.071	32	14	0.443	3.21111
Aplan-11-3664-Thy_vs_Aplan-11-3664-Tail	chr14	54568934	54568934	G	C	Ajuba	c.1641C>G	p.Ile547Met	missense_variant	MODERATE	20	0	0.063	23	12	0.5	4.0161
Aplan-11-3664-Thy_vs_Aplan-11-3664-Tail	chr14	54758470	54758470	G	C	Slc7a8	c.474C>G	p.Ser158Ser	synonymous_variant	LOW	12	0	0.096	20	10	0.529	2.35744
Aplan-11-3664-Thy_vs_Aplan-11-3664-Tail	chr14	55063967	55063967	C	G	Zfhx2	c.6559G>C	p.Ala2187Pro	missense_variant	MODERATE	25	0	0.042	39	15	0.429	3.73786
Aplan-11-3664-Thy_vs_Aplan-11-3664-Tail	chr14	55495463	55495463	C	G	Lrrc16b	c.830C>G	p.Ala277Gly	missense_variant	MODERATE	20	0	0.059	29	11	0.417	2.86103
Aplan-11-3664-Thy_vs_Aplan-11-3664-Tail	chr14	55755157	55755157	C	G	Cideb	c.301G>C	p.Val101Leu	missense_variant	MODERATE	29	0	0.036	40	15	0.361	4.11595
Aplan-11-3664-Thy_vs_Aplan-11-3664-Tail	chr14	55864535	55864535	G	C	Nynrin	c.1660G>C	p.Glu554Gln	missense_variant	MODERATE	31	0	0.035	67	32	0.5	5.93886
Aplan-11-3664-Thy_vs_Aplan-11-3664-Tail	chr14	55866265	55866265	C	G	Nynrin	c.2444C>G	p.Ser815Trp	missense_variant	MODERATE	77	0	0.015	112	50	0.461	5.80812
Aplan-11-3664-Thy_vs_Aplan-11-3664-Tail	chr14	56424483	56424483	G	C	Rnf17	c.337G>C	p.Glu113Gln	missense_variant	MODERATE	146	0	0.009368	205	107	0.548	5.67847
Aplan-11-3664-Thy_vs_Aplan-11-3664-Tail	chr14	56587802	56587802	G	C	Parp4	c.382G>C	p.Glu128Gln	missense_variant	MODERATE	132	1	0.019	191	88	0.481	5.95949
Aplan-11-3664-Thy_vs_Aplan-11-3664-Tail	chr14	64727143	64727143	G	C	Kif13b	c.790G>C	p.Gly264Arg	missense_variant	MODERATE	31	0	0.039	41	17	0.5	4.91695
Aplan-11-3664-Thy_vs_Aplan-11-3664-Tail	chr14	65730886	65730886	G	C	Scara5	c.607G>C	p.Ala203Pro	missense_variant	MODERATE	15	0	0.067	21	11	0.5	3.15845
Aplan-11-3664-Thy_vs_Aplan-11-3664-Tail	chr14	70505353	70505353	G	C	Bmp1	c.955C>G	p.Arg319Gly	missense_variant	MODERATE	46	0	0.026	54	30	0.512	6.05528
Aplan-11-3664-Thy_vs_Aplan-11-3664-Tail	chr14	76237425	76237425	C	G	Nufip1-Tsc22d1	n.76237425C>G		intergenic_region	MODIFIER	60	0	0.02	73	32	0.439	6.48572
Aplan-11-3664-Thy_vs_Aplan-11-3664-Tail	chr14	78628082	78628082	C	G	Dgkh	c.459G>C	p.Val153Val	synonymous_variant	LOW	74	0	0.017	110	46	0.429	5.83185
Aplan-11-3664-Thy_vs_Aplan-11-3664-Tail	chr14	101666614	101666614	G	C	Uchl3	c.286G>C	p.Gly96Arg	missense_variant	MODERATE	117	0	0.011	153	76	0.473	5.90001
Aplan-11-3664-Thy_vs_Aplan-11-3664-Tail	chr14	118529982	118529982	G	C	Abcc4	c.2687-5C>G		splice_region_variant&intron_variant	LOW	25	0	0.039	29	14	0.553	4.59737
Aplan-11-3664-Thy_vs_Aplan-11-3664-Tail	chr14	121662503	121662503	C	G	Dock9	c.410+8G>C		splice_region_variant&intron_variant	LOW	49	0	0.026	73	33	0.448	6.07125
Aplan-11-3664-Thy_vs_Aplan-11-3664-Tail	chr14	122143514	122143514	C	G	Tm9sf2	c.1013C>G	p.Thr338Arg	missense_variant&splice_region_variant	MODERATE	56	0	0.021	118	49	0.424	5.87695
Aplan-11-3664-Thy_vs_Aplan-11-3664-Tail	chr15	5189635	5189635	C	G	Ttc33	c.53C>G	p.Thr18Arg	missense_variant	MODERATE	24	0	0.048	42	14	0.324	2.96479
Aplan-11-3664-Thy_vs_Aplan-11-3664-Tail	chr15	8042733	8042733	G	A	Wdr70	c.673C>T	p.Arg225*	stop_gained	HIGH	62	0	0.02	48	18	0.351	7.4359
Aplan-11-3664-Thy_vs_Aplan-11-3664-Tail	chr15	8099161	8099161	G	C	Wdr70	c.-18C>G		5_prime_UTR_variant	MODIFIER	50	0	0.026	62	25	0.438	5.84828
Aplan-11-3664-Thy_vs_Aplan-11-3664-Tail	chr15	8117334	8117334	G	C	Nup155	c.657G>C	p.Thr219Thr	synonymous_variant	LOW	101	0	0.012	145	77	0.529	5.78791
Aplan-11-3664-Thy_vs_Aplan-11-3664-Tail	chr15	19010899	19010899	G	C	Cdh10	c.1667G>C	p.Arg556Pro	missense_variant	MODERATE	102	1	0.024	162	76	0.466	6.11702
Aplan-11-3664-Thy_vs_Aplan-11-3664-Tail	chr15	39681684	39681684	C	G	Rims2	c.4639C>G	p.Pro1547Ala	missense_variant	MODERATE	54	0	0.021	107	45	0.401	6.23357
Aplan-11-3664-Thy_vs_Aplan-11-3664-Tail	chr15	52478153	52478153	G	A	Slc30a8-Med30	n.52478153G>A		intergenic_region	MODIFIER	127	0	0.009988	195	46	0.244	5.9656
Aplan-11-3664-Thy_vs_Aplan-11-3664-Tail	chr15	74746688	74746688	G	C	Slurp2	c.-13C>G		upstream_gene_variant	MODIFIER	77	0	0.015	101	39	0.395	5.991
Aplan-11-3664-Thy_vs_Aplan-11-3664-Tail	chr15	74751910	74751910	G	C	Lynx1	c.-4C>G		5_prime_UTR_variant	MODIFIER	44	0	0.025	66	24	0.365	5.72497
Aplan-11-3664-Thy_vs_Aplan-11-3664-Tail	chr15	75108758	75108758	G	C	Ly6c2	c.188-7C>G		splice_region_variant&intron_variant	LOW	65	0	0.018	132	59	0.421	6.06546
Aplan-11-3664-Thy_vs_Aplan-11-3664-Tail	chr15	76173840	76173840	G	C	Plec	c.12406C>G	p.Arg4136Gly	missense_variant	MODERATE	57	0	0.018	79	39	0.51	6.03148
Aplan-11-3664-Thy_vs_Aplan-11-3664-Tail	chr15	76297228	76297228	G	C	Oplah	c.3511C>G	p.Arg1171Gly	missense_variant	MODERATE	21	0	0.049	30	10	0.357	2.51299
Aplan-11-3664-Thy_vs_Aplan-11-3664-Tail	chr15	76298261	76298261	G	C	Oplah	c.2893C>G	p.Arg965Gly	missense_variant	MODERATE	35	0	0.029	50	23	0.458	6.29732
Aplan-11-3664-Thy_vs_Aplan-11-3664-Tail	chr15	76298488	76298488	G	C	Oplah	c.2770C>G	p.Arg924Gly	missense_variant	MODERATE	34	0	0.032	56	26	0.435	6.44584
Aplan-11-3664-Thy_vs_Aplan-11-3664-Tail	chr15	76300942	76300942	G	C	Oplah	c.2570C>G	p.Ala857Gly	missense_variant	MODERATE	30	0	0.036	55	18	0.361	3.78492
Aplan-11-3664-Thy_vs_Aplan-11-3664-Tail	chr15	76305282	76305282	G	C	Oplah	c.641C>G	p.Thr214Arg	missense_variant	MODERATE	36	0	0.029	62	34	0.539	6.18918
Aplan-11-3664-Thy_vs_Aplan-11-3664-Tail	chr15	76664262	76664262	C	G	Foxh1	c.*4045G>C		downstream_gene_variant	MODIFIER	42	0	0.024	42	20	0.497	7.01903
Aplan-11-3664-Thy_vs_Aplan-11-3664-Tail	chr15	76901121	76901121	G	C	Commd5	c.*42G>C		3_prime_UTR_variant	MODIFIER	48	0	0.022	56	33	0.616	6.18334
Aplan-11-3664-Thy_vs_Aplan-11-3664-Tail	chr15	77635525	77635525	C	G	Apol11b	c.354G>C	p.Lys118Asn	missense_variant	MODERATE	76	0	0.014	101	45	0.454	6.30105
Aplan-11-3664-Thy_vs_Aplan-11-3664-Tail	chr15	79003716	79003716	G	C	Triobp	c.5810G>C	p.Arg1937Pro	missense_variant	MODERATE	14	0	0.071	17	5	0.375	1.31694
Aplan-11-3664-Thy_vs_Aplan-11-3664-Tail	chr15	79029692	79029692	G	C	H1f0	c.*386G>C		3_prime_UTR_variant	MODIFIER	74	0	0.016	114	51	0.443	5.83434
Aplan-11-3664-Thy_vs_Aplan-11-3664-Tail	chr15	79362899	79362899	G	C	Maff	c.*5044G>C		downstream_gene_variant	MODIFIER	22	0	0.045	25	9	0.428	2.72948
Aplan-11-3664-Thy_vs_Aplan-11-3664-Tail	chr15	80211690	80211690	C	T	Mgat3	c.717C>T	p.Phe239Phe	synonymous_variant	LOW	38	1	0.056	65	29	0.429	5.5751
Aplan-11-3664-Thy_vs_Aplan-11-3664-Tail	chr15	80355560	80355560	C	T	Cacna1i	c.809C>T	p.Ser270Leu	missense_variant	MODERATE	47	0	0.024	58	16	0.281	4.39856
Aplan-11-3664-Thy_vs_Aplan-11-3664-Tail	chr15	80371594	80371594	C	G	Cacna1i	c.2677C>G	p.Arg893Gly	missense_variant	MODERATE	35	0	0.033	66	13	0.235	2.43751
Aplan-11-3664-Thy_vs_Aplan-11-3664-Tail	chr15	80672234	80672234	G	C	Fam83f	c.318G>C	p.Ser106Ser	synonymous_variant	LOW	10	0	0.081	9	5	0.556	1.96513
Aplan-11-3664-Thy_vs_Aplan-11-3664-Tail	chr15	81620024	81620024	G	C	Ep300	c.1788G>C	p.Pro596Pro	synonymous_variant	LOW	102	0	0.013	148	71	0.497	5.73857
Aplan-11-3664-Thy_vs_Aplan-11-3664-Tail	chr15	81683892	81683892	C	G	L3mbtl2	c.1406C>G	p.Thr469Arg	missense_variant	MODERATE	38	0	0.03	41	19	0.515	6.4992
Aplan-11-3664-Thy_vs_Aplan-11-3664-Tail	chr15	81773288	81773288	A	C	Zc3h7b	c.528A>C	p.Glu176Asp	missense_variant&splice_region_variant	MODERATE	90	0	0.014	140	62	0.446	6.17668
Aplan-11-3664-Thy_vs_Aplan-11-3664-Tail	chr15	81823600	81823600	G	C	Tef	c.825G>C	p.Thr275Thr	synonymous_variant	LOW	32	0	0.036	43	17	0.368	4.8215
Aplan-11-3664-Thy_vs_Aplan-11-3664-Tail	chr15	81851804	81851804	G	C	Tob2	c.-38C>G		5_prime_UTR_variant	MODIFIER	21	0	0.05	27	11	0.438	2.99392
Aplan-11-3664-Thy_vs_Aplan-11-3664-Tail	chr15	81912264	81912264	G	C	Aco2	c.1664G>C	p.Arg555Pro	missense_variant	MODERATE	28	0	0.044	53	21	0.415	4.51991
Aplan-11-3664-Thy_vs_Aplan-11-3664-Tail	chr15	81956334	81956334	G	C	Pmm1	c.282+28C>G		intron_variant	MODIFIER	49	0	0.024	76	38	0.5	6.05686
Aplan-11-3664-Thy_vs_Aplan-11-3664-Tail	chr15	82640434	82640434	C	G	Cyp2d13	n.500G>C		non_coding_transcript_exon_variant	MODIFIER	79	0	0.014	105	59	0.58	5.96418
Aplan-11-3664-Thy_vs_Aplan-11-3664-Tail	chr15	83634683	83634683	G	C	Scube1	c.1045C>G	p.Arg349Gly	missense_variant	MODERATE	34	0	0.033	51	20	0.415	5.03663
Aplan-11-3664-Thy_vs_Aplan-11-3664-Tail	chr15	86130646	86130646	G	C	Gramd4	c.1393G>C	p.Val465Leu	missense_variant	MODERATE	47	1	0.048	49	22	0.489	6.43701
Aplan-11-3664-Thy_vs_Aplan-11-3664-Tail	chr15	86145489	86145489	G	C	Cerk	c.1125C>G	p.Ala375Ala	splice_region_variant&synonymous_variant	LOW	55	0	0.023	109	32	0.273	5.94152
Aplan-11-3664-Thy_vs_Aplan-11-3664-Tail	chr15	89525180	89525180	G	C	Shank3	c.1516G>C	p.Gly506Arg	missense_variant	MODERATE	36	0	0.032	55	29	0.559	6.35859
Aplan-11-3664-Thy_vs_Aplan-11-3664-Tail	chr15	92314583	92314583	C	G	Cntn1	c.2625C>G	p.Pro875Pro	synonymous_variant	LOW	31	0	0.036	58	29	0.479	6.26649
Aplan-11-3664-Thy_vs_Aplan-11-3664-Tail	chr15	97384302	97384302	C	G	Pced1b	c.221C>G	p.Thr74Arg	missense_variant	MODERATE	51	0	0.025	44	23	0.51	6.35639
Aplan-11-3664-Thy_vs_Aplan-11-3664-Tail	chr15	98721031	98721031	G	C	Ccdc65	c.890G>C	p.Arg297Pro	missense_variant	MODERATE	24	0	0.042	48	20	0.421	4.21265
Aplan-11-3664-Thy_vs_Aplan-11-3664-Tail	chr15	98834977	98834977	C	G	Kmt2d	c.16496G>C	p.Arg5499Pro	missense_variant	MODERATE	69	0	0.016	91	43	0.486	6.23426
Aplan-11-3664-Thy_vs_Aplan-11-3664-Tail	chr15	99101477	99101477	G	C	Dnajc22	c.542G>C	p.Arg181Pro	missense_variant	MODERATE	43	0	0.026	73	46	0.606	5.83216
Aplan-11-3664-Thy_vs_Aplan-11-3664-Tail	chr15	99325716	99325716	G	C	Fmnl3	c.998C>G	p.Ser333Trp	missense_variant	MODERATE	60	0	0.018	110	45	0.423	5.9863
Aplan-11-3664-Thy_vs_Aplan-11-3664-Tail	chr15	99424089	99424089	C	A	Nckap5l	c.3228+29G>T		intron_variant	MODIFIER	18	0	0.056	27	15	0.552	4.22644
Aplan-11-3664-Thy_vs_Aplan-11-3664-Tail	chr15	100193899	100193899	G	C	Dip2b	c.3220G>C	p.Val1074Leu	missense_variant	MODERATE	57	0	0.02	76	52	0.649	5.99693
Aplan-11-3664-Thy_vs_Aplan-11-3664-Tail	chr15	100209602	100209602	C	G	Dip2b	c.4194C>G	p.Thr1398Thr	synonymous_variant	LOW	31	0	0.034	67	32	0.518	5.93886
Aplan-11-3664-Thy_vs_Aplan-11-3664-Tail	chr15	100469128	100469128	C	G	Letmd1	c.5C>G	p.Ala2Gly	missense_variant	MODERATE	13	0	0.1	16	6	0.467	1.68887
Aplan-11-3664-Thy_vs_Aplan-11-3664-Tail	chr15	100580015	100580015	C	G	Pou6f1	c.1246G>C	p.Gly416Arg	missense_variant	MODERATE	22	0	0.054	27	9	0.378	2.59801
Aplan-11-3664-Thy_vs_Aplan-11-3664-Tail	chr15	100715973	100715973	C	G	Galnt6	c.446G>C	p.Arg149Pro	missense_variant	MODERATE	62	0	0.02	73	41	0.565	5.83997
Aplan-11-3664-Thy_vs_Aplan-11-3664-Tail	chr15	101202022	101202022	G	A	Acvr1b	c.856G>A	p.Glu286Lys	missense_variant	MODERATE	66	2	0.038	92	39	0.429	6.10589
Aplan-11-3664-Thy_vs_Aplan-11-3664-Tail	chr15	101230585	101230585	G	C	Grasp	c.503G>C	p.Arg168Pro	missense_variant	MODERATE	45	0	0.024	93	38	0.446	5.97968
Aplan-11-3664-Thy_vs_Aplan-11-3664-Tail	chr15	101528451	101528451	G	C	Krt84	c.1147C>G	p.Arg383Gly	missense_variant	MODERATE	39	0	0.029	56	26	0.425	6.7524
Aplan-11-3664-Thy_vs_Aplan-11-3664-Tail	chr15	101545052	101545052	G	C	Krt82	c.898C>G	p.Arg300Gly	missense_variant	MODERATE	22	0	0.056	32	19	0.577	5.40022
Aplan-11-3664-Thy_vs_Aplan-11-3664-Tail	chr15	102130380	102130380	G	C	Spryd3	c.405C>G	p.Phe135Leu	missense_variant	MODERATE	35	0	0.031	47	21	0.463	6.0303
Aplan-11-3664-Thy_vs_Aplan-11-3664-Tail	chr15	102298753	102298753	C	G	Espl1	c.651C>G	p.Ala217Ala	synonymous_variant	LOW	53	0	0.021	64	30	0.458	5.88894
Aplan-11-3664-Thy_vs_Aplan-11-3664-Tail	chr15	102452255	102452255	G	C	Amhr2	c.947G>C	p.Trp316Ser	missense_variant	MODERATE	61	0	0.019	73	32	0.457	5.89754
Aplan-11-3664-Thy_vs_Aplan-11-3664-Tail	chr16	8716484	8716484	C	G	Usp7	c.187+31G>C		intron_variant	MODIFIER	69	0	0.018	121	63	0.495	5.98646
Aplan-11-3664-Thy_vs_Aplan-11-3664-Tail	chr16	10285478	10285478	G	C	Emp2	c.308C>G	p.Thr103Arg	missense_variant	MODERATE	36	0	0.029	41	20	0.5	6.36944
Aplan-11-3664-Thy_vs_Aplan-11-3664-Tail	chr16	10511994	10511994	G	C	Ciita	c.2372G>C	p.Arg791Pro	missense_variant	MODERATE	32	0	0.031	42	15	0.363	4.18534
Aplan-11-3664-Thy_vs_Aplan-11-3664-Tail	chr16	14125957	14125957	G	C	Marf1	c.4161C>G	p.Leu1387Leu	synonymous_variant	LOW	41	0	0.026	85	18	0.223	3.17663
Aplan-11-3664-Thy_vs_Aplan-11-3664-Tail	chr16	16879037	16879037	C	G	Top3b	c.151C>G	p.His51Asp	missense_variant	MODERATE	67	0	0.017	101	42	0.428	5.88359
Aplan-11-3664-Thy_vs_Aplan-11-3664-Tail	chr16	17301091	17301091	G	C	Pi4ka	c.3888C>G	p.Thr1296Thr	synonymous_variant	LOW	82	0	0.015	89	33	0.411	6.4338
Aplan-11-3664-Thy_vs_Aplan-11-3664-Tail	chr16	18213893	18213893	G	C	4933432I09Rik	n.-360C>G		upstream_gene_variant	MODIFIER	39	0	0.027	48	21	0.461	5.86495
Aplan-11-3664-Thy_vs_Aplan-11-3664-Tail	chr16	30259499	30259499	C	G	Cpn2	c.1383G>C	p.Glu461Asp	missense_variant	MODERATE	46	0	0.027	57	22	0.404	6.07309
Aplan-11-3664-Thy_vs_Aplan-11-3664-Tail	chr16	30259726	30259726	C	G	Cpn2	c.1156G>C	p.Asp386His	missense_variant	MODERATE	36	0	0.03	65	30	0.448	6.24283
Aplan-11-3664-Thy_vs_Aplan-11-3664-Tail	chr16	32143920	32143920	C	G	Nrros	c.1278G>C	p.Thr426Thr	synonymous_variant	LOW	43	0	0.026	51	35	0.689	6.41418
Aplan-11-3664-Thy_vs_Aplan-11-3664-Tail	chr16	32670184	32670184	G	C	Tnk2	c.841G>C	p.Asp281His	missense_variant	MODERATE	26	0	0.038	53	16	0.357	3.0802
Aplan-11-3664-Thy_vs_Aplan-11-3664-Tail	chr16	32760171	32760171	C	G	Muc4	c.7354C>G	p.Arg2452Gly	missense_variant	MODERATE	69	0	0.016	129	66	0.51	5.87806
Aplan-11-3664-Thy_vs_Aplan-11-3664-Tail	chr16	33434752	33434752	C	G	Zfp148	c.111C>G	p.Ala37Ala	synonymous_variant	LOW	98	0	0.012	130	68	0.51	5.69319
Aplan-11-3664-Thy_vs_Aplan-11-3664-Tail	chr16	33710698	33710698	G	C	Heg1	c.543G>C	p.Ser181Ser	splice_region_variant&synonymous_variant	LOW	31	0	0.038	37	22	0.588	5.93421
Aplan-11-3664-Thy_vs_Aplan-11-3664-Tail	chr16	57628742	57628742	G	C	Col8a1	c.404C>G	p.Pro135Arg	missense_variant	MODERATE	29	0	0.036	48	10	0.225	1.96528
Aplan-11-3664-Thy_vs_Aplan-11-3664-Tail	chr16	58916498	58916498	C	G	Olfr180	c.142G>C	p.Val48Leu	missense_variant	MODERATE	186	0	0.006202	228	116	0.514	5.72294
Aplan-11-3664-Thy_vs_Aplan-11-3664-Tail	chr16	64478591	64478591	G	C	Csnka2ip	c.77C>G	p.Ala26Gly	missense_variant	MODERATE	82	0	0.013	112	59	0.532	5.79743
Aplan-11-3664-Thy_vs_Aplan-11-3664-Tail	chr16	91270685	91270685	G	C	Olig1	c.*26G>C		3_prime_UTR_variant	MODIFIER	43	0	0.025	36	16	0.455	6.46999
Aplan-11-3664-Thy_vs_Aplan-11-3664-Tail	chr16	91580193	91580193	C	G	Tmem50b	c.373+9G>C		intron_variant	MODIFIER	68	0	0.019	125	59	0.479	5.88062
Aplan-11-3664-Thy_vs_Aplan-11-3664-Tail	chr16	91637891	91637891	C	G	Gart	c.723+39G>C		intron_variant	MODIFIER	19	0	0.056	23	7	0.4	1.96039
Aplan-11-3664-Thy_vs_Aplan-11-3664-Tail	chr16	97746038	97746038	C	G	Ripk4	c.1023G>C	p.Leu341Phe	missense_variant	MODERATE	19	0	0.057	33	17	0.496	3.97166
Aplan-11-3664-Thy_vs_Aplan-11-3664-Tail	chr17	5714991	5714991	C	T	Zdhhc14	c.726C>T	p.Leu242Leu	synonymous_variant	LOW	76	0	0.017	119	54	0.463	5.84971
Aplan-11-3664-Thy_vs_Aplan-11-3664-Tail	chr17	13062977	13062977	C	G	Tcp10b	c.233C>G	p.Ala78Gly	missense_variant	MODERATE	67	0	0.016	102	42	0.432	6.43887
Aplan-11-3664-Thy_vs_Aplan-11-3664-Tail	chr17	23815968	23815968	C	G	Srrm2	c.1585C>G	p.Arg529Gly	missense_variant	MODERATE	43	0	0.027	57	26	0.454	5.89829
Aplan-11-3664-Thy_vs_Aplan-11-3664-Tail	chr17	23837094	23837094	C	G	Prss41	c.784G>C	p.Gly262Arg	missense_variant	MODERATE	38	0	0.028	38	19	0.5	6.73323
Aplan-11-3664-Thy_vs_Aplan-11-3664-Tail	chr17	24567694	24567694	C	G	Pkd1	c.1701C>G	p.Gly567Gly	synonymous_variant	LOW	83	0	0.014	103	46	0.44	6.02108
Aplan-11-3664-Thy_vs_Aplan-11-3664-Tail	chr17	24593803	24593803	C	G	Pkd1	c.11512C>G	p.Arg3838Gly	missense_variant	MODERATE	22	0	0.041	35	16	0.437	3.88695
Aplan-11-3664-Thy_vs_Aplan-11-3664-Tail	chr17	24619523	24619523	G	C	Tsc2	c.1491C>G	p.Pro497Pro	synonymous_variant	LOW	24	0	0.049	32	15	0.536	4.41174
Aplan-11-3664-Thy_vs_Aplan-11-3664-Tail	chr17	24641680	24641680	C	G	Nthl1	c.*2949C>G		downstream_gene_variant	MODIFIER	63	0	0.018	116	66	0.561	6.16093
Aplan-11-3664-Thy_vs_Aplan-11-3664-Tail	chr17	24680144	24680144	C	G	Zfp598	c.1916C>G	p.Ala639Gly	missense_variant	MODERATE	29	0	0.04	49	22	0.485	5.39238
Aplan-11-3664-Thy_vs_Aplan-11-3664-Tail	chr17	24680667	24680667	C	G	Zfp598	c.2091C>G	p.Pro697Pro	synonymous_variant	LOW	8	0	0.097	26	17	0.581	2.57221
Aplan-11-3664-Thy_vs_Aplan-11-3664-Tail	chr17	24721672	24721672	C	G	Rps2	c.759C>G	p.Pro253Pro	synonymous_variant	LOW	95	0	0.012	179	96	0.493	5.90917
Aplan-11-3664-Thy_vs_Aplan-11-3664-Tail	chr17	25247087	25247087	G	C	Mir3547	n.-1449C>G		upstream_gene_variant	MODIFIER	71	1	0.033	103	53	0.512	6.04906
Aplan-11-3664-Thy_vs_Aplan-11-3664-Tail	chr17	25744092	25744092	C	G	Mslnl	c.913C>G	p.Arg305Gly	missense_variant	MODERATE	27	0	0.04	41	14	0.353	3.38884
Aplan-11-3664-Thy_vs_Aplan-11-3664-Tail	chr17	27110615	27110615	C	G	Itpr3	c.4597+15C>G		intron_variant	MODIFIER	18	0	0.059	33	15	0.448	3.44554
Aplan-11-3664-Thy_vs_Aplan-11-3664-Tail	chr17	27110945	27110945	C	G	Itpr3	c.4712C>G	p.Thr1571Arg	missense_variant	MODERATE	25	0	0.043	37	17	0.485	4.60992
Aplan-11-3664-Thy_vs_Aplan-11-3664-Tail	chr17	27881590	27881590	C	G	Uhrf1bp1	c.1002C>G	p.Cys334Trp	missense_variant	MODERATE	30	1	0.08	42	18	0.454	3.96262
Aplan-11-3664-Thy_vs_Aplan-11-3664-Tail	chr17	28067950	28067950	G	C	Tcp11	c.1311C>G	p.Pro437Pro	synonymous_variant	LOW	44	0	0.025	47	21	0.425	6.35597
Aplan-11-3664-Thy_vs_Aplan-11-3664-Tail	chr17	28153668	28153668	C	G	Scube3	c.318C>G	p.Asp106Glu	missense_variant	MODERATE	44	0	0.026	86	47	0.528	6.10823
Aplan-11-3664-Thy_vs_Aplan-11-3664-Tail	chr17	28320822	28320823	CG	C	Fance	c.1320delG	p.Phe441fs	frameshift_variant	HIGH	28	0	0.045	37	14	0.355	3.90833
Aplan-11-3664-Thy_vs_Aplan-11-3664-Tail	chr17	28351936	28351936	G	C	Tulp1	c.1565C>G	p.Pro522Arg	missense_variant	MODERATE	18	0	0.063	37	16	0.479	3.32209
Aplan-11-3664-Thy_vs_Aplan-11-3664-Tail	chr17	28532013	28532013	G	C	Armc12	c.202G>C	p.Gly68Arg	missense_variant	MODERATE	43	0	0.027	59	21	0.404	5.69069
Aplan-11-3664-Thy_vs_Aplan-11-3664-Tail	chr17	28558369	28558369	G	C	Clps	c.282C>G	p.Ile94Met	missense_variant	MODERATE	25	0	0.05	35	20	0.567	5.59632
Aplan-11-3664-Thy_vs_Aplan-11-3664-Tail	chr17	29159040	29159040	G	C	Cpne5	c.1764C>G	p.Pro588Pro	synonymous_variant	LOW	26	0	0.043	54	33	0.568	5.8514
Aplan-11-3664-Thy_vs_Aplan-11-3664-Tail	chr17	29160341	29160341	G	C	Cpne5	c.1467C>G	p.Gly489Gly	synonymous_variant	LOW	75	1	0.033	84	37	0.444	5.8183
Aplan-11-3664-Thy_vs_Aplan-11-3664-Tail	chr17	29704417	29704417	C	G	Ccdc167	c.243G>C	p.Ser81Ser	synonymous_variant	LOW	59	0	0.02	84	29	0.352	6.01341
Aplan-11-3664-Thy_vs_Aplan-11-3664-Tail	chr17	30635731	30635731	G	C	Dnah8	c.366G>C	p.Ser122Ser	synonymous_variant	LOW	39	0	0.029	47	21	0.406	6.5595
Aplan-11-3664-Thy_vs_Aplan-11-3664-Tail	chr17	30690188	30690188	C	G	Dnah8	c.2987C>G	p.Thr996Ser	missense_variant	MODERATE	51	0	0.021	88	45	0.521	5.86506
Aplan-11-3664-Thy_vs_Aplan-11-3664-Tail	chr17	30813184	30813184	C	G	Dnah8	c.12477C>G	p.Ser4159Ser	synonymous_variant	LOW	36	0	0.034	69	35	0.502	6.28069
Aplan-11-3664-Thy_vs_Aplan-11-3664-Tail	chr17	31261756	31261756	G	C	Rsph1	c.572C>G	p.Thr191Arg	missense_variant&splice_region_variant	MODERATE	99	1	0.024	182	75	0.418	5.92291
Aplan-11-3664-Thy_vs_Aplan-11-3664-Tail	chr17	32415942	32415942	G	C	Pglyrp2	c.1445C>G	p.Ala482Gly	missense_variant	MODERATE	17	0	0.06	20	8	0.421	2.40978
Aplan-11-3664-Thy_vs_Aplan-11-3664-Tail	chr17	32929500	32929500	G	C	Cyp4f13	c.952C>G	p.Arg318Gly	missense_variant	MODERATE	194	0	0.006658	282	125	0.453	5.81495
Aplan-11-3664-Thy_vs_Aplan-11-3664-Tail	chr17	33949263	33949263	C	G	B3galt4	c.*884G>C		downstream_gene_variant	MODIFIER	72	2	0.032	69	31	0.452	6.08835
Aplan-11-3664-Thy_vs_Aplan-11-3664-Tail	chr17	34061159	34061159	C	G	Col11a2	c.3736-60C>G		intron_variant	MODIFIER	27	0	0.039	50	17	0.34	3.51801
Aplan-11-3664-Thy_vs_Aplan-11-3664-Tail	chr17	34672755	34672755	G	C	Tnxb	c.2071G>C	p.Val691Leu	missense_variant	MODERATE	27	0	0.042	49	21	0.4	4.64525
Aplan-11-3664-Thy_vs_Aplan-11-3664-Tail	chr17	34709442	34709442	C	G	Tnxb	c.6092-1992C>G		intron_variant	MODIFIER	80	0	0.013	129	67	0.519	5.81805
Aplan-11-3664-Thy_vs_Aplan-11-3664-Tail	chr17	34881595	34881595	C	G	C2	c.248G>C	p.Arg83Pro	missense_variant	MODERATE	31	0	0.038	37	19	0.504	6.11965
Aplan-11-3664-Thy_vs_Aplan-11-3664-Tail	chr17	35881223	35881223	C	G	Dhx16	c.208-55C>G		intron_variant	MODIFIER	27	0	0.043	21	11	0.5	4.80659
Aplan-11-3664-Thy_vs_Aplan-11-3664-Tail	chr17	46437366	46437366	C	G	Slc22a7	c.454G>C	p.Gly152Arg	missense_variant	MODERATE	92	0	0.014	111	69	0.623	5.86024
Aplan-11-3664-Thy_vs_Aplan-11-3664-Tail	chr17	46631873	46631873	C	G	Klc4	c.1764G>C	p.Ala588Ala	synonymous_variant	LOW	24	0	0.041	52	27	0.519	5.45166
Aplan-11-3664-Thy_vs_Aplan-11-3664-Tail	chr17	46663225	46663225	C	G	Rrp36	c.*4725G>C		downstream_gene_variant	MODIFIER	8	0	0.1	28	11	0.429	1.12081
Aplan-11-3664-Thy_vs_Aplan-11-3664-Tail	chr17	46663993	46663993	C	G	Cul7	c.4772C>G	p.Pro1591Arg	missense_variant	MODERATE	18	0	0.053	35	13	0.366	2.67401
Aplan-11-3664-Thy_vs_Aplan-11-3664-Tail	chr17	47871342	47871342	G	C	Foxp4	c.1561C>G	p.Arg521Gly	missense_variant	MODERATE	78	0	0.016	64	29	0.461	5.82328
Aplan-11-3664-Thy_vs_Aplan-11-3664-Tail	chr17	47888164	47888164	C	G	Foxp4	c.279G>C	p.Pro93Pro	synonymous_variant	LOW	19	0	0.063	35	11	0.3	2.30387
Aplan-11-3664-Thy_vs_Aplan-11-3664-Tail	chr17	55991177	55991177	C	G	Fsd1	c.501C>G	p.Ala167Ala	synonymous_variant	LOW	24	0	0.042	25	12	0.458	4.06716
Aplan-11-3664-Thy_vs_Aplan-11-3664-Tail	chr17	56047243	56047243	C	G	Chaf1a	c.512C>G	p.Pro171Arg	missense_variant	MODERATE	39	0	0.028	57	25	0.436	6.31836
Aplan-11-3664-Thy_vs_Aplan-11-3664-Tail	chr17	56315459	56315459	C	G	Uhrf1	c.1273C>G	p.Pro425Ala	missense_variant	MODERATE	65	0	0.017	81	41	0.464	6.15704
Aplan-11-3664-Thy_vs_Aplan-11-3664-Tail	chr17	56877408	56877408	G	C	1700061G19Rik	c.182G>C	p.Arg61Pro	missense_variant	MODERATE	31	0	0.039	50	23	0.452	5.82647
Aplan-11-3664-Thy_vs_Aplan-11-3664-Tail	chr17	56883798	56883798	C	G	1700061G19Rik	c.1365C>G	p.Tyr455*	stop_gained	HIGH	17	0	0.065	33	12	0.381	2.38687
Aplan-11-3664-Thy_vs_Aplan-11-3664-Tail	chr17	57080920	57080920	C	G	Tubb4a	c.1105G>C	p.Gly369Arg	missense_variant	MODERATE	100	0	0.012	136	58	0.461	5.88762
Aplan-11-3664-Thy_vs_Aplan-11-3664-Tail	chr17	64137745	64137745	G	C	Fer	c.2242G>C	p.Gly748Arg	missense_variant	MODERATE	26	0	0.039	43	10	0.222	1.99147
Aplan-11-3664-Thy_vs_Aplan-11-3664-Tail	chr17	67812466	67812466	G	C	Lama1	c.7937G>C	p.Arg2646Pro	missense_variant	MODERATE	53	0	0.023	59	29	0.53	6.04146
Aplan-11-3664-Thy_vs_Aplan-11-3664-Tail	chr17	71391413	71391413	G	C	Smchd1	c.3367C>G	p.Arg1123Gly	missense_variant	MODERATE	85	0	0.015	130	57	0.44	6.27756
Aplan-11-3664-Thy_vs_Aplan-11-3664-Tail	chr17	71690568	71690568	G	C	Fam179a	c.473G>C	p.Arg158Pro	missense_variant	MODERATE	19	0	0.059	27	8	0.391	1.85351
Aplan-11-3664-Thy_vs_Aplan-11-3664-Tail	chr17	71691584	71691584	C	G	Fam179a	c.781C>G	p.Pro261Ala	missense_variant	MODERATE	19	0	0.061	19	10	0.47	3.40802
Aplan-11-3664-Thy_vs_Aplan-11-3664-Tail	chr17	74579581	74579581	C	G	Birc6	c.1903C>G	p.Leu635Val	missense_variant	MODERATE	78	0	0.014	143	71	0.501	6.04942
Aplan-11-3664-Thy_vs_Aplan-11-3664-Tail	chr17	78625220	78625220	C	G	Vit	c.1755C>G	p.Ala585Ala	synonymous_variant	LOW	43	0	0.027	47	22	0.447	5.94491
Aplan-11-3664-Thy_vs_Aplan-11-3664-Tail	chr17	79659450	79659450	C	G	Rmdn2	c.768C>G	p.Pro256Pro	synonymous_variant	LOW	60	1	0.043	90	40	0.471	6.2311
Aplan-11-3664-Thy_vs_Aplan-11-3664-Tail	chr17	80145026	80145026	G	C	Galm	c.392G>C	p.Arg131Pro	missense_variant	MODERATE	49	0	0.026	70	33	0.482	6.20493
Aplan-11-3664-Thy_vs_Aplan-11-3664-Tail	chr17	80543722	80543722	C	G	Cdkl4	c.550G>C	p.Val184Leu	missense_variant	MODERATE	35	0	0.033	46	23	0.526	6.20134
Aplan-11-3664-Thy_vs_Aplan-11-3664-Tail	chr17	82410757	82410757	C	G	Slc8a1-Gm19689	n.82410757C>G		intergenic_region	MODIFIER	43	0	0.028	79	32	0.385	6.03394
Aplan-11-3664-Thy_vs_Aplan-11-3664-Tail	chr17	83421620	83421620	C	T	Eml4	c.223C>T	p.Arg75*	stop_gained	HIGH	78	0	0.014	147	67	0.45	5.84475
Aplan-11-3664-Thy_vs_Aplan-11-3664-Tail	chr17	84647339	84647339	C	G	Dync2li1	c.731+18C>G		intron_variant	MODIFIER	72	0	0.016	81	45	0.553	6.00746
Aplan-11-3664-Thy_vs_Aplan-11-3664-Tail	chr17	84692745	84692745	C	G	Abcg8	c.732C>G	p.Leu244Leu	synonymous_variant	LOW	55	0	0.02	71	34	0.458	5.84386
Aplan-11-3664-Thy_vs_Aplan-11-3664-Tail	chr18	10499922	10499922	C	G	Greb1l	c.988C>G	p.Arg330Gly	missense_variant	MODERATE	60	0	0.02	81	31	0.444	5.92679
Aplan-11-3664-Thy_vs_Aplan-11-3664-Tail	chr18	12189290	12189290	C	G	3110002H16Rik	c.1799C>G	p.Ala600Gly	missense_variant	MODERATE	67	1	0.018	104	61	0.568	6.19913
Aplan-11-3664-Thy_vs_Aplan-11-3664-Tail	chr18	16622234	16622234	C	G	Cdh2	c.2243G>C	p.Arg748Pro	missense_variant	MODERATE	84	1	0.017	111	58	0.53	5.81296
Aplan-11-3664-Thy_vs_Aplan-11-3664-Tail	chr18	23545703	23545703	C	G	Dtna	c.85C>G	p.Arg29Gly	missense_variant	MODERATE	103	0	0.011	162	44	0.281	6.04182
Aplan-11-3664-Thy_vs_Aplan-11-3664-Tail	chr18	35572786	35572786	C	G	Matr3	c.763C>G	p.Arg255Gly	missense_variant	MODERATE	69	0	0.015	75	32	0.444	6.32354
Aplan-11-3664-Thy_vs_Aplan-11-3664-Tail	chr18	35625004	35625004	C	G	Slc23a1	c.482G>C	p.Arg161Pro	missense_variant	MODERATE	65	0	0.018	103	48	0.478	5.93056
Aplan-11-3664-Thy_vs_Aplan-11-3664-Tail	chr18	35858764	35858764	C	G	Cxxc5	c.217C>G	p.Arg73Gly	missense_variant	MODERATE	33	0	0.032	46	22	0.433	5.97237
Aplan-11-3664-Thy_vs_Aplan-11-3664-Tail	chr18	37480040	37480040	G	C	Pcdhb16	c.2052G>C	p.Glu684Asp	missense_variant	MODERATE	193	1	0.013	357	172	0.476	5.68414
Aplan-11-3664-Thy_vs_Aplan-11-3664-Tail	chr18	37733030	37733030	G	C	Pcdhgb5	c.1877G>C	p.Arg626Pro	missense_variant	MODERATE	63	0	0.016	85	47	0.56	6.06818
Aplan-11-3664-Thy_vs_Aplan-11-3664-Tail	chr18	37808248	37808248	C	G	Pcdhgc3	c.1701C>G	p.Val567Val	synonymous_variant	LOW	105	0	0.012	102	47	0.447	6.09825
Aplan-11-3664-Thy_vs_Aplan-11-3664-Tail	chr18	37956974	37956974	G	C	Rell2	c.230G>C	p.Arg77Pro	missense_variant	MODERATE	91	0	0.013	114	55	0.513	5.92577
Aplan-11-3664-Thy_vs_Aplan-11-3664-Tail	chr18	39773667	39773667	C	G	Pabpc2	c.-17C>G		5_prime_UTR_variant	MODIFIER	23	0	0.047	23	9	0.348	2.82872
Aplan-11-3664-Thy_vs_Aplan-11-3664-Tail	chr18	43999810	43999810	C	G	Spink5	c.1492C>G	p.Arg498Gly	missense_variant	MODERATE	49	0	0.024	52	26	0.502	6.187
Aplan-11-3664-Thy_vs_Aplan-11-3664-Tail	chr18	44108070	44108070	G	C	Spink12	c.284G>C	p.Gly95Ala	missense_variant	MODERATE	71	0	0.016	98	46	0.456	6.33007
Aplan-11-3664-Thy_vs_Aplan-11-3664-Tail	chr18	54899546	54899546	C	G	Zfp608	c.1321G>C	p.Ala441Pro	missense_variant	MODERATE	32	0	0.034	32	13	0.424	4.27666
Aplan-11-3664-Thy_vs_Aplan-11-3664-Tail	chr18	60556306	60556306	C	G	Dctn4	c.1248C>G	p.Thr416Thr	synonymous_variant	LOW	28	0	0.042	40	18	0.419	4.96522
Aplan-11-3664-Thy_vs_Aplan-11-3664-Tail	chr18	60952165	60952165	G	C	Camk2a	c.304G>C	p.Val102Leu	missense_variant	MODERATE	76	0	0.015	102	40	0.398	5.97192
Aplan-11-3664-Thy_vs_Aplan-11-3664-Tail	chr18	60968948	60968948	G	A	Camk2a	c.985-1046G>A		intron_variant	MODIFIER	116	0	0.011	109	49	0.456	5.79078
Aplan-11-3664-Thy_vs_Aplan-11-3664-Tail	chr18	61009476	61009476	C	G	Slc6a7	c.163G>C	p.Val55Leu	missense_variant	MODERATE	23	0	0.048	20	7	0.333	2.61877
Aplan-11-3664-Thy_vs_Aplan-11-3664-Tail	chr18	61064916	61064916	C	G	Pdgfrb	c.748C>G	p.Arg250Gly	missense_variant	MODERATE	56	0	0.02	79	36	0.392	5.99563
Aplan-11-3664-Thy_vs_Aplan-11-3664-Tail	chr18	64288674	64288674	A	G	St8sia3os-Onecut2	n.64288674A>G		intergenic_region	MODIFIER	36	0	0.032	88	35	0.441	5.97865
Aplan-11-3664-Thy_vs_Aplan-11-3664-Tail	chr18	65800618	65800618	C	G	Sec11c	c.-7C>G		5_prime_UTR_variant	MODIFIER	22	0	0.053	26	8	0.291	2.30211
Aplan-11-3664-Thy_vs_Aplan-11-3664-Tail	chr18	67878629	67878629	G	C	Cep192	c.7189G>C	p.Ala2397Pro	missense_variant	MODERATE	36	0	0.029	60	32	0.542	6.58789
Aplan-11-3664-Thy_vs_Aplan-11-3664-Tail	chr18	69657887	69657887	G	A	Tcf4	c.1284G>A	p.Ala428Ala	synonymous_variant	LOW	51	0	0.024	75	27	0.378	6.72576
Aplan-11-3664-Thy_vs_Aplan-11-3664-Tail	chr18	71299487	71299487	C	T	Dcc	c.3955G>A	p.Glu1319Lys	missense_variant	MODERATE	27	0	0.043	19	5	0.312	2.07145
Aplan-11-3664-Thy_vs_Aplan-11-3664-Tail	chr18	77854835	77854835	G	C	Pstpip2	c.285G>C	p.Ala95Ala	synonymous_variant	LOW	22	0	0.052	31	16	0.464	4.51394
Aplan-11-3664-Thy_vs_Aplan-11-3664-Tail	chr18	78033114	78033114	C	G	Epg5	c.*7C>G		3_prime_UTR_variant	MODIFIER	35	0	0.031	52	16	0.34	3.9396
Aplan-11-3664-Thy_vs_Aplan-11-3664-Tail	chr18	78205852	78205852	C	G	Slc14a2	c.398G>C	p.Arg133Pro	missense_variant	MODERATE	25	0	0.046	39	20	0.467	5.39413
Aplan-11-3664-Thy_vs_Aplan-11-3664-Tail	chr18	84981275	84981275	G	C	Fbxo15	c.1336G>C	p.Ala446Pro	missense_variant	MODERATE	72	0	0.016	95	55	0.548	6.05052
Aplan-11-3664-Thy_vs_Aplan-11-3664-Tail	chr19	3380079	3380079	C	G	Cpt1a	c.1938C>G	p.Leu646Leu	synonymous_variant	LOW	32	0	0.039	58	27	0.479	5.83914
Aplan-11-3664-Thy_vs_Aplan-11-3664-Tail	chr19	3921166	3921166	C	G	Aldh3b1	c.480+17G>C		intron_variant	MODIFIER	52	0	0.021	80	34	0.412	5.93391
Aplan-11-3664-Thy_vs_Aplan-11-3664-Tail	chr19	4127572	4127572	C	T	Tmem134	c.262C>T	p.Arg88Cys	missense_variant	MODERATE	40	0	0.029	46	14	0.343	4.2368
Aplan-11-3664-Thy_vs_Aplan-11-3664-Tail	chr19	5380258	5380258	C	G	Sart1	c.2364G>C	p.Pro788Pro	synonymous_variant	LOW	54	0	0.021	69	39	0.563	5.79811
Aplan-11-3664-Thy_vs_Aplan-11-3664-Tail	chr19	5485553	5485553	G	C	Mus81	c.678C>G	p.His226Gln	missense_variant	MODERATE	80	0	0.015	99	58	0.567	5.66365
Aplan-11-3664-Thy_vs_Aplan-11-3664-Tail	chr19	5647325	5647325	C	G	Rela	c.1559C>G	p.Ser520Trp	missense_variant	MODERATE	17	0	0.063	29	15	0.462	3.70406
Aplan-11-3664-Thy_vs_Aplan-11-3664-Tail	chr19	5666456	5666456	C	G	Sipa1	c.-5476G>C		upstream_gene_variant	MODIFIER	27	0	0.041	32	16	0.48	4.97192
Aplan-11-3664-Thy_vs_Aplan-11-3664-Tail	chr19	5666680	5666680	C	G	Pcnx3	c.5013G>C	p.Ala1671Ala	synonymous_variant	LOW	24	0	0.043	34	9	0.345	2.13097
Aplan-11-3664-Thy_vs_Aplan-11-3664-Tail	chr19	5683240	5683240	C	G	Mir6987	n.-4164G>C		upstream_gene_variant	MODIFIER	61	0	0.019	69	23	0.356	6.86735
Aplan-11-3664-Thy_vs_Aplan-11-3664-Tail	chr19	5683266	5683266	C	G	Mir6987	n.-4190G>C		upstream_gene_variant	MODIFIER	66	0	0.019	80	29	0.376	5.80057
Aplan-11-3664-Thy_vs_Aplan-11-3664-Tail	chr19	5684511	5684511	C	G	Map3k11	c.-5736C>G		upstream_gene_variant	MODIFIER	31	0	0.037	41	15	0.394	4.18998
Aplan-11-3664-Thy_vs_Aplan-11-3664-Tail	chr19	5685078	5685078	C	G	Map3k11	c.-5169C>G		upstream_gene_variant	MODIFIER	24	0	0.05	32	10	0.328	2.51685
Aplan-11-3664-Thy_vs_Aplan-11-3664-Tail	chr19	5685672	5685672	C	T	Pcnx3	c.1125G>A	p.Thr375Thr	synonymous_variant	LOW	40	0	0.029	33	19	0.536	5.96239
Aplan-11-3664-Thy_vs_Aplan-11-3664-Tail	chr19	5685718	5685718	C	G	Pcnx3	c.1079G>C	p.Arg360Pro	missense_variant	MODERATE	35	0	0.034	43	27	0.609	6.14039
Aplan-11-3664-Thy_vs_Aplan-11-3664-Tail	chr19	5745576	5745576	C	G	Ltbp3	c.459C>G	p.Pro153Pro	synonymous_variant	LOW	26	0	0.044	18	11	0.648	5.382
Aplan-11-3664-Thy_vs_Aplan-11-3664-Tail	chr19	5745934	5745934	C	G	Ltbp3	c.669C>G	p.Pro223Pro	synonymous_variant	LOW	14	0	0.077	19	6	0.339	1.5653
Aplan-11-3664-Thy_vs_Aplan-11-3664-Tail	chr19	5747414	5747414	C	G	Ltbp3	c.1179C>G	p.Ala393Ala	splice_region_variant&synonymous_variant	LOW	28	0	0.042	29	7	0.296	1.98372
Aplan-11-3664-Thy_vs_Aplan-11-3664-Tail	chr19	5748649	5748649	C	G	Ltbp3	c.1540-17C>G		intron_variant	MODIFIER	84	0	0.013	127	56	0.427	5.97679
Aplan-11-3664-Thy_vs_Aplan-11-3664-Tail	chr19	5756657	5756657	C	T	Ltbp3	c.3042C>T	p.Tyr1014Tyr	synonymous_variant	LOW	35	0	0.033	33	13	0.37	4.73822
Aplan-11-3664-Thy_vs_Aplan-11-3664-Tail	chr19	5757622	5757622	C	G	Ltbp3	c.3473C>G	p.Pro1158Arg	missense_variant	MODERATE	43	0	0.026	57	18	0.312	4.96167
Aplan-11-3664-Thy_vs_Aplan-11-3664-Tail	chr19	5994770	5994770	C	G	Capn1	c.1471G>C	p.Gly491Arg	missense_variant	MODERATE	28	0	0.036	35	20	0.546	6.07685
Aplan-11-3664-Thy_vs_Aplan-11-3664-Tail	chr19	6071584	6071584	G	C	Vps51	c.483C>G	p.His161Gln	missense_variant	MODERATE	38	0	0.027	53	32	0.565	6.43634
Aplan-11-3664-Thy_vs_Aplan-11-3664-Tail	chr19	6090240	6090240	C	G	Cdca5	c.430C>G	p.Arg144Gly	missense_variant	MODERATE	55	0	0.018	79	32	0.423	6.69853
Aplan-11-3664-Thy_vs_Aplan-11-3664-Tail	chr19	6232329	6232329	G	C	Ppp2r5b	c.663C>G	p.Tyr221*	stop_gained	HIGH	27	0	0.04	25	13	0.5	5.08675
Aplan-11-3664-Thy_vs_Aplan-11-3664-Tail	chr19	6250661	6250661	G	C	Atg2a	c.2267G>C	p.Arg756Pro	missense_variant	MODERATE	46	0	0.025	27	15	0.552	6.18949
Aplan-11-3664-Thy_vs_Aplan-11-3664-Tail	chr19	6251728	6251728	C	G	Atg2a	c.2643C>G	p.Asp881Glu	missense_variant	MODERATE	50	0	0.022	71	34	0.447	5.89561
Aplan-11-3664-Thy_vs_Aplan-11-3664-Tail	chr19	6375728	6375728	C	G	Sf1	c.1653C>G	p.Ala551Ala	synonymous_variant	LOW	18	0	0.081	16	7	0.5	2.67233
Aplan-11-3664-Thy_vs_Aplan-11-3664-Tail	chr19	6938724	6938724	C	G	Kcnk4	c.-5833G>C		upstream_gene_variant	MODIFIER	19	0	0.047	23	11	0.5	3.47688
Aplan-11-3664-Thy_vs_Aplan-11-3664-Tail	chr19	7096162	7096162	C	G	Flrt1	c.1019G>C	p.Arg340Thr	missense_variant	MODERATE	29	0	0.037	24	10	0.462	3.99748
Aplan-11-3664-Thy_vs_Aplan-11-3664-Tail	chr19	8955443	8955443	C	G	Tut1	c.139C>G	p.Arg47Gly	missense_variant	MODERATE	37	0	0.033	42	25	0.568	6.29644
Aplan-11-3664-Thy_vs_Aplan-11-3664-Tail	chr19	9037163	9037163	C	G	Ahnak	n.9037163C>G		intragenic_variant	MODIFIER	90	0	0.013	139	63	0.457	5.76481
Aplan-11-3664-Thy_vs_Aplan-11-3664-Tail	chr19	10857657	10857657	G	C	Slc15a3	c.1610G>C	p.Arg537Pro	missense_variant	MODERATE	30	0	0.035	39	13	0.354	3.52212
Aplan-11-3664-Thy_vs_Aplan-11-3664-Tail	chr19	10857695	10857695	G	C	Slc15a3	c.1648G>C	p.Ala550Pro	missense_variant	MODERATE	30	0	0.043	37	13	0.375	3.56661
Aplan-11-3664-Thy_vs_Aplan-11-3664-Tail	chr19	17564892	17564892	G	C	Pcsk5	c.2387-53C>G		intron_variant	MODIFIER	27	0	0.039	39	17	0.387	4.59168
Aplan-11-3664-Thy_vs_Aplan-11-3664-Tail	chr19	21397649	21397649	C	G	Gda	c.1136-12G>C		intron_variant	MODIFIER	47	0	0.024	65	36	0.545	6.44533
Aplan-11-3664-Thy_vs_Aplan-11-3664-Tail	chr19	25183656	25183657	AT	A	Dock8	c.5493+34delT		intron_variant	MODIFIER	10	0	0.074	16	5	0.342	0.916091
Aplan-11-3664-Thy_vs_Aplan-11-3664-Tail	chr19	40551229	40551229	G	C	Aldh18a1	c.2307C>G	p.His769Gln	missense_variant	MODERATE	18	0	0.054	38	14	0.355	2.64382
Aplan-11-3664-Thy_vs_Aplan-11-3664-Tail	chr19	41096015	41096015	C	G	Tll2	c.2023G>C	p.Val675Leu	missense_variant	MODERATE	19	0	0.054	32	21	0.656	5.5396
Aplan-11-3664-Thy_vs_Aplan-11-3664-Tail	chr19	46076198	46076198	C	G	Pprc1	c.*3546C>G		downstream_gene_variant	MODIFIER	22	0	0.047	24	11	0.504	3.61982
Aplan-11-3664-Thy_vs_Aplan-11-3664-Tail	chr19	46255595	46255595	C	G	Gbf1	c.585-58C>G		intron_variant	MODIFIER	83	0	0.015	117	63	0.532	5.8848
Aplan-11-3664-Thy_vs_Aplan-11-3664-Tail	chr19	46543511	46543511	C	G	Arl3	c.286G>C	p.Asp96His	missense_variant	MODERATE	76	1	0.035	96	52	0.556	5.96818
Aplan-11-3664-Thy_vs_Aplan-11-3664-Tail	chr19	47657140	47657140	G	C	Col17a1	c.2481C>G	p.Pro827Pro	synonymous_variant	LOW	26	0	0.048	31	20	0.625	6.16289
Aplan-11-3664-Thy_vs_Aplan-11-3664-Tail	chr19	53445308	53445308	C	G	Mirt1	n.2898G>C		non_coding_transcript_exon_variant	MODIFIER	52	0	0.021	61	21	0.358	6.24323
Aplan-11-3664-Thy_vs_Aplan-11-3664-Tail	chr19	53453676	53453676	G	C	Mirt1	n.297-1912C>G		intron_variant	MODIFIER	27	0	0.039	29	18	0.656	5.87379
Aplan-11-3664-Thy_vs_Aplan-11-3664-Tail	chr19	53813558	53813558	G	C	Rbm20	c.496G>C	p.Ala166Pro	missense_variant	MODERATE	46	0	0.023	48	26	0.475	6.39219
Aplan-11-3664-Thy_vs_Aplan-11-3664-Tail	chrX	7934236	7934236	C	G	Hdac6	c.2270G>C	p.Gly757Ala	missense_variant	MODERATE	15	0	0.067	20	9	0.412	2.36933
Aplan-11-3664-Thy_vs_Aplan-11-3664-Tail	chrX	8074478	8074478	C	G	Suv39h1	c.-341G>C		upstream_gene_variant	MODIFIER	24	0	0.048	57	22	0.4	3.71892
Aplan-11-3664-Thy_vs_Aplan-11-3664-Tail	chrX	13158762	13158762	C	G	Usp9x	c.6253C>G	p.Arg2085Gly	missense_variant	MODERATE	77	0	0.015	134	63	0.468	5.7508
Aplan-11-3664-Thy_vs_Aplan-11-3664-Tail	chrX	13288591	13288591	C	G	Ddx3x	c.784C>G	p.Arg262Gly	missense_variant	MODERATE	130	0	0.009536	148	75	0.466	5.80573
Aplan-11-3664-Thy_vs_Aplan-11-3664-Tail	chrX	18145974	18145974	C	G	Dusp21	c.26C>G	p.Pro9Arg	missense_variant	MODERATE	111	0	0.011	149	66	0.447	5.80124
Aplan-11-3664-Thy_vs_Aplan-11-3664-Tail	chrX	20862846	20862846	C	G	Syn1	c.1638G>C	p.Ala546Ala	synonymous_variant	LOW	8	0	0.101	22	5	0.249	0.542471
Aplan-11-3664-Thy_vs_Aplan-11-3664-Tail	chrX	36883131	36883131	C	G	Ube2a	c.450C>G	p.Arg150Arg	synonymous_variant	LOW	35	0	0.03	45	19	0.389	5.64144
Aplan-11-3664-Thy_vs_Aplan-11-3664-Tail	chrX	38402181	38402181	C	G	Lamp2	c.1209G>C	p.Met403Ile	missense_variant	MODERATE	31	0	0.034	48	19	0.425	4.71467
Aplan-11-3664-Thy_vs_Aplan-11-3664-Tail	chrX	68821400	68821400	C	G	Fmr1nb-Gm6812	n.68821400C>G		intergenic_region	MODIFIER	131	0	0.009525	161	88	0.53	5.74945
Aplan-11-3664-Thy_vs_Aplan-11-3664-Tail	chrX	72929783	72929783	G	C	Nsdhl	c.234+1G>C		splice_donor_variant&intron_variant	HIGH	44	0	0.025	49	21	0.462	6.4629
Aplan-11-3664-Thy_vs_Aplan-11-3664-Tail	chrX	73545078	73545078	C	A	Atp2b3	c.2074C>A	p.Arg692Arg	synonymous_variant	LOW	28	0	0.037	45	20	0.436	5.09071
Aplan-11-3664-Thy_vs_Aplan-11-3664-Tail	chrX	73547805	73547805	G	C	Atp2b3	c.2596G>C	p.Val866Leu	missense_variant	MODERATE	44	0	0.026	47	24	0.513	6.28546
Aplan-11-3664-Thy_vs_Aplan-11-3664-Tail	chrX	74196996	74196996	C	G	Tktl1	c.680C>G	p.Ala227Gly	missense_variant	MODERATE	58	0	0.02	101	51	0.505	5.99201
Aplan-11-3664-Thy_vs_Aplan-11-3664-Tail	chrX	74235771	74235771	G	C	Flna	c.3654C>G	p.Thr1218Thr	synonymous_variant	LOW	64	0	0.018	77	28	0.363	6.66748
Aplan-11-3664-Thy_vs_Aplan-11-3664-Tail	chrX	74255922	74255922	C	G	Emd	c.402+46C>G		intron_variant	MODIFIER	42	1	0.048	61	20	0.333	3.98653
Aplan-11-3664-Thy_vs_Aplan-11-3664-Tail	chrX	75121441	75121441	C	G	Mpp1	c.474G>C	p.Ala158Ala	synonymous_variant	LOW	89	0	0.014	75	37	0.482	5.91307
Aplan-11-3664-Thy_vs_Aplan-11-3664-Tail	chrX	75260045	75260045	C	G	F8	c.6130G>C	p.Gly2044Arg	missense_variant	MODERATE	89	0	0.014	131	60	0.435	5.8875
Aplan-11-3664-Thy_vs_Aplan-11-3664-Tail	chrX	100310061	100310061	G	C	Eda	c.464G>C	p.Arg155Pro	missense_variant	MODERATE	48	0	0.026	67	27	0.365	5.95889
Aplan-11-3664-Thy_vs_Aplan-11-3664-Tail	chrX	101258499	101258499	G	C	Foxo4	c.776G>C	p.Arg259Pro	missense_variant	MODERATE	28	0	0.036	29	8	0.25	2.34887
Aplan-11-3664-Thy_vs_Aplan-11-3664-Tail	chrX	101732235	101732235	C	G	Cxcr3	c.820G>C	p.Val274Leu	missense_variant	MODERATE	50	0	0.023	37	22	0.571	6.31975
Aplan-11-3664-Thy_vs_Aplan-11-3664-Tail	chrX	102079252	102079252	C	G	Nhsl2	c.2660C>G	p.Pro887Arg	missense_variant	MODERATE	83	0	0.015	94	45	0.483	6.14113
Aplan-11-3664-Thy_vs_Aplan-11-3664-Tail	chrX	102079582	102079582	C	G	Nhsl2	c.2990C>G	p.Pro997Arg	missense_variant	MODERATE	50	1	0.045	43	22	0.513	6.41087
Aplan-11-3664-Thy_vs_Aplan-11-3664-Tail	chrX	133915370	133915370	C	G	Srpx2	c.148C>G	p.Arg50Gly	missense_variant	MODERATE	78	1	0.032	93	44	0.468	6.25893
Aplan-11-3664-Thy_vs_Aplan-11-3664-Tail	chrX	134434597	134434598	TG	T	Drp2	c.975+27delG		intron_variant	MODIFIER	23	0	0.046	33	18	0.589	5.25883
Aplan-11-3664-Thy_vs_Aplan-11-3664-Tail	chrX	140007755	140007755	G	C	Nup62cl	c.*20C>G		3_prime_UTR_variant	MODIFIER	79	0	0.014	148	27	0.2	5.27434
Aplan-11-3664-Thy_vs_Aplan-11-3664-Tail	chrX	153558673	153558673	G	C	Cypt3	c.61G>C	p.Ala21Pro	missense_variant	MODERATE	29	0	0.039	54	23	0.452	5.18356
Aplan-11-3664-Thy_vs_Aplan-11-3664-Tail	chrX	155586358	155586358	C	G	Ptchd1	c.1012+13G>C		intron_variant	MODIFIER	47	0	0.024	89	47	0.514	6.41783
Aplan-11-3668-BM_vs_Aplan-11th-Exp-Donor-BM-plus-Pooled-Tail-Ref	chr1	4347282	4347282	G	A	Rp1	c.3606C>T	p.Asp1202Asp	synonymous_variant	LOW	280	0	0.004148	130	61	0.455	6.05544
Aplan-11-3668-BM_vs_Aplan-11th-Exp-Donor-BM-plus-Pooled-Tail-Ref	chr1	16677081	16677081	G	C	Tmem70	c.421G>C	p.Gly141Arg	missense_variant	MODERATE	292	0	0.004061	123	58	0.459	5.78803
Aplan-11-3668-BM_vs_Aplan-11th-Exp-Donor-BM-plus-Pooled-Tail-Ref	chr1	26682179	26682179	G	C	4931408C20Rik	c.3919C>G	p.His1307Asp	missense_variant	MODERATE	350	0	0.003219	168	66	0.393	6.07607
Aplan-11-3668-BM_vs_Aplan-11th-Exp-Donor-BM-plus-Pooled-Tail-Ref	chr1	36702166	36702166	C	G	Actr1b	c.333G>C	p.Thr111Thr	synonymous_variant	LOW	71	0	0.017	35	14	0.366	5.99417
Aplan-11-3668-BM_vs_Aplan-11th-Exp-Donor-BM-plus-Pooled-Tail-Ref	chr1	36779800	36779800	C	G	Zap70	c.1267C>G	p.Arg423Gly	missense_variant	MODERATE	100	0	0.013	44	11	0.286	6.08601
Aplan-11-3668-BM_vs_Aplan-11th-Exp-Donor-BM-plus-Pooled-Tail-Ref	chr1	38865871	38865871	C	G	Chst10	c.752G>C	p.Arg251Pro	missense_variant	MODERATE	133	0	0.008762	107	30	0.322	6.20766
Aplan-11-3668-BM_vs_Aplan-11th-Exp-Donor-BM-plus-Pooled-Tail-Ref	chr1	40021153	40021153	C	G	Map4k4	c.3302C>G	p.Pro1101Arg	missense_variant	MODERATE	175	0	0.006992	153	69	0.45	5.84266
Aplan-11-3668-BM_vs_Aplan-11th-Exp-Donor-BM-plus-Pooled-Tail-Ref	chr1	40300785	40300785	C	G	Il1r1	c.756C>G	p.Asn252Lys	missense_variant	MODERATE	202	0	0.00611	117	46	0.401	5.8029
Aplan-11-3668-BM_vs_Aplan-11th-Exp-Donor-BM-plus-Pooled-Tail-Ref	chr1	58266720	58266720	C	G	Aox4	c.3882C>G	p.Ser1294Arg	missense_variant	MODERATE	63	0	0.018	46	15	0.343	6.2976
Aplan-11-3668-BM_vs_Aplan-11th-Exp-Donor-BM-plus-Pooled-Tail-Ref	chr1	59709018	59709018	C	G	Nop58	c.1284C>G	p.Tyr428*	stop_gained	HIGH	100	0	0.011	75	29	0.383	6.24845
Aplan-11-3668-BM_vs_Aplan-11th-Exp-Donor-BM-plus-Pooled-Tail-Ref	chr1	60289958	60289958	C	G	Nbeal1	c.6534C>G	p.Asn2178Lys	missense_variant	MODERATE	242	0	0.005347	131	55	0.429	6.005
Aplan-11-3668-BM_vs_Aplan-11th-Exp-Donor-BM-plus-Pooled-Tail-Ref	chr1	86428096	86428096	C	G	1700019O17Rik	c.*133C>G		downstream_gene_variant	MODIFIER	95	0	0.012	30	13	0.438	7.26405
Aplan-11-3668-BM_vs_Aplan-11th-Exp-Donor-BM-plus-Pooled-Tail-Ref	chr1	87475042	87475042	C	G	3110079O15Rik	c.93C>G	p.Pro31Pro	synonymous_variant	LOW	52	0	0.022	20	9	0.47	5.70479
Aplan-11-3668-BM_vs_Aplan-11th-Exp-Donor-BM-plus-Pooled-Tail-Ref	chr1	93312922	93312922	C	G	Pask	c.3721G>C	p.Gly1241Arg	missense_variant	MODERATE	72	3	0.066	27	16	0.577	6.75872
Aplan-11-3668-BM_vs_Aplan-11th-Exp-Donor-BM-plus-Pooled-Tail-Ref	chr1	110895373	110895373	G	C	Cdh19	c.1570+10C>G		intron_variant	MODIFIER	166	0	0.007444	87	34	0.375	6.10492
Aplan-11-3668-BM_vs_Aplan-11th-Exp-Donor-BM-plus-Pooled-Tail-Ref	chr1	116524283	116524283	G	C	Cntnap5a	c.3395G>C	p.Arg1132Pro	missense_variant	MODERATE	441	0	0.00291	284	106	0.371	5.56961
Aplan-11-3668-BM_vs_Aplan-11th-Exp-Donor-BM-plus-Pooled-Tail-Ref	chr1	128301213	128301213	C	G	Lct	c.2542G>C	p.Gly848Arg	missense_variant	MODERATE	165	0	0.006808	75	27	0.382	6.79721
Aplan-11-3668-BM_vs_Aplan-11th-Exp-Donor-BM-plus-Pooled-Tail-Ref	chr1	133738607	133738607	C	T	Atp2b4	c.706G>A	p.Glu236Lys	missense_variant	MODERATE	116	0	0.01	81	23	0.292	6.80056
Aplan-11-3668-BM_vs_Aplan-11th-Exp-Donor-BM-plus-Pooled-Tail-Ref	chr1	160989604	160989604	G	C	Serpinc1	c.267G>C	p.Ser89Ser	synonymous_variant	LOW	211	0	0.005659	93	48	0.503	6.17029
Aplan-11-3668-BM_vs_Aplan-11th-Exp-Donor-BM-plus-Pooled-Tail-Ref	chr1	180972030	180972030	C	G	Tmem63a	c.1964C>G	p.Pro655Arg	missense_variant	MODERATE	154	0	0.00867	29	7	0.24	5.89095
Aplan-11-3668-BM_vs_Aplan-11th-Exp-Donor-BM-plus-Pooled-Tail-Ref	chr2	3519458	3519458	G	C	Mir466b-2	n.-3843G>C		upstream_gene_variant	MODIFIER	100	0	0.012	37	13	0.394	6.45192
Aplan-11-3668-BM_vs_Aplan-11th-Exp-Donor-BM-plus-Pooled-Tail-Ref	chr2	25578962	25578962	G	C	Gm996	c.936C>G	p.Ser312Ser	synonymous_variant	LOW	278	0	0.004093	49	18	0.372	6.47262
Aplan-11-3668-BM_vs_Aplan-11th-Exp-Donor-BM-plus-Pooled-Tail-Ref	chr2	26206366	26206366	G	C	Lhx3	c.73C>G	p.Arg25Gly	missense_variant	MODERATE	34	0	0.036	16	6	0.429	3.29762
Aplan-11-3668-BM_vs_Aplan-11th-Exp-Donor-BM-plus-Pooled-Tail-Ref	chr2	32768950	32768950	G	C	Ttc16	c.1193C>G	p.Ala398Gly	missense_variant	MODERATE	82	1	0.013	27	11	0.429	6.46002
Aplan-11-3668-BM_vs_Aplan-11th-Exp-Donor-BM-plus-Pooled-Tail-Ref	chr2	32770119	32770119	G	C	Ttc16	c.847C>G	p.Arg283Gly	missense_variant	MODERATE	89	0	0.014	43	16	0.412	7.05897
Aplan-11-3668-BM_vs_Aplan-11th-Exp-Donor-BM-plus-Pooled-Tail-Ref	chr2	32946097	32946097	G	C	Lrsam1	c.775C>G	p.Arg259Gly	missense_variant	MODERATE	88	0	0.014	21	6	0.316	4.57192
Aplan-11-3668-BM_vs_Aplan-11th-Exp-Donor-BM-plus-Pooled-Tail-Ref	chr2	35003418	35003418	G	C	Hc	c.3795C>G	p.Leu1265Leu	synonymous_variant	LOW	139	0	0.009069	51	27	0.535	6.46869
Aplan-11-3668-BM_vs_Aplan-11th-Exp-Donor-BM-plus-Pooled-Tail-Ref	chr2	35380419	35380419	G	C	4930402F06Rik	c.269C>G	p.Pro90Arg	missense_variant	MODERATE	255	0	0.005273	105	38	0.337	5.79524
Aplan-11-3668-BM_vs_Aplan-11th-Exp-Donor-BM-plus-Pooled-Tail-Ref	chr2	35402483	35402483	G	C	Ggta1	c.847C>G	p.Gln283Glu	missense_variant	MODERATE	359	0	0.003428	89	43	0.474	5.94037
Aplan-11-3668-BM_vs_Aplan-11th-Exp-Donor-BM-plus-Pooled-Tail-Ref	chr2	37791123	37791123	G	C	Crb2	c.1977G>C	p.Thr659Thr	synonymous_variant	LOW	260	1	0.00459	62	26	0.404	6.76057
Aplan-11-3668-BM_vs_Aplan-11th-Exp-Donor-BM-plus-Pooled-Tail-Ref	chr2	37791311	37791311	G	C	Crb2	c.2165G>C	p.Gly722Ala	missense_variant	MODERATE	418	0	0.00295	53	22	0.428	6.47402
Aplan-11-3668-BM_vs_Aplan-11th-Exp-Donor-BM-plus-Pooled-Tail-Ref	chr2	37793808	37793808	G	C	Crb2	c.3321G>C	p.Ala1107Ala	synonymous_variant	LOW	52	0	0.021	17	12	0.61	7.13249
Aplan-11-3668-BM_vs_Aplan-11th-Exp-Donor-BM-plus-Pooled-Tail-Ref	chr2	38959932	38959932	C	G	Olfml2a	c.1659C>G	p.Ala553Ala	synonymous_variant	LOW	130	0	0.008288	69	26	0.414	6.49671
Aplan-11-3668-BM_vs_Aplan-11th-Exp-Donor-BM-plus-Pooled-Tail-Ref	chr2	41506741	41506741	G	C	Lrp1b	c.1312C>G	p.Arg438Gly	missense_variant	MODERATE	133	1	0.009444	94	31	0.32	5.96576
Aplan-11-3668-BM_vs_Aplan-11th-Exp-Donor-BM-plus-Pooled-Tail-Ref	chr2	82950922	82950922	G	C	Zfp804a-Zc3h15	n.82950922G>C		intergenic_region	MODIFIER	112	0	0.011	87	50	0.549	6.00837
Aplan-11-3668-BM_vs_Aplan-11th-Exp-Donor-BM-plus-Pooled-Tail-Ref	chr2	85042221	85042221	C	G	Ssrp1	c.1224-22C>G		intron_variant	MODIFIER	26	0	0.038	12	8	0.613	4.99473
Aplan-11-3668-BM_vs_Aplan-11th-Exp-Donor-BM-plus-Pooled-Tail-Ref	chr2	91128728	91128728	G	C	Mybpc3	c.2000G>C	p.Arg667Pro	missense_variant	MODERATE	160	0	0.007384	70	25	0.387	6.09193
Aplan-11-3668-BM_vs_Aplan-11th-Exp-Donor-BM-plus-Pooled-Tail-Ref	chr2	91135488	91135488	G	C	Mybpc3	c.3624+5G>C		splice_region_variant&intron_variant	LOW	132	0	0.009632	27	13	0.518	6.0897
Aplan-11-3668-BM_vs_Aplan-11th-Exp-Donor-BM-plus-Pooled-Tail-Ref	chr2	91177096	91177096	G	C	Madd	c.670C>G	p.Arg224Gly	missense_variant	MODERATE	47	0	0.024	42	22	0.517	6.99596
Aplan-11-3668-BM_vs_Aplan-11th-Exp-Donor-BM-plus-Pooled-Tail-Ref	chr2	91931169	91931169	G	C	Mdk	c.162C>G	p.Arg54Arg	synonymous_variant	LOW	157	0	0.007576	35	12	0.358	6.20247
Aplan-11-3668-BM_vs_Aplan-11th-Exp-Donor-BM-plus-Pooled-Tail-Ref	chr2	103041119	103041119	G	C	Pdhx	c.565C>G	p.Arg189Gly	missense_variant	MODERATE	114	0	0.011	67	29	0.4	6.08289
Aplan-11-3668-BM_vs_Aplan-11th-Exp-Donor-BM-plus-Pooled-Tail-Ref	chr2	119245654	119245654	G	C	Spint1	c.724+6G>C		splice_region_variant&intron_variant	LOW	211	0	0.005539	108	45	0.422	5.74124
Aplan-11-3668-BM_vs_Aplan-11th-Exp-Donor-BM-plus-Pooled-Tail-Ref	chr2	130637230	130637230	G	C	Lzts3	c.262C>G	p.Arg88Gly	missense_variant	MODERATE	148	1	0.008622	23	5	0.208	3.79618
Aplan-11-3668-BM_vs_Aplan-11th-Exp-Donor-BM-plus-Pooled-Tail-Ref	chr2	131139076	131139076	C	G	Hspa12b	c.549C>G	p.His183Gln	missense_variant	MODERATE	209	0	0.005916	43	24	0.53	6.88867
Aplan-11-3668-BM_vs_Aplan-11th-Exp-Donor-BM-plus-Pooled-Tail-Ref	chr2	145883353	145883353	G	C	Rin2	c.2124G>C	p.Ala708Ala	synonymous_variant	LOW	199	0	0.006395	59	20	0.353	6.49293
Aplan-11-3668-BM_vs_Aplan-11th-Exp-Donor-BM-plus-Pooled-Tail-Ref	chr2	151597143	151597143	G	C	Snph	c.373C>G	p.Arg125Gly	missense_variant	MODERATE	145	0	0.008432	34	17	0.462	7.17368
Aplan-11-3668-BM_vs_Aplan-11th-Exp-Donor-BM-plus-Pooled-Tail-Ref	chr2	153723557	153723557	G	C	Dnmt3b-Mapre1	n.153723557G>C		intergenic_region	MODIFIER	98	0	0.013	39	17	0.419	7.23287
Aplan-11-3668-BM_vs_Aplan-11th-Exp-Donor-BM-plus-Pooled-Tail-Ref	chr2	155174050	155174050	G	C	Itch	c.454G>C	p.Gly152Arg	missense_variant	MODERATE	157	0	0.008565	72	22	0.346	6.37662
Aplan-11-3668-BM_vs_Aplan-11th-Exp-Donor-BM-plus-Pooled-Tail-Ref	chr2	155650599	155650599	G	C	Trpc4ap	c.1052-14C>G		intron_variant	MODIFIER	66	0	0.017	17	9	0.53	7.13101
Aplan-11-3668-BM_vs_Aplan-11th-Exp-Donor-BM-plus-Pooled-Tail-Ref	chr2	163879177	163879177	G	C	Rims4	c.153C>G	p.Ala51Ala	synonymous_variant	LOW	70	0	0.018	11	5	0.5	4.74396
Aplan-11-3668-BM_vs_Aplan-11th-Exp-Donor-BM-plus-Pooled-Tail-Ref	chr2	167993588	167993588	G	C	Fam65c	c.462C>G	p.Asp154Glu	missense_variant	MODERATE	147	0	0.007492	29	9	0.322	7.5589
Aplan-11-3668-BM_vs_Aplan-11th-Exp-Donor-BM-plus-Pooled-Tail-Ref	chr2	168263100	168263100	G	C	Kcng1	c.825C>G	p.Cys275Trp	missense_variant	MODERATE	88	0	0.014	34	14	0.429	7.01267
Aplan-11-3668-BM_vs_Aplan-11th-Exp-Donor-BM-plus-Pooled-Tail-Ref	chr3	37714576	37714576	G	A	Gm5148	c.*29C>T		3_prime_UTR_variant	MODIFIER	82	0	0.014	56	28	0.51	6.14926
Aplan-11-3668-BM_vs_Aplan-11th-Exp-Donor-BM-plus-Pooled-Tail-Ref	chr3	45380173	45380173	C	G	Pcdh10	c.921C>G	p.Thr307Thr	synonymous_variant	LOW	278	1	0.004401	32	8	0.325	7.34145
Aplan-11-3668-BM_vs_Aplan-11th-Exp-Donor-BM-plus-Pooled-Tail-Ref	chr3	45399264	45399264	C	G	Pcdh10	c.3103+6390C>G		intron_variant	MODIFIER	220	0	0.005448	146	53	0.367	5.83645
Aplan-11-3668-BM_vs_Aplan-11th-Exp-Donor-BM-plus-Pooled-Tail-Ref	chr3	58616382	58616382	G	C	Erich6	c.2070C>G	p.Ala690Ala	synonymous_variant	LOW	116	0	0.01	102	41	0.418	6.33156
Aplan-11-3668-BM_vs_Aplan-11th-Exp-Donor-BM-plus-Pooled-Tail-Ref	chr3	62604511	62604511	C	G	Gpr149	c.66G>C	p.Thr22Thr	synonymous_variant	LOW	234	0	0.005153	144	51	0.385	6.18121
Aplan-11-3668-BM_vs_Aplan-11th-Exp-Donor-BM-plus-Pooled-Tail-Ref	chr3	78966363	78966363	G	C	Fstl5-Rapgef2	n.78966363G>C		intergenic_region	MODIFIER	369	0	0.003292	183	85	0.456	5.63545
Aplan-11-3668-BM_vs_Aplan-11th-Exp-Donor-BM-plus-Pooled-Tail-Ref	chr3	84031629	84031629	C	G	D930015E06Rik	c.219G>C	p.Glu73Asp	missense_variant	MODERATE	437	0	0.002955	174	65	0.389	5.78685
Aplan-11-3668-BM_vs_Aplan-11th-Exp-Donor-BM-plus-Pooled-Tail-Ref	chr3	87870050	87870050	G	C	Prcc	c.616C>G	p.Arg206Gly	missense_variant	MODERATE	177	0	0.006811	43	19	0.436	7.01879
Aplan-11-3668-BM_vs_Aplan-11th-Exp-Donor-BM-plus-Pooled-Tail-Ref	chr3	88074866	88074866	G	C	Ttc24	c.58C>G	p.Arg20Gly	missense_variant	MODERATE	318	0	0.003938	54	20	0.355	6.93959
Aplan-11-3668-BM_vs_Aplan-11th-Exp-Donor-BM-plus-Pooled-Tail-Ref	chr3	88436955	88436955	G	C	Sema4a	c.1988C>G	p.Pro663Arg	missense_variant	MODERATE	91	0	0.012	32	12	0.345	6.07988
Aplan-11-3668-BM_vs_Aplan-11th-Exp-Donor-BM-plus-Pooled-Tail-Ref	chr3	88542672	88542672	G	C	Mex3a	c.*5491G>C		downstream_gene_variant	MODIFIER	103	0	0.012	54	18	0.348	6.21638
Aplan-11-3668-BM_vs_Aplan-11th-Exp-Donor-BM-plus-Pooled-Tail-Ref	chr3	89334824	89334824	G	C	Efna4	c.436C>G	p.Arg146Gly	missense_variant	MODERATE	83	0	0.014	39	16	0.437	7.28739
Aplan-11-3668-BM_vs_Aplan-11th-Exp-Donor-BM-plus-Pooled-Tail-Ref	chr3	89379631	89379631	C	G	Zbtb7b	c.1530G>C	p.Ser510Ser	synonymous_variant	LOW	256	0	0.004867	33	15	0.479	6.70693
Aplan-11-3668-BM_vs_Aplan-11th-Exp-Donor-BM-plus-Pooled-Tail-Ref	chr3	89380410	89380410	C	G	Zbtb7b	c.1100G>C	p.Arg367Pro	missense_variant	MODERATE	123	0	0.008704	37	21	0.598	6.35146
Aplan-11-3668-BM_vs_Aplan-11th-Exp-Donor-BM-plus-Pooled-Tail-Ref	chr3	90242782	90242782	C	G	Creb3l4	c.51G>C	p.Ser17Ser	synonymous_variant	LOW	222	0	0.005557	39	10	0.271	6.85249
Aplan-11-3668-BM_vs_Aplan-11th-Exp-Donor-BM-plus-Pooled-Tail-Ref	chr3	94775084	94775084	C	G	Cgn	c.1236-52G>C		intron_variant	MODIFIER	189	0	0.006498	59	20	0.359	6.24738
Aplan-11-3668-BM_vs_Aplan-11th-Exp-Donor-BM-plus-Pooled-Tail-Ref	chr3	95240700	95240700	G	C	Gm128	c.282C>G	p.Thr94Thr	synonymous_variant	LOW	89	0	0.013	38	14	0.382	6.49839
Aplan-11-3668-BM_vs_Aplan-11th-Exp-Donor-BM-plus-Pooled-Tail-Ref	chr3	95460321	95460321	G	C	Arnt	c.183-56G>C		intron_variant	MODIFIER	220	1	0.005714	126	49	0.396	5.70907
Aplan-11-3668-BM_vs_Aplan-11th-Exp-Donor-BM-plus-Pooled-Tail-Ref	chr3	95734876	95734876	T	C	Ecm1	c.1396A>G	p.Ile466Val	missense_variant	MODERATE	352	24	0.065	44	40	0.888	6.08339
Aplan-11-3668-BM_vs_Aplan-11th-Exp-Donor-BM-plus-Pooled-Tail-Ref	chr3	95736981	95736981	G	C	Mir7014	n.-2008C>G		upstream_gene_variant	MODIFIER	221	0	0.005531	53	18	0.396	6.24833
Aplan-11-3668-BM_vs_Aplan-11th-Exp-Donor-BM-plus-Pooled-Tail-Ref	chr3	96579977	96579977	G	C	Polr3gl	c.456+39C>G		intron_variant	MODIFIER	159	0	0.007949	73	24	0.358	6.30321
Aplan-11-3668-BM_vs_Aplan-11th-Exp-Donor-BM-plus-Pooled-Tail-Ref	chr3	108464392	108464392	C	T	5330417C22Rik	c.1859G>A	p.Arg620Gln	missense_variant	MODERATE	54	0	0.024	29	6	0.208	2.90014
Aplan-11-3668-BM_vs_Aplan-11th-Exp-Donor-BM-plus-Pooled-Tail-Ref	chr3	121450055	121450055	G	C	Cnn3	c.164G>C	p.Gly55Ala	missense_variant	MODERATE	272	0	0.004955	82	34	0.443	6.42971
Aplan-11-3668-BM_vs_Aplan-11th-Exp-Donor-BM-plus-Pooled-Tail-Ref	chr3	144823468	144823468	G	C	Clca3b	c.2444C>G	p.Thr815Ser	missense_variant	MODERATE	133	0	0.009797	83	15	0.203	6.59916
Aplan-11-3668-BM_vs_Aplan-11th-Exp-Donor-BM-plus-Pooled-Tail-Ref	chr3	153905958	153905958	G	C	Msh4	c.27C>G	p.Arg9Arg	synonymous_variant	LOW	70	0	0.015	10	5	0.455	4.97953
Aplan-11-3668-BM_vs_Aplan-11th-Exp-Donor-BM-plus-Pooled-Tail-Ref	chr4	10848549	10848549	C	G	1700123O12Rik-2610301B20Rik	n.10848549C>G		intergenic_region	MODIFIER	34	0	0.028	32	15	0.473	5.67613
Aplan-11-3668-BM_vs_Aplan-11th-Exp-Donor-BM-plus-Pooled-Tail-Ref	chr4	43021699	43021699	C	G	Pigo	c.1242G>C	p.Ala414Ala	synonymous_variant	LOW	67	0	0.018	23	8	0.304	5.19891
Aplan-11-3668-BM_vs_Aplan-11th-Exp-Donor-BM-plus-Pooled-Tail-Ref	chr4	43660105	43660105	C	T	Fam221b	c.1358G>A	p.Arg453Gln	missense_variant	MODERATE	148	0	0.007954	49	21	0.442	6.69855
Aplan-11-3668-BM_vs_Aplan-11th-Exp-Donor-BM-plus-Pooled-Tail-Ref	chr4	58948895	58948895	G	C	Zkscan16	c.449G>C	p.Gly150Ala	missense_variant	MODERATE	89	0	0.013	27	16	0.524	6.86743
Aplan-11-3668-BM_vs_Aplan-11th-Exp-Donor-BM-plus-Pooled-Tail-Ref	chr4	63861072	63861072	C	G	Tnfsf8	c.-13G>C		5_prime_UTR_variant	MODIFIER	78	0	0.014	11	7	0.584	7.31972
Aplan-11-3668-BM_vs_Aplan-11th-Exp-Donor-BM-plus-Pooled-Tail-Ref	chr4	65196860	65196860	C	G	Pappa	c.2192C>G	p.Pro731Arg	missense_variant	MODERATE	174	0	0.00673	77	38	0.484	6.38863
Aplan-11-3668-BM_vs_Aplan-11th-Exp-Donor-BM-plus-Pooled-Tail-Ref	chr4	65613915	65613915	C	G	Trim32	c.708C>G	p.Ala236Ala	synonymous_variant	LOW	75	0	0.014	29	5	0.221	2.88896
Aplan-11-3668-BM_vs_Aplan-11th-Exp-Donor-BM-plus-Pooled-Tail-Ref	chr4	88780661	88780661	C	G	Ifnz	c.-2125C>G		upstream_gene_variant	MODIFIER	488	0	0.002509	276	116	0.419	5.72337
Aplan-11-3668-BM_vs_Aplan-11th-Exp-Donor-BM-plus-Pooled-Tail-Ref	chr4	88783448	88783448	C	G	Ifnz	c.*114C>G		3_prime_UTR_variant	MODIFIER	715	0	0.001663	430	189	0.445	5.5958
Aplan-11-3668-BM_vs_Aplan-11th-Exp-Donor-BM-plus-Pooled-Tail-Ref	chr4	88795223	88795223	C	G	Gm13275	c.*188C>G		3_prime_UTR_variant	MODIFIER	730	0	0.001679	471	182	0.39	5.65556
Aplan-11-3668-BM_vs_Aplan-11th-Exp-Donor-BM-plus-Pooled-Tail-Ref	chr4	107880973	107880973	C	G	Lrp8	c.*8662C>G		downstream_gene_variant	MODIFIER	100	0	0.012	87	19	0.242	6.82471
Aplan-11-3668-BM_vs_Aplan-11th-Exp-Donor-BM-plus-Pooled-Tail-Ref	chr4	123323308	123323308	G	C	Oxct2a	c.279C>G	p.Gly93Gly	synonymous_variant	LOW	113	0	0.009798	60	26	0.455	6.63888
Aplan-11-3668-BM_vs_Aplan-11th-Exp-Donor-BM-plus-Pooled-Tail-Ref	chr4	123472264	123472264	G	C	Macf1	c.8703C>G	p.His2901Gln	missense_variant	MODERATE	488	0	0.002351	224	93	0.411	5.70206
Aplan-11-3668-BM_vs_Aplan-11th-Exp-Donor-BM-plus-Pooled-Tail-Ref	chr4	123527254	123527254	G	C	Macf1	c.543+8948C>G		intron_variant	MODIFIER	249	0	0.004942	97	17	0.202	6.74258
Aplan-11-3668-BM_vs_Aplan-11th-Exp-Donor-BM-plus-Pooled-Tail-Ref	chr4	124793335	124793335	G	C	Inpp5b	c.2353G>C	p.Gly785Arg	missense_variant	MODERATE	146	0	0.007362	80	28	0.347	6.10873
Aplan-11-3668-BM_vs_Aplan-11th-Exp-Donor-BM-plus-Pooled-Tail-Ref	chr4	129578396	129578396	C	T	Fam167b	c.-21G>A		5_prime_UTR_variant	MODIFIER	127	0	0.009585	49	21	0.439	7.05553
Aplan-11-3668-BM_vs_Aplan-11th-Exp-Donor-BM-plus-Pooled-Tail-Ref	chr4	129899850	129899850	G	C	Ptp4a2-E330017L17Rik	n.129899850G>C		intergenic_region	MODIFIER	78	0	0.013	41	18	0.461	6.45827
Aplan-11-3668-BM_vs_Aplan-11th-Exp-Donor-BM-plus-Pooled-Tail-Ref	chr4	130730484	130730484	C	A	Pum1	c.1094C>A	p.Thr365Lys	missense_variant	MODERATE	148	0	0.007811	57	24	0.429	6.43122
Aplan-11-3668-BM_vs_Aplan-11th-Exp-Donor-BM-plus-Pooled-Tail-Ref	chr4	134123600	134123600	G	C	Ubxn11	c.762G>C	p.Thr254Thr	synonymous_variant	LOW	97	0	0.01	30	15	0.517	7.3097
Aplan-11-3668-BM_vs_Aplan-11th-Exp-Donor-BM-plus-Pooled-Tail-Ref	chr4	134152110	134152110	C	G	Cep85	c.1332G>C	p.Glu444Asp	missense_variant	MODERATE	198	0	0.006364	90	31	0.335	6.64296
Aplan-11-3668-BM_vs_Aplan-11th-Exp-Donor-BM-plus-Pooled-Tail-Ref	chr4	134154219	134154219	C	G	Cep85	c.1034+44G>C		intron_variant	MODIFIER	65	0	0.018	19	5	0.278	3.42406
Aplan-11-3668-BM_vs_Aplan-11th-Exp-Donor-BM-plus-Pooled-Tail-Ref	chr4	137543985	137543985	C	G	Hspg2	c.7432C>G	p.Arg2478Gly	missense_variant	MODERATE	60	1	0.02	39	12	0.353	4.40623
Aplan-11-3668-BM_vs_Aplan-11th-Exp-Donor-BM-plus-Pooled-Tail-Ref	chr4	139479504	139479504	G	A	Ubr4	c.14733G>A	p.Thr4911Thr	synonymous_variant	LOW	135	0	0.009428	45	16	0.385	7.27336
Aplan-11-3668-BM_vs_Aplan-11th-Exp-Donor-BM-plus-Pooled-Tail-Ref	chr4	140933265	140933265	G	C	Padi2	c.1055G>C	p.Arg352Pro	missense_variant	MODERATE	102	0	0.012	58	22	0.389	6.5459
Aplan-11-3668-BM_vs_Aplan-11th-Exp-Donor-BM-plus-Pooled-Tail-Ref	chr4	140995342	140995342	C	G	Atp13a2	c.559C>G	p.Arg187Gly	missense_variant	MODERATE	156	0	0.007553	38	23	0.606	6.53328
Aplan-11-3668-BM_vs_Aplan-11th-Exp-Donor-BM-plus-Pooled-Tail-Ref	chr4	141104879	141104879	G	C	Spata21	c.1350G>C	p.Ala450Ala	synonymous_variant	LOW	88	0	0.013	31	20	0.634	6.29301
Aplan-11-3668-BM_vs_Aplan-11th-Exp-Donor-BM-plus-Pooled-Tail-Ref	chr4	141120294	141120294	G	C	Szrd1	c.101+30C>G		intron_variant	MODIFIER	148	0	0.008833	83	30	0.357	6.19412
Aplan-11-3668-BM_vs_Aplan-11th-Exp-Donor-BM-plus-Pooled-Tail-Ref	chr5	3700401	3700401	G	C	Ankib1	c.2241C>G	p.Ala747Ala	synonymous_variant	LOW	392	0	0.003272	153	62	0.399	6.17852
Aplan-11-3668-BM_vs_Aplan-11th-Exp-Donor-BM-plus-Pooled-Tail-Ref	chr5	8864184	8864184	G	C	Abcb1b	c.3553G>C	p.Ala1185Pro	missense_variant	MODERATE	195	0	0.00624	156	63	0.407	5.91565
Aplan-11-3668-BM_vs_Aplan-11th-Exp-Donor-BM-plus-Pooled-Tail-Ref	chr5	23831404	23831404	G	C	Mir3471-1	n.87-17334C>G		intron_variant	MODIFIER	109	0	0.011	24	8	0.353	6.42553
Aplan-11-3668-BM_vs_Aplan-11th-Exp-Donor-BM-plus-Pooled-Tail-Ref	chr5	24326644	24326644	G	C	Kcnh2	c.1268C>G	p.Thr423Arg	missense_variant	MODERATE	58	0	0.019	19	12	0.619	6.91844
Aplan-11-3668-BM_vs_Aplan-11th-Exp-Donor-BM-plus-Pooled-Tail-Ref	chr5	24876932	24876932	G	C	Prkag2	c.1042+57C>G		intron_variant	MODIFIER	259	0	0.004735	147	63	0.435	6.20715
Aplan-11-3668-BM_vs_Aplan-11th-Exp-Donor-BM-plus-Pooled-Tail-Ref	chr5	31069032	31069032	G	C	Cad	c.3417G>C	p.Ala1139Ala	synonymous_variant	LOW	82	0	0.013	24	11	0.48	6.231
Aplan-11-3668-BM_vs_Aplan-11th-Exp-Donor-BM-plus-Pooled-Tail-Ref	chr5	33652245	33652245	G	C	Slbp	c.9C>G	p.Cys3Trp	missense_variant	MODERATE	35	0	0.03	40	24	0.571	5.9755
Aplan-11-3668-BM_vs_Aplan-11th-Exp-Donor-BM-plus-Pooled-Tail-Ref	chr5	36816072	36816072	G	C	Man2b2	c.1562C>G	p.Pro521Arg	missense_variant	MODERATE	189	0	0.006761	41	6	0.206	4.63162
Aplan-11-3668-BM_vs_Aplan-11th-Exp-Donor-BM-plus-Pooled-Tail-Ref	chr5	43722399	43722399	G	C	Cc2d2a	c.3317G>C	p.Arg1106Pro	missense_variant	MODERATE	135	0	0.008945	82	29	0.384	6.36999
Aplan-11-3668-BM_vs_Aplan-11th-Exp-Donor-BM-plus-Pooled-Tail-Ref	chr5	65390826	65390826	G	C	Rpl9	c.75C>G	p.Val25Val	synonymous_variant	LOW	143	0	0.008634	83	35	0.446	5.81711
Aplan-11-3668-BM_vs_Aplan-11th-Exp-Donor-BM-plus-Pooled-Tail-Ref	chr5	65763591	65763591	G	C	N4bp2	c.-491+1G>C		splice_donor_variant&intron_variant	HIGH	64	0	0.021	11	5	0.5	4.57238
Aplan-11-3668-BM_vs_Aplan-11th-Exp-Donor-BM-plus-Pooled-Tail-Ref	chr5	66026182	66026182	G	C	Rbm47	c.1077C>G	p.Tyr359*	stop_gained	HIGH	149	0	0.007887	45	22	0.488	6.76391
Aplan-11-3668-BM_vs_Aplan-11th-Exp-Donor-BM-plus-Pooled-Tail-Ref	chr5	66261185	66261185	G	C	Nsun7	c.257G>C	p.Arg86Pro	missense_variant	MODERATE	165	0	0.007839	70	29	0.396	6.33559
Aplan-11-3668-BM_vs_Aplan-11th-Exp-Donor-BM-plus-Pooled-Tail-Ref	chr5	66294912	66294912	G	C	Nsun7	c.1542G>C	p.Glu514Asp	missense_variant&splice_region_variant	MODERATE	181	0	0.006383	115	38	0.367	5.9077
Aplan-11-3668-BM_vs_Aplan-11th-Exp-Donor-BM-plus-Pooled-Tail-Ref	chr5	73068778	73068778	G	C	Fryl	c.5541C>G	p.Ser1847Ser	synonymous_variant	LOW	89	0	0.014	22	10	0.5	6.05974
Aplan-11-3668-BM_vs_Aplan-11th-Exp-Donor-BM-plus-Pooled-Tail-Ref	chr5	75964871	75964871	G	T	Kdr	c.1051C>A	p.Arg351Arg	synonymous_variant	LOW	230	0	0.005504	129	42	0.359	5.8517
Aplan-11-3668-BM_vs_Aplan-11th-Exp-Donor-BM-plus-Pooled-Tail-Ref	chr5	90759963	90759963	G	C	Cxcl5	c.255-4G>C		splice_region_variant&intron_variant	LOW	121	0	0.01	50	25	0.488	6.72988
Aplan-11-3668-BM_vs_Aplan-11th-Exp-Donor-BM-plus-Pooled-Tail-Ref	chr5	92402021	92402021	G	C	Art3	c.804G>C	p.Ala268Ala	synonymous_variant	LOW	164	0	0.007889	130	51	0.396	6.11679
Aplan-11-3668-BM_vs_Aplan-11th-Exp-Donor-BM-plus-Pooled-Tail-Ref	chr5	101882581	101882581	G	C	Wdfy3	c.7060C>G	p.Arg2354Gly	missense_variant	MODERATE	84	0	0.015	39	13	0.394	7.17956
Aplan-11-3668-BM_vs_Aplan-11th-Exp-Donor-BM-plus-Pooled-Tail-Ref	chr5	107721731	107721731	G	C	Gfi1	c.632C>G	p.Ala211Gly	missense_variant	MODERATE	51	0	0.024	6	5	0.667	5.84376
Aplan-11-3668-BM_vs_Aplan-11th-Exp-Donor-BM-plus-Pooled-Tail-Ref	chr5	108674000	108674000	G	C	Slc26a1	c.70C>G	p.Gln24Glu	missense_variant	MODERATE	113	0	0.011	37	13	0.384	6.93436
Aplan-11-3668-BM_vs_Aplan-11th-Exp-Donor-BM-plus-Pooled-Tail-Ref	chr5	113943320	113943320	G	C	Ssh1	c.2048C>G	p.Pro683Arg	missense_variant	MODERATE	155	0	0.00732	50	20	0.417	6.20454
Aplan-11-3668-BM_vs_Aplan-11th-Exp-Donor-BM-plus-Pooled-Tail-Ref	chr5	113958735	113958735	G	C	Ssh1	c.710C>G	p.Ser237Cys	missense_variant	MODERATE	112	0	0.012	26	8	0.355	6.23
Aplan-11-3668-BM_vs_Aplan-11th-Exp-Donor-BM-plus-Pooled-Tail-Ref	chr5	114273009	114273009	G	C	Foxn4	c.50C>G	p.Ser17Trp	missense_variant	MODERATE	138	0	0.01	43	17	0.437	6.94797
Aplan-11-3668-BM_vs_Aplan-11th-Exp-Donor-BM-plus-Pooled-Tail-Ref	chr5	115348925	115348925	G	C	Cox6a1	c.26C>G	p.Ala9Gly	missense_variant	MODERATE	24	0	0.053	11	5	0.417	2.84675
Aplan-11-3668-BM_vs_Aplan-11th-Exp-Donor-BM-plus-Pooled-Tail-Ref	chr5	115859238	115859238	G	C	Cit	c.279G>C	p.Ser93Ser	synonymous_variant	LOW	140	0	0.009114	43	24	0.528	6.90893
Aplan-11-3668-BM_vs_Aplan-11th-Exp-Donor-BM-plus-Pooled-Tail-Ref	chr5	120761788	120761788	G	C	Oas3	c.2030C>G	p.Pro677Arg	missense_variant	MODERATE	149	0	0.007949	43	13	0.324	7.34238
Aplan-11-3668-BM_vs_Aplan-11th-Exp-Donor-BM-plus-Pooled-Tail-Ref	chr5	121143097	121143097	G	C	Ptpn11	c.1517C>G	p.Ser506Trp	missense_variant	MODERATE	123	0	0.009519	78	37	0.457	5.95587
Aplan-11-3668-BM_vs_Aplan-11th-Exp-Donor-BM-plus-Pooled-Tail-Ref	chr5	121622809	121622809	G	C	Acad10	c.2831C>G	p.Thr944Arg	missense_variant	MODERATE	99	0	0.012	60	21	0.382	6.90641
Aplan-11-3668-BM_vs_Aplan-11th-Exp-Donor-BM-plus-Pooled-Tail-Ref	chr5	122657045	122657045	C	G	P2rx7	c.397C>G	p.Arg133Gly	missense_variant	MODERATE	148	0	0.008798	88	31	0.377	6.52863
Aplan-11-3668-BM_vs_Aplan-11th-Exp-Donor-BM-plus-Pooled-Tail-Ref	chr5	122663573	122663573	C	G	P2rx7	c.534-4C>G		splice_region_variant&intron_variant	LOW	285	0	0.004711	76	27	0.322	6.02736
Aplan-11-3668-BM_vs_Aplan-11th-Exp-Donor-BM-plus-Pooled-Tail-Ref	chr5	122673815	122673815	G	C	P2rx7	c.1188G>C	p.Pro396Pro	splice_region_variant&synonymous_variant	LOW	140	1	0.008361	60	15	0.236	5.98185
Aplan-11-3668-BM_vs_Aplan-11th-Exp-Donor-BM-plus-Pooled-Tail-Ref	chr5	123029351	123029351	C	G	Orai1	c.586C>G	p.Leu196Val	missense_variant	MODERATE	110	0	0.009841	56	25	0.429	6.46671
Aplan-11-3668-BM_vs_Aplan-11th-Exp-Donor-BM-plus-Pooled-Tail-Ref	chr5	123287185	123287185	G	C	Psmd9-Bcl7a	n.123287185G>C		intergenic_region	MODIFIER	124	1	0.009985	40	12	0.324	6.93861
Aplan-11-3668-BM_vs_Aplan-11th-Exp-Donor-BM-plus-Pooled-Tail-Ref	chr5	123510996	123510996	G	C	B3gnt4	c.423G>C	p.Pro141Pro	synonymous_variant	LOW	110	0	0.009695	68	30	0.444	6.31933
Aplan-11-3668-BM_vs_Aplan-11th-Exp-Donor-BM-plus-Pooled-Tail-Ref	chr5	123533873	123533873	G	C	Vps33a	c.1431C>G	p.Asp477Glu	missense_variant	MODERATE	85	0	0.014	33	8	0.266	4.72171
Aplan-11-3668-BM_vs_Aplan-11th-Exp-Donor-BM-plus-Pooled-Tail-Ref	chr5	124123492	124123492	G	C	Pitpnm2	c.2955+51C>G		intron_variant	MODIFIER	159	0	0.008082	26	11	0.458	6.60296
Aplan-11-3668-BM_vs_Aplan-11th-Exp-Donor-BM-plus-Pooled-Tail-Ref	chr5	124794294	124794294	G	C	Dnah10	c.7377G>C	p.Glu2459Asp	missense_variant	MODERATE	171	1	0.007644	78	34	0.441	5.79151
Aplan-11-3668-BM_vs_Aplan-11th-Exp-Donor-BM-plus-Pooled-Tail-Ref	chr5	124816118	124816118	G	C	Dnah10	c.10115G>C	p.Arg3372Pro	missense_variant	MODERATE	162	0	0.0075	15	6	0.466	6.89391
Aplan-11-3668-BM_vs_Aplan-11th-Exp-Donor-BM-plus-Pooled-Tail-Ref	chr5	125019880	125019880	G	C	Ncor2	c.6984C>G	p.Pro2328Pro	synonymous_variant	LOW	125	0	0.01	32	13	0.44	6.51848
Aplan-11-3668-BM_vs_Aplan-11th-Exp-Donor-BM-plus-Pooled-Tail-Ref	chr5	125025094	125025094	G	C	Ncor2	c.6382C>G	p.Arg2128Gly	missense_variant	MODERATE	199	1	0.013	36	15	0.389	6.19438
Aplan-11-3668-BM_vs_Aplan-11th-Exp-Donor-BM-plus-Pooled-Tail-Ref	chr5	134404739	134404739	G	C	Gtf2ird1	c.833C>G	p.Pro278Arg	missense_variant	MODERATE	273	0	0.004494	76	34	0.469	6.14243
Aplan-11-3668-BM_vs_Aplan-11th-Exp-Donor-BM-plus-Pooled-Tail-Ref	chr5	134665952	134665952	G	C	Limk1	c.943C>G	p.Arg315Gly	missense_variant	MODERATE	136	0	0.009398	27	12	0.417	6.78686
Aplan-11-3668-BM_vs_Aplan-11th-Exp-Donor-BM-plus-Pooled-Tail-Ref	chr5	135133385	135133385	G	C	Mlxipl	c.1835G>C	p.Arg612Pro	missense_variant	MODERATE	272	0	0.004305	44	23	0.524	6.25799
Aplan-11-3668-BM_vs_Aplan-11th-Exp-Donor-BM-plus-Pooled-Tail-Ref	chr5	135422174	135422174	C	G	Hip1	c.2583G>C	p.Thr861Thr	synonymous_variant	LOW	181	0	0.006964	69	31	0.436	6.18264
Aplan-11-3668-BM_vs_Aplan-11th-Exp-Donor-BM-plus-Pooled-Tail-Ref	chr5	135753899	135753899	C	G	Styxl1	c.767G>C	p.Arg256Pro	missense_variant	MODERATE	183	0	0.007028	76	34	0.43	6.14912
Aplan-11-3668-BM_vs_Aplan-11th-Exp-Donor-BM-plus-Pooled-Tail-Ref	chr5	136982546	136982546	G	C	Znhit1	c.427C>G	p.Arg143Gly	missense_variant	MODERATE	196	0	0.006277	72	32	0.424	6.00285
Aplan-11-3668-BM_vs_Aplan-11th-Exp-Donor-BM-plus-Pooled-Tail-Ref	chr5	136985003	136985003	G	C	Znhit1	c.81C>G	p.Ala27Ala	synonymous_variant	LOW	131	0	0.008997	41	20	0.528	6.52135
Aplan-11-3668-BM_vs_Aplan-11th-Exp-Donor-BM-plus-Pooled-Tail-Ref	chr5	136986095	136986095	G	C	Plod3	c.-1591G>C		upstream_gene_variant	MODIFIER	123	0	0.009464	67	20	0.293	6.87392
Aplan-11-3668-BM_vs_Aplan-11th-Exp-Donor-BM-plus-Pooled-Tail-Ref	chr5	137731742	137731742	G	C	Nyap1	c.2442C>G	p.Arg814Arg	synonymous_variant	LOW	108	0	0.011	23	6	0.333	4.79176
Aplan-11-3668-BM_vs_Aplan-11th-Exp-Donor-BM-plus-Pooled-Tail-Ref	chr5	137733127	137733127	G	A	Nyap1	c.2174C>T	p.Ala725Val	missense_variant	MODERATE	89	0	0.014	41	21	0.514	6.34728
Aplan-11-3668-BM_vs_Aplan-11th-Exp-Donor-BM-plus-Pooled-Tail-Ref	chr5	139758163	139758163	G	C	Ints1	c.4649C>G	p.Ala1550Gly	missense_variant	MODERATE	110	0	0.01	42	12	0.294	7.26459
Aplan-11-3668-BM_vs_Aplan-11th-Exp-Donor-BM-plus-Pooled-Tail-Ref	chr5	140009194	140009194	G	C	Mad1l1	c.2076C>G	p.His692Gln	missense_variant	MODERATE	84	0	0.015	27	16	0.583	6.61428
Aplan-11-3668-BM_vs_Aplan-11th-Exp-Donor-BM-plus-Pooled-Tail-Ref	chr5	140686073	140686073	G	C	Iqce	c.796C>G	p.Leu266Val	missense_variant	MODERATE	101	0	0.011	40	12	0.353	7.15408
Aplan-11-3668-BM_vs_Aplan-11th-Exp-Donor-BM-plus-Pooled-Tail-Ref	chr5	148921359	148921359	G	C	Katnal1	c.40C>G	p.Arg14Gly	missense_variant	MODERATE	221	0	0.005876	59	20	0.354	7.00341
Aplan-11-3668-BM_vs_Aplan-11th-Exp-Donor-BM-plus-Pooled-Tail-Ref	chr6	17710724	17710724	G	C	St7	c.151+16362G>C		intron_variant	MODIFIER	69	0	0.017	53	18	0.348	7.36505
Aplan-11-3668-BM_vs_Aplan-11th-Exp-Donor-BM-plus-Pooled-Tail-Ref	chr6	41033113	41033113	G	C	2210010C04Rik	c.286C>G	p.Arg96Gly	missense_variant	MODERATE	228	0	0.005549	106	43	0.439	6.14253
Aplan-11-3668-BM_vs_Aplan-11th-Exp-Donor-BM-plus-Pooled-Tail-Ref	chr6	51575989	51575989	C	G	Snx10	c.111C>G	p.His37Gln	missense_variant&splice_region_variant	MODERATE	167	0	0.007649	73	31	0.408	6.17682
Aplan-11-3668-BM_vs_Aplan-11th-Exp-Donor-BM-plus-Pooled-Tail-Ref	chr6	54218607	54218607	G	C	Chn2	c.260G>C	p.Arg87Pro	missense_variant	MODERATE	151	0	0.008241	39	12	0.314	7.10078
Aplan-11-3668-BM_vs_Aplan-11th-Exp-Donor-BM-plus-Pooled-Tail-Ref	chr6	56778858	56778858	G	C	Kbtbd2	c.*20C>G		3_prime_UTR_variant	MODIFIER	151	0	0.007353	63	17	0.268	6.62438
Aplan-11-3668-BM_vs_Aplan-11th-Exp-Donor-BM-plus-Pooled-Tail-Ref	chr6	69823644	69823644	C	A	Rprl1-Rpia	n.69823644C>A		intergenic_region	MODIFIER	246	0	0.00457	145	56	0.382	6.0916
Aplan-11-3668-BM_vs_Aplan-11th-Exp-Donor-BM-plus-Pooled-Tail-Ref	chr6	72556165	72556165	G	C	Capg	c.432G>C	p.Lys144Asn	missense_variant	MODERATE	98	0	0.012	46	21	0.455	6.12098
Aplan-11-3668-BM_vs_Aplan-11th-Exp-Donor-BM-plus-Pooled-Tail-Ref	chr6	83182560	83182560	G	C	Dctn1	c.70G>C	p.Ala24Pro	missense_variant	MODERATE	95	0	0.013	39	20	0.531	6.40275
Aplan-11-3668-BM_vs_Aplan-11th-Exp-Donor-BM-plus-Pooled-Tail-Ref	chr6	97354016	97354016	G	C	Frmd4b	c.385C>G	p.Leu129Val	missense_variant	MODERATE	123	0	0.00986	63	35	0.534	6.25106
Aplan-11-3668-BM_vs_Aplan-11th-Exp-Donor-BM-plus-Pooled-Tail-Ref	chr6	108440595	108440595	G	C	Itpr1	c.5425G>C	p.Asp1809His	missense_variant	MODERATE	81	0	0.013	36	14	0.378	6.38165
Aplan-11-3668-BM_vs_Aplan-11th-Exp-Donor-BM-plus-Pooled-Tail-Ref	chr6	113468460	113468460	G	C	Il17re	c.1131G>C	p.Thr377Thr	synonymous_variant	LOW	333	0	0.003913	90	35	0.42	6.73292
Aplan-11-3668-BM_vs_Aplan-11th-Exp-Donor-BM-plus-Pooled-Tail-Ref	chr6	119440287	119440287	G	C	Wnt5b	c.616C>G	p.Arg206Gly	missense_variant	MODERATE	120	0	0.009772	31	16	0.519	6.09938
Aplan-11-3668-BM_vs_Aplan-11th-Exp-Donor-BM-plus-Pooled-Tail-Ref	chr6	124866213	124866213	G	C	Cd4	c.*32C>G		3_prime_UTR_variant	MODIFIER	68	0	0.019	15	7	0.467	5.8097
Aplan-11-3668-BM_vs_Aplan-11th-Exp-Donor-BM-plus-Pooled-Tail-Ref	chr6	138657895	138657895	C	T	Igbp1b	c.550G>A	p.Gly184Ser	missense_variant	MODERATE	128	0	0.008423	63	26	0.429	6.01819
Aplan-11-3668-BM_vs_Aplan-11th-Exp-Donor-BM-plus-Pooled-Tail-Ref	chr7	4630278	4630278	G	C	Tmem86b	c.-6C>G		5_prime_UTR_variant	MODIFIER	113	0	0.011	30	7	0.333	5.01142
Aplan-11-3668-BM_vs_Aplan-11th-Exp-Donor-BM-plus-Pooled-Tail-Ref	chr7	4943569	4943569	C	G	Ssc5d	c.2921C>G	p.Thr974Arg	missense_variant	MODERATE	230	0	0.005111	53	10	0.22	7.59824
Aplan-11-3668-BM_vs_Aplan-11th-Exp-Donor-BM-plus-Pooled-Tail-Ref	chr7	16416887	16416887	C	G	Zc3h4	c.129C>G	p.Ser43Arg	missense_variant	MODERATE	50	0	0.024	22	8	0.366	4.57322
Aplan-11-3668-BM_vs_Aplan-11th-Exp-Donor-BM-plus-Pooled-Tail-Ref	chr7	19048871	19048871	C	G	Sympk	c.2631C>G	p.Val877Val	synonymous_variant	LOW	269	0	0.004993	79	28	0.344	6.03545
Aplan-11-3668-BM_vs_Aplan-11th-Exp-Donor-BM-plus-Pooled-Tail-Ref	chr7	19065961	19065961	G	C	Rsph6a	c.1516G>C	p.Ala506Pro	missense_variant	MODERATE	58	0	0.021	30	9	0.307	4.60135
Aplan-11-3668-BM_vs_Aplan-11th-Exp-Donor-BM-plus-Pooled-Tail-Ref	chr7	24636569	24636569	C	G	Lypd3	c.-21C>G		upstream_gene_variant	MODIFIER	125	0	0.01	30	13	0.44	6.81758
Aplan-11-3668-BM_vs_Aplan-11th-Exp-Donor-BM-plus-Pooled-Tail-Ref	chr7	24637128	24637128	C	G	Lypd3	c.89C>G	p.Ala30Gly	missense_variant	MODERATE	52	1	0.024	18	10	0.526	5.97213
Aplan-11-3668-BM_vs_Aplan-11th-Exp-Donor-BM-plus-Pooled-Tail-Ref	chr7	25355314	25355314	C	G	Megf8	c.5689C>G	p.Arg1897Gly	missense_variant	MODERATE	160	0	0.007189	47	19	0.419	6.0697
Aplan-11-3668-BM_vs_Aplan-11th-Exp-Donor-BM-plus-Pooled-Tail-Ref	chr7	29110981	29110981	C	G	Ryr1	c.827G>C	p.Arg276Pro	missense_variant	MODERATE	101	0	0.013	42	7	0.219	3.88914
Aplan-11-3668-BM_vs_Aplan-11th-Exp-Donor-BM-plus-Pooled-Tail-Ref	chr7	30251639	30251639	G	A	Wdr62	c.2043C>T	p.His681His	synonymous_variant	LOW	124	1	0.018	58	24	0.435	6.90847
Aplan-11-3668-BM_vs_Aplan-11th-Exp-Donor-BM-plus-Pooled-Tail-Ref	chr7	45157596	45157596	C	G	Pih1d1	c.158-7C>G		splice_region_variant&intron_variant	LOW	105	0	0.011	37	15	0.402	6.53194
Aplan-11-3668-BM_vs_Aplan-11th-Exp-Donor-BM-plus-Pooled-Tail-Ref	chr7	45195487	45195487	C	G	Ccdc155	c.610+42G>C		intron_variant	MODIFIER	68	0	0.018	10	6	0.538	6.08746
Aplan-11-3668-BM_vs_Aplan-11th-Exp-Donor-BM-plus-Pooled-Tail-Ref	chr7	45356327	45356327	C	G	Ppfia3	c.1144G>C	p.Val382Leu	missense_variant	MODERATE	155	0	0.007873	43	17	0.392	6.23318
Aplan-11-3668-BM_vs_Aplan-11th-Exp-Donor-BM-plus-Pooled-Tail-Ref	chr7	49632759	49632759	G	C	Dbx1	c.697C>G	p.Arg233Gly	missense_variant	MODERATE	96	0	0.012	28	6	0.224	4.07383
Aplan-11-3668-BM_vs_Aplan-11th-Exp-Donor-BM-plus-Pooled-Tail-Ref	chr7	66172009	66172009	C	G	Chsy1	c.1991C>G	p.Pro664Arg	missense_variant	MODERATE	194	0	0.00603	116	32	0.261	6.00176
Aplan-11-3668-BM_vs_Aplan-11th-Exp-Donor-BM-plus-Pooled-Tail-Ref	chr7	75610119	75610119	C	G	Akap13	c.2490C>G	p.Thr830Thr	synonymous_variant	LOW	131	0	0.008339	64	22	0.338	6.13687
Aplan-11-3668-BM_vs_Aplan-11th-Exp-Donor-BM-plus-Pooled-Tail-Ref	chr7	80082240	80082240	C	G	Zfp710	c.1164C>G	p.Arg388Arg	synonymous_variant	LOW	120	0	0.009695	33	20	0.586	6.23895
[truncated: 10,243 more rows]
