# Supplementary material for: 5-Aza-4’-thio-2’-deoxycytidine induces C&gt;G transversions in a specific trinucleotide context and leads to acute lymphoid leukemia
Source: Research Square preprint supplement (doi:10.21203/rs.3.rs-3186246/v1), 2023-12-19
Supplement: Supplementary file 2 [file 148f17d588766c7a3afef027.xlsx]

## Sheet: Data
Mouse #	Age of Mice (Months)	Vendor	Treatment	IR	# Cycles at Death	Necropsy Report	HGB	WBC	Plt	Diagnoses
8379	13.9333	Charles River	ATC	0	5	Thymoma, hepatosplenamegaly	10.8	5.04	1572	T-ALL
8382	13.9333	Charles River	ATC	0	5	Thymoma, hepatosplenamegaly	13*	6.34	1483	Unknown
8387	13.9333	Charles River	ATC	0	7	Thymoma, hepatosplenamegaly	10.7	4.94	1318	B-ALL
5155	12.2667	Charles River	ATC	0	9	Thymoma, hepatosplenamegaly	9.5*	4.38	1810	Unknown
5158	12.2667	Charles River	ATC	0	5	Thymoma, hepatosplenamegaly	13.4	14.84	1625	T-ALL
7928	10.1	Charles River	ATC	600	5	Thymoma, hepatosplenamegaly	13.1	4.04	843	T-ALL
7924	10.1	Charles River	ATC	600	4	Thymoma, hepatosplenamegaly	14.3	119.46	500	T-ALL
1708	11.0667	Charles River	ATC	600	4	Thymoma, hepatosplenamegaly	11.9	4.32	1216	T-ALL
1701	11.0667	Charles River	ATC	600	4	Thymoma, hepatosplenamegaly	10.7	22.64	235	T-ALL
7821	16.3	Charles River	ATC	600	4	Thymoma, hepatosplenamegaly	10.2	3.74	527	T-ALL
8395	12.2333	Charles River	PBS	0	Survived to Endpoint.	Survived to Endpoint.	Survived to Endpoint.	Survived to Endpoint.	Survived to Endpoint.	Survived to Endpoint.
8405	10.7667	Charles River	PBS	0	Survived to Endpoint.	Survived to Endpoint.	Survived to Endpoint.	Survived to Endpoint.	Survived to Endpoint.	Survived to Endpoint.
8406	10.7667	Charles River	PBS	0	Survived to Endpoint.	Survived to Endpoint.	Survived to Endpoint.	Survived to Endpoint.	Survived to Endpoint.	Survived to Endpoint.
5157	12.2667	Charles River	PBS	0	Survived to Endpoint.	Survived to Endpoint.	Survived to Endpoint.	Survived to Endpoint.	Survived to Endpoint.	Survived to Endpoint.
8390	13.4333	Charles River	PBS	0	3	Lung tumor	14	10.1	1503	Lung Cancer
7929	10.1	Charles River	PBS	600	Survived to Endpoint.	Survived to Endpoint.	Survived to Endpoint.	Survived to Endpoint.	Survived to Endpoint.	Survived to Endpoint.
7930	10.1	Charles River	PBS	600	Survived to Endpoint.	Survived to Endpoint.	Survived to Endpoint.	Survived to Endpoint.	Survived to Endpoint.	Survived to Endpoint.
1702	11.0667	Charles River	PBS	600	Survived to Endpoint.	Survived to Endpoint.	Survived to Endpoint.	Survived to Endpoint.	Survived to Endpoint.	Survived to Endpoint.
1707	11.0667	Charles River	PBS	600	Survived to Endpoint.	Survived to Endpoint.	Survived to Endpoint.	Survived to Endpoint.	Survived to Endpoint.	Survived to Endpoint.
7921	16.3	Charles River	PBS	600	5	Organs unremarkable. Long bones largely devoid of cells, particulate-like material extracted when flushed	12.1	10.82	1256	Myelofibrosis
3675	2	Jax	ATC	600	4	Hepatosplenamegaly	13.6*	7	1024	Unknown
3676	2	Jax	ATC	600	5	Thymoma, hepatosplenamegaly	12.9	10.88	389	ETP-ALL
3677	2	Jax	ATC	600	5	Thymoma, hepatosplenamegaly	14.7	4.16	960	T-ALL
3678	2	Jax	ATC	600	4	Thymoma, hepatosplenamegaly	12.2	5	839	T-ALL and B-ALL
3679	2	Jax	ATC	600	5	Thymoma, hepatosplenamegaly	12.9	77.74	681	T-ALL and ETP
3680	2	Jax	ATC	600	4	Thymoma, hepatosplenamegaly	12	7.88	762	T-ALL
3682	2	Jax	ATC	0	5	Thymoma, hepatosplenamegaly	14.2	20.36	928	T-ALL and ETP-ALL
3683	2	Jax	ATC	0	6	Thymoma, hepatosplenamegaly	13.9	9.32	1019	T-ALL
3684	2	Jax	ATC	0	7	Thymoma, hepatosplenamegaly	16.9	9.1	749	T-ALL
3685	2	Jax	ATC	0	5	Unremarkable	14.3*	12.34	1142	Unknown
3689	2	Jax	ATC	0	6	Thymoma, hepatosplenamegaly	14.2	8.28	981	T-ALL
3690	2	Jax	ATC	0	7	Hepatomegaly	14	11.02	932	T-ALL
3691	2	Jax	ATC	0	5	Thymoma	15.1	3.38	1046	T-ALL and ETP-ALL
3686	2	Jax	PBS	600	Survived to Endpoint.	Survived to Endpoint.	Survived to Endpoint.	Survived to Endpoint.	Survived to Endpoint.	Survived to Endpoint.
3687	2	Jax	PBS	600	Survived to Endpoint.	Survived to Endpoint.	Survived to Endpoint.	Survived to Endpoint.	Survived to Endpoint.	Survived to Endpoint.
3688	2	Jax	PBS	600	Survived to Endpoint.	Survived to Endpoint.	Survived to Endpoint.	Survived to Endpoint.	Survived to Endpoint.	Survived to Endpoint.
3692	2	Jax	PBS	600	Survived to Endpoint.	Survived to Endpoint.	Survived to Endpoint.	Survived to Endpoint.	Survived to Endpoint.	Survived to Endpoint.
3693	2	Jax	PBS	600	Survived to Endpoint.	Survived to Endpoint.	Survived to Endpoint.	Survived to Endpoint.	Survived to Endpoint.	Survived to Endpoint.
3694	2	Jax	PBS	600	Survived to Endpoint.	Survived to Endpoint.	Survived to Endpoint.	Survived to Endpoint.	Survived to Endpoint.	Survived to Endpoint.
3635	8	Charles River	ATC	600	3	Thymoma	11	3.84	784	T-ALL
3636	8	Charles River	ATC	600	4	Thymoma, hepatosplenamegaly	11.3	16.06	912	T-ALL
3637	8	Charles River	ATC	600	3	Thymoma	12.1	7.02	775	T-ALL and B-ALL
3638	8	Charles River	ATC	600	4	Thymoma, hepatosplenamegaly	11.7	7.8	745	T-ALL
3639	8	Charles River	ATC	600	4	Thymoma	11.5	6.12	723	T-ALL
3640	8	Charles River	ATC	0	6	Hepatosplenamegaly	11.6*	6.24	1052	Unknown
3641	8	Charles River	ATC	0	3	Thymoma, hepatosplenamegaly	13.8*	8.8	918	Unknown
3642	8	Charles River	ATC	0	5	Thymoma, hepatosplenamegaly	13.6	12.18	1105	ETP-ALL
3643	8	Charles River	ATC	0	3	Hepatosplenamegaly	9.5*	12.48	442	Unknown
3644	8	Charles River	ATC	0	4	Thymoma, hepatosplenamegaly	9.4	26.32	219	B-ALL
3645	8	Charles River	PBS	0	Survived to Endpoint.	Survived to Endpoint.	Survived to Endpoint.	Survived to Endpoint.	Survived to Endpoint.	Survived to Endpoint.
3646	8	Charles River	PBS	0	Survived to Endpoint.	Survived to Endpoint.	Survived to Endpoint.	Survived to Endpoint.	Survived to Endpoint.	Survived to Endpoint.
3647	8	Charles River	PBS	0	Survived to Endpoint.	Survived to Endpoint.	Survived to Endpoint.	Survived to Endpoint.	Survived to Endpoint.	Survived to Endpoint.
3648	8	Charles River	PBS	0	Survived to Endpoint.	Survived to Endpoint.	Survived to Endpoint.	Survived to Endpoint.	Survived to Endpoint.	Survived to Endpoint.
3649	8	Charles River	PBS	0	Survived to Endpoint.	Survived to Endpoint.	Survived to Endpoint.	Survived to Endpoint.	Survived to Endpoint.	Survived to Endpoint.
AML = Acute Myeloid Leukemia, T-ALL = T cell acute lymphoblastic leukemia, B-ALL = B cell acute lymphoblastic leukemia, ETP = Early thymic progenitor acute lymphoblastic leukemia, MDS= Myelodysplastic Syndrome
* Mouse found dead, value reflects most recent CBC prior to death
All ATC mice received 1.0 mg/kg in these experiments
