# Supplementary material for: 5-Aza-4’-thio-2’-deoxycytidine induces C&gt;G transversions in a specific trinucleotide context and leads to acute lymphoid leukemia
Source: Research Square preprint supplement (doi:10.21203/rs.3.rs-3186246/v1), 2023-12-19
Supplement: Supplementary file 3 [file 24b4295b4e9aacec384eac35.xlsx]

## Sheet: Sheet2
SampleName	Chr	Start	End	REF	ALT	Gene_Name	HGVS.c	HGVS.p	Annotation	Annotation_Impact	DP_NORMAL	AD_NORMAL.2	AF_NORMAL	DP_TUMOR	AD_TUMOR.2	AF_TUMOR	LOG_FISHER
Aplan-10C-3676-Thy_vs_Aplan-10C-3676-Tail	chr1	10082335	10082335	G	C	Cspp1	c.1122G>C	p.Lys374Asn	missense_variant	MODERATE	53	0	0.024	31	11	0.333	5.34117
Aplan-10C-3676-Thy_vs_Aplan-10C-3676-Tail	chr1	10140542	10140542	G	A	Arfgef1	c.5301C>T	p.Ser1767Ser	synonymous_variant	LOW	47	0	0.024	41	15	0.371	5.69917
Aplan-10C-3676-Thy_vs_Aplan-10C-3676-Tail	chr1	16389924	16389924	C	G	Stau2	c.788G>C	p.Arg263Pro	missense_variant	MODERATE	51	0	0.023	52	15	0.343	4.72616
Aplan-10C-3676-Thy_vs_Aplan-10C-3676-Tail	chr1	20200630	20200630	C	T	Pkhd1	c.9698G>A	p.Arg3233Gln	missense_variant	MODERATE	60	0	0.017	45	10	0.2	3.95631
Aplan-10C-3676-Thy_vs_Aplan-10C-3676-Tail	chr1	20520266	20520266	G	C	Pkhd1	c.5256C>G	p.Leu1752Leu	synonymous_variant	LOW	45	0	0.028	34	9	0.277	3.59371
Aplan-10C-3676-Thy_vs_Aplan-10C-3676-Tail	chr1	23844930	23844930	G	C	B3gat2	c.797G>C	p.Arg266Pro	missense_variant	MODERATE	123	0	0.009994	95	20	0.224	6.23597
Aplan-10C-3676-Thy_vs_Aplan-10C-3676-Tail	chr1	34806403	34806403	G	C	Arhgef4	c.395G>C	p.Arg132Pro	missense_variant	MODERATE	33	0	0.032	21	11	0.474	5.43359
Aplan-10C-3676-Thy_vs_Aplan-10C-3676-Tail	chr1	36269501	36269501	G	C	Neurl3	c.229C>G	p.Arg77Gly	missense_variant	MODERATE	20	0	0.047	15	8	0.529	3.56318
Aplan-10C-3676-Thy_vs_Aplan-10C-3676-Tail	chr1	36412576	36412576	G	C	Fer1l5	c.3764G>C	p.Arg1255Pro	missense_variant	MODERATE	28	0	0.035	36	15	0.441	4.35465
Aplan-10C-3676-Thy_vs_Aplan-10C-3676-Tail	chr1	36506448	36506448	C	G	Cnnm4	c.2158C>G	p.Arg720Gly	missense_variant	MODERATE	32	0	0.037	26	14	0.5	6.02129
Aplan-10C-3676-Thy_vs_Aplan-10C-3676-Tail	chr1	37244918	37244918	C	G	Cnga3	c.301C>G	p.Arg101Gly	missense_variant	MODERATE	54	0	0.023	30	11	0.357	5.5315
Aplan-10C-3676-Thy_vs_Aplan-10C-3676-Tail	chr1	37875336	37875336	G	C	Lipt1	c.472G>C	p.Gly158Arg	missense_variant	MODERATE	87	0	0.013	88	30	0.338	5.90226
Aplan-10C-3676-Thy_vs_Aplan-10C-3676-Tail	chr1	39695943	39695943	G	C	Rfx8	c.357C>G	p.Phe119Leu	missense_variant	MODERATE	68	0	0.018	54	18	0.322	7.18896
Aplan-10C-3676-Thy_vs_Aplan-10C-3676-Tail	chr1	40300782	40300782	C	G	Il1r1	c.753C>G	p.Cys251Trp	missense_variant	MODERATE	122	0	0.009734	92	24	0.284	6.17422
Aplan-10C-3676-Thy_vs_Aplan-10C-3676-Tail	chr1	40602952	40602952	C	G	Slc9a4	c.1080C>G	p.Ser360Arg	missense_variant	MODERATE	56	0	0.023	47	8	0.21	2.87858
Aplan-10C-3676-Thy_vs_Aplan-10C-3676-Tail	chr1	43533717	43533717	C	G	Nck2	c.150C>G	p.Tyr50*	stop_gained	HIGH	33	0	0.033	27	8	0.32	3.06164
Aplan-10C-3676-Thy_vs_Aplan-10C-3676-Tail	chr1	52799420	52799420	C	G	Inpp1	c.69G>C	p.Arg23Ser	missense_variant	MODERATE	52	0	0.021	39	14	0.402	5.85012
Aplan-10C-3676-Thy_vs_Aplan-10C-3676-Tail	chr1	53584631	53584631	G	C	Dnah7a	c.3099C>G	p.Val1033Val	synonymous_variant	LOW	115	0	0.011	120	41	0.356	5.79551
Aplan-10C-3676-Thy_vs_Aplan-10C-3676-Tail	chr1	55052897	55052897	G	C	Coq10b	c.23G>C	p.Ser8Thr	missense_variant	MODERATE	29	0	0.039	18	10	0.556	5.07311
Aplan-10C-3676-Thy_vs_Aplan-10C-3676-Tail	chr1	58228892	58228892	G	C	Aox4	c.630G>C	p.Pro210Pro	synonymous_variant	LOW	161	0	0.007524	104	27	0.256	6.05335
Aplan-10C-3676-Thy_vs_Aplan-10C-3676-Tail	chr1	58305380	58305380	C	G	Aox2	c.1631C>G	p.Pro544Arg	missense_variant	MODERATE	16	1	0.093	15	2	0.214	0.222171
Aplan-10C-3676-Thy_vs_Aplan-10C-3676-Tail	chr1	58529764	58529764	C	G	Fam126b	c.1655G>C	p.Arg552Pro	missense_variant	MODERATE	134	0	0.008135	131	52	0.386	6.02814
Aplan-10C-3676-Thy_vs_Aplan-10C-3676-Tail	chr1	58993062	58993062	C	G	Stradb	c.995C>G	p.Thr332Arg	missense_variant	MODERATE	86	2	0.026	69	22	0.323	6.41575
Aplan-10C-3676-Thy_vs_Aplan-10C-3676-Tail	chr1	59109162	59109162	C	G	Tmem237	c.454G>C	p.Glu152Gln	missense_variant	MODERATE	46	0	0.025	44	13	0.317	4.50044
Aplan-10C-3676-Thy_vs_Aplan-10C-3676-Tail	chr1	60493597	60493597	C	G	Raph1	c.1720G>C	p.Val574Leu	missense_variant	MODERATE	58	0	0.019	38	9	0.235	3.90057
Aplan-10C-3676-Thy_vs_Aplan-10C-3676-Tail	chr1	60913265	60913265	C	G	Ctla4	c.504C>G	p.Val168Val	synonymous_variant	LOW	115	0	0.011	86	17	0.207	6.7011
Aplan-10C-3676-Thy_vs_Aplan-10C-3676-Tail	chr1	62738281	62738281	C	G	Nrp2	c.252-8C>G		splice_region_variant&intron_variant	LOW	21	0	0.045	23	7	0.366	2.0254
Aplan-10C-3676-Thy_vs_Aplan-10C-3676-Tail	chr1	66627220	66627220	C	G	Unc80	c.5566C>G	p.Arg1856Gly	missense_variant	MODERATE	86	0	0.015	61	28	0.465	5.94701
Aplan-10C-3676-Thy_vs_Aplan-10C-3676-Tail	chr1	71307110	71307110	G	C	Abca12	c.2600C>G	p.Pro867Arg	missense_variant	MODERATE	15	0	0.071	5	4	0.671	2.98632
Aplan-10C-3676-Thy_vs_Aplan-10C-3676-Tail	chr1	74003519	74003519	C	G	Tns1	c.391G>C	p.Val131Leu	missense_variant&splice_region_variant	MODERATE	12	0	0.081	15	4	0.308	0.974764
Aplan-10C-3676-Thy_vs_Aplan-10C-3676-Tail	chr1	74605457	74605457	C	G	Stk36	c.372C>G	p.Arg124Arg	synonymous_variant	LOW	96	0	0.013	68	26	0.394	6.55672
Aplan-10C-3676-Thy_vs_Aplan-10C-3676-Tail	chr1	74924991	74924991	A	G	Ccdc108	c.1797T>C	p.Pro599Pro	synonymous_variant	LOW	49	0	0.021	37	10	0.286	4.00712
Aplan-10C-3676-Thy_vs_Aplan-10C-3676-Tail	chr1	80543181	80543181	C	G	Dock10	c.3621G>C	p.Pro1207Pro	synonymous_variant	LOW	87	0	0.013	91	34	0.385	6.09898
Aplan-10C-3676-Thy_vs_Aplan-10C-3676-Tail	chr1	81087402	81087402	C	A	Nyap2	c.130C>A	p.Arg44Ser	missense_variant	MODERATE	100	0	0.012	58	25	0.447	6.75688
Aplan-10C-3676-Thy_vs_Aplan-10C-3676-Tail	chr1	87088494	87088494	C	G	Alppl2	c.646-4G>C		splice_region_variant&intron_variant	LOW	22	0	0.047	21	7	0.333	2.44268
Aplan-10C-3676-Thy_vs_Aplan-10C-3676-Tail	chr1	87089091	87089091	C	G	Alppl2	c.331G>C	p.Ala111Pro	missense_variant	MODERATE	72	0	0.015	62	18	0.308	6.6956
Aplan-10C-3676-Thy_vs_Aplan-10C-3676-Tail	chr1	88360656	88360656	C	G	Trpm8	c.2519C>G	p.Thr840Arg	missense_variant	MODERATE	52	0	0.025	40	15	0.379	6.21185
Aplan-10C-3676-Thy_vs_Aplan-10C-3676-Tail	chr1	90945637	90945637	C	G	Mlph	c.1669C>G	p.Arg557Gly	missense_variant	MODERATE	74	0	0.018	95	28	0.338	5.91265
Aplan-10C-3676-Thy_vs_Aplan-10C-3676-Tail	chr1	94041412	94041412	C	G	Pdcd1	c.180G>C	p.Ser60Ser	synonymous_variant	LOW	82	0	0.014	46	17	0.402	6.8695
Aplan-10C-3676-Thy_vs_Aplan-10C-3676-Tail	chr1	96841226	96841226	G	C	Slco4c1	c.910C>G	p.Arg304Gly	missense_variant	MODERATE	52	0	0.021	62	14	0.231	4.0058
Aplan-10C-3676-Thy_vs_Aplan-10C-3676-Tail	chr1	106281406	106281406	C	G	Phlpp1	c.1488C>G	p.Ser496Ser	synonymous_variant	LOW	34	0	0.031	31	6	0.259	2.04993
Aplan-10C-3676-Thy_vs_Aplan-10C-3676-Tail	chr1	118581452	118581452	G	C	Clasp1	c.4108G>C	p.Gly1370Arg	missense_variant	MODERATE	26	0	0.043	28	7	0.231	1.98297
Aplan-10C-3676-Thy_vs_Aplan-10C-3676-Tail	chr1	126027930	126027930	G	C	Nckap5	c.1088C>G	p.Pro363Arg	missense_variant	MODERATE	101	0	0.011	87	37	0.417	6.15602
Aplan-10C-3676-Thy_vs_Aplan-10C-3676-Tail	chr1	127934511	127934511	G	C	Rab3gap1	c.2018G>C	p.Arg673Pro	missense_variant	MODERATE	45	0	0.026	40	12	0.333	4.37198
Aplan-10C-3676-Thy_vs_Aplan-10C-3676-Tail	chr1	128231404	128231404	C	G	R3hdm1	c.2815C>G	p.Arg939Gly	missense_variant	MODERATE	56	0	0.021	38	11	0.333	4.75873
Aplan-10C-3676-Thy_vs_Aplan-10C-3676-Tail	chr1	128300193	128300193	G	C	Lct	c.3562C>G	p.Arg1188Gly	missense_variant	MODERATE	92	0	0.013	78	26	0.329	6.18478
Aplan-10C-3676-Thy_vs_Aplan-10C-3676-Tail	chr1	128300410	128300410	G	C	Lct	c.3345C>G	p.Tyr1115*	stop_gained	HIGH	79	0	0.014	60	19	0.367	6.19673
Aplan-10C-3676-Thy_vs_Aplan-10C-3676-Tail	chr1	128300802	128300802	G	C	Lct	c.2953C>G	p.Arg985Gly	missense_variant	MODERATE	66	0	0.017	71	23	0.304	6.67984
Aplan-10C-3676-Thy_vs_Aplan-10C-3676-Tail	chr1	128301213	128301213	C	G	Lct	c.2542G>C	p.Gly848Arg	missense_variant	MODERATE	85	0	0.013	59	22	0.37	6.68086
Aplan-10C-3676-Thy_vs_Aplan-10C-3676-Tail	chr1	128307609	128307609	C	G	Lct	c.1660G>C	p.Gly554Arg	missense_variant	MODERATE	30	0	0.042	33	10	0.303	3.01804
Aplan-10C-3676-Thy_vs_Aplan-10C-3676-Tail	chr1	128307945	128307945	C	G	Lct	c.1324G>C	p.Val442Leu	missense_variant	MODERATE	31	0	0.036	28	7	0.322	2.45958
Aplan-10C-3676-Thy_vs_Aplan-10C-3676-Tail	chr1	128589650	128589650	G	C	Cxcr4	c.273C>G	p.Ile91Met	missense_variant	MODERATE	78	0	0.013	61	14	0.232	5.41537
Aplan-10C-3676-Thy_vs_Aplan-10C-3676-Tail	chr1	130456842	130456842	C	G	Cd55	c.643G>C	p.Asp215His	missense_variant	MODERATE	115	0	0.011	135	39	0.292	6.0295
Aplan-10C-3676-Thy_vs_Aplan-10C-3676-Tail	chr1	130577064	130577064	C	G	Zp3r	c.1595G>C	p.Ser532Thr	missense_variant	MODERATE	44	0	0.029	60	23	0.425	5.89588
Aplan-10C-3676-Thy_vs_Aplan-10C-3676-Tail	chr1	130577078	130577078	C	G	Zp3r	c.1581G>C	p.Leu527Phe	missense_variant	MODERATE	44	0	0.028	49	15	0.357	4.63614
Aplan-10C-3676-Thy_vs_Aplan-10C-3676-Tail	chr1	131021477	131021477	G	C	Il10	c.374G>C	p.Arg125Pro	missense_variant	MODERATE	38	0	0.032	35	9	0.281	3.13829
Aplan-10C-3676-Thy_vs_Aplan-10C-3676-Tail	chr1	131153383	131153383	C	G	Eif2d	c.14C>G	p.Ala5Gly	missense_variant	MODERATE	62	0	0.018	65	26	0.426	5.89713
Aplan-10C-3676-Thy_vs_Aplan-10C-3676-Tail	chr1	132114967	132114967	C	G	Cdk18	c.1325G>C	p.Arg442Pro	missense_variant	MODERATE	24	0	0.041	26	9	0.318	2.75228
Aplan-10C-3676-Thy_vs_Aplan-10C-3676-Tail	chr1	133272454	133272454	C	G	Plekha6	c.770C>G	p.Pro257Arg	missense_variant	MODERATE	33	0	0.031	16	5	0.352	2.64004
Aplan-10C-3676-Thy_vs_Aplan-10C-3676-Tail	chr1	133292426	133292426	G	C	Plekha6	c.2856G>C	p.Arg952Arg	synonymous_variant	LOW	29	0	0.045	13	4	0.417	2.19464
Aplan-10C-3676-Thy_vs_Aplan-10C-3676-Tail	chr1	134200122	134200122	G	C	Mybph	c.1421G>C	p.Arg474Pro	missense_variant	MODERATE	41	0	0.025	34	7	0.235	2.56697
Aplan-10C-3676-Thy_vs_Aplan-10C-3676-Tail	chr1	134837901	134837901	C	G	Ppp1r12b	c.2079G>C	p.Ser693Ser	synonymous_variant	LOW	34	0	0.032	26	8	0.339	3.21425
Aplan-10C-3676-Thy_vs_Aplan-10C-3676-Tail	chr1	135152823	135152823	C	G	Arl8a	c.235C>G	p.Arg79Gly	missense_variant	MODERATE	81	0	0.016	58	17	0.25	7.1417
Aplan-10C-3676-Thy_vs_Aplan-10C-3676-Tail	chr1	135254273	135254273	C	G	Elf3	c.1169G>C	p.Arg390Pro	missense_variant	MODERATE	100	0	0.012	99	32	0.346	6.43899
Aplan-10C-3676-Thy_vs_Aplan-10C-3676-Tail	chr1	136144623	136144623	G	C	Kif21b	c.66G>C	p.Glu22Asp	missense_variant	MODERATE	28	0	0.041	10	4	0.405	2.54593
Aplan-10C-3676-Thy_vs_Aplan-10C-3676-Tail	chr1	136151288	136151288	G	C	Kif21b	c.1373G>C	p.Ser458Thr	missense_variant	MODERATE	39	0	0.029	27	6	0.208	2.48706
Aplan-10C-3676-Thy_vs_Aplan-10C-3676-Tail	chr1	136152111	136152111	G	C	Kif21b	c.1469+5G>C		splice_region_variant&intron_variant	LOW	41	0	0.029	33	12	0.381	4.79131
Aplan-10C-3676-Thy_vs_Aplan-10C-3676-Tail	chr1	136156290	136156290	G	C	Kif21b	c.2274G>C	p.Lys758Asn	missense_variant	MODERATE	44	0	0.029	32	9	0.31	3.7058
Aplan-10C-3676-Thy_vs_Aplan-10C-3676-Tail	chr1	152830388	152830388	C	G	Ncf2	c.750C>G	p.Gly250Gly	synonymous_variant	LOW	72	0	0.016	51	17	0.355	7.30467
Aplan-10C-3676-Thy_vs_Aplan-10C-3676-Tail	chr1	153149060	153149060	C	G	Lamc2	c.821G>C	p.Arg274Pro	missense_variant	MODERATE	54	0	0.023	29	12	0.444	6.27097
Aplan-10C-3676-Thy_vs_Aplan-10C-3676-Tail	chr1	154483545	154483545	G	C	Cacna1e	c.1726C>G	p.Arg576Gly	missense_variant	MODERATE	38	0	0.03	25	12	0.5	5.71023
Aplan-10C-3676-Thy_vs_Aplan-10C-3676-Tail	chr1	155332256	155332256	G	C	Xpr1	c.354C>G	p.Ser118Ser	synonymous_variant	LOW	74	1	0.016	78	28	0.379	6.2235
Aplan-10C-3676-Thy_vs_Aplan-10C-3676-Tail	chr1	156432879	156432879	G	C	Soat1	c.1388C>G	p.Pro463Arg	missense_variant	MODERATE	21	0	0.049	24	10	0.421	3.13946
Aplan-10C-3676-Thy_vs_Aplan-10C-3676-Tail	chr1	156441252	156441252	G	C	Soat1	c.727C>G	p.Arg243Gly	missense_variant	MODERATE	61	2	0.04	49	18	0.381	5.18711
Aplan-10C-3676-Thy_vs_Aplan-10C-3676-Tail	chr1	156845029	156845029	C	G	Angptl1	c.424C>G	p.Arg142Gly	missense_variant	MODERATE	84	0	0.013	48	11	0.232	5.18519
Aplan-10C-3676-Thy_vs_Aplan-10C-3676-Tail	chr1	160993517	160993517	G	C	Serpinc1	c.533G>C	p.Arg178Pro	missense_variant	MODERATE	96	0	0.013	80	31	0.375	6.27627
Aplan-10C-3676-Thy_vs_Aplan-10C-3676-Tail	chr1	161020253	161020253	G	C	Zbtb37	c.1183C>G	p.Arg395Gly	missense_variant	MODERATE	82	0	0.015	76	20	0.286	6.1786
Aplan-10C-3676-Thy_vs_Aplan-10C-3676-Tail	chr1	162313614	162313614	C	G	Dnm3	c.1075G>C	p.Gly359Arg	missense_variant	MODERATE	57	0	0.02	38	15	0.412	6.85335
Aplan-10C-3676-Thy_vs_Aplan-10C-3676-Tail	chr1	162320989	162320989	C	G	Dnm3	c.812G>C	p.Arg271Pro	missense_variant	MODERATE	56	0	0.02	41	11	0.256	4.49807
Aplan-10C-3676-Thy_vs_Aplan-10C-3676-Tail	chr1	164126484	164126484	G	C	Selp	c.352G>C	p.Ala118Pro	missense_variant	MODERATE	53	0	0.021	35	12	0.338	5.39114
Aplan-10C-3676-Thy_vs_Aplan-10C-3676-Tail	chr1	164128348	164128348	G	C	Selp	c.775G>C	p.Ala259Pro	missense_variant&splice_region_variant	MODERATE	68	0	0.018	50	17	0.333	7.15195
Aplan-10C-3676-Thy_vs_Aplan-10C-3676-Tail	chr1	164192733	164192733	C	G	F5	c.2776C>G	p.Arg926Gly	missense_variant	MODERATE	118	0	0.01	90	25	0.295	6.53418
Aplan-10C-3676-Thy_vs_Aplan-10C-3676-Tail	chr1	164345345	164345345	C	G	Nme7	c.624C>G	p.Pro208Pro	synonymous_variant	LOW	62	0	0.02	77	28	0.351	6.02057
Aplan-10C-3676-Thy_vs_Aplan-10C-3676-Tail	chr1	165551264	165551264	G	C	Adcy10	c.2621G>C	p.Arg874Pro	missense_variant	MODERATE	27	0	0.037	24	8	0.375	2.93741
Aplan-10C-3676-Thy_vs_Aplan-10C-3676-Tail	chr1	170799726	170799726	G	C	Atf6	c.1168C>G	p.Arg390Gly	missense_variant	MODERATE	75	0	0.015	58	17	0.274	6.79505
Aplan-10C-3676-Thy_vs_Aplan-10C-3676-Tail	chr1	170966646	170966646	G	C	Fcgr2b	c.434C>G	p.Thr145Arg	missense_variant	MODERATE	132	1	0.018	108	41	0.37	6.05742
Aplan-10C-3676-Thy_vs_Aplan-10C-3676-Tail	chr1	174214134	174214134	G	C	Spta1	c.4069G>C	p.Gly1357Arg	missense_variant	MODERATE	62	0	0.019	64	22	0.358	6.19995
Aplan-10C-3676-Thy_vs_Aplan-10C-3676-Tail	chr1	179043762	179043762	C	G	Smyd3	c.1051G>C	p.Ala351Pro	missense_variant	MODERATE	26	0	0.038	16	9	0.506	4.5908
Aplan-10C-3676-Thy_vs_Aplan-10C-3676-Tail	chr1	179606441	179606441	C	G	Cnst	c.821C>G	p.Ala274Gly	missense_variant	MODERATE	71	0	0.016	56	15	0.255	5.85605
Aplan-10C-3676-Thy_vs_Aplan-10C-3676-Tail	chr1	180893220	180893220	C	G	Lefty2	c.37C>G	p.Leu13Val	missense_variant	MODERATE	30	0	0.034	27	9	0.353	3.28319
Aplan-10C-3676-Thy_vs_Aplan-10C-3676-Tail	chr1	184912482	184912482	C	G	Mark1	c.1276G>C	p.Ala426Pro	missense_variant&splice_region_variant	MODERATE	26	0	0.041	15	3	0.266	1.36975
Aplan-10C-3676-Thy_vs_Aplan-10C-3676-Tail	chr1	185247870	185247870	C	G	Rab3gap2	c.984C>G	p.His328Gln	missense_variant	MODERATE	60	0	0.019	61	24	0.34	6.55549
Aplan-10C-3676-Thy_vs_Aplan-10C-3676-Tail	chr1	188759843	188759843	C	G	Ush2a	c.9328C>G	p.Arg3110Gly	missense_variant	MODERATE	42	0	0.029	34	18	0.486	6.09698
Aplan-10C-3676-Thy_vs_Aplan-10C-3676-Tail	chr1	195159467	195159467	G	C	Cr2	c.1177C>G	p.Arg393Gly	missense_variant	MODERATE	56	0	0.022	61	21	0.357	6.10558
Aplan-10C-3676-Thy_vs_Aplan-10C-3676-Tail	chr2	18186297	18186297	C	G	Mllt10	c.1779C>G	p.Ser593Arg	missense_variant	MODERATE	70	0	0.019	62	12	0.217	4.20832
Aplan-10C-3676-Thy_vs_Aplan-10C-3676-Tail	chr2	20880375	20880375	C	G	Arhgap21	c.2020G>C	p.Glu674Gln	missense_variant	MODERATE	109	0	0.011	70	26	0.367	5.98594
Aplan-10C-3676-Thy_vs_Aplan-10C-3676-Tail	chr2	25425302	25425302	C	G	Fut7	c.571C>G	p.Arg191Gly	missense_variant	MODERATE	61	0	0.019	37	7	0.236	3.12831
Aplan-10C-3676-Thy_vs_Aplan-10C-3676-Tail	chr2	25612136	25612136	C	G	Ccdc183	c.725G>C	p.Arg242Pro	missense_variant	MODERATE	70	0	0.018	54	29	0.469	6.71188
Aplan-10C-3676-Thy_vs_Aplan-10C-3676-Tail	chr2	26060210	26060210	C	G	Nacc2	c.1513G>C	p.Val505Leu	missense_variant	MODERATE	38	0	0.029	32	12	0.4	4.67319
Aplan-10C-3676-Thy_vs_Aplan-10C-3676-Tail	chr2	26357797	26357797	C	G	Card9	c.541G>C	p.Glu181Gln	missense_variant	MODERATE	46	0	0.025	28	10	0.307	4.73833
Aplan-10C-3676-Thy_vs_Aplan-10C-3676-Tail	chr2	26367793	26367793	C	G	Snapc4	c.2252G>C	p.Arg751Pro	missense_variant	MODERATE	32	0	0.031	35	14	0.402	4.5448
Aplan-10C-3676-Thy_vs_Aplan-10C-3676-Tail	chr2	26430240	26430240	G	C	Sec16a	c.4185C>G	p.Tyr1395*	stop_gained	HIGH	25	0	0.041	32	9	0.296	2.47562
Aplan-10C-3676-Thy_vs_Aplan-10C-3676-Tail	chr2	26465090	26465090	G	C	Notch1	c.5415C>G	p.Asp1805Glu	missense_variant	MODERATE	60	0	0.02	52	10	0.217	3.55356
Aplan-10C-3676-Thy_vs_Aplan-10C-3676-Tail	chr2	26480277	26480277	G	C	Notch1	c.1202C>G	p.Pro401Arg	missense_variant	MODERATE	49	0	0.027	16	2	0.213	1.23888
Aplan-10C-3676-Thy_vs_Aplan-10C-3676-Tail	chr2	26991377	26991377	C	G	Adamts13	c.2365C>G	p.Arg789Gly	missense_variant	MODERATE	28	0	0.043	21	4	0.222	1.54902
Aplan-10C-3676-Thy_vs_Aplan-10C-3676-Tail	chr2	28076763	28076763	C	G	Fcnb	c.757G>C	p.Gly253Arg	missense_variant	MODERATE	63	0	0.018	39	9	0.272	4.03375
Aplan-10C-3676-Thy_vs_Aplan-10C-3676-Tail	chr2	29810935	29810935	C	G	Slc27a4	c.952C>G	p.Arg318Gly	missense_variant	MODERATE	60	0	0.021	26	15	0.565	6.05947
Aplan-10C-3676-Thy_vs_Aplan-10C-3676-Tail	chr2	29893490	29893490	G	A	Odf2	c.155G>A	p.Arg52Gln	missense_variant	MODERATE	27	0	0.045	35	6	0.208	1.50558
Aplan-10C-3676-Thy_vs_Aplan-10C-3676-Tail	chr2	30032865	30032865	G	C	Wdr34	c.869C>G	p.Ala290Gly	missense_variant	MODERATE	10	0	0.083	20	4	0.249	0.565382
Aplan-10C-3676-Thy_vs_Aplan-10C-3676-Tail	chr2	30354921	30354921	G	C	Sh3glb2	c.266C>G	p.Thr89Ser	missense_variant	MODERATE	21	0	0.052	10	5	0.5	2.82882
Aplan-10C-3676-Thy_vs_Aplan-10C-3676-Tail	chr2	32633649	32633649	C	G	Ak1	c.573C>G	p.Ala191Ala	synonymous_variant	LOW	107	0	0.011	65	25	0.359	6.37132
Aplan-10C-3676-Thy_vs_Aplan-10C-3676-Tail	chr2	32929600	32929600	G	C	Lrsam1	c.1804C>G	p.Arg602Gly	missense_variant	MODERATE	32	0	0.035	20	4	0.211	1.74723
Aplan-10C-3676-Thy_vs_Aplan-10C-3676-Tail	chr2	35298891	35298891	C	G	Gsn	c.1435C>G	p.Arg479Gly	missense_variant	MODERATE	24	0	0.041	13	4	0.288	1.96553
Aplan-10C-3676-Thy_vs_Aplan-10C-3676-Tail	chr2	35715463	35715463	C	G	Dab2ip	c.1655C>G	p.Thr552Arg	missense_variant	MODERATE	29	0	0.038	17	4	0.263	1.8361
Aplan-10C-3676-Thy_vs_Aplan-10C-3676-Tail	chr2	52243938	52243938	G	C	Neb	c.10032C>G	p.Ser3344Arg	missense_variant	MODERATE	234	0	0.005461	184	66	0.368	5.82204
Aplan-10C-3676-Thy_vs_Aplan-10C-3676-Tail	chr2	62532980	62532980	C	G	Fap	c.1205G>C	p.Arg402Pro	missense_variant	MODERATE	118	0	0.009101	105	39	0.386	5.70571
Aplan-10C-3676-Thy_vs_Aplan-10C-3676-Tail	chr2	65497478	65497478	G	C	Scn3a	c.2667C>G	p.Arg889Arg	synonymous_variant	LOW	120	0	0.01	77	25	0.366	6.99787
Aplan-10C-3676-Thy_vs_Aplan-10C-3676-Tail	chr2	76742349	76742349	C	G	Ttn	c.72961G>C	p.Gly24321Arg	missense_variant	MODERATE	112	2	0.02	93	27	0.296	6.61235
Aplan-10C-3676-Thy_vs_Aplan-10C-3676-Tail	chr2	76749094	76749094	G	C	Ttn	c.66216C>G	p.Asn22072Lys	missense_variant	MODERATE	70	0	0.015	52	18	0.34	5.97706
Aplan-10C-3676-Thy_vs_Aplan-10C-3676-Tail	chr2	76761323	76761323	G	C	Ttn	c.57763C>G	p.Arg19255Gly	missense_variant	MODERATE	57	0	0.022	47	12	0.25	4.5196
Aplan-10C-3676-Thy_vs_Aplan-10C-3676-Tail	chr2	76807109	76807109	G	C	Ttn	c.36801C>G	p.Ile12267Met	missense_variant	MODERATE	54	0	0.022	36	8	0.281	3.40851
Aplan-10C-3676-Thy_vs_Aplan-10C-3676-Tail	chr2	90687328	90687328	C	G	Nup160	c.681C>G	p.Ser227Ser	synonymous_variant	LOW	61	0	0.021	63	22	0.359	6.21888
Aplan-10C-3676-Thy_vs_Aplan-10C-3676-Tail	chr2	90752964	90752964	C	G	Fnbp4	c.933C>G	p.Pro311Pro	splice_region_variant&synonymous_variant	LOW	88	0	0.013	99	34	0.322	6.14232
Aplan-10C-3676-Thy_vs_Aplan-10C-3676-Tail	chr2	91063072	91063072	G	C	Slc39a13	c.1041C>G	p.Asp347Glu	missense_variant	MODERATE	95	0	0.011	71	26	0.397	6.48639
Aplan-10C-3676-Thy_vs_Aplan-10C-3676-Tail	chr2	91131691	91131691	C	G	Mybpc3	c.2538C>G	p.Tyr846*	stop_gained	HIGH	37	0	0.03	34	12	0.367	4.36824
Aplan-10C-3676-Thy_vs_Aplan-10C-3676-Tail	chr2	91810186	91810186	C	G	Ambra1	c.2319C>G	p.Thr773Thr	synonymous_variant	LOW	62	0	0.017	72	29	0.4	5.90635
Aplan-10C-3676-Thy_vs_Aplan-10C-3676-Tail	chr2	91911481	91911481	C	G	Ambra1	c.3280C>G	p.Arg1094Gly	missense_variant	MODERATE	47	0	0.026	29	10	0.304	4.67811
Aplan-10C-3676-Thy_vs_Aplan-10C-3676-Tail	chr2	112250116	112250116	C	G	Nutm1	c.1453G>C	p.Gly485Arg	missense_variant	MODERATE	65	0	0.017	37	7	0.218	3.25375
Aplan-10C-3676-Thy_vs_Aplan-10C-3676-Tail	chr2	112354282	112354282	G	C	Slc12a6	c.2545G>C	p.Gly849Arg	missense_variant	MODERATE	36	0	0.032	20	5	0.285	2.3916
Aplan-10C-3676-Thy_vs_Aplan-10C-3676-Tail	chr2	113749965	113749965	G	C	Grem1	c.190C>G	p.Arg64Gly	missense_variant	MODERATE	27	0	0.042	21	9	0.455	3.75632
Aplan-10C-3676-Thy_vs_Aplan-10C-3676-Tail	chr2	113750148	113750148	G	C	Grem1	c.7C>G	p.Arg3Gly	missense_variant	MODERATE	22	0	0.051	12	5	0.418	2.54572
Aplan-10C-3676-Thy_vs_Aplan-10C-3676-Tail	chr2	118113391	118113391	C	G	Thbs1	c.489C>G	p.Asp163Glu	missense_variant	MODERATE	49	0	0.023	42	11	0.244	4.04359
Aplan-10C-3676-Thy_vs_Aplan-10C-3676-Tail	chr2	120862798	120862800	GAA	G	Ubr1	c.5133-9_5133-8delTT		splice_region_variant&intron_variant	LOW	27	0	0.037	25	4	0.212	1.33044
Aplan-10C-3676-Thy_vs_Aplan-10C-3676-Tail	chr2	121429528	121429528	C	G	Pdia3	c.547C>G	p.Arg183Gly	missense_variant	MODERATE	127	0	0.01	106	40	0.365	6.44066
Aplan-10C-3676-Thy_vs_Aplan-10C-3676-Tail	chr2	127538798	127538798	C	G	Prom2	c.842G>C	p.Arg281Pro	missense_variant	MODERATE	32	0	0.036	18	4	0.235	1.87657
Aplan-10C-3676-Thy_vs_Aplan-10C-3676-Tail	chr2	127539236	127539236	C	G	Prom2	c.719G>C	p.Arg240Pro	missense_variant	MODERATE	52	0	0.023	42	15	0.364	5.97404
Aplan-10C-3676-Thy_vs_Aplan-10C-3676-Tail	chr2	127741031	127741031	C	G	Nphp1	c.1961G>C	p.Arg654Pro	missense_variant	MODERATE	51	0	0.023	46	13	0.3	4.66087
Aplan-10C-3676-Thy_vs_Aplan-10C-3676-Tail	chr2	129081280	129081280	C	G	Ttl	c.540C>G	p.His180Gln	missense_variant	MODERATE	54	0	0.023	43	8	0.21	2.99854
Aplan-10C-3676-Thy_vs_Aplan-10C-3676-Tail	chr2	130275711	130275711	C	G	Nop56	c.257C>G	p.Ser86Cys	missense_variant	MODERATE	94	0	0.011	85	23	0.277	6.52693
Aplan-10C-3676-Thy_vs_Aplan-10C-3676-Tail	chr2	130394395	130394395	C	G	Cpxm1	c.927G>C	p.Thr309Thr	synonymous_variant	LOW	63	0	0.019	64	16	0.261	4.98016
Aplan-10C-3676-Thy_vs_Aplan-10C-3676-Tail	chr2	130740415	130740415	C	T	4930402H24Rik	c.2010G>A	p.Ala670Ala	synonymous_variant	LOW	78	0	0.016	57	25	0.417	6.38238
Aplan-10C-3676-Thy_vs_Aplan-10C-3676-Tail	chr2	132821407	132821407	C	G	Mcm8	c.528C>G	p.Asn176Lys	missense_variant	MODERATE	57	0	0.023	44	17	0.405	7.06632
Aplan-10C-3676-Thy_vs_Aplan-10C-3676-Tail	chr2	136549803	136549803	G	C	Ankef1	c.911G>C	p.Arg304Pro	missense_variant	MODERATE	50	0	0.023	40	10	0.291	3.82922
Aplan-10C-3676-Thy_vs_Aplan-10C-3676-Tail	chr2	145878883	145878883	C	G	Rin2	c.2000C>G	p.Thr667Ser	missense_variant	MODERATE	68	0	0.017	61	16	0.312	5.72052
Aplan-10C-3676-Thy_vs_Aplan-10C-3676-Tail	chr2	150815649	150815649	C	G	Pygb	c.1031C>G	p.Ala344Gly	missense_variant	MODERATE	61	0	0.017	69	26	0.358	6.58395
Aplan-10C-3676-Thy_vs_Aplan-10C-3676-Tail	chr2	151936732	151936732	C	G	Angpt4	c.1035C>G	p.Ser345Arg	missense_variant	MODERATE	35	0	0.033	31	9	0.313	3.26388
Aplan-10C-3676-Thy_vs_Aplan-10C-3676-Tail	chr2	152485924	152485924	C	G	Defb22	c.340G>C	p.Ala114Pro	missense_variant	MODERATE	84	0	0.014	47	12	0.295	5.78332
Aplan-10C-3676-Thy_vs_Aplan-10C-3676-Tail	chr2	152520168	152520168	C	G	Defb28	c.247C>G	p.Arg83Gly	missense_variant	MODERATE	80	0	0.014	86	23	0.284	6.498
Aplan-10C-3676-Thy_vs_Aplan-10C-3676-Tail	chr2	152574780	152574780	C	G	Defb21	c.175C>G	p.Arg59Gly	missense_variant	MODERATE	100	0	0.012	79	27	0.333	6.00743
Aplan-10C-3676-Thy_vs_Aplan-10C-3676-Tail	chr2	153054368	153054368	C	G	Xkr7	c.1141C>G	p.Arg381Gly	missense_variant	MODERATE	72	0	0.015	56	20	0.333	6.58155
Aplan-10C-3676-Thy_vs_Aplan-10C-3676-Tail	chr2	153908583	153908583	C	G	Bpifb6	c.993C>G	p.His331Gln	missense_variant	MODERATE	39	1	0.057	34	12	0.387	3.45247
Aplan-10C-3676-Thy_vs_Aplan-10C-3676-Tail	chr2	154143787	154143787	C	G	Bpifa1	c.21C>G	p.Leu7Leu	synonymous_variant	LOW	17	0	0.058	16	3	0.249	0.988686
Aplan-10C-3676-Thy_vs_Aplan-10C-3676-Tail	chr2	157779890	157779890	C	G	Ctnnbl1	c.298C>G	p.Arg100Gly	missense_variant	MODERATE	13	0	0.07	14	6	0.385	1.79746
Aplan-10C-3676-Thy_vs_Aplan-10C-3676-Tail	chr2	158436496	158436496	C	G	Ralgapb	c.879C>G	p.Pro293Pro	synonymous_variant	LOW	84	0	0.014	65	29	0.417	6.43202
Aplan-10C-3676-Thy_vs_Aplan-10C-3676-Tail	chr2	164635889	164635889	C	G	Wfdc16	c.239G>C	p.Arg80Pro	missense_variant	MODERATE	21	0	0.053	20	8	0.368	2.87996
Aplan-10C-3676-Thy_vs_Aplan-10C-3676-Tail	chr2	165112590	165112590	C	G	Cdh22	c.2010G>C	p.Glu670Asp	missense_variant	MODERATE	24	0	0.045	19	7	0.471	2.80585
Aplan-10C-3676-Thy_vs_Aplan-10C-3676-Tail	chr2	165381744	165381744	C	G	Zfp334	c.378G>C	p.Ser126Ser	synonymous_variant	LOW	99	0	0.012	108	34	0.311	5.91606
Aplan-10C-3676-Thy_vs_Aplan-10C-3676-Tail	chr2	165408896	165408896	C	G	Slc13a3	c.1552G>C	p.Ala518Pro	missense_variant	MODERATE	38	0	0.029	21	5	0.333	2.39098
Aplan-10C-3676-Thy_vs_Aplan-10C-3676-Tail	chr2	165787191	165787191	G	C	Zmynd8	c.3592C>G	p.Pro1198Ala	missense_variant	MODERATE	57	0	0.022	35	8	0.25	3.59713
Aplan-10C-3676-Thy_vs_Aplan-10C-3676-Tail	chr2	166587072	166587072	C	G	Prex1	c.2600G>C	p.Arg867Pro	missense_variant	MODERATE	28	0	0.043	23	5	0.25	1.84392
Aplan-10C-3676-Thy_vs_Aplan-10C-3676-Tail	chr2	166890416	166890416	C	G	Arfgef2	c.4924C>G	p.Arg1642Gly	missense_variant	MODERATE	32	1	0.047	28	9	0.391	2.40217
Aplan-10C-3676-Thy_vs_Aplan-10C-3676-Tail	chr2	167538864	167538864	C	T	Snai1	c.276C>T	p.Ser92Ser	synonymous_variant	LOW	23	0	0.044	19	7	0.389	2.72869
Aplan-10C-3676-Thy_vs_Aplan-10C-3676-Tail	chr2	178379540	178379540	G	C	Sycp2	c.1492C>G	p.Arg498Gly	missense_variant	MODERATE	48	0	0.024	64	24	0.397	6.14188
Aplan-10C-3676-Thy_vs_Aplan-10C-3676-Tail	chr2	180188355	180188355	C	G	Lama5	c.5684G>C	p.Arg1895Pro	missense_variant	MODERATE	27	0	0.039	22	6	0.263	2.27281
Aplan-10C-3676-Thy_vs_Aplan-10C-3676-Tail	chr2	180973455	180973455	C	G	Arfgap1	c.444-6C>G		splice_region_variant&intron_variant	LOW	77	0	0.016	59	17	0.353	6.82281
Aplan-10C-3676-Thy_vs_Aplan-10C-3676-Tail	chr2	181574375	181574375	C	G	Uckl1	c.576G>C	p.Lys192Asn	missense_variant	MODERATE	79	0	0.014	68	16	0.246	5.82158
Aplan-10C-3676-Thy_vs_Aplan-10C-3676-Tail	chr2	181697064	181697064	G	C	Lkaaear1	c.478C>G	p.Leu160Val	missense_variant	MODERATE	40	0	0.028	37	9	0.258	3.11286
Aplan-10C-3676-Thy_vs_Aplan-10C-3676-Tail	chr3	14778359	14778359	C	G	Car1	c.26G>C	p.Gly9Ala	missense_variant	MODERATE	104	0	0.012	75	28	0.367	6.46159
Aplan-10C-3676-Thy_vs_Aplan-10C-3676-Tail	chr3	20099778	20099778	G	C	Hltf	c.1877G>C	p.Arg626Pro	missense_variant&splice_region_variant	MODERATE	40	0	0.03	43	10	0.243	2.94433
Aplan-10C-3676-Thy_vs_Aplan-10C-3676-Tail	chr3	29979923	29979923	C	A	Mecom	c.631G>T	p.Glu211*	stop_gained	HIGH	59	0	0.019	52	13	0.276	4.67481
Aplan-10C-3676-Thy_vs_Aplan-10C-3676-Tail	chr3	40812178	40812178	G	C	Plk4	c.2290G>C	p.Val764Leu	missense_variant	MODERATE	58	0	0.019	53	16	0.286	5.73995
Aplan-10C-3676-Thy_vs_Aplan-10C-3676-Tail	chr3	52345855	52345855	G	A	Foxo1	c.1438G>A	p.Gly480Arg	missense_variant	MODERATE	92	0	0.012	80	24	0.301	6.02203
Aplan-10C-3676-Thy_vs_Aplan-10C-3676-Tail	chr3	54782577	54782577	C	G	Smad9	c.217C>G	p.Arg73Gly	missense_variant	MODERATE	38	0	0.028	30	10	0.333	3.98575
Aplan-10C-3676-Thy_vs_Aplan-10C-3676-Tail	chr3	61004199	61004199	C	G	P2ry1	c.758C>G	p.Pro253Arg	missense_variant	MODERATE	156	0	0.007343	98	23	0.244	6.09398
Aplan-10C-3676-Thy_vs_Aplan-10C-3676-Tail	chr3	62484991	62484991	C	G	Dhx36	c.1613G>C	p.Arg538Pro	missense_variant	MODERATE	93	0	0.013	102	33	0.33	6.26847
Aplan-10C-3676-Thy_vs_Aplan-10C-3676-Tail	chr3	68916246	68916246	G	C	Ift80	c.1682C>G	p.Pro561Arg	missense_variant	MODERATE	35	0	0.031	65	13	0.235	2.4477
Aplan-10C-3676-Thy_vs_Aplan-10C-3676-Tail	chr3	68950458	68950458	C	G	Ift80	c.853G>C	p.Ala285Pro	missense_variant	MODERATE	93	0	0.013	62	14	0.215	5.99794
Aplan-10C-3676-Thy_vs_Aplan-10C-3676-Tail	chr3	75613217	75613217	C	G	Serpini1	c.120C>G	p.Thr40Thr	synonymous_variant	LOW	53	0	0.024	39	17	0.457	7.44133
Aplan-10C-3676-Thy_vs_Aplan-10C-3676-Tail	chr3	79481837	79481837	C	G	Fnip2	c.1496G>C	p.Arg499Pro	missense_variant	MODERATE	56	0	0.021	45	15	0.377	5.93587
Aplan-10C-3676-Thy_vs_Aplan-10C-3676-Tail	chr3	79821326	79821326	C	G	Tmem144	c.841G>C	p.Ala281Pro	missense_variant	MODERATE	94	1	0.028	42	10	0.294	4.53333
Aplan-10C-3676-Thy_vs_Aplan-10C-3676-Tail	chr3	79936818	79936818	G	A	Fam198b	c.1343G>A	p.Arg448Gln	missense_variant	MODERATE	35	0	0.029	31	12	0.379	4.54263
Aplan-10C-3676-Thy_vs_Aplan-10C-3676-Tail	chr3	84448830	84448830	C	G	Fhdc1	c.1306G>C	p.Glu436Gln	missense_variant	MODERATE	60	1	0.022	36	19	0.516	7.11508
Aplan-10C-3676-Thy_vs_Aplan-10C-3676-Tail	chr3	84593998	84593998	C	G	Tigd4	c.221C>G	p.Pro74Arg	missense_variant	MODERATE	120	0	0.009516	108	29	0.282	5.89646
Aplan-10C-3676-Thy_vs_Aplan-10C-3676-Tail	chr3	84958586	84958586	C	G	Fbxw7	c.676C>G	p.Arg226Gly	missense_variant	MODERATE	55	0	0.022	46	10	0.237	3.67331
Aplan-10C-3676-Thy_vs_Aplan-10C-3676-Tail	chr3	86120623	86120623	C	T	Sh3d19	c.1806C>T	p.Tyr602Tyr	synonymous_variant	LOW	50	0	0.024	54	18	0.337	5.76153
Aplan-10C-3676-Thy_vs_Aplan-10C-3676-Tail	chr3	86815129	86815129	C	G	Dclk2	c.1244G>C	p.Gly415Ala	missense_variant	MODERATE	56	0	0.023	39	14	0.333	6.13195
Aplan-10C-3676-Thy_vs_Aplan-10C-3676-Tail	chr3	87256843	87256843	C	G	Fcrls	c.978G>C	p.Ala326Ala	synonymous_variant	LOW	63	0	0.017	41	17	0.38	6.31538
Aplan-10C-3676-Thy_vs_Aplan-10C-3676-Tail	chr3	87536527	87536527	C	G	Etv3	c.1417C>G	p.Arg473Gly	missense_variant	MODERATE	15	0	0.063	34	7	0.2	1.0742
Aplan-10C-3676-Thy_vs_Aplan-10C-3676-Tail	chr3	87741457	87741457	C	G	Lrrc71	c.1219G>C	p.Ala407Pro	missense_variant	MODERATE	62	1	0.022	43	13	0.334	4.59224
Aplan-10C-3676-Thy_vs_Aplan-10C-3676-Tail	chr3	88158127	88158127	C	T	Mef2d	c.352C>T	p.Arg118Trp	missense_variant	MODERATE	20	0	0.056	20	5	0.252	1.32676
Aplan-10C-3676-Thy_vs_Aplan-10C-3676-Tail	chr3	88378221	88378221	C	G	Bglap2	c.143G>C	p.Arg48Pro	missense_variant	MODERATE	133	0	0.008219	94	17	0.202	6.91124
Aplan-10C-3676-Thy_vs_Aplan-10C-3676-Tail	chr3	88378618	88378618	G	C	Bglap2	c.33C>G	p.Ala11Ala	synonymous_variant	LOW	90	0	0.013	63	20	0.321	6.99162
Aplan-10C-3676-Thy_vs_Aplan-10C-3676-Tail	chr3	88633335	88633335	G	C	Arhgef2	c.548G>C	p.Arg183Pro	missense_variant	MODERATE	58	0	0.019	62	27	0.407	5.8354
Aplan-10C-3676-Thy_vs_Aplan-10C-3676-Tail	chr3	88747773	88747773	G	C	Syt11	c.1220C>G	p.Ala407Gly	missense_variant	MODERATE	48	1	0.027	40	12	0.305	3.40443
Aplan-10C-3676-Thy_vs_Aplan-10C-3676-Tail	chr3	89159928	89159928	C	G	Hcn3	c.132G>C	p.Lys44Asn	missense_variant	MODERATE	16	0	0.056	17	7	0.412	2.14085
Aplan-10C-3676-Thy_vs_Aplan-10C-3676-Tail	chr3	89232068	89232068	G	C	Muc1	c.1774G>C	p.Gly592Arg	missense_variant	MODERATE	44	0	0.023	35	14	0.412	5.72942
Aplan-10C-3676-Thy_vs_Aplan-10C-3676-Tail	chr3	89232112	89232112	G	C	Muc1	c.1818G>C	p.Glu606Asp	missense_variant	MODERATE	36	0	0.029	24	11	0.419	5.13764
Aplan-10C-3676-Thy_vs_Aplan-10C-3676-Tail	chr3	89645504	89645504	C	G	Kcnn3	c.1514C>G	p.Thr505Arg	missense_variant	MODERATE	65	0	0.018	43	12	0.297	5.2596
Aplan-10C-3676-Thy_vs_Aplan-10C-3676-Tail	chr3	90087449	90087449	C	G	Tpm3	c.378-6C>G		splice_region_variant&intron_variant	LOW	58	0	0.02	54	11	0.229	3.73896
Aplan-10C-3676-Thy_vs_Aplan-10C-3676-Tail	chr3	90237774	90237774	G	C	Creb3l4	c.1070C>G	p.Pro357Arg	missense_variant	MODERATE	106	0	0.012	99	33	0.347	6.22774
Aplan-10C-3676-Thy_vs_Aplan-10C-3676-Tail	chr3	90252094	90252094	G	C	Slc39a1	c.727G>C	p.Gly243Arg	missense_variant	MODERATE	53	0	0.021	36	11	0.343	4.78379
Aplan-10C-3676-Thy_vs_Aplan-10C-3676-Tail	chr3	90252195	90252195	G	C	Slc39a1	c.828G>C	p.Glu276Asp	missense_variant	MODERATE	25	0	0.037	19	6	0.333	2.41526
Aplan-10C-3676-Thy_vs_Aplan-10C-3676-Tail	chr3	90392277	90392277	G	C	Ints3	c.2983C>G	p.Arg995Gly	missense_variant	MODERATE	49	0	0.023	29	11	0.429	5.35186
Aplan-10C-3676-Thy_vs_Aplan-10C-3676-Tail	chr3	90392301	90392301	G	C	Ints3	c.2959C>G	p.Arg987Gly	missense_variant	MODERATE	48	0	0.024	28	12	0.481	6.00849
Aplan-10C-3676-Thy_vs_Aplan-10C-3676-Tail	chr3	90424055	90424055	C	G	Ints3	c.180G>C	p.Ser60Ser	synonymous_variant	LOW	70	0	0.017	47	12	0.262	5.16636
Aplan-10C-3676-Thy_vs_Aplan-10C-3676-Tail	chr3	92584250	92584250	C	T	Smcp	c.451G>A	p.Ala151Thr	missense_variant	MODERATE	36	1	0.067	35	15	0.455	4.39716
Aplan-10C-3676-Thy_vs_Aplan-10C-3676-Tail	chr3	94769969	94769969	C	G	Cgn	c.2273G>C	p.Arg758Pro	missense_variant	MODERATE	26	0	0.043	19	3	0.21	1.16566
Aplan-10C-3676-Thy_vs_Aplan-10C-3676-Tail	chr3	94779250	94779250	C	G	Cgn	c.741G>C	p.Ser247Ser	synonymous_variant	LOW	57	0	0.021	44	13	0.325	5.19644
Aplan-10C-3676-Thy_vs_Aplan-10C-3676-Tail	chr3	95172337	95172337	C	G	Sema6c	c.1941C>G	p.Phe647Leu	missense_variant	MODERATE	34	0	0.036	29	9	0.333	3.3735
Aplan-10C-3676-Thy_vs_Aplan-10C-3676-Tail	chr3	95684583	95684583	C	G	Adamtsl4	c.194G>C	p.Arg65Pro	missense_variant	MODERATE	19	0	0.048	24	8	0.381	2.25234
Aplan-10C-3676-Thy_vs_Aplan-10C-3676-Tail	chr3	95901265	95901265	G	C	Car14	c.84C>G	p.His28Gln	missense_variant	MODERATE	22	0	0.048	24	10	0.403	3.19398
Aplan-10C-3676-Thy_vs_Aplan-10C-3676-Tail	chr3	95904406	95904406	G	C	Car14	c.-32C>G		5_prime_UTR_premature_start_codon_gain_variant	LOW	64	0	0.021	46	16	0.344	6.84763
Aplan-10C-3676-Thy_vs_Aplan-10C-3676-Tail	chr3	96285861	96285861	C	G	Fcgr1	c.819G>C	p.Thr273Thr	synonymous_variant	LOW	49	0	0.023	42	10	0.28	3.64026
Aplan-10C-3676-Thy_vs_Aplan-10C-3676-Tail	chr3	96286061	96286061	C	G	Fcgr1	c.619G>C	p.Val207Leu	missense_variant	MODERATE	55	0	0.022	38	12	0.314	5.18713
Aplan-10C-3676-Thy_vs_Aplan-10C-3676-Tail	chr3	96287090	96287090	C	G	Fcgr1	c.480G>C	p.Ser160Ser	synonymous_variant	LOW	101	0	0.012	81	36	0.48	5.87916
Aplan-10C-3676-Thy_vs_Aplan-10C-3676-Tail	chr3	97582853	97582853	C	G	Chd1l	c.1385G>C	p.Arg462Pro	missense_variant	MODERATE	48	0	0.024	32	6	0.231	2.52062
Aplan-10C-3676-Thy_vs_Aplan-10C-3676-Tail	chr3	97746704	97746704	C	G	Pde4dip	c.2653G>C	p.Glu885Gln	missense_variant	MODERATE	47	0	0.024	36	9	0.276	3.543
Aplan-10C-3676-Thy_vs_Aplan-10C-3676-Tail	chr3	97754461	97754461	G	C	Pde4dip	c.1798C>G	p.Arg600Gly	missense_variant	MODERATE	53	0	0.021	50	11	0.223	3.72751
Aplan-10C-3676-Thy_vs_Aplan-10C-3676-Tail	chr3	97841708	97841708	C	G	Pde4dip	c.316G>C	p.Gly106Arg	missense_variant	MODERATE	49	0	0.026	37	8	0.258	3.13809
Aplan-10C-3676-Thy_vs_Aplan-10C-3676-Tail	chr3	100109424	100109424	G	C	Spag17	c.6514G>C	p.Gly2172Arg	missense_variant	MODERATE	43	0	0.023	73	21	0.263	4.60863
Aplan-10C-3676-Thy_vs_Aplan-10C-3676-Tail	chr3	101013351	101013351	C	G	Cd101	c.1243G>C	p.Val415Leu	missense_variant	MODERATE	19	0	0.059	23	8	0.348	2.31926
Aplan-10C-3676-Thy_vs_Aplan-10C-3676-Tail	chr3	101020673	101020673	C	G	Cd101	c.103G>C	p.Glu35Gln	missense_variant	MODERATE	59	0	0.019	39	14	0.353	6.33505
Aplan-10C-3676-Thy_vs_Aplan-10C-3676-Tail	chr3	101045688	101045688	G	A	Ptgfrn	c.2229C>T	p.Pro743Pro	synonymous_variant	LOW	59	0	0.02	28	7	0.298	3.6933
Aplan-10C-3676-Thy_vs_Aplan-10C-3676-Tail	chr3	101060958	101060958	C	G	Ptgfrn	c.1318G>C	p.Gly440Arg	missense_variant	MODERATE	71	0	0.015	54	15	0.319	6.02013
Aplan-10C-3676-Thy_vs_Aplan-10C-3676-Tail	chr3	103062494	103062494	C	G	Nras	c.411C>G	p.Tyr137*	stop_gained	HIGH	96	0	0.013	68	22	0.368	6.4412
Aplan-10C-3676-Thy_vs_Aplan-10C-3676-Tail	chr3	103587339	103587339	C	G	Syt6	c.619C>G	p.Arg207Gly	missense_variant	MODERATE	45	0	0.024	33	10	0.274	4.13336
Aplan-10C-3676-Thy_vs_Aplan-10C-3676-Tail	chr3	103587598	103587598	C	G	Syt6	c.878C>G	p.Pro293Arg	missense_variant	MODERATE	73	0	0.017	55	13	0.265	5.16402
Aplan-10C-3676-Thy_vs_Aplan-10C-3676-Tail	chr3	103587686	103587686	C	G	Syt6	c.966C>G	p.Arg322Arg	synonymous_variant	LOW	52	0	0.022	48	13	0.279	4.56651
Aplan-10C-3676-Thy_vs_Aplan-10C-3676-Tail	chr3	104947179	104947179	C	G	Wnt2b	c.962G>C	p.Arg321Pro	missense_variant	MODERATE	52	0	0.022	33	12	0.345	5.56914
Aplan-10C-3676-Thy_vs_Aplan-10C-3676-Tail	chr3	105668209	105668209	C	G	Kcnd3	c.1648C>G	p.Arg550Gly	missense_variant	MODERATE	65	0	0.016	55	13	0.25	4.78072
Aplan-10C-3676-Thy_vs_Aplan-10C-3676-Tail	chr3	105986293	105986293	C	T	Ovgp1	c.1381C>T	p.Arg461*	stop_gained	HIGH	169	0	0.006447	116	50	0.437	5.96481
Aplan-10C-3676-Thy_vs_Aplan-10C-3676-Tail	chr3	108077632	108077632	C	G	Ampd2	c.1195G>C	p.Glu399Gln	missense_variant	MODERATE	66	0	0.018	54	13	0.277	4.89783
Aplan-10C-3676-Thy_vs_Aplan-10C-3676-Tail	chr3	121450068	121450068	C	G	Cnn3	c.177C>G	p.Cys59Trp	missense_variant&splice_region_variant	MODERATE	72	0	0.016	79	21	0.297	5.89998
Aplan-10C-3676-Thy_vs_Aplan-10C-3676-Tail	chr3	121463524	121463524	C	G	Slc44a3	c.1519G>C	p.Gly507Arg	missense_variant	MODERATE	108	0	0.011	97	34	0.38	6.01089
Aplan-10C-3676-Thy_vs_Aplan-10C-3676-Tail	chr3	125437965	125437965	G	C	Ndst4	c.182G>C	p.Arg61Pro	missense_variant	MODERATE	133	0	0.008817	81	31	0.386	6.56644
Aplan-10C-3676-Thy_vs_Aplan-10C-3676-Tail	chr3	126930076	126930076	G	C	Ank2	c.11508C>G	p.Asp3836Glu	missense_variant	MODERATE	69	0	0.017	51	17	0.34	7.10915
Aplan-10C-3676-Thy_vs_Aplan-10C-3676-Tail	chr3	138325139	138325139	C	G	Adh6a	c.388C>G	p.Arg130Gly	missense_variant	MODERATE	35	0	0.029	33	14	0.441	5.17755
Aplan-10C-3676-Thy_vs_Aplan-10C-3676-Tail	chr3	142538834	142538834	C	G	Gbp7	c.541C>G	p.Arg181Gly	missense_variant	MODERATE	48	0	0.025	45	13	0.306	4.55088
Aplan-10C-3676-Thy_vs_Aplan-10C-3676-Tail	chr3	142630758	142630758	C	G	Gbp2	c.868C>G	p.Arg290Gly	missense_variant&splice_region_variant	MODERATE	76	2	0.031	69	23	0.319	6.09128
Aplan-10C-3676-Thy_vs_Aplan-10C-3676-Tail	chr3	145086410	145086410	C	G	Clca2	c.1089G>C	p.Ser363Ser	synonymous_variant	LOW	88	0	0.014	100	35	0.355	6.49471
Aplan-10C-3676-Thy_vs_Aplan-10C-3676-Tail	chr3	146094289	146094289	C	G	Wdr63	c.495G>C	p.Ser165Ser	synonymous_variant	LOW	51	0	0.023	40	14	0.353	5.66304
Aplan-10C-3676-Thy_vs_Aplan-10C-3676-Tail	chr3	148839745	148839745	C	T	Adgrl2	c.2043G>A	p.Thr681Thr	synonymous_variant	LOW	24	0	0.043	31	13	0.387	3.69548
Aplan-10C-3676-Thy_vs_Aplan-10C-3676-Tail	chr4	3585148	3585148	C	G	Tgs1	c.287C>G	p.Pro96Arg	missense_variant	MODERATE	124	0	0.01	90	26	0.286	6.33398
Aplan-10C-3676-Thy_vs_Aplan-10C-3676-Tail	chr4	33095408	33095408	C	G	Gabrr2	c.1296C>G	p.Ile432Met	missense_variant	MODERATE	80	0	0.014	56	22	0.376	6.69345
Aplan-10C-3676-Thy_vs_Aplan-10C-3676-Tail	chr4	41766203	41766203	C	G	Il11ra1	c.739C>G	p.Arg247Gly	missense_variant	MODERATE	102	0	0.012	83	15	0.212	5.55273
Aplan-10C-3676-Thy_vs_Aplan-10C-3676-Tail	chr4	46395988	46395988	G	C	Hemgn	c.1247C>G	p.Ser416Trp	missense_variant	MODERATE	149	1	0.015	141	29	0.211	6.02199
Aplan-10C-3676-Thy_vs_Aplan-10C-3676-Tail	chr4	52994052	52994052	C	G	Nipsnap3a	c.132C>G	p.Pro44Pro	synonymous_variant	LOW	133	0	0.009025	90	30	0.354	6.46727
Aplan-10C-3676-Thy_vs_Aplan-10C-3676-Tail	chr4	58068482	58068482	C	G	Svep1	c.9303G>C	p.Thr3101Thr	synonymous_variant	LOW	77	0	0.015	78	17	0.222	5.24086
Aplan-10C-3676-Thy_vs_Aplan-10C-3676-Tail	chr4	58373683	58373683	C	G	Musk	c.2652C>G	p.Cys884Trp	missense_variant	MODERATE	35	0	0.032	30	9	0.298	3.34915
Aplan-10C-3676-Thy_vs_Aplan-10C-3676-Tail	chr4	59898900	59898900	C	G	Snx30	c.1255-8C>G		splice_region_variant&intron_variant	LOW	69	0	0.017	69	23	0.385	6.03891
Aplan-10C-3676-Thy_vs_Aplan-10C-3676-Tail	chr4	62336400	62336400	C	G	Fkbp15	c.861+1G>C		splice_donor_variant&intron_variant	HIGH	57	0	0.021	47	10	0.25	3.70249
Aplan-10C-3676-Thy_vs_Aplan-10C-3676-Tail	chr4	62336422	62336422	C	G	Fkbp15	c.840G>C	p.Val280Val	synonymous_variant	LOW	60	0	0.02	45	11	0.268	4.38996
Aplan-10C-3676-Thy_vs_Aplan-10C-3676-Tail	chr4	62543141	62543141	G	C	4933430I17Rik	c.908G>C	p.Arg303Pro	missense_variant	MODERATE	58	0	0.022	57	12	0.244	3.94045
Aplan-10C-3676-Thy_vs_Aplan-10C-3676-Tail	chr4	63225394	63225394	C	T	Col27a1	c.1318C>T	p.Arg440Cys	missense_variant	MODERATE	93	0	0.012	72	31	0.403	5.87833
Aplan-10C-3676-Thy_vs_Aplan-10C-3676-Tail	chr4	65613582	65613582	G	C	Trim32	c.375G>C	p.Arg125Arg	synonymous_variant	LOW	21	0	0.048	19	4	0.278	1.37251
Aplan-10C-3676-Thy_vs_Aplan-10C-3676-Tail	chr4	65614831	65614831	C	G	Trim32	c.1624C>G	p.Arg542Gly	missense_variant	MODERATE	60	0	0.02	41	11	0.214	4.70162
Aplan-10C-3676-Thy_vs_Aplan-10C-3676-Tail	chr4	70223523	70223523	C	G	Cdk5rap2	c.5412+7G>C		splice_region_variant&intron_variant	LOW	65	0	0.018	56	21	0.364	6.17622
Aplan-10C-3676-Thy_vs_Aplan-10C-3676-Tail	chr4	70281134	70281134	C	G	Cdk5rap2	c.2752G>C	p.Gly918Arg	missense_variant	MODERATE	79	0	0.014	67	20	0.31	6.0152
Aplan-10C-3676-Thy_vs_Aplan-10C-3676-Tail	chr4	83742923	83742923	C	G	Ccdc171	c.3274-5C>G		splice_region_variant&intron_variant	LOW	14	0	0.079	18	6	0.353	1.62343
Aplan-10C-3676-Thy_vs_Aplan-10C-3676-Tail	chr4	86415541	86415541	G	C	Adamtsl1	c.4506G>C	p.Pro1502Pro	synonymous_variant	LOW	65	0	0.019	43	20	0.448	6.34763
Aplan-10C-3676-Thy_vs_Aplan-10C-3676-Tail	chr4	94924920	94924920	C	G	Eqtn	c.427+1G>C		splice_donor_variant&intron_variant	HIGH	104	0	0.012	87	29	0.32	6.67301
Aplan-10C-3676-Thy_vs_Aplan-10C-3676-Tail	chr4	99961519	99961519	C	G	Pgm2	c.310C>G	p.Arg104Gly	missense_variant	MODERATE	62	1	0.041	37	11	0.3	4.22657
Aplan-10C-3676-Thy_vs_Aplan-10C-3676-Tail	chr4	100974122	100974122	C	G	Cachd1	c.2110C>G	p.Arg704Gly	missense_variant	MODERATE	66	0	0.019	45	16	0.385	7.10087
Aplan-10C-3676-Thy_vs_Aplan-10C-3676-Tail	chr4	101618622	101618622	C	G	Dnajc6	c.1691C>G	p.Thr564Arg	missense_variant	MODERATE	60	1	0.045	29	6	0.214	2.36022
Aplan-10C-3676-Thy_vs_Aplan-10C-3676-Tail	chr4	104727757	104727757	G	C	Dab1	c.1093G>C	p.Ala365Pro	missense_variant	MODERATE	47	0	0.024	41	9	0.222	3.21241
Aplan-10C-3676-Thy_vs_Aplan-10C-3676-Tail	chr4	104990320	104990320	C	G	1700024P16Rik	c.1614C>G	p.Pro538Pro	synonymous_variant	LOW	62	0	0.019	40	14	0.342	6.4086
Aplan-10C-3676-Thy_vs_Aplan-10C-3676-Tail	chr4	105051198	105051198	G	C	Prkaa2	c.475+4C>G		splice_region_variant&intron_variant	LOW	31	0	0.034	39	12	0.313	3.16036
Aplan-10C-3676-Thy_vs_Aplan-10C-3676-Tail	chr4	106622935	106622935	C	G	Ttc22	c.385C>G	p.Leu129Val	missense_variant	MODERATE	11	0	0.077	6	2	0.375	0.957448
Aplan-10C-3676-Thy_vs_Aplan-10C-3676-Tail	chr4	107040013	107040013	C	G	Ssbp3	c.907C>G	p.Pro303Ala	missense_variant	MODERATE	90	0	0.014	79	19	0.246	6.84198
Aplan-10C-3676-Thy_vs_Aplan-10C-3676-Tail	chr4	107293906	107293906	C	T	Dio1	c.524G>A	p.Arg175Gln	missense_variant	MODERATE	67	0	0.02	40	8	0.235	3.6272
Aplan-10C-3676-Thy_vs_Aplan-10C-3676-Tail	chr4	109072832	109072832	C	G	Osbpl9	c.1113G>C	p.Leu371Leu	synonymous_variant	LOW	40	1	0.052	54	16	0.289	3.13938
Aplan-10C-3676-Thy_vs_Aplan-10C-3676-Tail	chr4	109456957	109456957	C	G	Rnf11	c.234G>C	p.Gln78His	missense_variant	MODERATE	71	1	0.037	66	16	0.262	4.4567
Aplan-10C-3676-Thy_vs_Aplan-10C-3676-Tail	chr4	110206487	110206487	G	C	Elavl4	c.1003C>G	p.Arg335Gly	missense_variant	MODERATE	39	0	0.031	28	11	0.4	4.77701
Aplan-10C-3676-Thy_vs_Aplan-10C-3676-Tail	chr4	115625197	115625197	C	G	Cyp4b1	c.1384G>C	p.Glu462Gln	missense_variant	MODERATE	41	0	0.027	37	17	0.452	6.59589
Aplan-10C-3676-Thy_vs_Aplan-10C-3676-Tail	chr4	115923690	115923690	C	G	Dmbx1	c.113G>C	p.Arg38Pro	missense_variant	MODERATE	16	0	0.063	12	4	0.336	1.61662
Aplan-10C-3676-Thy_vs_Aplan-10C-3676-Tail	chr4	116985688	116985688	C	G	Zswim5	c.2629C>G	p.Arg877Gly	missense_variant	MODERATE	129	0	0.01	149	54	0.361	5.83684
Aplan-10C-3676-Thy_vs_Aplan-10C-3676-Tail	chr4	117109748	117109748	C	G	Ptch2	c.1721C>G	p.Ala574Gly	missense_variant	MODERATE	34	0	0.03	29	8	0.259	2.95536
Aplan-10C-3676-Thy_vs_Aplan-10C-3676-Tail	chr4	117109845	117109845	C	T	Ptch2	c.1818C>T	p.Cys606Cys	synonymous_variant	LOW	34	0	0.029	28	8	0.285	3.03656
Aplan-10C-3676-Thy_vs_Aplan-10C-3676-Tail	chr4	117857366	117857366	C	G	Slc6a9	c.483C>G	p.Asp161Glu	missense_variant	MODERATE	43	0	0.025	46	13	0.287	4.00703
Aplan-10C-3676-Thy_vs_Aplan-10C-3676-Tail	chr4	117869958	117869958	C	G	Ccdc24	c.554G>C	p.Arg185Pro	missense_variant	MODERATE	49	0	0.021	39	17	0.447	7.07982
Aplan-10C-3676-Thy_vs_Aplan-10C-3676-Tail	chr4	118054656	118054656	C	G	St3gal3	c.157G>C	p.Gly53Arg	missense_variant	MODERATE	30	0	0.043	50	14	0.275	3.15728
Aplan-10C-3676-Thy_vs_Aplan-10C-3676-Tail	chr4	118478930	118478930	C	G	Tie1	c.2138G>C	p.Arg713Pro	missense_variant	MODERATE	27	0	0.047	37	11	0.3	2.79939
Aplan-10C-3676-Thy_vs_Aplan-10C-3676-Tail	chr4	119448087	119448087	G	C	Zmynd12	c.723G>C	p.Ser241Ser	synonymous_variant	LOW	81	0	0.015	77	34	0.446	5.8522
Aplan-10C-3676-Thy_vs_Aplan-10C-3676-Tail	chr4	123130507	123130507	C	G	Ppie	c.556G>C	p.Gly186Arg	missense_variant	MODERATE	44	0	0.027	34	7	0.233	2.69117
Aplan-10C-3676-Thy_vs_Aplan-10C-3676-Tail	chr4	123216075	123216075	C	G	Nt5c1a	c.966C>G	p.Ile322Met	missense_variant	MODERATE	55	0	0.022	37	8	0.212	3.38218
Aplan-10C-3676-Thy_vs_Aplan-10C-3676-Tail	chr4	123390547	123390547	C	G	Macf1	c.17110G>C	p.Glu5704Gln	missense_variant	MODERATE	110	0	0.012	72	20	0.298	7.22209
Aplan-10C-3676-Thy_vs_Aplan-10C-3676-Tail	chr4	123469860	123469860	G	C	Macf1	c.9973C>G	p.Arg3325Gly	missense_variant	MODERATE	50	0	0.023	44	14	0.316	5.18071
Aplan-10C-3676-Thy_vs_Aplan-10C-3676-Tail	chr4	125047577	125047577	C	G	Gnl2	c.1113C>G	p.Asp371Glu	missense_variant	MODERATE	61	0	0.019	61	17	0.302	5.37862
Aplan-10C-3676-Thy_vs_Aplan-10C-3676-Tail	chr4	126032259	126032259	C	G	Csf3r	c.636C>G	p.Ser212Ser	synonymous_variant	LOW	45	0	0.027	31	8	0.291	3.37844
Aplan-10C-3676-Thy_vs_Aplan-10C-3676-Tail	chr4	126240710	126240710	G	C	Map7d1	c.630+4C>G		splice_region_variant&intron_variant	LOW	46	0	0.027	31	8	0.31	3.42608
Aplan-10C-3676-Thy_vs_Aplan-10C-3676-Tail	chr4	126586111	126586111	C	G	Clspn	c.3246C>G	p.Thr1082Thr	synonymous_variant	LOW	92	0	0.013	59	22	0.4	7.10255
Aplan-10C-3676-Thy_vs_Aplan-10C-3676-Tail	chr4	126586196	126586196	C	G	Clspn	c.3331C>G	p.Arg1111Gly	missense_variant	MODERATE	75	0	0.015	40	14	0.35	7.18579
Aplan-10C-3676-Thy_vs_Aplan-10C-3676-Tail	chr4	129225456	129225456	G	C	C77080	c.470C>G	p.Pro157Arg	missense_variant	MODERATE	24	0	0.047	15	4	0.302	1.78001
Aplan-10C-3676-Thy_vs_Aplan-10C-3676-Tail	chr4	129592353	129592353	G	C	Eif3i	c.810C>G	p.Phe270Leu	missense_variant	MODERATE	53	0	0.024	26	7	0.23	3.64412
Aplan-10C-3676-Thy_vs_Aplan-10C-3676-Tail	chr4	129693899	129693899	G	C	Tmem39b	c.118C>G	p.Arg40Gly	missense_variant	MODERATE	45	0	0.024	39	17	0.394	6.69962
Aplan-10C-3676-Thy_vs_Aplan-10C-3676-Tail	chr4	131897834	131897834	C	G	Srsf4	c.541C>G	p.Arg181Gly	missense_variant	MODERATE	43	0	0.024	32	8	0.268	3.2052
Aplan-10C-3676-Thy_vs_Aplan-10C-3676-Tail	chr4	132114076	132114076	C	T	Oprd1	c.578-8G>A		splice_region_variant&intron_variant	LOW	28	0	0.035	32	14	0.44	4.53031
Aplan-10C-3676-Thy_vs_Aplan-10C-3676-Tail	chr4	132314362	132314362	C	G	Trnau1ap	c.536G>C	p.Arg179Pro	missense_variant	MODERATE	46	0	0.026	45	20	0.471	6.87179
Aplan-10C-3676-Thy_vs_Aplan-10C-3676-Tail	chr4	132553104	132553104	C	G	Dnajc8	c.727C>G	p.Arg243Gly	missense_variant	MODERATE	72	0	0.016	61	17	0.303	6.36089
Aplan-10C-3676-Thy_vs_Aplan-10C-3676-Tail	chr4	132994999	132994999	C	G	Fgr	c.578C>G	p.Thr193Arg	missense_variant	MODERATE	38	0	0.031	26	11	0.394	4.98337
Aplan-10C-3676-Thy_vs_Aplan-10C-3676-Tail	chr4	132997217	132997217	G	C	Fgr	c.743G>C	p.Arg248Pro	missense_variant	MODERATE	67	0	0.018	63	23	0.382	5.98224
Aplan-10C-3676-Thy_vs_Aplan-10C-3676-Tail	chr4	133210468	133210468	C	G	Gpr3	c.892G>C	p.Ala298Pro	missense_variant	MODERATE	42	0	0.026	43	14	0.333	4.46167
Aplan-10C-3676-Thy_vs_Aplan-10C-3676-Tail	chr4	133251357	133251357	C	G	Map3k6	c.3268C>G	p.Arg1090Gly	missense_variant	MODERATE	53	0	0.022	35	8	0.257	3.43633
Aplan-10C-3676-Thy_vs_Aplan-10C-3676-Tail	chr4	133301753	133301753	C	G	Wdtc1	c.1021G>C	p.Gly341Arg	missense_variant	MODERATE	112	2	0.021	88	30	0.36	6.01882
Aplan-10C-3676-Thy_vs_Aplan-10C-3676-Tail	chr4	133693915	133693915	C	G	Arid1a	c.2578G>C	p.Ala860Pro	missense_variant	MODERATE	52	0	0.022	31	9	0.333	4.2123
Aplan-10C-3676-Thy_vs_Aplan-10C-3676-Tail	chr4	134364686	134364686	G	C	Extl1	c.855C>G	p.Ala285Ala	splice_region_variant&synonymous_variant	LOW	14	0	0.067	12	4	0.357	1.48004
Aplan-10C-3676-Thy_vs_Aplan-10C-3676-Tail	chr4	135744733	135744733	C	G	Il22ra1	c.579C>G	p.Pro193Pro	synonymous_variant	LOW	59	0	0.019	42	10	0.25	4.11584
Aplan-10C-3676-Thy_vs_Aplan-10C-3676-Tail	chr4	135774300	135774300	C	G	Myom3	c.810C>G	p.Ser270Arg	missense_variant	MODERATE	80	0	0.015	54	21	0.432	6.45974
Aplan-10C-3676-Thy_vs_Aplan-10C-3676-Tail	chr4	136240388	136240388	G	C	Asap3	c.1870G>C	p.Ala624Pro	missense_variant	MODERATE	70	0	0.016	42	16	0.4	6.12883
Aplan-10C-3676-Thy_vs_Aplan-10C-3676-Tail	chr4	136243520	136243520	G	C	Asap3	c.2622G>C	p.Leu874Leu	synonymous_variant	LOW	30	0	0.039	16	4	0.294	1.95261
Aplan-10C-3676-Thy_vs_Aplan-10C-3676-Tail	chr4	136771040	136771040	C	G	Ephb2	c.727G>C	p.Gly243Arg	missense_variant	MODERATE	48	0	0.025	36	9	0.312	3.59222
Aplan-10C-3676-Thy_vs_Aplan-10C-3676-Tail	chr4	136936301	136936301	G	C	Epha8	c.1437+6C>G		splice_region_variant&intron_variant	LOW	53	0	0.022	25	5	0.227	2.59917
Aplan-10C-3676-Thy_vs_Aplan-10C-3676-Tail	chr4	136951773	136951773	C	G	Epha8	c.148G>C	p.Ala50Pro	missense_variant	MODERATE	80	1	0.03	68	23	0.37	6.26241
Aplan-10C-3676-Thy_vs_Aplan-10C-3676-Tail	chr4	137455018	137455018	G	T	1700013G24Rik	c.483G>T	p.Leu161Leu	synonymous_variant	LOW	77	0	0.014	61	21	0.333	6.84052
Aplan-10C-3676-Thy_vs_Aplan-10C-3676-Tail	chr4	137455020	137455020	C	T	1700013G24Rik	c.485C>T	p.Ala162Val	missense_variant	MODERATE	77	0	0.014	61	21	0.333	6.84052
Aplan-10C-3676-Thy_vs_Aplan-10C-3676-Tail	chr4	137519914	137519914	C	G	Hspg2	c.3447C>G	p.Ser1149Arg	missense_variant	MODERATE	79	0	0.015	64	21	0.352	5.92688
Aplan-10C-3676-Thy_vs_Aplan-10C-3676-Tail	chr4	137535396	137535396	C	G	Hspg2	c.5070C>G	p.Gly1690Gly	synonymous_variant	LOW	58	0	0.021	50	16	0.356	6.01442
Aplan-10C-3676-Thy_vs_Aplan-10C-3676-Tail	chr4	137546567	137546567	C	G	Hspg2	c.8032C>G	p.Arg2678Gly	missense_variant	MODERATE	31	0	0.035	31	12	0.429	3.88386
Aplan-10C-3676-Thy_vs_Aplan-10C-3676-Tail	chr4	137548149	137548149	G	C	Hspg2	c.8287G>C	p.Gly2763Arg	missense_variant	MODERATE	46	0	0.025	41	10	0.237	3.5525
Aplan-10C-3676-Thy_vs_Aplan-10C-3676-Tail	chr4	137564430	137564430	C	G	Hspg2	c.11835C>G	p.Arg3945Arg	synonymous_variant	LOW	38	0	0.032	38	14	0.4	4.55068
Aplan-10C-3676-Thy_vs_Aplan-10C-3676-Tail	chr4	137564784	137564784	C	G	Hspg2	c.11986C>G	p.Arg3996Gly	missense_variant	MODERATE	23	0	0.043	19	10	0.526	4.20217
Aplan-10C-3676-Thy_vs_Aplan-10C-3676-Tail	chr4	137564886	137564886	C	G	Hspg2	c.12088C>G	p.Arg4030Gly	missense_variant	MODERATE	29	0	0.038	21	8	0.444	3.42133
Aplan-10C-3676-Thy_vs_Aplan-10C-3676-Tail	chr4	137565870	137565870	C	G	Hspg2	c.12548C>G	p.Pro4183Arg	missense_variant	MODERATE	41	0	0.029	37	11	0.308	3.95894
Aplan-10C-3676-Thy_vs_Aplan-10C-3676-Tail	chr4	137573536	137573536	C	G	Ldlrad2	c.190G>C	p.Val64Leu	missense_variant	MODERATE	47	0	0.027	28	10	0.4	4.80048
Aplan-10C-3676-Thy_vs_Aplan-10C-3676-Tail	chr4	137623321	137623321	C	G	Usp48	c.1693C>G	p.Arg565Gly	missense_variant	MODERATE	38	1	0.061	41	11	0.294	2.45407
Aplan-10C-3676-Thy_vs_Aplan-10C-3676-Tail	chr4	137958133	137958133	C	G	Ece1	c.1933C>G	p.Arg645Gly	missense_variant	MODERATE	64	0	0.019	37	11	0.323	5.26927
Aplan-10C-3676-Thy_vs_Aplan-10C-3676-Tail	chr4	138158415	138158415	C	G	Eif4g3	c.2029C>G	p.Arg677Gly	missense_variant	MODERATE	64	0	0.018	48	19	0.388	6.46644
Aplan-10C-3676-Thy_vs_Aplan-10C-3676-Tail	chr4	138188078	138188078	C	G	Eif4g3	c.3732C>G	p.Ala1244Ala	synonymous_variant	LOW	46	0	0.028	28	12	0.384	5.85813
Aplan-10C-3676-Thy_vs_Aplan-10C-3676-Tail	chr4	138317889	138317889	C	G	Pink1	c.956+7G>C		splice_region_variant&intron_variant	LOW	16	0	0.061	16	6	0.429	1.75267
Aplan-10C-3676-Thy_vs_Aplan-10C-3676-Tail	chr4	138778666	138778666	C	G	Pla2g2d	c.63C>G	p.Leu21Leu	synonymous_variant	LOW	35	0	0.033	33	13	0.448	4.73822
Aplan-10C-3676-Thy_vs_Aplan-10C-3676-Tail	chr4	138778732	138778732	C	G	Pla2g2d	c.129C>G	p.Tyr43*	stop_gained	HIGH	26	0	0.037	48	21	0.448	4.67452
Aplan-10C-3676-Thy_vs_Aplan-10C-3676-Tail	chr4	138909512	138909512	C	G	Otud3	c.337G>C	p.Val113Leu	missense_variant	MODERATE	52	0	0.024	45	10	0.256	3.59574
Aplan-10C-3676-Thy_vs_Aplan-10C-3676-Tail	chr4	139053985	139053985	C	G	Tmco4	c.1459C>G	p.Arg487Gly	missense_variant	MODERATE	25	0	0.048	13	2	0.229	0.954861
Aplan-10C-3676-Thy_vs_Aplan-10C-3676-Tail	chr4	139392057	139392057	C	G	Ubr4	c.546C>G	p.Pro182Pro	synonymous_variant	LOW	95	0	0.012	97	23	0.256	5.77107
Aplan-10C-3676-Thy_vs_Aplan-10C-3676-Tail	chr4	139452702	139452702	C	G	Ubr4	c.10264C>G	p.Arg3422Gly	missense_variant	MODERATE	40	0	0.029	36	11	0.355	3.97921
Aplan-10C-3676-Thy_vs_Aplan-10C-3676-Tail	chr4	139614967	139614967	C	G	Iffo2	c.1339C>G	p.His447Asp	missense_variant	MODERATE	59	0	0.02	52	17	0.349	6.31745
Aplan-10C-3676-Thy_vs_Aplan-10C-3676-Tail	chr4	139659784	139659784	C	G	Tas1r2	c.553C>G	p.Arg185Gly	missense_variant	MODERATE	26	0	0.041	24	13	0.571	5.15279
Aplan-10C-3676-Thy_vs_Aplan-10C-3676-Tail	chr4	139669153	139669153	C	G	Tas1r2	c.1889C>G	p.Thr630Arg	missense_variant	MODERATE	41	0	0.027	30	5	0.214	1.96077
Aplan-10C-3676-Thy_vs_Aplan-10C-3676-Tail	chr4	140067194	140067194	G	A	Igsf21	c.367C>T	p.Arg123*	stop_gained	HIGH	79	0	0.016	64	20	0.316	6.26505
Aplan-10C-3676-Thy_vs_Aplan-10C-3676-Tail	chr4	141328464	141328464	C	G	Epha2	c.2880C>G	p.Ala960Ala	synonymous_variant	LOW	62	0	0.02	44	20	0.428	7.33895
Aplan-10C-3676-Thy_vs_Aplan-10C-3676-Tail	chr4	141414505	141414505	C	G	Clcnkb	c.169G>C	p.Gly57Arg	missense_variant	MODERATE	53	0	0.021	39	13	0.353	5.43916
Aplan-10C-3676-Thy_vs_Aplan-10C-3676-Tail	chr4	141478624	141478624	G	C	Spen	c.2691C>G	p.Leu897Leu	synonymous_variant	LOW	40	0	0.026	44	10	0.243	2.91877
Aplan-10C-3676-Thy_vs_Aplan-10C-3676-Tail	chr4	141621413	141621413	G	C	Slc25a34	c.739C>G	p.Arg247Gly	missense_variant	MODERATE	53	0	0.023	60	16	0.26	4.82873
Aplan-10C-3676-Thy_vs_Aplan-10C-3676-Tail	chr4	144362890	144362890	C	G	Gm13119	c.777C>G	p.Ser259Arg	missense_variant	MODERATE	230	1	0.005487	169	50	0.307	5.91917
Aplan-10C-3676-Thy_vs_Aplan-10C-3676-Tail	chr4	147926176	147926176	C	G	Plod1	c.817G>C	p.Glu273Gln	missense_variant	MODERATE	43	0	0.028	33	10	0.359	4.01336
Aplan-10C-3676-Thy_vs_Aplan-10C-3676-Tail	chr4	147944885	147944885	C	G	2510039O18Rik	c.1311C>G	p.Arg437Arg	synonymous_variant	LOW	42	0	0.028	39	11	0.308	3.85936
Aplan-10C-3676-Thy_vs_Aplan-10C-3676-Tail	chr4	148436185	148436185	C	G	Ubiad1	c.981G>C	p.Leu327Leu	synonymous_variant	LOW	11	0	0.079	17	4	0.277	0.878255
Aplan-10C-3676-Thy_vs_Aplan-10C-3676-Tail	chr4	148436341	148436341	C	G	Ubiad1	c.825G>C	p.Thr275Thr	synonymous_variant	LOW	36	0	0.031	28	5	0.214	1.88975
Aplan-10C-3676-Thy_vs_Aplan-10C-3676-Tail	chr4	150192608	150192608	G	C	Car6	c.593C>G	p.Thr198Arg	missense_variant	MODERATE	23	0	0.048	18	6	0.38	2.38419
Aplan-10C-3676-Thy_vs_Aplan-10C-3676-Tail	chr4	150866327	150866327	C	G	Errfi1	c.211C>G	p.Arg71Gly	missense_variant	MODERATE	50	1	0.043	44	17	0.366	5.22706
Aplan-10C-3676-Thy_vs_Aplan-10C-3676-Tail	chr4	151145247	151145247	G	C	Camta1	c.1127C>G	p.Pro376Arg	missense_variant	MODERATE	48	0	0.024	24	11	0.443	6.08307
Aplan-10C-3676-Thy_vs_Aplan-10C-3676-Tail	chr4	152056134	152056134	C	G	Nol9	c.1785C>G	p.Val595Val	synonymous_variant	LOW	55	0	0.02	43	14	0.334	5.61938
Aplan-10C-3676-Thy_vs_Aplan-10C-3676-Tail	chr4	152106954	152106954	C	G	Plekhg5	c.1243C>G	p.Leu415Val	missense_variant	MODERATE	18	0	0.056	20	5	0.293	1.31914
Aplan-10C-3676-Thy_vs_Aplan-10C-3676-Tail	chr4	152114237	152114237	C	G	Plekhg5	c.2881C>G	p.Arg961Gly	missense_variant	MODERATE	47	0	0.023	29	9	0.345	4.15306
Aplan-10C-3676-Thy_vs_Aplan-10C-3676-Tail	chr4	154281835	154281835	C	G	Arhgef16	c.1474G>C	p.Gly492Arg	missense_variant	MODERATE	86	0	0.014	64	19	0.333	6.24077
Aplan-10C-3676-Thy_vs_Aplan-10C-3676-Tail	chr4	154328729	154328729	C	G	Prdm16	c.3044G>C	p.Arg1015Pro	missense_variant	MODERATE	27	0	0.043	25	6	0.25	2.06053
Aplan-10C-3676-Thy_vs_Aplan-10C-3676-Tail	chr4	154341788	154341788	C	G	Prdm16	c.1539G>C	p.Pro513Pro	synonymous_variant	LOW	25	0	0.043	34	13	0.419	3.56185
Aplan-10C-3676-Thy_vs_Aplan-10C-3676-Tail	chr4	154666955	154666955	C	G	Actrt2	c.723G>C	p.Glu241Asp	missense_variant	MODERATE	27	0	0.038	33	8	0.259	2.20107
Aplan-10C-3676-Thy_vs_Aplan-10C-3676-Tail	chr4	154667540	154667540	C	G	Actrt2	c.138G>C	p.Ala46Ala	synonymous_variant	LOW	52	0	0.022	32	12	0.375	5.69934
Aplan-10C-3676-Thy_vs_Aplan-10C-3676-Tail	chr4	155841473	155841473	C	G	Mxra8	c.402C>G	p.Tyr134*	stop_gained	HIGH	91	2	0.027	72	23	0.339	6.75686
Aplan-10C-3676-Thy_vs_Aplan-10C-3676-Tail	chr4	156231625	156231625	C	A	Klhl17	c.1271G>T	p.Arg424Leu	missense_variant	MODERATE	49	0	0.025	33	9	0.31	3.88073
Aplan-10C-3676-Thy_vs_Aplan-10C-3676-Tail	chr5	6771611	6771611	C	A	Zfp804b	c.1451G>T	p.Arg484Leu	missense_variant	MODERATE	140	1	0.008262	96	26	0.267	6.06036
Aplan-10C-3676-Thy_vs_Aplan-10C-3676-Tail	chr5	8397861	8397861	G	C	Dbf4	c.1348C>G	p.Arg450Gly	missense_variant	MODERATE	123	0	0.00896	94	29	0.312	6.06687
Aplan-10C-3676-Thy_vs_Aplan-10C-3676-Tail	chr5	8825176	8825176	G	C	Abcb1b	c.1615G>C	p.Ala539Pro	missense_variant	MODERATE	66	0	0.018	35	12	0.323	6.15489
Aplan-10C-3676-Thy_vs_Aplan-10C-3676-Tail	chr5	8988246	8988246	G	C	Crot	c.280C>G	p.Arg94Gly	missense_variant	MODERATE	70	0	0.018	48	19	0.384	6.89687
Aplan-10C-3676-Thy_vs_Aplan-10C-3676-Tail	chr5	20886412	20886412	C	G	Tmem60	c.174C>G	p.Ala58Ala	synonymous_variant	LOW	133	0	0.008092	100	34	0.34	6.07371
Aplan-10C-3676-Thy_vs_Aplan-10C-3676-Tail	chr5	23748764	23748764	G	C	Pus7	c.1332C>G	p.Pro444Pro	synonymous_variant	LOW	49	2	0.026	49	12	0.241	2.12603
Aplan-10C-3676-Thy_vs_Aplan-10C-3676-Tail	chr5	24366801	24366801	G	C	Nos3	c.206G>C	p.Arg69Pro	missense_variant	MODERATE	55	0	0.022	32	6	0.234	2.74606
Aplan-10C-3676-Thy_vs_Aplan-10C-3676-Tail	chr5	25258855	25258855	G	C	Galnt11	c.1124G>C	p.Arg375Thr	missense_variant	MODERATE	46	0	0.025	38	12	0.304	4.62049
Aplan-10C-3676-Thy_vs_Aplan-10C-3676-Tail	chr5	28076799	28076799	G	C	Insig1	c.759G>C	p.Pro253Pro	synonymous_variant	LOW	116	0	0.011	97	31	0.325	6.09809
Aplan-10C-3676-Thy_vs_Aplan-10C-3676-Tail	chr5	30119907	30119907	G	C	Hadha	c.2200C>G	p.Arg734Gly	missense_variant	MODERATE	65	0	0.017	56	15	0.3	5.52145
Aplan-10C-3676-Thy_vs_Aplan-10C-3676-Tail	chr5	30134095	30134095	G	C	Hadha	c.881C>G	p.Thr294Ser	missense_variant	MODERATE	116	0	0.011	82	26	0.316	6.39594
Aplan-10C-3676-Thy_vs_Aplan-10C-3676-Tail	chr5	30385286	30385286	G	C	Otof	c.1917C>G	p.Tyr639*	stop_gained	HIGH	38	0	0.029	41	10	0.29	2.95612
Aplan-10C-3676-Thy_vs_Aplan-10C-3676-Tail	chr5	30654742	30654742	C	A	Slc35f6	c.78-6C>A		splice_region_variant&intron_variant	LOW	22	0	0.053	12	2	0.298	0.929419
Aplan-10C-3676-Thy_vs_Aplan-10C-3676-Tail	chr5	30871745	30871745	G	C	Tmem214	c.527G>C	p.Arg176Pro	missense_variant	MODERATE	48	0	0.022	38	11	0.286	4.30815
Aplan-10C-3676-Thy_vs_Aplan-10C-3676-Tail	chr5	31257518	31257518	G	C	Ift172	c.4159C>G	p.Arg1387Gly	missense_variant&splice_region_variant	MODERATE	89	1	0.029	83	32	0.376	6.4269
Aplan-10C-3676-Thy_vs_Aplan-10C-3676-Tail	chr5	31263362	31263362	G	C	Ift172	c.3228+4C>G		splice_region_variant&intron_variant	LOW	82	0	0.015	51	15	0.311	6.88161
Aplan-10C-3676-Thy_vs_Aplan-10C-3676-Tail	chr5	32822110	32822110	G	C	Prr14l	c.5221C>G	p.Pro1741Ala	missense_variant	MODERATE	80	0	0.015	50	13	0.255	5.86757
Aplan-10C-3676-Thy_vs_Aplan-10C-3676-Tail	chr5	32944994	32944994	G	C	Depdc5	c.2843G>C	p.Arg948Pro	missense_variant	MODERATE	92	0	0.014	107	34	0.315	6.10953
Aplan-10C-3676-Thy_vs_Aplan-10C-3676-Tail	chr5	33159120	33159120	G	C	Slc5a1	c.1709G>C	p.Arg570Pro	missense_variant	MODERATE	53	0	0.024	55	16	0.292	5.05744
Aplan-10C-3676-Thy_vs_Aplan-10C-3676-Tail	chr5	33645547	33645547	G	C	Slbp	c.432C>G	p.Tyr144*	stop_gained	HIGH	84	0	0.015	87	25	0.294	6.51999
Aplan-10C-3676-Thy_vs_Aplan-10C-3676-Tail	chr5	34559435	34559435	C	G	Sh3bp2	c.1189C>G	p.Arg397Gly	missense_variant	MODERATE	75	0	0.015	47	11	0.263	4.90617
Aplan-10C-3676-Thy_vs_Aplan-10C-3676-Tail	chr5	35075408	35075408	G	C	Dok7	c.527G>C	p.Arg176Pro	missense_variant	MODERATE	41	0	0.028	38	11	0.322	3.87564
Aplan-10C-3676-Thy_vs_Aplan-10C-3676-Tail	chr5	35706033	35706033	G	C	Sh3tc1	c.2809C>G	p.Arg937Gly	missense_variant	MODERATE	28	0	0.038	12	7	0.572	4.3718
Aplan-10C-3676-Thy_vs_Aplan-10C-3676-Tail	chr5	36026711	36026711	G	C	Sorcs2	c.2930C>G	p.Thr977Ser	missense_variant	MODERATE	18	0	0.053	19	6	0.294	1.7065
Aplan-10C-3676-Thy_vs_Aplan-10C-3676-Tail	chr5	41817946	41817946	G	C	Bod1l	c.6024C>G	p.Cys2008Trp	missense_variant	MODERATE	122	0	0.009334	117	33	0.293	6.03808
Aplan-10C-3676-Thy_vs_Aplan-10C-3676-Tail	chr5	44006165	44006165	G	C	Prom1	c.2286C>G	p.Ala762Ala	splice_region_variant&synonymous_variant	LOW	86	0	0.014	85	26	0.33	6.01065
Aplan-10C-3676-Thy_vs_Aplan-10C-3676-Tail	chr5	48182301	48182301	C	G	Slit2	c.523C>G	p.Arg175Gly	missense_variant	MODERATE	65	0	0.019	53	21	0.367	6.10878
Aplan-10C-3676-Thy_vs_Aplan-10C-3676-Tail	chr5	64127783	64127783	G	C	Pgm1	c.1767G>C	p.Pro589Pro	synonymous_variant	LOW	76	1	0.03	89	26	0.286	6.06379
Aplan-10C-3676-Thy_vs_Aplan-10C-3676-Tail	chr5	65375701	65375701	G	C	Klb	c.1352G>C	p.Arg451Pro	missense_variant	MODERATE	92	0	0.013	59	14	0.237	6.17157
Aplan-10C-3676-Thy_vs_Aplan-10C-3676-Tail	chr5	65424123	65424123	G	A	Ugdh	c.183C>T	p.Val61Val	synonymous_variant	LOW	134	0	0.009373	91	33	0.346	6.42799
Aplan-10C-3676-Thy_vs_Aplan-10C-3676-Tail	chr5	65971213	65971213	G	C	Chrna9	c.763G>C	p.Ala255Pro	missense_variant	MODERATE	48	0	0.021	47	16	0.312	5.56482
Aplan-10C-3676-Thy_vs_Aplan-10C-3676-Tail	chr5	66026699	66026699	G	C	Rbm47	c.560C>G	p.Ala187Gly	missense_variant	MODERATE	48	0	0.023	34	12	0.348	5.17922
Aplan-10C-3676-Thy_vs_Aplan-10C-3676-Tail	chr5	66391646	66391646	T	G	Apbb2	c.1232A>C	p.Asn411Thr	missense_variant	MODERATE	154	0	0.007756	116	29	0.256	5.92435
Aplan-10C-3676-Thy_vs_Aplan-10C-3676-Tail	chr5	76858341	76858341	G	C	C530008M17Rik	c.2548G>C	p.Gly850Arg	missense_variant	MODERATE	36	0	0.031	51	17	0.386	4.34699
Aplan-10C-3676-Thy_vs_Aplan-10C-3676-Tail	chr5	76858377	76858377	G	C	C530008M17Rik	c.2584G>C	p.Val862Leu	missense_variant	MODERATE	36	0	0.028	48	18	0.391	4.77473
Aplan-10C-3676-Thy_vs_Aplan-10C-3676-Tail	chr5	76858500	76858500	G	C	C530008M17Rik	c.2707G>C	p.Ala903Pro	missense_variant	MODERATE	53	0	0.021	55	24	0.429	6.67395
Aplan-10C-3676-Thy_vs_Aplan-10C-3676-Tail	chr5	76858629	76858629	G	C	C530008M17Rik	c.2836G>C	p.Ala946Pro	missense_variant	MODERATE	45	0	0.024	40	16	0.386	6.09756
Aplan-10C-3676-Thy_vs_Aplan-10C-3676-Tail	chr5	76896485	76896485	C	G	Aasdh	c.557G>C	p.Arg186Pro	missense_variant	MODERATE	47	0	0.025	39	8	0.235	2.93573
Aplan-10C-3676-Thy_vs_Aplan-10C-3676-Tail	chr5	76916027	76916027	C	G	Ppat	c.1275G>C	p.Pro425Pro	synonymous_variant	LOW	137	0	0.009041	101	45	0.437	5.88541
Aplan-10C-3676-Thy_vs_Aplan-10C-3676-Tail	chr5	86033688	86033688	C	G	Cenpc1	c.1817G>C	p.Arg606Pro	missense_variant	MODERATE	82	0	0.014	72	23	0.328	6.69712
Aplan-10C-3676-Thy_vs_Aplan-10C-3676-Tail	chr5	86289233	86289233	C	G	Tmprss11c	c.28G>C	p.Glu10Gln	missense_variant	MODERATE	79	0	0.015	58	24	0.42	5.96123
Aplan-10C-3676-Thy_vs_Aplan-10C-3676-Tail	chr5	92259592	92259592	G	C	Naaa	c.1053C>G	p.Pro351Pro	synonymous_variant	LOW	101	0	0.012	90	34	0.358	6.1113
Aplan-10C-3676-Thy_vs_Aplan-10C-3676-Tail	chr5	103867585	103867585	G	C	Klhl8	c.1472C>G	p.Pro491Arg	missense_variant	MODERATE	60	0	0.019	50	22	0.419	6.61981
Aplan-10C-3676-Thy_vs_Aplan-10C-3676-Tail	chr5	105288963	105288963	G	C	Gbp6	c.276C>G	p.Val92Val	synonymous_variant	LOW	156	0	0.007289	132	58	0.439	5.81956
Aplan-10C-3676-Thy_vs_Aplan-10C-3676-Tail	chr5	106902089	106902089	G	C	Hfm1	c.1213C>G	p.Arg405Gly	missense_variant	MODERATE	134	0	0.009499	140	57	0.402	5.86935
Aplan-10C-3676-Thy_vs_Aplan-10C-3676-Tail	chr5	107413051	107413051	G	C	Ephx4	c.347G>C	p.Ser116Thr	missense_variant	MODERATE	157	0	0.008218	89	36	0.382	6.08701
Aplan-10C-3676-Thy_vs_Aplan-10C-3676-Tail	chr5	108673695	108673695	G	C	Slc26a1	c.375C>G	p.Asn125Lys	missense_variant	MODERATE	49	0	0.023	37	7	0.2	2.71759
Aplan-10C-3676-Thy_vs_Aplan-10C-3676-Tail	chr5	113942738	113942738	G	C	Ssh1	c.2630C>G	p.Ser877Trp	missense_variant	MODERATE	35	0	0.03	24	6	0.28	2.52473
Aplan-10C-3676-Thy_vs_Aplan-10C-3676-Tail	chr5	114195676	114195676	G	C	Acacb	c.1659G>C	p.Ala553Ala	synonymous_variant	LOW	35	0	0.031	29	8	0.346	3.01335
Aplan-10C-3676-Thy_vs_Aplan-10C-3676-Tail	chr5	114203449	114203449	C	G	Acacb	c.2511C>G	p.Ile837Met	missense_variant	MODERATE	28	0	0.048	29	5	0.217	1.28538
Aplan-10C-3676-Thy_vs_Aplan-10C-3676-Tail	chr5	114622786	114622786	C	G	Trpv4	c.2483G>C	p.Arg828Pro	missense_variant	MODERATE	63	0	0.019	49	15	0.351	5.99838
Aplan-10C-3676-Thy_vs_Aplan-10C-3676-Tail	chr5	114904958	114904958	G	C	Oasl2	c.790G>C	p.Val264Leu	missense_variant	MODERATE	58	0	0.023	39	14	0.419	6.2681
Aplan-10C-3676-Thy_vs_Aplan-10C-3676-Tail	chr5	114970602	114970602	G	C	Hnf1a	c.243C>G	p.Phe81Leu	missense_variant	MODERATE	29	0	0.036	35	14	0.44	4.30017
Aplan-10C-3676-Thy_vs_Aplan-10C-3676-Tail	chr5	115272279	115272279	G	C	Rnf10	c.135C>G	p.Ala45Ala	synonymous_variant	LOW	16	0	0.077	8	3	0.429	1.55802
Aplan-10C-3676-Thy_vs_Aplan-10C-3676-Tail	chr5	115643601	115643601	C	G	Rab35	c.379C>G	p.Arg127Gly	missense_variant	MODERATE	72	0	0.016	53	15	0.29	6.16145
Aplan-10C-3676-Thy_vs_Aplan-10C-3676-Tail	chr5	120694973	120694973	G	C	Dtx1	c.399C>G	p.Tyr133*	stop_gained	HIGH	24	0	0.043	18	6	0.355	2.45114
Aplan-10C-3676-Thy_vs_Aplan-10C-3676-Tail	chr5	122129730	122129730	C	G	Ccdc63	c.172G>C	p.Gly58Arg	missense_variant	MODERATE	42	0	0.026	32	9	0.266	3.59554
Aplan-10C-3676-Thy_vs_Aplan-10C-3676-Tail	chr5	122257521	122257521	G	A	Tctn1	c.585C>T	p.Ser195Ser	synonymous_variant	LOW	62	0	0.02	57	24	0.391	5.92097
Aplan-10C-3676-Thy_vs_Aplan-10C-3676-Tail	chr5	122868100	122868100	C	G	Rnf34	c.1004C>G	p.Ala335Gly	missense_variant	MODERATE	42	1	0.051	35	19	0.484	6.33074
Aplan-10C-3676-Thy_vs_Aplan-10C-3676-Tail	chr5	123700955	123700955	G	C	Zcchc8	c.1519C>G	p.Arg507Gly	missense_variant	MODERATE	22	0	0.045	10	3	0.337	1.6163
Aplan-10C-3676-Thy_vs_Aplan-10C-3676-Tail	chr5	125010468	125010468	G	C	Fam101a	c.268G>C	p.Ala90Pro	missense_variant	MODERATE	72	0	0.017	63	14	0.25	5.00852
Aplan-10C-3676-Thy_vs_Aplan-10C-3676-Tail	chr5	128268547	128268547	G	C	Tmem132d	c.910C>G	p.Leu304Val	missense_variant	MODERATE	34	0	0.033	8	3	0.4	2.31175
Aplan-10C-3676-Thy_vs_Aplan-10C-3676-Tail	chr5	130016171	130016171	G	C	Asl	c.528C>G	p.His176Gln	missense_variant	MODERATE	57	0	0.02	51	15	0.311	5.43874
Aplan-10C-3676-Thy_vs_Aplan-10C-3676-Tail	chr5	134135305	134135305	C	G	Gatsl2	c.339C>G	p.Ser113Ser	synonymous_variant	LOW	58	0	0.02	43	17	0.425	7.27841
Aplan-10C-3676-Thy_vs_Aplan-10C-3676-Tail	chr5	134627631	134627631	C	G	Eif4h	c.204G>C	p.Arg68Arg	synonymous_variant	LOW	53	0	0.022	53	13	0.244	3.97573
Aplan-10C-3676-Thy_vs_Aplan-10C-3676-Tail	chr5	136060271	136060271	G	C	Upk3bl	c.445G>C	p.Gly149Arg	missense_variant	MODERATE	15	0	0.071	12	3	0.307	1.1237
Aplan-10C-3676-Thy_vs_Aplan-10C-3676-Tail	chr5	137291012	137291012	C	G	Ache	c.979C>G	p.Arg327Gly	missense_variant	MODERATE	50	0	0.023	37	10	0.294	4.06015
Aplan-10C-3676-Thy_vs_Aplan-10C-3676-Tail	chr5	137644466	137644466	G	C	Irs3	c.709C>G	p.Arg237Gly	missense_variant	MODERATE	21	0	0.049	22	6	0.317	1.6749
Aplan-10C-3676-Thy_vs_Aplan-10C-3676-Tail	chr5	139814100	139814100	C	G	Tmem184a	c.25G>C	p.Glu9Gln	missense_variant	MODERATE	30	0	0.039	25	10	0.35	3.95172
Aplan-10C-3676-Thy_vs_Aplan-10C-3676-Tail	chr5	142569466	142569466	C	G	Mmd2	c.470G>C	p.Arg157Pro	missense_variant&splice_region_variant	MODERATE	38	0	0.03	37	6	0.2	1.93759
Aplan-10C-3676-Thy_vs_Aplan-10C-3676-Tail	chr5	142886458	142886458	G	C	Fbxl18	c.829C>G	p.Arg277Gly	missense_variant	MODERATE	14	0	0.067	19	7	0.333	1.89969
Aplan-10C-3676-Thy_vs_Aplan-10C-3676-Tail	chr5	142904700	142904700	G	C	Actb	c.446C>G	p.Thr149Arg	missense_variant	MODERATE	27	0	0.041	19	5	0.286	2.07145
Aplan-10C-3676-Thy_vs_Aplan-10C-3676-Tail	chr5	143176475	143176475	G	C	Rbak	c.132C>G	p.Leu44Leu	synonymous_variant	LOW	84	0	0.014	44	11	0.282	5.50146
Aplan-10C-3676-Thy_vs_Aplan-10C-3676-Tail	chr5	144842583	144842583	G	A	Trrap	c.9358G>A	p.Asp3120Asn	missense_variant	MODERATE	12	0	0.083	14	5	0.364	1.37187
Aplan-10C-3676-Thy_vs_Aplan-10C-3676-Tail	chr5	147599663	147599663	G	C	Flt1	c.2367C>G	p.Ser789Ser	synonymous_variant	LOW	51	0	0.023	26	9	0.374	4.71291
Aplan-10C-3676-Thy_vs_Aplan-10C-3676-Tail	chr5	147683848	147683848	G	C	Flt1	c.485C>G	p.Thr162Arg	missense_variant	MODERATE	48	1	0.025	43	19	0.475	6.06608
Aplan-10C-3676-Thy_vs_Aplan-10C-3676-Tail	chr5	149456905	149456905	G	C	Tex26	c.400G>C	p.Ala134Pro	missense_variant	MODERATE	90	0	0.014	57	19	0.333	7.11025
Aplan-10C-3676-Thy_vs_Aplan-10C-3676-Tail	chr5	150457910	150457910	G	C	Fry	c.7435G>C	p.Gly2479Arg	missense_variant	MODERATE	33	0	0.041	39	11	0.303	3.20859
Aplan-10C-3676-Thy_vs_Aplan-10C-3676-Tail	chr6	18388082	18388082	G	C	Cttnbp2	c.3789C>G	p.Cys1263Trp	missense_variant	MODERATE	62	0	0.019	41	10	0.272	4.32311
Aplan-10C-3676-Thy_vs_Aplan-10C-3676-Tail	chr6	21217372	21217372	G	C	Kcnd2	c.1074G>C	p.Pro358Pro	synonymous_variant	LOW	61	0	0.019	50	21	0.372	6.18645
Aplan-10C-3676-Thy_vs_Aplan-10C-3676-Tail	chr6	39349419	39349419	G	C	Slc37a3	c.803C>G	p.Ser268Trp	missense_variant	MODERATE	37	0	0.031	21	9	0.392	4.55906
Aplan-10C-3676-Thy_vs_Aplan-10C-3676-Tail	chr6	40577984	40577984	G	C	Clec5a	c.555C>G	p.Cys185Trp	missense_variant	MODERATE	145	0	0.008797	91	34	0.351	6.28054
Aplan-10C-3676-Thy_vs_Aplan-10C-3676-Tail	chr6	48620164	48620164	G	C	Zfp775	c.971G>C	p.Arg324Thr	missense_variant	MODERATE	33	0	0.036	26	6	0.28	2.2916
Aplan-10C-3676-Thy_vs_Aplan-10C-3676-Tail	chr6	48620195	48620195	G	C	Zfp775	c.1002G>C	p.Pro334Pro	synonymous_variant	LOW	32	0	0.036	19	4	0.235	1.80938
Aplan-10C-3676-Thy_vs_Aplan-10C-3676-Tail	chr6	49105679	49105679	G	C	Igf2bp3	c.968C>G	p.Pro323Arg	missense_variant	MODERATE	57	0	0.019	66	25	0.393	6.23335
Aplan-10C-3676-Thy_vs_Aplan-10C-3676-Tail	chr6	51909372	51909372	G	A	Skap2	c.522C>T	p.Asn174Asn	synonymous_variant	LOW	153	0	0.007885	190	44	0.238	5.98928
Aplan-10C-3676-Thy_vs_Aplan-10C-3676-Tail	chr6	64063928	64063928	C	G	Grid2	c.853C>G	p.Arg285Gly	missense_variant	MODERATE	72	0	0.017	67	19	0.315	5.92049
Aplan-10C-3676-Thy_vs_Aplan-10C-3676-Tail	chr6	71510001	71510001	G	C	Rnf103	c.1615G>C	p.Asp539His	missense_variant	MODERATE	149	0	0.007174	151	67	0.468	5.77661
Aplan-10C-3676-Thy_vs_Aplan-10C-3676-Tail	chr6	72843025	72843025	G	C	Kcmf1	c.990C>G	p.Arg330Arg	synonymous_variant	LOW	69	0	0.017	57	12	0.2	4.43977
Aplan-10C-3676-Thy_vs_Aplan-10C-3676-Tail	chr6	83195572	83195572	G	C	Dctn1	c.2911G>C	p.Val971Leu	missense_variant	MODERATE	12	0	0.083	22	5	0.263	0.864478
Aplan-10C-3676-Thy_vs_Aplan-10C-3676-Tail	chr6	87082552	87082552	G	A	Gfpt1	c.1508G>A	p.Arg503His	missense_variant	MODERATE	93	0	0.013	63	19	0.302	6.69571
Aplan-10C-3676-Thy_vs_Aplan-10C-3676-Tail	chr6	87433803	87433803	G	T	Bmp10	c.577G>T	p.Gly193*	stop_gained	HIGH	49	0	0.021	56	16	0.31	4.84249
Aplan-10C-3676-Thy_vs_Aplan-10C-3676-Tail	chr6	87933397	87933397	C	G	Hmces	c.788C>G	p.Pro263Arg	missense_variant	MODERATE	64	0	0.019	61	11	0.231	3.6469
Aplan-10C-3676-Thy_vs_Aplan-10C-3676-Tail	chr6	90474176	90474176	C	G	Klf15	c.1136C>G	p.Pro379Arg	missense_variant	MODERATE	28	0	0.045	15	4	0.312	1.95622
Aplan-10C-3676-Thy_vs_Aplan-10C-3676-Tail	chr6	108664488	108664488	C	G	Bhlhe40	c.392C>G	p.Ser131Trp	missense_variant	MODERATE	104	2	0.023	88	28	0.338	5.87079
Aplan-10C-3676-Thy_vs_Aplan-10C-3676-Tail	chr6	113774245	113774245	G	C	Atp2b2	c.1726C>G	p.Arg576Gly	missense_variant	MODERATE	16	0	0.059	12	3	0.308	1.17292
Aplan-10C-3676-Thy_vs_Aplan-10C-3676-Tail	chr6	114777040	114777040	C	G	Atg7	c.2154C>G	p.Thr718Thr	synonymous_variant	LOW	76	0	0.015	67	12	0.21	4.19972
Aplan-10C-3676-Thy_vs_Aplan-10C-3676-Tail	chr6	115820038	115820038	C	G	Efcab12	c.1147+7G>C		splice_region_variant&intron_variant	LOW	17	0	0.059	19	4	0.22	0.973855
Aplan-10C-3676-Thy_vs_Aplan-10C-3676-Tail	chr6	116626901	116626901	G	C	Zfp422	c.136C>G	p.Arg46Gly	missense_variant	MODERATE	94	0	0.012	80	30	0.368	5.96263
Aplan-10C-3676-Thy_vs_Aplan-10C-3676-Tail	chr6	118433309	118433309	G	C	Zfp248	c.138C>G	p.Ser46Ser	synonymous_variant	LOW	62	0	0.018	58	15	0.294	5.20138
Aplan-10C-3676-Thy_vs_Aplan-10C-3676-Tail	chr6	119320708	119320708	C	G	Lrtm2	c.371G>C	p.Arg124Pro	missense_variant	MODERATE	50	0	0.021	34	16	0.448	7.4621
Aplan-10C-3676-Thy_vs_Aplan-10C-3676-Tail	chr6	120406658	120406658	G	C	Kdm5a	c.2359G>C	p.Ala787Pro	missense_variant	MODERATE	38	0	0.031	61	17	0.326	3.78071
Aplan-10C-3676-Thy_vs_Aplan-10C-3676-Tail	chr6	120757650	120757650	C	G	Cecr2	c.1885C>G	p.Pro629Ala	missense_variant	MODERATE	58	0	0.02	60	32	0.51	6.06689
Aplan-10C-3676-Thy_vs_Aplan-10C-3676-Tail	chr6	121187404	121187404	C	G	Pex26	c.505C>G	p.Arg169Gly	missense_variant	MODERATE	13	0	0.067	14	4	0.307	1.00976
Aplan-10C-3676-Thy_vs_Aplan-10C-3676-Tail	chr6	121383924	121383924	G	C	Iqsec3	c.2974C>G	p.Arg992Gly	missense_variant	MODERATE	33	0	0.038	29	7	0.208	2.49844
Aplan-10C-3676-Thy_vs_Aplan-10C-3676-Tail	chr6	121389469	121389469	C	G	Iqsec3	c.2453G>C	p.Arg818Pro	missense_variant&splice_region_variant	MODERATE	47	0	0.024	40	21	0.5	6.59717
Aplan-10C-3676-Thy_vs_Aplan-10C-3676-Tail	chr6	124404139	124404139	C	G	Pex5	c.750G>C	p.Gln250His	missense_variant	MODERATE	72	0	0.017	51	25	0.439	6.51988
Aplan-10C-3676-Thy_vs_Aplan-10C-3676-Tail	chr6	124438396	124438396	C	G	Clstn3	c.2119G>C	p.Gly707Arg	missense_variant	MODERATE	71	0	0.016	53	28	0.51	6.31449
Aplan-10C-3676-Thy_vs_Aplan-10C-3676-Tail	chr6	124459240	124459240	C	G	Clstn3	c.660G>C	p.Ala220Ala	synonymous_variant	LOW	67	0	0.019	92	39	0.449	6.24325
Aplan-10C-3676-Thy_vs_Aplan-10C-3676-Tail	chr6	124459297	124459297	C	G	Clstn3	c.603G>C	p.Glu201Asp	missense_variant	MODERATE	73	0	0.018	91	41	0.465	5.93551
Aplan-10C-3676-Thy_vs_Aplan-10C-3676-Tail	chr6	124508495	124508495	C	G	C1rl	c.824C>G	p.Thr275Arg	missense_variant	MODERATE	99	1	0.023	93	38	0.395	6.31165
Aplan-10C-3676-Thy_vs_Aplan-10C-3676-Tail	chr6	124778302	124778302	G	C	Lrrc23	c.271C>G	p.Arg91Gly	missense_variant	MODERATE	24	0	0.04	19	5	0.285	1.91794
Aplan-10C-3676-Thy_vs_Aplan-10C-3676-Tail	chr6	125049957	125049957	C	G	Acrbp	c.-53C>G		5_prime_UTR_premature_start_codon_gain_variant	LOW	45	0	0.026	43	11	0.258	3.74541
Aplan-10C-3676-Thy_vs_Aplan-10C-3676-Tail	chr6	125050520	125050520	C	G	Acrbp	c.130C>G	p.Arg44Gly	missense_variant	MODERATE	43	0	0.027	43	9	0.223	2.61037
Aplan-10C-3676-Thy_vs_Aplan-10C-3676-Tail	chr6	125168866	125168866	C	G	Ncapd2	c.3931G>C	p.Ala1311Pro	missense_variant	MODERATE	35	0	0.03	25	4	0.203	1.586
Aplan-10C-3676-Thy_vs_Aplan-10C-3676-Tail	chr6	125635689	125635689	G	C	Vwf	c.3102G>C	p.Thr1034Thr	synonymous_variant	LOW	75	0	0.015	56	14	0.274	5.62499
Aplan-10C-3676-Thy_vs_Aplan-10C-3676-Tail	chr6	125642941	125642941	C	G	Vwf	c.4581C>G	p.Arg1527Arg	synonymous_variant	LOW	52	0	0.021	43	14	0.308	5.41628
Aplan-10C-3676-Thy_vs_Aplan-10C-3676-Tail	chr6	125643056	125643056	C	G	Vwf	c.4696C>G	p.Arg1566Gly	missense_variant	MODERATE	59	0	0.019	42	16	0.378	6.98246
Aplan-10C-3676-Thy_vs_Aplan-10C-3676-Tail	chr6	126533371	126533371	C	G	Kcna5	c.1793G>C	p.Arg598Pro	missense_variant	MODERATE	74	0	0.015	76	23	0.318	5.94099
Aplan-10C-3676-Thy_vs_Aplan-10C-3676-Tail	chr6	128325064	128325064	G	C	Tulp3	c.993C>G	p.Leu331Leu	synonymous_variant	LOW	110	0	0.011	97	23	0.253	6.46977
Aplan-10C-3676-Thy_vs_Aplan-10C-3676-Tail	chr6	129020490	129020490	C	G	Clec2f	c.598C>G	p.Arg200Gly	missense_variant	MODERATE	50	0	0.022	56	19	0.314	5.99231
Aplan-10C-3676-Thy_vs_Aplan-10C-3676-Tail	chr6	129363933	129363933	C	G	Clec12a	c.675C>G	p.Cys225Trp	missense_variant	MODERATE	109	0	0.012	95	27	0.276	6.44988
Aplan-10C-3676-Thy_vs_Aplan-10C-3676-Tail	chr6	129703504	129703504	G	C	Klri1	c.310+4C>G		splice_region_variant&intron_variant	LOW	91	0	0.013	93	27	0.289	5.93451
Aplan-10C-3676-Thy_vs_Aplan-10C-3676-Tail	chr6	134718415	134718415	G	C	Dusp16	c.1452C>G	p.Thr484Thr	synonymous_variant	LOW	55	0	0.019	67	16	0.258	4.32441
Aplan-10C-3676-Thy_vs_Aplan-10C-3676-Tail	chr6	135016609	135016609	C	G	Ddx47	c.589C>G	p.Arg197Gly	missense_variant	MODERATE	127	0	0.009694	98	44	0.454	6.025
Aplan-10C-3676-Thy_vs_Aplan-10C-3676-Tail	chr6	135733734	135733734	C	G	Grin2b	c.2813G>C	p.Arg938Pro	missense_variant	MODERATE	89	1	0.028	75	27	0.344	6.4648
Aplan-10C-3676-Thy_vs_Aplan-10C-3676-Tail	chr6	136401392	136401392	C	G	E330021D16Rik	c.439G>C	p.Gly147Arg	missense_variant	MODERATE	130	0	0.00861	158	66	0.415	5.65246
Aplan-10C-3676-Thy_vs_Aplan-10C-3676-Tail	chr6	136635596	136635596	C	G	Plbd1	c.598G>C	p.Val200Leu	missense_variant	MODERATE	57	0	0.019	55	15	0.298	5.12028
Aplan-10C-3676-Thy_vs_Aplan-10C-3676-Tail	chr6	136651750	136651750	C	G	Plbd1	c.319G>C	p.Glu107Gln	missense_variant	MODERATE	21	0	0.056	25	8	0.311	2.3076
Aplan-10C-3676-Thy_vs_Aplan-10C-3676-Tail	chr6	136737437	136737437	G	A	Gucy2c	c.1390C>T	p.Arg464*	stop_gained	HIGH	47	0	0.025	56	16	0.289	4.42067
Aplan-10C-3676-Thy_vs_Aplan-10C-3676-Tail	chr6	136767170	136767170	C	G	Gucy2c	c.430G>C	p.Ala144Pro	missense_variant	MODERATE	76	0	0.015	95	30	0.305	6.54736
Aplan-10C-3676-Thy_vs_Aplan-10C-3676-Tail	chr6	141471139	141471139	C	G	Pde3a	c.1738C>G	p.Pro580Ala	missense_variant	MODERATE	24	0	0.053	23	6	0.291	2.02681
Aplan-10C-3676-Thy_vs_Aplan-10C-3676-Tail	chr6	142625950	142625950	G	A	Abcc9	c.3451C>T	p.Arg1151Trp	missense_variant	MODERATE	61	0	0.02	79	17	0.209	4.50915
Aplan-10C-3676-Thy_vs_Aplan-10C-3676-Tail	chr6	145004379	145004379	C	G	Bcat1	c.1292G>C	p.Arg431Pro	missense_variant	MODERATE	37	0	0.031	33	9	0.259	3.22692
Aplan-10C-3676-Thy_vs_Aplan-10C-3676-Tail	chr6	145232194	145232194	C	G	Kras	c.351G>C	p.Lys117Asn	missense_variant	MODERATE	56	0	0.02	55	21	0.378	7.02582
Aplan-10C-3676-Thy_vs_Aplan-10C-3676-Tail	chr6	146190608	146190608	G	C	Itpr2	c.6491C>G	p.Pro2164Arg	missense_variant	MODERATE	41	0	0.031	50	13	0.28	3.71158
Aplan-10C-3676-Thy_vs_Aplan-10C-3676-Tail	chr6	146371307	146371307	C	G	Itpr2	c.2686G>C	p.Val896Leu	missense_variant	MODERATE	41	0	0.029	53	17	0.375	4.74448
Aplan-10C-3676-Thy_vs_Aplan-10C-3676-Tail	chr7	5008504	5008504	G	A	Fiz1	c.1014C>T	p.Cys338Cys	synonymous_variant	LOW	36	0	0.03	20	9	0.429	4.65423
Aplan-10C-3676-Thy_vs_Aplan-10C-3676-Tail	chr7	6480362	6480362	G	C	Olfr5	c.793C>G	p.Arg265Gly	missense_variant	MODERATE	99	0	0.011	86	23	0.288	6.55134
Aplan-10C-3676-Thy_vs_Aplan-10C-3676-Tail	chr7	15989420	15989420	G	C	Gltscr1	c.171C>G	p.Ala57Ala	synonymous_variant	LOW	12	0	0.07	14	5	0.385	1.37187
Aplan-10C-3676-Thy_vs_Aplan-10C-3676-Tail	chr7	16811637	16811637	C	G	Fkrp	c.299G>C	p.Arg100Pro	missense_variant	MODERATE	25	0	0.04	26	6	0.274	1.64555
Aplan-10C-3676-Thy_vs_Aplan-10C-3676-Tail	chr7	16833201	16833201	C	G	Strn4	c.1469C>G	p.Pro490Arg	missense_variant	MODERATE	44	0	0.025	37	10	0.3	3.7318
Aplan-10C-3676-Thy_vs_Aplan-10C-3676-Tail	chr7	16885120	16885120	G	C	Dact3	c.539G>C	p.Arg180Pro	missense_variant	MODERATE	41	0	0.03	32	9	0.285	3.53922
Aplan-10C-3676-Thy_vs_Aplan-10C-3676-Tail	chr7	17747182	17747182	G	T	Ceacam5	c.853G>T	p.Gly285Trp	missense_variant	MODERATE	140	0	0.009056	120	37	0.319	5.82026
Aplan-10C-3676-Thy_vs_Aplan-10C-3676-Tail	chr7	19081309	19081309	C	G	Dmwd	c.1875+8C>G		splice_region_variant&intron_variant	LOW	38	0	0.029	25	9	0.4	4.06389
Aplan-10C-3676-Thy_vs_Aplan-10C-3676-Tail	chr7	24533548	24533548	C	G	Irgq	c.813C>G	p.Asn271Lys	missense_variant	MODERATE	52	0	0.021	36	12	0.387	5.21505
Aplan-10C-3676-Thy_vs_Aplan-10C-3676-Tail	chr7	25080726	25080726	C	G	Zfp574	c.1172C>G	p.Pro391Arg	missense_variant	MODERATE	96	0	0.012	91	31	0.325	6.05249
Aplan-10C-3676-Thy_vs_Aplan-10C-3676-Tail	chr7	25225293	25225293	C	G	Zfp526	c.976C>G	p.Arg326Gly	missense_variant	MODERATE	34	0	0.031	23	4	0.238	1.64942
Aplan-10C-3676-Thy_vs_Aplan-10C-3676-Tail	chr7	25388396	25388396	G	C	Lipe	c.367C>G	p.Arg123Gly	missense_variant	MODERATE	61	0	0.019	44	17	0.39	7.37807
Aplan-10C-3676-Thy_vs_Aplan-10C-3676-Tail	chr7	28094152	28094152	G	C	Fcgbp	c.3478G>C	p.Val1160Leu	missense_variant	MODERATE	40	0	0.027	23	8	0.35	3.89756
Aplan-10C-3676-Thy_vs_Aplan-10C-3676-Tail	chr7	28541221	28541221	C	G	Sycn	c.312C>G	p.Thr104Thr	synonymous_variant	LOW	40	0	0.028	33	11	0.345	4.2645
Aplan-10C-3676-Thy_vs_Aplan-10C-3676-Tail	chr7	28607957	28607957	G	C	Acp7	c.1474C>G	p.Arg492Gly	missense_variant	MODERATE	80	2	0.031	53	20	0.366	7.05234
Aplan-10C-3676-Thy_vs_Aplan-10C-3676-Tail	chr7	28776998	28776998	G	C	Sirt2	c.271G>C	p.Ala91Pro	missense_variant&splice_region_variant	MODERATE	63	0	0.017	51	18	0.326	7.15711
Aplan-10C-3676-Thy_vs_Aplan-10C-3676-Tail	chr7	29009092	29009092	C	G	Ryr1	c.14465G>C	p.Arg4822Pro	missense_variant	MODERATE	33	0	0.032	28	10	0.346	3.83706
Aplan-10C-3676-Thy_vs_Aplan-10C-3676-Tail	chr7	29161608	29161608	G	C	Spred3	c.1145C>G	p.Ala382Gly	missense_variant	MODERATE	49	0	0.021	29	9	0.285	4.26029
Aplan-10C-3676-Thy_vs_Aplan-10C-3676-Tail	chr7	29934500	29934500	G	A	Zfp74	c.1782C>T	p.Thr594Thr	synonymous_variant	LOW	48	0	0.023	32	10	0.349	4.40692
Aplan-10C-3676-Thy_vs_Aplan-10C-3676-Tail	chr7	30870040	30870040	G	C	Cd22	c.1650C>G	p.Cys550Trp	missense_variant	MODERATE	28	0	0.037	33	18	0.536	5.87277
Aplan-10C-3676-Thy_vs_Aplan-10C-3676-Tail	chr7	31375638	31375638	G	C	Scgb1b3	c.31G>C	p.Gly11Arg	missense_variant	MODERATE	78	1	0.016	51	14	0.276	5.15769
Aplan-10C-3676-Thy_vs_Aplan-10C-3676-Tail	chr7	43721084	43721084	G	C	Klk13	c.170G>C	p.Arg57Pro	missense_variant	MODERATE	56	0	0.021	62	21	0.345	6.14369
Aplan-10C-3676-Thy_vs_Aplan-10C-3676-Tail	chr7	43883956	43883956	G	C	Klk4	c.238G>C	p.Val80Leu	missense_variant	MODERATE	43	0	0.024	36	10	0.323	3.75341
Aplan-10C-3676-Thy_vs_Aplan-10C-3676-Tail	chr7	45008025	45008025	G	C	Scaf1	c.1429C>G	p.Arg477Gly	missense_variant	MODERATE	30	0	0.039	17	6	0.412	2.93833
Aplan-10C-3676-Thy_vs_Aplan-10C-3676-Tail	chr7	45047855	45047855	C	G	Prr12	c.2635G>C	p.Gly879Arg	missense_variant	MODERATE	16	0	0.059	16	3	0.2	0.646264
Aplan-10C-3676-Thy_vs_Aplan-10C-3676-Tail	chr7	45520850	45520850	G	C	Tulp2	c.1280G>C	p.Cys427Ser	missense_variant	MODERATE	77	0	0.016	50	22	0.437	6.01993
Aplan-10C-3676-Thy_vs_Aplan-10C-3676-Tail	chr7	45686579	45686579	C	G	Ntn5	c.433C>G	p.Pro145Ala	missense_variant	MODERATE	25	0	0.038	19	4	0.25	1.54436
Aplan-10C-3676-Thy_vs_Aplan-10C-3676-Tail	chr7	45694267	45694267	C	G	Ntn5	c.1236C>G	p.His412Gln	missense_variant	MODERATE	31	0	0.04	14	6	0.416	3.43334
Aplan-10C-3676-Thy_vs_Aplan-10C-3676-Tail	chr7	45713375	45713375	C	G	Sphk2	c.291G>C	p.Thr97Thr	synonymous_variant	LOW	27	0	0.036	12	7	0.572	4.28826
Aplan-10C-3676-Thy_vs_Aplan-10C-3676-Tail	chr7	45722494	45722494	C	G	Fam83e	c.314C>G	p.Pro105Arg	missense_variant	MODERATE	13	0	0.07	13	3	0.333	0.657577
Aplan-10C-3676-Thy_vs_Aplan-10C-3676-Tail	chr7	45862281	45862281	G	C	Grin2d	c.739C>G	p.Arg247Gly	missense_variant	MODERATE	13	0	0.068	9	3	0.363	1.26324
Aplan-10C-3676-Thy_vs_Aplan-10C-3676-Tail	chr7	46876520	46876520	G	C	Ldhc	c.757G>C	p.Gly253Arg	missense_variant	MODERATE	64	0	0.019	58	14	0.271	4.92587
Aplan-10C-3676-Thy_vs_Aplan-10C-3676-Tail	chr7	48870767	48870767	G	C	E2f8	c.1805C>G	p.Ala602Gly	missense_variant	MODERATE	68	0	0.018	52	12	0.239	4.70829
Aplan-10C-3676-Thy_vs_Aplan-10C-3676-Tail	chr7	58788436	58788436	C	G	Atp10a	c.1365C>G	p.His455Gln	missense_variant	MODERATE	74	0	0.016	37	11	0.303	5.74312
Aplan-10C-3676-Thy_vs_Aplan-10C-3676-Tail	chr7	63099703	63099703	G	C	Chrna7	c.1030C>G	p.Arg344Gly	missense_variant	MODERATE	39	0	0.03	22	5	0.2	2.35394
Aplan-10C-3676-Thy_vs_Aplan-10C-3676-Tail	chr7	66290748	66290748	G	C	Lrrk1	c.2385C>G	p.Asp795Glu	missense_variant	MODERATE	60	0	0.021	55	15	0.298	5.3041
Aplan-10C-3676-Thy_vs_Aplan-10C-3676-Tail	chr7	66659711	66659711	G	C	Asb7	c.756C>G	p.Ala252Ala	synonymous_variant	LOW	85	0	0.012	71	23	0.333	6.63082
Aplan-10C-3676-Thy_vs_Aplan-10C-3676-Tail	chr7	67679048	67679048	G	C	Ttc23	c.736G>C	p.Ala246Pro	missense_variant	MODERATE	57	0	0.023	38	14	0.364	6.32507
Aplan-10C-3676-Thy_vs_Aplan-10C-3676-Tail	chr7	67736614	67736614	G	C	Synm	c.1299C>G	p.His433Gln	missense_variant	MODERATE	89	0	0.013	77	21	0.282	5.9166
Aplan-10C-3676-Thy_vs_Aplan-10C-3676-Tail	chr7	79454646	79454646	G	C	Polg	c.2480C>G	p.Thr827Ser	missense_variant	MODERATE	70	0	0.016	48	16	0.326	7.014
Aplan-10C-3676-Thy_vs_Aplan-10C-3676-Tail	chr7	80252538	80252538	G	C	Ttll13	c.455G>C	p.Arg152Pro	missense_variant	MODERATE	54	0	0.024	61	27	0.467	5.89065
Aplan-10C-3676-Thy_vs_Aplan-10C-3676-Tail	chr7	82611878	82611878	G	C	Adamtsl3	c.5014+5G>C		splice_region_variant&intron_variant	LOW	17	0	0.067	27	5	0.23	0.856344
Aplan-10C-3676-Thy_vs_Aplan-10C-3676-Tail	chr7	82612402	82612402	G	C	Adamtsl3	c.5025G>C	p.Thr1675Thr	synonymous_variant	LOW	95	0	0.013	75	20	0.276	6.26978
Aplan-10C-3676-Thy_vs_Aplan-10C-3676-Tail	chr7	84250138	84250138	G	C	Arnt2	c.2057C>G	p.Pro686Arg	missense_variant	MODERATE	49	0	0.026	26	11	0.409	5.80208
Aplan-10C-3676-Thy_vs_Aplan-10C-3676-Tail	chr7	100998850	100998850	C	G	P2ry2	c.247G>C	p.Ala83Pro	missense_variant	MODERATE	75	0	0.016	52	13	0.256	5.47644
Aplan-10C-3676-Thy_vs_Aplan-10C-3676-Tail	chr7	101277011	101277011	C	G	Fchsd2	c.1777+8C>G		splice_region_variant&intron_variant	LOW	47	0	0.023	50	14	0.255	4.33959
Aplan-10C-3676-Thy_vs_Aplan-10C-3676-Tail	chr7	101321835	101321835	G	C	Stard10	c.9G>C	p.Lys3Asn	missense_variant	MODERATE	25	0	0.042	30	9	0.321	2.58983
Aplan-10C-3676-Thy_vs_Aplan-10C-3676-Tail	chr7	101824200	101824200	C	G	Inppl1	c.3242G>C	p.Arg1081Pro	missense_variant	MODERATE	48	0	0.021	39	7	0.222	2.57968
Aplan-10C-3676-Thy_vs_Aplan-10C-3676-Tail	chr7	102670736	102670736	G	C	Olfr556	c.815G>C	p.Arg272Pro	missense_variant	MODERATE	108	0	0.011	83	22	0.264	7.15135
Aplan-10C-3676-Thy_vs_Aplan-10C-3676-Tail	chr7	103612126	103612126	C	G	Olfr620	c.226G>C	p.Gly76Arg	missense_variant	MODERATE	113	2	0.019	103	34	0.305	6.11804
Aplan-10C-3676-Thy_vs_Aplan-10C-3676-Tail	chr7	104040720	104040720	G	C	Olfr641	c.923G>C	p.Arg308Pro	missense_variant	MODERATE	94	0	0.012	85	38	0.44	5.99592
Aplan-10C-3676-Thy_vs_Aplan-10C-3676-Tail	chr7	104129477	104129477	G	C	4931431F19Rik	c.139C>G	p.Arg47Gly	missense_variant	MODERATE	57	0	0.019	48	11	0.226	4.04244
Aplan-10C-3676-Thy_vs_Aplan-10C-3676-Tail	chr7	109020960	109020960	C	G	Tub	c.184C>G	p.Arg62Gly	missense_variant	MODERATE	19	0	0.063	7	2	0.375	1.18966
Aplan-10C-3676-Thy_vs_Aplan-10C-3676-Tail	chr7	112319728	112319728	G	C	Mical2	c.1223G>C	p.Gly408Ala	missense_variant	MODERATE	28	0	0.042	17	6	0.353	2.81831
Aplan-10C-3676-Thy_vs_Aplan-10C-3676-Tail	chr7	112346857	112346857	G	C	Mical2	c.3025G>C	p.Val1009Leu	missense_variant	MODERATE	45	0	0.028	31	9	0.296	3.84922
Aplan-10C-3676-Thy_vs_Aplan-10C-3676-Tail	chr7	112353894	112353894	G	C	Mical2	c.3269-5G>C		splice_region_variant&intron_variant	LOW	99	0	0.013	75	24	0.329	6.31938
Aplan-10C-3676-Thy_vs_Aplan-10C-3676-Tail	chr7	116140398	116140398	G	C	Plekha7	c.2615C>G	p.Thr872Arg	missense_variant	MODERATE	31	0	0.035	29	8	0.296	2.77533
Aplan-10C-3676-Thy_vs_Aplan-10C-3676-Tail	chr7	116140417	116140417	G	C	Plekha7	c.2596C>G	p.Pro866Ala	missense_variant	MODERATE	37	0	0.029	31	7	0.25	2.56664
Aplan-10C-3676-Thy_vs_Aplan-10C-3676-Tail	chr7	120312586	120312586	G	T	Abca14	c.4170G>T	p.Leu1390Leu	synonymous_variant	LOW	58	0	0.022	64	30	0.473	5.83979
Aplan-10C-3676-Thy_vs_Aplan-10C-3676-Tail	chr7	121118640	121118640	G	C	Otoa	c.1079G>C	p.Arg360Pro	missense_variant	MODERATE	26	0	0.045	22	7	0.3	2.63521
Aplan-10C-3676-Thy_vs_Aplan-10C-3676-Tail	chr7	121125476	121125476	G	C	Otoa	c.1377G>C	p.Thr459Thr	synonymous_variant	LOW	42	0	0.026	45	15	0.324	4.77339
Aplan-10C-3676-Thy_vs_Aplan-10C-3676-Tail	chr7	121127665	121127665	G	C	Otoa	c.1522G>C	p.Ala508Pro	missense_variant	MODERATE	53	0	0.023	36	13	0.375	5.78423
Aplan-10C-3676-Thy_vs_Aplan-10C-3676-Tail	chr7	122127466	122127466	G	C	Palb2	c.1180C>G	p.Arg394Gly	missense_variant	MODERATE	168	0	0.007141	122	39	0.309	6.03902
Aplan-10C-3676-Thy_vs_Aplan-10C-3676-Tail	chr7	125699396	125699396	G	C	Gtf3c1	c.556C>G	p.Arg186Gly	missense_variant	MODERATE	30	0	0.036	35	7	0.218	1.90021
Aplan-10C-3676-Thy_vs_Aplan-10C-3676-Tail	chr7	126447229	126447229	G	C	Atp2a1	c.2770C>G	p.Arg924Gly	missense_variant	MODERATE	31	0	0.034	17	7	0.421	3.57817
Aplan-10C-3676-Thy_vs_Aplan-10C-3676-Tail	chr7	126468588	126468588	C	G	Sh2b1	c.1779G>C	p.Trp593Cys	missense_variant	MODERATE	37	0	0.028	43	12	0.305	3.54463
Aplan-10C-3676-Thy_vs_Aplan-10C-3676-Tail	chr7	126786506	126786506	G	C	Ppp4c	c.660C>G	p.Asp220Glu	missense_variant	MODERATE	47	0	0.025	23	7	0.318	3.68929
Aplan-10C-3676-Thy_vs_Aplan-10C-3676-Tail	chr7	126797418	126797418	G	C	Aldoa	c.405C>G	p.His135Gln	missense_variant	MODERATE	70	0	0.017	70	29	0.433	5.81734
Aplan-10C-3676-Thy_vs_Aplan-10C-3676-Tail	chr7	126819888	126819888	G	C	Fam57b	c.59G>C	p.Arg20Pro	missense_variant	MODERATE	46	0	0.025	33	17	0.52	6.16358
Aplan-10C-3676-Thy_vs_Aplan-10C-3676-Tail	chr7	127236891	127236891	C	G	Zfp553	c.1617C>G	p.Thr539Thr	synonymous_variant	LOW	76	0	0.015	49	12	0.266	5.28087
Aplan-10C-3676-Thy_vs_Aplan-10C-3676-Tail	chr7	127595934	127595934	G	GA	Rnf40	c.1521dupA	p.Leu508fs	frameshift_variant	HIGH	55	0	0.022	48	20	0.384	5.95036
Aplan-10C-3676-Thy_vs_Aplan-10C-3676-Tail	chr7	127595941	127595941	C	A	Rnf40	c.1525C>A	p.Arg509Arg	synonymous_variant	LOW	56	0	0.021	48	20	0.394	5.94531
Aplan-10C-3676-Thy_vs_Aplan-10C-3676-Tail	chr7	127933792	127933792	C	G	Prss36	c.1927G>C	p.Gly643Arg	missense_variant	MODERATE	50	0	0.023	48	15	0.337	5.22304
Aplan-10C-3676-Thy_vs_Aplan-10C-3676-Tail	chr7	128068672	128068672	C	G	Itgam	c.214C>G	p.Arg72Gly	missense_variant	MODERATE	26	0	0.05	34	11	0.3	2.85875
Aplan-10C-3676-Thy_vs_Aplan-10C-3676-Tail	chr7	128244365	128244365	G	C	Armc5	c.2329G>C	p.Gly777Arg	missense_variant	MODERATE	27	0	0.039	15	6	0.378	3.02041
Aplan-10C-3676-Thy_vs_Aplan-10C-3676-Tail	chr7	131555923	131555923	G	C	Hmx2	c.765G>C	p.Pro255Pro	synonymous_variant	LOW	38	0	0.029	26	5	0.222	2.06412
Aplan-10C-3676-Thy_vs_Aplan-10C-3676-Tail	chr7	139988229	139988229	G	C	Adam8	c.927C>G	p.Ser309Ser	synonymous_variant	LOW	63	0	0.02	50	20	0.412	6.60631
Aplan-10C-3676-Thy_vs_Aplan-10C-3676-Tail	chr7	140093471	140093471	G	C	Prap1	c.8+3G>C		splice_region_variant&intron_variant	LOW	19	0	0.063	17	5	0.384	1.78478
Aplan-10C-3676-Thy_vs_Aplan-10C-3676-Tail	chr7	140610871	140610871	G	A	Olfr46	c.704G>A	p.Arg235His	missense_variant	MODERATE	393	1	0.006067	346	103	0.313	5.87385
Aplan-10C-3676-Thy_vs_Aplan-10C-3676-Tail	chr7	141009879	141009879	C	G	Ifitm3	c.260G>C	p.Arg87Pro	missense_variant	MODERATE	33	0	0.034	25	6	0.23	2.35897
Aplan-10C-3676-Thy_vs_Aplan-10C-3676-Tail	chr7	141063879	141063879	G	C	B4galnt4	c.194G>C	p.Arg65Pro	missense_variant	MODERATE	14	0	0.081	13	3	0.25	1.00976
Aplan-10C-3676-Thy_vs_Aplan-10C-3676-Tail	chr7	141106866	141106866	C	G	Ano9	c.1204G>C	p.Gly402Arg	missense_variant	MODERATE	48	0	0.024	44	13	0.333	4.63355
Aplan-10C-3676-Thy_vs_Aplan-10C-3676-Tail	chr7	141258603	141258603	C	G	Phrf1	c.2187C>G	p.Val729Val	synonymous_variant	LOW	40	0	0.025	32	8	0.3	3.05611
Aplan-10C-3676-Thy_vs_Aplan-10C-3676-Tail	chr7	141313261	141313261	G	C	Deaf1	c.1217C>G	p.Pro406Arg	missense_variant	MODERATE	121	0	0.011	81	19	0.269	6.58301
Aplan-10C-3676-Thy_vs_Aplan-10C-3676-Tail	chr7	141997012	141997012	G	C	Brsk2	c.1671G>C	p.Ser557Ser	splice_region_variant&synonymous_variant	LOW	33	0	0.032	26	7	0.279	2.71485
Aplan-10C-3676-Thy_vs_Aplan-10C-3676-Tail	chr7	144409673	144409673	C	G	Shank2	c.1647C>G	p.Pro549Pro	synonymous_variant	LOW	34	0	0.031	24	11	0.476	4.96008
Aplan-10C-3676-Thy_vs_Aplan-10C-3676-Tail	chr8	11199829	11199829	C	T	Col4a1	c.4982G>A	p.Arg1661His	missense_variant	MODERATE	38	0	0.032	25	13	0.474	6.30385
Aplan-10C-3676-Thy_vs_Aplan-10C-3676-Tail	chr8	13055399	13055399	C	G	F10	c.999C>G	p.Ala333Ala	synonymous_variant	LOW	37	0	0.03	18	6	0.333	3.19357
Aplan-10C-3676-Thy_vs_Aplan-10C-3676-Tail	chr8	15984715	15984715	C	G	Csmd1	c.7455G>C	p.Ser2485Ser	synonymous_variant	LOW	27	0	0.038	22	11	0.5	4.61597
Aplan-10C-3676-Thy_vs_Aplan-10C-3676-Tail	chr8	22259325	22259325	G	C	Thsd1	c.2211G>C	p.Pro737Pro	synonymous_variant	LOW	46	0	0.025	52	18	0.334	5.65537
Aplan-10C-3676-Thy_vs_Aplan-10C-3676-Tail	chr8	22366005	22366005	C	T	Tpte	c.1820C>T	p.Pro607Leu	missense_variant&splice_region_variant	MODERATE	138	0	0.008774	115	45	0.413	6.05778
Aplan-10C-3676-Thy_vs_Aplan-10C-3676-Tail	chr8	24812422	24812422	C	G	Adam5	c.554G>C	p.Arg185Pro	missense_variant	MODERATE	166	1	0.008385	151	47	0.316	6.30724
Aplan-10C-3676-Thy_vs_Aplan-10C-3676-Tail	chr8	25954606	25954606	G	C	Hgsnat	c.1313C>G	p.Thr438Ser	missense_variant&splice_region_variant	MODERATE	24	0	0.045	18	7	0.467	2.92826
Aplan-10C-3676-Thy_vs_Aplan-10C-3676-Tail	chr8	35590490	35590490	C	G	Mfhas1	c.2118C>G	p.Ser706Arg	missense_variant	MODERATE	29	0	0.033	14	4	0.356	2.09092
Aplan-10C-3676-Thy_vs_Aplan-10C-3676-Tail	chr8	43521612	43521612	C	G	Adam26b	c.352G>C	p.Gly118Arg	missense_variant	MODERATE	272	0	0.00417	265	74	0.32	5.91606
Aplan-10C-3676-Thy_vs_Aplan-10C-3676-Tail	chr8	57583955	57583955	C	G	Galnt7	c.399G>C	p.Gly133Gly	synonymous_variant	LOW	59	0	0.018	63	17	0.255	5.29873
Aplan-10C-3676-Thy_vs_Aplan-10C-3676-Tail	chr8	69811525	69811525	C	G	Gmip	c.442-8C>G		splice_region_variant&intron_variant	LOW	37	0	0.027	20	5	0.304	2.43147
Aplan-10C-3676-Thy_vs_Aplan-10C-3676-Tail	chr8	70333140	70333140	G	C	Upf1	c.3088C>G	p.Arg1030Gly	missense_variant	MODERATE	21	0	0.05	31	8	0.271	1.80846
Aplan-10C-3676-Thy_vs_Aplan-10C-3676-Tail	chr8	70337064	70337064	G	C	Upf1	c.2153C>G	p.Pro718Arg	missense_variant	MODERATE	37	0	0.036	24	6	0.238	2.61546
Aplan-10C-3676-Thy_vs_Aplan-10C-3676-Tail	chr8	70392124	70392124	G	C	Crtc1	c.1048C>G	p.Pro350Ala	missense_variant	MODERATE	16	0	0.077	8	5	0.556	2.88024
Aplan-10C-3676-Thy_vs_Aplan-10C-3676-Tail	chr8	71374613	71374613	C	G	Nr2f6	c.1043G>C	p.Arg348Pro	missense_variant	MODERATE	27	0	0.041	20	5	0.263	1.99536
Aplan-10C-3676-Thy_vs_Aplan-10C-3676-Tail	chr8	71584510	71584510	C	G	Slc27a1	c.1297C>G	p.Arg433Gly	missense_variant	MODERATE	28	0	0.037	24	7	0.318	2.5872
Aplan-10C-3676-Thy_vs_Aplan-10C-3676-Tail	chr8	71602582	71602582	C	G	Fam129c	c.733C>G	p.Arg245Gly	missense_variant	MODERATE	23	0	0.042	9	3	0.444	1.7712
Aplan-10C-3676-Thy_vs_Aplan-10C-3676-Tail	chr8	72467947	72467947	G	A	Cherp	c.972C>T	p.Phe324Phe	synonymous_variant	LOW	33	0	0.033	27	10	0.391	3.95119
Aplan-10C-3676-Thy_vs_Aplan-10C-3676-Tail	chr8	72496198	72496198	C	G	Med26	c.1056G>C	p.Thr352Thr	synonymous_variant	LOW	29	0	0.035	28	5	0.214	1.62945
Aplan-10C-3676-Thy_vs_Aplan-10C-3676-Tail	chr8	80668915	80668915	C	G	Frem3	c.5570C>G	p.Ala1857Gly	missense_variant	MODERATE	53	0	0.022	42	16	0.37	6.5204
Aplan-10C-3676-Thy_vs_Aplan-10C-3676-Tail	chr8	84566207	84566207	C	G	Cacna1a	c.3223C>G	p.Arg1075Gly	missense_variant	MODERATE	20	0	0.059	28	7	0.32	1.49657
Aplan-10C-3676-Thy_vs_Aplan-10C-3676-Tail	chr8	84569896	84569896	C	G	Cacna1a	c.3549-7C>G		splice_region_variant&intron_variant	LOW	72	0	0.017	62	19	0.354	7.11661
Aplan-10C-3676-Thy_vs_Aplan-10C-3676-Tail	chr8	84611601	84611601	C	G	Cacna1a	c.5109C>G	p.Ser1703Arg	missense_variant	MODERATE	20	0	0.05	13	4	0.31	1.75763
Aplan-10C-3676-Thy_vs_Aplan-10C-3676-Tail	chr8	84904919	84904919	C	G	Klf1	c.1111C>G	p.His371Asp	missense_variant	MODERATE	40	0	0.035	28	6	0.25	2.46319
Aplan-10C-3676-Thy_vs_Aplan-10C-3676-Tail	chr8	85364724	85364724	C	G	Mylk3	c.451G>C	p.Gly151Arg	missense_variant	MODERATE	23	0	0.042	24	13	0.542	4.5871
Aplan-10C-3676-Thy_vs_Aplan-10C-3676-Tail	chr8	85365057	85365057	C	G	Mylk3	c.118G>C	p.Asp40His	missense_variant	MODERATE	92	0	0.013	95	23	0.25	6.23997
Aplan-10C-3676-Thy_vs_Aplan-10C-3676-Tail	chr8	85505651	85505651	C	G	Gpt2	c.406C>G	p.Arg136Gly	missense_variant	MODERATE	77	0	0.015	78	18	0.243	5.59855
Aplan-10C-3676-Thy_vs_Aplan-10C-3676-Tail	chr8	86548658	86548658	C	G	Abcc12	c.1390G>C	p.Val464Leu	missense_variant	MODERATE	159	0	0.007675	115	38	0.331	5.79354
Aplan-10C-3676-Thy_vs_Aplan-10C-3676-Tail	chr8	91106868	91106868	C	G	Rbl2	c.2399C>G	p.Pro800Arg	missense_variant	MODERATE	63	0	0.016	65	19	0.31	6.07548
Aplan-10C-3676-Thy_vs_Aplan-10C-3676-Tail	chr8	91263573	91263573	C	G	Rpgrip1l	c.2240G>C	p.Arg747Pro	missense_variant	MODERATE	164	0	0.007477	140	49	0.339	5.83462
Aplan-10C-3676-Thy_vs_Aplan-10C-3676-Tail	chr8	94070093	94070093	C	G	Bbs2	c.1928G>C	p.Arg643Pro	missense_variant	MODERATE	72	0	0.018	53	19	0.369	6.45174
Aplan-10C-3676-Thy_vs_Aplan-10C-3676-Tail	chr8	94077036	94077036	G	C	Bbs2	c.1575C>G	p.Asn525Lys	missense_variant	MODERATE	144	0	0.008566	142	48	0.33	5.9275
Aplan-10C-3676-Thy_vs_Aplan-10C-3676-Tail	chr8	94865217	94865217	G	T	Dok4	c.890C>A	p.Ser297*	stop_gained	HIGH	56	0	0.021	37	15	0.394	6.92127
Aplan-10C-3676-Thy_vs_Aplan-10C-3676-Tail	chr8	95709190	95709190	C	G	Ndrg4	c.620+4C>G		splice_region_variant&intron_variant	LOW	22	0	0.045	30	9	0.307	2.17839
Aplan-10C-3676-Thy_vs_Aplan-10C-3676-Tail	chr8	95748846	95748846	G	C	Cnot1	c.3184C>G	p.Pro1062Ala	missense_variant&splice_region_variant	MODERATE	187	0	0.006613	135	34	0.254	5.82206
Aplan-10C-3676-Thy_vs_Aplan-10C-3676-Tail	chr8	104549650	104549650	C	G	Car7	c.766C>G	p.Arg256Gly	missense_variant	MODERATE	31	0	0.033	26	9	0.384	3.45928
Aplan-10C-3676-Thy_vs_Aplan-10C-3676-Tail	chr8	105050507	105050507	C	G	Ces3a	c.461C>G	p.Ser154Cys	missense_variant	MODERATE	90	0	0.013	95	28	0.282	6.17459
Aplan-10C-3676-Thy_vs_Aplan-10C-3676-Tail	chr8	105146683	105146683	C	G	Ces4a	c.1159C>G	p.Leu387Val	missense_variant	MODERATE	96	0	0.013	78	26	0.356	5.73869
Aplan-10C-3676-Thy_vs_Aplan-10C-3676-Tail	chr8	105945654	105945654	G	C	Slc12a4	c.2520C>G	p.His840Gln	missense_variant	MODERATE	37	0	0.032	36	16	0.419	5.85816
Aplan-10C-3676-Thy_vs_Aplan-10C-3676-Tail	chr8	106264674	106264674	C	G	Smpd3	c.1246G>C	p.Val416Leu	missense_variant	MODERATE	54	0	0.02	56	27	0.511	6.52476
Aplan-10C-3676-Thy_vs_Aplan-10C-3676-Tail	chr8	106265444	106265444	C	G	Smpd3	c.476G>C	p.Arg159Pro	missense_variant	MODERATE	52	0	0.022	44	13	0.289	4.89069
Aplan-10C-3676-Thy_vs_Aplan-10C-3676-Tail	chr8	106725237	106725237	C	G	Tango6	c.1956C>G	p.Ala652Ala	synonymous_variant	LOW	18	0	0.057	18	4	0.265	0.983401
Aplan-10C-3676-Thy_vs_Aplan-10C-3676-Tail	chr8	106807088	106807088	C	G	Tango6	c.2845C>G	p.Arg949Gly	missense_variant	MODERATE	40	0	0.032	24	11	0.476	5.47407
Aplan-10C-3676-Thy_vs_Aplan-10C-3676-Tail	chr8	108956727	108956727	C	G	Zfhx3	c.10797C>G	p.Pro3599Pro	synonymous_variant	LOW	37	0	0.029	40	15	0.363	4.85213
Aplan-10C-3676-Thy_vs_Aplan-10C-3676-Tail	chr8	110538453	110538453	C	G	Hydin	c.8267C>G	p.Pro2756Arg	missense_variant	MODERATE	22	0	0.043	23	14	0.546	5.16664
Aplan-10C-3676-Thy_vs_Aplan-10C-3676-Tail	chr8	110593676	110593676	C	G	Hydin	c.13351C>G	p.Leu4451Val	missense_variant	MODERATE	32	0	0.042	30	8	0.32	2.76168
Aplan-10C-3676-Thy_vs_Aplan-10C-3676-Tail	chr8	110653638	110653638	C	G	Vac14	c.1332C>G	p.Phe444Leu	missense_variant	MODERATE	67	0	0.017	53	16	0.379	6.32041
Aplan-10C-3676-Thy_vs_Aplan-10C-3676-Tail	chr8	111187793	111187793	C	A	Glg1	c.1358G>T	p.Arg453Leu	missense_variant	MODERATE	39	0	0.031	38	7	0.206	2.28001
Aplan-10C-3676-Thy_vs_Aplan-10C-3676-Tail	chr8	111689565	111689565	C	G	Ctrb1	c.88G>C	p.Gly30Arg	missense_variant	MODERATE	30	0	0.039	38	10	0.294	2.76215
Aplan-10C-3676-Thy_vs_Aplan-10C-3676-Tail	chr8	117030649	117030649	C	G	Pkd1l2	c.4646G>C	p.Arg1549Pro	missense_variant	MODERATE	25	0	0.043	33	13	0.419	3.62403
Aplan-10C-3676-Thy_vs_Aplan-10C-3676-Tail	chr8	117047497	117047497	C	G	Pkd1l2	c.2978G>C	p.Arg993Pro	missense_variant	MODERATE	20	0	0.056	13	5	0.455	2.26579
Aplan-10C-3676-Thy_vs_Aplan-10C-3676-Tail	chr8	117581695	117581695	C	G	Plcg2	c.1025C>G	p.Thr342Arg	missense_variant	MODERATE	56	0	0.024	34	10	0.286	4.63975
Aplan-10C-3676-Thy_vs_Aplan-10C-3676-Tail	chr8	119236915	119236915	C	G	Cdh13	c.1233C>G	p.Phe411Leu	missense_variant	MODERATE	40	0	0.027	53	18	0.355	5.02072
Aplan-10C-3676-Thy_vs_Aplan-10C-3676-Tail	chr8	119402495	119402495	C	G	Mlycd	c.700C>G	p.Arg234Gly	missense_variant	MODERATE	77	0	0.018	39	9	0.236	4.556
Aplan-10C-3676-Thy_vs_Aplan-10C-3676-Tail	chr8	119402598	119402598	C	G	Mlycd	c.795+8C>G		splice_region_variant&intron_variant	LOW	59	0	0.02	33	9	0.31	4.35268
Aplan-10C-3676-Thy_vs_Aplan-10C-3676-Tail	chr8	119443055	119443055	G	C	Osgin1	c.344G>C	p.Arg115Pro	missense_variant	MODERATE	54	0	0.022	29	6	0.233	2.90014
Aplan-10C-3676-Thy_vs_Aplan-10C-3676-Tail	chr8	119615002	119615002	C	G	Adad2	c.641C>G	p.Thr214Arg	missense_variant	MODERATE	34	1	0.06	26	8	0.375	2.13356
Aplan-10C-3676-Thy_vs_Aplan-10C-3676-Tail	chr8	119869798	119869798	C	G	Klhl36	c.237C>G	p.Arg79Arg	synonymous_variant	LOW	59	0	0.02	34	12	0.375	5.88064
Aplan-10C-3676-Thy_vs_Aplan-10C-3676-Tail	chr8	121116749	121116749	G	C	Foxc2	c.135G>C	p.Pro45Pro	synonymous_variant	LOW	30	0	0.035	15	3	0.234	1.49397
Aplan-10C-3676-Thy_vs_Aplan-10C-3676-Tail	chr8	121596060	121596060	C	G	Map1lc3b	c.171C>G	p.His57Gln	missense_variant	MODERATE	62	0	0.02	30	7	0.214	3.6338
Aplan-10C-3676-Thy_vs_Aplan-10C-3676-Tail	chr8	121604541	121604541	C	G	Zcchc14	c.2082G>C	p.Ala694Ala	synonymous_variant	LOW	29	0	0.036	24	12	0.55	4.99413
Aplan-10C-3676-Thy_vs_Aplan-10C-3676-Tail	chr8	121883694	121883694	G	C	Slc7a5	c.1380C>G	p.Pro460Pro	synonymous_variant	LOW	47	0	0.024	33	10	0.31	4.25013
Aplan-10C-3676-Thy_vs_Aplan-10C-3676-Tail	chr8	122497841	122497841	C	G	Piezo1	c.2160G>C	p.Pro720Pro	synonymous_variant	LOW	17	0	0.056	23	11	0.455	3.10585
Aplan-10C-3676-Thy_vs_Aplan-10C-3676-Tail	chr8	122866866	122866866	A	G	Cdh15	c.2198A>G	p.Asp733Gly	missense_variant	MODERATE	20	0	0.048	16	3	0.2	1.10551
Aplan-10C-3676-Thy_vs_Aplan-10C-3676-Tail	chr8	124030354	124030354	C	G	Urb2	c.2799C>G	p.Cys933Trp	missense_variant	MODERATE	77	0	0.015	66	26	0.418	6.3903
Aplan-10C-3676-Thy_vs_Aplan-10C-3676-Tail	chr8	124343317	124343317	C	G	Galnt2	c.1572C>G	p.Ile524Met	missense_variant	MODERATE	21	0	0.053	16	5	0.375	1.9991
Aplan-10C-3676-Thy_vs_Aplan-10C-3676-Tail	chr8	124793998	124793998	C	G	Trim67	c.98C>G	p.Thr33Ser	missense_variant	MODERATE	10	0	0.083	10	4	0.364	1.06204
Aplan-10C-3676-Thy_vs_Aplan-10C-3676-Tail	chr8	125670151	125670151	G	A	Map10	c.282G>A	p.Pro94Pro	synonymous_variant	LOW	14	0	0.067	11	2	0.231	0.736759
Aplan-10C-3676-Thy_vs_Aplan-10C-3676-Tail	chr8	125828044	125828044	C	G	Pcnx2	c.3308G>C	p.Arg1103Pro	missense_variant&splice_region_variant	MODERATE	28	0	0.036	23	7	0.315	2.67417
Aplan-10C-3676-Thy_vs_Aplan-10C-3676-Tail	chr8	126428921	126428921	G	C	Tarbp1	c.4077C>G	p.Leu1359Leu	synonymous_variant	LOW	12	0	0.091	17	4	0.25	0.917044
Aplan-10C-3676-Thy_vs_Aplan-10C-3676-Tail	chr9	7124743	7124743	C	G	Dync2h1	c.6128G>C	p.Arg2043Pro	missense_variant	MODERATE	110	0	0.011	96	30	0.317	6.21292
Aplan-10C-3676-Thy_vs_Aplan-10C-3676-Tail	chr9	15341542	15341542	G	C	Cep295	c.989C>G	p.Pro330Arg	missense_variant	MODERATE	74	0	0.019	78	22	0.283	6.12286
Aplan-10C-3676-Thy_vs_Aplan-10C-3676-Tail	chr9	20891013	20891013	G	T	Ppan	c.698+1G>T		splice_donor_variant&intron_variant	HIGH	59	0	0.019	42	16	0.308	6.98246
Aplan-10C-3676-Thy_vs_Aplan-10C-3676-Tail	chr9	20941412	20941412	G	C	Dnmt1	c.397C>G	p.Arg133Gly	missense_variant	MODERATE	150	1	0.008222	93	29	0.325	6.01662
Aplan-10C-3676-Thy_vs_Aplan-10C-3676-Tail	chr9	21038801	21038801	G	C	Icam5	c.2655G>C	p.Ala885Ala	synonymous_variant	LOW	31	0	0.037	12	5	0.429	3.08472
Aplan-10C-3676-Thy_vs_Aplan-10C-3676-Tail	chr9	21121673	21121673	G	A	Tyk2	c.793C>T	p.Arg265Cys	missense_variant	MODERATE	18	0	0.063	13	6	0.5	2.63253
Aplan-10C-3676-Thy_vs_Aplan-10C-3676-Tail	chr9	21121718	21121718	G	C	Tyk2	c.748C>G	p.Arg250Gly	missense_variant	MODERATE	16	0	0.067	12	7	0.538	3.17464
Aplan-10C-3676-Thy_vs_Aplan-10C-3676-Tail	chr9	21941080	21941080	G	C	Plppr2	c.334G>C	p.Val112Leu	missense_variant	MODERATE	12	0	0.073	12	5	0.385	1.42867
Aplan-10C-3676-Thy_vs_Aplan-10C-3676-Tail	chr9	35188868	35188868	C	G	Tirap	c.519G>C	p.Leu173Leu	synonymous_variant	LOW	36	0	0.028	48	19	0.425	5.18282
Aplan-10C-3676-Thy_vs_Aplan-10C-3676-Tail	chr9	36719650	36719650	C	T	Chek1	c.467G>A	p.Arg156Gln	missense_variant	MODERATE	47	0	0.026	47	14	0.302	4.40664
Aplan-10C-3676-Thy_vs_Aplan-10C-3676-Tail	chr9	36734410	36734410	G	C	Stt3a	c.1984C>G	p.Arg662Gly	missense_variant	MODERATE	89	0	0.014	56	15	0.29	6.76755
Aplan-10C-3676-Thy_vs_Aplan-10C-3676-Tail	chr9	37423322	37423322	G	C	Robo3	c.1811C>G	p.Thr604Arg	missense_variant	MODERATE	10	0	0.085	17	5	0.249	0.906601
Aplan-10C-3676-Thy_vs_Aplan-10C-3676-Tail	chr9	37537723	37537723	C	G	Esam	c.1126C>G	p.Arg376Gly	missense_variant	MODERATE	13	0	0.075	23	11	0.546	2.59132
Aplan-10C-3676-Thy_vs_Aplan-10C-3676-Tail	chr9	40187501	40187501	C	G	Olfr986	c.385C>G	p.Arg129Gly	missense_variant	MODERATE	97	0	0.011	69	17	0.269	7.04696
Aplan-10C-3676-Thy_vs_Aplan-10C-3676-Tail	chr9	41050555	41050555	G	C	Ubash3b	c.254C>G	p.Pro85Arg	missense_variant	MODERATE	17	0	0.063	15	6	0.434	2.25782
Aplan-10C-3676-Thy_vs_Aplan-10C-3676-Tail	chr9	42332527	42332527	C	G	Tecta	c.6043G>C	p.Gly2015Arg	missense_variant	MODERATE	33	0	0.036	35	8	0.266	2.29566
Aplan-10C-3676-Thy_vs_Aplan-10C-3676-Tail	chr9	42352112	42352112	G	T	Tecta	c.4177C>A	p.Arg1393Ser	missense_variant	MODERATE	31	0	0.034	25	7	0.306	2.68346
Aplan-10C-3676-Thy_vs_Aplan-10C-3676-Tail	chr9	42375171	42375171	C	G	Tecta	c.2188G>C	p.Ala730Pro	missense_variant	MODERATE	70	0	0.016	67	25	0.398	6.01178
Aplan-10C-3676-Thy_vs_Aplan-10C-3676-Tail	chr9	42384282	42384282	C	T	Tecta	c.916G>A	p.Glu306Lys	missense_variant	MODERATE	79	0	0.015	62	22	0.346	5.7868
Aplan-10C-3676-Thy_vs_Aplan-10C-3676-Tail	chr9	43310943	43310943	C	G	Trim29	c.68C>G	p.Pro23Arg	missense_variant	MODERATE	37	0	0.028	42	19	0.432	5.86477
Aplan-10C-3676-Thy_vs_Aplan-10C-3676-Tail	chr9	44151708	44151708	G	C	Cbl	c.2479C>G	p.Arg827Gly	missense_variant	MODERATE	55	1	0.026	29	12	0.414	5.33074
Aplan-10C-3676-Thy_vs_Aplan-10C-3676-Tail	chr9	44256689	44256689	G	C	Nlrx1	c.1910C>G	p.Ala637Gly	missense_variant	MODERATE	26	0	0.038	36	10	0.303	2.46096
Aplan-10C-3676-Thy_vs_Aplan-10C-3676-Tail	chr9	44281880	44281880	G	C	Abcg4	c.280C>G	p.Arg94Gly	missense_variant	MODERATE	60	0	0.02	55	13	0.276	4.52721
Aplan-10C-3676-Thy_vs_Aplan-10C-3676-Tail	chr9	44315030	44315030	G	C	C2cd2l	c.1237C>G	p.Arg413Gly	missense_variant	MODERATE	73	0	0.015	65	19	0.293	6.91799
Aplan-10C-3676-Thy_vs_Aplan-10C-3676-Tail	chr9	45066376	45066376	C	G	Mpzl3	c.281C>G	p.Ala94Gly	missense_variant	MODERATE	48	0	0.024	36	10	0.303	4.03592
Aplan-10C-3676-Thy_vs_Aplan-10C-3676-Tail	chr9	45184316	45184316	C	G	Tmprss4	c.229G>C	p.Gly77Arg	missense_variant	MODERATE	17	0	0.075	9	2	0.3	0.955581
Aplan-10C-3676-Thy_vs_Aplan-10C-3676-Tail	chr9	45185905	45185905	G	C	Tmprss4	c.61C>G	p.Arg21Gly	missense_variant	MODERATE	37	0	0.032	30	7	0.282	2.63061
Aplan-10C-3676-Thy_vs_Aplan-10C-3676-Tail	chr9	45717402	45717402	C	T	Dscaml1	c.3253C>T	p.Arg1085Trp	missense_variant	MODERATE	32	0	0.035	18	3	0.221	1.38057
Aplan-10C-3676-Thy_vs_Aplan-10C-3676-Tail	chr9	45721390	45721390	C	G	Dscaml1	c.3553C>G	p.Arg1185Gly	missense_variant	MODERATE	47	0	0.024	36	10	0.3	3.98087
Aplan-10C-3676-Thy_vs_Aplan-10C-3676-Tail	chr9	49073284	49073284	C	G	Zw10	c.1665C>G	p.Leu555Leu	synonymous_variant	LOW	80	0	0.016	78	25	0.328	6.61456
Aplan-10C-3676-Thy_vs_Aplan-10C-3676-Tail	chr9	49106150	49106150	C	G	Tmprss5	c.10C>G	p.Arg4Gly	missense_variant	MODERATE	52	0	0.025	34	9	0.296	3.94287
Aplan-10C-3676-Thy_vs_Aplan-10C-3676-Tail	chr9	50541150	50541150	C	G	Bco2	c.617G>C	p.Arg206Pro	missense_variant	MODERATE	56	0	0.021	39	13	0.358	5.63311
Aplan-10C-3676-Thy_vs_Aplan-10C-3676-Tail	chr9	51849960	51849960	C	G	Arhgap20	c.3110C>G	p.Ala1037Gly	missense_variant	MODERATE	75	0	0.014	66	18	0.262	6.55192
Aplan-10C-3676-Thy_vs_Aplan-10C-3676-Tail	chr9	53374791	53374791	C	A	Exph5	c.3171C>A	p.Ala1057Ala	synonymous_variant	LOW	94	0	0.012	72	26	0.34	6.39563
Aplan-10C-3676-Thy_vs_Aplan-10C-3676-Tail	chr9	53376850	53376850	C	G	Exph5	c.5230C>G	p.Arg1744Gly	missense_variant	MODERATE	98	0	0.011	89	35	0.372	5.95059
Aplan-10C-3676-Thy_vs_Aplan-10C-3676-Tail	chr9	53390650	53390650	C	G	Kdelc2	c.601C>G	p.Arg201Gly	missense_variant	MODERATE	69	0	0.016	67	25	0.386	5.95843
Aplan-10C-3676-Thy_vs_Aplan-10C-3676-Tail	chr9	53482312	53482312	G	C	Atm	c.5327C>G	p.Ser1776Trp	missense_variant	MODERATE	98	0	0.013	95	30	0.317	6.23541
Aplan-10C-3676-Thy_vs_Aplan-10C-3676-Tail	chr9	53634027	53634027	C	G	Cul5	c.1188G>C	p.Ala396Ala	synonymous_variant	LOW	73	0	0.015	57	24	0.426	6.62809
Aplan-10C-3676-Thy_vs_Aplan-10C-3676-Tail	chr9	55036405	55036405	C	G	Chrnb4	c.343G>C	p.Val115Leu	missense_variant	MODERATE	130	0	0.009577	131	36	0.294	6.44423
Aplan-10C-3676-Thy_vs_Aplan-10C-3676-Tail	chr9	56619840	56619840	C	A	Lingo1	c.1482G>T	p.Thr494Thr	synonymous_variant	LOW	29	0	0.037	23	5	0.249	1.88783
Aplan-10C-3676-Thy_vs_Aplan-10C-3676-Tail	chr9	57137538	57137538	C	G	Man2c1	c.1168C>G	p.Arg390Gly	missense_variant	MODERATE	46	0	0.026	42	21	0.512	6.50502
Aplan-10C-3676-Thy_vs_Aplan-10C-3676-Tail	chr9	57616038	57616038	C	G	Lman1l	c.235G>C	p.Gly79Arg	missense_variant	MODERATE	38	0	0.031	16	3	0.213	1.64633
Aplan-10C-3676-Thy_vs_Aplan-10C-3676-Tail	chr9	58913226	58913226	C	G	Neo1	c.2413G>C	p.Gly805Arg	missense_variant	MODERATE	79	0	0.016	71	20	0.29	6.10116
Aplan-10C-3676-Thy_vs_Aplan-10C-3676-Tail	chr9	58990415	58990415	G	C	Neo1	c.257C>G	p.Ser86Trp	missense_variant	MODERATE	24	0	0.043	31	7	0.266	1.83376
Aplan-10C-3676-Thy_vs_Aplan-10C-3676-Tail	chr9	59868193	59868193	G	C	Myo9a	c.3086G>C	p.Arg1029Pro	missense_variant	MODERATE	109	0	0.012	98	31	0.318	5.9841
Aplan-10C-3676-Thy_vs_Aplan-10C-3676-Tail	chr9	59924684	59924684	G	C	Myo9a	c.7549G>C	p.Val2517Leu	missense_variant	MODERATE	69	0	0.017	67	30	0.417	6.17519
Aplan-10C-3676-Thy_vs_Aplan-10C-3676-Tail	chr9	61408303	61408303	C	G	Tle3	c.768C>G	p.Asp256Glu	missense_variant	MODERATE	117	0	0.01	78	16	0.238	6.8098
Aplan-10C-3676-Thy_vs_Aplan-10C-3676-Tail	chr9	62272541	62272541	C	G	Spesp1	c.1084G>C	p.Val362Leu	missense_variant	MODERATE	119	0	0.01	111	39	0.345	6.09043
Aplan-10C-3676-Thy_vs_Aplan-10C-3676-Tail	chr9	63508254	63508254	C	G	Iqch	c.1735G>C	p.Val579Leu	missense_variant	MODERATE	48	0	0.024	43	15	0.351	5.55855
Aplan-10C-3676-Thy_vs_Aplan-10C-3676-Tail	chr9	70034884	70034884	G	A	Gcnt3	c.401C>T	p.Ala134Val	missense_variant	MODERATE	119	0	0.01	121	36	0.287	5.92381
Aplan-10C-3676-Thy_vs_Aplan-10C-3676-Tail	chr9	70410718	70410718	C	G	Ccnb2	c.771G>C	p.Leu257Phe	missense_variant	MODERATE	50	0	0.023	32	9	0.31	4.01903
Aplan-10C-3676-Thy_vs_Aplan-10C-3676-Tail	chr9	75194117	75194117	C	G	Myo5a	c.4138C>G	p.Arg1380Gly	missense_variant	MODERATE	32	0	0.033	20	6	0.318	2.72036
Aplan-10C-3676-Thy_vs_Aplan-10C-3676-Tail	chr9	78294842	78294842	C	G	Gm10639	c.37C>G	p.Arg13Gly	missense_variant	MODERATE	139	0	0.00911	113	28	0.266	6.1295
Aplan-10C-3676-Thy_vs_Aplan-10C-3676-Tail	chr9	79631578	79631578	C	T	Col12a1	c.7435G>A	p.Glu2479Lys	missense_variant	MODERATE	48	0	0.024	33	12	0.405	5.29956
Aplan-10C-3676-Thy_vs_Aplan-10C-3676-Tail	chr9	79633389	79633389	C	G	Col12a1	c.7313G>C	p.Arg2438Pro	missense_variant	MODERATE	70	0	0.017	71	33	0.419	6.17209
Aplan-10C-3676-Thy_vs_Aplan-10C-3676-Tail	chr9	79700279	79700279	C	A	Col12a1	c.1266G>T	p.Thr422Thr	synonymous_variant	LOW	64	0	0.02	47	16	0.349	6.7345
Aplan-10C-3676-Thy_vs_Aplan-10C-3676-Tail	chr9	79700294	79700294	C	G	Col12a1	c.1251G>C	p.Ser417Ser	synonymous_variant	LOW	62	0	0.02	47	15	0.325	6.13065
Aplan-10C-3676-Thy_vs_Aplan-10C-3676-Tail	chr9	79818994	79818994	C	G	Filip1	c.2342G>C	p.Arg781Pro	missense_variant	MODERATE	81	0	0.014	57	15	0.28	6.29546
Aplan-10C-3676-Thy_vs_Aplan-10C-3676-Tail	chr9	83423435	83423435	C	G	Lca5	c.317G>C	p.Arg106Pro	missense_variant	MODERATE	106	0	0.012	59	20	0.329	6.86797
Aplan-10C-3676-Thy_vs_Aplan-10C-3676-Tail	chr9	95404707	95404707	G	C	Chst2	c.1585C>G	p.Arg529Gly	missense_variant	MODERATE	17	0	0.067	27	5	0.222	0.856344
Aplan-10C-3676-Thy_vs_Aplan-10C-3676-Tail	chr9	95404842	95404842	G	C	Chst2	c.1450C>G	p.Arg484Gly	missense_variant	MODERATE	40	0	0.029	45	21	0.464	6.63338
Aplan-10C-3676-Thy_vs_Aplan-10C-3676-Tail	chr9	96996106	96996106	C	G	Spsb4	c.163G>C	p.Ala55Pro	missense_variant	MODERATE	40	0	0.031	25	9	0.363	4.19444
Aplan-10C-3676-Thy_vs_Aplan-10C-3676-Tail	chr9	97363344	97363344	G	C	Trim42	c.1402C>G	p.Arg468Gly	missense_variant	MODERATE	39	0	0.025	27	10	0.405	4.39809
Aplan-10C-3676-Thy_vs_Aplan-10C-3676-Tail	chr9	102041338	102041338	G	C	Ephb1	c.971C>G	p.Ser324Trp	missense_variant	MODERATE	35	0	0.031	24	3	0.2	1.20579
Aplan-10C-3676-Thy_vs_Aplan-10C-3676-Tail	chr9	102720765	102720765	G	C	Amotl2	c.623G>C	p.Arg208Pro	missense_variant	MODERATE	57	0	0.02	41	11	0.282	4.54978
Aplan-10C-3676-Thy_vs_Aplan-10C-3676-Tail	chr9	103282495	103282495	C	G	1300017J02Rik	c.216G>C	p.Ser72Ser	splice_region_variant&synonymous_variant	LOW	48	0	0.024	56	17	0.326	5.12828
Aplan-10C-3676-Thy_vs_Aplan-10C-3676-Tail	chr9	104098872	104098872	G	A	Ackr4	c.875C>T	p.Ala292Val	missense_variant	MODERATE	49	0	0.021	39	12	0.314	4.72028
Aplan-10C-3676-Thy_vs_Aplan-10C-3676-Tail	chr9	105644622	105644622	C	G	Pik3r4	c.386C>G	p.Ala129Gly	missense_variant	MODERATE	63	0	0.017	41	16	0.395	7.41071
Aplan-10C-3676-Thy_vs_Aplan-10C-3676-Tail	chr9	105881805	105881805	G	C	Col6a5	c.6201C>G	p.Tyr2067*	stop_gained	HIGH	98	0	0.012	80	20	0.272	6.07212
Aplan-10C-3676-Thy_vs_Aplan-10C-3676-Tail	chr9	106211726	106211726	C	G	Twf2	c.111C>G	p.Leu37Leu	synonymous_variant	LOW	24	0	0.045	24	5	0.227	1.30412
Aplan-10C-3676-Thy_vs_Aplan-10C-3676-Tail	chr9	106286882	106286882	C	G	Poc1a	c.558C>G	p.His186Gln	missense_variant	MODERATE	42	0	0.029	22	6	0.294	3.0021
Aplan-10C-3676-Thy_vs_Aplan-10C-3676-Tail	chr9	107682576	107682576	C	G	Sema3f	c.2211G>C	p.Pro737Pro	synonymous_variant	LOW	27	0	0.041	16	5	0.333	2.34316
Aplan-10C-3676-Thy_vs_Aplan-10C-3676-Tail	chr9	107901374	107901374	C	G	Mon1a	c.796C>G	p.Arg266Gly	missense_variant	MODERATE	46	0	0.025	30	12	0.407	5.55469
Aplan-10C-3676-Thy_vs_Aplan-10C-3676-Tail	chr9	107914267	107914267	C	G	Mst1r	c.2237C>G	p.Thr746Arg	missense_variant	MODERATE	42	0	0.025	47	12	0.285	3.57397
Aplan-10C-3676-Thy_vs_Aplan-10C-3676-Tail	chr9	107917863	107917863	C	G	Mst1r	c.3841C>G	p.Arg1281Gly	missense_variant	MODERATE	30	0	0.042	25	11	0.391	4.42884
Aplan-10C-3676-Thy_vs_Aplan-10C-3676-Tail	chr9	108054791	108054791	G	C	Amigo3	c.1412G>C	p.Arg471Pro	missense_variant	MODERATE	48	0	0.023	18	7	0.389	4.38867
Aplan-10C-3676-Thy_vs_Aplan-10C-3676-Tail	chr9	108114807	108114807	C	G	Bsn	c.3745G>C	p.Gly1249Arg	missense_variant	MODERATE	28	0	0.039	17	6	0.333	2.81831
Aplan-10C-3676-Thy_vs_Aplan-10C-3676-Tail	chr9	108561690	108561690	G	C	Impdh2	c.241G>C	p.Ala81Pro	missense_variant	MODERATE	156	0	0.007363	123	42	0.336	5.94138
Aplan-10C-3676-Thy_vs_Aplan-10C-3676-Tail	chr9	108827022	108827022	G	C	Celsr3	c.703G>C	p.Gly235Arg	missense_variant	MODERATE	40	0	0.029	24	8	0.36	3.77946
Aplan-10C-3676-Thy_vs_Aplan-10C-3676-Tail	chr9	108962235	108962235	C	G	Col7a1	c.3358C>G	p.Arg1120Gly	missense_variant	MODERATE	110	0	0.011	91	29	0.321	6.63052
Aplan-10C-3676-Thy_vs_Aplan-10C-3676-Tail	chr9	108973058	108973058	C	G	Col7a1	c.6121C>G	p.Arg2041Gly	missense_variant	MODERATE	25	0	0.038	8	4	0.444	2.76684
Aplan-10C-3676-Thy_vs_Aplan-10C-3676-Tail	chr9	108984158	108984158	C	G	Col7a1	c.8770C>G	p.Arg2924Gly	missense_variant	MODERATE	47	0	0.021	36	16	0.424	6.84975
Aplan-10C-3676-Thy_vs_Aplan-10C-3676-Tail	chr9	109111953	109111953	G	C	Plxnb1	c.4807-8G>C		splice_region_variant&intron_variant	LOW	52	0	0.021	40	10	0.272	3.92975
Aplan-10C-3676-Thy_vs_Aplan-10C-3676-Tail	chr9	110135591	110135591	C	G	Smarcc1	c.215C>G	p.Thr72Ser	missense_variant	MODERATE	57	0	0.023	67	19	0.241	5.40001
Aplan-10C-3676-Thy_vs_Aplan-10C-3676-Tail	chr9	110372280	110372280	C	G	Scap	c.336C>G	p.Val112Val	synonymous_variant	LOW	76	0	0.016	55	28	0.471	6.15636
Aplan-10C-3676-Thy_vs_Aplan-10C-3676-Tail	chr9	110634832	110634832	C	G	Nbeal2	c.3572G>C	p.Arg1191Pro	missense_variant	MODERATE	35	0	0.033	19	8	0.4	4.13881
Aplan-10C-3676-Thy_vs_Aplan-10C-3676-Tail	chr9	110798380	110798380	C	G	Prss42	c.183C>G	p.Thr61Thr	synonymous_variant	LOW	26	0	0.041	15	4	0.312	1.87035
Aplan-10C-3676-Thy_vs_Aplan-10C-3676-Tail	chr9	110884870	110884870	C	G	Als2cl	c.107C>G	p.Pro36Arg	missense_variant	MODERATE	23	0	0.045	10	5	0.5	2.97396
Aplan-10C-3676-Thy_vs_Aplan-10C-3676-Tail	chr9	111365163	111365163	C	G	Trank1	c.2254C>G	p.Arg752Gly	missense_variant	MODERATE	53	0	0.021	41	16	0.342	6.64858
Aplan-10C-3676-Thy_vs_Aplan-10C-3676-Tail	chr9	111468655	111468655	G	C	Dclk3	c.1266G>C	p.Glu422Asp	missense_variant	MODERATE	32	0	0.034	12	6	0.5	3.88307
Aplan-10C-3676-Thy_vs_Aplan-10C-3676-Tail	chr9	111468882	111468882	G	C	Dclk3	c.1493G>C	p.Arg498Pro	missense_variant	MODERATE	36	0	0.029	32	11	0.34	4.07489
Aplan-10C-3676-Thy_vs_Aplan-10C-3676-Tail	chr9	116959508	116959508	G	C	Rbms3	c.491C>G	p.Ala164Gly	missense_variant	MODERATE	34	0	0.036	39	14	0.345	4.35102
Aplan-10C-3676-Thy_vs_Aplan-10C-3676-Tail	chr9	119114979	119114979	C	G	Dlec1	c.1095C>G	p.Pro365Pro	synonymous_variant	LOW	162	0	0.007697	138	26	0.2	6.47739
Aplan-10C-3676-Thy_vs_Aplan-10C-3676-Tail	chr9	119149593	119149593	C	G	Acaa1b	c.817+7G>C		splice_region_variant&intron_variant	LOW	51	0	0.02	25	6	0.292	3.09147
Aplan-10C-3676-Thy_vs_Aplan-10C-3676-Tail	chr9	119530011	119530011	C	G	Scn5a	c.1969G>C	p.Gly657Arg	missense_variant	MODERATE	14	0	0.065	9	3	0.363	1.32394
Aplan-10C-3676-Thy_vs_Aplan-10C-3676-Tail	chr9	119780886	119780886	C	G	Scn11a	c.2895G>C	p.Ala965Ala	synonymous_variant	LOW	43	0	0.029	47	16	0.358	5.08418
Aplan-10C-3676-Thy_vs_Aplan-10C-3676-Tail	chr9	120094807	120094807	C	G	Ccr8	c.987C>G	p.Pro329Pro	synonymous_variant	LOW	40	0	0.029	38	13	0.361	4.60981
Aplan-10C-3676-Thy_vs_Aplan-10C-3676-Tail	chr9	120441508	120441508	C	G	Myrip	c.1823C>G	p.Ala608Gly	missense_variant	MODERATE	53	0	0.02	50	14	0.283	4.86553
Aplan-10C-3676-Thy_vs_Aplan-10C-3676-Tail	chr9	120453589	120453589	C	G	Myrip	c.1959C>G	p.Thr653Thr	synonymous_variant	LOW	42	0	0.026	44	13	0.331	4.05077
Aplan-10C-3676-Thy_vs_Aplan-10C-3676-Tail	chr9	121692951	121692951	C	G	Sec22c	c.305G>C	p.Cys102Ser	missense_variant	MODERATE	31	0	0.037	31	13	0.428	4.30408
Aplan-10C-3676-Thy_vs_Aplan-10C-3676-Tail	chr9	121741698	121741698	C	G	Nktr	c.505C>G	p.Arg169Gly	missense_variant	MODERATE	85	2	0.03	53	15	0.296	5.00766
Aplan-10C-3676-Thy_vs_Aplan-10C-3676-Tail	chr9	121808191	121808191	C	G	Ccdc13	c.1667G>C	p.Arg556Pro	missense_variant	MODERATE	29	0	0.037	27	4	0.208	1.32073
Aplan-10C-3676-Thy_vs_Aplan-10C-3676-Tail	chr9	122378937	122378937	C	G	Abhd5	c.895C>G	p.Arg299Gly	missense_variant	MODERATE	63	1	0.038	61	20	0.327	5.83757
Aplan-10C-3676-Thy_vs_Aplan-10C-3676-Tail	chr10	4353333	4353333	G	C	Akap12	c.457G>C	p.Gly153Arg	missense_variant	MODERATE	143	0	0.008148	135	40	0.319	6.21254
Aplan-10C-3676-Thy_vs_Aplan-10C-3676-Tail	chr10	4357610	4357610	G	C	Akap12	c.4734G>C	p.Ala1578Ala	synonymous_variant	LOW	71	0	0.014	60	14	0.268	5.14958
Aplan-10C-3676-Thy_vs_Aplan-10C-3676-Tail	chr10	4369460	4369460	G	T	Zbtb2	c.565C>A	p.Arg189Arg	synonymous_variant	LOW	89	0	0.013	73	26	0.358	5.79792
Aplan-10C-3676-Thy_vs_Aplan-10C-3676-Tail	chr10	5057884	5057884	G	T	Syne1	c.6522C>A	p.Asp2174Glu	missense_variant	MODERATE	27	0	0.036	11	5	0.417	3.03601
Aplan-10C-3676-Thy_vs_Aplan-10C-3676-Tail	chr10	7126708	7126708	G	C	Cnksr3	c.1206C>G	p.Ser402Ser	synonymous_variant	LOW	59	0	0.019	57	22	0.4	6.30275
Aplan-10C-3676-Thy_vs_Aplan-10C-3676-Tail	chr10	7853334	7853334	C	G	Zc3h12d	c.454+7C>G		splice_region_variant&intron_variant	LOW	51	0	0.023	42	8	0.216	2.93593
Aplan-10C-3676-Thy_vs_Aplan-10C-3676-Tail	chr10	8814409	8814409	C	G	Sash1	c.313G>C	p.Glu105Gln	missense_variant&splice_region_variant	MODERATE	86	0	0.014	55	14	0.255	6.22013
Aplan-10C-3676-Thy_vs_Aplan-10C-3676-Tail	chr10	12709998	12709998	C	G	Utrn	c.3034G>C	p.Glu1012Gln	missense_variant	MODERATE	112	0	0.01	104	43	0.398	6.02694
Aplan-10C-3676-Thy_vs_Aplan-10C-3676-Tail	chr10	18523830	18523830	C	G	Nhsl1	c.713C>G	p.Ser238Trp	missense_variant	MODERATE	70	0	0.017	68	22	0.327	6.1003
Aplan-10C-3676-Thy_vs_Aplan-10C-3676-Tail	chr10	18591470	18591470	C	G	Arfgef3	c.5981G>C	p.Arg1994Pro	missense_variant	MODERATE	86	0	0.013	50	22	0.434	6.58998
Aplan-10C-3676-Thy_vs_Aplan-10C-3676-Tail	chr10	18591658	18591658	C	G	Arfgef3	c.5793G>C	p.Pro1931Pro	synonymous_variant	LOW	57	0	0.02	44	10	0.22	3.88891
Aplan-10C-3676-Thy_vs_Aplan-10C-3676-Tail	chr10	18591663	18591663	C	G	Arfgef3	c.5788G>C	p.Asp1930His	missense_variant	MODERATE	53	0	0.02	45	11	0.238	4.0429
Aplan-10C-3676-Thy_vs_Aplan-10C-3676-Tail	chr10	19935005	19935005	C	G	Map3k5	c.400C>G	p.Leu134Val	missense_variant	MODERATE	15	0	0.067	9	4	0.5	1.926
Aplan-10C-3676-Thy_vs_Aplan-10C-3676-Tail	chr10	20959895	20959895	C	G	Ahi1	c.126C>G	p.Thr42Thr	synonymous_variant	LOW	52	0	0.022	36	8	0.235	3.32718
Aplan-10C-3676-Thy_vs_Aplan-10C-3676-Tail	chr10	24049691	24049691	C	G	Taar7f	c.182C>G	p.Ala61Gly	missense_variant	MODERATE	196	0	0.005254	174	52	0.29	6.10607
Aplan-10C-3676-Thy_vs_Aplan-10C-3676-Tail	chr10	39824909	39824909	C	G	Rev3l	c.5401C>G	p.Arg1801Gly	missense_variant	MODERATE	116	0	0.01	108	37	0.33	6.42764
Aplan-10C-3676-Thy_vs_Aplan-10C-3676-Tail	chr10	42197174	42197174	G	C	Foxo3	c.1346C>G	p.Thr449Ser	missense_variant	MODERATE	60	0	0.02	42	10	0.275	4.16065
Aplan-10C-3676-Thy_vs_Aplan-10C-3676-Tail	chr10	42197859	42197859	G	C	Foxo3	c.661C>G	p.Arg221Gly	missense_variant	MODERATE	19	0	0.058	14	6	0.389	2.56682
Aplan-10C-3676-Thy_vs_Aplan-10C-3676-Tail	chr10	42415553	42415553	C	G	Lace1	c.744G>C	p.Pro248Pro	synonymous_variant	LOW	40	0	0.031	25	7	0.335	3.16085
Aplan-10C-3676-Thy_vs_Aplan-10C-3676-Tail	chr10	53699036	53699036	C	G	Fam184a	c.476G>C	p.Arg159Pro	missense_variant	MODERATE	66	0	0.016	84	35	0.409	5.87578
Aplan-10C-3676-Thy_vs_Aplan-10C-3676-Tail	chr10	59192743	59192743	C	G	45179	c.91G>C	p.Asp31His	missense_variant	MODERATE	64	0	0.019	61	25	0.433	6.1352
Aplan-10C-3676-Thy_vs_Aplan-10C-3676-Tail	chr10	59416473	59416473	C	G	Pla2g12b	c.426C>G	p.Ser142Ser	synonymous_variant	LOW	25	0	0.047	34	12	0.375	3.20076
Aplan-10C-3676-Thy_vs_Aplan-10C-3676-Tail	chr10	59728101	59728101	C	G	Micu1	c.144C>G	p.Thr48Thr	synonymous_variant	LOW	30	0	0.032	31	7	0.277	1.97087
Aplan-10C-3676-Thy_vs_Aplan-10C-3676-Tail	chr10	60376853	60376853	C	G	Cdh23	c.4775G>C	p.Arg1592Pro	missense_variant	MODERATE	18	0	0.056	17	7	0.389	2.53879
Aplan-10C-3676-Thy_vs_Aplan-10C-3676-Tail	chr10	60385010	60385010	G	C	Cdh23	c.3948C>G	p.Tyr1316*	stop_gained	HIGH	39	0	0.027	38	12	0.333	4.13268
Aplan-10C-3676-Thy_vs_Aplan-10C-3676-Tail	chr10	60768380	60768380	C	G	Unc5b	c.2434G>C	p.Val812Leu	missense_variant	MODERATE	20	0	0.056	16	4	0.2	1.51008
Aplan-10C-3676-Thy_vs_Aplan-10C-3676-Tail	chr10	61271159	61271159	C	G	Adamts14	c.181G>C	p.Ala61Pro	missense_variant	MODERATE	29	0	0.042	28	12	0.454	4.36641
Aplan-10C-3676-Thy_vs_Aplan-10C-3676-Tail	chr10	61350284	61350284	G	C	Pald1	c.499C>G	p.Arg167Gly	missense_variant	MODERATE	46	0	0.025	23	6	0.286	3.07464
Aplan-10C-3676-Thy_vs_Aplan-10C-3676-Tail	chr10	68097430	68097430	C	G	Arid5b	c.2641G>C	p.Val881Leu	missense_variant	MODERATE	72	0	0.015	56	14	0.216	5.47653
Aplan-10C-3676-Thy_vs_Aplan-10C-3676-Tail	chr10	70554491	70554491	C	A	Fam13c	c.1584C>A	p.Pro528Pro	synonymous_variant	LOW	29	0	0.047	21	4	0.235	1.58523
Aplan-10C-3676-Thy_vs_Aplan-10C-3676-Tail	chr10	75585226	75585226	C	G	Ggt1	c.1274C>G	p.Ser425Trp	missense_variant	MODERATE	62	0	0.017	48	14	0.293	5.5808
Aplan-10C-3676-Thy_vs_Aplan-10C-3676-Tail	chr10	76375184	76375184	C	G	Pcnt	c.7158G>C	p.Ser2386Ser	synonymous_variant	LOW	36	0	0.033	31	10	0.321	3.74753
Aplan-10C-3676-Thy_vs_Aplan-10C-3676-Tail	chr10	76471628	76471628	C	G	Mcm3ap	c.1404C>G	p.Ala468Ala	synonymous_variant	LOW	49	0	0.026	27	6	0.23	2.86838
Aplan-10C-3676-Thy_vs_Aplan-10C-3676-Tail	chr10	76511147	76511147	C	G	Mcm3ap	c.5530C>G	p.Arg1844Gly	missense_variant	MODERATE	16	0	0.067	11	4	0.364	1.72576
Aplan-10C-3676-Thy_vs_Aplan-10C-3676-Tail	chr10	76603322	76603322	C	G	Col6a2	c.2506+7G>C		splice_region_variant&intron_variant	LOW	71	0	0.015	54	17	0.315	6.9281
Aplan-10C-3676-Thy_vs_Aplan-10C-3676-Tail	chr10	77096146	77096146	C	G	Col18a1	c.1108G>C	p.Ala370Pro	missense_variant	MODERATE	47	0	0.024	34	17	0.452	6.08375
Aplan-10C-3676-Thy_vs_Aplan-10C-3676-Tail	chr10	79783426	79783426	C	G	Prss57	c.698G>C	p.Arg233Pro	missense_variant	MODERATE	25	0	0.04	19	9	0.45	3.88504
Aplan-10C-3676-Thy_vs_Aplan-10C-3676-Tail	chr10	79827324	79827324	G	C	Misp	c.1574G>C	p.Arg525Pro	missense_variant	MODERATE	55	0	0.02	42	12	0.308	4.80932
Aplan-10C-3676-Thy_vs_Aplan-10C-3676-Tail	chr10	79972949	79972949	C	G	Grin3b	c.532C>G	p.Leu178Val	missense_variant	MODERATE	30	0	0.036	24	4	0.226	1.47366
Aplan-10C-3676-Thy_vs_Aplan-10C-3676-Tail	chr10	79975864	79975864	C	G	Grin3b	c.2202C>G	p.Ser734Arg	missense_variant	MODERATE	66	1	0.036	30	11	0.4	5.2284
Aplan-10C-3676-Thy_vs_Aplan-10C-3676-Tail	chr10	79975972	79975972	C	G	Grin3b	c.2310C>G	p.Ile770Met	missense_variant	MODERATE	62	0	0.017	41	14	0.342	6.29062
Aplan-10C-3676-Thy_vs_Aplan-10C-3676-Tail	chr10	80036583	80036583	G	C	Polr2e	c.583C>G	p.Arg195Gly	missense_variant	MODERATE	55	0	0.022	37	7	0.212	2.92989
Aplan-10C-3676-Thy_vs_Aplan-10C-3676-Tail	chr10	80061047	80061047	G	C	Sbno2	c.2434C>G	p.Arg812Gly	missense_variant	MODERATE	31	0	0.036	23	5	0.238	1.97306
Aplan-10C-3676-Thy_vs_Aplan-10C-3676-Tail	chr10	80131808	80131808	C	G	Cbarp	c.1577G>C	p.Arg526Pro	missense_variant	MODERATE	57	0	0.02	60	18	0.286	5.73065
Aplan-10C-3676-Thy_vs_Aplan-10C-3676-Tail	chr10	80549538	80549538	G	C	Rexo1	c.1685C>G	p.Ala562Gly	missense_variant	MODERATE	39	0	0.028	23	7	0.25	3.30234
Aplan-10C-3676-Thy_vs_Aplan-10C-3676-Tail	chr10	80691094	80691094	G	C	Mob3a	c.396C>G	p.Asn132Lys	missense_variant	MODERATE	40	0	0.028	28	7	0.227	2.91316
Aplan-10C-3676-Thy_vs_Aplan-10C-3676-Tail	chr10	80806703	80806703	C	G	Amh	c.815+4C>G		splice_region_variant&intron_variant	LOW	28	0	0.036	22	5	0.298	1.90556
Aplan-10C-3676-Thy_vs_Aplan-10C-3676-Tail	chr10	80904665	80904665	G	C	Lmnb2	c.1024C>G	p.Arg342Gly	missense_variant	MODERATE	42	0	0.03	19	6	0.368	3.31101
Aplan-10C-3676-Thy_vs_Aplan-10C-3676-Tail	chr10	81048437	81048437	G	A	Sgta	c.645C>T	p.Gly215Gly	synonymous_variant	LOW	40	0	0.031	25	6	0.273	2.66876
Aplan-10C-3676-Thy_vs_Aplan-10C-3676-Tail	chr10	81213339	81213339	G	C	Atcay	c.428C>G	p.Ala143Gly	missense_variant	MODERATE	29	0	0.04	20	5	0.277	2.08988
Aplan-10C-3676-Thy_vs_Aplan-10C-3676-Tail	chr10	81262752	81262752	C	T	Matk	c.1408C>T	p.Arg470Cys	missense_variant	MODERATE	15	0	0.072	11	2	0.247	0.771521
Aplan-10C-3676-Thy_vs_Aplan-10C-3676-Tail	chr10	81264939	81264939	G	C	Mrpl54	c.334C>G	p.Arg112Gly	missense_variant	MODERATE	53	0	0.023	46	13	0.27	4.78382
Aplan-10C-3676-Thy_vs_Aplan-10C-3676-Tail	chr10	84528535	84528535	C	G	Ckap4	c.663G>C	p.Thr221Thr	synonymous_variant	LOW	59	0	0.019	59	24	0.386	6.5998
Aplan-10C-3676-Thy_vs_Aplan-10C-3676-Tail	chr10	84880163	84880163	G	C	Rfx4	c.1352-7G>C		splice_region_variant&intron_variant	LOW	52	0	0.023	34	7	0.268	2.99948
Aplan-10C-3676-Thy_vs_Aplan-10C-3676-Tail	chr10	88201834	88201834	G	T	Ccdc53	c.74G>T	p.Arg25Ile	missense_variant	MODERATE	99	0	0.013	73	20	0.297	6.61624
Aplan-10C-3676-Thy_vs_Aplan-10C-3676-Tail	chr10	88201895	88201895	C	G	Ccdc53	c.135C>G	p.Ser45Ser	synonymous_variant	LOW	85	0	0.014	66	17	0.26	6.68461
Aplan-10C-3676-Thy_vs_Aplan-10C-3676-Tail	chr10	88767074	88767074	G	C	Utp20	c.5683C>G	p.Arg1895Gly	missense_variant	MODERATE	44	0	0.024	42	9	0.271	3.01339
Aplan-10C-3676-Thy_vs_Aplan-10C-3676-Tail	chr10	93531480	93531480	C	G	Amdhd1	c.811G>C	p.Glu271Gln	missense_variant&splice_region_variant	MODERATE	38	0	0.03	44	13	0.281	3.89105
Aplan-10C-3676-Thy_vs_Aplan-10C-3676-Tail	chr10	93846757	93846757	C	G	Usp44	c.1068C>G	p.Ser356Arg	missense_variant	MODERATE	68	0	0.015	53	14	0.24	5.49817
Aplan-10C-3676-Thy_vs_Aplan-10C-3676-Tail	chr10	94043970	94043970	G	C	Fgd6	c.685G>C	p.Gly229Arg	missense_variant	MODERATE	73	0	0.015	69	26	0.405	6.39056
Aplan-10C-3676-Thy_vs_Aplan-10C-3676-Tail	chr10	105370708	105370708	C	G	Tmtc2	c.725G>C	p.Arg242Pro	missense_variant	MODERATE	54	0	0.02	36	8	0.228	3.40851
Aplan-10C-3676-Thy_vs_Aplan-10C-3676-Tail	chr10	108700017	108700017	C	T	Gm5136	c.76G>A	p.Ala26Thr	missense_variant	MODERATE	102	0	0.011	55	19	0.357	6.58012
Aplan-10C-3676-Thy_vs_Aplan-10C-3676-Tail	chr10	121601313	121601313	G	C	Xpot	c.2499C>G	p.Ala833Ala	synonymous_variant	LOW	49	0	0.025	33	5	0.207	2.06057
Aplan-10C-3676-Thy_vs_Aplan-10C-3676-Tail	chr10	127237298	127237298	G	C	Kif5a	c.2022C>G	p.His674Gln	missense_variant&splice_region_variant	MODERATE	40	0	0.028	25	4	0.217	1.72852
Aplan-10C-3676-Thy_vs_Aplan-10C-3676-Tail	chr10	127283714	127283714	G	C	Mbd6	c.2638C>G	p.Arg880Gly	missense_variant	MODERATE	30	0	0.033	19	6	0.368	2.71214
Aplan-10C-3676-Thy_vs_Aplan-10C-3676-Tail	chr10	127584661	127584661	C	G	Lrp1	c.2626G>C	p.Gly876Arg	missense_variant	MODERATE	43	1	0.054	35	13	0.366	4.19194
Aplan-10C-3676-Thy_vs_Aplan-10C-3676-Tail	chr10	127590711	127590711	C	G	Lrp1	c.1828G>C	p.Val610Leu	missense_variant	MODERATE	41	0	0.028	27	8	0.318	3.52239
Aplan-10C-3676-Thy_vs_Aplan-10C-3676-Tail	chr10	127888428	127888428	C	G	Rdh7	c.186G>C	p.Thr62Thr	synonymous_variant	LOW	199	0	0.00564	166	51	0.311	6.2641
Aplan-10C-3676-Thy_vs_Aplan-10C-3676-Tail	chr10	128640245	128640245	C	G	Ikzf4	c.611G>C	p.Arg204Pro	missense_variant	MODERATE	38	0	0.032	18	6	0.352	3.24279
Aplan-10C-3676-Thy_vs_Aplan-10C-3676-Tail	chr11	5059851	5059851	G	C	Rasl10a	c.398G>C	p.Arg133Pro	missense_variant	MODERATE	27	0	0.037	21	6	0.316	2.35439
Aplan-10C-3676-Thy_vs_Aplan-10C-3676-Tail	chr11	6602697	6602697	C	G	Nacad	c.493G>C	p.Glu165Gln	missense_variant	MODERATE	25	0	0.043	19	9	0.467	3.88504
Aplan-10C-3676-Thy_vs_Aplan-10C-3676-Tail	chr11	7167120	7167120	G	C	Adcy1	c.2986G>C	p.Asp996His	missense_variant	MODERATE	54	0	0.023	35	13	0.406	5.9788
Aplan-10C-3676-Thy_vs_Aplan-10C-3676-Tail	chr11	16905356	16905356	C	G	Egfr	c.2640C>G	p.Ile880Met	missense_variant	MODERATE	124	0	0.009919	92	28	0.32	6.14118
Aplan-10C-3676-Thy_vs_Aplan-10C-3676-Tail	chr11	32227954	32227954	C	G	Mpg	c.375+5C>G		splice_region_variant&intron_variant	LOW	38	0	0.027	24	10	0.409	4.73895
Aplan-10C-3676-Thy_vs_Aplan-10C-3676-Tail	chr11	44466862	44466862	G	C	Ublcp1	c.107C>G	p.Thr36Arg	missense_variant	MODERATE	68	0	0.017	37	10	0.273	4.91813
Aplan-10C-3676-Thy_vs_Aplan-10C-3676-Tail	chr11	45984865	45984865	C	G	Sox30	c.1443C>G	p.Pro481Pro	synonymous_variant	LOW	122	0	0.009865	118	27	0.211	6.1988
Aplan-10C-3676-Thy_vs_Aplan-10C-3676-Tail	chr11	50258539	50258539	G	C	Maml1	c.2373C>G	p.Asn791Lys	missense_variant	MODERATE	29	0	0.04	28	11	0.423	3.9341
Aplan-10C-3676-Thy_vs_Aplan-10C-3676-Tail	chr11	53465276	53465276	G	C	Shroom1	c.1152G>C	p.Pro384Pro	synonymous_variant	LOW	40	0	0.029	32	8	0.31	3.05611
Aplan-10C-3676-Thy_vs_Aplan-10C-3676-Tail	chr11	58598017	58598017	C	G	Olfr324	c.626C>G	p.Thr209Arg	missense_variant	MODERATE	84	0	0.013	71	24	0.357	6.24307
Aplan-10C-3676-Thy_vs_Aplan-10C-3676-Tail	chr11	58841849	58841849	C	G	Olfr311	c.734C>G	p.Thr245Arg	missense_variant	MODERATE	235	0	0.004863	192	50	0.276	5.86179
Aplan-10C-3676-Thy_vs_Aplan-10C-3676-Tail	chr11	59076677	59076677	G	C	Obscn	c.8205C>G	p.Cys2735Trp	missense_variant	MODERATE	56	0	0.019	52	18	0.356	6.51368
Aplan-10C-3676-Thy_vs_Aplan-10C-3676-Tail	chr11	59801170	59801170	G	C	Flcn	c.652C>G	p.Arg218Gly	missense_variant	MODERATE	24	0	0.045	29	12	0.444	3.68897
Aplan-10C-3676-Thy_vs_Aplan-10C-3676-Tail	chr11	60849190	60849190	G	C	Dhrs7b	c.289G>C	p.Ala97Pro	missense_variant	MODERATE	52	0	0.026	35	18	0.467	6.90307
Aplan-10C-3676-Thy_vs_Aplan-10C-3676-Tail	chr11	67251826	67251826	G	C	Myh4	c.2812G>C	p.Ala938Pro	missense_variant	MODERATE	54	1	0.042	37	11	0.3	3.81756
Aplan-10C-3676-Thy_vs_Aplan-10C-3676-Tail	chr11	67811538	67811538	C	G	Dhrs7c	c.351C>G	p.Tyr117*	stop_gained	HIGH	80	0	0.016	55	18	0.342	6.27621
Aplan-10C-3676-Thy_vs_Aplan-10C-3676-Tail	chr11	68594319	68594319	G	C	Ccdc42	c.658G>C	p.Glu220Gln	missense_variant	MODERATE	45	0	0.026	37	11	0.335	4.21425
Aplan-10C-3676-Thy_vs_Aplan-10C-3676-Tail	chr11	68971241	68971241	C	G	Slc25a35	c.499C>G	p.Arg167Gly	missense_variant	MODERATE	28	0	0.038	19	6	0.371	2.59742
Aplan-10C-3676-Thy_vs_Aplan-10C-3676-Tail	chr11	69050994	69050994	C	G	Aurkb	c.971C>G	p.Ala324Gly	missense_variant	MODERATE	55	0	0.019	51	10	0.238	3.3967
Aplan-10C-3676-Thy_vs_Aplan-10C-3676-Tail	chr11	69101760	69101760	G	C	Per1	c.737G>C	p.Arg246Pro	missense_variant	MODERATE	57	0	0.02	47	9	0.215	3.30455
Aplan-10C-3676-Thy_vs_Aplan-10C-3676-Tail	chr11	69315372	69315372	G	C	Cntrob	c.967C>G	p.Arg323Gly	missense_variant	MODERATE	41	0	0.026	35	16	0.485	6.42611
Aplan-10C-3676-Thy_vs_Aplan-10C-3676-Tail	chr11	69879956	69879956	G	C	Kctd11	c.255C>G	p.Ser85Ser	synonymous_variant	LOW	44	0	0.026	24	10	0.391	5.17099
Aplan-10C-3676-Thy_vs_Aplan-10C-3676-Tail	chr11	70011066	70011066	G	C	Acadvl	c.1548C>G	p.Ile516Met	missense_variant	MODERATE	108	0	0.01	68	14	0.233	6.17552
Aplan-10C-3676-Thy_vs_Aplan-10C-3676-Tail	chr11	70555067	70555067	C	A	Pld2	c.2026C>A	p.Arg676Arg	synonymous_variant	LOW	84	0	0.013	65	27	0.426	6.10998
Aplan-10C-3676-Thy_vs_Aplan-10C-3676-Tail	chr11	72065590	72065590	G	C	Pitpnm3	c.1305C>G	p.His435Gln	missense_variant	MODERATE	11	0	0.079	12	2	0.248	0.320335
Aplan-10C-3676-Thy_vs_Aplan-10C-3676-Tail	chr11	72540489	72540489	G	C	Spns3	c.340C>G	p.Arg114Gly	missense_variant	MODERATE	21	0	0.05	19	7	0.4	2.5682
Aplan-10C-3676-Thy_vs_Aplan-10C-3676-Tail	chr11	74407322	74407322	C	G	Rap1gap2	c.1291G>C	p.Ala431Pro	missense_variant	MODERATE	57	0	0.02	38	13	0.353	5.8092
Aplan-10C-3676-Thy_vs_Aplan-10C-3676-Tail	chr11	75416396	75416396	G	A	Serpinf1	c.114C>T	p.Pro38Pro	synonymous_variant	LOW	16	0	0.063	16	4	0.294	0.994718
Aplan-10C-3676-Thy_vs_Aplan-10C-3676-Tail	chr11	75437384	75437384	C	G	Serpinf2	c.337G>C	p.Val113Leu	missense_variant	MODERATE	25	0	0.045	23	6	0.262	2.0848
Aplan-10C-3676-Thy_vs_Aplan-10C-3676-Tail	chr11	75563631	75563631	C	G	Slc43a2	c.1001C>G	p.Thr334Arg	missense_variant	MODERATE	50	0	0.024	36	9	0.281	3.68883
Aplan-10C-3676-Thy_vs_Aplan-10C-3676-Tail	chr11	75658420	75658420	C	G	Myo1c	c.359C>G	p.Ser120Cys	missense_variant	MODERATE	41	0	0.026	23	6	0.26	2.87082
Aplan-10C-3676-Thy_vs_Aplan-10C-3676-Tail	chr11	76508984	76508984	G	C	Abr	c.186C>G	p.Ile62Met	missense_variant	MODERATE	37	0	0.031	27	4	0.217	1.55875
Aplan-10C-3676-Thy_vs_Aplan-10C-3676-Tail	chr11	77505329	77505329	G	C	Git1	c.1645G>C	p.Glu549Gln	missense_variant	MODERATE	89	0	0.013	59	14	0.265	6.04391
Aplan-10C-3676-Thy_vs_Aplan-10C-3676-Tail	chr11	77815882	77815882	C	G	Myo18a	c.1026C>G	p.Ala342Ala	synonymous_variant	LOW	23	0	0.056	15	6	0.428	2.74161
Aplan-10C-3676-Thy_vs_Aplan-10C-3676-Tail	chr11	78221222	78221222	G	C	Supt6	c.3033C>G	p.Leu1011Leu	synonymous_variant	LOW	45	0	0.027	38	11	0.294	4.12757
Aplan-10C-3676-Thy_vs_Aplan-10C-3676-Tail	chr11	79502965	79502965	C	G	Omg	c.66G>C	p.Thr22Thr	synonymous_variant	LOW	56	0	0.02	63	25	0.372	6.32934
Aplan-10C-3676-Thy_vs_Aplan-10C-3676-Tail	chr11	80177157	80177157	G	C	Adap2	c.994G>C	p.Val332Leu	missense_variant	MODERATE	44	0	0.024	39	15	0.394	5.68477
Aplan-10C-3676-Thy_vs_Aplan-10C-3676-Tail	chr11	80223912	80223912	C	G	Rhot1	c.145C>G	p.Arg49Gly	missense_variant	MODERATE	145	0	0.008715	114	36	0.319	5.99228
Aplan-10C-3676-Thy_vs_Aplan-10C-3676-Tail	chr11	83767245	83767245	C	G	Heatr6	c.1415C>G	p.Pro472Arg	missense_variant	MODERATE	29	0	0.039	25	5	0.217	1.77469
Aplan-10C-3676-Thy_vs_Aplan-10C-3676-Tail	chr11	87600611	87600611	C	G	Mtmr4	c.401C>G	p.Ala134Gly	missense_variant	MODERATE	30	0	0.034	27	14	0.5	5.58389
Aplan-10C-3676-Thy_vs_Aplan-10C-3676-Tail	chr11	94561275	94561275	G	C	Acsf2	c.1440C>G	p.Phe480Leu	missense_variant	MODERATE	83	0	0.015	59	19	0.313	6.5196
Aplan-10C-3676-Thy_vs_Aplan-10C-3676-Tail	chr11	94572598	94572598	C	G	Acsf2	c.377G>C	p.Arg126Pro	missense_variant	MODERATE	103	0	0.012	82	32	0.429	6.09521
Aplan-10C-3676-Thy_vs_Aplan-10C-3676-Tail	chr11	96934671	96934671	C	G	Prr15l	c.126C>G	p.Asp42Glu	missense_variant	MODERATE	46	0	0.024	46	14	0.333	4.41933
Aplan-10C-3676-Thy_vs_Aplan-10C-3676-Tail	chr11	97149442	97149442	C	G	Tbkbp1	c.145G>C	p.Gly49Arg	missense_variant	MODERATE	32	0	0.034	32	10	0.343	3.06966
Aplan-10C-3676-Thy_vs_Aplan-10C-3676-Tail	chr11	97164769	97164769	G	C	Kpnb1	c.2309C>G	p.Thr770Arg	missense_variant	MODERATE	131	0	0.009584	106	30	0.285	6.19372
Aplan-10C-3676-Thy_vs_Aplan-10C-3676-Tail	chr11	97338277	97338277	C	G	Gpr179	c.3051G>C	p.Pro1017Pro	synonymous_variant	LOW	30	0	0.033	28	8	0.36	2.79008
Aplan-10C-3676-Thy_vs_Aplan-10C-3676-Tail	chr11	97338918	97338918	G	C	Gpr179	c.2410C>G	p.Arg804Gly	missense_variant	MODERATE	38	0	0.029	34	6	0.207	2.0651
Aplan-10C-3676-Thy_vs_Aplan-10C-3676-Tail	chr11	98041365	98041365	G	C	Stac2	c.711C>G	p.Asp237Glu	missense_variant	MODERATE	53	0	0.021	31	11	0.344	5.34117
Aplan-10C-3676-Thy_vs_Aplan-10C-3676-Tail	chr11	98769874	98769874	G	C	Nr1d1	c.1266C>G	p.Asn422Lys	missense_variant	MODERATE	35	0	0.029	33	15	0.4	5.63119
Aplan-10C-3676-Thy_vs_Aplan-10C-3676-Tail	chr11	98823098	98823098	C	G	Casc3	c.1155C>G	p.Pro385Pro	synonymous_variant	LOW	57	0	0.022	33	13	0.357	6.45746
Aplan-10C-3676-Thy_vs_Aplan-10C-3676-Tail	chr11	99080358	99080358	C	G	Tns4	c.525G>C	p.Pro175Pro	synonymous_variant	LOW	17	1	0.059	8	3	0.399	1.09264
Aplan-10C-3676-Thy_vs_Aplan-10C-3676-Tail	chr11	99145957	99145957	C	G	Ccr7	c.138G>C	p.Ser46Ser	synonymous_variant	LOW	89	1	0.026	71	26	0.334	6.13032
Aplan-10C-3676-Thy_vs_Aplan-10C-3676-Tail	chr11	100420516	100420516	C	G	Fkbp10	c.359C>G	p.Pro120Arg	missense_variant	MODERATE	77	0	0.016	29	9	0.307	5.51573
Aplan-10C-3676-Thy_vs_Aplan-10C-3676-Tail	chr11	100755273	100755273	C	G	Kcnh4	c.848G>C	p.Arg283Pro	missense_variant	MODERATE	16	0	0.058	21	5	0.249	1.24639
Aplan-10C-3676-Thy_vs_Aplan-10C-3676-Tail	chr11	100755777	100755777	G	C	Kcnh4	c.722C>G	p.Ala241Gly	missense_variant	MODERATE	36	0	0.03	24	6	0.291	2.57049
Aplan-10C-3676-Thy_vs_Aplan-10C-3676-Tail	chr11	100769410	100769410	G	C	Ghdc	c.510C>G	p.His170Gln	missense_variant	MODERATE	37	0	0.027	39	12	0.324	3.731
Aplan-10C-3676-Thy_vs_Aplan-10C-3676-Tail	chr11	100959057	100959057	C	G	Ptrf	c.746G>C	p.Arg249Pro	missense_variant	MODERATE	38	0	0.029	31	8	0.277	3.02527
Aplan-10C-3676-Thy_vs_Aplan-10C-3676-Tail	chr11	101119769	101119769	G	C	Fam134c	c.11C>G	p.Ala4Gly	missense_variant	MODERATE	32	0	0.037	23	6	0.286	2.45815
Aplan-10C-3676-Thy_vs_Aplan-10C-3676-Tail	chr11	101174669	101174669	C	G	Ccr10	c.34G>C	p.Gly12Arg	missense_variant	MODERATE	20	0	0.047	19	12	0.611	4.88994
Aplan-10C-3676-Thy_vs_Aplan-10C-3676-Tail	chr11	101178418	101178418	C	G	Cntnap1	c.697C>G	p.Leu233Val	missense_variant	MODERATE	41	0	0.026	39	7	0.216	2.315
Aplan-10C-3676-Thy_vs_Aplan-10C-3676-Tail	chr11	101179524	101179524	C	G	Cntnap1	c.934C>G	p.Arg312Gly	missense_variant	MODERATE	87	0	0.015	37	10	0.3	5.67067
Aplan-10C-3676-Thy_vs_Aplan-10C-3676-Tail	chr11	101180357	101180357	C	G	Cntnap1	c.1095C>G	p.Asn365Lys	missense_variant	MODERATE	51	0	0.023	40	16	0.403	6.61743
Aplan-10C-3676-Thy_vs_Aplan-10C-3676-Tail	chr11	101329373	101329373	C	G	Aoc2	c.2184C>G	p.Ala728Ala	synonymous_variant	LOW	48	0	0.024	37	7	0.218	2.68072
Aplan-10C-3676-Thy_vs_Aplan-10C-3676-Tail	chr11	101471251	101471251	G	C	Rnd2	c.629G>C	p.Arg210Pro	missense_variant	MODERATE	36	0	0.028	22	6	0.285	2.73438
Aplan-10C-3676-Thy_vs_Aplan-10C-3676-Tail	chr11	101588912	101588912	C	G	Tmem106a	c.486C>G	p.Ala162Ala	synonymous_variant	LOW	82	0	0.016	82	23	0.3	5.89147
Aplan-10C-3676-Thy_vs_Aplan-10C-3676-Tail	chr11	102018664	102018664	G	A	Mpp3	c.567C>T	p.Ile189Ile	synonymous_variant	LOW	51	0	0.026	30	7	0.269	3.2325
Aplan-10C-3676-Thy_vs_Aplan-10C-3676-Tail	chr11	102046106	102046106	C	G	Cd300lg	c.416C>G	p.Pro139Arg	missense_variant	MODERATE	33	0	0.037	21	3	0.225	1.27067
Aplan-10C-3676-Thy_vs_Aplan-10C-3676-Tail	chr11	102897073	102897073	G	C	Gfap	c.45C>G	p.Ser15Ser	synonymous_variant	LOW	30	0	0.036	33	16	0.536	5.44594
Aplan-10C-3676-Thy_vs_Aplan-10C-3676-Tail	chr11	103138763	103138763	C	G	Hexim2	c.640C>G	p.Arg214Gly	missense_variant	MODERATE	25	0	0.036	13	7	0.461	3.86655
Aplan-10C-3676-Thy_vs_Aplan-10C-3676-Tail	chr11	103231389	103231389	G	C	Map3k14	c.1394C>G	p.Pro465Arg	missense_variant	MODERATE	68	0	0.018	52	13	0.279	5.13966
Aplan-10C-3676-Thy_vs_Aplan-10C-3676-Tail	chr11	103387130	103387130	G	C	Plekhm1	c.1139C>G	p.Thr380Ser	missense_variant	MODERATE	57	0	0.021	39	15	0.417	6.71628
Aplan-10C-3676-Thy_vs_Aplan-10C-3676-Tail	chr11	106284815	106284815	G	C	Tcam1	c.903G>C	p.Arg301Ser	missense_variant	MODERATE	61	0	0.018	53	22	0.413	6.63668
Aplan-10C-3676-Thy_vs_Aplan-10C-3676-Tail	chr11	106408109	106408109	C	G	Ern1	c.1904G>C	p.Arg635Pro	missense_variant	MODERATE	68	0	0.018	56	12	0.226	4.45514
Aplan-10C-3676-Thy_vs_Aplan-10C-3676-Tail	chr11	106567180	106567180	C	T	Tex2	c.1423G>A	p.Gly475Ser	missense_variant	MODERATE	36	0	0.03	32	8	0.258	2.84682
Aplan-10C-3676-Thy_vs_Aplan-10C-3676-Tail	chr11	106782094	106782094	T	C	Ddx5	c.1604A>G	p.Tyr535Cys	missense_variant	MODERATE	176	0	0.006607	133	34	0.265	5.86198
Aplan-10C-3676-Thy_vs_Aplan-10C-3676-Tail	chr11	110499455	110499455	G	C	Map2k6	c.814G>C	p.Glu272Gln	missense_variant	MODERATE	66	0	0.018	38	7	0.212	3.22615
Aplan-10C-3676-Thy_vs_Aplan-10C-3676-Tail	chr11	113625260	113625260	C	G	Sstr2	c.1004C>G	p.Thr335Arg	missense_variant	MODERATE	30	0	0.034	21	8	0.412	3.49543
Aplan-10C-3676-Thy_vs_Aplan-10C-3676-Tail	chr11	113709471	113709471	C	G	Cpsf4l	c.19G>C	p.Gly7Arg	missense_variant	MODERATE	21	0	0.053	26	5	0.222	1.25066
Aplan-10C-3676-Thy_vs_Aplan-10C-3676-Tail	chr11	113800164	113800164	C	G	Sdk2	c.5584G>C	p.Val1862Leu	missense_variant	MODERATE	13	0	0.071	17	10	0.563	2.97413
Aplan-10C-3676-Thy_vs_Aplan-10C-3676-Tail	chr11	115393779	115393779	C	G	Cdr2l	c.940C>G	p.Arg314Gly	missense_variant	MODERATE	26	0	0.045	22	7	0.336	2.63521
Aplan-10C-3676-Thy_vs_Aplan-10C-3676-Tail	chr11	115441654	115441654	C	G	Trim80	c.671C>G	p.Thr224Arg	missense_variant	MODERATE	28	0	0.039	17	10	0.5	5.21494
Aplan-10C-3676-Thy_vs_Aplan-10C-3676-Tail	chr11	115797235	115797235	C	G	Tmem94	c.3607C>G	p.Arg1203Gly	missense_variant	MODERATE	58	0	0.018	41	15	0.39	6.53081
Aplan-10C-3676-Thy_vs_Aplan-10C-3676-Tail	chr11	115797384	115797384	C	G	Tmem94	c.3668C>G	p.Pro1223Arg	missense_variant	MODERATE	78	0	0.014	61	25	0.394	6.09189
Aplan-10C-3676-Thy_vs_Aplan-10C-3676-Tail	chr11	115845452	115845452	C	G	Llgl2	c.450C>G	p.Ser150Arg	missense_variant	MODERATE	38	0	0.03	22	11	0.556	5.68646
Aplan-10C-3676-Thy_vs_Aplan-10C-3676-Tail	chr11	115989949	115989949	G	C	Itgb4	c.2128G>C	p.Gly710Arg	missense_variant	MODERATE	65	0	0.016	53	13	0.284	4.9174
Aplan-10C-3676-Thy_vs_Aplan-10C-3676-Tail	chr11	116007073	116007073	G	C	Itgb4	c.4736G>C	p.Arg1579Pro	missense_variant	MODERATE	54	0	0.024	37	11	0.321	4.74313
Aplan-10C-3676-Thy_vs_Aplan-10C-3676-Tail	chr11	116009143	116009143	G	C	Galk1	c.849C>G	p.Ser283Arg	missense_variant	MODERATE	27	0	0.039	32	9	0.345	2.58417
Aplan-10C-3676-Thy_vs_Aplan-10C-3676-Tail	chr11	116070022	116070022	C	G	Unc13d	c.1385G>C	p.Arg462Pro	missense_variant&splice_region_variant	MODERATE	64	0	0.017	76	16	0.203	4.57683
Aplan-10C-3676-Thy_vs_Aplan-10C-3676-Tail	chr11	116147976	116147976	C	G	Fbf1	c.2395G>C	p.Val799Leu	missense_variant	MODERATE	40	0	0.027	22	7	0.285	3.45995
Aplan-10C-3676-Thy_vs_Aplan-10C-3676-Tail	chr11	116535674	116535674	G	C	Sphk1	c.455G>C	p.Arg152Pro	missense_variant	MODERATE	57	0	0.02	53	18	0.333	6.48946
Aplan-10C-3676-Thy_vs_Aplan-10C-3676-Tail	chr11	117835002	117835002	C	G	Afmid	c.445C>G	p.Arg149Gly	missense_variant	MODERATE	78	0	0.014	50	17	0.342	6.19347
Aplan-10C-3676-Thy_vs_Aplan-10C-3676-Tail	chr11	117864197	117864197	C	G	Tmem235	c.474C>G	p.Gly158Gly	synonymous_variant	LOW	36	0	0.034	22	6	0.316	2.73438
Aplan-10C-3676-Thy_vs_Aplan-10C-3676-Tail	chr11	118041068	118041068	C	G	Dnah17	c.11077G>C	p.Glu3693Gln	missense_variant	MODERATE	45	0	0.026	38	11	0.318	4.12757
Aplan-10C-3676-Thy_vs_Aplan-10C-3676-Tail	chr11	119028549	119028549	C	G	Cbx2	c.939C>G	p.Pro313Pro	synonymous_variant	LOW	21	0	0.056	14	5	0.389	2.20993
Aplan-10C-3676-Thy_vs_Aplan-10C-3676-Tail	chr11	119080899	119080899	G	C	Cbx4	c.1649C>G	p.Thr550Arg	missense_variant	MODERATE	20	0	0.056	12	6	0.5	2.99155
Aplan-10C-3676-Thy_vs_Aplan-10C-3676-Tail	chr11	119888584	119888584	C	G	Rptor	c.3183C>G	p.His1061Gln	missense_variant	MODERATE	53	1	0.044	40	12	0.305	3.9255
Aplan-10C-3676-Thy_vs_Aplan-10C-3676-Tail	chr11	120009425	120009425	C	G	Aatk	c.3934G>C	p.Ala1312Pro	missense_variant	MODERATE	31	0	0.035	20	10	0.5	4.83985
Aplan-10C-3676-Thy_vs_Aplan-10C-3676-Tail	chr11	120009946	120009946	C	G	Aatk	c.3623G>C	p.Arg1208Pro	missense_variant	MODERATE	30	0	0.036	44	14	0.351	3.3532
Aplan-10C-3676-Thy_vs_Aplan-10C-3676-Tail	chr11	120810918	120810918	G	C	Fasn	c.5740C>G	p.Arg1914Gly	missense_variant	MODERATE	29	0	0.038	13	3	0.265	1.60358
Aplan-10C-3676-Thy_vs_Aplan-10C-3676-Tail	chr12	3451711	3451711	C	G	Asxl2	c.193C>G	p.Arg65Gly	missense_variant	MODERATE	43	0	0.028	46	14	0.299	4.3799
Aplan-10C-3676-Thy_vs_Aplan-10C-3676-Tail	chr12	3502243	3502243	C	G	Asxl2	c.4128C>G	p.Ile1376Met	missense_variant	MODERATE	114	1	0.02	122	41	0.37	6.09152
Aplan-10C-3676-Thy_vs_Aplan-10C-3676-Tail	chr12	4630637	4630637	C	G	Itsn2	c.657C>G	p.Ser219Arg	missense_variant&splice_region_variant	MODERATE	43	0	0.026	47	16	0.333	5.08418
Aplan-10C-3676-Thy_vs_Aplan-10C-3676-Tail	chr12	4851885	4851885	C	G	BC068281	c.1740C>G	p.Arg580Arg	synonymous_variant	LOW	37	0	0.027	61	21	0.347	4.77888
Aplan-10C-3676-Thy_vs_Aplan-10C-3676-Tail	chr12	7990778	7990778	C	G	Apob	c.1902C>G	p.Ser634Ser	synonymous_variant	LOW	141	0	0.008574	101	22	0.264	6.12258
Aplan-10C-3676-Thy_vs_Aplan-10C-3676-Tail	chr12	11241311	11241311	G	C	Gen1	c.2671C>G	p.Arg891Gly	missense_variant	MODERATE	103	0	0.012	107	32	0.318	6.32334
Aplan-10C-3676-Thy_vs_Aplan-10C-3676-Tail	chr12	13374768	13374768	C	G	Nbas	c.3007C>G	p.Arg1003Gly	missense_variant	MODERATE	63	0	0.019	61	27	0.419	6.34541
Aplan-10C-3676-Thy_vs_Aplan-10C-3676-Tail	chr12	29895240	29895240	G	C	Myt1l	c.3009G>C	p.Thr1003Thr	synonymous_variant	LOW	24	0	0.042	15	4	0.233	1.78001
Aplan-10C-3676-Thy_vs_Aplan-10C-3676-Tail	chr12	31464890	31464890	C	G	Slc26a3	c.1617C>G	p.Phe539Leu	missense_variant	MODERATE	90	0	0.014	108	31	0.287	6.158
Aplan-10C-3676-Thy_vs_Aplan-10C-3676-Tail	chr12	35144124	35144124	C	G	Snx13	c.2665C>G	p.Arg889Gly	missense_variant	MODERATE	101	0	0.011	105	38	0.371	5.87602
Aplan-10C-3676-Thy_vs_Aplan-10C-3676-Tail	chr12	40623798	40623798	C	A	Dock4	c.122-5C>A		splice_region_variant&intron_variant	LOW	88	0	0.014	51	16	0.319	6.11886
Aplan-10C-3676-Thy_vs_Aplan-10C-3676-Tail	chr12	55676829	55676829	C	T	Ralgapa1	c.4911G>A	p.Pro1637Pro	synonymous_variant	LOW	126	0	0.009288	92	32	0.354	6.56608
Aplan-10C-3676-Thy_vs_Aplan-10C-3676-Tail	chr12	59108291	59108291	C	G	Mia2	c.792C>G	p.His264Gln	missense_variant	MODERATE	54	0	0.02	50	11	0.251	3.77606
Aplan-10C-3676-Thy_vs_Aplan-10C-3676-Tail	chr12	65102629	65102629	C	G	Fancm	c.2168C>G	p.Pro723Arg	missense_variant	MODERATE	99	0	0.012	105	39	0.345	6.23222
Aplan-10C-3676-Thy_vs_Aplan-10C-3676-Tail	chr12	65225909	65225909	C	G	Wdr20rt	c.145C>G	p.Arg49Gly	missense_variant	MODERATE	109	0	0.011	98	26	0.286	6.1421
Aplan-10C-3676-Thy_vs_Aplan-10C-3676-Tail	chr12	65225933	65225933	G	A	Wdr20rt	c.169G>A	p.Asp57Asn	missense_variant	MODERATE	102	0	0.011	97	29	0.315	5.94552
Aplan-10C-3676-Thy_vs_Aplan-10C-3676-Tail	chr12	70211075	70211075	G	C	Pygl	c.612C>G	p.Tyr204*	stop_gained	HIGH	50	0	0.026	40	9	0.242	3.4121
Aplan-10C-3676-Thy_vs_Aplan-10C-3676-Tail	chr12	70864124	70864124	C	G	Frmd6	c.81C>G	p.Ser27Ser	synonymous_variant	LOW	117	0	0.011	80	29	0.358	6.13936
Aplan-10C-3676-Thy_vs_Aplan-10C-3676-Tail	chr12	72555542	72555542	C	G	Pcnx4	c.804C>G	p.Asp268Glu	missense_variant	MODERATE	123	0	0.01	92	26	0.333	6.2647
Aplan-10C-3676-Thy_vs_Aplan-10C-3676-Tail	chr12	75973378	75973378	C	G	Syne2	c.10287C>G	p.Cys3429Trp	missense_variant	MODERATE	41	0	0.028	32	8	0.251	3.10652
Aplan-10C-3676-Thy_vs_Aplan-10C-3676-Tail	chr12	75973396	75973396	C	G	Syne2	c.10305C>G	p.Ser3435Ser	synonymous_variant	LOW	39	0	0.029	30	12	0.407	5.00824
Aplan-10C-3676-Thy_vs_Aplan-10C-3676-Tail	chr12	76072156	76072156	C	G	Syne2	c.17546C>G	p.Thr5849Arg	missense_variant	MODERATE	65	0	0.02	39	12	0.313	5.64543
Aplan-10C-3676-Thy_vs_Aplan-10C-3676-Tail	chr12	76105051	76105051	C	G	Syne2	c.19833C>G	p.Pro6611Pro	synonymous_variant	LOW	41	0	0.029	35	13	0.345	5.01472
Aplan-10C-3676-Thy_vs_Aplan-10C-3676-Tail	chr12	76106043	76106043	C	G	Syne2	c.20002C>G	p.Arg6668Gly	missense_variant	MODERATE	18	0	0.067	8	2	0.3	1.06473
Aplan-10C-3676-Thy_vs_Aplan-10C-3676-Tail	chr12	76349695	76349695	C	G	Zbtb25	c.752G>C	p.Arg251Pro	missense_variant	MODERATE	66	0	0.017	53	15	0.314	5.82101
Aplan-10C-3676-Thy_vs_Aplan-10C-3676-Tail	chr12	81724252	81724252	C	G	Map3k9	c.2561G>C	p.Arg854Pro	missense_variant	MODERATE	42	0	0.027	45	18	0.429	5.96829
Aplan-10C-3676-Thy_vs_Aplan-10C-3676-Tail	chr12	81743919	81743919	C	G	Map3k9	c.859G>C	p.Asp287His	missense_variant	MODERATE	40	0	0.028	32	12	0.367	4.83277
Aplan-10C-3676-Thy_vs_Aplan-10C-3676-Tail	chr12	81918073	81918073	C	G	Pcnx	c.1013C>G	p.Pro338Arg	missense_variant	MODERATE	36	0	0.028	31	14	0.444	5.56707
Aplan-10C-3676-Thy_vs_Aplan-10C-3676-Tail	chr12	81918193	81918193	C	G	Pcnx	c.1133C>G	p.Thr378Arg	missense_variant	MODERATE	34	0	0.034	39	11	0.337	3.25853
Aplan-10C-3676-Thy_vs_Aplan-10C-3676-Tail	chr12	81964119	81964119	C	G	Pcnx	c.3649C>G	p.Arg1217Gly	missense_variant	MODERATE	52	0	0.021	29	13	0.48	6.74284
Aplan-10C-3676-Thy_vs_Aplan-10C-3676-Tail	chr12	81996153	81996153	C	G	Pcnx	c.7026C>G	p.Ala2342Ala	synonymous_variant	LOW	80	0	0.015	51	16	0.307	7.28541
Aplan-10C-3676-Thy_vs_Aplan-10C-3676-Tail	chr12	83770416	83770416	C	G	Papln	c.59C>G	p.Ala20Gly	missense_variant&splice_region_variant	MODERATE	9	0	0.091	15	7	0.428	1.65097
Aplan-10C-3676-Thy_vs_Aplan-10C-3676-Tail	chr12	83783648	83783648	G	C	Papln	c.3038-5G>C		splice_region_variant&intron_variant	LOW	70	0	0.018	37	10	0.286	5.00378
Aplan-10C-3676-Thy_vs_Aplan-10C-3676-Tail	chr12	83783687	83783687	G	C	Papln	c.3072G>C	p.Pro1024Pro	synonymous_variant	LOW	63	0	0.021	35	11	0.306	5.42902
Aplan-10C-3676-Thy_vs_Aplan-10C-3676-Tail	chr12	83795988	83795988	C	G	Numb	c.1413G>C	p.Pro471Pro	synonymous_variant	LOW	32	0	0.033	26	8	0.32	3.08882
Aplan-10C-3676-Thy_vs_Aplan-10C-3676-Tail	chr12	83992782	83992782	C	G	Acot2	c.1064C>G	p.Thr355Arg	missense_variant	MODERATE	126	0	0.009253	83	21	0.269	6.23731
Aplan-10C-3676-Thy_vs_Aplan-10C-3676-Tail	chr12	84075678	84075678	C	G	Acot5	c.1035C>G	p.His345Gln	missense_variant	MODERATE	89	0	0.014	60	14	0.264	5.97137
Aplan-10C-3676-Thy_vs_Aplan-10C-3676-Tail	chr12	84106487	84106487	G	C	Acot6	c.502G>C	p.Gly168Arg	missense_variant	MODERATE	58	0	0.02	47	11	0.244	4.15548
Aplan-10C-3676-Thy_vs_Aplan-10C-3676-Tail	chr12	84152893	84152893	C	G	Elmsan1	c.3052G>C	p.Glu1018Gln	missense_variant	MODERATE	48	0	0.024	31	9	0.348	4.00898
Aplan-10C-3676-Thy_vs_Aplan-10C-3676-Tail	chr12	84173693	84173693	C	G	Elmsan1	c.486G>C	p.Pro162Pro	synonymous_variant	LOW	26	0	0.038	24	12	0.484	4.65219
Aplan-10C-3676-Thy_vs_Aplan-10C-3676-Tail	chr12	84348664	84348664	C	G	Fam161b	c.1504G>C	p.Ala502Pro	missense_variant	MODERATE	89	0	0.012	94	25	0.286	6.40586
Aplan-10C-3676-Thy_vs_Aplan-10C-3676-Tail	chr12	84396691	84396691	G	C	Entpd5	c.277C>G	p.Gln93Glu	missense_variant	MODERATE	39	0	0.028	35	15	0.4	5.74942
Aplan-10C-3676-Thy_vs_Aplan-10C-3676-Tail	chr12	84396732	84396732	G	C	Entpd5	c.236C>G	p.Ala79Gly	missense_variant	MODERATE	45	0	0.024	41	14	0.363	5.10986
Aplan-10C-3676-Thy_vs_Aplan-10C-3676-Tail	chr12	85014915	85014915	C	G	Ylpm1	c.1589C>G	p.Pro530Arg	missense_variant	MODERATE	65	0	0.019	76	29	0.396	5.84989
Aplan-10C-3676-Thy_vs_Aplan-10C-3676-Tail	chr12	86717778	86717778	G	A	Angel1	c.1435C>T	p.Pro479Ser	missense_variant	MODERATE	35	0	0.032	31	8	0.292	2.86218
Aplan-10C-3676-Thy_vs_Aplan-10C-3676-Tail	chr12	87254237	87254237	C	G	Vipas39	c.491G>C	p.Arg164Pro	missense_variant	MODERATE	89	0	0.015	64	23	0.342	5.95168
Aplan-10C-3676-Thy_vs_Aplan-10C-3676-Tail	chr12	98231440	98231440	C	G	Galc	c.1009G>C	p.Val337Leu	missense_variant	MODERATE	66	1	0.02	60	17	0.266	4.92386
Aplan-10C-3676-Thy_vs_Aplan-10C-3676-Tail	chr12	98496301	98496301	C	G	Kcnk10	c.397G>C	p.Asp133His	missense_variant	MODERATE	36	1	0.064	32	11	0.31	3.07533
Aplan-10C-3676-Thy_vs_Aplan-10C-3676-Tail	chr12	98518827	98518827	C	G	Kcnk10	c.58G>C	p.Val20Leu	missense_variant	MODERATE	25	0	0.039	27	8	0.28	2.3578
Aplan-10C-3676-Thy_vs_Aplan-10C-3676-Tail	chr12	100913468	100913468	G	C	Ccdc88c	c.5372C>G	p.Ala1791Gly	missense_variant	MODERATE	20	0	0.059	13	2	0.214	0.830539
Aplan-10C-3676-Thy_vs_Aplan-10C-3676-Tail	chr12	102387658	102387658	C	G	Rin3	c.2563C>G	p.His855Asp	missense_variant	MODERATE	36	0	0.031	27	14	0.524	6.27043
Aplan-10C-3676-Thy_vs_Aplan-10C-3676-Tail	chr12	102387680	102387680	C	G	Rin3	c.2585C>G	p.Thr862Arg	missense_variant	MODERATE	33	0	0.034	27	14	0.478	5.9369
Aplan-10C-3676-Thy_vs_Aplan-10C-3676-Tail	chr12	102742374	102742374	G	C	Moap1	c.915C>G	p.Val305Val	synonymous_variant	LOW	114	0	0.009805	99	30	0.298	6.16731
Aplan-10C-3676-Thy_vs_Aplan-10C-3676-Tail	chr12	103168396	103168396	C	G	Unc79	c.7031C>G	p.Ala2344Gly	missense_variant	MODERATE	47	0	0.024	36	9	0.283	3.543
Aplan-10C-3676-Thy_vs_Aplan-10C-3676-Tail	chr12	103440009	103440009	C	G	Ifi27	c.621C>G	p.Ala207Ala	synonymous_variant	LOW	48	0	0.024	33	7	0.214	2.9106
Aplan-10C-3676-Thy_vs_Aplan-10C-3676-Tail	chr12	104132984	104132984	C	G	Serpina3b	c.757C>G	p.Arg253Gly	missense_variant	MODERATE	139	1	0.009005	111	35	0.317	6.06112
Aplan-10C-3676-Thy_vs_Aplan-10C-3676-Tail	chr12	104782210	104782210	C	G	Clmn	c.1077G>C	p.Pro359Pro	synonymous_variant	LOW	38	0	0.027	49	18	0.364	5.17029
Aplan-10C-3676-Thy_vs_Aplan-10C-3676-Tail	chr12	105592011	105592011	C	G	Bdkrb2	c.510C>G	p.Arg170Arg	synonymous_variant	LOW	88	1	0.013	45	15	0.375	6.7617
Aplan-10C-3676-Thy_vs_Aplan-10C-3676-Tail	chr12	108193739	108193739	C	G	Ccnk	c.479C>G	p.Pro160Arg	missense_variant	MODERATE	127	0	0.009702	103	23	0.212	6.28932
Aplan-10C-3676-Thy_vs_Aplan-10C-3676-Tail	chr12	108537389	108537389	C	G	Eml1	c.2244C>G	p.His748Gln	missense_variant	MODERATE	30	0	0.036	12	7	0.615	4.53229
Aplan-10C-3676-Thy_vs_Aplan-10C-3676-Tail	chr12	108861328	108861328	C	G	Wars	c.1365G>C	p.Ala455Ala	synonymous_variant	LOW	37	0	0.031	30	13	0.458	5.32604
Aplan-10C-3676-Thy_vs_Aplan-10C-3676-Tail	chr12	109026538	109026538	C	G	Wdr25	c.1374C>G	p.Tyr458*	stop_gained	HIGH	59	0	0.022	42	13	0.346	5.50488
Aplan-10C-3676-Thy_vs_Aplan-10C-3676-Tail	chr12	109033662	109033662	C	G	Begain	c.1182G>C	p.Pro394Pro	synonymous_variant	LOW	12	0	0.073	5	3	0.571	1.83251
Aplan-10C-3676-Thy_vs_Aplan-10C-3676-Tail	chr12	110617739	110617739	C	G	Dync1h1	c.1575C>G	p.Tyr525*	stop_gained	HIGH	49	0	0.024	38	12	0.333	4.81631
Aplan-10C-3676-Thy_vs_Aplan-10C-3676-Tail	chr12	111345581	111345581	C	G	Cdc42bpb	c.218G>C	p.Arg73Pro	missense_variant	MODERATE	28	0	0.037	15	4	0.313	1.95622
Aplan-10C-3676-Thy_vs_Aplan-10C-3676-Tail	chr12	111543222	111543222	C	G	Eif5	c.1023C>G	p.Ala341Ala	synonymous_variant	LOW	38	0	0.027	36	10	0.281	3.45122
Aplan-10C-3676-Thy_vs_Aplan-10C-3676-Tail	chr12	111669879	111669879	G	C	Ckb	c.913C>G	p.His305Asp	missense_variant	MODERATE	33	0	0.032	30	10	0.347	3.62878
Aplan-10C-3676-Thy_vs_Aplan-10C-3676-Tail	chr12	111778059	111778059	C	G	Klc1	c.837C>G	p.Asn279Lys	missense_variant	MODERATE	97	0	0.012	72	29	0.413	6.26617
Aplan-10C-3676-Thy_vs_Aplan-10C-3676-Tail	chr12	112680543	112680543	G	C	Zbtb42	c.1151G>C	p.Arg384Pro	missense_variant	MODERATE	48	0	0.025	25	6	0.303	2.98282
Aplan-10C-3676-Thy_vs_Aplan-10C-3676-Tail	chr12	112736733	112736733	G	C	Cep170b	c.1629G>C	p.Pro543Pro	synonymous_variant	LOW	25	0	0.05	27	6	0.28	1.63378
Aplan-10C-3676-Thy_vs_Aplan-10C-3676-Tail	chr12	113088562	113088562	G	C	Tex22	c.239G>C	p.Arg80Pro	missense_variant	MODERATE	13	0	0.075	19	7	0.35	1.59917
Aplan-10C-3676-Thy_vs_Aplan-10C-3676-Tail	chr12	113127627	113127627	C	G	Mta1	c.615C>G	p.Thr205Thr	synonymous_variant	LOW	17	0	0.063	8	2	0.3	1.02996
Aplan-10C-3676-Thy_vs_Aplan-10C-3676-Tail	chr12	113136360	113136360	C	G	Mta1	c.1874C>G	p.Pro625Arg	missense_variant	MODERATE	79	0	0.015	42	12	0.268	6.02464
Aplan-10C-3676-Thy_vs_Aplan-10C-3676-Tail	chr12	118043803	118043803	C	G	Dnah11	c.6439G>C	p.Val2147Leu	missense_variant	MODERATE	102	0	0.012	67	19	0.32	6.7974
Aplan-10C-3676-Thy_vs_Aplan-10C-3676-Tail	chr12	118127484	118127484	C	G	Dnah11	c.2912G>C	p.Arg971Pro	missense_variant	MODERATE	74	0	0.015	76	28	0.308	6.47599
Aplan-10C-3676-Thy_vs_Aplan-10C-3676-Tail	chr13	9150881	9150881	G	C	Larp4b	c.884G>C	p.Arg295Pro	missense_variant	MODERATE	96	0	0.013	82	24	0.269	6.07937
Aplan-10C-3676-Thy_vs_Aplan-10C-3676-Tail	chr13	11829608	11829608	C	G	Ryr2	c.1241G>C	p.Arg414Pro	missense_variant	MODERATE	69	0	0.018	58	25	0.413	6.10283
Aplan-10C-3676-Thy_vs_Aplan-10C-3676-Tail	chr13	13363536	13363536	C	G	Gpr137b	c.829G>C	p.Val277Leu	missense_variant	MODERATE	74	0	0.016	40	16	0.417	6.62765
Aplan-10C-3676-Thy_vs_Aplan-10C-3676-Tail	chr13	13465484	13465484	G	C	Nid1	c.700G>C	p.Gly234Arg	missense_variant	MODERATE	37	0	0.03	30	10	0.392	3.91667
Aplan-10C-3676-Thy_vs_Aplan-10C-3676-Tail	chr13	19137724	19137724	C	G	Amph	c.1584C>G	p.Pro528Pro	synonymous_variant	LOW	19	0	0.054	21	11	0.476	3.7322
Aplan-10C-3676-Thy_vs_Aplan-10C-3676-Tail	chr13	19627129	19627129	G	C	Sfrp4	c.616G>C	p.Val206Leu	missense_variant	MODERATE	57	0	0.019	51	13	0.289	4.63587
Aplan-10C-3676-Thy_vs_Aplan-10C-3676-Tail	chr13	21750484	21750484	C	G	Hist1h4k	c.22G>C	p.Gly8Arg	missense_variant	MODERATE	67	0	0.017	27	8	0.346	4.70019
Aplan-10C-3676-Thy_vs_Aplan-10C-3676-Tail	chr13	21780336	21780336	C	G	Hist1h1b	c.219G>C	p.Val73Val	synonymous_variant	LOW	49	0	0.025	27	10	0.333	5.05364
Aplan-10C-3676-Thy_vs_Aplan-10C-3676-Tail	chr13	22524885	22524885	C	G	Vmn1r203	c.835C>G	p.Arg279Gly	missense_variant	MODERATE	209	0	0.005553	216	79	0.348	5.78673
Aplan-10C-3676-Thy_vs_Aplan-10C-3676-Tail	chr13	23249333	23249333	C	G	Vmn1r223	c.96C>G	p.His32Gln	missense_variant	MODERATE	172	1	0.007157	150	49	0.334	5.71112
Aplan-10C-3676-Thy_vs_Aplan-10C-3676-Tail	chr13	23573931	23573931	C	G	Hist1h2bf	c.260G>C	p.Arg87Pro	missense_variant	MODERATE	102	0	0.012	77	28	0.364	5.89743
Aplan-10C-3676-Thy_vs_Aplan-10C-3676-Tail	chr13	23705705	23705705	C	G	Hfe	c.958G>C	p.Gly320Arg	missense_variant	MODERATE	112	0	0.012	83	23	0.293	5.87723
Aplan-10C-3676-Thy_vs_Aplan-10C-3676-Tail	chr13	23764212	23764212	C	G	Hist1h1a	c.496C>G	p.Pro166Ala	missense_variant	MODERATE	27	0	0.04	23	10	0.428	3.95322
Aplan-10C-3676-Thy_vs_Aplan-10C-3676-Tail	chr13	23933799	23933799	C	G	Hist1h2ba	c.358G>C	p.Val120Leu	missense_variant	MODERATE	32	0	0.034	35	12	0.375	3.75253
Aplan-10C-3676-Thy_vs_Aplan-10C-3676-Tail	chr13	23953950	23953950	C	G	Scgn	c.737G>C	p.Arg246Pro	missense_variant	MODERATE	58	0	0.02	40	12	0.316	5.16256
Aplan-10C-3676-Thy_vs_Aplan-10C-3676-Tail	chr13	36988966	36988966	C	G	F13a1	c.439G>C	p.Val147Leu	missense_variant	MODERATE	73	0	0.015	59	20	0.33	6.34661
Aplan-10C-3676-Thy_vs_Aplan-10C-3676-Tail	chr13	38022639	38022639	G	C	Cage1	c.1547C>G	p.Ser516Trp	missense_variant	MODERATE	70	2	0.035	61	24	0.382	5.87177
Aplan-10C-3676-Thy_vs_Aplan-10C-3676-Tail	chr13	38192946	38192946	C	G	Dsp	c.4706C>G	p.Thr1569Arg	missense_variant	MODERATE	32	0	0.033	23	7	0.333	2.9179
Aplan-10C-3676-Thy_vs_Aplan-10C-3676-Tail	chr13	45557277	45557277	G	C	Atxn1	c.2178C>G	p.Gly726Gly	synonymous_variant	LOW	53	1	0.042	63	31	0.423	6.16777
Aplan-10C-3676-Thy_vs_Aplan-10C-3676-Tail	chr13	53130932	53130932	G	C	Ror2	c.479C>G	p.Pro160Arg	missense_variant	MODERATE	36	0	0.029	42	16	0.385	4.9954
Aplan-10C-3676-Thy_vs_Aplan-10C-3676-Tail	chr13	54991016	54991016	C	T	Unc5a	c.207C>T	p.Pro69Pro	synonymous_variant	LOW	22	0	0.053	20	8	0.412	2.97173
Aplan-10C-3676-Thy_vs_Aplan-10C-3676-Tail	chr13	55625034	55625034	C	G	Caml	c.490C>G	p.Arg164Gly	missense_variant	MODERATE	46	0	0.023	59	18	0.312	5.0267
Aplan-10C-3676-Thy_vs_Aplan-10C-3676-Tail	chr13	55638057	55638057	C	G	Ddx46	c.49C>G	p.Arg17Gly	missense_variant	MODERATE	60	0	0.021	35	9	0.3	4.22118
Aplan-10C-3676-Thy_vs_Aplan-10C-3676-Tail	chr13	56084263	56084263	G	C	H2afy	c.711C>G	p.Gly237Gly	synonymous_variant	LOW	80	0	0.015	52	24	0.45	6.91212
Aplan-10C-3676-Thy_vs_Aplan-10C-3676-Tail	chr13	57440323	57440323	G	C	Spock1	c.935C>G	p.Ala312Gly	missense_variant&splice_region_variant	MODERATE	27	0	0.042	24	6	0.285	2.12647
Aplan-10C-3676-Thy_vs_Aplan-10C-3676-Tail	chr13	58009419	58009419	C	G	Klhl3	c.1752G>C	p.Gly584Gly	splice_region_variant&synonymous_variant	LOW	55	0	0.02	31	10	0.333	4.9022
Aplan-10C-3676-Thy_vs_Aplan-10C-3676-Tail	chr13	58191830	58191830	C	G	Ubqln1	c.979G>C	p.Gly327Arg	missense_variant	MODERATE	51	0	0.022	39	11	0.293	4.39485
Aplan-10C-3676-Thy_vs_Aplan-10C-3676-Tail	chr13	58344624	58344624	G	C	Kif27	c.700C>G	p.Arg234Gly	missense_variant	MODERATE	89	0	0.013	63	14	0.222	5.76461
Aplan-10C-3676-Thy_vs_Aplan-10C-3676-Tail	chr13	59701268	59701268	G	C	Spata31d1a	c.3045C>G	p.Gly1015Gly	synonymous_variant	LOW	109	0	0.011	84	30	0.351	6.49847
Aplan-10C-3676-Thy_vs_Aplan-10C-3676-Tail	chr13	59703377	59703377	G	C	Spata31d1a	c.936C>G	p.Tyr312*	stop_gained	HIGH	126	0	0.009577	68	13	0.215	6.27216
Aplan-10C-3676-Thy_vs_Aplan-10C-3676-Tail	chr13	63190511	63190511	C	G	2010111I01Rik	c.1700C>G	p.Ala567Gly	missense_variant	MODERATE	78	0	0.016	59	20	0.333	6.66681
Aplan-10C-3676-Thy_vs_Aplan-10C-3676-Tail	chr13	63325571	63325571	G	C	Fancc	c.1055C>G	p.Ala352Gly	missense_variant	MODERATE	40	0	0.027	28	5	0.217	2.02557
Aplan-10C-3676-Thy_vs_Aplan-10C-3676-Tail	chr13	63899356	63899356	G	C	Ercc6l2	c.4467G>C	p.Thr1489Thr	synonymous_variant	LOW	61	0	0.019	56	22	0.38	6.50684
Aplan-10C-3676-Thy_vs_Aplan-10C-3676-Tail	chr13	64059462	64059462	G	C	Hsd17b3	c.764C>G	p.Thr255Arg	missense_variant	MODERATE	71	0	0.017	58	24	0.397	6.57104
Aplan-10C-3676-Thy_vs_Aplan-10C-3676-Tail	chr13	64219903	64219903	C	G	Cdc14b	c.610G>C	p.Glu204Gln	missense_variant	MODERATE	75	0	0.017	73	23	0.305	5.95186
Aplan-10C-3676-Thy_vs_Aplan-10C-3676-Tail	chr13	65195483	65195483	C	G	Nlrp4f	c.347G>C	p.Arg116Pro	missense_variant	MODERATE	93	0	0.013	109	38	0.351	5.93523
Aplan-10C-3676-Thy_vs_Aplan-10C-3676-Tail	chr13	66974532	66974532	G	C	Ptdss1	c.982G>C	p.Gly328Arg	missense_variant	MODERATE	86	0	0.015	59	19	0.334	6.68893
Aplan-10C-3676-Thy_vs_Aplan-10C-3676-Tail	chr13	73646273	73646273	G	C	Tert	c.2915G>C	p.Arg972Pro	missense_variant	MODERATE	49	0	0.024	41	13	0.344	4.96973
Aplan-10C-3676-Thy_vs_Aplan-10C-3676-Tail	chr13	75910898	75910898	G	C	Rhobtb3	c.780C>G	p.His260Gln	missense_variant	MODERATE	60	2	0.036	55	20	0.361	5.2063
Aplan-10C-3676-Thy_vs_Aplan-10C-3676-Tail	chr13	75998596	75998596	G	C	Spata9	c.586G>C	p.Ala196Pro	missense_variant	MODERATE	54	0	0.021	59	14	0.245	4.21949
Aplan-10C-3676-Thy_vs_Aplan-10C-3676-Tail	chr13	81155250	81155250	C	G	Adgrv1	c.18316G>C	p.Ala6106Pro	missense_variant	MODERATE	80	0	0.016	76	31	0.372	5.82987
Aplan-10C-3676-Thy_vs_Aplan-10C-3676-Tail	chr13	81543535	81543535	G	C	Adgrv1	c.4932C>G	p.Tyr1644*	stop_gained	HIGH	117	0	0.011	93	22	0.25	5.95612
Aplan-10C-3676-Thy_vs_Aplan-10C-3676-Tail	chr13	89685136	89685136	C	G	Vcan	c.9196G>C	p.Glu3066Gln	missense_variant	MODERATE	43	0	0.03	27	12	0.458	5.78675
Aplan-10C-3676-Thy_vs_Aplan-10C-3676-Tail	chr13	89705094	89705094	G	C	Vcan	c.1746C>G	p.Pro582Pro	synonymous_variant	LOW	148	0	0.007645	107	40	0.388	5.98885
Aplan-10C-3676-Thy_vs_Aplan-10C-3676-Tail	chr13	91863260	91863260	C	G	Ckmt2	c.230G>C	p.Arg77Pro	missense_variant	MODERATE	65	0	0.017	67	14	0.21	4.23646
Aplan-10C-3676-Thy_vs_Aplan-10C-3676-Tail	chr13	93464687	93464687	G	C	Jmy	c.1210C>G	p.Arg404Gly	missense_variant	MODERATE	77	0	0.016	52	20	0.357	6.03428
Aplan-10C-3676-Thy_vs_Aplan-10C-3676-Tail	chr13	95336153	95336153	C	G	Zbed3	c.84C>G	p.Pro28Pro	synonymous_variant	LOW	32	0	0.036	41	10	0.228	2.71938
Aplan-10C-3676-Thy_vs_Aplan-10C-3676-Tail	chr13	95336338	95336338	C	G	Zbed3	c.269C>G	p.Pro90Arg	missense_variant	MODERATE	17	0	0.053	21	5	0.238	1.2768
Aplan-10C-3676-Thy_vs_Aplan-10C-3676-Tail	chr13	95514007	95514007	G	C	F2rl1	c.366C>G	p.Ala122Ala	synonymous_variant	LOW	69	0	0.016	48	12	0.256	5.04142
Aplan-10C-3676-Thy_vs_Aplan-10C-3676-Tail	chr13	95604342	95604342	G	C	F2r	c.684C>G	p.Cys228Trp	missense_variant	MODERATE	77	0	0.014	63	13	0.222	4.836
Aplan-10C-3676-Thy_vs_Aplan-10C-3676-Tail	chr13	95618367	95618367	G	C	F2r	c.8C>G	p.Pro3Arg	missense_variant	MODERATE	34	0	0.03	21	12	0.556	6.17395
Aplan-10C-3676-Thy_vs_Aplan-10C-3676-Tail	chr13	95661631	95661631	G	C	Iqgap2	c.3165C>G	p.Thr1055Thr	synonymous_variant	LOW	44	0	0.026	52	15	0.282	4.44352
Aplan-10C-3676-Thy_vs_Aplan-10C-3676-Tail	chr13	95671336	95671336	G	C	Iqgap2	c.2422C>G	p.Arg808Gly	missense_variant	MODERATE	75	0	0.017	55	18	0.333	5.98768
Aplan-10C-3676-Thy_vs_Aplan-10C-3676-Tail	chr13	96414560	96414560	G	T	Poc5	c.1618G>T	p.Gly540*	stop_gained	HIGH	63	0	0.019	62	25	0.41	5.99104
Aplan-10C-3676-Thy_vs_Aplan-10C-3676-Tail	chr13	96946500	96946500	C	G	Gcnt4	c.303C>G	p.Asp101Glu	missense_variant	MODERATE	102	0	0.011	67	21	0.299	6.39894
Aplan-10C-3676-Thy_vs_Aplan-10C-3676-Tail	chr13	97994053	97994053	C	G	Arhgef28	c.1276G>C	p.Gly426Arg	missense_variant	MODERATE	38	0	0.031	27	11	0.385	4.83665
Aplan-10C-3676-Thy_vs_Aplan-10C-3676-Tail	chr13	98637278	98637278	C	G	Tmem174	c.43G>C	p.Val15Leu	missense_variant	MODERATE	49	0	0.022	41	11	0.3	4.11953
Aplan-10C-3676-Thy_vs_Aplan-10C-3676-Tail	chr13	98856885	98856885	G	C	Tnpo1	c.1788+4C>G		splice_region_variant&intron_variant	LOW	129	0	0.009321	113	48	0.405	6.22401
Aplan-10C-3676-Thy_vs_Aplan-10C-3676-Tail	chr13	99429290	99429290	G	C	Map1b	c.6922C>G	p.Arg2308Gly	missense_variant	MODERATE	64	0	0.017	56	21	0.389	6.17981
Aplan-10C-3676-Thy_vs_Aplan-10C-3676-Tail	chr13	99430855	99430855	C	T	Map1b	c.5357G>A	p.Arg1786Gln	missense_variant	MODERATE	83	0	0.014	54	19	0.364	7.02901
Aplan-10C-3676-Thy_vs_Aplan-10C-3676-Tail	chr13	100099030	100099030	G	C	Bdp1	c.412C>G	p.Pro138Ala	missense_variant	MODERATE	81	0	0.014	56	17	0.3	7.33241
Aplan-10C-3676-Thy_vs_Aplan-10C-3676-Tail	chr13	100300653	100300653	G	C	Naip6	c.1361C>G	p.Thr454Arg	missense_variant	MODERATE	205	0	0.005796	206	53	0.259	5.90379
Aplan-10C-3676-Thy_vs_Aplan-10C-3676-Tail	chr13	100611464	100611464	C	G	Marveld2	c.1106G>C	p.Arg369Pro	missense_variant	MODERATE	49	0	0.023	50	22	0.414	6.02573
Aplan-10C-3676-Thy_vs_Aplan-10C-3676-Tail	chr13	102804641	102804641	C	G	Mast4	c.906+1G>C		splice_donor_variant&intron_variant	HIGH	53	0	0.024	36	13	0.414	5.78423
Aplan-10C-3676-Thy_vs_Aplan-10C-3676-Tail	chr13	104072887	104072887	C	G	Nln	c.177G>C	p.Thr59Thr	synonymous_variant	LOW	99	0	0.012	65	24	0.362	6.5891
Aplan-10C-3676-Thy_vs_Aplan-10C-3676-Tail	chr13	105109443	105109443	G	C	4933425L06Rik	c.511G>C	p.Gly171Arg	missense_variant	MODERATE	65	0	0.018	60	24	0.396	5.85435
Aplan-10C-3676-Thy_vs_Aplan-10C-3676-Tail	chr13	110084161	110084161	G	C	Rab3c	c.465C>G	p.Thr155Thr	synonymous_variant	LOW	76	1	0.034	49	20	0.41	6.8061
Aplan-10C-3676-Thy_vs_Aplan-10C-3676-Tail	chr14	14348817	14348817	G	C	Il3ra	c.214-4G>C		splice_region_variant&intron_variant	LOW	28	0	0.042	12	3	0.3	1.65233
Aplan-10C-3676-Thy_vs_Aplan-10C-3676-Tail	chr14	20688765	20688765	C	G	Sec24c	c.1407C>G	p.Thr469Thr	synonymous_variant	LOW	142	1	0.008829	128	48	0.369	5.9646
Aplan-10C-3676-Thy_vs_Aplan-10C-3676-Tail	chr14	25646896	25646896	C	G	Zmiz1	c.1137C>G	p.Pro379Pro	synonymous_variant	LOW	28	0	0.038	19	7	0.4	3.09626
Aplan-10C-3676-Thy_vs_Aplan-10C-3676-Tail	chr14	27091978	27091978	C	G	Il17rd	c.645C>G	p.His215Gln	missense_variant	MODERATE	69	0	0.015	54	14	0.275	5.47325
Aplan-10C-3676-Thy_vs_Aplan-10C-3676-Tail	chr14	31032498	31032498	C	G	Pbrm1	c.474C>G	p.Asp158Glu	missense_variant	MODERATE	76	0	0.015	77	23	0.317	5.9412
Aplan-10C-3676-Thy_vs_Aplan-10C-3676-Tail	chr14	31148074	31148074	C	G	Stab1	c.4187G>C	p.Arg1396Pro	missense_variant	MODERATE	85	0	0.014	73	24	0.323	6.15278
Aplan-10C-3676-Thy_vs_Aplan-10C-3676-Tail	chr14	31223058	31223058	C	G	Sema3g	c.1137C>G	p.Pro379Pro	synonymous_variant	LOW	32	0	0.037	23	7	0.304	2.9179
Aplan-10C-3676-Thy_vs_Aplan-10C-3676-Tail	chr14	31263920	31263920	C	G	Dnah1	c.11315G>C	p.Arg3772Pro	missense_variant	MODERATE	43	0	0.025	25	6	0.261	2.79101
Aplan-10C-3676-Thy_vs_Aplan-10C-3676-Tail	chr14	31287855	31287855	C	G	Dnah1	c.5755G>C	p.Gly1919Arg	missense_variant	MODERATE	60	0	0.02	37	17	0.451	6.68057
Aplan-10C-3676-Thy_vs_Aplan-10C-3676-Tail	chr14	34567489	34567489	C	G	Ldb3	c.759G>C	p.Pro253Pro	synonymous_variant	LOW	42	0	0.027	37	10	0.301	3.61658
Aplan-10C-3676-Thy_vs_Aplan-10C-3676-Tail	chr14	45163001	45163001	C	G	Txndc16	c.1042G>C	p.Val348Leu	missense_variant	MODERATE	114	0	0.011	96	30	0.342	5.79583
Aplan-10C-3676-Thy_vs_Aplan-10C-3676-Tail	chr14	52008865	52008865	C	G	Zfp219	c.804G>C	p.Pro268Pro	synonymous_variant	LOW	55	0	0.024	27	5	0.227	2.52889
Aplan-10C-3676-Thy_vs_Aplan-10C-3676-Tail	chr14	54584980	54584980	C	T	4931414P19Rik	c.1199G>A	p.Arg400Gln	missense_variant&splice_region_variant	MODERATE	79	0	0.016	59	11	0.217	4.3129
Aplan-10C-3676-Thy_vs_Aplan-10C-3676-Tail	chr14	55065557	55065557	C	G	Zfhx2	c.4969G>C	p.Gly1657Arg	missense_variant	MODERATE	28	0	0.037	22	7	0.25	2.76766
Aplan-10C-3676-Thy_vs_Aplan-10C-3676-Tail	chr14	55065890	55065890	C	T	Zfhx2	c.4636G>A	p.Val1546Met	missense_variant	MODERATE	44	0	0.025	33	12	0.393	5.01524
Aplan-10C-3676-Thy_vs_Aplan-10C-3676-Tail	chr14	55095965	55095965	C	G	Thtpa	c.506C>G	p.Pro169Arg	missense_variant	MODERATE	29	0	0.036	33	11	0.333	3.34791
Aplan-10C-3676-Thy_vs_Aplan-10C-3676-Tail	chr14	55113540	55113540	C	G	Jph4	c.1018G>C	p.Gly340Arg	missense_variant	MODERATE	23	0	0.047	15	3	0.235	1.26813
Aplan-10C-3676-Thy_vs_Aplan-10C-3676-Tail	chr14	55543948	55543948	C	G	Pck2	c.630C>G	p.Tyr210*	stop_gained	HIGH	48	0	0.024	29	5	0.208	2.22109
Aplan-10C-3676-Thy_vs_Aplan-10C-3676-Tail	chr14	56959815	56959815	C	G	Zmym2	c.4039C>G	p.Arg1347Gly	missense_variant	MODERATE	163	0	0.007851	117	37	0.32	6.42554
Aplan-10C-3676-Thy_vs_Aplan-10C-3676-Tail	chr14	57035933	57035933	C	G	Gja3	c.981G>C	p.Thr327Thr	synonymous_variant	LOW	22	0	0.045	21	7	0.35	2.44268
Aplan-10C-3676-Thy_vs_Aplan-10C-3676-Tail	chr14	60692023	60692023	C	G	Spata13	c.1029C>G	p.Ser343Arg	missense_variant	MODERATE	53	0	0.021	54	17	0.326	5.46551
Aplan-10C-3676-Thy_vs_Aplan-10C-3676-Tail	chr14	60706993	60706993	C	G	Spata13	c.1834C>G	p.Arg612Gly	missense_variant	MODERATE	42	0	0.026	26	6	0.259	2.67707
Aplan-10C-3676-Thy_vs_Aplan-10C-3676-Tail	chr14	60831121	60831121	C	G	Mipep	c.1341C>G	p.His447Gln	missense_variant	MODERATE	67	0	0.018	58	12	0.224	4.29564
Aplan-10C-3676-Thy_vs_Aplan-10C-3676-Tail	chr14	67774494	67774494	C	G	Dock5	c.4130G>C	p.Arg1377Pro	missense_variant&splice_region_variant	MODERATE	39	0	0.032	26	13	0.546	6.19834
Aplan-10C-3676-Thy_vs_Aplan-10C-3676-Tail	chr14	69704046	69704046	G	C	R3hcc1	c.1116C>G	p.Pro372Pro	synonymous_variant	LOW	59	0	0.02	33	6	0.2	2.80876
Aplan-10C-3676-Thy_vs_Aplan-10C-3676-Tail	chr14	77582511	77582511	C	G	Enox1	c.705C>G	p.Arg235Arg	synonymous_variant	LOW	16	0	0.064	20	9	0.412	2.71997
Aplan-10C-3676-Thy_vs_Aplan-10C-3676-Tail	chr14	78577508	78577508	C	G	Dgkh	c.3359G>C	p.Arg1120Pro	missense_variant	MODERATE	101	0	0.012	84	29	0.352	6.7087
Aplan-10C-3676-Thy_vs_Aplan-10C-3676-Tail	chr14	99073648	99073648	C	G	Bora	c.1515C>G	p.Pro505Pro	splice_region_variant&synonymous_variant	LOW	36	0	0.034	25	9	0.363	3.92883
Aplan-10C-3676-Thy_vs_Aplan-10C-3676-Tail	chr14	100022881	100022881	C	G	Klf12	c.411G>C	p.Ser137Ser	synonymous_variant	LOW	87	0	0.014	62	17	0.304	7.11218
Aplan-10C-3676-Thy_vs_Aplan-10C-3676-Tail	chr14	101479178	101479178	C	G	Tbc1d4	c.1780G>C	p.Gly594Arg	missense_variant	MODERATE	95	0	0.013	81	24	0.286	6.09617
Aplan-10C-3676-Thy_vs_Aplan-10C-3676-Tail	chr14	121583515	121583515	C	G	Dock9	c.4463G>C	p.Arg1488Pro	missense_variant	MODERATE	41	0	0.026	36	9	0.272	3.23391
Aplan-10C-3676-Thy_vs_Aplan-10C-3676-Tail	chr14	121627875	121627875	C	G	Dock9	c.2041G>C	p.Gly681Arg	missense_variant	MODERATE	73	1	0.035	53	20	0.429	6.11707
Aplan-10C-3676-Thy_vs_Aplan-10C-3676-Tail	chr14	121634507	121634507	C	G	Dock9	c.1694G>C	p.Arg565Pro	missense_variant	MODERATE	46	0	0.027	43	12	0.325	4.18965
Aplan-10C-3676-Thy_vs_Aplan-10C-3676-Tail	chr15	4516857	4516857	C	G	Plcxd3	c.342C>G	p.His114Gln	missense_variant	MODERATE	79	0	0.014	82	27	0.331	6.02037
Aplan-10C-3676-Thy_vs_Aplan-10C-3676-Tail	chr15	6435168	6435168	C	G	Dab2	c.1499C>G	p.Thr500Arg	missense_variant	MODERATE	64	0	0.019	35	12	0.333	6.04444
Aplan-10C-3676-Thy_vs_Aplan-10C-3676-Tail	chr15	6776098	6776098	C	G	Rictor	c.1764C>G	p.Tyr588*	stop_gained	HIGH	86	0	0.015	87	27	0.343	6.00024
Aplan-10C-3676-Thy_vs_Aplan-10C-3676-Tail	chr15	6786652	6786652	C	G	Rictor	c.3404C>G	p.Thr1135Arg	missense_variant	MODERATE	74	0	0.016	55	15	0.286	6.09927
Aplan-10C-3676-Thy_vs_Aplan-10C-3676-Tail	chr15	6795990	6795990	C	G	Rictor	c.5008C>G	p.Arg1670Gly	missense_variant	MODERATE	144	0	0.008332	139	44	0.316	5.99767
Aplan-10C-3676-Thy_vs_Aplan-10C-3676-Tail	chr15	7834634	7834634	C	G	Gdnf	c.525C>G	p.Ser175Arg	missense_variant	MODERATE	63	0	0.017	81	29	0.365	6.47008
Aplan-10C-3676-Thy_vs_Aplan-10C-3676-Tail	chr15	8228776	8228776	C	G	2410089E03Rik	c.6505C>G	p.Arg2169Gly	missense_variant	MODERATE	47	0	0.023	46	16	0.372	5.58442
Aplan-10C-3676-Thy_vs_Aplan-10C-3676-Tail	chr15	8645673	8645673	C	G	Slc1a3	c.847G>C	p.Ala283Pro	missense_variant	MODERATE	50	0	0.023	44	17	0.366	6.48684
Aplan-10C-3676-Thy_vs_Aplan-10C-3676-Tail	chr15	9367434	9367434	C	G	Ugt3a2	c.1262C>G	p.Ala421Gly	missense_variant	MODERATE	78	0	0.014	74	28	0.383	5.86844
Aplan-10C-3676-Thy_vs_Aplan-10C-3676-Tail	chr15	16856005	16856005	C	G	Cdh9	c.2130C>G	p.Asp710Glu	missense_variant	MODERATE	68	0	0.015	64	13	0.214	4.38955
Aplan-10C-3676-Thy_vs_Aplan-10C-3676-Tail	chr15	20666646	20666646	C	G	Acot10	c.8G>C	p.Arg3Pro	missense_variant	MODERATE	136	0	0.008702	110	37	0.308	5.85329
Aplan-10C-3676-Thy_vs_Aplan-10C-3676-Tail	chr15	21586372	21586372	C	G	Cdh12	c.2276C>G	p.Thr759Arg	missense_variant	MODERATE	74	0	0.015	65	18	0.283	6.57114
Aplan-10C-3676-Thy_vs_Aplan-10C-3676-Tail	chr15	21586379	21586379	C	G	Cdh12	c.2283C>G	p.Ala761Ala	synonymous_variant	LOW	71	0	0.016	62	17	0.28	6.22171
Aplan-10C-3676-Thy_vs_Aplan-10C-3676-Tail	chr15	25807923	25807923	C	G	Myo10	c.5630C>G	p.Pro1877Arg	missense_variant	MODERATE	64	0	0.019	46	13	0.29	5.41589
Aplan-10C-3676-Thy_vs_Aplan-10C-3676-Tail	chr15	38679411	38679411	C	G	Atp6v1c1	c.473C>G	p.Ala158Gly	missense_variant&splice_region_variant	MODERATE	55	0	0.023	28	8	0.333	4.10348
Aplan-10C-3676-Thy_vs_Aplan-10C-3676-Tail	chr15	39031373	39031373	C	G	Fzd6	c.933C>G	p.Ala311Ala	synonymous_variant	LOW	83	0	0.014	65	25	0.397	6.01698
Aplan-10C-3676-Thy_vs_Aplan-10C-3676-Tail	chr15	39031691	39031691	C	T	Fzd6	c.1251C>T	p.Ile417Ile	synonymous_variant	LOW	113	0	0.011	103	23	0.239	6.38121
Aplan-10C-3676-Thy_vs_Aplan-10C-3676-Tail	chr15	39097641	39097641	C	G	Slc25a32	c.691G>C	p.Ala231Pro	missense_variant	MODERATE	60	1	0.02	68	27	0.387	6.09329
Aplan-10C-3676-Thy_vs_Aplan-10C-3676-Tail	chr15	41869639	41869639	C	G	Abra	c.30G>C	p.Ala10Ala	synonymous_variant	LOW	51	2	0.043	42	19	0.487	5.71614
Aplan-10C-3676-Thy_vs_Aplan-10C-3676-Tail	chr15	50664748	50664748	C	G	Trps1	c.2735G>C	p.Arg912Pro	missense_variant	MODERATE	66	0	0.019	49	18	0.359	6.0327
Aplan-10C-3676-Thy_vs_Aplan-10C-3676-Tail	chr15	55518248	55518248	C	G	Col14a1	c.5216C>G	p.Pro1739Arg	missense_variant	MODERATE	34	0	0.036	27	9	0.375	3.56821
Aplan-10C-3676-Thy_vs_Aplan-10C-3676-Tail	chr15	55620690	55620690	C	G	Mtbp	c.2534C>G	p.Thr845Arg	missense_variant	MODERATE	34	0	0.033	30	7	0.231	2.48451
Aplan-10C-3676-Thy_vs_Aplan-10C-3676-Tail	chr15	58009734	58009734	C	G	Fam83a	c.958C>G	p.Arg320Gly	missense_variant	MODERATE	39	0	0.027	30	10	0.357	4.05375
Aplan-10C-3676-Thy_vs_Aplan-10C-3676-Tail	chr15	58009768	58009768	G	C	Fam83a	c.992G>C	p.Arg331Pro	missense_variant	MODERATE	45	0	0.023	31	8	0.288	3.37844
Aplan-10C-3676-Thy_vs_Aplan-10C-3676-Tail	chr15	71973822	71973822	G	C	Col22a1	c.1090C>G	p.Arg364Gly	missense_variant	MODERATE	66	1	0.036	62	22	0.352	5.99454
Aplan-10C-3676-Thy_vs_Aplan-10C-3676-Tail	chr15	72948815	72948815	G	C	Trappc9	c.1802C>G	p.Pro601Arg	missense_variant	MODERATE	108	0	0.011	127	39	0.31	6.09526
Aplan-10C-3676-Thy_vs_Aplan-10C-3676-Tail	chr15	73050600	73050600	C	G	Trappc9	c.854G>C	p.Arg285Pro	missense_variant	MODERATE	33	0	0.037	15	5	0.331	2.75603
Aplan-10C-3676-Thy_vs_Aplan-10C-3676-Tail	chr15	74980105	74980105	G	C	Ly6i	c.214C>G	p.Arg72Gly	missense_variant	MODERATE	80	0	0.015	63	16	0.25	6.22243
Aplan-10C-3676-Thy_vs_Aplan-10C-3676-Tail	chr15	74983045	74983045	G	C	Ly6i	c.15C>G	p.His5Gln	missense_variant	MODERATE	289	0	0.004254	204	60	0.317	5.97434
Aplan-10C-3676-Thy_vs_Aplan-10C-3676-Tail	chr15	75597622	75597622	C	G	Gpihbp1	c.285C>G	p.Ser95Arg	missense_variant	MODERATE	44	0	0.023	35	8	0.242	3.04472
Aplan-10C-3676-Thy_vs_Aplan-10C-3676-Tail	chr15	75710714	75710714	C	G	Rhpn1	c.654C>G	p.Phe218Leu	missense_variant	MODERATE	32	0	0.032	26	12	0.478	4.96539
Aplan-10C-3676-Thy_vs_Aplan-10C-3676-Tail	chr15	76065262	76065262	C	T	Scrib	c.994G>A	p.Gly332Arg	missense_variant	MODERATE	26	0	0.043	28	7	0.25	1.98297
Aplan-10C-3676-Thy_vs_Aplan-10C-3676-Tail	chr15	76434117	76434117	C	G	Mroh1	c.2722C>G	p.Arg908Gly	missense_variant	MODERATE	66	0	0.019	36	12	0.377	6.03316
Aplan-10C-3676-Thy_vs_Aplan-10C-3676-Tail	chr15	76901005	76901005	C	G	Commd5	c.601C>G	p.Arg201Gly	missense_variant	MODERATE	64	1	0.034	43	11	0.262	3.81051
Aplan-10C-3676-Thy_vs_Aplan-10C-3676-Tail	chr15	77635476	77635476	C	G	Apol11b	c.403G>C	p.Gly135Arg	missense_variant	MODERATE	68	0	0.016	62	20	0.327	6.26308
Aplan-10C-3676-Thy_vs_Aplan-10C-3676-Tail	chr15	78287924	78287924	C	G	Csf2rb2	c.1285G>C	p.Glu429Gln	missense_variant	MODERATE	44	0	0.024	41	20	0.429	6.0403
Aplan-10C-3676-Thy_vs_Aplan-10C-3676-Tail	chr15	78345530	78345530	C	G	Csf2rb	c.1296C>G	p.Ser432Arg	missense_variant	MODERATE	40	0	0.03	49	18	0.4	5.27715
Aplan-10C-3676-Thy_vs_Aplan-10C-3676-Tail	chr15	78452516	78452516	G	C	Tmprss6	c.1183C>G	p.Arg395Gly	missense_variant	MODERATE	50	0	0.026	34	9	0.259	3.84625
Aplan-10C-3676-Thy_vs_Aplan-10C-3676-Tail	chr15	78525125	78525125	C	G	C1qtnf6	c.521G>C	p.Arg174Pro	missense_variant	MODERATE	42	0	0.025	48	16	0.359	4.94771
Aplan-10C-3676-Thy_vs_Aplan-10C-3676-Tail	chr15	79055539	79055539	G	C	Ankrd54	c.548C>G	p.Ala183Gly	missense_variant	MODERATE	59	2	0.042	56	20	0.355	5.11524
Aplan-10C-3676-Thy_vs_Aplan-10C-3676-Tail	chr15	79665835	79665835	C	G	Cby1	c.189C>G	p.Ser63Ser	synonymous_variant	LOW	67	0	0.016	74	19	0.258	5.82152
Aplan-10C-3676-Thy_vs_Aplan-10C-3676-Tail	chr15	81471001	81471001	G	C	Rbx1	c.207G>C	p.Thr69Thr	synonymous_variant	LOW	35	0	0.034	22	6	0.299	2.68695
Aplan-10C-3676-Thy_vs_Aplan-10C-3676-Tail	chr15	81772422	81772422	C	T	Zc3h7b	c.445-6C>T		splice_region_variant&intron_variant	LOW	47	0	0.026	39	16	0.323	6.40881
Aplan-10C-3676-Thy_vs_Aplan-10C-3676-Tail	chr15	82392033	82392033	C	G	Cyp2d11	c.436G>C	p.Gly146Arg	missense_variant	MODERATE	173	0	0.006546	138	41	0.294	6.05938
Aplan-10C-3676-Thy_vs_Aplan-10C-3676-Tail	chr15	83303178	83303178	C	G	Arfgap3	c.1482G>C	p.Ala494Ala	synonymous_variant	LOW	33	0	0.034	27	4	0.208	1.44382
Aplan-10C-3676-Thy_vs_Aplan-10C-3676-Tail	chr15	84557009	84557009	G	C	Ldoc1l	c.185C>G	p.Ala62Gly	missense_variant	MODERATE	24	0	0.045	23	10	0.435	3.65572
Aplan-10C-3676-Thy_vs_Aplan-10C-3676-Tail	chr15	85817004	85817004	C	G	Pkdrej	c.4730G>C	p.Arg1577Pro	missense_variant	MODERATE	77	0	0.015	53	12	0.25	5.03353
Aplan-10C-3676-Thy_vs_Aplan-10C-3676-Tail	chr15	85929437	85929437	G	C	Celsr1	c.5973C>G	p.Pro1991Pro	synonymous_variant	LOW	29	0	0.041	20	7	0.389	3.04458
Aplan-10C-3676-Thy_vs_Aplan-10C-3676-Tail	chr15	86032164	86032164	G	C	Celsr1	c.1607C>G	p.Pro536Arg	missense_variant	MODERATE	57	0	0.021	53	18	0.32	6.48946
Aplan-10C-3676-Thy_vs_Aplan-10C-3676-Tail	chr15	89046854	89046854	C	G	Mov10l1	c.3120C>G	p.Ala1040Ala	synonymous_variant	LOW	41	1	0.033	41	10	0.282	2.15388
Aplan-10C-3676-Thy_vs_Aplan-10C-3676-Tail	chr15	89123657	89123657	C	G	Hdac10	c.1895G>C	p.Gly632Ala	missense_variant	MODERATE	63	0	0.017	51	17	0.354	6.70182
Aplan-10C-3676-Thy_vs_Aplan-10C-3676-Tail	chr15	89127917	89127917	C	G	Hdac10	c.291+5G>C		splice_region_variant&intron_variant	LOW	77	0	0.016	61	16	0.265	6.21774
Aplan-10C-3676-Thy_vs_Aplan-10C-3676-Tail	chr15	89145855	89145855	C	G	Mapk11	c.557G>C	p.Arg186Pro	missense_variant	MODERATE	59	0	0.019	60	21	0.362	6.94377
Aplan-10C-3676-Thy_vs_Aplan-10C-3676-Tail	chr15	89146011	89146011	C	G	Mapk11	c.487G>C	p.Glu163Gln	missense_variant	MODERATE	49	0	0.022	43	21	0.405	6.51639
Aplan-10C-3676-Thy_vs_Aplan-10C-3676-Tail	chr15	89424318	89424318	C	G	Cpt1b	c.406G>C	p.Gly136Arg	missense_variant	MODERATE	48	0	0.024	35	14	0.387	6.05691
Aplan-10C-3676-Thy_vs_Aplan-10C-3676-Tail	chr15	89504331	89504331	C	G	Shank3	c.900C>G	p.Arg300Arg	synonymous_variant	LOW	17	0	0.063	19	9	0.471	2.90676
Aplan-10C-3676-Thy_vs_Aplan-10C-3676-Tail	chr15	90227676	90227677	AC	TT	Alg10b	c.722_723delACinsTT	p.Tyr241Phe	missense_variant	MODERATE	132	0	0.008633	104	38	0.384	6.30671
Aplan-10C-3676-Thy_vs_Aplan-10C-3676-Tail	chr15	92228731	92228731	G	C	Cntn1	c.203G>C	p.Arg68Pro	missense_variant	MODERATE	52	0	0.021	41	12	0.308	4.72215
Aplan-10C-3676-Thy_vs_Aplan-10C-3676-Tail	chr15	94346061	94346061	C	G	Adamts20	c.1784G>C	p.Arg595Pro	missense_variant	MODERATE	85	0	0.013	52	10	0.234	4.46217
Aplan-10C-3676-Thy_vs_Aplan-10C-3676-Tail	chr15	97977298	97977298	C	G	Col2a1	c.3958G>C	p.Gly1320Arg	missense_variant	MODERATE	38	0	0.03	46	18	0.386	5.35736
Aplan-10C-3676-Thy_vs_Aplan-10C-3676-Tail	chr15	98806079	98806079	C	G	Ddn	c.1331G>C	p.Gly444Ala	missense_variant	MODERATE	73	0	0.016	63	14	0.2	5.0557
Aplan-10C-3676-Thy_vs_Aplan-10C-3676-Tail	chr15	99521169	99521169	C	G	Faim2	c.318G>C	p.Lys106Asn	missense_variant&splice_region_variant	MODERATE	23	0	0.047	22	6	0.285	2.03808
Aplan-10C-3676-Thy_vs_Aplan-10C-3676-Tail	chr15	100175226	100175226	C	G	Dip2b	c.2208C>G	p.Asp736Glu	missense_variant	MODERATE	97	0	0.013	86	24	0.273	6.90851
Aplan-10C-3676-Thy_vs_Aplan-10C-3676-Tail	chr15	100512267	100512267	C	A	Tfcp2	c.1218G>T	p.Pro406Pro	synonymous_variant	LOW	68	0	0.019	49	9	0.207	3.60423
Aplan-10C-3676-Thy_vs_Aplan-10C-3676-Tail	chr15	100955466	100955466	C	G	Scn8a	c.333C>G	p.Ala111Ala	synonymous_variant	LOW	82	0	0.016	75	27	0.338	6.72899
Aplan-10C-3676-Thy_vs_Aplan-10C-3676-Tail	chr15	101011185	101011185	C	A	Scn8a	c.2533C>A	p.Arg845Arg	synonymous_variant	LOW	41	0	0.03	43	8	0.229	2.25822
Aplan-10C-3676-Thy_vs_Aplan-10C-3676-Tail	chr15	101016593	101016593	C	G	Scn8a	c.3479C>G	p.Thr1160Arg	missense_variant	MODERATE	40	0	0.029	35	16	0.467	6.32345
Aplan-10C-3676-Thy_vs_Aplan-10C-3676-Tail	chr15	101801913	101801913	C	G	Krt73	c.385G>C	p.Ala129Pro	missense_variant	MODERATE	84	1	0.027	71	26	0.377	6.15565
Aplan-10C-3676-Thy_vs_Aplan-10C-3676-Tail	chr15	102161089	102161089	G	C	Soat2	c.1184G>C	p.Arg395Pro	missense_variant	MODERATE	73	0	0.016	38	9	0.251	4.49133
Aplan-10C-3676-Thy_vs_Aplan-10C-3676-Tail	chr15	102180069	102180069	C	G	Csad	c.721G>C	p.Val241Leu	missense_variant	MODERATE	29	0	0.037	36	15	0.4	4.39054
Aplan-10C-3676-Thy_vs_Aplan-10C-3676-Tail	chr15	102359187	102359187	C	G	Sp7	c.237G>C	p.Pro79Pro	synonymous_variant	LOW	20	0	0.053	15	4	0.266	1.58387
Aplan-10C-3676-Thy_vs_Aplan-10C-3676-Tail	chr15	103155888	103155888	C	G	Smug1	c.605G>C	p.Arg202Pro	missense_variant	MODERATE	24	0	0.041	21	7	0.4	2.59136
Aplan-10C-3676-Thy_vs_Aplan-10C-3676-Tail	chr16	4551992	4551992	C	G	Tfap4	c.198G>C	p.Ala66Ala	synonymous_variant	LOW	40	0	0.026	27	7	0.304	2.99092
Aplan-10C-3676-Thy_vs_Aplan-10C-3676-Tail	chr16	5178626	5178626	G	C	Sec14l5	c.1435G>C	p.Val479Leu	missense_variant&splice_region_variant	MODERATE	53	0	0.022	32	11	0.31	5.21842
Aplan-10C-3676-Thy_vs_Aplan-10C-3676-Tail	chr16	8664254	8664254	C	G	Carhsp1	c.161+1G>C		splice_donor_variant&intron_variant	HIGH	28	0	0.04	13	4	0.333	2.15117
Aplan-10C-3676-Thy_vs_Aplan-10C-3676-Tail	chr16	10421088	10421088	C	T	Nubp1	c.566C>T	p.Ala189Val	missense_variant	MODERATE	40	0	0.026	36	6	0.213	2.05015
Aplan-10C-3676-Thy_vs_Aplan-10C-3676-Tail	chr16	10427378	10427378	C	G	Tvp23a	c.351+5G>C		splice_region_variant&intron_variant	LOW	152	0	0.008599	65	26	0.345	6.78318
Aplan-10C-3676-Thy_vs_Aplan-10C-3676-Tail	chr16	10428697	10428697	C	G	Tvp23a	c.223G>C	p.Val75Leu	missense_variant	MODERATE	38	0	0.033	40	11	0.314	3.34497
Aplan-10C-3676-Thy_vs_Aplan-10C-3676-Tail	chr16	14115731	14115731	G	C	Marf1	c.4792C>G	p.Arg1598Gly	missense_variant	MODERATE	119	1	0.019	104	31	0.291	6.35257
Aplan-10C-3676-Thy_vs_Aplan-10C-3676-Tail	chr16	14140306	14140306	G	C	Marf1	c.2331C>G	p.Ser777Arg	missense_variant	MODERATE	76	0	0.015	66	19	0.301	7.02297
Aplan-10C-3676-Thy_vs_Aplan-10C-3676-Tail	chr16	14202117	14202117	G	C	Myh11	c.5450C>G	p.Ala1817Gly	missense_variant	MODERATE	28	0	0.043	31	11	0.417	3.42105
Aplan-10C-3676-Thy_vs_Aplan-10C-3676-Tail	chr16	15624688	15624688	G	C	Mcm4	c.2578C>G	p.Arg860Gly	missense_variant	MODERATE	51	0	0.023	51	17	0.295	5.51161
Aplan-10C-3676-Thy_vs_Aplan-10C-3676-Tail	chr16	16887718	16887718	C	G	Top3b	c.1346C>G	p.Ser449Cys	missense_variant	MODERATE	88	0	0.013	68	24	0.35	6.43411
Aplan-10C-3676-Thy_vs_Aplan-10C-3676-Tail	chr16	16892719	16892719	C	G	Top3b	c.2412C>G	p.Asp804Glu	missense_variant	MODERATE	67	0	0.018	36	8	0.25	3.89527
Aplan-10C-3676-Thy_vs_Aplan-10C-3676-Tail	chr16	16917701	16917701	G	C	Ppm1f	c.780G>C	p.Ala260Ala	synonymous_variant	LOW	57	0	0.022	44	16	0.384	6.58406
Aplan-10C-3676-Thy_vs_Aplan-10C-3676-Tail	chr16	17077888	17077888	C	G	Ypel1	c.176C>G	p.Pro59Arg	missense_variant	MODERATE	49	0	0.029	34	5	0.2	2.01847
Aplan-10C-3676-Thy_vs_Aplan-10C-3676-Tail	chr16	17573299	17573299	C	G	Slc7a4	c.1886G>C	p.Arg629Pro	missense_variant	MODERATE	20	0	0.051	15	7	0.5	3.01911
Aplan-10C-3676-Thy_vs_Aplan-10C-3676-Tail	chr16	17652226	17652226	C	A	Med15	c.2271G>T	p.Met757Ile	missense_variant	MODERATE	13	0	0.075	18	4	0.2	0.920911
Aplan-10C-3676-Thy_vs_Aplan-10C-3676-Tail	chr16	17792464	17792464	G	C	Klhl22	c.1578G>C	p.Ser526Ser	synonymous_variant	LOW	18	0	0.059	12	3	0.286	1.2661
Aplan-10C-3676-Thy_vs_Aplan-10C-3676-Tail	chr16	18443239	18443239	C	G	Txnrd2	c.636C>G	p.Asp212Glu	missense_variant	MODERATE	73	0	0.016	57	15	0.292	5.88449
Aplan-10C-3676-Thy_vs_Aplan-10C-3676-Tail	chr16	18623204	18623204	C	G	45174	c.851G>C	p.Arg284Pro	missense_variant	MODERATE	46	0	0.024	22	6	0.318	3.16641
Aplan-10C-3676-Thy_vs_Aplan-10C-3676-Tail	chr16	20559720	20559720	C	T	Abcf3	c.1738C>T	p.Arg580*	stop_gained	HIGH	85	0	0.014	77	21	0.284	5.86605
Aplan-10C-3676-Thy_vs_Aplan-10C-3676-Tail	chr16	20738234	20738234	G	C	Chrd	c.1913G>C	p.Arg638Pro	missense_variant	MODERATE	22	0	0.05	20	4	0.294	1.36365
Aplan-10C-3676-Thy_vs_Aplan-10C-3676-Tail	chr16	21766550	21766550	G	C	Ehhadh	c.580C>G	p.Arg194Gly	missense_variant	MODERATE	51	0	0.021	36	12	0.361	5.15138
Aplan-10C-3676-Thy_vs_Aplan-10C-3676-Tail	chr16	25820595	25820595	G	C	Trp63	c.532G>C	p.Asp178His	missense_variant	MODERATE	45	0	0.027	19	7	0.368	4.09092
Aplan-10C-3676-Thy_vs_Aplan-10C-3676-Tail	chr16	29616650	29616650	C	G	Opa1	c.1860C>G	p.Leu620Leu	synonymous_variant	LOW	90	0	0.014	91	19	0.243	5.87373
Aplan-10C-3676-Thy_vs_Aplan-10C-3676-Tail	chr16	37628573	37628573	C	G	Hgd	c.1158C>G	p.Leu386Leu	synonymous_variant	LOW	17	0	0.063	20	5	0.274	1.30308
Aplan-10C-3676-Thy_vs_Aplan-10C-3676-Tail	chr16	38249364	38249364	C	G	Nr1i2	c.1177G>C	p.Val393Leu	missense_variant	MODERATE	26	0	0.042	20	7	0.421	2.83914
Aplan-10C-3676-Thy_vs_Aplan-10C-3676-Tail	chr16	43817094	43817094	C	G	Drd3	c.655C>G	p.Arg219Gly	missense_variant	MODERATE	40	0	0.028	43	13	0.316	4.03669
Aplan-10C-3676-Thy_vs_Aplan-10C-3676-Tail	chr16	43973537	43973537	C	T	Zdhhc23	c.773G>A	p.Arg258Gln	missense_variant	MODERATE	103	0	0.012	79	25	0.328	5.92686
Aplan-10C-3676-Thy_vs_Aplan-10C-3676-Tail	chr16	44216516	44216516	C	G	Usf3	c.1358C>G	p.Ala453Gly	missense_variant	MODERATE	105	0	0.011	84	36	0.419	5.84362
Aplan-10C-3676-Thy_vs_Aplan-10C-3676-Tail	chr16	46448418	46448418	G	C	Nectin3	c.1620C>G	p.Ser540Ser	synonymous_variant	LOW	107	0	0.011	109	30	0.283	6.08288
Aplan-10C-3676-Thy_vs_Aplan-10C-3676-Tail	chr16	49153529	49153529	C	G	Myh15	c.3901C>G	p.Arg1301Gly	missense_variant	MODERATE	27	0	0.045	21	9	0.4	3.75632
Aplan-10C-3676-Thy_vs_Aplan-10C-3676-Tail	chr16	60425060	60425060	G	C	Epha6	c.775C>G	p.Arg259Gly	missense_variant	MODERATE	112	1	0.019	123	39	0.327	5.918
Aplan-10C-3676-Thy_vs_Aplan-10C-3676-Tail	chr16	64855944	64855944	C	G	Cggbp1	c.372C>G	p.Pro124Pro	synonymous_variant	LOW	65	0	0.018	46	19	0.366	6.79364
Aplan-10C-3676-Thy_vs_Aplan-10C-3676-Tail	chr16	73024457	73024457	G	A	Robo1	c.4084G>A	p.Ala1362Thr	missense_variant	MODERATE	41	0	0.026	25	4	0.208	1.75568
Aplan-10C-3676-Thy_vs_Aplan-10C-3676-Tail	chr16	77071750	77071750	C	G	Usp25	c.1038C>G	p.Ile346Met	missense_variant	MODERATE	61	0	0.019	49	15	0.333	5.87288
Aplan-10C-3676-Thy_vs_Aplan-10C-3676-Tail	chr16	79001758	79001758	C	G	Tmprss15	c.2035G>C	p.Gly679Arg	missense_variant	MODERATE	48	0	0.027	49	14	0.286	4.38308
Aplan-10C-3676-Thy_vs_Aplan-10C-3676-Tail	chr16	85013627	85013627	C	G	App	c.1687G>C	p.Asp563His	missense_variant&splice_region_variant	MODERATE	63	0	0.02	45	16	0.378	6.89606
Aplan-10C-3676-Thy_vs_Aplan-10C-3676-Tail	chr16	87947794	87947794	G	C	Grik1	c.1524C>G	p.His508Gln	missense_variant&splice_region_variant	MODERATE	36	0	0.028	55	18	0.326	4.19505
Aplan-10C-3676-Thy_vs_Aplan-10C-3676-Tail	chr16	90946806	90946806	C	G	Synj1	c.3685G>C	p.Gly1229Arg	missense_variant	MODERATE	82	0	0.013	62	20	0.339	6.62362
Aplan-10C-3676-Thy_vs_Aplan-10C-3676-Tail	chr16	91660405	91660405	C	G	Son	c.6039C>G	p.Pro2013Pro	synonymous_variant	LOW	21	0	0.049	23	6	0.303	1.65782
Aplan-10C-3676-Thy_vs_Aplan-10C-3676-Tail	chr16	91837120	91837120	G	C	Itsn1	c.1881G>C	p.Ala627Ala	synonymous_variant	LOW	39	0	0.027	55	19	0.375	5.00056
Aplan-10C-3676-Thy_vs_Aplan-10C-3676-Tail	chr16	91909274	91909274	C	T	Itsn1	c.4892C>T	p.Thr1631Met	missense_variant	MODERATE	37	0	0.028	30	9	0.32	3.47546
Aplan-10C-3676-Thy_vs_Aplan-10C-3676-Tail	chr16	94502179	94502179	G	C	Dscr3	c.561C>G	p.Cys187Trp	missense_variant	MODERATE	58	0	0.02	39	8	0.228	3.37089
Aplan-10C-3676-Thy_vs_Aplan-10C-3676-Tail	chr16	96152979	96152979	C	G	Wrb	c.277C>G	p.Arg93Gly	missense_variant	MODERATE	170	0	0.007439	119	42	0.377	6.04832
Aplan-10C-3676-Thy_vs_Aplan-10C-3676-Tail	chr16	97500921	97500921	G	C	Fam3b	c.102C>G	p.Asp34Glu	missense_variant	MODERATE	26	0	0.04	24	4	0.211	1.33592
Aplan-10C-3676-Thy_vs_Aplan-10C-3676-Tail	chr17	14990752	14990752	C	G	9030025P20Rik	c.1265C>G	p.Ala422Gly	missense_variant	MODERATE	74	0	0.015	67	13	0.229	4.49354
Aplan-10C-3676-Thy_vs_Aplan-10C-3676-Tail	chr17	20776647	20776647	C	G	Vmn1r228	c.608G>C	p.Arg203Pro	missense_variant	MODERATE	153	0	0.007298	123	39	0.311	5.91847
Aplan-10C-3676-Thy_vs_Aplan-10C-3676-Tail	chr17	23640194	23640194	G	C	Mmp25	c.478C>G	p.Arg160Gly	missense_variant	MODERATE	60	1	0.02	41	12	0.333	4.22018
Aplan-10C-3676-Thy_vs_Aplan-10C-3676-Tail	chr17	24594888	24594888	C	G	Pkd1	c.12325C>G	p.Arg4109Gly	missense_variant	MODERATE	50	0	0.023	33	12	0.322	5.4361
Aplan-10C-3676-Thy_vs_Aplan-10C-3676-Tail	chr17	25299226	25299226	C	G	Prss34	c.379C>G	p.Arg127Gly	missense_variant	MODERATE	55	0	0.019	63	18	0.321	5.45771
Aplan-10C-3676-Thy_vs_Aplan-10C-3676-Tail	chr17	25829820	25829820	C	G	Jmjd8	c.379C>G	p.Leu127Val	missense_variant	MODERATE	70	0	0.015	57	25	0.423	5.69174
Aplan-10C-3676-Thy_vs_Aplan-10C-3676-Tail	chr17	32883535	32883535	G	C	Zfp870	c.822C>G	p.Gly274Gly	synonymous_variant	LOW	126	0	0.009031	112	23	0.21	6.38043
Aplan-10C-3676-Thy_vs_Aplan-10C-3676-Tail	chr17	34049834	34049834	C	G	Col11a2	c.1157C>G	p.Ala386Gly	missense_variant&splice_region_variant	MODERATE	95	0	0.012	71	19	0.29	6.14928
Aplan-10C-3676-Thy_vs_Aplan-10C-3676-Tail	chr17	34148823	34148823	C	G	H2-DMb2	c.610C>G	p.Arg204Gly	missense_variant	MODERATE	75	0	0.016	72	29	0.383	6.22364
Aplan-10C-3676-Thy_vs_Aplan-10C-3676-Tail	chr17	34824665	34824665	G	C	Stk19	c.572-4C>G		splice_region_variant&intron_variant	LOW	55	0	0.019	50	17	0.333	6.22129
Aplan-10C-3676-Thy_vs_Aplan-10C-3676-Tail	chr17	35058412	35058412	G	C	Clic1	c.647G>C	p.Arg216Pro	missense_variant	MODERATE	71	0	0.018	38	12	0.322	6.06348
Aplan-10C-3676-Thy_vs_Aplan-10C-3676-Tail	chr17	35064442	35064442	G	C	G6b	c.625-6C>G		splice_region_variant&intron_variant	LOW	32	0	0.034	20	4	0.277	1.74723
Aplan-10C-3676-Thy_vs_Aplan-10C-3676-Tail	chr17	35069464	35069464	G	C	Ly6g6c	c.311G>C	p.Arg104Pro	missense_variant	MODERATE	50	0	0.025	38	11	0.279	4.42485
Aplan-10C-3676-Thy_vs_Aplan-10C-3676-Tail	chr17	35159278	35159278	G	C	Prrc2a	c.1420C>G	p.Arg474Gly	missense_variant	MODERATE	57	0	0.021	44	17	0.375	7.06632
Aplan-10C-3676-Thy_vs_Aplan-10C-3676-Tail	chr17	35195977	35195977	C	G	Ltb	c.752C>G	p.Thr251Arg	missense_variant	MODERATE	33	0	0.033	28	6	0.214	2.16845
Aplan-10C-3676-Thy_vs_Aplan-10C-3676-Tail	chr17	45514520	45514520	G	C	Aars2	c.908G>C	p.Arg303Pro	missense_variant	MODERATE	49	0	0.024	26	6	0.217	2.94181
Aplan-10C-3676-Thy_vs_Aplan-10C-3676-Tail	chr17	45516455	45516455	C	G	Aars2	c.1422C>G	p.His474Gln	missense_variant&splice_region_variant	MODERATE	38	0	0.028	21	5	0.3	2.39098
Aplan-10C-3676-Thy_vs_Aplan-10C-3676-Tail	chr17	46467177	46467177	C	G	Ttbk1	c.1938G>C	p.Ser646Ser	synonymous_variant	LOW	34	0	0.033	18	6	0.293	3.04007
Aplan-10C-3676-Thy_vs_Aplan-10C-3676-Tail	chr17	46543279	46543279	C	G	Cul9	c.496G>C	p.Gly166Arg	missense_variant	MODERATE	21	0	0.049	11	6	0.545	3.29258
Aplan-10C-3676-Thy_vs_Aplan-10C-3676-Tail	chr17	46729030	46729030	C	G	Gnmt	c.122G>C	p.Arg41Pro	missense_variant	MODERATE	21	0	0.053	17	5	0.353	1.9091
Aplan-10C-3676-Thy_vs_Aplan-10C-3676-Tail	chr17	46806562	46806562	G	C	Gltscr1l	c.2433C>G	p.Leu811Leu	synonymous_variant	LOW	62	0	0.02	34	17	0.536	7.35071
Aplan-10C-3676-Thy_vs_Aplan-10C-3676-Tail	chr17	47353878	47353878	C	G	Trerf1	c.3290C>G	p.Pro1097Arg	missense_variant	MODERATE	33	0	0.036	33	17	0.517	6.03267
Aplan-10C-3676-Thy_vs_Aplan-10C-3676-Tail	chr17	47490273	47490273	C	G	Taf8	c.784G>C	p.Gly262Arg	missense_variant	MODERATE	30	0	0.034	17	4	0.267	1.87473
Aplan-10C-3676-Thy_vs_Aplan-10C-3676-Tail	chr17	56172183	56172183	G	C	Tnfaip8l1	c.472G>C	p.Ala158Pro	missense_variant	MODERATE	32	0	0.037	15	5	0.357	2.70825
Aplan-10C-3676-Thy_vs_Aplan-10C-3676-Tail	chr17	57023512	57023512	G	C	Khsrp	c.1683C>G	p.His561Gln	missense_variant	MODERATE	54	0	0.023	46	12	0.289	4.4313
Aplan-10C-3676-Thy_vs_Aplan-10C-3676-Tail	chr17	67042096	67042096	G	C	Ptprm	c.1131C>G	p.Ala377Ala	splice_region_variant&synonymous_variant	LOW	36	0	0.032	23	6	0.302	2.64967
Aplan-10C-3676-Thy_vs_Aplan-10C-3676-Tail	chr17	73916962	73916962	C	G	Xdh	c.1434G>C	p.Lys478Asn	missense_variant&splice_region_variant	MODERATE	22	0	0.05	19	3	0.2	1.04143
Aplan-10C-3676-Thy_vs_Aplan-10C-3676-Tail	chr17	75296322	75296322	G	C	Ltbp1	c.3067G>C	p.Gly1023Arg	missense_variant	MODERATE	55	0	0.025	55	16	0.311	5.06942
Aplan-10C-3676-Thy_vs_Aplan-10C-3676-Tail	chr17	81001024	81001024	C	G	Tmem178	c.847C>G	p.Arg283Gly	missense_variant	MODERATE	51	0	0.022	44	8	0.225	2.83621
Aplan-10C-3676-Thy_vs_Aplan-10C-3676-Tail	chr17	81408239	81408239	G	C	Slc8a1	c.2364C>G	p.Phe788Leu	missense_variant	MODERATE	50	0	0.023	39	14	0.378	5.70414
Aplan-10C-3676-Thy_vs_Aplan-10C-3676-Tail	chr17	88636829	88636829	C	G	Ston1	c.1662C>G	p.Ala554Ala	synonymous_variant	LOW	45	0	0.021	46	12	0.25	3.6686
Aplan-10C-3676-Thy_vs_Aplan-10C-3676-Tail	chr18	11084428	11084428	C	G	Gata6	c.1716C>G	p.Ala572Ala	synonymous_variant	LOW	45	0	0.028	34	12	0.379	4.97029
Aplan-10C-3676-Thy_vs_Aplan-10C-3676-Tail	chr18	12984283	12984283	G	C	Impact	c.412G>C	p.Glu138Gln	missense_variant	MODERATE	81	0	0.016	88	18	0.27	5.42944
Aplan-10C-3676-Thy_vs_Aplan-10C-3676-Tail	chr18	13021852	13021852	G	C	Hrh4	c.447G>C	p.Pro149Pro	synonymous_variant	LOW	124	0	0.009805	113	42	0.376	6.01155
Aplan-10C-3676-Thy_vs_Aplan-10C-3676-Tail	chr18	13845652	13845652	G	A	Zfp521	c.1703C>T	p.Ser568Leu	missense_variant	MODERATE	87	0	0.013	73	15	0.226	5.48863
Aplan-10C-3676-Thy_vs_Aplan-10C-3676-Tail	chr18	13846201	13846201	C	G	Zfp521	c.1154G>C	p.Arg385Pro	missense_variant	MODERATE	50	0	0.02	33	15	0.414	7.0693
Aplan-10C-3676-Thy_vs_Aplan-10C-3676-Tail	chr18	15007838	15007838	G	C	Kctd1	c.1834C>G	p.Arg612Gly	missense_variant	MODERATE	73	1	0.032	62	22	0.364	5.96876
Aplan-10C-3676-Thy_vs_Aplan-10C-3676-Tail	chr18	20977780	20977780	G	C	Rnf125	c.94G>C	p.Asp32His	missense_variant	MODERATE	120	0	0.01	102	33	0.317	6.0414
Aplan-10C-3676-Thy_vs_Aplan-10C-3676-Tail	chr18	25491104	25491104	G	C	Celf4	c.1364C>G	p.Ala455Gly	missense_variant	MODERATE	65	0	0.019	48	17	0.378	7.17328
Aplan-10C-3676-Thy_vs_Aplan-10C-3676-Tail	chr18	31440494	31440494	C	G	Syt4	c.971-4G>C		splice_region_variant&intron_variant	LOW	58	0	0.019	81	26	0.308	5.97655
Aplan-10C-3676-Thy_vs_Aplan-10C-3676-Tail	chr18	36940659	36940659	G	C	Pcdha2	c.1342G>C	p.Val448Leu	missense_variant	MODERATE	239	0	0.00479	122	32	0.257	5.8001
Aplan-10C-3676-Thy_vs_Aplan-10C-3676-Tail	chr18	36947659	36947659	G	C	Pcdha3	c.1453G>C	p.Ala485Pro	missense_variant	MODERATE	211	0	0.005659	164	57	0.341	6.01805
Aplan-10C-3676-Thy_vs_Aplan-10C-3676-Tail	chr18	36947936	36947936	G	C	Pcdha3	c.1730G>C	p.Arg577Pro	missense_variant	MODERATE	141	0	0.007902	101	29	0.298	6.60358
Aplan-10C-3676-Thy_vs_Aplan-10C-3676-Tail	chr18	37722436	37722436	G	C	Pcdhgb4	c.1883G>C	p.Arg628Pro	missense_variant	MODERATE	79	0	0.013	61	19	0.311	6.10793
Aplan-10C-3676-Thy_vs_Aplan-10C-3676-Tail	chr18	37732375	37732375	C	G	Pcdhgb5	c.1222C>G	p.Arg408Gly	missense_variant	MODERATE	104	1	0.01	94	33	0.357	6.02276
Aplan-10C-3676-Thy_vs_Aplan-10C-3676-Tail	chr18	37768109	37768109	G	C	Pcdhga12	c.1993G>C	p.Ala665Pro	missense_variant	MODERATE	80	0	0.015	61	19	0.314	6.16547
Aplan-10C-3676-Thy_vs_Aplan-10C-3676-Tail	chr18	37997003	37997003	G	C	Arap3	c.104C>G	p.Ala35Gly	missense_variant	MODERATE	40	0	0.027	29	9	0.32	3.75272
Aplan-10C-3676-Thy_vs_Aplan-10C-3676-Tail	chr18	38330606	38330606	C	T	Gnpda1	c.649G>A	p.Glu217Lys	missense_variant	MODERATE	52	0	0.023	36	20	0.533	6.39123
Aplan-10C-3676-Thy_vs_Aplan-10C-3676-Tail	chr18	39111843	39111843	G	C	Arhgap26	c.540G>C	p.Glu180Asp	missense_variant	MODERATE	83	0	0.015	86	24	0.284	6.17832
Aplan-10C-3676-Thy_vs_Aplan-10C-3676-Tail	chr18	42229813	42229813	G	C	Lars	c.1639C>G	p.Gln547Glu	missense_variant	MODERATE	186	0	0.006341	142	40	0.28	6.16284
Aplan-10C-3676-Thy_vs_Aplan-10C-3676-Tail	chr18	56537248	56537248	C	G	Aldh7a1	c.964G>C	p.Ala322Pro	missense_variant	MODERATE	101	0	0.013	70	15	0.219	6.24567
Aplan-10C-3676-Thy_vs_Aplan-10C-3676-Tail	chr18	56957847	56957847	G	C	C330018D20Rik	c.243C>G	p.Pro81Pro	synonymous_variant	LOW	117	0	0.011	72	26	0.358	6.64273
Aplan-10C-3676-Thy_vs_Aplan-10C-3676-Tail	chr18	58012337	58012337	C	G	Fbn2	c.8226G>C	p.Ala2742Ala	synonymous_variant	LOW	61	0	0.019	32	6	0.213	2.92487
Aplan-10C-3676-Thy_vs_Aplan-10C-3676-Tail	chr18	58115615	58115615	G	C	Fbn2	c.1194C>G	p.Ile398Met	missense_variant	MODERATE	18	0	0.071	23	10	0.381	2.68677
Aplan-10C-3676-Thy_vs_Aplan-10C-3676-Tail	chr18	60833486	60833486	C	G	Tcof1	c.1032G>C	p.Ser344Ser	synonymous_variant	LOW	40	0	0.029	21	6	0.315	3.00998
Aplan-10C-3676-Thy_vs_Aplan-10C-3676-Tail	chr18	60916766	60916766	G	C	Arsi	c.720G>C	p.Thr240Thr	synonymous_variant	LOW	55	0	0.023	36	13	0.378	5.91893
Aplan-10C-3676-Thy_vs_Aplan-10C-3676-Tail	chr18	61220801	61220801	G	C	Pde6a	c.197G>C	p.Arg66Pro	missense_variant	MODERATE	24	0	0.043	27	7	0.269	1.97225
Aplan-10C-3676-Thy_vs_Aplan-10C-3676-Tail	chr18	61818982	61818982	C	G	Ablim3	c.1300+7G>C		splice_region_variant&intron_variant	LOW	54	0	0.024	26	8	0.348	4.26845
Aplan-10C-3676-Thy_vs_Aplan-10C-3676-Tail	chr18	67392990	67392990	G	C	Tubb6	c.211G>C	p.Gly71Arg	missense_variant	MODERATE	61	0	0.019	31	11	0.335	5.80266
Aplan-10C-3676-Thy_vs_Aplan-10C-3676-Tail	chr18	67401754	67401754	G	C	Tubb6	c.722G>C	p.Arg241Pro	missense_variant	MODERATE	73	1	0.031	44	13	0.315	5.07102
Aplan-10C-3676-Thy_vs_Aplan-10C-3676-Tail	chr18	75435301	75435301	G	C	Ctif	c.1765C>G	p.Arg589Gly	missense_variant	MODERATE	34	0	0.034	40	12	0.29	3.55349
Aplan-10C-3676-Thy_vs_Aplan-10C-3676-Tail	chr18	80256925	80256925	G	C	Pqlc1	c.10G>C	p.Glu4Gln	missense_variant	MODERATE	32	0	0.031	20	7	0.381	3.23699
Aplan-10C-3676-Thy_vs_Aplan-10C-3676-Tail	chr18	80971926	80971926	C	G	Sall3	c.2786G>C	p.Arg929Pro	missense_variant	MODERATE	40	0	0.025	50	14	0.318	3.76222
Aplan-10C-3676-Thy_vs_Aplan-10C-3676-Tail	chr18	80972485	80972485	G	C	Sall3	c.2227C>G	p.Arg743Gly	missense_variant	MODERATE	70	0	0.018	45	13	0.313	5.82557
Aplan-10C-3676-Thy_vs_Aplan-10C-3676-Tail	chr18	80974227	80974227	G	C	Sall3	c.485C>G	p.Ala162Gly	missense_variant	MODERATE	22	0	0.043	17	10	0.5	4.51441
Aplan-10C-3676-Thy_vs_Aplan-10C-3676-Tail	chr18	84209099	84209099	G	C	Zfp407	c.6384C>G	p.Ala2128Ala	synonymous_variant	LOW	85	0	0.014	66	17	0.266	6.68461
Aplan-10C-3676-Thy_vs_Aplan-10C-3676-Tail	chr19	3262045	3262045	C	A	Ighmbp2	c.2708G>T	p.Ser903Ile	missense_variant	MODERATE	13	0	0.091	18	3	0.2	0.610548
Aplan-10C-3676-Thy_vs_Aplan-10C-3676-Tail	chr19	3402544	3402544	C	G	Mtl5	c.889C>G	p.Arg297Gly	missense_variant	MODERATE	47	0	0.027	29	9	0.296	4.15306
Aplan-10C-3676-Thy_vs_Aplan-10C-3676-Tail	chr19	3987107	3987107	G	C	Acy3	c.38G>C	p.Arg13Pro	missense_variant	MODERATE	46	0	0.026	34	16	0.484	7.08749
Aplan-10C-3676-Thy_vs_Aplan-10C-3676-Tail	chr19	3988427	3988427	G	C	Acy3	c.553G>C	p.Val185Leu	missense_variant	MODERATE	64	0	0.017	37	16	0.455	6.41702
Aplan-10C-3676-Thy_vs_Aplan-10C-3676-Tail	chr19	3997881	3997881	G	C	Tbx10	c.626G>C	p.Arg209Pro	missense_variant	MODERATE	57	0	0.02	50	10	0.251	3.5341
Aplan-10C-3676-Thy_vs_Aplan-10C-3676-Tail	chr19	4006573	4006573	C	G	Doc2g	c.958C>G	p.Arg320Gly	missense_variant	MODERATE	124	0	0.008927	77	25	0.36	6.10188
Aplan-10C-3676-Thy_vs_Aplan-10C-3676-Tail	chr19	4131256	4131256	C	G	Tmem134	c.479C>G	p.Pro160Arg	missense_variant	MODERATE	75	0	0.013	61	16	0.262	6.11028
Aplan-10C-3676-Thy_vs_Aplan-10C-3676-Tail	chr19	4153383	4153383	C	G	Coro1b	c.1222C>G	p.Arg408Gly	missense_variant	MODERATE	42	0	0.027	23	5	0.217	2.39
Aplan-10C-3676-Thy_vs_Aplan-10C-3676-Tail	chr19	4271472	4271472	G	C	Ankrd13d	c.1201C>G	p.Arg401Gly	missense_variant	MODERATE	65	0	0.019	46	9	0.245	3.66148
Aplan-10C-3676-Thy_vs_Aplan-10C-3676-Tail	chr19	4273545	4273545	G	C	Ankrd13d	c.789C>G	p.Tyr263*	stop_gained	HIGH	100	2	0.028	74	27	0.426	6.23052
Aplan-10C-3676-Thy_vs_Aplan-10C-3676-Tail	chr19	4320931	4320931	G	C	Kdm2a	c.3055C>G	p.Arg1019Gly	missense_variant	MODERATE	31	0	0.035	30	10	0.346	3.47732
Aplan-10C-3676-Thy_vs_Aplan-10C-3676-Tail	chr19	4747955	4747955	C	T	Sptbn2	c.5809C>T	p.Arg1937Trp	missense_variant&splice_region_variant	MODERATE	70	0	0.017	52	15	0.268	6.13795
Aplan-10C-3676-Thy_vs_Aplan-10C-3676-Tail	chr19	4841765	4841765	C	G	Ccdc87	c.2284C>G	p.Arg762Gly	missense_variant	MODERATE	87	0	0.013	52	20	0.375	6.62948
Aplan-10C-3676-Thy_vs_Aplan-10C-3676-Tail	chr19	5696163	5696163	C	G	Map3k11	c.1405C>G	p.Arg469Gly	missense_variant	MODERATE	19	0	0.053	20	4	0.212	0.974575
Aplan-10C-3676-Thy_vs_Aplan-10C-3676-Tail	chr19	5730525	5730525	G	C	Sssca1	c.444C>G	p.Asp148Glu	missense_variant	MODERATE	36	0	0.032	13	5	0.462	3.17075
Aplan-10C-3676-Thy_vs_Aplan-10C-3676-Tail	chr19	5985903	5985903	C	T	Slc22a20	c.238G>A	p.Glu80Lys	missense_variant	MODERATE	21	0	0.051	21	6	0.285	1.68427
Aplan-10C-3676-Thy_vs_Aplan-10C-3676-Tail	chr19	6257490	6257490	C	G	Atg2a	c.4453C>G	p.Leu1485Val	missense_variant	MODERATE	27	0	0.037	29	10	0.348	3.09721
Aplan-10C-3676-Thy_vs_Aplan-10C-3676-Tail	chr19	6322587	6322587	C	G	Cdc42bpg	c.4419C>G	p.Ser1473Arg	missense_variant	MODERATE	33	1	0.06	27	9	0.375	2.46967
Aplan-10C-3676-Thy_vs_Aplan-10C-3676-Tail	chr19	6322600	6322600	C	G	Cdc42bpg	c.4432C>G	p.Arg1478Gly	missense_variant	MODERATE	35	1	0.055	26	10	0.429	3.33429
Aplan-10C-3676-Thy_vs_Aplan-10C-3676-Tail	chr19	6989521	6989521	C	G	Dnajc4	c.438G>C	p.Pro146Pro	synonymous_variant	LOW	31	0	0.035	29	13	0.461	4.88159
Aplan-10C-3676-Thy_vs_Aplan-10C-3676-Tail	chr19	6989769	6989769	G	C	Dnajc4	c.286C>G	p.Arg96Gly	missense_variant	MODERATE	72	0	0.017	44	11	0.27	5.0107
Aplan-10C-3676-Thy_vs_Aplan-10C-3676-Tail	chr19	8735846	8735846	C	G	Wdr74	c.5C>G	p.Ala2Gly	missense_variant	MODERATE	58	0	0.02	45	16	0.377	6.54067
Aplan-10C-3676-Thy_vs_Aplan-10C-3676-Tail	chr19	8955470	8955470	C	G	Tut1	c.166C>G	p.Arg56Gly	missense_variant	MODERATE	51	0	0.024	49	15	0.351	5.20626
Aplan-10C-3676-Thy_vs_Aplan-10C-3676-Tail	chr19	10056068	10056068	G	C	Fads3	c.1073G>C	p.Arg358Pro	missense_variant	MODERATE	52	0	0.02	48	13	0.302	4.56651
Aplan-10C-3676-Thy_vs_Aplan-10C-3676-Tail	chr19	10225496	10225496	G	C	Myrf	c.413C>G	p.Ser138Trp	missense_variant	MODERATE	22	0	0.05	17	9	0.465	3.94038
Aplan-10C-3676-Thy_vs_Aplan-10C-3676-Tail	chr19	10848532	10848532	C	G	Slc15a3	c.586C>G	p.Arg196Gly	missense_variant	MODERATE	38	0	0.03	36	13	0.363	4.65601
Aplan-10C-3676-Thy_vs_Aplan-10C-3676-Tail	chr19	10859084	10859084	C	G	Tmem132a	c.2081G>C	p.Arg694Pro	missense_variant	MODERATE	32	0	0.035	16	7	0.4	3.80862
Aplan-10C-3676-Thy_vs_Aplan-10C-3676-Tail	chr19	21848035	21848035	C	T	Tmem2	c.3696C>T	p.Ser1232Ser	splice_region_variant&synonymous_variant	LOW	79	0	0.015	51	24	0.444	6.97879
Aplan-10C-3676-Thy_vs_Aplan-10C-3676-Tail	chr19	31083767	31083767	G	C	Cstf2t	c.702G>C	p.Pro234Pro	synonymous_variant	LOW	57	0	0.018	40	17	0.42	6.01253
Aplan-10C-3676-Thy_vs_Aplan-10C-3676-Tail	chr19	32514017	32514017	C	G	Minpp1	c.1094C>G	p.Ala365Gly	missense_variant	MODERATE	81	0	0.014	85	43	0.465	6.06569
Aplan-10C-3676-Thy_vs_Aplan-10C-3676-Tail	chr19	32637132	32637132	C	G	Papss2	c.247C>G	p.Arg83Gly	missense_variant	MODERATE	58	2	0.024	48	10	0.207	2.22584
Aplan-10C-3676-Thy_vs_Aplan-10C-3676-Tail	chr19	37003614	37003614	G	C	Btaf1	c.4834G>C	p.Ala1612Pro	missense_variant	MODERATE	114	0	0.011	103	29	0.284	5.93567
Aplan-10C-3676-Thy_vs_Aplan-10C-3676-Tail	chr19	37044672	37044672	G	C	Cpeb3	c.1773C>G	p.Tyr591*	stop_gained	HIGH	90	0	0.013	66	24	0.333	5.83834
Aplan-10C-3676-Thy_vs_Aplan-10C-3676-Tail	chr19	38097344	38097344	C	G	Ffar4	c.218C>G	p.Ala73Gly	missense_variant	MODERATE	20	0	0.056	20	13	0.625	4.88994
Aplan-10C-3676-Thy_vs_Aplan-10C-3676-Tail	chr19	38118424	38118424	C	G	Rbp4	c.548G>C	p.Arg183Pro	missense_variant	MODERATE	23	0	0.04	27	10	0.391	3.03029
Aplan-10C-3676-Thy_vs_Aplan-10C-3676-Tail	chr19	38265635	38265635	G	C	Lgi1	c.276G>C	p.Ser92Ser	synonymous_variant	LOW	70	0	0.018	55	25	0.462	6.19847
Aplan-10C-3676-Thy_vs_Aplan-10C-3676-Tail	chr19	41559195	41559195	C	G	Lcor	c.1217C>G	p.Ser406Trp	missense_variant	MODERATE	45	0	0.027	46	16	0.307	5.2014
Aplan-10C-3676-Thy_vs_Aplan-10C-3676-Tail	chr19	41928026	41928026	G	C	Exosc1	c.310C>G	p.Arg104Gly	missense_variant&splice_region_variant	MODERATE	82	0	0.014	66	18	0.277	6.95496
Aplan-10C-3676-Thy_vs_Aplan-10C-3676-Tail	chr19	42755761	42755761	G	C	Hps1	c.1988C>G	p.Ser663Trp	missense_variant	MODERATE	19	0	0.053	13	2	0.214	0.803387
Aplan-10C-3676-Thy_vs_Aplan-10C-3676-Tail	chr19	43767275	43767275	C	G	Cutc	c.673C>G	p.Arg225Gly	missense_variant	MODERATE	48	0	0.026	41	11	0.243	4.06291
Aplan-10C-3676-Thy_vs_Aplan-10C-3676-Tail	chr19	43837525	43837525	G	C	Abcc2	c.4600G>C	p.Gly1534Arg	missense_variant	MODERATE	56	0	0.021	50	13	0.274	4.6517
Aplan-10C-3676-Thy_vs_Aplan-10C-3676-Tail	chr19	43850019	43850019	G	C	Dnmbp	c.4314C>G	p.Ser1438Ser	synonymous_variant	LOW	28	0	0.036	37	15	0.441	4.27989
Aplan-10C-3676-Thy_vs_Aplan-10C-3676-Tail	chr19	43868820	43868820	G	C	Dnmbp	c.2914C>G	p.Arg972Gly	missense_variant	MODERATE	71	0	0.018	55	27	0.5	5.89648
Aplan-10C-3676-Thy_vs_Aplan-10C-3676-Tail	chr19	43870305	43870305	G	C	Dnmbp	c.2586C>G	p.Pro862Pro	synonymous_variant	LOW	78	0	0.015	59	11	0.224	4.27683
Aplan-10C-3676-Thy_vs_Aplan-10C-3676-Tail	chr19	44401867	44401867	C	G	Scd1	c.461G>C	p.Arg154Pro	missense_variant	MODERATE	126	0	0.009316	102	29	0.276	6.50837
Aplan-10C-3676-Thy_vs_Aplan-10C-3676-Tail	chr19	45050304	45050304	G	C	Sfxn3	c.409G>C	p.Gly137Arg	missense_variant	MODERATE	56	0	0.02	40	13	0.294	5.5256
Aplan-10C-3676-Thy_vs_Aplan-10C-3676-Tail	chr19	46368035	46368035	G	C	Mfsd13a	c.578G>C	p.Arg193Pro	missense_variant	MODERATE	69	0	0.017	60	13	0.26	4.65864
Aplan-10C-3676-Thy_vs_Aplan-10C-3676-Tail	chr19	46374493	46374493	C	G	Mfsd13a	c.1339C>G	p.Arg447Gly	missense_variant	MODERATE	31	0	0.036	15	4	0.333	2.07755
Aplan-10C-3676-Thy_vs_Aplan-10C-3676-Tail	chr19	46374533	46374533	C	G	Mfsd13a	c.1379C>G	p.Ala460Gly	missense_variant	MODERATE	27	0	0.039	14	3	0.308	1.46666
Aplan-10C-3676-Thy_vs_Aplan-10C-3676-Tail	chr19	53231330	53231330	C	T	Add3	c.485C>T	p.Ser162Leu	missense_variant&splice_region_variant	MODERATE	44	0	0.026	38	15	0.397	5.80905
Aplan-10C-3676-Thy_vs_Aplan-10C-3676-Tail	chr19	56306783	56306783	C	G	Habp2	c.105C>G	p.Pro35Pro	synonymous_variant	LOW	66	0	0.019	46	15	0.297	6.48677
Aplan-10C-3676-Thy_vs_Aplan-10C-3676-Tail	chr19	56314212	56314212	C	A	Habp2	c.1058C>A	p.Thr353Asn	missense_variant	MODERATE	31	0	0.035	25	10	0.417	4.03715
Aplan-10C-3676-Thy_vs_Aplan-10C-3676-Tail	chr19	56897882	56897882	G	C	Vwa2	c.380G>C	p.Arg127Pro	missense_variant	MODERATE	14	0	0.067	10	4	0.417	1.70415
Aplan-10C-3676-Thy_vs_Aplan-10C-3676-Tail	chr19	57152359	57152359	C	T	Ablim1	c.587G>A	p.Arg196Gln	missense_variant	MODERATE	43	0	0.029	43	15	0.333	4.8566
Aplan-10C-3676-Thy_vs_Aplan-10C-3676-Tail	chr19	58673839	58673839	G	C	Pnlip	c.416G>C	p.Arg139Pro	missense_variant	MODERATE	42	0	0.025	39	13	0.342	4.66479
Aplan-10C-3676-Thy_vs_Aplan-10C-3676-Tail	chr19	61225579	61225579	C	G	Csf2ra	c.902G>C	p.Arg301Pro	missense_variant	MODERATE	19	0	0.05	14	3	0.286	1.17577
Aplan-10C-3676-Thy_vs_Aplan-10C-3676-Tail	chrX	4952677	4952677	C	T	Gm3763	c.458C>T	p.Thr153Met	missense_variant	MODERATE	254	0	0.005135	166	61	0.37	6.1094
Aplan-10C-3676-Thy_vs_Aplan-10C-3676-Tail	chrX	8062957	8062957	G	A	Suv39h1	c.1135C>T	p.Arg379*	stop_gained	HIGH	12	0	0.081	17	3	0.214	0.608526
Aplan-10C-3676-Thy_vs_Aplan-10C-3676-Tail	chrX	8458193	8458193	G	C	Ssxb2	c.314C>G	p.Pro105Arg	missense_variant	MODERATE	390	0	0.003127	330	134	0.403	5.66505
Aplan-10C-3676-Thy_vs_Aplan-10C-3676-Tail	chrX	20694308	20694308	G	A	Cdk16	c.374G>A	p.Arg125Gln	missense_variant	MODERATE	101	0	0.011	77	34	0.449	6.33654
Aplan-10C-3676-Thy_vs_Aplan-10C-3676-Tail	chrX	37483601	37483601	G	C	Rhox4c	c.505G>C	p.Glu169Gln	missense_variant	MODERATE	301	0	0.004287	233	89	0.378	5.96264
Aplan-10C-3676-Thy_vs_Aplan-10C-3676-Tail	chrX	37661239	37661239	G	C	Rhox3h	c.303C>G	p.Pro101Pro	synonymous_variant	LOW	205	0	0.005489	142	50	0.374	6.20718
Aplan-10C-3676-Thy_vs_Aplan-10C-3676-Tail	chrX	48122544	48122544	G	C	Xpnpep2	c.956G>C	p.Arg319Pro	missense_variant	MODERATE	137	1	0.018	97	28	0.343	6.67903
Aplan-10C-3676-Thy_vs_Aplan-10C-3676-Tail	chrX	48135137	48135137	G	C	Xpnpep2	c.1994G>C	p.Arg665Pro	missense_variant	MODERATE	149	1	0.017	82	18	0.231	6.2199
Aplan-10C-3676-Thy_vs_Aplan-10C-3676-Tail	chrX	48278754	48278754	C	G	Utp14a	c.2021C>G	p.Ala674Gly	missense_variant	MODERATE	76	0	0.016	70	16	0.22	5.54426
Aplan-10C-3676-Thy_vs_Aplan-10C-3676-Tail	chrX	48379282	48379282	G	C	Bcorl1	c.4027G>C	p.Gly1343Arg	missense_variant	MODERATE	26	0	0.04	19	7	0.368	2.95453
Aplan-10C-3676-Thy_vs_Aplan-10C-3676-Tail	chrX	51164476	51164476	G	A	Mbnl3	c.119C>T	p.Pro40Leu	missense_variant	MODERATE	58	0	0.021	42	11	0.282	4.51965
Aplan-10C-3676-Thy_vs_Aplan-10C-3676-Tail	chrX	56788144	56788144	C	G	Fhl1	c.130C>G	p.Arg44Gly	missense_variant	MODERATE	35	0	0.034	20	5	0.294	2.35098
Aplan-10C-3676-Thy_vs_Aplan-10C-3676-Tail	chrX	57223361	57223361	G	C	Cd40lg	c.557G>C	p.Arg186Pro	missense_variant	MODERATE	73	0	0.016	63	28	0.463	5.93719
Aplan-10C-3676-Thy_vs_Aplan-10C-3676-Tail	chrX	57302382	57302382	C	G	Arhgef6	c.456G>C	p.Ala152Ala	synonymous_variant	LOW	30	0	0.041	30	6	0.25	1.62487
Aplan-10C-3676-Thy_vs_Aplan-10C-3676-Tail	chrX	65048026	65048026	G	C	Ctag2	c.342G>C	p.Pro114Pro	synonymous_variant	LOW	66	0	0.017	56	17	0.288	6.41827
Aplan-10C-3676-Thy_vs_Aplan-10C-3676-Tail	chrX	73433991	73433991	G	C	Trex2	c.649C>G	p.Arg217Gly	missense_variant	MODERATE	23	0	0.053	16	8	0.534	3.67946
Aplan-10C-3676-Thy_vs_Aplan-10C-3676-Tail	chrX	75411676	75411676	G	C	Mtcp1	c.64C>G	p.Arg22Gly	missense_variant	MODERATE	134	0	0.00887	80	21	0.261	6.75593
Aplan-10C-3676-Thy_vs_Aplan-10C-3676-Tail	chrX	101258532	101258532	G	C	Foxo4	c.809G>C	p.Arg270Pro	missense_variant	MODERATE	28	0	0.037	12	5	0.429	2.91951
Aplan-10C-3676-Thy_vs_Aplan-10C-3676-Tail	chrX	101274272	101274272	C	G	Med12	c.12C>G	p.Phe4Leu	missense_variant	MODERATE	14	0	0.077	8	2	0.375	0.916454
Aplan-10C-3676-Thy_vs_Aplan-10C-3676-Tail	chrX	101733013	101733013	C	G	Cxcr3	c.42G>C	p.Ser14Ser	synonymous_variant	LOW	66	0	0.018	36	11	0.285	5.47206
Aplan-10C-3676-Thy_vs_Aplan-10C-3676-Tail	chrX	104501789	104501789	C	G	Uprt	c.610C>G	p.Arg204Gly	missense_variant	MODERATE	72	0	0.017	44	19	0.447	6.19994
Aplan-10C-3676-Thy_vs_Aplan-10C-3676-Tail	chrX	105123123	105123123	G	C	Magee1	c.2513G>C	p.Arg838Pro	missense_variant	MODERATE	71	2	0.034	48	14	0.272	4.32315
Aplan-10C-3676-Thy_vs_Aplan-10C-3676-Tail	chrX	106431340	106431340	G	C	Fndc3c1	c.2905C>G	p.Arg969Gly	missense_variant	MODERATE	92	0	0.014	65	22	0.296	6.49408
Aplan-10C-3676-Thy_vs_Aplan-10C-3676-Tail	chrX	113047432	113047432	C	G	Chm	c.1701G>C	p.Ser567Ser	synonymous_variant	LOW	56	0	0.022	48	10	0.226	3.60103
Aplan-10C-3676-Thy_vs_Aplan-10C-3676-Tail	chrX	134435065	134435065	C	G	Drp2	c.1018C>G	p.Arg340Gly	missense_variant	MODERATE	40	0	0.027	24	9	0.391	4.32353
Aplan-10C-3676-Thy_vs_Aplan-10C-3676-Tail	chrX	136201362	136201362	G	C	Tceal5	c.426C>G	p.Cys142Trp	missense_variant	MODERATE	200	0	0.00621	156	72	0.462	5.92444
Aplan-10C-3676-Thy_vs_Aplan-10C-3676-Tail	chrX	140432198	140432198	G	C	Frmpd3	c.3911G>C	p.Arg1304Pro	missense_variant	MODERATE	38	0	0.029	15	7	0.534	4.37938
Aplan-10C-3676-Thy_vs_Aplan-10C-3676-Tail	chrX	140433337	140433337	G	C	Frmpd3	c.5050G>C	p.Val1684Leu	missense_variant	MODERATE	15	0	0.071	17	8	0.5	2.53417
Aplan-10C-3676-Thy_vs_Aplan-10C-3676-Tail	chrX	143820333	143820333	C	G	Capn6	c.128G>C	p.Arg43Pro	missense_variant	MODERATE	30	0	0.037	29	5	0.23	1.62487
Aplan-10C-3677-Thy_vs_Aplan-10C-3677-Tail	chr1	9724775	9724775	G	C	Vcpip1	c.3370C>G	p.Arg1124Gly	missense_variant	MODERATE	114	0	0.00981	178	76	0.431	5.9401
Aplan-10C-3677-Thy_vs_Aplan-10C-3677-Tail	chr1	36269377	36269377	C	G	Neurl3	c.353G>C	p.Arg118Pro	missense_variant	MODERATE	39	0	0.029	74	24	0.312	4.85705
Aplan-10C-3677-Thy_vs_Aplan-10C-3677-Tail	chr1	36420926	36420926	C	G	Fer1l5	c.5651C>G	p.Pro1884Arg	missense_variant	MODERATE	110	0	0.011	206	74	0.369	5.86455
Aplan-10C-3677-Thy_vs_Aplan-10C-3677-Tail	chr1	44180886	44180886	C	G	Ercc5	c.3317C>G	p.Ser1106Trp	missense_variant	MODERATE	48	0	0.025	60	21	0.346	6.13516
Aplan-10C-3677-Thy_vs_Aplan-10C-3677-Tail	chr1	51768732	51768732	C	G	Myo1b	c.2387G>C	p.Arg796Pro	missense_variant	MODERATE	110	0	0.011	91	32	0.362	5.91896
Aplan-10C-3677-Thy_vs_Aplan-10C-3677-Tail	chr1	52079754	52079754	G	C	Stat4	c.955G>C	p.Glu319Gln	missense_variant	MODERATE	104	0	0.012	120	43	0.349	5.97338
Aplan-10C-3677-Thy_vs_Aplan-10C-3677-Tail	chr1	53913356	53913356	C	G	Hecw2	c.2717G>C	p.Arg906Pro	missense_variant	MODERATE	74	0	0.015	92	36	0.4	5.98999
Aplan-10C-3677-Thy_vs_Aplan-10C-3677-Tail	chr1	63303071	63303071	G	C	Zdbf2	c.623G>C	p.Arg208Pro	missense_variant	MODERATE	150	0	0.00831	194	61	0.333	5.80426
Aplan-10C-3677-Thy_vs_Aplan-10C-3677-Tail	chr1	64616392	64616392	C	G	Mettl21a	c.28G>C	p.Ala10Pro	missense_variant	MODERATE	31	1	0.041	26	6	0.292	1.40418
Aplan-10C-3677-Thy_vs_Aplan-10C-3677-Tail	chr1	69870329	69870329	G	C	Spag16	c.584G>C	p.Arg195Pro	missense_variant	MODERATE	75	0	0.017	104	49	0.459	5.8999
Aplan-10C-3677-Thy_vs_Aplan-10C-3677-Tail	chr1	73914587	73914587	C	A	Tns1	c.5610G>T	p.Ala1870Ala	synonymous_variant	LOW	41	0	0.029	81	23	0.288	4.43536
Aplan-10C-3677-Thy_vs_Aplan-10C-3677-Tail	chr1	75418440	75418440	C	G	Speg	c.5367C>G	p.Gly1789Gly	synonymous_variant	LOW	61	0	0.02	74	22	0.3	6.37043
Aplan-10C-3677-Thy_vs_Aplan-10C-3677-Tail	chr1	75484576	75484576	C	G	Tmem198	c.944C>G	p.Pro315Arg	missense_variant&splice_region_variant	MODERATE	26	0	0.039	30	13	0.433	4.16196
Aplan-10C-3677-Thy_vs_Aplan-10C-3677-Tail	chr1	82680747	82680747	C	G	Col4a3	c.2550C>G	p.Pro850Pro	synonymous_variant	LOW	40	0	0.03	28	9	0.357	3.85339
Aplan-10C-3677-Thy_vs_Aplan-10C-3677-Tail	chr1	87824479	87824479	C	G	Sag	c.693C>G	p.Thr231Thr	synonymous_variant	LOW	121	0	0.01	135	30	0.215	6.12539
Aplan-10C-3677-Thy_vs_Aplan-10C-3677-Tail	chr1	87982026	87982026	G	C	Usp40	c.1705C>G	p.Arg569Gly	missense_variant	MODERATE	148	0	0.008362	181	39	0.206	5.83506
Aplan-10C-3677-Thy_vs_Aplan-10C-3677-Tail	chr1	91152672	91152672	C	G	Rbm44	c.581C>G	p.Ala194Gly	missense_variant	MODERATE	140	1	0.008331	183	40	0.212	5.9758
Aplan-10C-3677-Thy_vs_Aplan-10C-3677-Tail	chr1	93750343	93750343	C	G	Thap4	c.720G>C	p.Thr240Thr	synonymous_variant	LOW	67	0	0.017	88	30	0.373	6.06395
Aplan-10C-3677-Thy_vs_Aplan-10C-3677-Tail	chr1	128298602	128298602	C	G	Lct	c.4049G>C	p.Arg1350Pro	missense_variant	MODERATE	75	0	0.016	138	29	0.254	5.53544
Aplan-10C-3677-Thy_vs_Aplan-10C-3677-Tail	chr1	128303944	128303944	C	G	Lct	c.2167G>C	p.Ala723Pro	missense_variant	MODERATE	69	0	0.02	88	24	0.285	6.43046
Aplan-10C-3677-Thy_vs_Aplan-10C-3677-Tail	chr1	128349007	128349007	C	G	Mcm6	c.845G>C	p.Arg282Pro	missense_variant	MODERATE	54	0	0.021	79	18	0.25	4.36322
Aplan-10C-3677-Thy_vs_Aplan-10C-3677-Tail	chr1	130811367	130811367	G	C	Fcamr	c.407-4G>C		splice_region_variant&intron_variant	LOW	18	0	0.054	23	6	0.227	1.57546
Aplan-10C-3677-Thy_vs_Aplan-10C-3677-Tail	chr1	132455358	132455358	C	G	Dstyk	c.1762C>G	p.Arg588Gly	missense_variant	MODERATE	41	0	0.028	37	9	0.235	3.16611
Aplan-10C-3677-Thy_vs_Aplan-10C-3677-Tail	chr1	133729721	133729721	G	C	Atp2b4	c.2030C>G	p.Pro677Arg	missense_variant	MODERATE	32	0	0.031	40	10	0.291	2.76926
Aplan-10C-3677-Thy_vs_Aplan-10C-3677-Tail	chr1	134290423	134290423	G	C	Myog	c.368G>C	p.Arg123Pro	missense_variant	MODERATE	14	0	0.067	23	9	0.409	2.14629
Aplan-10C-3677-Thy_vs_Aplan-10C-3677-Tail	chr1	136154260	136154260	C	G	Kif21b	c.2045C>G	p.Thr682Arg	missense_variant	MODERATE	30	0	0.041	40	15	0.355	4.19361
Aplan-10C-3677-Thy_vs_Aplan-10C-3677-Tail	chr1	136468724	136468724	G	C	Kif14	c.767G>C	p.Gly256Ala	missense_variant	MODERATE	71	0	0.017	85	16	0.2	4.22052
Aplan-10C-3677-Thy_vs_Aplan-10C-3677-Tail	chr1	154472151	154472151	C	G	Cacna1e	c.2863G>C	p.Val955Leu	missense_variant	MODERATE	70	0	0.018	91	21	0.239	5.34735
Aplan-10C-3677-Thy_vs_Aplan-10C-3677-Tail	chr1	158509988	158509988	C	T	Astn1	c.1263C>T	p.Ile421Ile	synonymous_variant	LOW	84	0	0.014	90	26	0.28	6.22439
Aplan-10C-3677-Thy_vs_Aplan-10C-3677-Tail	chr1	159924193	159924193	C	G	Tnr	c.4057C>G	p.Arg1353Gly	missense_variant	MODERATE	45	0	0.029	66	18	0.315	4.45703
Aplan-10C-3677-Thy_vs_Aplan-10C-3677-Tail	chr1	161032187	161032187	C	T	Zbtb37	c.547G>A	p.Val183Met	missense_variant	MODERATE	100	0	0.011	153	40	0.259	6.04556
Aplan-10C-3677-Thy_vs_Aplan-10C-3677-Tail	chr1	161060817	161060817	G	C	Dars2	c.532C>G	p.Arg178Gly	missense_variant	MODERATE	55	0	0.021	95	45	0.456	5.99462
Aplan-10C-3677-Thy_vs_Aplan-10C-3677-Tail	chr1	164385723	164385723	C	G	Nme7	c.969C>G	p.Ser323Ser	synonymous_variant	LOW	89	0	0.014	141	35	0.241	6.11303
Aplan-10C-3677-Thy_vs_Aplan-10C-3677-Tail	chr1	166099085	166099085	C	G	Dusp27	c.2957G>C	p.Arg986Pro	missense_variant	MODERATE	75	0	0.015	128	42	0.302	6.31956
Aplan-10C-3677-Thy_vs_Aplan-10C-3677-Tail	chr1	172244160	172244160	C	G	Atp1a4	c.1367G>C	p.Arg456Pro	missense_variant&splice_region_variant	MODERATE	58	0	0.019	67	23	0.349	5.95992
Aplan-10C-3677-Thy_vs_Aplan-10C-3677-Tail	chr1	180169447	180169447	G	C	Coq8a	c.1216C>G	p.Gln406Glu	missense_variant	MODERATE	35	0	0.029	51	14	0.289	3.27053
Aplan-10C-3677-Thy_vs_Aplan-10C-3677-Tail	chr1	180442680	180442680	G	C	Stum	c.246C>G	p.Thr82Thr	synonymous_variant	LOW	13	0	0.077	25	8	0.273	1.47435
Aplan-10C-3677-Thy_vs_Aplan-10C-3677-Tail	chr1	182276773	182276773	G	C	Degs1	c.946C>G	p.Pro316Ala	missense_variant	MODERATE	71	0	0.016	109	52	0.46	6.23996
Aplan-10C-3677-Thy_vs_Aplan-10C-3677-Tail	chr1	191985381	191985381	C	G	Rd3	c.466C>G	p.Arg156Gly	missense_variant	MODERATE	34	0	0.033	59	20	0.38	4.43827
Aplan-10C-3677-Thy_vs_Aplan-10C-3677-Tail	chr1	191997754	191997754	G	C	Traf5	c.1212C>G	p.Asp404Glu	missense_variant	MODERATE	35	0	0.03	46	11	0.238	2.73725
Aplan-10C-3677-Thy_vs_Aplan-10C-3677-Tail	chr1	193334458	193334458	G	C	Lamb3	c.2171G>C	p.Arg724Pro	missense_variant	MODERATE	42	1	0.055	41	17	0.414	5.03318
Aplan-10C-3677-Thy_vs_Aplan-10C-3677-Tail	chr2	4597371	4597371	C	G	Frmd4a	c.1625C>G	p.Ser542Trp	missense_variant	MODERATE	119	0	0.011	166	65	0.367	6.17372
Aplan-10C-3677-Thy_vs_Aplan-10C-3677-Tail	chr2	9858562	9858562	G	C	Gata3	c.1140C>G	p.Asp380Glu	missense_variant	MODERATE	62	0	0.019	79	29	0.377	6.48055
Aplan-10C-3677-Thy_vs_Aplan-10C-3677-Tail	chr2	11681969	11681969	G	A	Il2ra	c.610G>A	p.Glu204Lys	missense_variant	MODERATE	73	0	0.018	92	42	0.427	6.24313
Aplan-10C-3677-Thy_vs_Aplan-10C-3677-Tail	chr2	17996794	17996794	C	G	H2afb1	c.80G>C	p.Arg27Pro	missense_variant	MODERATE	221	0	0.005332	320	117	0.36	5.86503
Aplan-10C-3677-Thy_vs_Aplan-10C-3677-Tail	chr2	18046152	18046152	C	G	Skida1	c.2188G>C	p.Ala730Pro	missense_variant	MODERATE	119	1	0.009824	191	72	0.375	5.71779
Aplan-10C-3677-Thy_vs_Aplan-10C-3677-Tail	chr2	19296849	19296849	C	G	Armc3	c.1965C>G	p.Ser655Ser	synonymous_variant	LOW	113	0	0.011	183	67	0.373	5.82894
Aplan-10C-3677-Thy_vs_Aplan-10C-3677-Tail	chr2	25231715	25231715	C	G	Slc34a3	c.706G>C	p.Asp236His	missense_variant	MODERATE	37	0	0.032	67	21	0.34	4.28158
Aplan-10C-3677-Thy_vs_Aplan-10C-3677-Tail	chr2	25269385	25269385	G	A	Tprn	c.2217G>A	p.Ser739Ser	synonymous_variant	LOW	88	0	0.014	111	45	0.389	5.97602
Aplan-10C-3677-Thy_vs_Aplan-10C-3677-Tail	chr2	25271967	25271967	C	G	Ssna1	c.214G>C	p.Asp72His	missense_variant	MODERATE	28	0	0.04	47	15	0.341	3.24826
Aplan-10C-3677-Thy_vs_Aplan-10C-3677-Tail	chr2	25438877	25438877	C	G	Abca2	c.2829C>G	p.Ala943Ala	synonymous_variant	LOW	25	0	0.045	36	14	0.412	3.49124
Aplan-10C-3677-Thy_vs_Aplan-10C-3677-Tail	chr2	25499846	25499846	G	C	C8g	c.268C>G	p.Arg90Gly	missense_variant	MODERATE	33	0	0.031	43	20	0.513	5.75122
Aplan-10C-3677-Thy_vs_Aplan-10C-3677-Tail	chr2	25626062	25626062	G	C	Fcna	c.442C>G	p.Arg148Gly	missense_variant	MODERATE	44	0	0.025	73	35	0.5	6.03815
Aplan-10C-3677-Thy_vs_Aplan-10C-3677-Tail	chr2	25911191	25911191	C	G	Kcnt1	c.3280C>G	p.Arg1094Gly	missense_variant	MODERATE	17	0	0.063	36	8	0.222	1.35897
Aplan-10C-3677-Thy_vs_Aplan-10C-3677-Tail	chr2	26357638	26357638	G	C	Card9	c.634C>G	p.Arg212Gly	missense_variant	MODERATE	32	0	0.034	38	12	0.323	3.55954
Aplan-10C-3677-Thy_vs_Aplan-10C-3677-Tail	chr2	26430140	26430140	C	G	Sec16a	c.4285G>C	p.Gly1429Arg	missense_variant	MODERATE	36	0	0.033	36	13	0.375	4.1859
Aplan-10C-3677-Thy_vs_Aplan-10C-3677-Tail	chr2	27220652	27220652	G	C	Sardh	c.1801C>G	p.Arg601Gly	missense_variant	MODERATE	34	0	0.035	38	15	0.364	4.82402
Aplan-10C-3677-Thy_vs_Aplan-10C-3677-Tail	chr2	27271767	27271767	C	G	Vav2	c.2105+8G>C		splice_region_variant&intron_variant	LOW	42	0	0.028	50	21	0.411	6.48569
Aplan-10C-3677-Thy_vs_Aplan-10C-3677-Tail	chr2	27952358	27952358	C	G	Col5a1	c.1244C>G	p.Pro415Arg	missense_variant	MODERATE	49	0	0.025	84	33	0.385	6.22472
Aplan-10C-3677-Thy_vs_Aplan-10C-3677-Tail	chr2	28579607	28579607	C	T	Gtf3c5	c.284G>A	p.Arg95Gln	missense_variant	MODERATE	48	0	0.023	70	20	0.327	5.05403
Aplan-10C-3677-Thy_vs_Aplan-10C-3677-Tail	chr2	28834027	28834027	G	C	Gtf3c4	c.1692C>G	p.Ser564Arg	missense_variant	MODERATE	136	0	0.009053	170	67	0.378	6.16698
Aplan-10C-3677-Thy_vs_Aplan-10C-3677-Tail	chr2	29065654	29065654	C	G	Ttf1	c.1029C>G	p.Val343Val	synonymous_variant	LOW	52	0	0.02	72	26	0.36	6.08189
Aplan-10C-3677-Thy_vs_Aplan-10C-3677-Tail	chr2	29247907	29247907	C	G	Ntng2	c.134G>C	p.Arg45Pro	missense_variant	MODERATE	57	0	0.02	58	17	0.306	5.41282
Aplan-10C-3677-Thy_vs_Aplan-10C-3677-Tail	chr2	31834318	31834318	C	G	Fibcd1	c.677G>C	p.Arg226Pro	missense_variant	MODERATE	48	0	0.024	64	39	0.582	5.98136
Aplan-10C-3677-Thy_vs_Aplan-10C-3677-Tail	chr2	34435153	34435153	C	T	Mapkap1	c.280C>T	p.Arg94Cys	missense_variant	MODERATE	72	0	0.018	91	16	0.201	4.17613
Aplan-10C-3677-Thy_vs_Aplan-10C-3677-Tail	chr2	34712200	34712200	G	C	Gapvd1	c.1934C>G	p.Pro645Arg	missense_variant	MODERATE	118	0	0.01	138	52	0.38	6.14121
Aplan-10C-3677-Thy_vs_Aplan-10C-3677-Tail	chr2	35380411	35380411	C	G	4930402F06Rik	c.277G>C	p.Val93Leu	missense_variant	MODERATE	133	0	0.01	116	23	0.225	6.37402
Aplan-10C-3677-Thy_vs_Aplan-10C-3677-Tail	chr2	35720179	35720179	G	C	Dab2ip	c.2405G>C	p.Arg802Pro	missense_variant	MODERATE	43	0	0.024	46	21	0.425	6.39737
Aplan-10C-3677-Thy_vs_Aplan-10C-3677-Tail	chr2	35721298	35721298	C	G	Dab2ip	c.3005C>G	p.Thr1002Arg	missense_variant	MODERATE	28	0	0.041	46	13	0.289	2.92137
Aplan-10C-3677-Thy_vs_Aplan-10C-3677-Tail	chr2	37509061	37509061	C	G	Rabgap1	c.1762C>G	p.Arg588Gly	missense_variant	MODERATE	59	0	0.019	112	31	0.277	5.97553
Aplan-10C-3677-Thy_vs_Aplan-10C-3677-Tail	chr2	37802061	37802061	C	G	Dennd1a	c.1790G>C	p.Arg597Pro	missense_variant	MODERATE	76	0	0.015	124	38	0.324	5.88216
Aplan-10C-3677-Thy_vs_Aplan-10C-3677-Tail	chr2	38957755	38957755	G	C	Olfml2a	c.1325G>C	p.Arg442Pro	missense_variant	MODERATE	37	0	0.03	52	11	0.269	2.66286
Aplan-10C-3677-Thy_vs_Aplan-10C-3677-Tail	chr2	43563009	43563009	C	G	Kynu	c.43C>G	p.Arg15Gly	missense_variant	MODERATE	45	0	0.027	78	31	0.398	6.02278
Aplan-10C-3677-Thy_vs_Aplan-10C-3677-Tail	chr2	44116640	44116640	C	G	Arhgap15	c.768C>G	p.Arg256Arg	synonymous_variant	LOW	133	2	0.019	130	40	0.341	5.92288
Aplan-10C-3677-Thy_vs_Aplan-10C-3677-Tail	chr2	49946193	49946193	C	G	Lypd6b	c.385C>G	p.Arg129Gly	missense_variant	MODERATE	84	0	0.014	136	47	0.354	6.00225
Aplan-10C-3677-Thy_vs_Aplan-10C-3677-Tail	chr2	52111980	52111980	C	G	Rif1	c.5445C>G	p.Tyr1815*	stop_gained	HIGH	91	0	0.012	168	66	0.395	5.95501
Aplan-10C-3677-Thy_vs_Aplan-10C-3677-Tail	chr2	52161371	52161371	C	G	Neb	c.19896G>C	p.Ser6632Ser	synonymous_variant	LOW	198	0	0.006482	189	53	0.304	5.85318
Aplan-10C-3677-Thy_vs_Aplan-10C-3677-Tail	chr2	59843448	59843448	C	G	Tanc1	c.4896C>G	p.Ser1632Ser	synonymous_variant	LOW	49	1	0.04	60	17	0.268	3.80347
Aplan-10C-3677-Thy_vs_Aplan-10C-3677-Tail	chr2	59861645	59861645	C	A	Wdsub1	c.1042G>T	p.Val348Phe	missense_variant	MODERATE	126	0	0.01	179	78	0.43	5.96123
Aplan-10C-3677-Thy_vs_Aplan-10C-3677-Tail	chr2	60352932	60352932	G	C	Ly75	c.1505C>G	p.Pro502Arg	missense_variant	MODERATE	137	2	0.018	214	85	0.374	5.98433
Aplan-10C-3677-Thy_vs_Aplan-10C-3677-Tail	chr2	60447486	60447486	G	C	Pla2r1	c.2492C>G	p.Ala831Gly	missense_variant	MODERATE	50	0	0.023	74	18	0.279	4.37415
Aplan-10C-3677-Thy_vs_Aplan-10C-3677-Tail	chr2	62264060	62264060	G	C	Slc4a10	c.1442+7G>C		splice_region_variant&intron_variant	LOW	25	0	0.042	39	12	0.281	2.70272
Aplan-10C-3677-Thy_vs_Aplan-10C-3677-Tail	chr2	65460820	65460820	G	C	Scn3a	c.5581C>G	p.Arg1861Gly	missense_variant	MODERATE	166	1	0.007541	259	85	0.332	6.03162
Aplan-10C-3677-Thy_vs_Aplan-10C-3677-Tail	chr2	65670679	65670679	C	G	Scn2a1	c.184C>G	p.Leu62Val	missense_variant	MODERATE	88	0	0.014	127	49	0.373	5.68963
Aplan-10C-3677-Thy_vs_Aplan-10C-3677-Tail	chr2	66483690	66483690	G	C	Scn9a	c.5683C>G	p.Gln1895Glu	missense_variant	MODERATE	141	0	0.007918	165	57	0.326	5.85455
Aplan-10C-3677-Thy_vs_Aplan-10C-3677-Tail	chr2	66547223	66547223	G	C	Scn9a	c.1114C>G	p.Arg372Gly	missense_variant	MODERATE	53	0	0.02	65	17	0.266	4.68813
Aplan-10C-3677-Thy_vs_Aplan-10C-3677-Tail	chr2	69259512	69259512	G	C	Abcb11	c.3027C>G	p.Tyr1009*	stop_gained	HIGH	109	0	0.011	130	31	0.239	6.0107
Aplan-10C-3677-Thy_vs_Aplan-10C-3677-Tail	chr2	70105427	70105427	C	G	Myo3b	c.420C>G	p.Cys140Trp	missense_variant	MODERATE	52	0	0.023	90	33	0.373	6.10152
Aplan-10C-3677-Thy_vs_Aplan-10C-3677-Tail	chr2	70232439	70232439	G	C	Myo3b	c.1066G>C	p.Gly356Arg	missense_variant	MODERATE	110	1	0.012	142	35	0.237	5.95828
Aplan-10C-3677-Thy_vs_Aplan-10C-3677-Tail	chr2	71118139	71118139	G	C	Cybrd1	c.20G>C	p.Arg7Pro	missense_variant	MODERATE	33	0	0.033	52	21	0.442	5.30353
Aplan-10C-3677-Thy_vs_Aplan-10C-3677-Tail	chr2	72971412	72971412	G	C	Sp3	c.388C>G	p.Gln130Glu	missense_variant	MODERATE	198	0	0.005734	275	120	0.443	5.70754
Aplan-10C-3677-Thy_vs_Aplan-10C-3677-Tail	chr2	76372053	76372053	C	G	Rbm45	c.319C>G	p.Arg107Gly	missense_variant	MODERATE	94	0	0.012	114	44	0.364	5.96712
Aplan-10C-3677-Thy_vs_Aplan-10C-3677-Tail	chr2	76790833	76790833	G	C	Ttn	c.41920C>G	p.Arg13974Gly	missense_variant	MODERATE	121	0	0.01	143	37	0.287	6.27527
Aplan-10C-3677-Thy_vs_Aplan-10C-3677-Tail	chr2	76884619	76884619	G	C	Ttn	c.21328C>G	p.Pro7110Ala	missense_variant	MODERATE	99	0	0.012	138	33	0.259	6.21148
Aplan-10C-3677-Thy_vs_Aplan-10C-3677-Tail	chr2	84767334	84767334	G	C	Serping1	c.1202C>G	p.Thr401Arg	missense_variant	MODERATE	90	0	0.015	113	39	0.355	5.86907
Aplan-10C-3677-Thy_vs_Aplan-10C-3677-Tail	chr2	87491165	87491165	C	G	Pramel7	c.525G>C	p.Thr175Thr	synonymous_variant	LOW	212	0	0.005478	214	65	0.312	5.78964
Aplan-10C-3677-Thy_vs_Aplan-10C-3677-Tail	chr2	88034756	88034756	G	C	Olfr73	c.382C>G	p.Arg128Gly	missense_variant	MODERATE	125	0	0.008896	146	44	0.298	5.7521
Aplan-10C-3677-Thy_vs_Aplan-10C-3677-Tail	chr2	90282167	90282167	C	G	Olfr1272	c.407G>C	p.Arg136Pro	missense_variant	MODERATE	269	0	0.004468	374	130	0.363	5.61543
Aplan-10C-3677-Thy_vs_Aplan-10C-3677-Tail	chr2	91119342	91119342	C	G	Mybpc3	c.229C>G	p.Arg77Gly	missense_variant	MODERATE	36	0	0.032	35	12	0.344	4.1859
Aplan-10C-3677-Thy_vs_Aplan-10C-3677-Tail	chr2	91261584	91261584	C	G	Pacsin3	c.521C>G	p.Ala174Gly	missense_variant	MODERATE	59	0	0.021	71	18	0.234	4.99772
Aplan-10C-3677-Thy_vs_Aplan-10C-3677-Tail	chr2	91944031	91944031	C	G	Dgkz	c.1017G>C	p.Gln339His	missense_variant	MODERATE	131	0	0.009763	138	49	0.333	5.86355
Aplan-10C-3677-Thy_vs_Aplan-10C-3677-Tail	chr2	104654247	104654247	C	G	Cstf3	c.1215C>G	p.Ala405Ala	synonymous_variant	LOW	50	0	0.024	44	13	0.314	4.76359
Aplan-10C-3677-Thy_vs_Aplan-10C-3677-Tail	chr2	112248237	112248237	C	G	Nutm1	c.3332G>C	p.Arg1111Pro	missense_variant	MODERATE	33	0	0.032	51	19	0.419	4.64797
Aplan-10C-3677-Thy_vs_Aplan-10C-3677-Tail	chr2	119810187	119810187	C	T	Tyro3	c.1423C>T	p.Arg475*	stop_gained	HIGH	48	0	0.023	68	22	0.347	5.43525
Aplan-10C-3677-Thy_vs_Aplan-10C-3677-Tail	chr2	120300914	120300914	C	G	Pla2g4f	c.2327G>C	p.Arg776Pro	missense_variant	MODERATE	26	0	0.042	55	21	0.409	4.09915
Aplan-10C-3677-Thy_vs_Aplan-10C-3677-Tail	chr2	120446433	120446433	G	C	Ganc	c.1975G>C	p.Glu659Gln	missense_variant	MODERATE	84	0	0.015	83	28	0.333	6.37981
Aplan-10C-3677-Thy_vs_Aplan-10C-3677-Tail	chr2	120786094	120786094	C	G	Ttbk2	c.524G>C	p.Arg175Pro	missense_variant	MODERATE	78	0	0.016	93	43	0.473	6.02432
Aplan-10C-3677-Thy_vs_Aplan-10C-3677-Tail	chr2	120900567	120900567	G	C	Ubr1	c.3602C>G	p.Pro1201Arg	missense_variant	MODERATE	36	0	0.03	66	27	0.448	5.61263
Aplan-10C-3677-Thy_vs_Aplan-10C-3677-Tail	chr2	121358983	121358983	G	C	Ckmt1	c.134G>C	p.Arg45Thr	missense_variant	MODERATE	37	0	0.03	52	21	0.363	5.7799
Aplan-10C-3677-Thy_vs_Aplan-10C-3677-Tail	chr2	121429527	121429527	C	G	Pdia3	c.546C>G	p.Tyr182*	stop_gained	HIGH	135	0	0.009374	256	101	0.404	5.75693
Aplan-10C-3677-Thy_vs_Aplan-10C-3677-Tail	chr2	121439548	121439548	C	G	Ell3	c.1079G>C	p.Arg360Pro	missense_variant&splice_region_variant	MODERATE	170	0	0.007173	240	77	0.314	5.83902
Aplan-10C-3677-Thy_vs_Aplan-10C-3677-Tail	chr2	121548909	121548909	C	G	Frmd5	c.1459G>C	p.Gly487Arg	missense_variant	MODERATE	32	0	0.033	40	13	0.333	3.52003
Aplan-10C-3677-Thy_vs_Aplan-10C-3677-Tail	chr2	122305226	122305226	C	G	Duoxa1	c.391G>C	p.Ala131Pro	missense_variant	MODERATE	27	0	0.04	33	12	0.317	3.57515
Aplan-10C-3677-Thy_vs_Aplan-10C-3677-Tail	chr2	125195060	125195060	C	G	Slc12a1	c.2079C>G	p.His693Gln	missense_variant	MODERATE	97	0	0.014	104	28	0.286	6.04375
Aplan-10C-3677-Thy_vs_Aplan-10C-3677-Tail	chr2	125348160	125348160	C	G	Fbn1	c.4412G>C	p.Arg1471Pro	missense_variant	MODERATE	98	0	0.013	106	37	0.354	5.94519
Aplan-10C-3677-Thy_vs_Aplan-10C-3677-Tail	chr2	125361247	125361247	C	G	Fbn1	c.3655G>C	p.Gly1219Arg	missense_variant	MODERATE	125	0	0.01	157	42	0.254	5.88185
Aplan-10C-3677-Thy_vs_Aplan-10C-3677-Tail	chr2	125620066	125620066	C	G	Cep152	c.195G>C	p.Pro65Pro	synonymous_variant	LOW	61	0	0.019	87	22	0.273	5.22845
Aplan-10C-3677-Thy_vs_Aplan-10C-3677-Tail	chr2	125836138	125836138	G	C	Cops2	c.1066+4C>G		splice_region_variant&intron_variant	LOW	157	0	0.007873	247	73	0.303	5.8991
Aplan-10C-3677-Thy_vs_Aplan-10C-3677-Tail	chr2	126553324	126553324	G	C	Slc27a2	c.170G>C	p.Arg57Pro	missense_variant	MODERATE	29	0	0.042	33	14	0.414	4.51109
Aplan-10C-3677-Thy_vs_Aplan-10C-3677-Tail	chr2	127008897	127008897	G	C	Ap4e1	c.144G>C	p.Lys48Asn	missense_variant	MODERATE	10	0	0.084	23	5	0.23	0.535942
Aplan-10C-3677-Thy_vs_Aplan-10C-3677-Tail	chr2	127577830	127577830	G	C	Zfp661	c.389C>G	p.Pro130Arg	missense_variant	MODERATE	124	0	0.009993	136	44	0.336	6.16748
Aplan-10C-3677-Thy_vs_Aplan-10C-3677-Tail	chr2	128592678	128592678	G	C	Spdye4c	c.174G>C	p.Ala58Ala	synonymous_variant	LOW	32	0	0.034	56	14	0.274	2.81939
Aplan-10C-3677-Thy_vs_Aplan-10C-3677-Tail	chr2	128628637	128628637	G	C	Anapc1	c.4572C>G	p.Ala1524Ala	synonymous_variant	LOW	49	0	0.022	62	13	0.215	3.32252
Aplan-10C-3677-Thy_vs_Aplan-10C-3677-Tail	chr2	131141885	131141885	G	C	Hspa12b	c.904G>C	p.Gly302Arg	missense_variant	MODERATE	14	0	0.083	43	12	0.353	1.56996
Aplan-10C-3677-Thy_vs_Aplan-10C-3677-Tail	chr2	132058282	132058282	G	C	Slc23a2	c.1632C>G	p.Ile544Met	missense_variant	MODERATE	91	0	0.015	95	30	0.36	6.31825
Aplan-10C-3677-Thy_vs_Aplan-10C-3677-Tail	chr2	135954992	135954992	C	T	Plcb4	c.1316C>T	p.Ser439Leu	missense_variant	MODERATE	132	0	0.009739	160	39	0.241	5.92888
Aplan-10C-3677-Thy_vs_Aplan-10C-3677-Tail	chr2	150834373	150834373	G	C	Abhd12	c.1063C>G	p.Arg355Gly	missense_variant	MODERATE	39	0	0.031	69	22	0.347	4.60076
Aplan-10C-3677-Thy_vs_Aplan-10C-3677-Tail	chr2	150966165	150966165	G	C	Ninl	c.942C>G	p.Val314Val	synonymous_variant	LOW	61	0	0.018	70	23	0.333	6.8646
Aplan-10C-3677-Thy_vs_Aplan-10C-3677-Tail	chr2	151473664	151473664	G	C	4921509C19Rik	c.93C>G	p.Gly31Gly	synonymous_variant	LOW	180	0	0.006516	253	97	0.38	5.65664
Aplan-10C-3677-Thy_vs_Aplan-10C-3677-Tail	chr2	151868587	151868587	C	G	Rspo4	c.285C>G	p.Cys95Trp	missense_variant	MODERATE	23	0	0.048	29	10	0.333	2.8734
Aplan-10C-3677-Thy_vs_Aplan-10C-3677-Tail	chr2	152311371	152311371	G	C	Tbc1d20	c.820G>C	p.Val274Leu	missense_variant	MODERATE	33	0	0.035	50	11	0.285	2.58289
Aplan-10C-3677-Thy_vs_Aplan-10C-3677-Tail	chr2	152326228	152326228	G	A	Rbck1	c.448C>T	p.Arg150*	stop_gained	HIGH	24	0	0.047	32	6	0.214	1.4941
Aplan-10C-3677-Thy_vs_Aplan-10C-3677-Tail	chr2	154202625	154202625	C	G	Bpifb1	c.11C>G	p.Pro4Arg	missense_variant	MODERATE	45	0	0.025	63	30	0.5	6.14578
Aplan-10C-3677-Thy_vs_Aplan-10C-3677-Tail	chr2	154229486	154229486	C	G	Bpifb5	c.732C>G	p.Pro244Pro	synonymous_variant	LOW	106	1	0.023	168	58	0.35	6.11319
Aplan-10C-3677-Thy_vs_Aplan-10C-3677-Tail	chr2	155611697	155611697	C	G	Myh7b	c.40C>G	p.Leu14Val	missense_variant	MODERATE	85	0	0.014	113	42	0.348	5.93087
Aplan-10C-3677-Thy_vs_Aplan-10C-3677-Tail	chr2	155614182	155614182	C	G	Myh7b	c.486C>G	p.Asn162Lys	missense_variant	MODERATE	69	0	0.016	91	33	0.358	6.13521
Aplan-10C-3677-Thy_vs_Aplan-10C-3677-Tail	chr2	155622449	155622449	G	C	Myh7b	c.1783G>C	p.Val595Leu	missense_variant	MODERATE	74	0	0.016	100	28	0.31	5.9081
Aplan-10C-3677-Thy_vs_Aplan-10C-3677-Tail	chr2	155628788	155628788	G	C	Myh7b	c.3155G>C	p.Arg1052Pro	missense_variant	MODERATE	28	0	0.04	44	17	0.385	4.0338
Aplan-10C-3677-Thy_vs_Aplan-10C-3677-Tail	chr2	155792607	155792607	C	G	Mmp24	c.246C>G	p.Ser82Ser	synonymous_variant	LOW	87	2	0.018	131	54	0.45	5.89796
Aplan-10C-3677-Thy_vs_Aplan-10C-3677-Tail	chr2	155830073	155830073	G	C	Fam83c	c.1441C>G	p.Arg481Gly	missense_variant	MODERATE	51	0	0.021	77	20	0.262	4.65659
Aplan-10C-3677-Thy_vs_Aplan-10C-3677-Tail	chr2	155944537	155944537	C	G	Gdf5	c.519G>C	p.Thr173Thr	synonymous_variant	LOW	61	0	0.02	69	17	0.263	5.09807
Aplan-10C-3677-Thy_vs_Aplan-10C-3677-Tail	chr2	156096459	156096459	G	C	Rbm12	c.1892C>G	p.Pro631Arg	missense_variant	MODERATE	117	0	0.009797	213	81	0.379	5.99461
Aplan-10C-3677-Thy_vs_Aplan-10C-3677-Tail	chr2	156510770	156510770	C	G	Epb41l1	c.1338C>G	p.His446Gln	missense_variant	MODERATE	11	0	0.083	18	6	0.4	1.23988
Aplan-10C-3677-Thy_vs_Aplan-10C-3677-Tail	chr2	156937550	156937550	G	C	Ndrg3	c.694C>G	p.Arg232Gly	missense_variant&splice_region_variant	MODERATE	66	0	0.017	81	17	0.226	4.57401
Aplan-10C-3677-Thy_vs_Aplan-10C-3677-Tail	chr2	157020846	157020846	C	G	Soga1	c.4162G>C	p.Asp1388His	missense_variant	MODERATE	26	0	0.037	33	9	0.283	2.47914
Aplan-10C-3677-Thy_vs_Aplan-10C-3677-Tail	chr2	158210212	158210212	G	C	D630003M21Rik	c.1958C>G	p.Pro653Arg	missense_variant	MODERATE	35	0	0.032	32	10	0.333	3.5848
Aplan-10C-3677-Thy_vs_Aplan-10C-3677-Tail	chr2	158539780	158539780	C	G	Arhgap40	c.1182C>G	p.Asn394Lys	missense_variant	MODERATE	27	0	0.048	34	10	0.29	2.81032
Aplan-10C-3677-Thy_vs_Aplan-10C-3677-Tail	chr2	158541849	158541849	C	G	Arhgap40	c.1342C>G	p.Arg448Gly	missense_variant	MODERATE	26	0	0.05	22	8	0.421	3.07191
Aplan-10C-3677-Thy_vs_Aplan-10C-3677-Tail	chr2	158611244	158611244	G	C	Slc32a1	c.3G>C	p.Met1?	start_lost	HIGH	11	0	0.091	23	4	0.227	0.553019
Aplan-10C-3677-Thy_vs_Aplan-10C-3677-Tail	chr2	158696124	158696124	G	C	Ppp1r16b	c.164G>C	p.Arg55Pro	missense_variant	MODERATE	14	0	0.077	29	7	0.227	1.11652
Aplan-10C-3677-Thy_vs_Aplan-10C-3677-Tail	chr2	158846942	158846942	G	C	Dhx35	c.1836G>C	p.Ser612Ser	synonymous_variant	LOW	55	0	0.022	71	18	0.262	4.88964
Aplan-10C-3677-Thy_vs_Aplan-10C-3677-Tail	chr2	160782096	160782096	G	C	Zhx3	c.150C>G	p.Ser50Arg	missense_variant	MODERATE	48	0	0.023	69	14	0.227	3.43628
Aplan-10C-3677-Thy_vs_Aplan-10C-3677-Tail	chr2	160908378	160908378	C	T	Emilin3	c.1450G>A	p.Glu484Lys	missense_variant	MODERATE	44	0	0.025	51	21	0.423	6.47174
Aplan-10C-3677-Thy_vs_Aplan-10C-3677-Tail	chr2	163829013	163829013	C	G	Wisp2	c.439C>G	p.Arg147Gly	missense_variant	MODERATE	20	0	0.05	32	8	0.323	1.75843
Aplan-10C-3677-Thy_vs_Aplan-10C-3677-Tail	chr2	164042411	164042411	G	C	Pabpc1l	c.1067G>C	p.Arg356Pro	missense_variant	MODERATE	38	0	0.03	63	30	0.463	6.03017
Aplan-10C-3677-Thy_vs_Aplan-10C-3677-Tail	chr2	164414574	164414574	G	C	Rbpjl	c.1479G>C	p.Ala493Ala	synonymous_variant	LOW	24	0	0.046	23	4	0.238	1.30412
Aplan-10C-3677-Thy_vs_Aplan-10C-3677-Tail	chr2	164657194	164657194	G	C	Wfdc10	c.223G>C	p.Val75Leu	missense_variant	MODERATE	106	0	0.011	127	26	0.236	5.91024
Aplan-10C-3677-Thy_vs_Aplan-10C-3677-Tail	chr2	164734258	164734258	C	G	Wfdc3	c.112G>C	p.Gly38Arg	missense_variant	MODERATE	36	0	0.032	63	20	0.353	4.37214
Aplan-10C-3677-Thy_vs_Aplan-10C-3677-Tail	chr2	164758010	164758010	C	G	Dnttip1	c.505C>G	p.Arg169Gly	missense_variant	MODERATE	33	0	0.037	50	27	0.513	6.04912
Aplan-10C-3677-Thy_vs_Aplan-10C-3677-Tail	chr2	164825040	164825040	C	G	Zswim1	c.211C>G	p.Arg71Gly	missense_variant	MODERATE	90	0	0.013	141	55	0.38	5.87701
Aplan-10C-3677-Thy_vs_Aplan-10C-3677-Tail	chr2	164825469	164825469	C	G	Zswim1	c.640C>G	p.Arg214Gly	missense_variant	MODERATE	58	0	0.019	97	23	0.25	5.0484
Aplan-10C-3677-Thy_vs_Aplan-10C-3677-Tail	chr2	164825814	164825814	G	C	Zswim1	c.985G>C	p.Gly329Arg	missense_variant	MODERATE	30	0	0.034	52	11	0.23	2.23777
Aplan-10C-3677-Thy_vs_Aplan-10C-3677-Tail	chr2	165001988	165001988	G	C	Ncoa5	c.1334C>G	p.Ala445Gly	missense_variant	MODERATE	48	0	0.023	55	10	0.22	2.819
Aplan-10C-3677-Thy_vs_Aplan-10C-3677-Tail	chr2	165143780	165143780	G	C	Cdh22	c.885C>G	p.Arg295Arg	synonymous_variant	LOW	34	0	0.031	48	22	0.425	5.92003
Aplan-10C-3677-Thy_vs_Aplan-10C-3677-Tail	chr2	165353616	165353616	C	G	Zfp663	c.682G>C	p.Ala228Pro	missense_variant	MODERATE	152	0	0.007915	188	46	0.25	5.73907
Aplan-10C-3677-Thy_vs_Aplan-10C-3677-Tail	chr2	165515680	165515680	C	G	Slc2a10	c.1259C>G	p.Ser420Trp	missense_variant	MODERATE	67	0	0.019	61	20	0.337	6.2704
Aplan-10C-3677-Thy_vs_Aplan-10C-3677-Tail	chr2	166856483	166856483	C	G	Arfgef2	c.1872C>G	p.Ser624Ser	synonymous_variant	LOW	49	0	0.026	78	29	0.366	6.2904
Aplan-10C-3677-Thy_vs_Aplan-10C-3677-Tail	chr2	166894711	166894711	C	G	Arfgef2	c.5302C>G	p.Arg1768Gly	missense_variant	MODERATE	58	0	0.02	90	41	0.458	6.38893
Aplan-10C-3677-Thy_vs_Aplan-10C-3677-Tail	chr2	167983810	167983810	C	G	Fam65c	c.2227G>C	p.Val743Leu	missense_variant	MODERATE	20	0	0.054	24	10	0.432	3.06304
Aplan-10C-3677-Thy_vs_Aplan-10C-3677-Tail	chr2	168262486	168262486	C	G	Kcng1	c.1439G>C	p.Arg480Pro	missense_variant	MODERATE	25	0	0.045	50	9	0.222	1.60061
Aplan-10C-3677-Thy_vs_Aplan-10C-3677-Tail	chr2	168268629	168268629	C	G	Kcng1	c.614G>C	p.Arg205Pro	missense_variant	MODERATE	60	0	0.019	69	22	0.311	6.4952
Aplan-10C-3677-Thy_vs_Aplan-10C-3677-Tail	chr2	168534987	168534987	G	C	Nfatc2	c.1645C>G	p.Arg549Gly	missense_variant	MODERATE	49	0	0.024	64	21	0.316	5.63715
Aplan-10C-3677-Thy_vs_Aplan-10C-3677-Tail	chr2	168926243	168926243	G	C	Zfp64	c.1448C>G	p.Ser483Cys	missense_variant	MODERATE	36	0	0.031	36	11	0.353	3.40057
Aplan-10C-3677-Thy_vs_Aplan-10C-3677-Tail	chr2	169884569	169884569	G	C	Tshz2	c.1084G>C	p.Gly362Arg	missense_variant	MODERATE	61	0	0.017	58	22	0.401	6.34745
Aplan-10C-3677-Thy_vs_Aplan-10C-3677-Tail	chr2	172466335	172466335	C	G	Rtfdc1	c.649+4C>G		splice_region_variant&intron_variant	LOW	70	0	0.018	104	32	0.318	6.36585
Aplan-10C-3677-Thy_vs_Aplan-10C-3677-Tail	chr2	173033500	173033500	C	G	Rbm38	c.411-6C>G		splice_region_variant&intron_variant	LOW	26	0	0.042	18	9	0.562	4.16379
Aplan-10C-3677-Thy_vs_Aplan-10C-3677-Tail	chr2	173033516	173033516	C	G	Rbm38	c.421C>G	p.His141Asp	missense_variant	MODERATE	28	0	0.039	19	9	0.529	4.16882
Aplan-10C-3677-Thy_vs_Aplan-10C-3677-Tail	chr2	174091595	174091595	C	G	Stx16	c.366C>G	p.Ile122Met	missense_variant	MODERATE	40	0	0.028	51	21	0.439	5.88333
Aplan-10C-3677-Thy_vs_Aplan-10C-3677-Tail	chr2	174345415	174345415	G	C	Gnas	c.2909G>C	p.Arg970Pro	missense_variant	MODERATE	101	0	0.011	115	38	0.36	6.33187
Aplan-10C-3677-Thy_vs_Aplan-10C-3677-Tail	chr2	179874163	179874163	C	G	Cdh4	c.1133C>G	p.Thr378Arg	missense_variant	MODERATE	56	0	0.022	67	26	0.397	6.0838
Aplan-10C-3677-Thy_vs_Aplan-10C-3677-Tail	chr2	180052490	180052490	C	G	Ss18l1	c.96C>G	p.Ile32Met	missense_variant	MODERATE	54	0	0.025	44	17	0.361	6.82354
Aplan-10C-3677-Thy_vs_Aplan-10C-3677-Tail	chr2	180175214	180175214	C	G	Adrm1	c.678C>G	p.Arg226Arg	synonymous_variant	LOW	17	0	0.059	23	6	0.26	1.52983
Aplan-10C-3677-Thy_vs_Aplan-10C-3677-Tail	chr2	180197442	180197442	C	G	Lama5	c.2272G>C	p.Gly758Arg	missense_variant	MODERATE	79	0	0.016	97	31	0.297	6.21694
Aplan-10C-3677-Thy_vs_Aplan-10C-3677-Tail	chr2	180199249	180199249	G	C	Lama5	c.1537C>G	p.Arg513Gly	missense_variant	MODERATE	48	0	0.023	54	21	0.419	6.35109
Aplan-10C-3677-Thy_vs_Aplan-10C-3677-Tail	chr2	180202415	180202415	G	C	Lama5	c.1064C>G	p.Thr355Arg	missense_variant	MODERATE	30	0	0.037	47	16	0.318	3.91363
Aplan-10C-3677-Thy_vs_Aplan-10C-3677-Tail	chr2	180207250	180207250	C	G	Lama5	c.639G>C	p.Thr213Thr	synonymous_variant	LOW	51	0	0.022	73	19	0.273	4.75756
Aplan-10C-3677-Thy_vs_Aplan-10C-3677-Tail	chr2	180261133	180261133	C	G	Cables2	c.922G>C	p.Asp308His	missense_variant	MODERATE	177	0	0.007421	174	67	0.385	5.88113
Aplan-10C-3677-Thy_vs_Aplan-10C-3677-Tail	chr2	180327448	180327448	G	C	Gata5	c.966C>G	p.Pro322Pro	synonymous_variant	LOW	31	0	0.035	47	16	0.345	3.97918
Aplan-10C-3677-Thy_vs_Aplan-10C-3677-Tail	chr2	180616436	180616436	C	G	Col9a3	c.1647C>G	p.Ile549Met	missense_variant	MODERATE	47	0	0.024	56	16	0.3	4.42067
Aplan-10C-3677-Thy_vs_Aplan-10C-3677-Tail	chr2	180616523	180616523	C	G	Col9a3	c.1734C>G	p.Tyr578*	stop_gained	HIGH	33	0	0.031	47	9	0.219	2.05275
Aplan-10C-3677-Thy_vs_Aplan-10C-3677-Tail	chr2	181198458	181198458	C	G	Ptk6	c.754G>C	p.Ala252Pro	missense_variant	MODERATE	22	0	0.056	34	17	0.481	4.35319
Aplan-10C-3677-Thy_vs_Aplan-10C-3677-Tail	chr2	181265050	181265050	G	C	Gmeb2	c.288C>G	p.Cys96Trp	missense_variant	MODERATE	58	0	0.022	64	17	0.273	5.21168
Aplan-10C-3677-Thy_vs_Aplan-10C-3677-Tail	chr2	181494369	181494369	C	G	Abhd16b	c.1063C>G	p.Arg355Gly	missense_variant	MODERATE	98	0	0.011	143	43	0.307	5.7613
Aplan-10C-3677-Thy_vs_Aplan-10C-3677-Tail	chr2	181649135	181649135	C	G	Prpf6	c.2018C>G	p.Pro673Arg	missense_variant	MODERATE	21	0	0.053	16	3	0.217	1.14223
Aplan-10C-3677-Thy_vs_Aplan-10C-3677-Tail	chr3	5244156	5244156	C	G	Zfhx4	c.2441C>G	p.Ala814Gly	missense_variant	MODERATE	81	0	0.013	77	18	0.242	6.11894
Aplan-10C-3677-Thy_vs_Aplan-10C-3677-Tail	chr3	28029225	28029225	C	G	Pld1	c.493C>G	p.Arg165Gly	missense_variant	MODERATE	53	0	0.023	73	18	0.246	4.46251
Aplan-10C-3677-Thy_vs_Aplan-10C-3677-Tail	chr3	31154006	31154006	C	G	Cldn11	c.319C>G	p.Arg107Gly	missense_variant	MODERATE	50	0	0.023	81	25	0.323	5.86806
Aplan-10C-3677-Thy_vs_Aplan-10C-3677-Tail	chr3	41600139	41600139	C	G	Jade1	c.817C>G	p.Arg273Gly	missense_variant	MODERATE	47	0	0.025	54	13	0.234	3.81523
Aplan-10C-3677-Thy_vs_Aplan-10C-3677-Tail	chr3	58865122	58865122	C	G	Clrn1	c.337G>C	p.Val113Leu	missense_variant	MODERATE	53	0	0.024	100	42	0.442	6.08733
Aplan-10C-3677-Thy_vs_Aplan-10C-3677-Tail	chr3	59209629	59209629	C	G	P2ry13	c.727G>C	p.Ala243Pro	missense_variant	MODERATE	161	0	0.007188	147	31	0.211	6.34072
Aplan-10C-3677-Thy_vs_Aplan-10C-3677-Tail	chr3	59210169	59210169	C	G	P2ry13	c.187G>C	p.Val63Leu	missense_variant	MODERATE	51	0	0.022	66	14	0.227	3.62067
Aplan-10C-3677-Thy_vs_Aplan-10C-3677-Tail	chr3	86780163	86780163	G	C	Lrba	c.8374G>C	p.Gly2792Arg	missense_variant	MODERATE	27	0	0.05	21	4	0.227	1.51203
Aplan-10C-3677-Thy_vs_Aplan-10C-3677-Tail	chr3	87727463	87727463	C	G	Arhgef11	c.2632C>G	p.Arg878Gly	missense_variant	MODERATE	39	0	0.03	44	16	0.35	5.05607
Aplan-10C-3677-Thy_vs_Aplan-10C-3677-Tail	chr3	87783910	87783910	G	C	Ntrk1	c.946C>G	p.Arg316Gly	missense_variant	MODERATE	40	0	0.028	64	15	0.256	3.41072
Aplan-10C-3677-Thy_vs_Aplan-10C-3677-Tail	chr3	87849339	87849339	C	G	Sh2d2a	c.490C>G	p.Leu164Val	missense_variant	MODERATE	37	0	0.031	46	13	0.302	3.44343
Aplan-10C-3677-Thy_vs_Aplan-10C-3677-Tail	chr3	88101576	88101576	G	C	Iqgap3	c.1977G>C	p.Ala659Ala	synonymous_variant	LOW	50	0	0.025	67	33	0.475	6.01688
Aplan-10C-3677-Thy_vs_Aplan-10C-3677-Tail	chr3	88368788	88368788	C	G	Bglap3	c.256G>C	p.Ala86Pro	missense_variant	MODERATE	146	0	0.008152	174	43	0.265	6.13815
Aplan-10C-3677-Thy_vs_Aplan-10C-3677-Tail	chr3	88639443	88639443	C	G	Arhgef2	c.1669C>G	p.Arg557Gly	missense_variant	MODERATE	58	0	0.021	71	26	0.371	6.04166
Aplan-10C-3677-Thy_vs_Aplan-10C-3677-Tail	chr3	88748791	88748791	C	G	Syt11	c.970G>C	p.Gly324Arg	missense_variant	MODERATE	49	0	0.026	78	20	0.242	4.60433
Aplan-10C-3677-Thy_vs_Aplan-10C-3677-Tail	chr3	89182441	89182441	C	G	Clk2-scamp3	c.2297C>G	p.Pro766Arg	missense_variant	MODERATE	28	0	0.043	33	11	0.392	3.28881
Aplan-10C-3677-Thy_vs_Aplan-10C-3677-Tail	chr3	89184163	89184163	C	G	Fam189b	c.237C>G	p.Ser79Ser	synonymous_variant	LOW	59	0	0.02	47	15	0.334	5.93582
Aplan-10C-3677-Thy_vs_Aplan-10C-3677-Tail	chr3	89219434	89219434	G	C	Thbs3	c.854G>C	p.Arg285Pro	missense_variant	MODERATE	40	0	0.028	63	13	0.232	2.84351
Aplan-10C-3677-Thy_vs_Aplan-10C-3677-Tail	chr3	89959017	89959017	C	G	Atp8b2	c.64G>C	p.Glu22Gln	missense_variant	MODERATE	75	0	0.016	108	39	0.391	6.13927
Aplan-10C-3677-Thy_vs_Aplan-10C-3677-Tail	chr3	90122709	90122709	G	C	Nup210l	c.728G>C	p.Arg243Pro	missense_variant	MODERATE	59	0	0.022	68	25	0.357	6.20599
Aplan-10C-3677-Thy_vs_Aplan-10C-3677-Tail	chr3	93202456	93202456	C	G	Flg2	c.1790C>G	p.Ser597Trp	missense_variant	MODERATE	127	0	0.00884	144	34	0.238	5.82661
Aplan-10C-3677-Thy_vs_Aplan-10C-3677-Tail	chr3	94939747	94939747	C	G	Selenbp1	c.583C>G	p.Arg195Gly	missense_variant	MODERATE	126	0	0.009796	171	45	0.281	5.66243
Aplan-10C-3677-Thy_vs_Aplan-10C-3677-Tail	chr3	95171569	95171569	G	C	Sema6c	c.1729G>C	p.Gly577Arg	missense_variant	MODERATE	141	0	0.008376	199	53	0.292	6.25987
Aplan-10C-3677-Thy_vs_Aplan-10C-3677-Tail	chr3	95338952	95338952	G	C	Setdb1	c.1661C>G	p.Pro554Arg	missense_variant	MODERATE	35	0	0.03	33	10	0.343	3.4971
Aplan-10C-3677-Thy_vs_Aplan-10C-3677-Tail	chr3	95734835	95734835	G	C	Ecm1	c.1437C>G	p.Cys479Trp	missense_variant	MODERATE	63	0	0.021	72	15	0.259	4.38155
Aplan-10C-3677-Thy_vs_Aplan-10C-3677-Tail	chr3	95735854	95735854	C	G	Ecm1	c.1133G>C	p.Trp378Ser	missense_variant	MODERATE	31	0	0.037	38	11	0.314	3.15107
Aplan-10C-3677-Thy_vs_Aplan-10C-3677-Tail	chr3	95736169	95736169	C	G	Ecm1	c.818G>C	p.Arg273Pro	missense_variant	MODERATE	32	0	0.032	40	10	0.208	2.76926
Aplan-10C-3677-Thy_vs_Aplan-10C-3677-Tail	chr3	95833764	95833764	G	C	Prpf3	c.1832C>G	p.Thr611Arg	missense_variant	MODERATE	216	0	0.00609	306	89	0.277	5.77835
Aplan-10C-3677-Thy_vs_Aplan-10C-3677-Tail	chr3	95862868	95862868	G	C	Mrps21	c.148C>G	p.Arg50Gly	missense_variant	MODERATE	102	0	0.013	118	43	0.365	5.98335
Aplan-10C-3677-Thy_vs_Aplan-10C-3677-Tail	chr3	98135531	98135531	C	G	Notch2	c.4211C>G	p.Pro1404Arg	missense_variant	MODERATE	33	0	0.032	47	16	0.326	4.04361
Aplan-10C-3677-Thy_vs_Aplan-10C-3677-Tail	chr3	104655515	104655515	C	G	Slc16a1	c.1275C>G	p.Ile425Met	missense_variant	MODERATE	89	0	0.014	127	26	0.22	6.32642
Aplan-10C-3677-Thy_vs_Aplan-10C-3677-Tail	chr3	104655652	104655652	C	G	Slc16a1	c.1412C>G	p.Thr471Arg	missense_variant	MODERATE	60	0	0.019	89	20	0.239	4.85984
Aplan-10C-3677-Thy_vs_Aplan-10C-3677-Tail	chr3	105750263	105750263	G	C	Rap1a	c.39C>G	p.Gly13Gly	synonymous_variant	LOW	182	0	0.007367	250	65	0.257	5.96185
Aplan-10C-3677-Thy_vs_Aplan-10C-3677-Tail	chr3	105986510	105986510	G	C	Ovgp1	c.1598G>C	p.Gly533Ala	missense_variant	MODERATE	300	0	0.004028	441	107	0.24	5.6688
Aplan-10C-3677-Thy_vs_Aplan-10C-3677-Tail	chr3	108340687	108340687	C	G	Sort1	c.1347C>G	p.Thr449Thr	synonymous_variant	LOW	85	1	0.018	99	39	0.378	5.8126
Aplan-10C-3677-Thy_vs_Aplan-10C-3677-Tail	chr3	108413220	108413220	G	C	Celsr2	c.2275C>G	p.Arg759Gly	missense_variant	MODERATE	49	0	0.023	51	16	0.343	5.10688
Aplan-10C-3677-Thy_vs_Aplan-10C-3677-Tail	chr3	108941415	108941415	C	G	Henmt1	c.23C>G	p.Pro8Arg	missense_variant&splice_region_variant	MODERATE	63	0	0.021	89	21	0.243	5.28961
Aplan-10C-3677-Thy_vs_Aplan-10C-3677-Tail	chr3	116294858	116294858	C	G	Cdc14a	c.1314G>C	p.Pro438Pro	synonymous_variant	LOW	58	0	0.019	54	22	0.403	6.50949
Aplan-10C-3677-Thy_vs_Aplan-10C-3677-Tail	chr3	121235209	121235209	C	G	Tmem56	c.28G>C	p.Gly10Arg	missense_variant	MODERATE	43	0	0.026	47	17	0.4	5.47054
Aplan-10C-3677-Thy_vs_Aplan-10C-3677-Tail	chr3	126364850	126364850	C	G	Arsj	c.77C>G	p.Ala26Gly	missense_variant	MODERATE	32	0	0.033	34	8	0.235	2.30169
Aplan-10C-3677-Thy_vs_Aplan-10C-3677-Tail	chr3	129868547	129868547	G	C	Cfi	c.1174G>C	p.Gly392Arg	missense_variant	MODERATE	63	0	0.019	88	23	0.28	5.54618
Aplan-10C-3677-Thy_vs_Aplan-10C-3677-Tail	chr3	130575408	130575408	C	G	Col25a1	c.1690C>G	p.Arg564Gly	missense_variant&splice_region_variant	MODERATE	98	0	0.014	106	43	0.391	6.12116
Aplan-10C-3677-Thy_vs_Aplan-10C-3677-Tail	chr3	131643001	131643001	C	G	Papss1	c.1774C>G	p.Arg592Gly	missense_variant	MODERATE	66	0	0.018	58	23	0.396	6.9287
Aplan-10C-3677-Thy_vs_Aplan-10C-3677-Tail	chr3	135511968	135511968	C	G	Manba	c.544C>G	p.Arg182Gly	missense_variant	MODERATE	28	0	0.045	25	7	0.286	2.50605
Aplan-10C-3677-Thy_vs_Aplan-10C-3677-Tail	chr3	141803839	141803839	C	G	Unc5c	c.2079C>G	p.Thr693Thr	synonymous_variant	LOW	37	0	0.033	57	16	0.326	3.82799
Aplan-10C-3677-Thy_vs_Aplan-10C-3677-Tail	chr3	145314645	145314645	C	G	Col24a1	c.776C>G	p.Thr259Arg	missense_variant	MODERATE	90	0	0.012	113	31	0.26	5.99706
Aplan-10C-3677-Thy_vs_Aplan-10C-3677-Tail	chr3	145315164	145315164	C	G	Col24a1	c.1295C>G	p.Thr432Arg	missense_variant	MODERATE	100	0	0.011	127	32	0.261	5.90979
Aplan-10C-3677-Thy_vs_Aplan-10C-3677-Tail	chr3	152368655	152368655	C	G	Usp33	c.1132+5C>G		splice_region_variant&intron_variant	LOW	53	0	0.023	61	20	0.306	5.84622
Aplan-10C-3677-Thy_vs_Aplan-10C-3677-Tail	chr4	5799326	5799326	G	C	Fam110b	c.743G>C	p.Arg248Pro	missense_variant	MODERATE	63	0	0.017	72	15	0.234	4.38155
Aplan-10C-3677-Thy_vs_Aplan-10C-3677-Tail	chr4	8752290	8752290	C	G	Chd7	c.786C>G	p.Ser262Ser	synonymous_variant	LOW	33	0	0.029	43	18	0.432	5.27865
Aplan-10C-3677-Thy_vs_Aplan-10C-3677-Tail	chr4	14818181	14818181	G	GGCCAT	Otud6b	c.718_719insATGGC	p.Thr240fs	frameshift_variant	HIGH	129	0	0.009134	147	60	0.419	6.07284
Aplan-10C-3677-Thy_vs_Aplan-10C-3677-Tail	chr4	21874146	21874146	C	G	Pnisr	c.1888C>G	p.Arg630Gly	missense_variant	MODERATE	31	0	0.036	46	7	0.2	1.42673
Aplan-10C-3677-Thy_vs_Aplan-10C-3677-Tail	chr4	32738964	32738964	G	C	Mdn1	c.10784G>C	p.Arg3595Thr	missense_variant	MODERATE	84	0	0.014	134	51	0.4	6.01016
Aplan-10C-3677-Thy_vs_Aplan-10C-3677-Tail	chr4	33187065	33187065	C	G	Pm20d2	c.582G>C	p.Pro194Pro	synonymous_variant	LOW	57	0	0.02	84	19	0.211	4.61699
Aplan-10C-3677-Thy_vs_Aplan-10C-3677-Tail	chr4	40812692	40812692	C	G	B4galt1	c.832G>C	p.Gly278Arg	missense_variant	MODERATE	64	0	0.018	71	25	0.345	6.17377
Aplan-10C-3677-Thy_vs_Aplan-10C-3677-Tail	chr4	41712702	41712702	G	C	Rpp25l	c.72C>G	p.Asp24Glu	missense_variant	MODERATE	51	0	0.023	74	30	0.419	6.03598
Aplan-10C-3677-Thy_vs_Aplan-10C-3677-Tail	chr4	43654346	43654346	G	C	Hint2	c.466C>G	p.Arg156Gly	missense_variant	MODERATE	76	0	0.015	116	45	0.377	5.86385
Aplan-10C-3677-Thy_vs_Aplan-10C-3677-Tail	chr4	44994712	44994712	G	C	Zbtb5	c.671C>G	p.Ala224Gly	missense_variant	MODERATE	77	0	0.014	94	32	0.353	6.12694
Aplan-10C-3677-Thy_vs_Aplan-10C-3677-Tail	chr4	45026868	45026868	G	C	Polr1e	c.696G>C	p.Ala232Ala	synonymous_variant	LOW	49	0	0.025	50	22	0.425	6.02573
Aplan-10C-3677-Thy_vs_Aplan-10C-3677-Tail	chr4	45909438	45909438	G	C	Ccdc180	c.1599+6G>C		splice_region_variant&intron_variant	LOW	26	0	0.037	32	9	0.299	2.53352
Aplan-10C-3677-Thy_vs_Aplan-10C-3677-Tail	chr4	46025800	46025800	G	C	Tdrd7	c.2619G>C	p.Ala873Ala	synonymous_variant	LOW	65	0	0.017	96	40	0.44	6.2589
Aplan-10C-3677-Thy_vs_Aplan-10C-3677-Tail	chr4	46620590	46620590	C	G	Tbc1d2	c.1219G>C	p.Val407Leu	missense_variant	MODERATE	33	0	0.032	33	11	0.364	3.44324
Aplan-10C-3677-Thy_vs_Aplan-10C-3677-Tail	chr4	57709642	57709642	G	C	Palm2	c.586G>C	p.Ala196Pro	missense_variant	MODERATE	92	0	0.013	95	35	0.389	5.92086
Aplan-10C-3677-Thy_vs_Aplan-10C-3677-Tail	chr4	57943953	57943953	G	C	Txn1	c.270C>G	p.Ser90Ser	synonymous_variant	LOW	128	0	0.009993	187	54	0.293	5.82514
Aplan-10C-3677-Thy_vs_Aplan-10C-3677-Tail	chr4	58084805	58084805	C	G	Svep1	c.5527+5G>C		splice_region_variant&intron_variant	LOW	38	0	0.026	45	10	0.239	2.8222
Aplan-10C-3677-Thy_vs_Aplan-10C-3677-Tail	chr4	58138750	58138750	G	C	Svep1	c.1341C>G	p.His447Gln	missense_variant	MODERATE	42	0	0.03	31	11	0.367	4.62353
Aplan-10C-3677-Thy_vs_Aplan-10C-3677-Tail	chr4	59369618	59369618	G	C	Susd1	c.1209C>G	p.Asp403Glu	missense_variant	MODERATE	184	0	0.006908	223	61	0.275	5.88283
Aplan-10C-3677-Thy_vs_Aplan-10C-3677-Tail	chr4	63121340	63121340	C	G	Zfp618	c.896C>G	p.Thr299Arg	missense_variant	MODERATE	30	0	0.038	30	5	0.214	1.28245
Aplan-10C-3677-Thy_vs_Aplan-10C-3677-Tail	chr4	63152584	63152584	C	G	Ambp	c.257G>C	p.Arg86Pro	missense_variant&splice_region_variant	MODERATE	59	0	0.02	63	20	0.32	6.41375
Aplan-10C-3677-Thy_vs_Aplan-10C-3677-Tail	chr4	86445453	86445453	G	C	Saxo1	c.792C>G	p.Pro264Pro	synonymous_variant	LOW	88	0	0.013	128	36	0.268	5.8982
Aplan-10C-3677-Thy_vs_Aplan-10C-3677-Tail	chr4	103059927	103059927	G	C	Wdr78	c.1719C>G	p.Ala573Ala	synonymous_variant	LOW	156	0	0.008155	175	46	0.256	6.0412
Aplan-10C-3677-Thy_vs_Aplan-10C-3677-Tail	chr4	103066366	103066366	G	C	Wdr78	c.1265C>G	p.Thr422Arg	missense_variant	MODERATE	145	0	0.008706	166	47	0.317	5.95838
Aplan-10C-3677-Thy_vs_Aplan-10C-3677-Tail	chr4	106586382	106586382	G	C	Dhcr24	c.1256G>C	p.Ser419Thr	missense_variant	MODERATE	61	0	0.019	68	41	0.614	6.38786
Aplan-10C-3677-Thy_vs_Aplan-10C-3677-Tail	chr4	111828279	111828279	C	G	Spata6	c.1380C>G	p.Pro460Pro	synonymous_variant	LOW	86	0	0.014	146	93	0.671	5.72762
Aplan-10C-3677-Thy_vs_Aplan-10C-3677-Tail	chr4	114244603	114244603	C	G	Skint11	c.812C>G	p.Ala271Gly	missense_variant	MODERATE	72	0	0.016	134	29	0.216	5.58111
Aplan-10C-3677-Thy_vs_Aplan-10C-3677-Tail	chr4	115492207	115492207	C	G	Cyp4a14	c.655G>C	p.Glu219Gln	missense_variant	MODERATE	81	0	0.014	101	51	0.477	6.07316
Aplan-10C-3677-Thy_vs_Aplan-10C-3677-Tail	chr4	116524241	116524241	C	G	Ipp	c.936C>G	p.Cys312Trp	missense_variant	MODERATE	56	0	0.023	70	22	0.333	5.85641
Aplan-10C-3677-Thy_vs_Aplan-10C-3677-Tail	chr4	117002969	117002969	C	G	Hectd3	c.2383C>G	p.Arg795Gly	missense_variant	MODERATE	108	0	0.011	135	24	0.204	6.09989
Aplan-10C-3677-Thy_vs_Aplan-10C-3677-Tail	chr4	118529598	118529598	G	C	2610528J11Rik	c.139G>C	p.Ala47Pro	missense_variant	MODERATE	38	0	0.029	45	23	0.548	5.98454
Aplan-10C-3677-Thy_vs_Aplan-10C-3677-Tail	chr4	123408173	123408173	G	A	D830031N03Rik	c.2535C>T	p.Pro845Pro	synonymous_variant	LOW	120	0	0.009451	169	94	0.54	5.70655
Aplan-10C-3677-Thy_vs_Aplan-10C-3677-Tail	chr4	126058784	126058784	C	G	Oscp1	c.104C>G	p.Ala35Gly	missense_variant	MODERATE	35	0	0.032	55	12	0.255	2.57123
Aplan-10C-3677-Thy_vs_Aplan-10C-3677-Tail	chr4	126317310	126317310	G	A	Adprhl2	c.813C>T	p.Ser271Ser	synonymous_variant	LOW	41	0	0.031	35	26	0.69	5.78427
Aplan-10C-3677-Thy_vs_Aplan-10C-3677-Tail	chr4	129294107	129294107	C	G	Sync	c.931C>G	p.Arg311Gly	missense_variant	MODERATE	18	0	0.052	29	7	0.286	1.47002
Aplan-10C-3677-Thy_vs_Aplan-10C-3677-Tail	chr4	129306345	129306345	C	G	Sync	c.1204C>G	p.Gln402Glu	missense_variant	MODERATE	24	0	0.048	37	13	0.408	3.0908
Aplan-10C-3677-Thy_vs_Aplan-10C-3677-Tail	chr4	133064189	133064189	C	G	Ahdc1	c.2740C>G	p.Arg914Gly	missense_variant	MODERATE	15	0	0.071	25	7	0.279	1.48359
Aplan-10C-3677-Thy_vs_Aplan-10C-3677-Tail	chr4	133223617	133223617	C	G	Cd164l2	c.382C>G	p.Pro128Ala	missense_variant	MODERATE	38	0	0.028	46	10	0.25	2.78315
Aplan-10C-3677-Thy_vs_Aplan-10C-3677-Tail	chr4	134155700	134155700	G	T	Cep85	c.877C>A	p.Arg293Ser	missense_variant	MODERATE	89	2	0.026	120	75	0.621	5.90115
Aplan-10C-3677-Thy_vs_Aplan-10C-3677-Tail	chr4	134540917	134540917	C	G	Sepn1	c.1304G>C	p.Arg435Pro	missense_variant	MODERATE	44	0	0.028	53	36	0.639	5.72671
Aplan-10C-3677-Thy_vs_Aplan-10C-3677-Tail	chr4	135976417	135976417	G	C	Pithd1	c.614C>G	p.Pro205Arg	missense_variant	MODERATE	46	0	0.024	95	24	0.25	4.26754
Aplan-10C-3677-Thy_vs_Aplan-10C-3677-Tail	chr4	136932300	136932300	G	C	Epha8	c.2364C>G	p.Pro788Pro	synonymous_variant	LOW	35	0	0.032	23	14	0.546	7.09384
Aplan-10C-3677-Thy_vs_Aplan-10C-3677-Tail	chr4	136983231	136983231	G	C	Zbtb40	c.3596C>G	p.Pro1199Arg	missense_variant	MODERATE	34	0	0.036	47	17	0.39	4.42268
Aplan-10C-3677-Thy_vs_Aplan-10C-3677-Tail	chr4	137296641	137296641	C	G	Wnt4	c.918C>G	p.Cys306Trp	missense_variant	MODERATE	21	0	0.047	20	17	0.834	6.14375
Aplan-10C-3677-Thy_vs_Aplan-10C-3677-Tail	chr4	138253910	138253910	C	G	Sh2d5	c.39C>G	p.Asp13Glu	missense_variant	MODERATE	44	0	0.026	48	28	0.604	6.78732
Aplan-10C-3677-Thy_vs_Aplan-10C-3677-Tail	chr4	138317921	138317921	G	A	Pink1	c.931C>T	p.Arg311Cys	missense_variant	MODERATE	23	0	0.049	36	15	0.452	3.80031
Aplan-10C-3677-Thy_vs_Aplan-10C-3677-Tail	chr4	139425771	139425771	G	C	Ubr4	c.6139G>C	p.Val2047Leu	missense_variant	MODERATE	106	0	0.013	125	26	0.218	5.97138
Aplan-10C-3677-Thy_vs_Aplan-10C-3677-Tail	chr4	140515162	140515162	C	G	Arhgef10l	c.3671G>C	p.Arg1224Pro	missense_variant	MODERATE	13	0	0.077	31	8	0.323	1.08639
Aplan-10C-3677-Thy_vs_Aplan-10C-3677-Tail	chr4	149343003	149343003	C	G	Ube4b	c.2687G>C	p.Arg896Pro	missense_variant	MODERATE	74	0	0.018	78	16	0.231	4.85488
Aplan-10C-3677-Thy_vs_Aplan-10C-3677-Tail	chr4	149469050	149469050	C	G	Nmnat1	c.604G>C	p.Asp202His	missense_variant	MODERATE	65	0	0.018	89	63	0.705	5.93931
Aplan-10C-3677-Thy_vs_Aplan-10C-3677-Tail	chr4	149614138	149614138	C	G	Clstn1	c.180C>G	p.Ile60Met	missense_variant	MODERATE	27	0	0.04	37	12	0.334	3.14494
Aplan-10C-3677-Thy_vs_Aplan-10C-3677-Tail	chr4	149729553	149729553	C	G	Tmem201	c.589G>C	p.Asp197His	missense_variant	MODERATE	34	0	0.03	68	20	0.273	3.90534
Aplan-10C-3677-Thy_vs_Aplan-10C-3677-Tail	chr4	149906442	149906442	C	G	Spsb1	c.668G>C	p.Arg223Pro	missense_variant	MODERATE	30	0	0.036	63	14	0.218	2.41055
Aplan-10C-3677-Thy_vs_Aplan-10C-3677-Tail	chr4	149906767	149906767	C	G	Spsb1	c.343G>C	p.Val115Leu	missense_variant	MODERATE	67	0	0.018	73	19	0.277	5.87258
Aplan-10C-3677-Thy_vs_Aplan-10C-3677-Tail	chr4	149906858	149906858	C	G	Spsb1	c.252G>C	p.Thr84Thr	synonymous_variant	LOW	78	0	0.015	92	22	0.26	6.24368
Aplan-10C-3677-Thy_vs_Aplan-10C-3677-Tail	chr4	150934321	150934321	G	C	Tnfrsf9	c.448G>C	p.Gly150Arg	missense_variant	MODERATE	114	0	0.01	130	33	0.247	5.95081
Aplan-10C-3677-Thy_vs_Aplan-10C-3677-Tail	chr4	152028928	152028928	C	G	Tas1r1	c.1667G>C	p.Arg556Pro	missense_variant	MODERATE	20	0	0.056	32	13	0.4	3.1645
Aplan-10C-3677-Thy_vs_Aplan-10C-3677-Tail	chr4	152119835	152119835	C	G	Tnfrsf25	c.1232C>G	p.Pro411Arg	missense_variant	MODERATE	10	0	0.083	6	3	0.429	1.44716
Aplan-10C-3677-Thy_vs_Aplan-10C-3677-Tail	chr4	152538847	152538847	G	C	Nphp4	c.1977G>C	p.Thr659Thr	synonymous_variant	LOW	39	0	0.03	32	20	0.587	6.43541
Aplan-10C-3677-Thy_vs_Aplan-10C-3677-Tail	chr4	155957215	155957215	C	G	Ube2j2	c.666C>G	p.Pro222Pro	synonymous_variant	LOW	104	0	0.012	126	90	0.732	5.77606
Aplan-10C-3677-Thy_vs_Aplan-10C-3677-Tail	chr4	156172617	156172617	C	G	Agrn	c.3669G>C	p.Pro1223Pro	synonymous_variant	LOW	40	0	0.026	56	11	0.204	2.64725
Aplan-10C-3677-Thy_vs_Aplan-10C-3677-Tail	chr5	3657454	3657454	G	C	Tmbim7	c.-71G>C		5_prime_UTR_premature_start_codon_gain_variant	LOW	27	0	0.039	49	20	0.415	4.54326
Aplan-10C-3677-Thy_vs_Aplan-10C-3677-Tail	chr5	14676049	14676049	G	C	Pclo	c.4920G>C	p.Thr1640Thr	synonymous_variant	LOW	56	0	0.02	78	24	0.319	6.03123
Aplan-10C-3677-Thy_vs_Aplan-10C-3677-Tail	chr5	30117173	30117173	C	G	Gareml	c.2529C>G	p.Asp843Glu	missense_variant	MODERATE	70	0	0.016	106	40	0.393	6.12992
Aplan-10C-3677-Thy_vs_Aplan-10C-3677-Tail	chr5	30265412	30265412	G	C	Ept1	c.987G>C	p.Leu329Phe	missense_variant	MODERATE	55	0	0.02	84	23	0.288	5.55739
Aplan-10C-3677-Thy_vs_Aplan-10C-3677-Tail	chr5	31276871	31276871	G	C	Ift172	c.1522C>G	p.Arg508Gly	missense_variant&splice_region_variant	MODERATE	163	0	0.007553	185	53	0.273	5.71159
Aplan-10C-3677-Thy_vs_Aplan-10C-3677-Tail	chr5	33895154	33895154	C	G	Whsc1	c.4078C>G	p.Arg1360Gly	missense_variant	MODERATE	36	0	0.031	72	22	0.283	4.20086
Aplan-10C-3677-Thy_vs_Aplan-10C-3677-Tail	chr5	34464107	34464107	G	C	Fam193a	c.3410G>C	p.Arg1137Pro	missense_variant	MODERATE	35	0	0.034	65	25	0.368	5.37807
Aplan-10C-3677-Thy_vs_Aplan-10C-3677-Tail	chr5	35653059	35653059	G	C	Htra3	c.1278C>G	p.Ser426Arg	missense_variant	MODERATE	30	0	0.04	39	8	0.219	2.09377
Aplan-10C-3677-Thy_vs_Aplan-10C-3677-Tail	chr5	35997537	35997537	G	C	Afap1	c.2024G>C	p.Arg675Pro	missense_variant	MODERATE	42	0	0.03	50	13	0.279	3.76863
Aplan-10C-3677-Thy_vs_Aplan-10C-3677-Tail	chr5	50006917	50006917	C	G	Adgra3	c.719G>C	p.Arg240Pro	missense_variant	MODERATE	77	0	0.015	59	16	0.286	6.3771
Aplan-10C-3677-Thy_vs_Aplan-10C-3677-Tail	chr5	72604266	72604266	C	G	Cnga1	c.1904G>C	p.Arg635Pro	missense_variant	MODERATE	130	0	0.009062	145	57	0.401	5.87414
Aplan-10C-3677-Thy_vs_Aplan-10C-3677-Tail	chr5	73097411	73097411	G	C	Fryl	c.2687C>G	p.Ala896Gly	missense_variant	MODERATE	25	0	0.05	40	15	0.335	3.66876
Aplan-10C-3677-Thy_vs_Aplan-10C-3677-Tail	chr5	73100422	73100422	G	C	Fryl	c.2036C>G	p.Pro679Arg	missense_variant	MODERATE	64	0	0.017	86	22	0.263	5.73045
Aplan-10C-3677-Thy_vs_Aplan-10C-3677-Tail	chr5	73644307	73644307	C	G	Sgcb	c.214G>C	p.Val72Leu	missense_variant	MODERATE	65	0	0.017	74	24	0.322	5.77039
Aplan-10C-3677-Thy_vs_Aplan-10C-3677-Tail	chr5	75609463	75609463	C	G	Kit	c.534C>G	p.Arg178Arg	synonymous_variant	LOW	65	0	0.018	71	19	0.271	5.88385
Aplan-10C-3677-Thy_vs_Aplan-10C-3677-Tail	chr5	77321085	77321085	G	C	Polr2b	c.707G>C	p.Trp236Ser	missense_variant	MODERATE	103	0	0.013	91	25	0.301	5.84764
Aplan-10C-3677-Thy_vs_Aplan-10C-3677-Tail	chr5	92235736	92235736	C	G	Ppef2	c.1514G>C	p.Arg505Pro	missense_variant	MODERATE	18	0	0.057	34	9	0.296	1.70937
Aplan-10C-3677-Thy_vs_Aplan-10C-3677-Tail	chr5	92605244	92605244	G	C	Stbd1	c.592G>C	p.Gly198Arg	missense_variant	MODERATE	87	0	0.013	117	25	0.204	5.95846
Aplan-10C-3677-Thy_vs_Aplan-10C-3677-Tail	chr5	96812896	96812896	G	C	Anxa3	c.158G>C	p.Arg53Pro	missense_variant	MODERATE	99	0	0.013	128	29	0.221	6.02052
Aplan-10C-3677-Thy_vs_Aplan-10C-3677-Tail	chr5	103594619	103594619	C	G	Ptpn13	c.7203C>G	p.Phe2401Leu	missense_variant&splice_region_variant	MODERATE	46	1	0.03	60	27	0.435	6.60483
Aplan-10C-3677-Thy_vs_Aplan-10C-3677-Tail	chr5	105219017	105219017	G	C	Gbp10	c.1354-6C>G		splice_region_variant&intron_variant	LOW	198	0	0.00631	270	73	0.265	5.92168
Aplan-10C-3677-Thy_vs_Aplan-10C-3677-Tail	chr5	108645999	108645999	C	G	Tmem175	c.994C>G	p.Arg332Gly	missense_variant	MODERATE	88	0	0.012	106	29	0.281	6.66277
Aplan-10C-3677-Thy_vs_Aplan-10C-3677-Tail	chr5	113745723	113745723	C	G	Sart3	c.2227G>C	p.Gly743Arg	missense_variant	MODERATE	62	0	0.02	91	19	0.208	4.58838
Aplan-10C-3677-Thy_vs_Aplan-10C-3677-Tail	chr5	114121678	114121678	C	G	Usp30	c.1444C>G	p.Arg482Gly	missense_variant	MODERATE	118	0	0.01	150	47	0.325	5.88071
Aplan-10C-3677-Thy_vs_Aplan-10C-3677-Tail	chr5	114952580	114952580	G	C	Hnf1a	c.1497C>G	p.His499Gln	missense_variant&splice_region_variant	MODERATE	20	0	0.054	30	8	0.296	1.81056
Aplan-10C-3677-Thy_vs_Aplan-10C-3677-Tail	chr5	120620622	120620622	C	G	Ddx54	c.934-5C>G		splice_region_variant&intron_variant	LOW	43	0	0.026	54	20	0.41	5.87213
Aplan-10C-3677-Thy_vs_Aplan-10C-3677-Tail	chr5	120663773	120663773	G	C	Rasal1	c.776G>C	p.Arg259Pro	missense_variant	MODERATE	76	0	0.016	66	30	0.456	6.17632
Aplan-10C-3677-Thy_vs_Aplan-10C-3677-Tail	chr5	120919077	120919077	G	C	Oas1d	c.745G>C	p.Gly249Arg	missense_variant	MODERATE	61	0	0.02	106	33	0.311	5.88559
Aplan-10C-3677-Thy_vs_Aplan-10C-3677-Tail	chr5	121143097	121143097	G	C	Ptpn11	c.1517C>G	p.Ser506Trp	missense_variant	MODERATE	91	0	0.014	85	23	0.232	6.4367
Aplan-10C-3677-Thy_vs_Aplan-10C-3677-Tail	chr5	121482435	121482435	C	G	Tmem116	c.394C>G	p.Gln132Glu	missense_variant&splice_region_variant	MODERATE	50	0	0.025	47	14	0.318	4.91306
Aplan-10C-3677-Thy_vs_Aplan-10C-3677-Tail	chr5	123029577	123029577	G	C	Orai1	c.812G>C	p.Arg271Pro	missense_variant	MODERATE	51	0	0.022	85	40	0.458	5.83099
Aplan-10C-3677-Thy_vs_Aplan-10C-3677-Tail	chr5	123165844	123165844	C	G	Setd1b	c.5796C>G	p.Tyr1932*	stop_gained	HIGH	41	0	0.027	65	21	0.288	5.05553
Aplan-10C-3677-Thy_vs_Aplan-10C-3677-Tail	chr5	123864485	123864485	G	C	Hcar2	c.954C>G	p.Pro318Pro	synonymous_variant	LOW	63	0	0.017	97	24	0.253	5.38417
Aplan-10C-3677-Thy_vs_Aplan-10C-3677-Tail	chr5	123865237	123865237	C	G	Hcar2	c.202G>C	p.Val68Leu	missense_variant	MODERATE	42	0	0.027	77	18	0.251	3.58035
Aplan-10C-3677-Thy_vs_Aplan-10C-3677-Tail	chr5	124090122	124090122	C	G	Abcb9	c.55G>C	p.Gly19Arg	missense_variant	MODERATE	27	0	0.043	28	6	0.231	1.63439
Aplan-10C-3677-Thy_vs_Aplan-10C-3677-Tail	chr5	124405576	124405576	G	C	Sbno1	c.899C>G	p.Ala300Gly	missense_variant	MODERATE	56	0	0.022	71	20	0.267	5.59539
Aplan-10C-3677-Thy_vs_Aplan-10C-3677-Tail	chr5	125421097	125421097	C	G	Dhx37	c.2047G>C	p.Gly683Arg	missense_variant	MODERATE	35	0	0.032	61	26	0.399	5.81163
Aplan-10C-3677-Thy_vs_Aplan-10C-3677-Tail	chr5	130296702	130296702	C	G	Tyw1	c.1430C>G	p.Pro477Arg	missense_variant	MODERATE	26	0	0.045	38	12	0.353	3.03776
Aplan-10C-3677-Thy_vs_Aplan-10C-3677-Tail	chr5	132030990	132030990	G	A	Auts2	c.660C>T	p.Phe220Phe	splice_region_variant&synonymous_variant	LOW	83	0	0.016	64	23	0.362	6.12832
Aplan-10C-3677-Thy_vs_Aplan-10C-3677-Tail	chr5	134221763	134221763	G	C	Ncf1	c.1202C>G	p.Thr401Arg	missense_variant	MODERATE	27	0	0.04	50	13	0.303	2.53419
Aplan-10C-3677-Thy_vs_Aplan-10C-3677-Tail	chr5	134502602	134502602	C	A	Clip2	c.2348G>T	p.Arg783Leu	missense_variant	MODERATE	54	0	0.024	38	9	0.241	3.72668
Aplan-10C-3677-Thy_vs_Aplan-10C-3677-Tail	chr5	134503436	134503436	C	G	Clip2	c.1514G>C	p.Arg505Pro	missense_variant	MODERATE	16	0	0.067	19	7	0.464	2.03648
Aplan-10C-3677-Thy_vs_Aplan-10C-3677-Tail	chr5	134514063	134514063	G	C	Clip2	c.1255C>G	p.Arg419Gly	missense_variant	MODERATE	116	0	0.011	158	56	0.339	5.82802
Aplan-10C-3677-Thy_vs_Aplan-10C-3677-Tail	chr5	134729293	134729293	G	C	Eln	c.525C>G	p.Ile175Met	missense_variant	MODERATE	81	0	0.014	122	45	0.379	6.22226
Aplan-10C-3677-Thy_vs_Aplan-10C-3677-Tail	chr5	135980184	135980184	C	G	Zp3	c.51C>G	p.Pro17Pro	synonymous_variant	LOW	52	0	0.023	49	16	0.341	5.6791
Aplan-10C-3677-Thy_vs_Aplan-10C-3677-Tail	chr5	136988406	136988406	G	C	Plod3	c.282G>C	p.Arg94Ser	missense_variant	MODERATE	78	0	0.015	100	30	0.297	6.56961
Aplan-10C-3677-Thy_vs_Aplan-10C-3677-Tail	chr5	137624291	137624291	C	G	Fbxo24	c.212G>C	p.Arg71Pro	missense_variant	MODERATE	32	0	0.036	52	24	0.419	5.66347
Aplan-10C-3677-Thy_vs_Aplan-10C-3677-Tail	chr5	138065232	138065232	C	T	Smok3c	c.980C>T	p.Ala327Val	missense_variant	MODERATE	325	0	0.00356	472	191	0.398	5.69443
Aplan-10C-3677-Thy_vs_Aplan-10C-3677-Tail	chr5	139393386	139393386	C	G	Gpr146	c.942C>G	p.Cys314Trp	missense_variant	MODERATE	51	0	0.021	79	19	0.253	4.30357
Aplan-10C-3677-Thy_vs_Aplan-10C-3677-Tail	chr5	140433122	140433122	G	C	Eif3b	c.1569G>C	p.Pro523Pro	synonymous_variant	LOW	52	0	0.024	61	33	0.593	6.01467
Aplan-10C-3677-Thy_vs_Aplan-10C-3677-Tail	chr5	140629470	140629470	G	C	Ttyh3	c.1162C>G	p.Leu388Val	missense_variant	MODERATE	25	0	0.045	44	11	0.238	2.27196
Aplan-10C-3677-Thy_vs_Aplan-10C-3677-Tail	chr5	140675083	140675083	G	C	Iqce	c.1636C>G	p.Arg546Gly	missense_variant	MODERATE	27	0	0.049	42	14	0.351	3.35232
Aplan-10C-3677-Thy_vs_Aplan-10C-3677-Tail	chr5	140682452	140682452	C	G	Iqce	c.994G>C	p.Gly332Arg	missense_variant	MODERATE	66	0	0.017	100	24	0.244	5.75285
Aplan-10C-3677-Thy_vs_Aplan-10C-3677-Tail	chr5	141999863	141999863	C	G	Sdk1	c.2249C>G	p.Pro750Arg	missense_variant	MODERATE	89	0	0.013	76	25	0.377	5.90428
Aplan-10C-3677-Thy_vs_Aplan-10C-3677-Tail	chr5	143717155	143717155	G	C	Usp42	c.1710C>G	p.Asn570Lys	missense_variant	MODERATE	59	0	0.019	87	20	0.24	4.88879
Aplan-10C-3677-Thy_vs_Aplan-10C-3677-Tail	chr5	144833387	144833387	G	C	Trrap	c.8260G>C	p.Glu2754Gln	missense_variant	MODERATE	45	0	0.025	77	28	0.333	6.20789
Aplan-10C-3677-Thy_vs_Aplan-10C-3677-Tail	chr6	18220642	18220642	G	C	Cftr	c.511G>C	p.Val171Leu	missense_variant	MODERATE	147	0	0.009024	181	56	0.297	5.87998
Aplan-10C-3677-Thy_vs_Aplan-10C-3677-Tail	chr6	30519613	30519613	C	G	Ssmem1	c.440C>G	p.Thr147Ser	missense_variant	MODERATE	90	1	0.026	119	36	0.317	6.12604
Aplan-10C-3677-Thy_vs_Aplan-10C-3677-Tail	chr6	34306620	34306620	G	C	Akr1b3	c.828C>G	p.Val276Val	splice_region_variant&synonymous_variant	LOW	78	0	0.015	129	33	0.255	6.02081
Aplan-10C-3677-Thy_vs_Aplan-10C-3677-Tail	chr6	39805407	39805407	G	C	Mrps33	c.179C>G	p.Ala60Gly	missense_variant	MODERATE	67	1	0.036	79	29	0.369	6.1705
Aplan-10C-3677-Thy_vs_Aplan-10C-3677-Tail	chr6	40364276	40364276	C	G	Agk	c.299C>G	p.Thr100Arg	missense_variant&splice_region_variant	MODERATE	199	0	0.006476	275	65	0.231	5.87033
Aplan-10C-3677-Thy_vs_Aplan-10C-3677-Tail	chr6	42249905	42249905	C	G	Gstk1	c.604C>G	p.Arg202Gly	missense_variant	MODERATE	188	1	0.011	228	60	0.274	5.86635
Aplan-10C-3677-Thy_vs_Aplan-10C-3677-Tail	chr6	42594086	42594086	C	G	Tcaf3	c.731G>C	p.Arg244Pro	missense_variant	MODERATE	69	0	0.015	107	25	0.28	5.66755
Aplan-10C-3677-Thy_vs_Aplan-10C-3677-Tail	chr6	47021758	47021758	C	G	Cntnap2	c.2743C>G	p.Arg915Gly	missense_variant	MODERATE	52	0	0.022	60	13	0.22	3.76761
Aplan-10C-3677-Thy_vs_Aplan-10C-3677-Tail	chr6	48025008	48025008	G	C	Zfp777	c.2279C>G	p.Pro760Arg	missense_variant	MODERATE	23	0	0.045	32	11	0.276	2.85524
Aplan-10C-3677-Thy_vs_Aplan-10C-3677-Tail	chr6	48765862	48765862	G	C	Gimap3	c.133C>G	p.Arg45Gly	missense_variant	MODERATE	78	0	0.014	157	45	0.27	6.08167
Aplan-10C-3677-Thy_vs_Aplan-10C-3677-Tail	chr6	48905567	48905567	C	G	Aoc1	c.376C>G	p.Arg126Gly	missense_variant	MODERATE	97	0	0.011	148	51	0.333	6.1557
Aplan-10C-3677-Thy_vs_Aplan-10C-3677-Tail	chr6	51451077	51451077	G	C	Nfe2l3	c.618G>C	p.Thr206Thr	synonymous_variant	LOW	54	0	0.022	75	20	0.295	5.11518
Aplan-10C-3677-Thy_vs_Aplan-10C-3677-Tail	chr6	52170243	52170243	G	C	Hoxa3	c.1029C>G	p.Tyr343*	stop_gained	HIGH	34	0	0.03	44	12	0.28	3.10343
Aplan-10C-3677-Thy_vs_Aplan-10C-3677-Tail	chr6	52206605	52206605	G	C	Hoxa6	c.459C>G	p.His153Gln	missense_variant	MODERATE	43	0	0.028	63	15	0.227	3.51371
Aplan-10C-3677-Thy_vs_Aplan-10C-3677-Tail	chr6	52208328	52208328	G	C	Hoxa6	c.297C>G	p.Pro99Pro	synonymous_variant	LOW	48	0	0.023	61	10	0.2	2.64425
Aplan-10C-3677-Thy_vs_Aplan-10C-3677-Tail	chr6	52245521	52245521	C	G	Hoxa11	c.199G>C	p.Ala67Pro	missense_variant	MODERATE	30	0	0.034	32	12	0.364	3.83993
Aplan-10C-3677-Thy_vs_Aplan-10C-3677-Tail	chr6	66539834	66539834	C	G	Mad2l1	c.509C>G	p.Ser170Trp	missense_variant	MODERATE	131	0	0.009276	152	52	0.347	5.98841
Aplan-10C-3677-Thy_vs_Aplan-10C-3677-Tail	chr6	72568892	72568892	G	C	Elmod3	c.866C>G	p.Ala289Gly	missense_variant	MODERATE	49	1	0.025	49	13	0.269	3.08085
Aplan-10C-3677-Thy_vs_Aplan-10C-3677-Tail	chr6	73075705	73075705	G	C	Dnah6	c.8991C>G	p.Cys2997Trp	missense_variant	MODERATE	81	0	0.015	95	27	0.284	6.00772
Aplan-10C-3677-Thy_vs_Aplan-10C-3677-Tail	chr6	83032319	83032319	G	C	Dok1	c.551C>G	p.Thr184Ser	missense_variant	MODERATE	41	0	0.026	60	16	0.263	3.86967
Aplan-10C-3677-Thy_vs_Aplan-10C-3677-Tail	chr6	83147658	83147658	G	C	Rtkn	c.380G>C	p.Arg127Pro	missense_variant	MODERATE	84	0	0.014	92	22	0.263	6.1507
Aplan-10C-3677-Thy_vs_Aplan-10C-3677-Tail	chr6	83385985	83385985	C	G	Tet3	c.2204G>C	p.Arg735Pro	missense_variant&splice_region_variant	MODERATE	77	0	0.016	91	34	0.398	6.28354
Aplan-10C-3677-Thy_vs_Aplan-10C-3677-Tail	chr6	84116066	84116066	G	C	Dysf	c.3253G>C	p.Glu1085Gln	missense_variant	MODERATE	26	0	0.042	28	5	0.261	1.28503
Aplan-10C-3677-Thy_vs_Aplan-10C-3677-Tail	chr6	86946170	86946170	G	C	Aak1	c.723G>C	p.Thr241Thr	synonymous_variant	LOW	117	0	0.011	132	27	0.217	6.34376
Aplan-10C-3677-Thy_vs_Aplan-10C-3677-Tail	chr6	87933397	87933397	C	T	Hmces	c.788C>T	p.Pro263Leu	missense_variant	MODERATE	51	1	0.05	91	34	0.382	5.9468
Aplan-10C-3677-Thy_vs_Aplan-10C-3677-Tail	chr6	87936132	87936132	C	G	Hmces	c.868C>G	p.Leu290Val	missense_variant	MODERATE	74	0	0.016	85	34	0.396	6.38984
Aplan-10C-3677-Thy_vs_Aplan-10C-3677-Tail	chr6	90179364	90179364	C	G	Vmn1r52	c.649C>G	p.Arg217Gly	missense_variant	MODERATE	245	0	0.004425	341	81	0.25	5.81844
Aplan-10C-3677-Thy_vs_Aplan-10C-3677-Tail	chr6	90474266	90474266	G	C	Klf15	c.1226G>C	p.Arg409Pro	missense_variant	MODERATE	24	0	0.045	36	7	0.241	1.45523
Aplan-10C-3677-Thy_vs_Aplan-10C-3677-Tail	chr6	90474275	90474275	G	C	Klf15	c.1235G>C	p.Arg412Pro	missense_variant	MODERATE	22	0	0.048	36	7	0.234	1.42871
Aplan-10C-3677-Thy_vs_Aplan-10C-3677-Tail	chr6	91165599	91165599	G	C	Hdac11	c.291G>C	p.Pro97Pro	synonymous_variant	LOW	49	0	0.025	58	17	0.289	4.76553
Aplan-10C-3677-Thy_vs_Aplan-10C-3677-Tail	chr6	91365885	91365885	C	G	Wnt7a	c.1014G>C	p.Thr338Thr	synonymous_variant	LOW	39	0	0.032	43	16	0.415	5.13924
Aplan-10C-3677-Thy_vs_Aplan-10C-3677-Tail	chr6	104569057	104569057	C	G	Cntn6	c.19C>G	p.Leu7Val	missense_variant	MODERATE	165	0	0.007741	166	43	0.254	5.93982
Aplan-10C-3677-Thy_vs_Aplan-10C-3677-Tail	chr6	108416908	108416908	C	G	Itpr1	c.4911C>G	p.Pro1637Pro	synonymous_variant	LOW	46	0	0.026	55	17	0.286	4.8076
Aplan-10C-3677-Thy_vs_Aplan-10C-3677-Tail	chr6	108440655	108440655	G	C	Itpr1	c.5485G>C	p.Ala1829Pro	missense_variant	MODERATE	47	0	0.026	48	11	0.261	3.29037
Aplan-10C-3677-Thy_vs_Aplan-10C-3677-Tail	chr6	112472329	112472329	G	C	Cav3	c.307G>C	p.Val103Leu	missense_variant	MODERATE	61	0	0.021	67	22	0.321	6.43109
Aplan-10C-3677-Thy_vs_Aplan-10C-3677-Tail	chr6	113408960	113408960	C	G	Ttll3	c.1753C>G	p.Arg585Gly	missense_variant	MODERATE	41	0	0.028	54	14	0.306	3.68392
Aplan-10C-3677-Thy_vs_Aplan-10C-3677-Tail	chr6	115472993	115472993	G	C	Pparg	c.952G>C	p.Val318Leu	missense_variant	MODERATE	118	0	0.01	140	33	0.24	5.96184
Aplan-10C-3677-Thy_vs_Aplan-10C-3677-Tail	chr6	115915962	115915962	G	C	Ift122	c.2529G>C	p.Thr843Thr	synonymous_variant	LOW	23	0	0.047	40	11	0.258	2.31284
Aplan-10C-3677-Thy_vs_Aplan-10C-3677-Tail	chr6	115932269	115932269	G	A	Rho	c.265G>A	p.Gly89Arg	missense_variant	MODERATE	43	0	0.025	53	19	0.381	5.5673
Aplan-10C-3677-Thy_vs_Aplan-10C-3677-Tail	chr6	116288057	116288057	C	G	Zfand4	c.482C>G	p.Ser161Cys	missense_variant	MODERATE	42	0	0.025	65	24	0.396	5.81347
Aplan-10C-3677-Thy_vs_Aplan-10C-3677-Tail	chr6	118180242	118180242	C	G	Ret	c.846G>C	p.Ala282Ala	synonymous_variant	LOW	88	0	0.014	110	42	0.367	5.96522
Aplan-10C-3677-Thy_vs_Aplan-10C-3677-Tail	chr6	119433516	119433516	C	G	Wnt5b	c.962G>C	p.Arg321Pro	missense_variant	MODERATE	45	0	0.025	54	18	0.348	5.20122
Aplan-10C-3677-Thy_vs_Aplan-10C-3677-Tail	chr6	119440545	119440545	C	G	Wnt5b	c.358G>C	p.Val120Leu	missense_variant	MODERATE	28	0	0.039	50	19	0.393	4.22863
Aplan-10C-3677-Thy_vs_Aplan-10C-3677-Tail	chr6	120206544	120206544	G	A	B4galnt3	c.2787C>T	p.Ile929Ile	synonymous_variant	LOW	46	0	0.027	94	30	0.303	5.88127
Aplan-10C-3677-Thy_vs_Aplan-10C-3677-Tail	chr6	120406659	120406659	C	G	Kdm5a	c.2360C>G	p.Ala787Gly	missense_variant	MODERATE	66	0	0.019	90	22	0.263	5.67553
Aplan-10C-3677-Thy_vs_Aplan-10C-3677-Tail	chr6	120427766	120427766	G	C	Kdm5a	c.3968G>C	p.Arg1323Pro	missense_variant	MODERATE	158	0	0.007472	278	79	0.288	5.94729
Aplan-10C-3677-Thy_vs_Aplan-10C-3677-Tail	chr6	120959567	120959567	G	A	Mical3	c.3997C>T	p.Arg1333Cys	missense_variant	MODERATE	64	0	0.016	80	24	0.307	6.49465
Aplan-10C-3677-Thy_vs_Aplan-10C-3677-Tail	chr6	124318856	124318856	C	T	Cd163	c.2158C>T	p.Arg720Cys	missense_variant	MODERATE	51	0	0.019	109	35	0.323	6.23198
Aplan-10C-3677-Thy_vs_Aplan-10C-3677-Tail	chr6	124533912	124533912	G	C	C1s1	c.1068C>G	p.Ser356Ser	synonymous_variant	LOW	32	0	0.032	62	16	0.262	3.04541
Aplan-10C-3677-Thy_vs_Aplan-10C-3677-Tail	chr6	124625771	124625771	C	G	C1s2	c.1480G>C	p.Gly494Arg	missense_variant	MODERATE	64	0	0.018	86	31	0.377	6.59982
Aplan-10C-3677-Thy_vs_Aplan-10C-3677-Tail	chr6	125281205	125281205	G	C	Tuba3a	c.821C>G	p.Pro274Arg	missense_variant	MODERATE	133	0	0.008965	188	48	0.26	6.07131
Aplan-10C-3677-Thy_vs_Aplan-10C-3677-Tail	chr6	125677947	125677947	C	G	Vwf	c.7605C>G	p.Arg2535Arg	synonymous_variant	LOW	30	0	0.034	34	14	0.393	4.49315
Aplan-10C-3677-Thy_vs_Aplan-10C-3677-Tail	chr6	125793600	125793600	C	G	Ano2	c.829C>G	p.Arg277Gly	missense_variant	MODERATE	45	0	0.029	57	25	0.424	5.95305
Aplan-10C-3677-Thy_vs_Aplan-10C-3677-Tail	chr6	126844403	126844403	G	C	Ndufa9	c.223C>G	p.Arg75Gly	missense_variant&splice_region_variant	MODERATE	77	0	0.015	92	21	0.264	5.88525
Aplan-10C-3677-Thy_vs_Aplan-10C-3677-Tail	chr6	126864538	126864538	G	C	Akap3	c.119G>C	p.Arg40Pro	missense_variant	MODERATE	48	0	0.022	95	38	0.386	6.31879
Aplan-10C-3677-Thy_vs_Aplan-10C-3677-Tail	chr6	128820297	128820297	G	C	Klrb1b	c.227C>G	p.Ala76Gly	missense_variant	MODERATE	170	0	0.007447	215	72	0.338	5.7817
Aplan-10C-3677-Thy_vs_Aplan-10C-3677-Tail	chr6	128893653	128893653	C	A	Clec2i	c.228C>A	p.Ser76Ser	synonymous_variant	LOW	138	0	0.008922	198	67	0.337	6.15748
Aplan-10C-3677-Thy_vs_Aplan-10C-3677-Tail	chr6	129582431	129582431	G	C	Klre1	c.322+1G>C		splice_donor_variant&intron_variant	HIGH	148	0	0.009178	184	46	0.264	6.10565
Aplan-10C-3677-Thy_vs_Aplan-10C-3677-Tail	chr6	134720539	134720539	G	C	Dusp16	c.770C>G	p.Ala257Gly	missense_variant	MODERATE	97	0	0.013	85	23	0.282	6.56127
Aplan-10C-3677-Thy_vs_Aplan-10C-3677-Tail	chr6	142570091	142570091	C	G	Kcnj8	c.289G>C	p.Ala97Pro	missense_variant	MODERATE	56	0	0.02	83	27	0.357	6.59607
Aplan-10C-3677-Thy_vs_Aplan-10C-3677-Tail	chr6	146325151	146325151	C	G	Itpr2	c.4094G>C	p.Arg1365Pro	missense_variant	MODERATE	74	0	0.015	77	26	0.323	6.25699
Aplan-10C-3677-Thy_vs_Aplan-10C-3677-Tail	chr7	3620768	3620768	G	C	Tfpt	c.639C>G	p.Ala213Ala	synonymous_variant	LOW	27	0	0.036	26	9	0.357	3.15177
Aplan-10C-3677-Thy_vs_Aplan-10C-3677-Tail	chr7	4522076	4522076	G	C	Tnni3	c.18C>G	p.Ser6Arg	missense_variant	MODERATE	57	0	0.019	89	34	0.405	6.25288
Aplan-10C-3677-Thy_vs_Aplan-10C-3677-Tail	chr7	4707423	4707423	G	C	Brsk1	c.1655G>C	p.Arg552Pro	missense_variant	MODERATE	34	0	0.032	30	8	0.241	2.87865
Aplan-10C-3677-Thy_vs_Aplan-10C-3677-Tail	chr7	4776222	4776222	G	C	Il11	c.181-6C>G		splice_region_variant&intron_variant	LOW	83	1	0.029	78	25	0.333	6.27616
Aplan-10C-3677-Thy_vs_Aplan-10C-3677-Tail	chr7	4936760	4936760	G	C	Ssc5d	c.2194G>C	p.Glu732Gln	missense_variant	MODERATE	39	0	0.027	43	12	0.325	3.63387
Aplan-10C-3677-Thy_vs_Aplan-10C-3677-Tail	chr7	4944586	4944586	G	C	Ssc5d	c.3938G>C	p.Arg1313Pro	missense_variant	MODERATE	40	0	0.026	72	35	0.478	6.51736
Aplan-10C-3677-Thy_vs_Aplan-10C-3677-Tail	chr7	5196330	5196330	G	C	Vmn1r56	c.287C>G	p.Ser96Cys	missense_variant	MODERATE	314	0	0.003824	435	159	0.369	5.64324
Aplan-10C-3677-Thy_vs_Aplan-10C-3677-Tail	chr7	12844545	12844545	C	G	Zfp110	c.382C>G	p.Arg128Gly	missense_variant	MODERATE	177	0	0.007122	219	48	0.232	6.14903
Aplan-10C-3677-Thy_vs_Aplan-10C-3677-Tail	chr7	12971335	12971335	G	C	Zfp324	c.1450G>C	p.Glu484Gln	missense_variant	MODERATE	32	0	0.037	51	12	0.224	2.59198
Aplan-10C-3677-Thy_vs_Aplan-10C-3677-Tail	chr7	12971470	12971470	G	C	Zfp324	c.1585G>C	p.Ala529Pro	missense_variant	MODERATE	23	0	0.044	34	8	0.25	1.78705
Aplan-10C-3677-Thy_vs_Aplan-10C-3677-Tail	chr7	13007559	13007559	C	G	Zbtb45	c.771G>C	p.Glu257Asp	missense_variant	MODERATE	35	0	0.034	51	9	0.208	2.02782
Aplan-10C-3677-Thy_vs_Aplan-10C-3677-Tail	chr7	13007928	13007928	C	G	Zbtb45	c.402G>C	p.Ala134Ala	synonymous_variant	LOW	14	0	0.07	19	4	0.237	0.923783
Aplan-10C-3677-Thy_vs_Aplan-10C-3677-Tail	chr7	15555570	15555570	C	T	Obox1	c.283C>T	p.Arg95*	stop_gained	HIGH	138	0	0.008407	229	72	0.314	5.83929
Aplan-10C-3677-Thy_vs_Aplan-10C-3677-Tail	chr7	15972104	15972104	C	G	Gltscr1	c.4411G>C	p.Ala1471Pro	missense_variant	MODERATE	49	0	0.024	57	21	0.373	6.32328
Aplan-10C-3677-Thy_vs_Aplan-10C-3677-Tail	chr7	15972248	15972248	G	C	Gltscr1	c.4267C>G	p.Arg1423Gly	missense_variant	MODERATE	42	0	0.029	43	11	0.285	3.32768
Aplan-10C-3677-Thy_vs_Aplan-10C-3677-Tail	chr7	16140888	16140888	C	G	Slc8a2	c.1060C>G	p.Arg354Gly	missense_variant	MODERATE	20	0	0.053	49	24	0.488	4.37448
Aplan-10C-3677-Thy_vs_Aplan-10C-3677-Tail	chr7	16561640	16561640	G	C	Arhgap35	c.3499C>G	p.Arg1167Gly	missense_variant	MODERATE	78	0	0.013	122	27	0.225	6.21135
Aplan-10C-3677-Thy_vs_Aplan-10C-3677-Tail	chr7	16811030	16811030	G	C	Fkrp	c.906C>G	p.Gly302Gly	synonymous_variant	LOW	18	0	0.061	17	8	0.4	2.98594
Aplan-10C-3677-Thy_vs_Aplan-10C-3677-Tail	chr7	16811598	16811598	G	C	Fkrp	c.338C>G	p.Ala113Gly	missense_variant	MODERATE	23	0	0.042	30	7	0.25	1.82981
Aplan-10C-3677-Thy_vs_Aplan-10C-3677-Tail	chr7	16865881	16865881	G	C	Prkd2	c.2268G>C	p.Glu756Asp	missense_variant	MODERATE	53	1	0.023	72	27	0.367	5.723
Aplan-10C-3677-Thy_vs_Aplan-10C-3677-Tail	chr7	17093838	17093838	G	C	Psg16	c.445G>C	p.Gly149Arg	missense_variant	MODERATE	229	0	0.00519	296	105	0.367	5.77221
Aplan-10C-3677-Thy_vs_Aplan-10C-3677-Tail	chr7	18950521	18950521	G	C	Nova2	c.298G>C	p.Ala100Pro	missense_variant	MODERATE	50	0	0.024	83	27	0.364	6.17941
Aplan-10C-3677-Thy_vs_Aplan-10C-3677-Tail	chr7	19081027	19081027	G	C	Dmwd	c.1601G>C	p.Arg534Pro	missense_variant	MODERATE	46	0	0.023	55	17	0.361	4.8076
Aplan-10C-3677-Thy_vs_Aplan-10C-3677-Tail	chr7	19096991	19096991	G	C	Six5	c.1542G>C	p.Ala514Ala	synonymous_variant	LOW	45	0	0.025	61	17	0.304	4.52907
Aplan-10C-3677-Thy_vs_Aplan-10C-3677-Tail	chr7	19147017	19147017	G	C	Qpctl	c.489C>G	p.His163Gln	missense_variant	MODERATE	31	0	0.038	34	15	0.436	4.983
Aplan-10C-3677-Thy_vs_Aplan-10C-3677-Tail	chr7	19196518	19196518	G	C	Eml2	c.1079G>C	p.Arg360Pro	missense_variant	MODERATE	37	0	0.032	69	28	0.383	6.01784
Aplan-10C-3677-Thy_vs_Aplan-10C-3677-Tail	chr7	19426332	19426332	G	C	Mark4	c.2002C>G	p.Arg668Gly	missense_variant	MODERATE	17	0	0.075	10	7	0.625	3.86925
Aplan-10C-3677-Thy_vs_Aplan-10C-3677-Tail	chr7	19586405	19586405	C	T	Clasrp	c.1327G>A	p.Asp443Asn	missense_variant	MODERATE	15	0	0.067	20	7	0.369	1.90361
Aplan-10C-3677-Thy_vs_Aplan-10C-3677-Tail	chr7	19697636	19697636	C	G	Apoe	c.55G>C	p.Glu19Gln	missense_variant	MODERATE	41	0	0.032	49	14	0.324	4.10454
Aplan-10C-3677-Thy_vs_Aplan-10C-3677-Tail	chr7	24384029	24384029	C	G	Kcnn4	c.1134C>G	p.Asp378Glu	missense_variant	MODERATE	26	0	0.042	38	15	0.372	3.83812
Aplan-10C-3677-Thy_vs_Aplan-10C-3677-Tail	chr7	24640130	24640130	G	C	Lypd3	c.621G>C	p.Thr207Thr	synonymous_variant	LOW	50	0	0.025	62	18	0.259	5.0587
Aplan-10C-3677-Thy_vs_Aplan-10C-3677-Tail	chr7	25302888	25302888	C	G	Prr19	c.10C>G	p.Arg4Gly	missense_variant	MODERATE	89	0	0.014	107	33	0.306	6.26486
Aplan-10C-3677-Thy_vs_Aplan-10C-3677-Tail	chr7	25342727	25342727	G	C	Megf8	c.3969G>C	p.Pro1323Pro	synonymous_variant	LOW	38	0	0.031	52	14	0.244	3.64219
Aplan-10C-3677-Thy_vs_Aplan-10C-3677-Tail	chr7	25692431	25692431	C	G	Tgfb1	c.410C>G	p.Thr137Arg	missense_variant	MODERATE	52	0	0.023	98	39	0.403	6.45516
Aplan-10C-3677-Thy_vs_Aplan-10C-3677-Tail	chr7	27180939	27180939	G	C	Mia	c.107C>G	p.Ala36Gly	missense_variant	MODERATE	85	0	0.014	110	47	0.448	5.88149
Aplan-10C-3677-Thy_vs_Aplan-10C-3677-Tail	chr7	27517767	27517767	G	C	Prx	c.2109G>C	p.Ser703Ser	synonymous_variant	LOW	70	0	0.015	123	51	0.415	6.40952
Aplan-10C-3677-Thy_vs_Aplan-10C-3677-Tail	chr7	28139963	28139963	G	C	9530053A07Rik	c.1200G>C	p.Ala400Ala	synonymous_variant	LOW	48	0	0.023	58	22	0.382	5.94897
Aplan-10C-3677-Thy_vs_Aplan-10C-3677-Tail	chr7	28407299	28407299	G	C	Samd4b	c.1036C>G	p.Arg346Gly	missense_variant	MODERATE	85	0	0.015	94	33	0.353	6.34649
Aplan-10C-3677-Thy_vs_Aplan-10C-3677-Tail	chr7	28794982	28794982	G	C	Rinl	c.394G>C	p.Val132Leu	missense_variant	MODERATE	63	0	0.019	102	40	0.387	5.83012
Aplan-10C-3677-Thy_vs_Aplan-10C-3677-Tail	chr7	29094050	29094050	G	C	Ryr1	c.3992C>G	p.Thr1331Arg	missense_variant	MODERATE	22	0	0.045	41	14	0.38	2.93613
Aplan-10C-3677-Thy_vs_Aplan-10C-3677-Tail	chr7	29104555	29104555	G	C	Ryr1	c.1786C>G	p.Arg596Gly	missense_variant	MODERATE	87	0	0.014	142	44	0.328	6.27544
Aplan-10C-3677-Thy_vs_Aplan-10C-3677-Tail	chr7	29161600	29161600	G	C	Spred3	c.1153C>G	p.Arg385Gly	missense_variant	MODERATE	59	0	0.021	72	25	0.367	5.95971
Aplan-10C-3677-Thy_vs_Aplan-10C-3677-Tail	chr7	29161706	29161706	C	G	Spred3	c.1047G>C	p.Ser349Ser	synonymous_variant	LOW	40	0	0.025	62	24	0.363	5.88321
Aplan-10C-3677-Thy_vs_Aplan-10C-3677-Tail	chr7	29348445	29348445	G	C	Sipa1l3	c.4017C>G	p.Gly1339Gly	synonymous_variant	LOW	34	0	0.032	28	10	0.4	3.91345
Aplan-10C-3677-Thy_vs_Aplan-10C-3677-Tail	chr7	29383297	29383297	G	C	Sipa1l3	c.2172C>G	p.Pro724Pro	synonymous_variant	LOW	37	0	0.03	39	9	0.252	2.62696
Aplan-10C-3677-Thy_vs_Aplan-10C-3677-Tail	chr7	30297364	30297364	C	G	Clip3	c.410C>G	p.Ala137Gly	missense_variant	MODERATE	64	0	0.019	73	19	0.274	5.71926
Aplan-10C-3677-Thy_vs_Aplan-10C-3677-Tail	chr7	30359597	30359597	C	G	Lrfn3	c.1202G>C	p.Arg401Pro	missense_variant	MODERATE	16	0	0.067	21	9	0.476	2.33468
Aplan-10C-3677-Thy_vs_Aplan-10C-3677-Tail	chr7	30442900	30442900	G	C	Aplp1	c.435C>G	p.Phe145Leu	missense_variant	MODERATE	52	0	0.024	80	32	0.424	6.27022
Aplan-10C-3677-Thy_vs_Aplan-10C-3677-Tail	chr7	30585775	30585775	G	C	Kmt2b	c.1691C>G	p.Pro564Arg	missense_variant	MODERATE	23	0	0.043	72	22	0.306	2.89402
Aplan-10C-3677-Thy_vs_Aplan-10C-3677-Tail	chr7	30609614	30609614	C	G	Upk1a	c.282G>C	p.Thr94Thr	splice_region_variant&synonymous_variant	LOW	20	0	0.056	24	9	0.356	2.68168
Aplan-10C-3677-Thy_vs_Aplan-10C-3677-Tail	chr7	30911914	30911914	G	C	Mag	c.23C>G	p.Pro8Arg	missense_variant	MODERATE	23	0	0.048	25	9	0.359	2.76817
Aplan-10C-3677-Thy_vs_Aplan-10C-3677-Tail	chr7	44509037	44509037	C	G	Mybpc2	c.2120G>C	p.Arg707Pro	missense_variant	MODERATE	54	0	0.024	56	12	0.235	3.5913
Aplan-10C-3677-Thy_vs_Aplan-10C-3677-Tail	chr7	44595609	44595609	C	G	Kcnc3	c.1322C>G	p.Thr441Arg	missense_variant	MODERATE	74	0	0.016	90	31	0.349	6.32566
Aplan-10C-3677-Thy_vs_Aplan-10C-3677-Tail	chr7	44879469	44879469	G	C	Med25	c.2186C>G	p.Pro729Arg	missense_variant	MODERATE	44	0	0.031	49	15	0.357	4.63614
Aplan-10C-3677-Thy_vs_Aplan-10C-3677-Tail	chr7	44880964	44880964	G	C	Med25	c.1630C>G	p.His544Asp	missense_variant	MODERATE	59	0	0.02	59	15	0.268	4.65645
Aplan-10C-3677-Thy_vs_Aplan-10C-3677-Tail	chr7	44881001	44881001	G	C	Med25	c.1593C>G	p.Ser531Arg	missense_variant	MODERATE	62	0	0.02	81	21	0.261	5.43168
Aplan-10C-3677-Thy_vs_Aplan-10C-3677-Tail	chr7	44881110	44881110	G	C	Med25	c.1484C>G	p.Ala495Gly	missense_variant&splice_region_variant	MODERATE	54	0	0.022	69	20	0.274	5.59323
Aplan-10C-3677-Thy_vs_Aplan-10C-3677-Tail	chr7	44906071	44906071	G	C	Ap2a1	c.1272C>G	p.Ile424Met	missense_variant&splice_region_variant	MODERATE	41	0	0.026	72	28	0.405	6.34726
Aplan-10C-3677-Thy_vs_Aplan-10C-3677-Tail	chr7	44916205	44916205	G	C	Ap2a1	c.237C>G	p.Ala79Ala	synonymous_variant	LOW	46	0	0.022	82	35	0.444	6.15072
Aplan-10C-3677-Thy_vs_Aplan-10C-3677-Tail	chr7	45006968	45006968	C	G	Scaf1	c.2486G>C	p.Arg829Pro	missense_variant	MODERATE	45	0	0.026	62	24	0.354	6.30587
Aplan-10C-3677-Thy_vs_Aplan-10C-3677-Tail	chr7	45049338	45049338	G	C	Prr12	c.1152C>G	p.Pro384Pro	synonymous_variant	LOW	35	0	0.029	27	10	0.36	4.10533
Aplan-10C-3677-Thy_vs_Aplan-10C-3677-Tail	chr7	45049344	45049344	C	A	Prr12	c.1146G>T	p.Gln382His	missense_variant	MODERATE	35	0	0.03	24	4	0.216	1.63176
Aplan-10C-3677-Thy_vs_Aplan-10C-3677-Tail	chr7	45232277	45232277	G	C	Tead2	c.1166G>C	p.Arg389Pro	missense_variant	MODERATE	53	0	0.024	59	16	0.275	4.8831
Aplan-10C-3677-Thy_vs_Aplan-10C-3677-Tail	chr7	45422803	45422803	G	C	Ruvbl2	c.1006C>G	p.Arg336Gly	missense_variant	MODERATE	49	0	0.023	63	18	0.287	4.97422
Aplan-10C-3677-Thy_vs_Aplan-10C-3677-Tail	chr7	45458202	45458202	G	T	Ftl1	c.457C>A	p.Arg153Ser	missense_variant	MODERATE	59	0	0.021	93	41	0.429	6.33819
Aplan-10C-3677-Thy_vs_Aplan-10C-3677-Tail	chr7	45488155	45488155	G	C	Dhdh	c.107C>G	p.Ala36Gly	missense_variant	MODERATE	35	0	0.038	32	10	0.334	3.5848
Aplan-10C-3677-Thy_vs_Aplan-10C-3677-Tail	chr7	45585221	45585221	C	G	Bcat2	c.525C>G	p.Ile175Met	missense_variant	MODERATE	57	0	0.02	69	27	0.407	6.44919
Aplan-10C-3677-Thy_vs_Aplan-10C-3677-Tail	chr7	45694246	45694246	G	C	Ntn5	c.1215G>C	p.Ala405Ala	synonymous_variant	LOW	24	0	0.048	36	18	0.467	4.69
Aplan-10C-3677-Thy_vs_Aplan-10C-3677-Tail	chr7	45712132	45712132	G	C	Sphk2	c.693C>G	p.Ala231Ala	synonymous_variant	LOW	84	0	0.013	87	25	0.288	6.51999
Aplan-10C-3677-Thy_vs_Aplan-10C-3677-Tail	chr7	45712271	45712271	C	G	Sphk2	c.637G>C	p.Gly213Arg	missense_variant	MODERATE	82	0	0.014	102	32	0.322	6.08951
Aplan-10C-3677-Thy_vs_Aplan-10C-3677-Tail	chr7	45713386	45713386	G	C	Sphk2	c.280C>G	p.Arg94Gly	missense_variant	MODERATE	17	0	0.059	24	5	0.24	1.18725
Aplan-10C-3677-Thy_vs_Aplan-10C-3677-Tail	chr7	45722246	45722246	G	C	Fam83e	c.66G>C	p.Thr22Thr	synonymous_variant	LOW	18	1	0.059	15	4	0.202	0.817363
Aplan-10C-3677-Thy_vs_Aplan-10C-3677-Tail	chr7	45794633	45794633	G	C	Lmtk3	c.2661G>C	p.Ala887Ala	synonymous_variant	LOW	44	0	0.025	47	11	0.256	3.27565
Aplan-10C-3677-Thy_vs_Aplan-10C-3677-Tail	chr7	45819752	45819752	C	G	Kcnj14	c.328G>C	p.Ala110Pro	missense_variant	MODERATE	28	0	0.038	34	9	0.268	2.53373
Aplan-10C-3677-Thy_vs_Aplan-10C-3677-Tail	chr7	45862417	45862417	G	C	Grin2d	c.603C>G	p.Ile201Met	missense_variant	MODERATE	20	0	0.05	32	12	0.393	2.80555
Aplan-10C-3677-Thy_vs_Aplan-10C-3677-Tail	chr7	45977364	45977364	G	C	Abcc6	c.4268C>G	p.Ala1423Gly	missense_variant	MODERATE	14	0	0.083	23	11	0.5	2.65735
Aplan-10C-3677-Thy_vs_Aplan-10C-3677-Tail	chr7	46045349	46045349	G	C	Nomo1	c.647G>C	p.Arg216Pro	missense_variant	MODERATE	71	0	0.019	57	19	0.26	5.98609
Aplan-10C-3677-Thy_vs_Aplan-10C-3677-Tail	chr7	46108114	46108114	G	C	Abcc8	c.4110C>G	p.His1370Gln	missense_variant	MODERATE	34	0	0.031	37	17	0.424	5.75428
Aplan-10C-3677-Thy_vs_Aplan-10C-3677-Tail	chr7	46169826	46169826	G	C	Abcc8	c.577C>G	p.Arg193Gly	missense_variant&splice_region_variant	MODERATE	42	0	0.033	64	15	0.225	3.4805
Aplan-10C-3677-Thy_vs_Aplan-10C-3677-Tail	chr7	46701782	46701782	G	C	Saal1	c.769C>G	p.Arg257Gly	missense_variant&splice_region_variant	MODERATE	89	0	0.014	92	41	0.425	6.10455
Aplan-10C-3677-Thy_vs_Aplan-10C-3677-Tail	chr7	46774810	46774810	C	G	Hps5	c.1634+4G>C		splice_region_variant&intron_variant	LOW	66	0	0.018	87	18	0.214	4.73388
Aplan-10C-3677-Thy_vs_Aplan-10C-3677-Tail	chr7	49420214	49420214	G	C	Nav2	c.817G>C	p.Glu273Gln	missense_variant	MODERATE	36	0	0.03	53	18	0.341	4.60575
Aplan-10C-3677-Thy_vs_Aplan-10C-3677-Tail	chr7	49535922	49535922	G	C	Nav2	c.2812G>C	p.Gly938Arg	missense_variant	MODERATE	20	0	0.048	33	8	0.283	1.72831
Aplan-10C-3677-Thy_vs_Aplan-10C-3677-Tail	chr7	50249713	50249713	G	C	Nell1	c.1070G>C	p.Arg357Pro	missense_variant&splice_region_variant	MODERATE	103	0	0.012	106	41	0.384	5.89293
Aplan-10C-3677-Thy_vs_Aplan-10C-3677-Tail	chr7	55896741	55896741	C	G	Cyfip1	c.1600C>G	p.Arg534Gly	missense_variant	MODERATE	42	0	0.029	57	18	0.302	4.6289
Aplan-10C-3677-Thy_vs_Aplan-10C-3677-Tail	chr7	56121638	56121638	G	C	Herc2	c.3147G>C	p.Ser1049Ser	synonymous_variant	LOW	65	0	0.018	69	21	0.302	5.88354
Aplan-10C-3677-Thy_vs_Aplan-10C-3677-Tail	chr7	59276672	59276672	G	C	Ube3a	c.1260G>C	p.Val420Val	synonymous_variant	LOW	89	0	0.013	148	54	0.378	6.0259
Aplan-10C-3677-Thy_vs_Aplan-10C-3677-Tail	chr7	63729083	63729083	G	C	Otud7a	c.680G>C	p.Arg227Pro	missense_variant	MODERATE	58	0	0.023	59	24	0.405	6.5998
Aplan-10C-3677-Thy_vs_Aplan-10C-3677-Tail	chr7	64243506	64243506	G	C	Trpm1	c.3105G>C	p.Pro1035Pro	synonymous_variant	LOW	97	0	0.012	108	41	0.365	6.42073
Aplan-10C-3677-Thy_vs_Aplan-10C-3677-Tail	chr7	66708411	66708411	G	C	Lins1	c.293G>C	p.Arg98Pro	missense_variant	MODERATE	83	0	0.013	104	29	0.296	6.09832
Aplan-10C-3677-Thy_vs_Aplan-10C-3677-Tail	chr7	68184799	68184799	C	G	Igf1r	c.1534C>G	p.Arg512Gly	missense_variant	MODERATE	55	0	0.02	84	28	0.381	6.3604
Aplan-10C-3677-Thy_vs_Aplan-10C-3677-Tail	chr7	75865971	75865971	C	G	Klhl25	c.624C>G	p.Arg208Arg	synonymous_variant	LOW	23	0	0.043	58	11	0.215	1.54176
Aplan-10C-3677-Thy_vs_Aplan-10C-3677-Tail	chr7	79113769	79113769	G	C	Acan	c.6254G>C	p.Arg2085Pro	missense_variant	MODERATE	27	0	0.045	36	13	0.379	3.54908
Aplan-10C-3677-Thy_vs_Aplan-10C-3677-Tail	chr7	79435360	79435360	C	G	Fanci	c.2617C>G	p.Leu873Val	missense_variant	MODERATE	82	0	0.014	66	20	0.31	6.27113
Aplan-10C-3677-Thy_vs_Aplan-10C-3677-Tail	chr7	79464967	79464967	G	C	Polg	c.245C>G	p.Ala82Gly	missense_variant	MODERATE	20	0	0.053	19	4	0.21	1.32676
Aplan-10C-3677-Thy_vs_Aplan-10C-3677-Tail	chr7	79836374	79836374	C	G	Anpep	c.1599G>C	p.Pro533Pro	synonymous_variant	LOW	31	0	0.037	32	5	0.2	1.27717
Aplan-10C-3677-Thy_vs_Aplan-10C-3677-Tail	chr7	80238352	80238352	C	G	Gdpgp1	c.130C>G	p.Pro44Ala	missense_variant	MODERATE	47	0	0.024	88	16	0.21	2.91055
Aplan-10C-3677-Thy_vs_Aplan-10C-3677-Tail	chr7	80260506	80260506	C	G	Ttll13	c.2396C>G	p.Ser799Trp	missense_variant	MODERATE	71	0	0.016	106	24	0.244	5.74909
Aplan-10C-3677-Thy_vs_Aplan-10C-3677-Tail	chr7	80334789	80334789	C	G	Unc45a	c.762G>C	p.Ser254Ser	synonymous_variant	LOW	44	0	0.025	67	21	0.333	5.10521
Aplan-10C-3677-Thy_vs_Aplan-10C-3677-Tail	chr7	81038562	81038562	C	G	Zfp592	c.3034C>G	p.Arg1012Gly	missense_variant	MODERATE	74	0	0.016	97	43	0.431	6.12003
Aplan-10C-3677-Thy_vs_Aplan-10C-3677-Tail	chr7	81473479	81473479	G	C	Ap3b2	c.1286C>G	p.Thr429Arg	missense_variant	MODERATE	83	0	0.015	99	42	0.413	5.97473
Aplan-10C-3677-Thy_vs_Aplan-10C-3677-Tail	chr7	83952937	83952937	G	C	Cemip	c.2643C>G	p.Tyr881*	stop_gained	HIGH	31	0	0.034	24	12	0.484	5.21017
Aplan-10C-3677-Thy_vs_Aplan-10C-3677-Tail	chr7	89509852	89509852	G	C	Prss23	c.1008C>G	p.Ile336Met	missense_variant	MODERATE	81	0	0.013	87	30	0.338	6.5036
Aplan-10C-3677-Thy_vs_Aplan-10C-3677-Tail	chr7	89887751	89887751	C	G	Ccdc81	c.688G>C	p.Glu230Gln	missense_variant	MODERATE	200	0	0.005969	238	91	0.383	5.7692
Aplan-10C-3677-Thy_vs_Aplan-10C-3677-Tail	chr7	96737424	96737424	G	C	Tenm4	c.1736G>C	p.Arg579Pro	missense_variant	MODERATE	34	0	0.032	44	10	0.243	2.4078
Aplan-10C-3677-Thy_vs_Aplan-10C-3677-Tail	chr7	97417222	97417222	G	C	Thrsp	c.282C>G	p.Asn94Lys	missense_variant	MODERATE	53	0	0.021	109	43	0.39	6.00482
Aplan-10C-3677-Thy_vs_Aplan-10C-3677-Tail	chr7	97664750	97664750	C	G	Rsf1	c.2708C>G	p.Pro903Arg	missense_variant	MODERATE	50	0	0.025	69	28	0.375	5.85182
Aplan-10C-3677-Thy_vs_Aplan-10C-3677-Tail	chr7	98093533	98093533	G	C	Myo7a	c.1288C>G	p.Arg430Gly	missense_variant	MODERATE	31	0	0.037	45	16	0.385	4.06944
Aplan-10C-3677-Thy_vs_Aplan-10C-3677-Tail	chr7	98094719	98094719	G	C	Myo7a	c.1028C>G	p.Ala343Gly	missense_variant	MODERATE	16	0	0.063	18	7	0.389	2.09462
Aplan-10C-3677-Thy_vs_Aplan-10C-3677-Tail	chr7	100653696	100653696	G	C	Plekhb1	c.351-3C>G		splice_region_variant&intron_variant	LOW	34	0	0.03	48	11	0.238	2.68119
Aplan-10C-3677-Thy_vs_Aplan-10C-3677-Tail	chr7	100939049	100939049	C	G	P2ry6	c.102G>C	p.Ser34Ser	synonymous_variant	LOW	46	0	0.024	68	24	0.361	6.16891
Aplan-10C-3677-Thy_vs_Aplan-10C-3677-Tail	chr7	100998223	100998223	G	C	P2ry2	c.874C>G	p.Arg292Gly	missense_variant	MODERATE	56	0	0.02	72	22	0.329	5.88522
Aplan-10C-3677-Thy_vs_Aplan-10C-3677-Tail	chr7	101296208	101296208	G	C	Atg16l2	c.749C>G	p.Thr250Arg	missense_variant	MODERATE	84	0	0.015	124	45	0.4	6.15285
Aplan-10C-3677-Thy_vs_Aplan-10C-3677-Tail	chr7	101580449	101580449	G	C	Art2b	c.242C>G	p.Thr81Arg	missense_variant	MODERATE	159	0	0.007137	278	121	0.451	5.61173
Aplan-10C-3677-Thy_vs_Aplan-10C-3677-Tail	chr7	101910424	101910424	C	G	Lamtor1	c.271C>G	p.Arg91Gly	missense_variant	MODERATE	25	0	0.043	56	18	0.313	3.05458
Aplan-10C-3677-Thy_vs_Aplan-10C-3677-Tail	chr7	102129839	102129839	G	A	Nup98	c.4034C>T	p.Ala1345Val	missense_variant	MODERATE	35	0	0.036	37	9	0.272	2.63994
Aplan-10C-3677-Thy_vs_Aplan-10C-3677-Tail	chr7	102640892	102640892	G	C	Olfr554	c.645G>C	p.Ala215Ala	synonymous_variant	LOW	139	0	0.008683	175	56	0.314	5.8563
Aplan-10C-3677-Thy_vs_Aplan-10C-3677-Tail	chr7	102857173	102857173	G	C	Olfr566	c.99C>G	p.Ile33Met	missense_variant	MODERATE	298	0	0.004055	362	117	0.326	5.95041
Aplan-10C-3677-Thy_vs_Aplan-10C-3677-Tail	chr7	103098221	103098221	G	A	Olfr585	c.479G>A	p.Arg160His	missense_variant	MODERATE	314	1	0.00721	453	131	0.28	5.61855
Aplan-10C-3677-Thy_vs_Aplan-10C-3677-Tail	chr7	104960169	104960169	G	C	Olfr670	c.562C>G	p.Arg188Gly	missense_variant	MODERATE	155	0	0.007857	164	53	0.308	5.75601
Aplan-10C-3677-Thy_vs_Aplan-10C-3677-Tail	chr7	105753483	105753483	G	C	Dchs1	c.9851C>G	p.Pro3284Arg	missense_variant	MODERATE	16	0	0.07	26	7	0.293	1.48779
Aplan-10C-3677-Thy_vs_Aplan-10C-3677-Tail	chr7	108925787	108925787	G	C	Nlrp10	c.485C>G	p.Pro162Arg	missense_variant	MODERATE	83	0	0.014	84	25	0.306	6.5808
Aplan-10C-3677-Thy_vs_Aplan-10C-3677-Tail	chr7	110313991	110313991	G	C	Sbf2	c.5075C>G	p.Thr1692Arg	missense_variant	MODERATE	33	0	0.036	23	10	0.432	4.49308
Aplan-10C-3677-Thy_vs_Aplan-10C-3677-Tail	chr7	110316908	110316908	C	G	Sbf2	c.4755G>C	p.Pro1585Pro	synonymous_variant	LOW	178	0	0.006946	206	58	0.296	5.87473
Aplan-10C-3677-Thy_vs_Aplan-10C-3677-Tail	chr7	110800727	110800727	G	C	Ampd3	c.1021G>C	p.Asp341His	missense_variant	MODERATE	38	0	0.033	75	20	0.238	3.85806
Aplan-10C-3677-Thy_vs_Aplan-10C-3677-Tail	chr7	112954205	112954205	G	C	Rassf10	c.12G>C	p.Ser4Ser	synonymous_variant	LOW	21	0	0.05	23	8	0.336	2.40731
Aplan-10C-3677-Thy_vs_Aplan-10C-3677-Tail	chr7	116129398	116129398	C	G	Plekha7	c.3632G>C	p.Arg1211Pro	missense_variant	MODERATE	51	0	0.024	86	22	0.275	4.81328
Aplan-10C-3677-Thy_vs_Aplan-10C-3677-Tail	chr7	117667437	117667437	G	C	Xylt1	c.2677G>C	p.Gly893Arg	missense_variant	MODERATE	47	0	0.024	17	5	0.333	3.09066
Aplan-10C-3677-Thy_vs_Aplan-10C-3677-Tail	chr7	118190847	118190847	C	T	Smg1	c.1953G>A	p.Leu651Leu	synonymous_variant	LOW	77	0	0.014	108	36	0.313	5.90891
Aplan-10C-3677-Thy_vs_Aplan-10C-3677-Tail	chr7	118442461	118442461	G	C	Syt17	c.57C>G	p.Cys19Trp	missense_variant	MODERATE	17	0	0.055	20	8	0.376	2.40978
Aplan-10C-3677-Thy_vs_Aplan-10C-3677-Tail	chr7	118490106	118490106	G	C	Itpripl2	c.1229C>G	p.Ala410Gly	missense_variant	MODERATE	34	0	0.035	41	8	0.243	2.17136
Aplan-10C-3677-Thy_vs_Aplan-10C-3677-Tail	chr7	119500423	119500423	A	T	Pdilt	c.621T>A	p.Asn207Lys	missense_variant	MODERATE	107	0	0.011	139	64	0.483	6.08281
Aplan-10C-3677-Thy_vs_Aplan-10C-3677-Tail	chr7	125797589	125797589	G	C	D430042O09Rik	c.821G>C	p.Arg274Pro	missense_variant	MODERATE	66	0	0.019	100	33	0.342	6.24772
Aplan-10C-3677-Thy_vs_Aplan-10C-3677-Tail	chr7	126471806	126471806	G	C	Sh2b1	c.940-5C>G		splice_region_variant&intron_variant	LOW	62	0	0.019	73	17	0.27	4.94291
Aplan-10C-3677-Thy_vs_Aplan-10C-3677-Tail	chr7	126784548	126784548	C	G	Tbx6	c.851C>G	p.Ala284Gly	missense_variant	MODERATE	54	0	0.021	69	23	0.357	6.30774
Aplan-10C-3677-Thy_vs_Aplan-10C-3677-Tail	chr7	126829452	126829452	C	G	Fam57b	c.781C>G	p.Arg261Gly	missense_variant	MODERATE	18	0	0.063	30	9	0.346	1.75456
Aplan-10C-3677-Thy_vs_Aplan-10C-3677-Tail	chr7	126942178	126942178	G	C	Kctd13	c.589G>C	p.Glu197Gln	missense_variant	MODERATE	48	0	0.024	60	18	0.289	5.06937
Aplan-10C-3677-Thy_vs_Aplan-10C-3677-Tail	chr7	127194341	127194341	G	C	Cd2bp2	c.673C>G	p.Arg225Gly	missense_variant	MODERATE	72	0	0.016	110	31	0.298	5.97527
Aplan-10C-3677-Thy_vs_Aplan-10C-3677-Tail	chr7	127343685	127343685	G	C	Zfp768	c.1279C>G	p.Arg427Gly	missense_variant	MODERATE	46	1	0.029	50	13	0.276	3.02503
Aplan-10C-3677-Thy_vs_Aplan-10C-3677-Tail	chr7	127391772	127391772	G	C	E430018J23Rik	c.1042C>G	p.Arg348Gly	missense_variant	MODERATE	95	0	0.011	140	30	0.209	6.40836
Aplan-10C-3677-Thy_vs_Aplan-10C-3677-Tail	chr7	127752144	127752144	G	C	Fbxl19	c.924G>C	p.Ser308Ser	synonymous_variant	LOW	28	0	0.036	30	9	0.295	2.70068
Aplan-10C-3677-Thy_vs_Aplan-10C-3677-Tail	chr7	127802382	127802382	C	G	Hsd3b7	c.678C>G	p.His226Gln	missense_variant	MODERATE	26	0	0.04	52	18	0.366	3.46719
Aplan-10C-3677-Thy_vs_Aplan-10C-3677-Tail	chr7	127887570	127887570	G	C	Prss53	c.963C>G	p.His321Gln	missense_variant	MODERATE	55	0	0.024	62	12	0.245	3.46967
Aplan-10C-3677-Thy_vs_Aplan-10C-3677-Tail	chr7	127944783	127944783	C	G	Prss36	c.415G>C	p.Ala139Pro	missense_variant	MODERATE	19	0	0.053	29	12	0.418	2.88093
Aplan-10C-3677-Thy_vs_Aplan-10C-3677-Tail	chr7	128444392	128444392	G	C	Tial1	c.801C>G	p.His267Gln	missense_variant	MODERATE	116	0	0.009517	137	43	0.279	6.36551
Aplan-10C-3677-Thy_vs_Aplan-10C-3677-Tail	chr7	130979944	130979944	C	G	Htra1	c.973-8C>G		splice_region_variant&intron_variant	LOW	116	0	0.011	171	45	0.276	5.7631
Aplan-10C-3677-Thy_vs_Aplan-10C-3677-Tail	chr7	131103583	131103583	G	A	Dmbt1	c.3904G>A	p.Asp1302Asn	missense_variant	MODERATE	210	0	0.00572	218	58	0.269	6.09423
Aplan-10C-3677-Thy_vs_Aplan-10C-3677-Tail	chr7	132059821	132059821	G	C	Cpxm2	c.1236C>G	p.Asn412Lys	missense_variant	MODERATE	25	0	0.043	34	12	0.367	3.20076
Aplan-10C-3677-Thy_vs_Aplan-10C-3677-Tail	chr7	132883237	132883237	G	C	Fam175b	c.1008G>C	p.Arg336Ser	missense_variant	MODERATE	71	0	0.017	106	35	0.326	5.84635
Aplan-10C-3677-Thy_vs_Aplan-10C-3677-Tail	chr7	139653499	139653499	G	T	Cfap46	c.2229C>A	p.Tyr743*	stop_gained	HIGH	58	0	0.021	100	30	0.32	5.98644
Aplan-10C-3677-Thy_vs_Aplan-10C-3677-Tail	chr7	140969589	140969589	C	G	Ifitm1	c.284C>G	p.Thr95Arg	missense_variant	MODERATE	125	0	0.009746	174	41	0.232	6.1809
Aplan-10C-3677-Thy_vs_Aplan-10C-3677-Tail	chr7	141292310	141292310	C	G	Drd4	c.273C>G	p.Ser91Ser	synonymous_variant	LOW	25	0	0.05	29	6	0.272	1.59775
Aplan-10C-3677-Thy_vs_Aplan-10C-3677-Tail	chr7	141401753	141401753	C	G	Taldo1	c.634C>G	p.Pro212Ala	missense_variant	MODERATE	80	0	0.014	101	38	0.404	5.69965
Aplan-10C-3677-Thy_vs_Aplan-10C-3677-Tail	chr7	141402275	141402275	C	G	Taldo1	c.927C>G	p.Ser309Ser	synonymous_variant	LOW	22	0	0.048	29	19	0.667	6.19492
Aplan-10C-3677-Thy_vs_Aplan-10C-3677-Tail	chr7	141637148	141637148	C	G	Muc6	c.7020G>C	p.Pro2340Pro	synonymous_variant	LOW	186	0	0.006409	206	54	0.263	5.82628
Aplan-10C-3677-Thy_vs_Aplan-10C-3677-Tail	chr7	141651973	141651973	C	G	Muc6	c.241G>C	p.Ala81Pro	missense_variant	MODERATE	72	0	0.016	87	23	0.262	5.9261
Aplan-10C-3677-Thy_vs_Aplan-10C-3677-Tail	chr7	141812705	141812705	G	C	Muc5ac	c.6505G>C	p.Glu2169Gln	missense_variant	MODERATE	96	0	0.012	147	52	0.363	5.7156
Aplan-10C-3677-Thy_vs_Aplan-10C-3677-Tail	chr7	142370997	142370997	G	C	Ifitm10	c.104C>G	p.Thr35Arg	missense_variant	MODERATE	55	0	0.02	69	29	0.399	6.6363
Aplan-10C-3677-Thy_vs_Aplan-10C-3677-Tail	chr8	13560089	13560089	C	G	1700029H14Rik	c.235G>C	p.Gly79Arg	missense_variant	MODERATE	52	0	0.024	101	36	0.337	5.88577
Aplan-10C-3677-Thy_vs_Aplan-10C-3677-Tail	chr8	22065326	22065326	C	G	Alg11	c.602C>G	p.Thr201Arg	missense_variant	MODERATE	180	0	0.006224	192	65	0.343	5.66732
Aplan-10C-3677-Thy_vs_Aplan-10C-3677-Tail	chr8	22131304	22131304	C	G	Nek3	c.1208G>C	p.Arg403Pro	missense_variant	MODERATE	65	0	0.018	77	21	0.291	6.01894
Aplan-10C-3677-Thy_vs_Aplan-10C-3677-Tail	chr8	22243544	22243544	C	G	Thsd1	c.606C>G	p.Val202Val	synonymous_variant	LOW	60	0	0.018	88	40	0.453	6.40758
Aplan-10C-3677-Thy_vs_Aplan-10C-3677-Tail	chr8	22561134	22561134	C	G	Slc20a2	c.1182C>G	p.Cys394Trp	missense_variant	MODERATE	51	0	0.024	83	24	0.286	5.51906
Aplan-10C-3677-Thy_vs_Aplan-10C-3677-Tail	chr8	24791935	24791935	C	G	Adam5	c.1320G>C	p.Thr440Thr	splice_region_variant&synonymous_variant	LOW	39	0	0.029	63	18	0.311	4.09224
Aplan-10C-3677-Thy_vs_Aplan-10C-3677-Tail	chr8	25683294	25683294	C	G	Whsc1l1	c.2613C>G	p.Asn871Lys	missense_variant	MODERATE	167	0	0.007312	215	77	0.339	5.88114
Aplan-10C-3677-Thy_vs_Aplan-10C-3677-Tail	chr8	25946258	25946258	C	G	Hgsnat	c.1767G>C	p.Thr589Thr	synonymous_variant	LOW	62	0	0.018	68	21	0.328	6.02262
Aplan-10C-3677-Thy_vs_Aplan-10C-3677-Tail	chr8	27411804	27411804	G	A	Chrna6	c.141C>T	p.Arg47Arg	synonymous_variant	LOW	38	0	0.029	40	17	0.406	5.72735
Aplan-10C-3677-Thy_vs_Aplan-10C-3677-Tail	chr8	36584254	36584254	C	G	Dlc1	c.2322G>C	p.Pro774Pro	synonymous_variant	LOW	42	0	0.024	83	27	0.328	5.39136
Aplan-10C-3677-Thy_vs_Aplan-10C-3677-Tail	chr8	41209832	41209832	C	G	Fgl1	c.115G>C	p.Val39Leu	missense_variant	MODERATE	38	0	0.031	52	15	0.318	3.96188
Aplan-10C-3677-Thy_vs_Aplan-10C-3677-Tail	chr8	61353805	61353805	C	G	Sh3rf1	c.1136C>G	p.Ala379Gly	missense_variant	MODERATE	53	1	0.024	75	22	0.294	4.49151
Aplan-10C-3677-Thy_vs_Aplan-10C-3677-Tail	chr8	67963634	67963634	C	G	Psd3	c.752G>C	p.Arg251Pro	missense_variant	MODERATE	65	0	0.017	81	29	0.343	6.35684
Aplan-10C-3677-Thy_vs_Aplan-10C-3677-Tail	chr8	69813811	69813811	C	G	Gmip	c.660C>G	p.Ser220Ser	synonymous_variant	LOW	23	0	0.044	37	9	0.223	2.01333
Aplan-10C-3677-Thy_vs_Aplan-10C-3677-Tail	chr8	69817269	69817269	G	T	Gmip	c.1921G>T	p.Ala641Ser	missense_variant	MODERATE	71	0	0.016	73	23	0.305	5.97466
Aplan-10C-3677-Thy_vs_Aplan-10C-3677-Tail	chr8	70112513	70112513	G	C	Ncan	c.763C>G	p.Arg255Gly	missense_variant	MODERATE	57	0	0.021	96	27	0.275	6.00704
Aplan-10C-3677-Thy_vs_Aplan-10C-3677-Tail	chr8	70783484	70783484	G	C	Mast3	c.2251C>G	p.Arg751Gly	missense_variant	MODERATE	71	0	0.019	76	21	0.298	5.84038
Aplan-10C-3677-Thy_vs_Aplan-10C-3677-Tail	chr8	70852954	70852954	C	G	Kcnn1	c.611G>C	p.Arg204Pro	missense_variant	MODERATE	30	0	0.04	59	20	0.363	4.037
Aplan-10C-3677-Thy_vs_Aplan-10C-3677-Tail	chr8	71644917	71644917	G	C	Unc13a	c.3508C>G	p.Arg1170Gly	missense_variant	MODERATE	26	0	0.045	51	20	0.366	4.18092
Aplan-10C-3677-Thy_vs_Aplan-10C-3677-Tail	chr8	72462429	72462429	G	C	Cherp	c.2203C>G	p.Arg735Gly	missense_variant	MODERATE	59	0	0.023	62	29	0.47	5.91691
Aplan-10C-3677-Thy_vs_Aplan-10C-3677-Tail	chr8	72496571	72496571	G	C	Med26	c.683C>G	p.Pro228Arg	missense_variant	MODERATE	31	0	0.032	62	18	0.291	3.33808
Aplan-10C-3677-Thy_vs_Aplan-10C-3677-Tail	chr8	83271036	83271036	C	G	Tbc1d9	c.3221C>G	p.Pro1074Arg	missense_variant	MODERATE	40	0	0.025	61	16	0.267	3.80982
Aplan-10C-3677-Thy_vs_Aplan-10C-3677-Tail	chr8	84087787	84087787	G	C	Rfx1	c.984G>C	p.Thr328Thr	synonymous_variant	LOW	30	0	0.042	46	17	0.37	4.2997
Aplan-10C-3677-Thy_vs_Aplan-10C-3677-Tail	chr8	84098599	84098599	G	C	Dcaf15	c.1291C>G	p.Arg431Gly	missense_variant	MODERATE	88	0	0.014	119	53	0.452	6.06658
Aplan-10C-3677-Thy_vs_Aplan-10C-3677-Tail	chr8	84673215	84673215	G	C	Nacc1	c.1372C>G	p.Arg458Gly	missense_variant	MODERATE	72	0	0.017	93	25	0.326	5.96751
Aplan-10C-3677-Thy_vs_Aplan-10C-3677-Tail	chr8	84713803	84713803	C	G	Nfix	c.1433G>C	p.Arg478Pro	missense_variant	MODERATE	34	0	0.036	61	20	0.346	4.35976
Aplan-10C-3677-Thy_vs_Aplan-10C-3677-Tail	chr8	87687986	87687986	C	G	Zfp423	c.3703G>C	p.Gly1235Arg	missense_variant	MODERATE	49	0	0.023	32	14	0.419	6.58743
Aplan-10C-3677-Thy_vs_Aplan-10C-3677-Tail	chr8	87780838	87780838	C	G	Zfp423	c.2877G>C	p.Thr959Thr	synonymous_variant	LOW	50	1	0.024	61	23	0.388	5.47374
Aplan-10C-3677-Thy_vs_Aplan-10C-3677-Tail	chr8	87783144	87783144	G	C	Zfp423	c.571C>G	p.Arg191Gly	missense_variant	MODERATE	40	0	0.029	43	9	0.249	2.59388
Aplan-10C-3677-Thy_vs_Aplan-10C-3677-Tail	chr8	94941627	94941627	G	C	Adgrg5	c.1319G>C	p.Arg440Pro	missense_variant	MODERATE	40	0	0.031	46	16	0.359	4.96229
Aplan-10C-3677-Thy_vs_Aplan-10C-3677-Tail	chr8	95108674	95108674	C	G	Kifc3	c.982G>C	p.Glu328Gln	missense_variant	MODERATE	64	0	0.019	74	16	0.236	4.6666
Aplan-10C-3677-Thy_vs_Aplan-10C-3677-Tail	chr8	104292746	104292746	C	G	Cmtm2a	c.210G>C	p.Pro70Pro	synonymous_variant	LOW	104	0	0.011	129	47	0.366	5.99457
Aplan-10C-3677-Thy_vs_Aplan-10C-3677-Tail	chr8	104593969	104593969	C	G	Pdp2	c.449C>G	p.Ala150Gly	missense_variant	MODERATE	73	0	0.016	96	26	0.27	6.40781
Aplan-10C-3677-Thy_vs_Aplan-10C-3677-Tail	chr8	104617970	104617970	C	G	Cdh16	c.1528G>C	p.Asp510His	missense_variant	MODERATE	65	1	0.035	94	29	0.304	6.20534
Aplan-10C-3677-Thy_vs_Aplan-10C-3677-Tail	chr8	105051527	105051527	G	C	Ces3a	c.629G>C	p.Arg210Pro	missense_variant	MODERATE	107	0	0.011	133	40	0.32	5.97734
Aplan-10C-3677-Thy_vs_Aplan-10C-3677-Tail	chr8	105085633	105085633	C	G	Ces3b	c.513C>G	p.Tyr171*	stop_gained	HIGH	100	0	0.012	156	69	0.43	5.86069
Aplan-10C-3677-Thy_vs_Aplan-10C-3677-Tail	chr8	105270641	105270641	G	C	Hsf4	c.218G>C	p.Arg73Pro	missense_variant	MODERATE	20	0	0.056	32	10	0.345	2.07682
Aplan-10C-3677-Thy_vs_Aplan-10C-3677-Tail	chr8	105270995	105270995	C	T	Hsf4	c.368C>T	p.Ala123Val	missense_variant	MODERATE	47	0	0.024	56	14	0.26	4.04904
Aplan-10C-3677-Thy_vs_Aplan-10C-3677-Tail	chr8	105292697	105292697	C	G	Exoc3l	c.1337G>C	p.Arg446Pro	missense_variant	MODERATE	105	0	0.011	134	32	0.268	5.86881
Aplan-10C-3677-Thy_vs_Aplan-10C-3677-Tail	chr8	105293151	105293151	C	G	Exoc3l	c.1069G>C	p.Gly357Arg	missense_variant	MODERATE	107	0	0.011	166	38	0.236	5.95832
Aplan-10C-3677-Thy_vs_Aplan-10C-3677-Tail	chr8	105293252	105293253	CC	GG	Exoc3l	c.1039_1040delGGinsCC	p.Gly347Pro	missense_variant&splice_region_variant	MODERATE	79	0	0.015	135	33	0.254	6.01131
Aplan-10C-3677-Thy_vs_Aplan-10C-3677-Tail	chr8	105293473	105293473	C	G	Exoc3l	c.819G>C	p.Ala273Ala	synonymous_variant	LOW	31	0	0.032	38	9	0.25	2.49051
Aplan-10C-3677-Thy_vs_Aplan-10C-3677-Tail	chr8	105960695	105960695	C	G	Slc12a4	c.197G>C	p.Arg66Pro	missense_variant	MODERATE	95	0	0.013	118	33	0.266	6.2731
Aplan-10C-3677-Thy_vs_Aplan-10C-3677-Tail	chr8	106257649	106257649	G	C	Smpd3	c.1576C>G	p.Leu526Val	missense_variant	MODERATE	34	0	0.034	34	14	0.429	4.64607
Aplan-10C-3677-Thy_vs_Aplan-10C-3677-Tail	chr8	110084336	110084336	C	G	Zfp612	c.152-8C>G		splice_region_variant&intron_variant	LOW	65	0	0.02	62	20	0.308	6.42959
Aplan-10C-3677-Thy_vs_Aplan-10C-3677-Tail	chr8	110221382	110221382	C	G	Cmtr2	c.323C>G	p.Ala108Gly	missense_variant	MODERATE	66	0	0.017	83	18	0.214	4.86293
Aplan-10C-3677-Thy_vs_Aplan-10C-3677-Tail	chr8	110222351	110222351	C	G	Cmtr2	c.1292C>G	p.Thr431Arg	missense_variant	MODERATE	132	0	0.008837	158	68	0.422	5.77189
Aplan-10C-3677-Thy_vs_Aplan-10C-3677-Tail	chr8	110549624	110549624	C	G	Hydin	c.8999C>G	p.Thr3000Arg	missense_variant	MODERATE	70	0	0.018	71	26	0.393	5.85048
Aplan-10C-3677-Thy_vs_Aplan-10C-3677-Tail	chr8	110997668	110997668	G	C	Ddx19a	c.56C>G	p.Ser19Trp	missense_variant&splice_region_variant	MODERATE	43	0	0.031	46	16	0.326	5.14753
Aplan-10C-3677-Thy_vs_Aplan-10C-3677-Tail	chr8	111012766	111012766	G	C	Ddx19b	c.640C>G	p.Arg214Gly	missense_variant	MODERATE	194	0	0.006665	270	85	0.288	5.84445
Aplan-10C-3677-Thy_vs_Aplan-10C-3677-Tail	chr8	111481881	111481881	G	A	Wdr59	c.1368C>T	p.Ala456Ala	synonymous_variant	LOW	32	0	0.037	40	14	0.353	3.90054
Aplan-10C-3677-Thy_vs_Aplan-10C-3677-Tail	chr8	111496823	111496823	C	G	Wdr59	c.518G>C	p.Arg173Pro	missense_variant	MODERATE	57	0	0.019	97	42	0.421	5.8854
Aplan-10C-3677-Thy_vs_Aplan-10C-3677-Tail	chr8	119599413	119599413	C	G	Taf1c	c.1709G>C	p.Arg570Pro	missense_variant	MODERATE	16	0	0.063	29	13	0.458	2.86794
[truncated: 23,663 more rows]
