# Supplementary material for: 5-Aza-4’-thio-2’-deoxycytidine induces C&gt;G transversions in a specific trinucleotide context and leads to acute lymphoid leukemia
Source: Research Square preprint supplement (doi:10.21203/rs.3.rs-3186246/v1), 2023-12-19
Supplement: Supplementary file 4 [file 251fcf357c0934fd785cc5ba.xlsx]

## Sheet: Data
Mouse #	Treatment	IR	# Cycles at Death	Diagnoses	FACS Description	TCR or IgH Rearrangement
8379	ATC	0	5	T-ALL	CD4+/CD8+	Not Done
8382	ATC	0	5	Unknown	Found Dead	N/A
8387	ATC	0	7	B-ALL	CD19+/B220+	V5S17-J2, V8S8-J4
5155	ATC	0	9	Unknown	Found Dead	N/A
5158	ATC	0	5	T-ALL	CD8+/CD4het	V3S2-J1S1, D2-J2S1
7928	ATC	600	5	T-ALL	CD8+	D1-J1S6, V19S2-D2-J2S7
7924	ATC	600	4	T-ALL	CD8+/CD4het	Not Done
1708	ATC	600	4	T-ALL	CD8+	Not Done
1701	ATC	600	4	T-ALL	CD8+	Not Done
7821	ATC	600	4	T-ALL	CD8+/CD4het	V2S2-J2S3
8395	PBS	0	Survived to Endpoint.	Survived to Endpoint.	Survived to Endpoint.	Survived to Endpoint.
8405	PBS	0	Survived to Endpoint.	Survived to Endpoint.	Survived to Endpoint.	Survived to Endpoint.
8406	PBS	0	Survived to Endpoint.	Survived to Endpoint.	Survived to Endpoint.	Survived to Endpoint.
5157	PBS	0	Survived to Endpoint.	Survived to Endpoint.	Survived to Endpoint.	Survived to Endpoint.
8390	PBS	0	3	Lung Cancer	Unremarkable	N/A
7929	PBS	600	Survived to Endpoint.	Survived to Endpoint.	Survived to Endpoint.	Survived to Endpoint.
7930	PBS	600	Survived to Endpoint.	Survived to Endpoint.	Survived to Endpoint.	Survived to Endpoint.
1702	PBS	600	Survived to Endpoint.	Survived to Endpoint.	Survived to Endpoint.	Survived to Endpoint.
1707	PBS	600	Survived to Endpoint.	Survived to Endpoint.	Survived to Endpoint.	Survived to Endpoint.
7921	PBS	600	5	Myelofibrosis	High dead cell/debris	N/A
3675	ATC	600	4	Unknown	Found Dead	N/A
3676	ATC	600	5	ETP-ALL	Negative for lineage markers	V8S2-J1S6
3677	ATC	600	5	T-ALL	CD4+/CD8+	V16S1-D2-J2S7
3678	ATC	600	4	T-ALL and B-ALL	Thymus: CD8+. BM and Spl: CD19+/B220-	Thymus VDJ: V6S1-D1-J2S7. BM, Spl IgH: V2S3-D3S2-J3
3679	ATC	600	5	T-ALL and ETP	CD4+/CD8+	V12S1-D2-J1S2, V5S2-D1-J2S7
3680	ATC	600	4	T-ALL	CD8+/CD4het	Oligoclonal VDJ: Multiple V's-J1S1
3682	ATC	0	5	T-ALL and ETP-ALL	BM, Spl: CD4+/CD8+. Thymus: Negative for all lineage markers	BM, SPl: V8S3-D1-J2S5. Thymus: D2-J2S5
3683	ATC	0	6	T-ALL	BM, Spl: CD4+/CD8+. Thymus: CD8+	V5S1-D2-J2S1/J2S4
3684	ATC	0	7	T-ALL	Thymus, LM: CD4+/CD8+. Spl: CD8+	V7S1-D1-J2S3/J2S2
3685	ATC	0	5	Unknown	Unremarkable	N/A
3689	ATC	0	6	T-ALL	CD8+	V1S1-D1-J1S1
3690	ATC	0	7	T-ALL	CD4+/CD8+	V8S3-D1-J1S1
3691	ATC	0	5	T-ALL and ETP-ALL	Thymus, LN: CD8+/CD4+ and population negative for all lineage markers	D1-J1S1/J1S2
3686	PBS	600	Survived to Endpoint.	Survived to Endpoint.	Survived to Endpoint.	Survived to Endpoint.
3687	PBS	600	Survived to Endpoint.	Survived to Endpoint.	Survived to Endpoint.	Survived to Endpoint.
3688	PBS	600	Survived to Endpoint.	Survived to Endpoint.	Survived to Endpoint.	Survived to Endpoint.
3692	PBS	600	Survived to Endpoint.	Survived to Endpoint.	Survived to Endpoint.	Survived to Endpoint.
3693	PBS	600	Survived to Endpoint.	Survived to Endpoint.	Survived to Endpoint.	Survived to Endpoint.
3694	PBS	600	Survived to Endpoint.	Survived to Endpoint.	Survived to Endpoint.	Survived to Endpoint.
3635	ATC	600	3	T-ALL	CD4+/CD8+	V5S1-D2-J2S3
3636	ATC	600	4	T-ALL	CD8+/CD4het	V6S1-D2-J2S3
3637	ATC	600	3	T-ALL and B-ALL	CD8+/CD4het	Oligoclonal VDJ
3638	ATC	600	4	T-ALL	CD8+/CD4het	V8S2-D1-J1S3, V8S3-D2-J2S7
3639	ATC	600	4	T-ALL	CD4+/CD8+	V2S1-D1-J1S5
3640	ATC	0	6	Unknown	Found Dead	N/A
3641	ATC	0	3	Unknown	Found Dead	N/A
3642	ATC	0	5	ETP-ALL	CD8+/CD4het	V13S1-D1-J2S7
3643	ATC	0	3	Unknown	Found Dead	N/A
3644	ATC	0	4	B-ALL	CD19+/B220+	V2S2-J3
3645	PBS	0	Survived to Endpoint.	Survived to Endpoint.	Survived to Endpoint.	Survived to Endpoint.
3646	PBS	0	Survived to Endpoint.	Survived to Endpoint.	Survived to Endpoint.	Survived to Endpoint.
3647	PBS	0	Survived to Endpoint.	Survived to Endpoint.	Survived to Endpoint.	Survived to Endpoint.
3648	PBS	0	Survived to Endpoint.	Survived to Endpoint.	Survived to Endpoint.	Survived to Endpoint.
3649	PBS	0	Survived to Endpoint.	Survived to Endpoint.	Survived to Endpoint.	Survived to Endpoint.
AML = Acute Myeloid Leukemia, T-ALL = T cell acute lymphoblastic leukemia, B-ALL = B cell acute lymphoblastic leukemia, ETP = Early thymic progenitor acute lymphoblastic leukemia, MDS= Myelodysplastic Syndrome, N/A = Not applicable, either the mouse did not have evidence of ALL or was found dead
