# Supplementary material for: 5-Aza-4’-thio-2’-deoxycytidine induces C&gt;G transversions in a specific trinucleotide context and leads to acute lymphoid leukemia
Source: Research Square preprint supplement (doi:10.21203/rs.3.rs-3186246/v1), 2023-12-19
Supplement: Supplementary file 5 [file 362f715e93ccd3cb5c2f3b66.xlsx]

## Sheet: Sheet1
SampleName	Chr	Start	End	REF	ALT	Gene_Name	HGVS.c	HGVS.p	Annotation	Annotation_Impact	DP_NORMAL	AD_NORMAL.2	AF_NORMAL	DP_TUMOR	AD_TUMOR.2	AF_TUMOR	LOG_FISHER
Aplan-CEM-ATC25-C1_vs_Aplan-CEM-PreTreatment	chr1	930285	930285	G	C	SAMD11	c.203G>C	p.Arg68Pro	missense_variant	MODERATE	54	1	0.024	75	17	0.246	3.27411
Aplan-CEM-ATC25-C1_vs_Aplan-CEM-PreTreatment	chr1	955975	955975	T	C	NOC2L	c.646A>G	p.Ile216Val	missense_variant	MODERATE	41	0	0.024	64	15	0.251	3.45029
Aplan-CEM-ATC25-C1_vs_Aplan-CEM-PreTreatment	chr1	970274	970274	T	C	PLEKHN1	c.184-3T>C		splice_region_variant&intron_variant	LOW	51	0	0.024	68	16	0.246	4.20103
Aplan-CEM-ATC25-C1_vs_Aplan-CEM-PreTreatment	chr1	980241	980241	C	A	PERM1	c.789G>T	p.Glu263Asp	missense_variant	MODERATE	99	0	0.011	153	36	0.25	6.26441
Aplan-CEM-ATC25-C1_vs_Aplan-CEM-PreTreatment	chr1	1051607	1051608	TG	T	AGRN	c.5526delG	p.Cys1843fs	frameshift_variant	HIGH	63	0	0.017	116	33	0.288	6.6036
Aplan-CEM-ATC25-C1_vs_Aplan-CEM-PreTreatment	chr1	1286246	1286246	G	A	SCNN1D	c.882G>A	p.Pro294Pro	synonymous_variant	LOW	42	0	0.026	86	33	0.373	6.25104
Aplan-CEM-ATC25-C1_vs_Aplan-CEM-PreTreatment	chr1	1615539	1615539	A	G	MIB2	c.80A>G	p.Gln27Arg	missense_variant	MODERATE	47	0	0.026	68	37	0.536	6.33253
Aplan-CEM-ATC25-C1_vs_Aplan-CEM-PreTreatment	chr1	1754595	1754595	C	G	NADK	c.1227G>C	p.Ser409Ser	synonymous_variant	LOW	54	0	0.019	100	31	0.294	6.02357
Aplan-CEM-ATC25-C1_vs_Aplan-CEM-PreTreatment	chr1	1918130	1918130	G	C	TMEM52	c.382C>G	p.Arg128Gly	missense_variant	MODERATE	49	0	0.02	89	23	0.269	4.73036
Aplan-CEM-ATC25-C1_vs_Aplan-CEM-PreTreatment	chr1	3498456	3498456	G	C	MEGF6	c.3267C>G	p.Gly1089Gly	synonymous_variant	LOW	70	0	0.017	99	26	0.226	5.83152
Aplan-CEM-ATC25-C1_vs_Aplan-CEM-PreTreatment	chr1	9601391	9601391	C	G	TMEM201	c.893C>G	p.Thr298Arg	missense_variant	MODERATE	47	0	0.022	95	27	0.29	5.2266
Aplan-CEM-ATC25-C1_vs_Aplan-CEM-PreTreatment	chr1	9720011	9720011	G	T	PIK3CD	c.1228G>T	p.Val410Phe	missense_variant	MODERATE	60	0	0.019	54	21	0.425	6.18999
Aplan-CEM-ATC25-C1_vs_Aplan-CEM-PreTreatment	chr1	9720584	9720584	G	A	PIK3CD	c.1516G>A	p.Asp506Asn	missense_variant	MODERATE	46	0	0.023	66	15	0.25	3.49425
Aplan-CEM-ATC25-C1_vs_Aplan-CEM-PreTreatment	chr1	9720592	9720592	G	A	PIK3CD	c.1524G>A	p.Glu508Glu	synonymous_variant	LOW	46	0	0.022	66	14	0.231	3.45449
Aplan-CEM-ATC25-C1_vs_Aplan-CEM-PreTreatment	chr1	9733430	9733430	G	A	CLSTN1	c.2398C>T	p.Arg800Cys	missense_variant	MODERATE	49	0	0.023	61	16	0.264	4.36354
Aplan-CEM-ATC25-C1_vs_Aplan-CEM-PreTreatment	chr1	10399638	10399638	C	T	PGD	c.18C>T	p.I6I	structural_interaction_variant	HIGH	14	0	0.063	25	12	0.524	2.58733
Aplan-CEM-ATC25-C1_vs_Aplan-CEM-PreTreatment	chr1	10419442	10419442	C	G	PGD	c.1235C>G	p.Thr412Ser	missense_variant	MODERATE	36	0	0.026	71	20	0.323	3.89375
Aplan-CEM-ATC25-C1_vs_Aplan-CEM-PreTreatment	chr1	11256167	11256167	A	G	MTOR	c.530T>C	p.Ile177Thr	missense_variant	MODERATE	56	0	0.02	87	40	0.444	6.09107
Aplan-CEM-ATC25-C1_vs_Aplan-CEM-PreTreatment	chr1	11789398	11789398	G	T	C1orf167	c.4359G>T	p.Pro1453Pro	synonymous_variant	LOW	65	0	0.019	97	24	0.23	5.81146
Aplan-CEM-ATC25-C1_vs_Aplan-CEM-PreTreatment	chr1	11992678	11992679	CT	C	MFN2	c.306delT	p.Phe102fs	frameshift_variant	HIGH	62	0	0.019	75	35	0.466	6.51557
Aplan-CEM-ATC25-C1_vs_Aplan-CEM-PreTreatment	chr1	12725419	12725419	G	C	AADACL3	c.647G>C	p.Arg216Pro	missense_variant	MODERATE	55	0	0.018	99	23	0.238	4.66387
Aplan-CEM-ATC25-C1_vs_Aplan-CEM-PreTreatment	chr1	15744350	15744350	G	T	TMEM82	c.527G>T	p.Arg176Leu	missense_variant	MODERATE	36	0	0.03	55	15	0.289	3.54745
Aplan-CEM-ATC25-C1_vs_Aplan-CEM-PreTreatment	chr1	16198695	16198695	G	C	ARHGEF19	c.2301C>G	p.Pro767Pro	synonymous_variant	LOW	51	0	0.022	63	18	0.32	5.05285
Aplan-CEM-ATC25-C1_vs_Aplan-CEM-PreTreatment	chr1	16939906	16939906	C	G	CROCC	c.1621C>G	p.Arg541Gly	missense_variant	MODERATE	40	0	0.027	48	11	0.22	3.10891
Aplan-CEM-ATC25-C1_vs_Aplan-CEM-PreTreatment	chr1	16975724	16975724	C	G	MFAP2	c.293G>C	p.Arg98Pro	missense_variant	MODERATE	19	0	0.053	34	11	0.333	2.34916
Aplan-CEM-ATC25-C1_vs_Aplan-CEM-PreTreatment	chr1	19141428	19141429	TG	T	UBR4	c.8406delC	p.Met2803fs	frameshift_variant	HIGH	73	0	0.015	101	56	0.556	5.88425
Aplan-CEM-ATC25-C1_vs_Aplan-CEM-PreTreatment	chr1	20353847	20353847	T	TC	VWA5B1	c.3252dupC	p.Phe1085fs	frameshift_variant	HIGH	80	0	0.013	136	34	0.258	5.96247
Aplan-CEM-ATC25-C1_vs_Aplan-CEM-PreTreatment	chr1	20485248	20485248	C	G	CAMK2N1	c.132G>C	p.Pro44Pro	synonymous_variant	LOW	28	0	0.038	54	14	0.304	2.75969
Aplan-CEM-ATC25-C1_vs_Aplan-CEM-PreTreatment	chr1	21617325	21617325	C	G	RAP1GAP	c.272G>C	p.Arg91Pro	missense_variant	MODERATE	58	0	0.019	68	22	0.295	6.50956
Aplan-CEM-ATC25-C1_vs_Aplan-CEM-PreTreatment	chr1	21876357	21876357	C	T	HSPG2	c.2875G>A	p.Ala959Thr	missense_variant	MODERATE	63	1	0.036	77	24	0.314	5.58533
Aplan-CEM-ATC25-C1_vs_Aplan-CEM-PreTreatment	chr1	22953390	22953390	A	G	LACTBL1	c.1294T>C	p.Tyr432His	missense_variant	MODERATE	64	0	0.017	82	19	0.243	5.14899
Aplan-CEM-ATC25-C1_vs_Aplan-CEM-PreTreatment	chr1	25392095	25392095	T	C	RHCE	c.533A>G	p.Tyr178Cys	missense_variant	MODERATE	75	0	0.015	110	24	0.22	5.75384
Aplan-CEM-ATC25-C1_vs_Aplan-CEM-PreTreatment	chr1	26473731	26473731	C	T	HMGN2	c.89C>T	p.Ala30Val	missense_variant&splice_region_variant	MODERATE	42	0	0.025	34	16	0.484	6.69143
Aplan-CEM-ATC25-C1_vs_Aplan-CEM-PreTreatment	chr1	26773688	26773688	C	G	ARID1A	c.3975C>G	p.Pro1325Pro	synonymous_variant	LOW	117	0	0.009554	175	41	0.222	5.86512
Aplan-CEM-ATC25-C1_vs_Aplan-CEM-PreTreatment	chr1	27006065	27006065	G	A	FAM46B	c.1157C>T	p.Ala386Val	missense_variant	MODERATE	86	0	0.013	147	39	0.244	5.96955
Aplan-CEM-ATC25-C1_vs_Aplan-CEM-PreTreatment	chr1	27550653	27550653	C	G	AHDC1	c.1463G>C	p.Arg488Pro	missense_variant	MODERATE	97	0	0.012	152	38	0.256	6.04707
Aplan-CEM-ATC25-C1_vs_Aplan-CEM-PreTreatment	chr1	27552009	27552010	CG	C	AHDC1	c.106delC	p.Arg36fs	frameshift_variant	HIGH	39	0	0.024	39	11	0.289	3.36559
Aplan-CEM-ATC25-C1_vs_Aplan-CEM-PreTreatment	chr1	27615684	27615684	C	A	FGR	c.838+5G>T		splice_region_variant&intron_variant	LOW	75	0	0.015	81	22	0.274	6.19527
Aplan-CEM-ATC25-C1_vs_Aplan-CEM-PreTreatment	chr1	27668218	27668218	G	A	IFI6	c.322+8C>T		splice_region_variant&intron_variant	LOW	50	0	0.022	67	37	0.532	5.71043
Aplan-CEM-ATC25-C1_vs_Aplan-CEM-PreTreatment	chr1	28272300	28272301	AG	CA	SESN2	c.371_372delAGinsCA	p.Gln124Pro	missense_variant	MODERATE	44	0	0.024	48	12	0.293	3.60181
Aplan-CEM-ATC25-C1_vs_Aplan-CEM-PreTreatment	chr1	29121219	29121219	G	A	TMEM200B	c.610C>T	p.Arg204Trp	missense_variant	MODERATE	86	0	0.013	100	29	0.281	5.92931
Aplan-CEM-ATC25-C1_vs_Aplan-CEM-PreTreatment	chr1	29260010	29260010	G	C	PTPRU	c.816G>C	p.Ala272Ala	synonymous_variant	LOW	54	1	0.023	66	26	0.365	6.52185
Aplan-CEM-ATC25-C1_vs_Aplan-CEM-PreTreatment	chr1	30741651	30741651	C	T	LAPTM5	c.247G>A	p.Gly83Ser	missense_variant	MODERATE	17	0	0.067	36	14	0.382	2.679
Aplan-CEM-ATC25-C1_vs_Aplan-CEM-PreTreatment	chr1	31577388	31577388	G	C	TINAGL1	c.240G>C	p.Thr80Thr	synonymous_variant	LOW	51	0	0.022	96	34	0.353	5.93381
Aplan-CEM-ATC25-C1_vs_Aplan-CEM-PreTreatment	chr1	31814537	31814537	G	A	SPOCD1	c.797C>T	p.Ser266Phe	missense_variant	MODERATE	77	0	0.014	95	21	0.222	5.80708
Aplan-CEM-ATC25-C1_vs_Aplan-CEM-PreTreatment	chr1	32193221	32193221	C	T	TXLNA	c.1172C>T	p.Thr391Ile	missense_variant	MODERATE	20	0	0.053	21	8	0.368	2.46242
Aplan-CEM-ATC25-C1_vs_Aplan-CEM-PreTreatment	chr1	32222577	32222577	C	T	EIF3I	c.43C>T	p.Gln15*	stop_gained	HIGH	43	0	0.026	61	20	0.316	5.23707
Aplan-CEM-ATC25-C1_vs_Aplan-CEM-PreTreatment	chr1	33118003	33118003	C	T	AZIN2	c.1191C>T	p.His397His	synonymous_variant	LOW	63	0	0.019	87	47	0.514	6.09839
Aplan-CEM-ATC25-C1_vs_Aplan-CEM-PreTreatment	chr1	33281736	33281736	T	C	ZNF362	c.833T>C	p.Leu278Pro	missense_variant	MODERATE	46	0	0.025	80	19	0.246	3.88842
Aplan-CEM-ATC25-C1_vs_Aplan-CEM-PreTreatment	chr1	33557839	33557839	T	C	CSMD2	c.8638A>G	p.Thr2880Ala	missense_variant	MODERATE	42	0	0.024	73	35	0.459	6.27951
Aplan-CEM-ATC25-C1_vs_Aplan-CEM-PreTreatment	chr1	33935757	33935757	T	C	CSMD2	c.712+3A>G		splice_region_variant&intron_variant	LOW	18	0	0.053	50	23	0.45	3.59415
Aplan-CEM-ATC25-C1_vs_Aplan-CEM-PreTreatment	chr1	34987392	34987392	G	A	ZMYM6	c.3690C>T	p.Phe1230Phe	synonymous_variant	LOW	54	0	0.02	88	26	0.282	5.72685
Aplan-CEM-ATC25-C1_vs_Aplan-CEM-PreTreatment	chr1	35562544	35562544	C	T	NCDN	c.1296C>T	p.Ala432Ala	synonymous_variant	LOW	81	0	0.014	114	64	0.573	5.95311
Aplan-CEM-ATC25-C1_vs_Aplan-CEM-PreTreatment	chr1	35745522	35745522	C	G	CLSPN	c.2895G>C	p.Glu965Asp	missense_variant	MODERATE	38	0	0.031	31	9	0.351	3.44888
Aplan-CEM-ATC25-C1_vs_Aplan-CEM-PreTreatment	chr1	35825946	35825946	C	G	AGO4	c.646C>G	p.Arg216Gly	missense_variant	MODERATE	82	0	0.015	88	17	0.212	5.1179
Aplan-CEM-ATC25-C1_vs_Aplan-CEM-PreTreatment	chr1	36085005	36085005	C	T	TEKT2	c.84C>T	p.Ala28Ala	synonymous_variant	LOW	100	0	0.012	113	27	0.229	6.44594
Aplan-CEM-ATC25-C1_vs_Aplan-CEM-PreTreatment	chr1	36088073	36088073	C	G	TEKT2	c.1180C>G	p.Arg394Gly	missense_variant	MODERATE	52	0	0.021	93	23	0.259	4.70672
Aplan-CEM-ATC25-C1_vs_Aplan-CEM-PreTreatment	chr1	36092446	36092446	C	G	ADPRHL2	c.726C>G	p.Tyr242*	stop_gained	HIGH	31	0	0.034	59	12	0.207	2.16903
Aplan-CEM-ATC25-C1_vs_Aplan-CEM-PreTreatment	chr1	36343981	36343981	T	C	STK40	c.900-2A>G		splice_acceptor_variant&intron_variant	HIGH	84	0	0.013	119	58	0.446	5.82941
Aplan-CEM-ATC25-C1_vs_Aplan-CEM-PreTreatment	chr1	36859879	36859879	G	A	GRIK3	c.925C>T	p.Arg309Trp	missense_variant	MODERATE	26	0	0.045	44	24	0.556	6.14588
Aplan-CEM-ATC25-C1_vs_Aplan-CEM-PreTreatment	chr1	37807099	37807099	A	G	YRDC	c.504+2T>C		splice_donor_variant&intron_variant	HIGH	49	0	0.024	75	44	0.585	5.9662
Aplan-CEM-ATC25-C1_vs_Aplan-CEM-PreTreatment	chr1	37969733	37969733	T	C	SF3A3	c.1008A>G	p.Glu336Glu	splice_region_variant&synonymous_variant	LOW	41	0	0.029	57	15	0.3	3.8792
Aplan-CEM-ATC25-C1_vs_Aplan-CEM-PreTreatment	chr1	39562343	39562344	TG	T	PABPC4	c.1741delC	p.Gln581fs	frameshift_variant	HIGH	22	0	0.045	35	16	0.452	3.88695
Aplan-CEM-ATC25-C1_vs_Aplan-CEM-PreTreatment	chr1	39788473	39788473	G	T	BMP8B	c.13C>A	p.Pro5Thr	missense_variant	MODERATE	19	0	0.067	40	12	0.333	2.23114
Aplan-CEM-ATC25-C1_vs_Aplan-CEM-PreTreatment	chr1	40763025	40763025	A	G	NFYC	c.699A>G	p.Thr233Thr	synonymous_variant	LOW	51	0	0.024	70	19	0.28	4.83516
Aplan-CEM-ATC25-C1_vs_Aplan-CEM-PreTreatment	chr1	41381788	41381788	G	C	FOXO6	c.587G>C	p.Gly196Ala	missense_variant	MODERATE	61	0	0.02	65	22	0.31	6.34075
Aplan-CEM-ATC25-C1_vs_Aplan-CEM-PreTreatment	chr1	41479441	41479441	G	C	EDN2	c.505C>G	p.Arg169Gly	missense_variant	MODERATE	26	0	0.043	39	11	0.305	2.67518
Aplan-CEM-ATC25-C1_vs_Aplan-CEM-PreTreatment	chr1	42153544	42153544	A	T	GUCA2B	c.90+4A>T		splice_region_variant&intron_variant	LOW	22	0	0.056	21	8	0.381	2.85285
Aplan-CEM-ATC25-C1_vs_Aplan-CEM-PreTreatment	chr1	43305025	43305025	T	C	TIE1	c.233T>C	p.Leu78Pro	missense_variant	MODERATE	87	0	0.013	136	33	0.267	6.00744
Aplan-CEM-ATC25-C1_vs_Aplan-CEM-PreTreatment	chr1	43899644	43899644	G	A	ST3GAL3	c.868G>A	p.Glu290Lys	missense_variant	MODERATE	54	0	0.022	81	40	0.477	6.06387
Aplan-CEM-ATC25-C1_vs_Aplan-CEM-PreTreatment	chr1	43971625	43971625	G	A	DPH2	c.723G>A	p.Trp241*	stop_gained	HIGH	94	0	0.012	112	33	0.268	6.17377
Aplan-CEM-ATC25-C1_vs_Aplan-CEM-PreTreatment	chr1	44017115	44017115	G	C	SLC6A9	c.19C>G	p.Arg7Gly	missense_variant	MODERATE	61	0	0.018	70	17	0.254	5.04641
Aplan-CEM-ATC25-C1_vs_Aplan-CEM-PreTreatment	chr1	44806084	44806084	C	G	TCTEX1D4	c.585G>C	p.Ala195Ala	synonymous_variant	LOW	77	0	0.014	127	30	0.256	6.25443
Aplan-CEM-ATC25-C1_vs_Aplan-CEM-PreTreatment	chr1	44941509	44941510	CT	C	EIF2B3	c.450delA	p.Ala151fs	frameshift_variant	HIGH	40	0	0.028	53	38	0.703	5.81834
Aplan-CEM-ATC25-C1_vs_Aplan-CEM-PreTreatment	chr1	45622555	45622555	G	C	CCDC17	c.853C>G	p.Arg285Gly	missense_variant	MODERATE	42	0	0.025	81	19	0.244	3.50255
Aplan-CEM-ATC25-C1_vs_Aplan-CEM-PreTreatment	chr1	45622964	45622964	G	C	CCDC17	c.647C>G	p.Ala216Gly	missense_variant	MODERATE	45	0	0.024	79	16	0.208	3.28983
Aplan-CEM-ATC25-C1_vs_Aplan-CEM-PreTreatment	chr1	45623301	45623301	G	C	CCDC17	c.409C>G	p.Arg137Gly	missense_variant	MODERATE	81	0	0.014	129	26	0.201	5.843
Aplan-CEM-ATC25-C1_vs_Aplan-CEM-PreTreatment	chr1	45623365	45623365	G	C	CCDC17	c.345C>G	p.Pro115Pro	synonymous_variant	LOW	106	0	0.011	135	28	0.218	6.08905
Aplan-CEM-ATC25-C1_vs_Aplan-CEM-PreTreatment	chr1	46196751	46196751	C	T	POMGNT1	c.334G>A	p.Val112Met	missense_variant	MODERATE	54	0	0.022	63	30	0.491	6.52052
Aplan-CEM-ATC25-C1_vs_Aplan-CEM-PreTreatment	chr1	47225895	47225895	G	C	TAL1	c.-1-6C>G		splice_region_variant&intron_variant	LOW	21	0	0.04	35	11	0.285	2.39128
Aplan-CEM-ATC25-C1_vs_Aplan-CEM-PreTreatment	chr1	47438503	47438503	G	C	FOXD2	c.368G>C	p.Ser123Thr	missense_variant	MODERATE	41	0	0.025	73	23	0.348	4.9075
Aplan-CEM-ATC25-C1_vs_Aplan-CEM-PreTreatment	chr1	49045608	49045608	A	G	AGBL4	c.570T>C	p.Phe190Phe	synonymous_variant	LOW	32	0	0.033	66	40	0.607	6.25207
Aplan-CEM-ATC25-C1_vs_Aplan-CEM-PreTreatment	chr1	55058567	55058567	G	C	PCSK9	c.1423G>C	p.A475P	structural_interaction_variant	HIGH	54	0	0.021	107	34	0.287	6.11638
Aplan-CEM-ATC25-C1_vs_Aplan-CEM-PreTreatment	chr1	56720327	56720327	G	C	C1orf168	c.1977C>G	p.Tyr659*	stop_gained&splice_region_variant	HIGH	24	0	0.04	56	13	0.235	2.11316
Aplan-CEM-ATC25-C1_vs_Aplan-CEM-PreTreatment	chr1	68159196	68159196	G	A	WLS	c.425C>T	p.Ala142Val	missense_variant	MODERATE	56	0	0.022	62	18	0.288	5.58016
Aplan-CEM-ATC25-C1_vs_Aplan-CEM-PreTreatment	chr1	70016495	70016495	A	G	LRRC7	c.1167A>G	p.Lys389Lys	synonymous_variant	LOW	25	0	0.043	32	12	0.37	3.27715
Aplan-CEM-ATC25-C1_vs_Aplan-CEM-PreTreatment	chr1	70089714	70089715	CT	C	LRRC7	c.4339-7delT		splice_region_variant&intron_variant	LOW	20	0	0.06	25	15	0.565	4.90893
Aplan-CEM-ATC25-C1_vs_Aplan-CEM-PreTreatment	chr1	74204531	74204531	A	AT	FPGT	c.525dupT	p.Leu176fs	frameshift_variant	HIGH	19	0	0.053	34	11	0.354	2.34916
Aplan-CEM-ATC25-C1_vs_Aplan-CEM-PreTreatment	chr1	78013451	78013452	TA	T	DNAJB4	c.618delA	p.Trp208fs	frameshift_variant	HIGH	59	0	0.018	99	24	0.226	5.31835
Aplan-CEM-ATC25-C1_vs_Aplan-CEM-PreTreatment	chr1	89011960	89011960	G	A	GBP3	c.936C>T	p.Asn312Asn	synonymous_variant	LOW	87	0	0.014	122	66	0.543	6.02503
Aplan-CEM-ATC25-C1_vs_Aplan-CEM-PreTreatment	chr1	92177857	92177857	T	TA	BTBD8	c.2407dupA	p.Ser803fs	frameshift_variant	HIGH	30	0	0.044	34	14	0.417	4.49315
Aplan-CEM-ATC25-C1_vs_Aplan-CEM-PreTreatment	chr1	92481012	92481012	G	C	GFI1	c.375C>G	p.Ser125Arg	missense_variant	MODERATE	39	0	0.027	71	20	0.271	4.21947
Aplan-CEM-ATC25-C1_vs_Aplan-CEM-PreTreatment	chr1	94063225	94063225	G	C	ABCA4	c.1647C>G	p.Ala549Ala	synonymous_variant	LOW	32	0	0.031	69	16	0.242	2.65029
Aplan-CEM-ATC25-C1_vs_Aplan-CEM-PreTreatment	chr1	98738252	98738252	G	A	SNX7	c.1141G>A	p.Gly381Arg	missense_variant	MODERATE	36	0	0.031	63	16	0.25	3.38496
Aplan-CEM-ATC25-C1_vs_Aplan-CEM-PreTreatment	chr1	109491016	109491016	C	A	ATXN7L2	c.1453C>A	p.Leu485Ile	missense_variant	MODERATE	71	0	0.015	108	23	0.231	5.39784
Aplan-CEM-ATC25-C1_vs_Aplan-CEM-PreTreatment	chr1	110043750	110043750	G	C	STRIP1	c.1180G>C	p.Glu394Gln	missense_variant	MODERATE	26	0	0.04	51	16	0.289	3.1438
Aplan-CEM-ATC25-C1_vs_Aplan-CEM-PreTreatment	chr1	110070492	110070492	C	A	ALX3	c.121G>T	p.Ala41Ser	missense_variant	MODERATE	55	0	0.02	107	27	0.265	5.13758
Aplan-CEM-ATC25-C1_vs_Aplan-CEM-PreTreatment	chr1	110174861	110174861	G	C	SLC6A17	c.654G>C	p.Ser218Ser	synonymous_variant	LOW	77	0	0.015	91	22	0.262	6.24951
Aplan-CEM-ATC25-C1_vs_Aplan-CEM-PreTreatment	chr1	111194711	111194711	G	C	DENND2D	c.661C>G	p.Arg221Gly	missense_variant	MODERATE	38	0	0.027	64	15	0.26	3.08948
Aplan-CEM-ATC25-C1_vs_Aplan-CEM-PreTreatment	chr1	111317687	111317687	C	T	CHIA	c.487C>T	p.R163C	structural_interaction_variant	HIGH	22	0	0.042	51	13	0.25	2.14701
Aplan-CEM-ATC25-C1_vs_Aplan-CEM-PreTreatment	chr1	112514987	112514987	G	C	WNT2B	c.296G>C	p.Gly99Ala	missense_variant	MODERATE	54	0	0.021	83	24	0.291	5.51758
Aplan-CEM-ATC25-C1_vs_Aplan-CEM-PreTreatment	chr1	112689646	112689646	C	T	MOV10	c.573C>T	p.Gly191Gly	synonymous_variant	LOW	48	0	0.023	74	42	0.567	6.26017
Aplan-CEM-ATC25-C1_vs_Aplan-CEM-PreTreatment	chr1	113981328	113981328	G	C	OLFML3	c.780G>C	p.Glu260Asp	missense_variant	MODERATE	76	0	0.014	123	28	0.234	6.11977
Aplan-CEM-ATC25-C1_vs_Aplan-CEM-PreTreatment	chr1	114433674	114433674	G	A	TRIM33	c.983C>T	p.Ala328Val	missense_variant	MODERATE	21	0	0.059	34	13	0.4	3.10632
Aplan-CEM-ATC25-C1_vs_Aplan-CEM-PreTreatment	chr1	114716126	114716126	C	A	NRAS	c.35G>T	p.Gly12Val	missense_variant	MODERATE	29	0	0.038	29	14	0.5	4.8155
Aplan-CEM-ATC25-C1_vs_Aplan-CEM-PreTreatment	chr1	116949500	116949500	G	C	PTGFRN	c.1141G>C	p.Gly381Arg	missense_variant	MODERATE	54	0	0.02	100	31	0.353	6.02357
Aplan-CEM-ATC25-C1_vs_Aplan-CEM-PreTreatment	chr1	118931780	118931780	G	C	TBX15	c.258C>G	p.Ser86Ser	synonymous_variant	LOW	46	0	0.024	84	25	0.294	5.05246
Aplan-CEM-ATC25-C1_vs_Aplan-CEM-PreTreatment	chr1	145904152	145904152	C	A	ITGA10	c.658G>T	p.Gly220*	stop_gained	HIGH	39	0	0.032	51	28	0.524	6.17143
Aplan-CEM-ATC25-C1_vs_Aplan-CEM-PreTreatment	chr1	147167807	147167807	A	G	PRKAB2	c.283T>C	p.S95P	structural_interaction_variant	HIGH	52	0	0.021	76	17	0.212	4.07448
Aplan-CEM-ATC25-C1_vs_Aplan-CEM-PreTreatment	chr1	147619890	147619890	C	G	BCL9	c.1735C>G	p.Pro579Ala	missense_variant	MODERATE	84	0	0.014	93	24	0.265	6.90492
Aplan-CEM-ATC25-C1_vs_Aplan-CEM-PreTreatment	chr1	149923669	149923669	T	TG	SF3B4	c.1147dupC	p.His383fs	frameshift_variant	HIGH	54	0	0.02	73	14	0.219	3.53307
Aplan-CEM-ATC25-C1_vs_Aplan-CEM-PreTreatment	chr1	150283270	150283270	G	A	CIART	c.3G>A	p.Met1?	start_lost	HIGH	46	0	0.022	44	25	0.581	6.05177
Aplan-CEM-ATC25-C1_vs_Aplan-CEM-PreTreatment	chr1	150986423	150986423	G	C	ANXA9	c.552+8G>C		splice_region_variant&intron_variant	LOW	31	0	0.038	37	9	0.274	2.53261
Aplan-CEM-ATC25-C1_vs_Aplan-CEM-PreTreatment	chr1	150988287	150988287	G	C	ANXA9	c.798G>C	p.Ser266Ser	synonymous_variant	LOW	80	0	0.013	97	18	0.212	4.83748
Aplan-CEM-ATC25-C1_vs_Aplan-CEM-PreTreatment	chr1	150998085	150998085	G	C	FAM63A	c.1314C>G	p.Asp438Glu	missense_variant	MODERATE	59	0	0.018	50	12	0.25	4.41183
Aplan-CEM-ATC25-C1_vs_Aplan-CEM-PreTreatment	chr1	150998251	150998251	G	C	FAM63A	c.1148C>G	p.Thr383Ser	missense_variant	MODERATE	36	0	0.029	57	20	0.347	4.85748
Aplan-CEM-ATC25-C1_vs_Aplan-CEM-PreTreatment	chr1	151002241	151002241	G	C	FAM63A	c.521C>G	p.Thr174Arg	missense_variant	MODERATE	69	0	0.016	82	21	0.253	5.9684
Aplan-CEM-ATC25-C1_vs_Aplan-CEM-PreTreatment	chr1	151158977	151158977	C	T	TNFAIP8L2	c.280C>T	p.Leu94Leu	synonymous_variant	LOW	89	0	0.013	97	27	0.267	6.55358
Aplan-CEM-ATC25-C1_vs_Aplan-CEM-PreTreatment	chr1	151232695	151232695	T	C	PIP5K1A	c.631T>C	p.Tyr211His	missense_variant	MODERATE	47	0	0.024	44	8	0.225	2.68081
Aplan-CEM-ATC25-C1_vs_Aplan-CEM-PreTreatment	chr1	151343756	151343756	G	C	RFX5	c.682C>G	p.Arg228Gly	missense_variant	MODERATE	55	0	0.019	62	13	0.236	3.80228
Aplan-CEM-ATC25-C1_vs_Aplan-CEM-PreTreatment	chr1	151366445	151366445	C	T	SELENBP1	c.799G>A	p.Gly267Arg	missense_variant	MODERATE	53	0	0.021	69	21	0.323	5.5611
Aplan-CEM-ATC25-C1_vs_Aplan-CEM-PreTreatment	chr1	152350844	152350844	T	C	FLG2	c.6942A>G	p.Gln2314Gln	synonymous_variant	LOW	95	0	0.011	155	84	0.527	5.989
Aplan-CEM-ATC25-C1_vs_Aplan-CEM-PreTreatment	chr1	153941894	153941894	C	A	DENND4B	c.1030G>T	p.Gly344Cys	missense_variant	MODERATE	64	0	0.016	103	26	0.239	5.53941
Aplan-CEM-ATC25-C1_vs_Aplan-CEM-PreTreatment	chr1	154023147	154023147	T	C	NUP210L	c.4273A>G	p.Thr1425Ala	missense_variant	MODERATE	37	0	0.029	49	15	0.289	4.06301
Aplan-CEM-ATC25-C1_vs_Aplan-CEM-PreTreatment	chr1	154200583	154200583	C	T	C1orf189	c.80G>A	p.Arg27Gln	missense_variant	MODERATE	36	0	0.028	53	19	0.342	4.9357
Aplan-CEM-ATC25-C1_vs_Aplan-CEM-PreTreatment	chr1	154571794	154571794	G	C	CHRNB2	c.971G>C	p.Arg324Pro	missense_variant	MODERATE	78	0	0.014	100	29	0.303	6.21376
Aplan-CEM-ATC25-C1_vs_Aplan-CEM-PreTreatment	chr1	155066885	155066886	GC	G	EFNA4	c.274delC	p.Arg92fs	frameshift_variant	HIGH	63	1	0.036	86	38	0.456	5.9116
Aplan-CEM-ATC25-C1_vs_Aplan-CEM-PreTreatment	chr1	155187355	155187355	C	T	MUC1	c.3584G>A	p.Arg1195Gln	missense_variant	MODERATE	120	0	0.009861	167	42	0.255	5.66645
Aplan-CEM-ATC25-C1_vs_Aplan-CEM-PreTreatment	chr1	155196053	155196053	G	A	THBS3	c.2746C>T	p.Arg916Cys	missense_variant	MODERATE	51	0	0.022	92	29	0.301	5.88582
Aplan-CEM-ATC25-C1_vs_Aplan-CEM-PreTreatment	chr1	155205275	155205275	C	T	THBS3	c.328G>A	p.Val110Met	missense_variant	MODERATE	71	0	0.015	108	29	0.263	6.43287
Aplan-CEM-ATC25-C1_vs_Aplan-CEM-PreTreatment	chr1	155212561	155212561	G	A	MTX1	c.948G>A	p.Glu316Glu	synonymous_variant	LOW	41	0	0.025	76	16	0.242	2.95538
Aplan-CEM-ATC25-C1_vs_Aplan-CEM-PreTreatment	chr1	155322404	155322404	G	A	RUSC1	c.631G>A	p.Glu211Lys	missense_variant	MODERATE	74	0	0.014	102	27	0.274	6.05737
Aplan-CEM-ATC25-C1_vs_Aplan-CEM-PreTreatment	chr1	155325138	155325138	T	C	RUSC1	c.1493T>C	p.Ile498Thr	missense_variant	MODERATE	85	0	0.013	114	30	0.284	5.89202
Aplan-CEM-ATC25-C1_vs_Aplan-CEM-PreTreatment	chr1	155611232	155611232	A	G	MSTO1	c.307A>G	p.Thr103Ala	missense_variant	MODERATE	50	0	0.021	72	17	0.254	4.11553
Aplan-CEM-ATC25-C1_vs_Aplan-CEM-PreTreatment	chr1	155933626	155933626	C	T	KIAA0907	c.255+7G>A		splice_region_variant&intron_variant	LOW	28	0	0.035	41	9	0.228	2.06791
Aplan-CEM-ATC25-C1_vs_Aplan-CEM-PreTreatment	chr1	155951049	155951049	C	T	ARHGEF2	c.2618G>A	p.Arg873Gln	missense_variant	MODERATE	64	0	0.017	87	21	0.243	5.37482
Aplan-CEM-ATC25-C1_vs_Aplan-CEM-PreTreatment	chr1	155951747	155951747	C	G	ARHGEF2	c.2337G>C	p.Pro779Pro	synonymous_variant	LOW	55	0	0.019	82	15	0.211	3.40848
Aplan-CEM-ATC25-C1_vs_Aplan-CEM-PreTreatment	chr1	155965632	155965632	C	T	ARHGEF2	c.604G>A	p.Gly202Arg	missense_variant&splice_region_variant	MODERATE	94	0	0.012	99	48	0.488	5.74641
Aplan-CEM-ATC25-C1_vs_Aplan-CEM-PreTreatment	chr1	156244831	156244831	C	T	PAQR6	c.747G>A	p.Ala249Ala	synonymous_variant	LOW	55	0	0.019	92	42	0.5	5.93333
Aplan-CEM-ATC25-C1_vs_Aplan-CEM-PreTreatment	chr1	156245874	156245874	G	C	PAQR6	c.477C>G	p.Val159Val	synonymous_variant	LOW	74	1	0.016	92	17	0.206	3.59273
Aplan-CEM-ATC25-C1_vs_Aplan-CEM-PreTreatment	chr1	156285875	156285875	G	A	TMEM79	c.649G>A	p.Gly217Arg	missense_variant	MODERATE	90	0	0.012	100	53	0.541	5.76578
Aplan-CEM-ATC25-C1_vs_Aplan-CEM-PreTreatment	chr1	156845101	156845101	G	C	INSRR	c.2412C>G	p.Phe804Leu	missense_variant	MODERATE	59	0	0.018	81	20	0.246	5.07822
Aplan-CEM-ATC25-C1_vs_Aplan-CEM-PreTreatment	chr1	158465629	158465629	T	C	OR10K1	c.68T>C	p.Leu23Pro	missense_variant	MODERATE	67	0	0.017	78	35	0.458	5.86214
Aplan-CEM-ATC25-C1_vs_Aplan-CEM-PreTreatment	chr1	158579293	158579293	G	A	OR10X1	c.607C>T	p.Leu203Leu	synonymous_variant	LOW	40	0	0.028	90	17	0.205	2.82701
Aplan-CEM-ATC25-C1_vs_Aplan-CEM-PreTreatment	chr1	159713744	159713744	G	A	CRP	c.456C>T	p.Ile152Ile	synonymous_variant	LOW	77	0	0.014	114	39	0.33	6.03489
Aplan-CEM-ATC25-C1_vs_Aplan-CEM-PreTreatment	chr1	159943123	159943123	C	T	IGSF9	c.87G>A	p.Val29Val	synonymous_variant	LOW	48	0	0.021	64	12	0.203	2.96388
Aplan-CEM-ATC25-C1_vs_Aplan-CEM-PreTreatment	chr1	160565576	160565576	G	T	CD84	c.216C>A	p.Pro72Pro	synonymous_variant	LOW	51	0	0.022	89	19	0.23	3.83503
Aplan-CEM-ATC25-C1_vs_Aplan-CEM-PreTreatment	chr1	161051315	161051316	TG	T	ARHGAP30	c.1418delC	p.Pro473fs	frameshift_variant&splice_region_variant	HIGH	84	0	0.013	129	33	0.274	6.0079
Aplan-CEM-ATC25-C1_vs_Aplan-CEM-PreTreatment	chr1	161098744	161098744	G	C	KLHDC9	c.209G>C	p.Arg70Pro	missense_variant	MODERATE	76	0	0.015	101	32	0.319	6.03876
Aplan-CEM-ATC25-C1_vs_Aplan-CEM-PreTreatment	chr1	161160672	161160672	G	C	USP21	c.32G>C	p.Arg11Pro	missense_variant	MODERATE	37	0	0.029	73	16	0.254	2.96734
Aplan-CEM-ATC25-C1_vs_Aplan-CEM-PreTreatment	chr1	161168576	161168576	G	C	PPOX	c.616G>C	p.Gly206Arg	missense_variant&splice_region_variant	MODERATE	42	0	0.024	91	22	0.244	3.95801
Aplan-CEM-ATC25-C1_vs_Aplan-CEM-PreTreatment	chr1	161173869	161173869	A	G	B4GALT3	c.670T>C	p.Phe224Leu	missense_variant	MODERATE	68	0	0.017	91	21	0.219	5.35775
Aplan-CEM-ATC25-C1_vs_Aplan-CEM-PreTreatment	chr1	161191440	161191440	G	C	ADAMTS4	c.2212C>G	p.Leu738Val	missense_variant	MODERATE	73	0	0.015	104	23	0.213	5.45711
Aplan-CEM-ATC25-C1_vs_Aplan-CEM-PreTreatment	chr1	161195638	161195638	G	A	ADAMTS4	c.1091-3C>T		splice_region_variant&intron_variant	LOW	41	0	0.026	43	9	0.23	2.60494
Aplan-CEM-ATC25-C1_vs_Aplan-CEM-PreTreatment	chr1	166849082	166849082	A	G	POGK	c.503A>G	p.Tyr168Cys	missense_variant	MODERATE	52	0	0.02	81	24	0.296	5.55981
Aplan-CEM-ATC25-C1_vs_Aplan-CEM-PreTreatment	chr1	166992674	166992675	AT	A	MAEL	c.326-3delT		splice_region_variant&intron_variant	LOW	23	0	0.047	33	24	0.668	6.00121
Aplan-CEM-ATC25-C1_vs_Aplan-CEM-PreTreatment	chr1	167094921	167094921	G	C	DUSP27	c.72G>C	p.Ala24Ala	synonymous_variant	LOW	40	0	0.029	54	11	0.204	2.68133
Aplan-CEM-ATC25-C1_vs_Aplan-CEM-PreTreatment	chr1	168196582	168196583	GT	G	TIPRL	c.557delT	p.Phe186fs	frameshift_variant	HIGH	25	0	0.039	57	14	0.255	2.38193
Aplan-CEM-ATC25-C1_vs_Aplan-CEM-PreTreatment	chr1	169530789	169530789	G	C	F5	c.5220C>G	p.Asn1740Lys	missense_variant	MODERATE	40	0	0.027	44	11	0.256	3.26973
Aplan-CEM-ATC25-C1_vs_Aplan-CEM-PreTreatment	chr1	169586342	169586342	G	A	F5	c.45C>T	p.Gly15Gly	synonymous_variant	LOW	67	0	0.018	68	40	0.559	5.87403
Aplan-CEM-ATC25-C1_vs_Aplan-CEM-PreTreatment	chr1	171185853	171185853	A	C	FMO2	c.132+8A>C		splice_region_variant&intron_variant	LOW	33	0	0.04	51	18	0.349	4.27019
Aplan-CEM-ATC25-C1_vs_Aplan-CEM-PreTreatment	chr1	171334688	171334688	G	C	FMO4	c.1105G>C	p.Gly369Arg	missense_variant	MODERATE	17	0	0.065	46	15	0.309	2.20134
Aplan-CEM-ATC25-C1_vs_Aplan-CEM-PreTreatment	chr1	172557340	172557340	A	G	SUCO	c.978A>G	p.Glu326Glu	synonymous_variant	LOW	50	0	0.024	71	16	0.234	3.79794
Aplan-CEM-ATC25-C1_vs_Aplan-CEM-PreTreatment	chr1	173831541	173831541	C	T	DARS2	c.403C>T	p.Pro135Ser	missense_variant	MODERATE	21	0	0.056	22	12	0.526	4.21239
Aplan-CEM-ATC25-C1_vs_Aplan-CEM-PreTreatment	chr1	178886091	178886091	G	C	RALGPS2	c.1163G>C	p.Ser388Thr	missense_variant	MODERATE	45	0	0.026	74	15	0.22	3.30859
Aplan-CEM-ATC25-C1_vs_Aplan-CEM-PreTreatment	chr1	179109425	179109425	T	C	ABL2	c.1842A>G	p.Ala614Ala	synonymous_variant	LOW	51	0	0.021	82	38	0.474	6.5464
Aplan-CEM-ATC25-C1_vs_Aplan-CEM-PreTreatment	chr1	179630909	179630909	C	G	TDRD5	c.1115C>G	p.Pro372Arg	missense_variant	MODERATE	29	0	0.036	81	18	0.239	2.52477
Aplan-CEM-ATC25-C1_vs_Aplan-CEM-PreTreatment	chr1	180065235	180065235	C	T	CEP350	c.5530C>T	p.Gln1844*	stop_gained	HIGH	67	0	0.017	90	44	0.52	6.22176
Aplan-CEM-ATC25-C1_vs_Aplan-CEM-PreTreatment	chr1	180873842	180873842	C	T	XPR1	c.1708C>T	p.Arg570Cys	missense_variant	MODERATE	58	0	0.019	65	18	0.313	5.50924
Aplan-CEM-ATC25-C1_vs_Aplan-CEM-PreTreatment	chr1	180916280	180916280	C	G	KIAA1614	c.177C>G	p.Asn59Lys	missense_variant	MODERATE	56	0	0.02	66	17	0.279	4.6801
Aplan-CEM-ATC25-C1_vs_Aplan-CEM-PreTreatment	chr1	180928504	180928504	G	C	KIAA1614	c.1136G>C	p.Arg379Pro	missense_variant	MODERATE	58	1	0.02	78	29	0.369	6.35805
Aplan-CEM-ATC25-C1_vs_Aplan-CEM-PreTreatment	chr1	180941209	180941209	G	A	KIAA1614	c.3083G>A	p.Ser1028Asn	missense_variant	MODERATE	55	0	0.02	68	15	0.21	3.96987
Aplan-CEM-ATC25-C1_vs_Aplan-CEM-PreTreatment	chr1	182056504	182056504	C	T	ZNF648	c.1507G>A	p.Gly503Arg	missense_variant	MODERATE	70	0	0.015	98	24	0.227	5.82874
Aplan-CEM-ATC25-C1_vs_Aplan-CEM-PreTreatment	chr1	182399982	182399982	G	A	TEDDM1	c.504C>T	p.Gly168Gly	synonymous_variant	LOW	74	0	0.015	86	33	0.36	6.03661
Aplan-CEM-ATC25-C1_vs_Aplan-CEM-PreTreatment	chr1	183136465	183136465	C	G	LAMC1	c.4194C>G	p.Ile1398Met	missense_variant	MODERATE	43	0	0.026	49	12	0.256	3.52788
Aplan-CEM-ATC25-C1_vs_Aplan-CEM-PreTreatment	chr1	183136518	183136518	C	A	LAMC1	c.4247C>A	p.Ala1416Glu	missense_variant	MODERATE	43	0	0.024	53	11	0.244	3.03173
Aplan-CEM-ATC25-C1_vs_Aplan-CEM-PreTreatment	chr1	183883801	183883801	C	G	RGL1	c.731C>G	p.Thr244Arg	missense_variant	MODERATE	35	0	0.033	62	14	0.235	2.77889
Aplan-CEM-ATC25-C1_vs_Aplan-CEM-PreTreatment	chr1	186088720	186088721	GA	G	HMCN1	c.9696delA	p.Ala3233fs	frameshift_variant	HIGH	25	0	0.04	46	24	0.513	5.62238
Aplan-CEM-ATC25-C1_vs_Aplan-CEM-PreTreatment	chr1	186094307	186094307	G	C	HMCN1	c.10228G>C	p.Val3410Leu	missense_variant	MODERATE	20	0	0.05	54	16	0.318	2.4055
Aplan-CEM-ATC25-C1_vs_Aplan-CEM-PreTreatment	chr1	186314649	186314649	C	T	TPR	c.7016G>A	p.Arg2339His	missense_variant	MODERATE	28	0	0.043	43	11	0.243	2.6064
Aplan-CEM-ATC25-C1_vs_Aplan-CEM-PreTreatment	chr1	192811063	192811063	C	CA	RGS2	c.364dupA	p.Thr122fs	frameshift_variant	HIGH	36	0	0.035	44	12	0.305	3.4308
Aplan-CEM-ATC25-C1_vs_Aplan-CEM-PreTreatment	chr1	196958042	196958042	C	T	RP4-608O15.3	c.582C>T	p.Asn194Asn	synonymous_variant	LOW	62	0	0.017	116	37	0.307	5.94253
Aplan-CEM-ATC25-C1_vs_Aplan-CEM-PreTreatment	chr1	197060390	197060390	A	G	F13B	c.781T>C	p.Tyr261His	missense_variant	MODERATE	21	0	0.044	38	18	0.441	4.1815
Aplan-CEM-ATC25-C1_vs_Aplan-CEM-PreTreatment	chr1	200602075	200602076	GA	G	KIF14	c.1980-8delT		splice_region_variant&intron_variant	LOW	27	0	0.034	43	18	0.421	4.44371
Aplan-CEM-ATC25-C1_vs_Aplan-CEM-PreTreatment	chr1	200856059	200856059	A	G	CAMSAP2	c.3979A>G	p.Asn1327Asp	missense_variant	MODERATE	22	0	0.053	31	18	0.556	5.42694
Aplan-CEM-ATC25-C1_vs_Aplan-CEM-PreTreatment	chr1	201359211	201359211	T	C	TNNT2	c.896A>G	p.Ter299Trpext*?	stop_lost	HIGH	34	0	0.031	58	30	0.49	5.83197
Aplan-CEM-ATC25-C1_vs_Aplan-CEM-PreTreatment	chr1	201848440	201848440	G	A	IPO9	c.360G>A	p.Ser120Ser	synonymous_variant	LOW	41	0	0.028	58	14	0.235	3.53057
Aplan-CEM-ATC25-C1_vs_Aplan-CEM-PreTreatment	chr1	201870602	201870602	G	A	IPO9	c.2153G>A	p.Arg718Gln	missense_variant	MODERATE	61	0	0.018	64	35	0.525	5.98935
Aplan-CEM-ATC25-C1_vs_Aplan-CEM-PreTreatment	chr1	201946177	201946177	G	C	LMOD1	c.164C>G	p.Thr55Arg	missense_variant	MODERATE	42	0	0.025	76	19	0.281	3.8983
Aplan-CEM-ATC25-C1_vs_Aplan-CEM-PreTreatment	chr1	202011280	202011280	G	C	ELF3	c.144G>C	p.Gln48His	missense_variant	MODERATE	58	0	0.02	102	19	0.202	3.77658
Aplan-CEM-ATC25-C1_vs_Aplan-CEM-PreTreatment	chr1	203165259	203165259	A	G	ADORA1	c.342-2A>G		splice_acceptor_variant&intron_variant	HIGH	59	0	0.02	89	19	0.234	4.52974
Aplan-CEM-ATC25-C1_vs_Aplan-CEM-PreTreatment	chr1	203307417	203307417	C	G	BTG2	c.456C>G	p.Tyr152*	stop_gained	HIGH	52	0	0.021	55	16	0.288	5.0338
Aplan-CEM-ATC25-C1_vs_Aplan-CEM-PreTreatment	chr1	203347496	203347496	C	G	FMOD	c.775G>C	p.Val259Leu	missense_variant	MODERATE	57	0	0.018	77	17	0.246	4.42006
Aplan-CEM-ATC25-C1_vs_Aplan-CEM-PreTreatment	chr1	204257461	204257461	G	T	PLEKHA6	c.1416C>A	p.Ser472Ser	synonymous_variant	LOW	29	0	0.038	74	33	0.455	5.61922
Aplan-CEM-ATC25-C1_vs_Aplan-CEM-PreTreatment	chr1	204444397	204444397	C	G	PIK3C2B	c.2706G>C	p.Met902Ile	missense_variant	MODERATE	29	0	0.037	34	9	0.273	2.57851
Aplan-CEM-ATC25-C1_vs_Aplan-CEM-PreTreatment	chr1	204954330	204954330	G	C	NFASC	c.358G>C	p.Ala120Pro	missense_variant	MODERATE	41	0	0.026	74	20	0.246	4.2098
Aplan-CEM-ATC25-C1_vs_Aplan-CEM-PreTreatment	chr1	204973277	204973277	G	C	NFASC	c.1137G>C	p.Ser379Ser	splice_region_variant&synonymous_variant	LOW	41	0	0.027	47	10	0.25	2.85525
Aplan-CEM-ATC25-C1_vs_Aplan-CEM-PreTreatment	chr1	205073191	205073191	G	C	CNTN2	c.2968G>C	p.Gly990Arg	missense_variant	MODERATE	45	0	0.026	92	21	0.23	3.70735
Aplan-CEM-ATC25-C1_vs_Aplan-CEM-PreTreatment	chr1	205160224	205160224	C	A	DSTYK	c.1995G>T	p.Val665Val	synonymous_variant	LOW	35	0	0.031	74	28	0.339	5.51322
Aplan-CEM-ATC25-C1_vs_Aplan-CEM-PreTreatment	chr1	205321608	205321608	C	G	NUAK2	c.153G>C	p.Ala51Ala	synonymous_variant	LOW	28	0	0.04	49	16	0.312	3.52439
Aplan-CEM-ATC25-C1_vs_Aplan-CEM-PreTreatment	chr1	206116368	206116368	G	C	AVPR1B	c.523C>G	p.Arg175Gly	missense_variant	MODERATE	89	0	0.012	124	34	0.274	6.09637
Aplan-CEM-ATC25-C1_vs_Aplan-CEM-PreTreatment	chr1	206931747	206931747	G	C	PIGR	c.2064C>G	p.Asn688Lys	missense_variant	MODERATE	37	0	0.028	62	14	0.236	3.0638
Aplan-CEM-ATC25-C1_vs_Aplan-CEM-PreTreatment	chr1	207578142	207578142	C	T	CR1	c.4875C>T	p.Pro1625Pro	synonymous_variant	LOW	243	0	0.004664	335	72	0.227	5.81695
Aplan-CEM-ATC25-C1_vs_Aplan-CEM-PreTreatment	chr1	210239553	210239553	G	T	SERTAD4	c.236G>T	p.Arg79Met	missense_variant	MODERATE	19	0	0.056	41	21	0.485	4.16289
Aplan-CEM-ATC25-C1_vs_Aplan-CEM-PreTreatment	chr1	211578599	211578599	C	G	SLC30A1	c.14G>C	p.Gly5Ala	missense_variant	MODERATE	40	0	0.026	34	10	0.312	3.73867
Aplan-CEM-ATC25-C1_vs_Aplan-CEM-PreTreatment	chr1	214369525	214369525	G	C	PTPN14	c.3203C>G	p.Thr1068Arg	missense_variant	MODERATE	53	0	0.021	60	12	0.226	3.47216
Aplan-CEM-ATC25-C1_vs_Aplan-CEM-PreTreatment	chr1	214383884	214383884	C	T	PTPN14	c.1971G>A	p.Thr657Thr	synonymous_variant	LOW	100	0	0.012	152	49	0.304	5.92936
Aplan-CEM-ATC25-C1_vs_Aplan-CEM-PreTreatment	chr1	214451938	214451938	G	A	PTPN14	c.211C>T	p.Gln71*	stop_gained	HIGH	57	0	0.019	72	17	0.25	4.59814
Aplan-CEM-ATC25-C1_vs_Aplan-CEM-PreTreatment	chr1	216246816	216246816	G	A	USH2A	c.2578C>T	p.Leu860Leu	synonymous_variant	LOW	62	0	0.018	96	46	0.494	5.75976
Aplan-CEM-ATC25-C1_vs_Aplan-CEM-PreTreatment	chr1	220796743	220796743	G	C	2022-03-01	c.550G>C	p.Glu184Gln	missense_variant	MODERATE	47	0	0.021	78	17	0.22	3.64213
Aplan-CEM-ATC25-C1_vs_Aplan-CEM-PreTreatment	chr1	221739385	221739385	A	G	DUSP10	c.360T>C	p.Asn120Asn	synonymous_variant	LOW	73	0	0.015	104	29	0.274	5.78221
Aplan-CEM-ATC25-C1_vs_Aplan-CEM-PreTreatment	chr1	223394466	223394466	C	G	CCDC185	c.991C>G	p.Arg331Gly	missense_variant	MODERATE	77	0	0.014	152	47	0.283	6.3236
Aplan-CEM-ATC25-C1_vs_Aplan-CEM-PreTreatment	chr1	226735931	226735931	G	A	ITPKB	c.1528C>T	p.Gln510*	stop_gained	HIGH	60	0	0.017	88	43	0.501	6.04568
Aplan-CEM-ATC25-C1_vs_Aplan-CEM-PreTreatment	chr1	228212141	228212141	C	G	OBSCN	c.358C>G	p.Arg120Gly	missense_variant	MODERATE	33	0	0.031	73	15	0.242	2.32342
Aplan-CEM-ATC25-C1_vs_Aplan-CEM-PreTreatment	chr1	228212373	228212373	C	T	OBSCN	c.590C>T	p.Ala197Val	missense_variant	MODERATE	17	0	0.053	27	18	0.63	5.30587
Aplan-CEM-ATC25-C1_vs_Aplan-CEM-PreTreatment	chr1	228214304	228214304	G	C	OBSCN	c.1389G>C	p.Gly463Gly	synonymous_variant	LOW	36	0	0.028	103	31	0.309	4.45652
Aplan-CEM-ATC25-C1_vs_Aplan-CEM-PreTreatment	chr1	228283592	228283592	G	T	OBSCN	c.10114G>T	p.Ala3372Ser	missense_variant	MODERATE	54	0	0.019	77	21	0.282	5.3598
Aplan-CEM-ATC25-C1_vs_Aplan-CEM-PreTreatment	chr1	228286139	228286139	C	G	OBSCN	c.10353C>G	p.Ala3451Ala	synonymous_variant	LOW	47	0	0.023	54	17	0.326	5.20482
Aplan-CEM-ATC25-C1_vs_Aplan-CEM-PreTreatment	chr1	228292096	228292096	C	G	OBSCN	c.11825C>G	p.Ala3942Gly	missense_variant	MODERATE	50	0	0.022	94	24	0.251	4.63273
Aplan-CEM-ATC25-C1_vs_Aplan-CEM-PreTreatment	chr1	228298663	228298663	G	A	OBSCN	c.13156G>A	p.Glu4386Lys	missense_variant	MODERATE	44	0	0.025	77	45	0.561	5.82898
Aplan-CEM-ATC25-C1_vs_Aplan-CEM-PreTreatment	chr1	228299464	228299464	C	G	OBSCN	c.13416C>G	p.Asn4472Lys	missense_variant	MODERATE	50	0	0.022	80	16	0.219	3.60597
Aplan-CEM-ATC25-C1_vs_Aplan-CEM-PreTreatment	chr1	228306897	228306897	G	C	OBSCN	c.14798-4G>C		splice_region_variant&intron_variant	LOW	35	0	0.028	55	20	0.306	4.90735
Aplan-CEM-ATC25-C1_vs_Aplan-CEM-PreTreatment	chr1	228308307	228308307	C	A	OBSCN	c.15534C>A	p.Gly5178Gly	synonymous_variant	LOW	41	0	0.026	78	16	0.217	2.95391
Aplan-CEM-ATC25-C1_vs_Aplan-CEM-PreTreatment	chr1	228316908	228316908	C	G	OBSCN	c.16356C>G	p.Ser5452Arg	missense_variant	MODERATE	50	0	0.023	68	14	0.229	3.54631
Aplan-CEM-ATC25-C1_vs_Aplan-CEM-PreTreatment	chr1	228374744	228374744	G	C	OBSCN	c.25526G>C	p.Arg8509Pro	missense_variant	MODERATE	38	0	0.028	71	15	0.224	2.97177
Aplan-CEM-ATC25-C1_vs_Aplan-CEM-PreTreatment	chr1	228425109	228425109	G	A	HIST3H3	c.217C>T	p.Arg73Cys	missense_variant	MODERATE	113	0	0.009959	167	41	0.244	5.88262
Aplan-CEM-ATC25-C1_vs_Aplan-CEM-PreTreatment	chr1	230279422	230279422	G	C	GALNT2	c.1680G>C	p.S560S	structural_interaction_variant	HIGH	47	0	0.023	90	25	0.274	4.99866
Aplan-CEM-ATC25-C1_vs_Aplan-CEM-PreTreatment	chr1	231693823	231693823	C	G	TSNAX-DISC1	c.496-3C>G		splice_region_variant&intron_variant	LOW	55	0	0.019	95	23	0.238	4.99083
Aplan-CEM-ATC25-C1_vs_Aplan-CEM-PreTreatment	chr1	231694006	231694006	C	G	DISC1	c.248C>G	p.Ala83Gly	missense_variant	MODERATE	63	0	0.017	108	28	0.27	5.78571
Aplan-CEM-ATC25-C1_vs_Aplan-CEM-PreTreatment	chr1	231694102	231694102	C	A	DISC1	c.344C>A	p.Ser115*	stop_gained	HIGH	78	0	0.013	125	30	0.245	6.13777
Aplan-CEM-ATC25-C1_vs_Aplan-CEM-PreTreatment	chr1	234478545	234478545	C	G	TARBP1	c.559G>C	p.Ala187Pro	missense_variant	MODERATE	55	0	0.02	83	20	0.233	4.60811
Aplan-CEM-ATC25-C1_vs_Aplan-CEM-PreTreatment	chr1	235979853	235979853	C	T	NID1	c.3478G>A	p.Gly1160Arg	missense_variant	MODERATE	39	0	0.027	49	13	0.262	3.41444
Aplan-CEM-ATC25-C1_vs_Aplan-CEM-PreTreatment	chr1	236142844	236142844	G	C	GPR137B	c.222G>C	p.Arg74Arg	synonymous_variant	LOW	32	0	0.033	42	11	0.264	2.76873
Aplan-CEM-ATC25-C1_vs_Aplan-CEM-PreTreatment	chr1	237610840	237610840	G	C	RYR2	c.4762G>C	p.Val1588Leu	missense_variant	MODERATE	37	0	0.029	62	16	0.259	3.42981
Aplan-CEM-ATC25-C1_vs_Aplan-CEM-PreTreatment	chr1	240208421	240208421	T	G	FMN2	c.3609T>G	p.Gly1203Gly	synonymous_variant	LOW	31	0	0.033	59	27	0.465	5.93794
Aplan-CEM-ATC25-C1_vs_Aplan-CEM-PreTreatment	chr1	246876986	246876986	G	C	AHCTF1	c.3006C>G	p.Ala1002Ala	synonymous_variant	LOW	60	0	0.019	84	27	0.351	6.35839
Aplan-CEM-ATC25-C1_vs_Aplan-CEM-PreTreatment	chr1	247424010	247424010	C	A	NLRP3	c.567C>A	p.Ala189Ala	synonymous_variant	LOW	58	0	0.018	111	22	0.213	4.25143
Aplan-CEM-ATC25-C1_vs_Aplan-CEM-PreTreatment	chr1	248145634	248145634	A	T	OR2M5	c.487A>T	p.Thr163Ser	missense_variant	MODERATE	99	0	0.011	200	55	0.267	5.6633
Aplan-CEM-ATC25-C1_vs_Aplan-CEM-PreTreatment	chr1	248323869	248323869	G	C	OR2M7	c.700C>G	p.Arg234Gly	missense_variant	MODERATE	107	0	0.011	167	43	0.246	6.14145
Aplan-CEM-ATC25-C1_vs_Aplan-CEM-PreTreatment	chr1	248857417	248857417	G	C	ZNF692	c.307C>G	p.Pro103Ala	missense_variant	MODERATE	64	0	0.016	87	21	0.233	5.37482
Aplan-CEM-ATC25-C1_vs_Aplan-CEM-PreTreatment	chr2	1649600	1649600	C	A	PXDN	c.2180G>T	p.Arg727Leu	missense_variant	MODERATE	70	0	0.017	76	13	0.203	3.80192
Aplan-CEM-ATC25-C1_vs_Aplan-CEM-PreTreatment	chr2	5692771	5692771	A	T	SOX11	c.50A>T	p.Glu17Val	missense_variant	MODERATE	15	0	0.067	41	16	0.405	2.54901
Aplan-CEM-ATC25-C1_vs_Aplan-CEM-PreTreatment	chr2	8731381	8731383	ACT	A	KIDINS220	c.4653_4654delAG	p.Arg1551fs	frameshift_variant	HIGH	74	0	0.015	96	46	0.473	5.80374
Aplan-CEM-ATC25-C1_vs_Aplan-CEM-PreTreatment	chr2	10600932	10600932	T	C	NOL10	c.1343A>G	p.Lys448Arg	missense_variant	MODERATE	28	0	0.044	23	7	0.304	2.67417
Aplan-CEM-ATC25-C1_vs_Aplan-CEM-PreTreatment	chr2	11621000	11621000	C	T	GREB1	c.4140C>T	p.Ile1380Ile	synonymous_variant	LOW	15	0	0.077	24	10	0.417	2.21665
Aplan-CEM-ATC25-C1_vs_Aplan-CEM-PreTreatment	chr2	26314595	26314595	C	A	ADGRF3	c.951G>T	p.Gln317His	missense_variant	MODERATE	37	0	0.029	62	29	0.474	6.21148
Aplan-CEM-ATC25-C1_vs_Aplan-CEM-PreTreatment	chr2	26728460	26728460	A	G	KCNK3	c.1077A>G	p.Arg359Arg	synonymous_variant	LOW	41	0	0.026	70	25	0.355	5.67244
Aplan-CEM-ATC25-C1_vs_Aplan-CEM-PreTreatment	chr2	27306324	27306324	C	T	TRIM54	c.1104C>T	p.Ile368Ile	synonymous_variant	LOW	79	0	0.014	84	44	0.532	5.90048
Aplan-CEM-ATC25-C1_vs_Aplan-CEM-PreTreatment	chr2	27453439	27453439	T	C	IFT172	c.3896A>G	p.Tyr1299Cys	missense_variant	MODERATE	48	0	0.022	78	37	0.449	6.29487
Aplan-CEM-ATC25-C1_vs_Aplan-CEM-PreTreatment	chr2	29222559	29222559	G	C	ALK	c.3408C>G	p.S1136S	structural_interaction_variant	HIGH	33	0	0.031	52	12	0.29	2.58826
Aplan-CEM-ATC25-C1_vs_Aplan-CEM-PreTreatment	chr2	33347498	33347498	C	G	LTBP1	c.3988C>G	p.Arg1330Gly	missense_variant	MODERATE	34	0	0.029	69	25	0.328	4.92071
Aplan-CEM-ATC25-C1_vs_Aplan-CEM-PreTreatment	chr2	37107531	37107532	GA	G	EIF2AK2	c.1480-5delT		splice_region_variant&intron_variant	LOW	31	0	0.037	51	22	0.446	5.38248
Aplan-CEM-ATC25-C1_vs_Aplan-CEM-PreTreatment	chr2	38666170	38666170	G	A	GALM	c.9G>A	p.S3S	structural_interaction_variant	HIGH	36	0	0.033	28	14	0.464	6.07661
Aplan-CEM-ATC25-C1_vs_Aplan-CEM-PreTreatment	chr2	39187665	39187665	A	C	CDKL4	c.697T>G	p.Phe233Val	missense_variant	MODERATE	16	0	0.07	27	17	0.609	4.68033
Aplan-CEM-ATC25-C1_vs_Aplan-CEM-PreTreatment	chr2	42055297	42055298	TG	T	PKDCC	c.1132delG	p.Val378fs	frameshift_variant	HIGH	32	0	0.034	48	14	0.281	3.30098
Aplan-CEM-ATC25-C1_vs_Aplan-CEM-PreTreatment	chr2	43225745	43225747	TTC	T	ZFP36L2	c.57_58delGA	p.Lys20fs	frameshift_variant	HIGH	54	0	0.019	80	31	0.386	6.36854
Aplan-CEM-ATC25-C1_vs_Aplan-CEM-PreTreatment	chr2	45008815	45008815	C	G	SIX2	c.296G>C	p.Arg99Pro	missense_variant	MODERATE	89	0	0.012	140	38	0.274	6.12763
Aplan-CEM-ATC25-C1_vs_Aplan-CEM-PreTreatment	chr2	47176471	47176471	G	C	RP11-761B3.1	c.39C>G	p.Arg13Arg	synonymous_variant	LOW	48	0	0.021	86	21	0.257	4.4146
Aplan-CEM-ATC25-C1_vs_Aplan-CEM-PreTreatment	chr2	47410170	47410170	T	C	MSH2	c.443T>C	p.V148A	structural_interaction_variant	HIGH	49	0	0.024	80	41	0.5	6.31914
Aplan-CEM-ATC25-C1_vs_Aplan-CEM-PreTreatment	chr2	53940002	53940003	TG	T	PSME4	c.501-3delC		splice_region_variant&intron_variant	LOW	19	0	0.052	36	17	0.481	3.82205
Aplan-CEM-ATC25-C1_vs_Aplan-CEM-PreTreatment	chr2	55026091	55026092	CT	C	RTN4	c.2007delA	p.Val670fs	frameshift_variant	HIGH	63	0	0.017	92	23	0.249	5.55401
Aplan-CEM-ATC25-C1_vs_Aplan-CEM-PreTreatment	chr2	68807325	68807325	C	G	ARHGAP25	c.519C>G	p.Gly173Gly	synonymous_variant	LOW	57	0	0.019	52	22	0.444	6.61752
Aplan-CEM-ATC25-C1_vs_Aplan-CEM-PreTreatment	chr2	69807951	69807951	C	G	ANXA4	c.352C>G	p.Arg118Gly	missense_variant	MODERATE	31	0	0.032	62	13	0.208	2.40757
Aplan-CEM-ATC25-C1_vs_Aplan-CEM-PreTreatment	chr2	70088537	70088537	C	A	PCBP1	c.794C>A	p.Pro265Gln	missense_variant	MODERATE	63	0	0.016	100	32	0.295	6.0144
Aplan-CEM-ATC25-C1_vs_Aplan-CEM-PreTreatment	chr2	70088582	70088582	C	G	PCBP1	c.839C>G	p.Thr280Ser	missense_variant	MODERATE	64	0	0.017	89	31	0.33	5.93076
Aplan-CEM-ATC25-C1_vs_Aplan-CEM-PreTreatment	chr2	70088789	70088789	C	G	PCBP1	c.1046C>G	p.Ser349Cys	missense_variant	MODERATE	39	0	0.027	59	17	0.285	4.15115
Aplan-CEM-ATC25-C1_vs_Aplan-CEM-PreTreatment	chr2	72825883	72825883	C	G	EXOC6B	c.28G>C	p.Glu10Gln	missense_variant	MODERATE	61	0	0.019	85	21	0.254	5.34973
Aplan-CEM-ATC25-C1_vs_Aplan-CEM-PreTreatment	chr2	79909685	79909685	C	T	CTNNA2	c.944C>T	p.Ala315Val	missense_variant	MODERATE	32	1	0.034	41	12	0.314	2.34952
Aplan-CEM-ATC25-C1_vs_Aplan-CEM-PreTreatment	chr2	80303038	80303039	AT	A	LRRTM1	c.781delA	p.Met261fs	frameshift_variant	HIGH	47	0	0.02	94	47	0.492	5.97686
Aplan-CEM-ATC25-C1_vs_Aplan-CEM-PreTreatment	chr2	84870369	84870369	C	G	TRABD2A	c.525G>C	p.Leu175Leu	synonymous_variant	LOW	45	0	0.024	70	14	0.224	3.12329
Aplan-CEM-ATC25-C1_vs_Aplan-CEM-PreTreatment	chr2	94871978	94871978	A	G	TEKT4	c.399A>G	p.Thr133Thr	synonymous_variant	LOW	50	0	0.022	99	36	0.359	5.92227
Aplan-CEM-ATC25-C1_vs_Aplan-CEM-PreTreatment	chr2	95285121	95285121	C	T	PROM2	c.1875+6C>T		splice_region_variant&intron_variant	LOW	36	0	0.029	59	20	0.327	4.74339
Aplan-CEM-ATC25-C1_vs_Aplan-CEM-PreTreatment	chr2	95948581	95948581	C	G	ANKRD36C	c.1311G>C	p.Leu437Leu	synonymous_variant	LOW	56	0	0.022	83	16	0.209	3.71549
Aplan-CEM-ATC25-C1_vs_Aplan-CEM-PreTreatment	chr2	96277208	96277208	C	G	SNRNP200	c.5965G>C	p.Glu1989Gln	missense_variant	MODERATE	46	0	0.025	47	15	0.341	4.79121
Aplan-CEM-ATC25-C1_vs_Aplan-CEM-PreTreatment	chr2	96291900	96291900	C	G	SNRNP200	c.2161G>C	p.Val721Leu	missense_variant&splice_region_variant	MODERATE	40	0	0.025	61	13	0.264	2.86448
Aplan-CEM-ATC25-C1_vs_Aplan-CEM-PreTreatment	chr2	96878031	96878031	C	G	FAM178B	c.1866G>C	p.Gln622His	missense_variant	MODERATE	35	0	0.029	66	14	0.217	2.71712
Aplan-CEM-ATC25-C1_vs_Aplan-CEM-PreTreatment	chr2	97658539	97658539	C	G	ACTR1B	c.545G>C	p.Arg182Pro	missense_variant	MODERATE	67	0	0.016	104	26	0.25	6.02564
Aplan-CEM-ATC25-C1_vs_Aplan-CEM-PreTreatment	chr2	97792792	97792792	C	G	TMEM131	c.3738G>C	p.Arg1246Ser	missense_variant	MODERATE	52	0	0.02	101	19	0.205	3.40826
Aplan-CEM-ATC25-C1_vs_Aplan-CEM-PreTreatment	chr2	97792892	97792892	T	C	TMEM131	c.3638A>G	p.Gln1213Arg	missense_variant	MODERATE	44	0	0.025	84	35	0.449	5.77807
Aplan-CEM-ATC25-C1_vs_Aplan-CEM-PreTreatment	chr2	98678375	98678375	G	A	MGAT4A	c.191C>T	p.Thr64Met	missense_variant	MODERATE	33	0	0.035	62	18	0.304	3.67526
Aplan-CEM-ATC25-C1_vs_Aplan-CEM-PreTreatment	chr2	98822113	98822113	G	C	KIAA1211L	c.2160C>G	p.Thr720Thr	synonymous_variant	LOW	45	0	0.022	61	24	0.364	6.28198
Aplan-CEM-ATC25-C1_vs_Aplan-CEM-PreTreatment	chr2	98822290	98822290	G	C	KIAA1211L	c.1983C>G	p.Pro661Pro	synonymous_variant	LOW	52	0	0.021	56	13	0.237	3.91147
Aplan-CEM-ATC25-C1_vs_Aplan-CEM-PreTreatment	chr2	98823284	98823285	TC	T	KIAA1211L	c.988delG	p.Glu330fs	frameshift_variant	HIGH	45	0	0.023	57	31	0.531	5.98755
Aplan-CEM-ATC25-C1_vs_Aplan-CEM-PreTreatment	chr2	98823520	98823520	G	T	KIAA1211L	c.753C>A	p.Ser251Ser	synonymous_variant	LOW	38	0	0.027	64	29	0.45	6.17012
Aplan-CEM-ATC25-C1_vs_Aplan-CEM-PreTreatment	chr2	98827004	98827004	G	C	KIAA1211L	c.706C>G	p.Arg236Gly	missense_variant	MODERATE	31	0	0.036	25	13	0.478	5.56041
Aplan-CEM-ATC25-C1_vs_Aplan-CEM-PreTreatment	chr2	98827082	98827082	T	C	KIAA1211L	c.628A>G	p.Ser210Gly	missense_variant	MODERATE	34	0	0.036	40	18	0.424	5.54134
Aplan-CEM-ATC25-C1_vs_Aplan-CEM-PreTreatment	chr2	101038571	101038571	A	G	TBC1D8	c.1165T>C	p.Phe389Leu	missense_variant	MODERATE	56	0	0.02	76	36	0.492	6.05209
Aplan-CEM-ATC25-C1_vs_Aplan-CEM-PreTreatment	chr2	101413064	101413064	C	T	RFX8	c.569G>A	p.Arg190Gln	missense_variant	MODERATE	26	0	0.044	32	10	0.31	2.8735
Aplan-CEM-ATC25-C1_vs_Aplan-CEM-PreTreatment	chr2	105399292	105399292	G	C	FHL2	c.254C>G	p.Ala85Gly	missense_variant	MODERATE	45	0	0.023	66	16	0.262	3.81923
Aplan-CEM-ATC25-C1_vs_Aplan-CEM-PreTreatment	chr2	106843446	106843446	G	C	ST6GAL2	c.532C>G	p.Arg178Gly	missense_variant	MODERATE	42	0	0.024	61	14	0.255	3.19068
Aplan-CEM-ATC25-C1_vs_Aplan-CEM-PreTreatment	chr2	109614946	109614946	C	T	SOWAHC	c.457C>T	p.Arg153Cys	missense_variant	MODERATE	85	0	0.013	128	36	0.27	5.96935
Aplan-CEM-ATC25-C1_vs_Aplan-CEM-PreTreatment	chr2	112559427	112559427	C	T	POLR1B	c.1579C>T	p.Leu527Leu	synonymous_variant	LOW	70	0	0.017	68	20	0.301	6.39579
Aplan-CEM-ATC25-C1_vs_Aplan-CEM-PreTreatment	chr2	113198888	113198888	C	G	PSD4	c.2769+4C>G		splice_region_variant&intron_variant	LOW	58	0	0.019	85	20	0.264	4.91871
Aplan-CEM-ATC25-C1_vs_Aplan-CEM-PreTreatment	chr2	113241676	113241676	C	G	PAX8	c.652G>C	p.Gly218Arg	missense_variant	MODERATE	41	0	0.025	60	15	0.245	3.53621
Aplan-CEM-ATC25-C1_vs_Aplan-CEM-PreTreatment	chr2	119604915	119604915	T	A	CFAP221	c.952T>A	p.Ser318Thr	missense_variant	MODERATE	38	0	0.029	73	17	0.224	3.27474
Aplan-CEM-ATC25-C1_vs_Aplan-CEM-PreTreatment	chr2	119680896	119680896	C	A	TMEM177	c.43C>A	p.His15Asn	missense_variant	MODERATE	50	0	0.022	52	23	0.437	6.34922
Aplan-CEM-ATC25-C1_vs_Aplan-CEM-PreTreatment	chr2	120988386	120988386	C	G	GLI2	c.2472C>G	p.Ser824Ser	synonymous_variant	LOW	28	0	0.036	71	21	0.286	3.20557
Aplan-CEM-ATC25-C1_vs_Aplan-CEM-PreTreatment	chr2	121249059	121249059	C	G	TFCP2L1	c.320G>C	p.Arg107Pro	missense_variant	MODERATE	24	0	0.04	38	11	0.305	2.36377
Aplan-CEM-ATC25-C1_vs_Aplan-CEM-PreTreatment	chr2	127630859	127630859	C	G	MYO7B	c.4810C>G	p.Pro1604Ala	missense_variant	MODERATE	61	0	0.02	70	20	0.288	5.7204
Aplan-CEM-ATC25-C1_vs_Aplan-CEM-PreTreatment	chr2	127633322	127633322	C	G	MYO7B	c.5392C>G	p.Arg1798Gly	missense_variant	MODERATE	34	0	0.036	40	13	0.317	3.90712
Aplan-CEM-ATC25-C1_vs_Aplan-CEM-PreTreatment	chr2	127654526	127654526	C	G	LIMS2	c.329G>C	p.Arg110Pro	missense_variant	MODERATE	50	1	0.042	73	19	0.267	3.54388
Aplan-CEM-ATC25-C1_vs_Aplan-CEM-PreTreatment	chr2	128318315	128318315	C	G	HS6ST1	c.249G>C	p.Met83Ile	missense_variant	MODERATE	27	0	0.041	59	17	0.28	3.02665
Aplan-CEM-ATC25-C1_vs_Aplan-CEM-PreTreatment	chr2	131480542	131480542	C	G	TUBA3D	c.849C>G	p.His283Gln	missense_variant	MODERATE	205	0	0.005531	317	68	0.21	6.02736
Aplan-CEM-ATC25-C1_vs_Aplan-CEM-PreTreatment	chr2	131482569	131482570	GC	G	TUBA3D	c.1080delC	p.Thr361fs	frameshift_variant	HIGH	195	0	0.005756	255	126	0.5	5.80842
Aplan-CEM-ATC25-C1_vs_Aplan-CEM-PreTreatment	chr2	134341614	134341614	A	G	MGAT5	c.832A>G	p.Thr278Ala	missense_variant	MODERATE	27	0	0.038	51	27	0.5	6.29756
Aplan-CEM-ATC25-C1_vs_Aplan-CEM-PreTreatment	chr2	134954489	134954489	C	G	CCNT2	c.2034C>G	p.Tyr678*	stop_gained	HIGH	34	0	0.029	68	18	0.25	3.28253
Aplan-CEM-ATC25-C1_vs_Aplan-CEM-PreTreatment	chr2	142130724	142130724	G	C	LRP1B	c.6C>G	p.Ser2Ser	synonymous_variant	LOW	11	0	0.1	17	8	0.374	2.01415
Aplan-CEM-ATC25-C1_vs_Aplan-CEM-PreTreatment	chr2	148875690	148875690	C	G	KIF5C	c.73C>G	p.Arg25Gly	missense_variant	MODERATE	28	0	0.04	36	18	0.457	5.56257
Aplan-CEM-ATC25-C1_vs_Aplan-CEM-PreTreatment	chr2	151464530	151464530	A	G	RIF1	c.5010A>G	p.Pro1670Pro	synonymous_variant	LOW	42	0	0.026	49	27	0.532	5.79081
Aplan-CEM-ATC25-C1_vs_Aplan-CEM-PreTreatment	chr2	151694324	151694324	T	C	NEB	c.1895A>G	p.Asp632Gly	missense_variant&splice_region_variant	MODERATE	46	0	0.026	68	24	0.328	6.16891
Aplan-CEM-ATC25-C1_vs_Aplan-CEM-PreTreatment	chr2	154709628	154709628	T	C	KCNJ3	c.728T>C	p.Phe243Ser	missense_variant	MODERATE	32	0	0.035	53	28	0.532	6.00851
Aplan-CEM-ATC25-C1_vs_Aplan-CEM-PreTreatment	chr2	160137559	160137559	C	T	ITGB6	c.1535G>A	p.Ser512Asn	missense_variant	MODERATE	64	0	0.016	71	31	0.451	6.031
Aplan-CEM-ATC25-C1_vs_Aplan-CEM-PreTreatment	chr2	161423747	161423747	G	C	TBR1	c.1569G>C	p.Ala523Ala	synonymous_variant	LOW	67	0	0.017	101	26	0.268	6.03516
Aplan-CEM-ATC25-C1_vs_Aplan-CEM-PreTreatment	chr2	165883927	165883927	G	C	TTC21B	c.3551C>G	p.Ala1184Gly	missense_variant	MODERATE	51	0	0.024	78	19	0.222	4.30911
Aplan-CEM-ATC25-C1_vs_Aplan-CEM-PreTreatment	chr2	167242971	167242971	A	G	XIRP2	c.1579A>G	p.Ser527Gly	missense_variant	MODERATE	52	0	0.022	85	46	0.54	6.13216
Aplan-CEM-ATC25-C1_vs_Aplan-CEM-PreTreatment	chr2	168765604	168765604	C	T	CERS6	c.858C>T	p.Thr286Thr	synonymous_variant	LOW	25	0	0.045	48	20	0.428	4.2763
Aplan-CEM-ATC25-C1_vs_Aplan-CEM-PreTreatment	chr2	170822103	170822103	C	G	GAD1	c.99C>G	p.Cys33Trp	missense_variant	MODERATE	23	0	0.043	45	15	0.298	2.8937
Aplan-CEM-ATC25-C1_vs_Aplan-CEM-PreTreatment	chr2	172427871	172427871	C	G	ITGA6	c.83C>G	p.Thr28Ser	missense_variant	MODERATE	60	0	0.018	71	13	0.209	3.66181
Aplan-CEM-ATC25-C1_vs_Aplan-CEM-PreTreatment	chr2	172465659	172465659	C	T	ITGA6	c.303C>T	p.Asn101Asn	synonymous_variant	LOW	49	0	0.024	62	21	0.328	5.61891
Aplan-CEM-ATC25-C1_vs_Aplan-CEM-PreTreatment	chr2	178382444	178382444	A	G	OSBPL6	c.1633A>G	p.Ser545Gly	missense_variant	MODERATE	40	0	0.029	69	43	0.589	5.81655
Aplan-CEM-ATC25-C1_vs_Aplan-CEM-PreTreatment	chr2	178477080	178477080	A	G	FKBP7	c.355T>C	p.Tyr119His	missense_variant	MODERATE	31	0	0.033	31	16	0.479	5.65777
Aplan-CEM-ATC25-C1_vs_Aplan-CEM-PreTreatment	chr2	178782875	178782875	C	G	TTN	c.3031G>C	p.Gly1011Arg	missense_variant	MODERATE	65	0	0.018	68	13	0.216	3.87338
Aplan-CEM-ATC25-C1_vs_Aplan-CEM-PreTreatment	chr2	178785989	178785989	G	C	TTN	c.2229C>G	p.Ala743Ala	synonymous_variant	LOW	63	0	0.017	67	21	0.3	5.91708
Aplan-CEM-ATC25-C1_vs_Aplan-CEM-PreTreatment	chr2	179115184	179115184	G	T	SESTD1	c.1720C>A	p.Arg574Arg	synonymous_variant	LOW	32	0	0.034	49	13	0.238	2.94533
Aplan-CEM-ATC25-C1_vs_Aplan-CEM-PreTreatment	chr2	184936062	184936062	G	A	ZNF804A	c.666G>A	p.Ala222Ala	synonymous_variant	LOW	42	0	0.025	92	49	0.506	6.19115
Aplan-CEM-ATC25-C1_vs_Aplan-CEM-PreTreatment	chr2	189755523	189755523	G	C	OSGEPL1	c.259C>G	p.His87Asp	missense_variant	MODERATE	34	0	0.03	62	13	0.245	2.46474
Aplan-CEM-ATC25-C1_vs_Aplan-CEM-PreTreatment	chr2	190437154	190437154	C	T	MFSD6	c.1125C>T	p.Phe375Phe	synonymous_variant	LOW	69	0	0.017	101	24	0.261	5.8142
Aplan-CEM-ATC25-C1_vs_Aplan-CEM-PreTreatment	chr2	191363855	191363855	G	C	MYO1B	c.893G>C	p.Ser298Thr	missense_variant	MODERATE	55	0	0.02	56	16	0.306	5.05783
Aplan-CEM-ATC25-C1_vs_Aplan-CEM-PreTreatment	chr2	199272515	199272515	A	T	SATB2	c.1898T>A	p.Ile633Asn	missense_variant	MODERATE	47	0	0.022	77	30	0.4	6.06438
Aplan-CEM-ATC25-C1_vs_Aplan-CEM-PreTreatment	chr2	200892204	200892204	C	G	NIF3L1	c.261C>G	p.Asp87Glu	missense_variant	MODERATE	47	0	0.022	81	19	0.222	3.87879
Aplan-CEM-ATC25-C1_vs_Aplan-CEM-PreTreatment	chr2	201619056	201619056	G	A	ALS2CR11	c.75C>T	p.Ser25Ser	synonymous_variant	LOW	74	0	0.017	72	30	0.411	6.08265
Aplan-CEM-ATC25-C1_vs_Aplan-CEM-PreTreatment	chr2	202035080	202035080	C	G	FZD7	c.433C>G	p.Arg145Gly	missense_variant	MODERATE	55	0	0.021	67	17	0.262	4.67446
Aplan-CEM-ATC25-C1_vs_Aplan-CEM-PreTreatment	chr2	202759397	202759398	CT	C	FAM117B	c.1451+45delT		sequence_feature	MODERATE	22	0	0.04	50	24	0.476	4.68459
Aplan-CEM-ATC25-C1_vs_Aplan-CEM-PreTreatment	chr2	203057334	203057335	CA	C	NBEAL1	c.405delA	p.Glu136fs	frameshift_variant	HIGH	30	0	0.038	45	25	0.575	6.09667
Aplan-CEM-ATC25-C1_vs_Aplan-CEM-PreTreatment	chr2	203380306	203380306	C	G	ABI2	c.384C>G	p.Ala128Ala	synonymous_variant	LOW	24	0	0.043	55	17	0.319	3.00747
Aplan-CEM-ATC25-C1_vs_Aplan-CEM-PreTreatment	chr2	203734839	203734839	G	A	CD28	c.632G>A	p.Arg211His	missense_variant	MODERATE	40	0	0.03	62	13	0.211	2.85573
Aplan-CEM-ATC25-C1_vs_Aplan-CEM-PreTreatment	chr2	208121703	208121703	G	C	CRYGD	c.495C>G	p.Gly165Gly	synonymous_variant	LOW	71	0	0.015	89	25	0.305	6.76862
Aplan-CEM-ATC25-C1_vs_Aplan-CEM-PreTreatment	chr2	211383870	211383870	G	T	ERBB4	c.3672C>A	p.Asn1224Lys	missense_variant	MODERATE	49	0	0.024	71	26	0.363	6.34194
Aplan-CEM-ATC25-C1_vs_Aplan-CEM-PreTreatment	chr2	214149220	214149220	C	G	SPAG16	c.1674C>G	p.Ile558Met	missense_variant	MODERATE	43	0	0.027	39	10	0.242	3.52698
Aplan-CEM-ATC25-C1_vs_Aplan-CEM-PreTreatment	chr2	215393163	215393163	G	C	FN1	c.3837C>G	p.T1279T	structural_interaction_variant	HIGH	29	0	0.04	47	13	0.285	2.92723
Aplan-CEM-ATC25-C1_vs_Aplan-CEM-PreTreatment	chr2	216435466	216435466	G	A	SMARCAL1	c.1614G>A	p.Gln538Gln	synonymous_variant	LOW	35	0	0.031	53	28	0.522	6.01035
Aplan-CEM-ATC25-C1_vs_Aplan-CEM-PreTreatment	chr2	217849060	217849060	A	C	TNS1	c.1082T>G	p.Leu361Arg	missense_variant	MODERATE	55	0	0.022	63	12	0.228	3.43867
Aplan-CEM-ATC25-C1_vs_Aplan-CEM-PreTreatment	chr2	218072804	218072804	G	C	RUFY4	c.305G>C	p.Arg102Pro	missense_variant	MODERATE	23	0	0.048	36	10	0.281	2.34369
Aplan-CEM-ATC25-C1_vs_Aplan-CEM-PreTreatment	chr2	218164497	218164497	G	C	CXCR1	c.715C>G	p.Arg239Gly	missense_variant	MODERATE	125	0	0.0083	183	45	0.242	6.08484
Aplan-CEM-ATC25-C1_vs_Aplan-CEM-PreTreatment	chr2	218356908	218356908	A	G	CATIP	c.24A>G	p.Thr8Thr	splice_region_variant&synonymous_variant	LOW	28	0	0.04	41	21	0.471	5.8132
Aplan-CEM-ATC25-C1_vs_Aplan-CEM-PreTreatment	chr2	218782203	218782203	G	C	CYP27A1	c.21G>C	p.Ala7Ala	synonymous_variant	LOW	48	0	0.023	53	17	0.285	5.33995
Aplan-CEM-ATC25-C1_vs_Aplan-CEM-PreTreatment	chr2	219060326	219060326	C	G	IHH	c.142G>C	p.A48P	structural_interaction_variant	HIGH	43	0	0.026	64	19	0.288	4.75261
Aplan-CEM-ATC25-C1_vs_Aplan-CEM-PreTreatment	chr2	219222311	219222311	G	T	ATG9A	c.1988C>A	p.Ala663Glu	missense_variant	MODERATE	59	0	0.018	93	24	0.263	5.44289
Aplan-CEM-ATC25-C1_vs_Aplan-CEM-PreTreatment	chr2	219514420	219514420	G	C	ASIC4	c.77G>C	p.Gly26Ala	missense_variant	MODERATE	38	0	0.028	65	13	0.233	2.74839
Aplan-CEM-ATC25-C1_vs_Aplan-CEM-PreTreatment	chr2	219539731	219539732	TG	T	CHPF	c.1979delC	p.Pro660fs	frameshift_variant	HIGH	61	0	0.019	81	15	0.208	3.83352
Aplan-CEM-ATC25-C1_vs_Aplan-CEM-PreTreatment	chr2	219570228	219570228	G	C	OBSL1	c.1005C>G	p.His335Gln	missense_variant	MODERATE	45	0	0.025	49	18	0.335	5.83173
Aplan-CEM-ATC25-C1_vs_Aplan-CEM-PreTreatment	chr2	219575266	219575266	G	C	INHA	c.841G>C	p.Val281Leu	missense_variant	MODERATE	54	0	0.019	93	24	0.292	5.0288
Aplan-CEM-ATC25-C1_vs_Aplan-CEM-PreTreatment	chr2	226795258	226795258	T	C	IRS1	c.3481A>G	p.Lys1161Glu	missense_variant	MODERATE	57	0	0.019	69	16	0.265	4.3104
Aplan-CEM-ATC25-C1_vs_Aplan-CEM-PreTreatment	chr2	227098750	227098750	T	C	COL4A4	c.1148A>G	p.Asp383Gly	missense_variant	MODERATE	26	0	0.045	43	12	0.324	2.63396
Aplan-CEM-ATC25-C1_vs_Aplan-CEM-PreTreatment	chr2	227688249	227688249	T	C	SLC19A3	c.1231A>G	p.Thr411Ala	missense_variant	MODERATE	25	0	0.04	43	11	0.289	2.29672
Aplan-CEM-ATC25-C1_vs_Aplan-CEM-PreTreatment	chr2	227885385	227885385	A	T	DAW1	c.75A>T	p.Leu25Phe	missense_variant	MODERATE	24	0	0.05	23	10	0.482	3.65572
Aplan-CEM-ATC25-C1_vs_Aplan-CEM-PreTreatment	chr2	229366949	229366949	C	T	DNER	c.2026G>A	p.Ala676Thr	missense_variant	MODERATE	70	0	0.015	122	44	0.387	5.7793
Aplan-CEM-ATC25-C1_vs_Aplan-CEM-PreTreatment	chr2	230910586	230910586	G	C	GPR55	c.377C>G	p.Pro126Arg	missense_variant	MODERATE	53	0	0.021	60	14	0.259	4.14256
Aplan-CEM-ATC25-C1_vs_Aplan-CEM-PreTreatment	chr2	231398588	231398588	G	C	B3GNT7	c.869G>C	p.Gly290Ala	missense_variant	MODERATE	72	0	0.014	118	26	0.227	5.47708
Aplan-CEM-ATC25-C1_vs_Aplan-CEM-PreTreatment	chr2	232263310	232263310	C	G	DIS3L2	c.1529C>G	p.Ala510Gly	missense_variant	MODERATE	43	0	0.025	90	25	0.293	4.63687
Aplan-CEM-ATC25-C1_vs_Aplan-CEM-PreTreatment	chr2	232876264	232876264	G	C	C2orf82	c.274G>C	p.Ala92Pro	missense_variant	MODERATE	42	0	0.024	56	10	0.211	2.35357
Aplan-CEM-ATC25-C1_vs_Aplan-CEM-PreTreatment	chr2	233796240	233796240	C	T	MROH2A	c.1188C>T	p.Ser396Ser	synonymous_variant	LOW	19	0	0.058	22	10	0.476	3.18099
Aplan-CEM-ATC25-C1_vs_Aplan-CEM-PreTreatment	chr2	233804180	233804180	C	G	MROH2A	c.1888C>G	p.Arg630Gly	missense_variant	MODERATE	56	0	0.019	75	29	0.38	5.99616
Aplan-CEM-ATC25-C1_vs_Aplan-CEM-PreTreatment	chr2	234496070	234496070	C	T	ARL4C	c.517G>A	p.Asp173Asn	missense_variant	MODERATE	83	0	0.014	119	33	0.287	6.48437
Aplan-CEM-ATC25-C1_vs_Aplan-CEM-PreTreatment	chr2	235042417	235042417	G	C	SH3BP4	c.1648G>C	p.Val550Leu	missense_variant	MODERATE	65	0	0.015	91	28	0.296	5.91492
Aplan-CEM-ATC25-C1_vs_Aplan-CEM-PreTreatment	chr2	235807288	235807288	G	C	AGAP1	c.1802G>C	p.Arg601Pro	missense_variant	MODERATE	42	0	0.028	73	21	0.322	4.57993
Aplan-CEM-ATC25-C1_vs_Aplan-CEM-PreTreatment	chr2	238107935	238107936	AC	A	ESPNL	c.823delC	p.Leu275fs	frameshift_variant	HIGH	61	0	0.019	50	15	0.312	5.78103
Aplan-CEM-ATC25-C1_vs_Aplan-CEM-PreTreatment	chr2	238163819	238163819	G	C	ERFE	c.507G>C	p.Pro169Pro	synonymous_variant	LOW	45	0	0.025	78	25	0.296	5.53309
Aplan-CEM-ATC25-C1_vs_Aplan-CEM-PreTreatment	chr2	238164100	238164100	G	C	ERFE	c.713G>C	p.Arg238Pro	missense_variant	MODERATE	61	0	0.019	84	22	0.291	5.70421
Aplan-CEM-ATC25-C1_vs_Aplan-CEM-PreTreatment	chr2	238251729	238251729	G	C	PER2	c.3144C>G	p.Asp1048Glu	missense_variant	MODERATE	35	0	0.03	28	8	0.296	3.09554
Aplan-CEM-ATC25-C1_vs_Aplan-CEM-PreTreatment	chr2	240462569	240462569	G	C	GPC1	c.704G>C	p.Arg235Pro	missense_variant	MODERATE	27	0	0.037	42	13	0.371	3.01319
Aplan-CEM-ATC25-C1_vs_Aplan-CEM-PreTreatment	chr2	240577668	240577668	G	C	RNPEPL1	c.1261G>C	p.Glu421Gln	missense_variant	MODERATE	59	0	0.019	90	25	0.282	5.79753
Aplan-CEM-ATC25-C1_vs_Aplan-CEM-PreTreatment	chr2	240692389	240692389	G	C	AQP12A	c.475G>C	p.Val159Leu	missense_variant	MODERATE	129	0	0.008276	181	32	0.212	6.31812
Aplan-CEM-ATC25-C1_vs_Aplan-CEM-PreTreatment	chr2	240868890	240868891	AC	A	AGXT	c.33delC	p.Lys12fs	frameshift_variant	HIGH	52	0	0.02	91	41	0.454	6.05427
Aplan-CEM-ATC25-C1_vs_Aplan-CEM-PreTreatment	chr2	241230215	241230215	T	C	HDLBP	c.3529A>G	p.Thr1177Ala	missense_variant	MODERATE	19	0	0.051	36	20	0.531	4.75749
Aplan-CEM-ATC25-C1_vs_Aplan-CEM-PreTreatment	chr2	241634057	241634057	G	A	THAP4	c.100C>T	p.Arg34Cys	missense_variant	MODERATE	39	0	0.029	46	10	0.221	2.82221
Aplan-CEM-ATC25-C1_vs_Aplan-CEM-PreTreatment	chr3	3026121	3026122	AC	A	CNTN4	c.1511delC	p.Pro504fs	frameshift_variant	HIGH	24	0	0.048	44	13	0.332	2.59139
Aplan-CEM-ATC25-C1_vs_Aplan-CEM-PreTreatment	chr3	4453044	4453044	G	A	SUMF1	c.276C>T	p.Val92Val	synonymous_variant	LOW	26	0	0.042	39	17	0.457	4.51581
Aplan-CEM-ATC25-C1_vs_Aplan-CEM-PreTreatment	chr3	9741416	9741416	C	G	BRPF1	c.1831C>G	p.Arg611Gly	missense_variant	MODERATE	43	0	0.026	70	22	0.327	5.0017
Aplan-CEM-ATC25-C1_vs_Aplan-CEM-PreTreatment	chr3	9793140	9793140	C	G	ARPC4	c.19C>G	p.Pro7Ala	missense_variant	MODERATE	84	0	0.013	105	21	0.209	5.71861
Aplan-CEM-ATC25-C1_vs_Aplan-CEM-PreTreatment	chr3	9928197	9928197	C	G	IL17RC	c.1067C>G	p.Thr356Arg	missense_variant	MODERATE	42	0	0.029	74	21	0.301	4.54529
Aplan-CEM-ATC25-C1_vs_Aplan-CEM-PreTreatment	chr3	9933157	9933157	T	C	IL17RC	c.1940T>C	p.Val647Ala	missense_variant	MODERATE	48	0	0.02	69	17	0.258	4.13872
Aplan-CEM-ATC25-C1_vs_Aplan-CEM-PreTreatment	chr3	10360106	10360106	G	A	ATP2B2	c.1677C>T	p.Gly559Gly	synonymous_variant	LOW	64	0	0.018	86	26	0.286	6.60818
Aplan-CEM-ATC25-C1_vs_Aplan-CEM-PreTreatment	chr3	10816367	10816367	G	A	SLC6A11	c.102G>A	p.Ala34Ala	synonymous_variant	LOW	39	0	0.029	53	22	0.449	6.21674
Aplan-CEM-ATC25-C1_vs_Aplan-CEM-PreTreatment	chr3	12803558	12803558	C	G	CAND2	c.139C>G	p.Arg47Gly	missense_variant	MODERATE	40	0	0.026	39	15	0.394	5.33134
Aplan-CEM-ATC25-C1_vs_Aplan-CEM-PreTreatment	chr3	13629153	13629154	AC	A	FBLN2	c.2714-5delC		splice_region_variant&intron_variant	LOW	76	0	0.015	102	43	0.437	5.99365
Aplan-CEM-ATC25-C1_vs_Aplan-CEM-PreTreatment	chr3	14683195	14683195	C	G	C3orf20	c.482C>G	p.Ser161Trp	missense_variant&splice_region_variant	MODERATE	48	0	0.024	72	18	0.254	4.35936
Aplan-CEM-ATC25-C1_vs_Aplan-CEM-PreTreatment	chr3	15262202	15262202	G	A	SH3BP5	c.583C>T	p.Arg195*	stop_gained	HIGH	54	0	0.022	69	17	0.228	4.60091
Aplan-CEM-ATC25-C1_vs_Aplan-CEM-PreTreatment	chr3	30671943	30671943	C	T	TGFBR2	c.835C>T	p.Arg279Cys	missense_variant	MODERATE	75	0	0.015	104	24	0.222	5.76591
Aplan-CEM-ATC25-C1_vs_Aplan-CEM-PreTreatment	chr3	31580101	31580101	G	A	STT3B	c.711+5G>A		splice_region_variant&intron_variant	LOW	43	0	0.025	55	31	0.544	6.14432
Aplan-CEM-ATC25-C1_vs_Aplan-CEM-PreTreatment	chr3	32997072	32997072	G	GT	GLB1	c.2006dupA	p.Asn669fs	frameshift_variant	HIGH	97	0	0.011	164	35	0.217	6.10761
Aplan-CEM-ATC25-C1_vs_Aplan-CEM-PreTreatment	chr3	33014144	33014144	G	C	GLB1	c.1646C>G	p.Pro549Arg	missense_variant	MODERATE	83	0	0.014	147	36	0.231	6.14241
Aplan-CEM-ATC25-C1_vs_Aplan-CEM-PreTreatment	chr3	33068962	33068962	G	A	GLB1	c.254C>T	p.Pro85Leu	missense_variant	MODERATE	101	0	0.012	115	30	0.265	6.19646
Aplan-CEM-ATC25-C1_vs_Aplan-CEM-PreTreatment	chr3	37327010	37327011	AC	A	GOLGA4	c.5193delC	p.Arg1732fs	frameshift_variant	HIGH	53	0	0.022	70	31	0.433	5.79577
Aplan-CEM-ATC25-C1_vs_Aplan-CEM-PreTreatment	chr3	37481504	37481505	GA	G	ITGA9	c.443delA	p.Asn148fs	frameshift_variant	HIGH	41	0	0.026	52	25	0.5	6.10445
Aplan-CEM-ATC25-C1_vs_Aplan-CEM-PreTreatment	chr3	37542515	37542515	G	C	ITGA9	c.1619G>C	p.Gly540Ala	missense_variant	MODERATE	48	0	0.023	63	18	0.296	4.91977
Aplan-CEM-ATC25-C1_vs_Aplan-CEM-PreTreatment	chr3	37803868	37803868	G	C	ITGA9	c.2935G>C	p.Val979Leu	missense_variant	MODERATE	45	0	0.024	68	20	0.296	4.74849
Aplan-CEM-ATC25-C1_vs_Aplan-CEM-PreTreatment	chr3	38007776	38007776	G	C	PLCD1	c.2331C>G	p.Asp777Glu	missense_variant	MODERATE	29	0	0.038	42	11	0.216	2.69598
Aplan-CEM-ATC25-C1_vs_Aplan-CEM-PreTreatment	chr3	38008506	38008506	G	T	PLCD1	c.1917C>A	p.Arg639Arg	synonymous_variant	LOW	52	0	0.025	36	7	0.212	2.88109
Aplan-CEM-ATC25-C1_vs_Aplan-CEM-PreTreatment	chr3	38479805	38479805	A	G	ACVR2B	c.938A>G	p.His313Arg	missense_variant	MODERATE	62	0	0.018	75	43	0.557	6.08672
Aplan-CEM-ATC25-C1_vs_Aplan-CEM-PreTreatment	chr3	39410957	39410957	T	C	RPSA	c.471T>C	p.Ser157Ser	synonymous_variant	LOW	51	0	0.022	63	13	0.207	3.31573
Aplan-CEM-ATC25-C1_vs_Aplan-CEM-PreTreatment	chr3	42636920	42636920	T	C	NKTR	c.1216T>C	p.Ser406Pro	missense_variant	MODERATE	58	0	0.02	57	17	0.302	5.41282
Aplan-CEM-ATC25-C1_vs_Aplan-CEM-PreTreatment	chr3	43033532	43033532	G	A	FAM198A	c.1269G>A	p.Ala423Ala	synonymous_variant	LOW	53	0	0.022	86	28	0.342	6.49469
Aplan-CEM-ATC25-C1_vs_Aplan-CEM-PreTreatment	chr3	44304020	44304020	A	G	TOPAZ1	c.3803A>G	p.Gln1268Arg	missense_variant	MODERATE	18	0	0.059	23	9	0.428	2.60707
Aplan-CEM-ATC25-C1_vs_Aplan-CEM-PreTreatment	chr3	44594877	44594877	C	G	ZNF660	c.684C>G	p.Ile228Met	missense_variant	MODERATE	66	0	0.019	115	34	0.301	6.07904
Aplan-CEM-ATC25-C1_vs_Aplan-CEM-PreTreatment	chr3	44828256	44828257	GA	G	KIF15	c.2904delA	p.Val969fs	frameshift_variant	HIGH	27	0	0.04	44	19	0.388	4.73661
Aplan-CEM-ATC25-C1_vs_Aplan-CEM-PreTreatment	chr3	44838420	44838420	A	G	KIF15	c.3317A>G	p.Lys1106Arg	missense_variant&splice_region_variant	MODERATE	48	0	0.023	45	18	0.414	5.90681
Aplan-CEM-ATC25-C1_vs_Aplan-CEM-PreTreatment	chr3	44989575	44989575	T	A	EXOSC7	c.185T>A	p.Val62Glu	missense_variant	MODERATE	28	0	0.039	31	10	0.335	3.03867
Aplan-CEM-ATC25-C1_vs_Aplan-CEM-PreTreatment	chr3	47420959	47420959	A	G	SCAP	c.1316T>C	p.Val439Ala	missense_variant	MODERATE	23	0	0.045	38	10	0.297	2.02587
Aplan-CEM-ATC25-C1_vs_Aplan-CEM-PreTreatment	chr3	47846610	47846610	G	C	DHX30	c.1622G>C	p.Arg541Pro	missense_variant	MODERATE	86	0	0.013	155	41	0.255	5.89048
Aplan-CEM-ATC25-C1_vs_Aplan-CEM-PreTreatment	chr3	48579652	48579652	C	T	COL7A1	c.5171G>A	p.Arg1724His	missense_variant	MODERATE	59	0	0.018	83	18	0.222	4.3879
Aplan-CEM-ATC25-C1_vs_Aplan-CEM-PreTreatment	chr3	48588863	48588863	G	T	COL7A1	c.2440+7C>A		splice_region_variant&intron_variant	LOW	72	0	0.016	97	22	0.221	5.64505
Aplan-CEM-ATC25-C1_vs_Aplan-CEM-PreTreatment	chr3	48645080	48645080	G	C	CELSR3	c.7927C>G	p.Arg2643Gly	missense_variant	MODERATE	54	0	0.019	65	14	0.236	3.96403
Aplan-CEM-ATC25-C1_vs_Aplan-CEM-PreTreatment	chr3	48661269	48661269	G	C	CELSR3	c.1366C>G	p.Arg456Gly	missense_variant	MODERATE	63	0	0.017	63	19	0.298	6.1128
Aplan-CEM-ATC25-C1_vs_Aplan-CEM-PreTreatment	chr3	49132335	49132335	C	T	LAMB2	c.320G>A	p.Arg107His	missense_variant	MODERATE	67	0	0.017	97	46	0.482	6.02104
Aplan-CEM-ATC25-C1_vs_Aplan-CEM-PreTreatment	chr3	49417596	49417596	T	C	AMT	c.1156A>G	p.Met386Val	missense_variant	MODERATE	95	0	0.011	151	38	0.25	6.05154
Aplan-CEM-ATC25-C1_vs_Aplan-CEM-PreTreatment	chr3	49654684	49654684	G	C	BSN	c.5128G>C	p.Ala1710Pro	missense_variant	MODERATE	81	1	0.026	112	25	0.247	5.17015
Aplan-CEM-ATC25-C1_vs_Aplan-CEM-PreTreatment	chr3	49663101	49663101	G	C	BSN	c.10943G>C	p.Gly3648Ala	missense_variant	MODERATE	70	0	0.016	94	26	0.268	6.50916
Aplan-CEM-ATC25-C1_vs_Aplan-CEM-PreTreatment	chr3	49681178	49681178	C	T	APEH	c.1377C>T	p.Pro459Pro	synonymous_variant	LOW	61	0	0.019	83	22	0.29	5.738
Aplan-CEM-ATC25-C1_vs_Aplan-CEM-PreTreatment	chr3	49718726	49718726	C	T	AMIGO3	c.740G>A	p.Arg247His	missense_variant	MODERATE	66	0	0.017	106	28	0.251	6.24452
Aplan-CEM-ATC25-C1_vs_Aplan-CEM-PreTreatment	chr3	49808076	49808076	C	G	UBA7	c.2467G>C	p.Ala823Pro	missense_variant	MODERATE	54	0	0.019	90	17	0.208	3.58322
Aplan-CEM-ATC25-C1_vs_Aplan-CEM-PreTreatment	chr3	49859779	49859780	CG	C	CAMKV	c.1044delC	p.Ala350fs	frameshift_variant	HIGH	65	0	0.017	111	60	0.531	6.36229
Aplan-CEM-ATC25-C1_vs_Aplan-CEM-PreTreatment	chr3	49903545	49903545	G	C	MST1R	c.65C>G	p.Ala22Gly	missense_variant	MODERATE	56	0	0.019	96	21	0.214	4.4244
Aplan-CEM-ATC25-C1_vs_Aplan-CEM-PreTreatment	chr3	49968547	49968547	A	G	RBM6	c.1122A>G	p.Gly374Gly	synonymous_variant	LOW	78	0	0.014	113	55	0.49	5.79298
Aplan-CEM-ATC25-C1_vs_Aplan-CEM-PreTreatment	chr3	50271420	50271420	C	T	SEMA3B	c.604C>T	p.Arg202Cys	missense_variant	MODERATE	58	0	0.019	64	21	0.322	6.10055
Aplan-CEM-ATC25-C1_vs_Aplan-CEM-PreTreatment	chr3	50342927	50342927	G	A	ZMYND10	c.691C>T	p.Arg231Trp	missense_variant	MODERATE	45	0	0.024	63	33	0.554	6.40444
Aplan-CEM-ATC25-C1_vs_Aplan-CEM-PreTreatment	chr3	50345180	50345180	C	T	ZMYND10	c.145G>A	p.Asp49Asn	missense_variant	MODERATE	34	0	0.028	48	24	0.467	6.0083
Aplan-CEM-ATC25-C1_vs_Aplan-CEM-PreTreatment	chr3	50380761	50380761	G	C	CACNA2D2	c.829C>G	p.Arg277Gly	missense_variant	MODERATE	31	0	0.034	54	18	0.347	3.80576
Aplan-CEM-ATC25-C1_vs_Aplan-CEM-PreTreatment	chr3	51237572	51237572	C	G	DOCK3	c.2084C>G	p.Ala695Gly	missense_variant	MODERATE	43	0	0.031	59	12	0.217	2.9621
Aplan-CEM-ATC25-C1_vs_Aplan-CEM-PreTreatment	chr3	51338411	51338411	A	G	DOCK3	c.3664A>G	p.Asn1222Asp	missense_variant	MODERATE	41	0	0.028	59	31	0.521	5.78962
Aplan-CEM-ATC25-C1_vs_Aplan-CEM-PreTreatment	chr3	51360639	51360639	C	G	DOCK3	c.5006+7C>G		splice_region_variant&intron_variant	LOW	62	0	0.018	82	21	0.253	5.42876
Aplan-CEM-ATC25-C1_vs_Aplan-CEM-PreTreatment	chr3	51385362	51385362	C	G	MANF	c.29C>G	p.Thr10Arg	missense_variant	MODERATE	32	0	0.039	40	12	0.308	3.14613
Aplan-CEM-ATC25-C1_vs_Aplan-CEM-PreTreatment	chr3	51637434	51637434	C	G	RAD54L2	c.1613C>G	p.Pro538Arg	missense_variant	MODERATE	53	0	0.021	104	22	0.236	4.23522
Aplan-CEM-ATC25-C1_vs_Aplan-CEM-PreTreatment	chr3	51863204	51863204	T	C	IQCF2	c.329T>C	p.Val110Ala	missense_variant	MODERATE	60	0	0.019	92	21	0.244	4.86717
Aplan-CEM-ATC25-C1_vs_Aplan-CEM-PreTreatment	chr3	51987412	51987412	G	C	ACY1	c.811G>C	p.Ala271Pro	missense_variant	MODERATE	80	0	0.014	130	25	0.221	5.51073
Aplan-CEM-ATC25-C1_vs_Aplan-CEM-PreTreatment	chr3	52231138	52231138	G	C	TWF2	c.472C>G	p.Arg158Gly	missense_variant	MODERATE	62	0	0.017	80	21	0.257	5.42693
Aplan-CEM-ATC25-C1_vs_Aplan-CEM-PreTreatment	chr3	52231517	52231517	G	C	TWF2	c.305C>G	p.Ala102Gly	missense_variant	MODERATE	40	0	0.027	59	14	0.264	3.20705
Aplan-CEM-ATC25-C1_vs_Aplan-CEM-PreTreatment	chr3	52231976	52231976	G	C	TWF2	c.250C>G	p.Leu84Val	missense_variant	MODERATE	59	0	0.019	83	18	0.25	4.3879
Aplan-CEM-ATC25-C1_vs_Aplan-CEM-PreTreatment	chr3	52245887	52245887	G	C	PPM1M	c.63G>C	p.Pro21Pro	synonymous_variant	LOW	35	0	0.032	43	9	0.243	2.45849
Aplan-CEM-ATC25-C1_vs_Aplan-CEM-PreTreatment	chr3	52247013	52247013	G	C	PPM1M	c.382G>C	p.Gly128Arg	missense_variant	MODERATE	54	1	0.022	86	20	0.24	3.39792
Aplan-CEM-ATC25-C1_vs_Aplan-CEM-PreTreatment	chr3	52247192	52247192	G	C	PPM1M	c.561G>C	p.Leu187Phe	missense_variant	MODERATE	57	0	0.019	104	30	0.297	6.14383
Aplan-CEM-ATC25-C1_vs_Aplan-CEM-PreTreatment	chr3	52248196	52248196	G	C	PPM1M	c.754G>C	p.Glu252Gln	missense_variant	MODERATE	58	0	0.02	42	15	0.378	6.40951
Aplan-CEM-ATC25-C1_vs_Aplan-CEM-PreTreatment	chr3	52248661	52248661	G	A	PPM1M	c.939G>A	p.Ser313Ser	synonymous_variant	LOW	36	0	0.03	51	14	0.265	3.58254
Aplan-CEM-ATC25-C1_vs_Aplan-CEM-PreTreatment	chr3	52353622	52353622	G	A	DNAH1	c.3469G>A	p.Ala1157Thr	missense_variant	MODERATE	76	0	0.014	90	21	0.234	5.90751
Aplan-CEM-ATC25-C1_vs_Aplan-CEM-PreTreatment	chr3	52441328	52441328	G	C	SEMA3G	c.749C>G	p.Thr250Arg	missense_variant	MODERATE	37	0	0.028	44	15	0.325	4.53194
Aplan-CEM-ATC25-C1_vs_Aplan-CEM-PreTreatment	chr3	52458700	52458700	G	A	NISCH	c.216G>A	p.Pro72Pro	synonymous_variant	LOW	38	0	0.031	52	14	0.261	3.64219
Aplan-CEM-ATC25-C1_vs_Aplan-CEM-PreTreatment	chr3	52487798	52487798	C	A	NISCH	c.2306C>A	p.Thr769Asn	missense_variant	MODERATE	101	0	0.011	120	59	0.509	5.84249
Aplan-CEM-ATC25-C1_vs_Aplan-CEM-PreTreatment	chr3	52502098	52502098	G	A	STAB1	c.417+7G>A		splice_region_variant&intron_variant	LOW	50	0	0.023	54	25	0.455	6.50294
Aplan-CEM-ATC25-C1_vs_Aplan-CEM-PreTreatment	chr3	52516695	52516695	C	G	STAB1	c.4290C>G	p.Cys1430Trp	missense_variant	MODERATE	63	0	0.017	85	17	0.219	4.38264
Aplan-CEM-ATC25-C1_vs_Aplan-CEM-PreTreatment	chr3	52516736	52516736	C	G	STAB1	c.4331C>G	p.Ala1444Gly	missense_variant	MODERATE	60	0	0.017	89	19	0.217	4.57342
Aplan-CEM-ATC25-C1_vs_Aplan-CEM-PreTreatment	chr3	52518745	52518745	C	A	STAB1	c.4910C>A	p.Ala1637Glu	missense_variant	MODERATE	69	0	0.015	101	22	0.217	5.15458
Aplan-CEM-ATC25-C1_vs_Aplan-CEM-PreTreatment	chr3	52518750	52518750	C	G	STAB1	c.4915C>G	p.Arg1639Gly	missense_variant	MODERATE	72	0	0.014	102	25	0.258	6.15829
Aplan-CEM-ATC25-C1_vs_Aplan-CEM-PreTreatment	chr3	53189222	53189222	G	A	PRKCD	c.1719G>A	p.Lys573Lys	synonymous_variant	LOW	65	0	0.017	97	49	0.536	5.85334
Aplan-CEM-ATC25-C1_vs_Aplan-CEM-PreTreatment	chr3	53823927	53823927	G	C	CHDH	c.82C>G	p.Arg28Gly	missense_variant	MODERATE	63	0	0.018	77	24	0.283	6.47052
Aplan-CEM-ATC25-C1_vs_Aplan-CEM-PreTreatment	chr3	57757764	57757764	G	C	SLMAP	c.113G>C	p.Arg38Pro	missense_variant	MODERATE	38	0	0.027	44	11	0.205	3.19815
Aplan-CEM-ATC25-C1_vs_Aplan-CEM-PreTreatment	chr3	57757817	57757817	G	A	SLMAP	c.166G>A	p.Ala56Thr	missense_variant	MODERATE	42	0	0.024	43	19	0.421	6.53288
Aplan-CEM-ATC25-C1_vs_Aplan-CEM-PreTreatment	chr3	58136095	58136095	T	C	FLNB	c.4881T>C	p.Gly1627Gly	synonymous_variant	LOW	54	0	0.022	67	15	0.236	3.97509
Aplan-CEM-ATC25-C1_vs_Aplan-CEM-PreTreatment	chr3	62203630	62203630	C	G	PTPRG	c.1835C>G	p.Thr612Ser	missense_variant	MODERATE	53	0	0.019	93	19	0.213	3.8152
Aplan-CEM-ATC25-C1_vs_Aplan-CEM-PreTreatment	chr3	67004243	67004243	G	A	KBTBD8	c.1276G>A	p.Ala426Thr	missense_variant	MODERATE	43	0	0.025	45	22	0.475	6.14967
Aplan-CEM-ATC25-C1_vs_Aplan-CEM-PreTreatment	chr3	69965011	69965011	C	T	MITF	c.1344C>T	p.Leu448Leu	synonymous_variant	LOW	48	1	0.042	80	39	0.464	5.96752
Aplan-CEM-ATC25-C1_vs_Aplan-CEM-PreTreatment	chr3	71754084	71754084	G	A	GPR27	c.35G>A	p.Gly12Asp	missense_variant	MODERATE	28	0	0.036	44	12	0.285	2.64891
Aplan-CEM-ATC25-C1_vs_Aplan-CEM-PreTreatment	chr3	73384394	73384394	G	C	PDZRN3	c.2172C>G	p.Ser724Arg	missense_variant	MODERATE	41	0	0.03	41	14	0.342	4.49409
Aplan-CEM-ATC25-C1_vs_Aplan-CEM-PreTreatment	chr3	98001644	98001644	C	G	GABRR3	c.878G>C	p.Arg293Pro	missense_variant	MODERATE	24	0	0.043	43	12	0.317	2.5419
Aplan-CEM-ATC25-C1_vs_Aplan-CEM-PreTreatment	chr3	98593281	98593281	C	G	CPOX	c.224G>C	p.Gly75Ala	missense_variant	MODERATE	69	0	0.016	72	20	0.285	6.35291
Aplan-CEM-ATC25-C1_vs_Aplan-CEM-PreTreatment	chr3	99795953	99795953	C	A	COL8A1	c.2052C>A	p.Pro684Pro	synonymous_variant	LOW	40	0	0.026	76	17	0.247	3.26591
Aplan-CEM-ATC25-C1_vs_Aplan-CEM-PreTreatment	chr3	100834709	100834709	G	C	ABI3BP	c.2277C>G	p.Arg759Arg	synonymous_variant	LOW	40	0	0.029	36	10	0.242	3.57464
Aplan-CEM-ATC25-C1_vs_Aplan-CEM-PreTreatment	chr3	111885287	111885288	AC	A	PHLDB2	c.1216delC	p.Gln406fs	frameshift_variant	HIGH	59	0	0.019	90	23	0.262	5.50858
Aplan-CEM-ATC25-C1_vs_Aplan-CEM-PreTreatment	chr3	112639170	112639170	C	G	CCDC80	c.736G>C	p.Glu246Gln	missense_variant	MODERATE	62	0	0.017	96	21	0.231	4.83134
Aplan-CEM-ATC25-C1_vs_Aplan-CEM-PreTreatment	chr3	113657037	113657037	G	C	USF3	c.4645C>G	p.Arg1549Gly	missense_variant	MODERATE	73	0	0.015	80	37	0.439	5.93739
Aplan-CEM-ATC25-C1_vs_Aplan-CEM-PreTreatment	chr3	114128731	114128731	C	G	DRD3	c.1188G>C	p.Lys396Asn	missense_variant	MODERATE	49	0	0.02	84	19	0.237	3.85668
Aplan-CEM-ATC25-C1_vs_Aplan-CEM-PreTreatment	chr3	114131366	114131366	T	C	DRD3	c.758A>G	p.Lys253Arg	missense_variant	MODERATE	53	0	0.021	81	19	0.236	4.28723
Aplan-CEM-ATC25-C1_vs_Aplan-CEM-PreTreatment	chr3	114351753	114351753	G	C	ZBTB20	c.325C>G	p.Arg109Gly	missense_variant	MODERATE	75	0	0.014	93	18	0.212	4.83326
Aplan-CEM-ATC25-C1_vs_Aplan-CEM-PreTreatment	chr3	119529834	119529834	G	C	CD80	c.796+8C>G		splice_region_variant&intron_variant	LOW	31	0	0.038	23	7	0.333	2.85878
Aplan-CEM-ATC25-C1_vs_Aplan-CEM-PreTreatment	chr3	121623092	121623092	G	C	FBXO40	c.1663G>C	p.Glu555Gln	missense_variant	MODERATE	52	0	0.019	83	20	0.239	4.56271
Aplan-CEM-ATC25-C1_vs_Aplan-CEM-PreTreatment	chr3	121694138	121694138	C	G	GOLGB1	c.6385G>C	p.Glu2129Gln	missense_variant	MODERATE	54	0	0.02	70	19	0.295	5.21089
Aplan-CEM-ATC25-C1_vs_Aplan-CEM-PreTreatment	chr3	122626975	122626975	G	GA	PARP15	c.1387dupA	p.Arg463fs	frameshift_variant	HIGH	37	0	0.027	47	23	0.466	5.9424
Aplan-CEM-ATC25-C1_vs_Aplan-CEM-PreTreatment	chr3	123319801	123319801	G	A	ADCY5	c.2129C>T	p.Ala710Val	missense_variant	MODERATE	57	0	0.02	80	18	0.214	4.40743
Aplan-CEM-ATC25-C1_vs_Aplan-CEM-PreTreatment	chr3	123447714	123447714	C	G	ADCY5	c.832G>C	p.Val278Leu	missense_variant	MODERATE	56	0	0.021	99	31	0.314	6.51789
Aplan-CEM-ATC25-C1_vs_Aplan-CEM-PreTreatment	chr3	123915108	123915109	GT	G	CCDC14	c.2409delA	p.Lys803fs	frameshift_variant	HIGH	52	0	0.02	74	39	0.536	5.86587
Aplan-CEM-ATC25-C1_vs_Aplan-CEM-PreTreatment	chr3	124973781	124973781	C	G	HEG1	c.3946G>C	p.Glu1316Gln	missense_variant	MODERATE	30	0	0.032	42	10	0.244	2.40662
Aplan-CEM-ATC25-C1_vs_Aplan-CEM-PreTreatment	chr3	125013878	125013878	C	G	HEG1	c.1701G>C	p.Ala567Ala	synonymous_variant	LOW	46	0	0.023	79	24	0.324	5.1729
Aplan-CEM-ATC25-C1_vs_Aplan-CEM-PreTreatment	chr3	125232423	125232423	T	C	ZNF148	c.2303A>G	p.Glu768Gly	missense_variant	MODERATE	69	0	0.017	80	16	0.231	4.62732
Aplan-CEM-ATC25-C1_vs_Aplan-CEM-PreTreatment	chr3	125538583	125538583	A	G	OSBPL11	c.1892T>C	p.Val631Ala	missense_variant	MODERATE	36	0	0.028	43	22	0.515	6.39582
Aplan-CEM-ATC25-C1_vs_Aplan-CEM-PreTreatment	chr3	125975611	125975611	G	C	ROPN1B	c.165G>C	p.Arg55Arg	synonymous_variant	LOW	48	0	0.022	78	18	0.23	3.96548
Aplan-CEM-ATC25-C1_vs_Aplan-CEM-PreTreatment	chr3	126419685	126419685	G	A	CFAP100	c.783G>A	p.Lys261Lys	synonymous_variant	LOW	37	0	0.031	58	13	0.255	2.87256
Aplan-CEM-ATC25-C1_vs_Aplan-CEM-PreTreatment	chr3	127014829	127014829	G	C	PLXNA1	c.2875G>C	p.Val959Leu	missense_variant&splice_region_variant	MODERATE	61	0	0.017	94	27	0.304	5.84979
Aplan-CEM-ATC25-C1_vs_Aplan-CEM-PreTreatment	chr3	128906166	128906166	C	T	ACAD9	c.1195C>T	p.Gln399*	stop_gained	HIGH	53	0	0.022	66	40	0.586	6.28937
Aplan-CEM-ATC25-C1_vs_Aplan-CEM-PreTreatment	chr3	128945413	128945413	G	C	RP11-723O4.6	c.554C>G	p.Ala185Gly	missense_variant	MODERATE	60	0	0.018	81	23	0.297	6.10725
Aplan-CEM-ATC25-C1_vs_Aplan-CEM-PreTreatment	chr3	128976985	128976985	G	C	KIAA1257	c.890C>G	p.Thr297Arg	missense_variant	MODERATE	27	0	0.043	44	15	0.297	3.28004
Aplan-CEM-ATC25-C1_vs_Aplan-CEM-PreTreatment	chr3	129530961	129530961	G	C	RHO	c.447G>C	p.Gly149Gly	synonymous_variant	LOW	60	0	0.02	70	19	0.285	5.36448
Aplan-CEM-ATC25-C1_vs_Aplan-CEM-PreTreatment	chr3	130395161	130395162	TA	T	COL6A5	c.3270delA	p.Val1091fs	frameshift_variant	HIGH	59	0	0.019	66	19	0.271	5.85855
Aplan-CEM-ATC25-C1_vs_Aplan-CEM-PreTreatment	chr3	130565398	130565398	C	G	COL6A6	c.1066C>G	p.Arg356Gly	missense_variant	MODERATE	59	0	0.017	75	20	0.312	5.54852
Aplan-CEM-ATC25-C1_vs_Aplan-CEM-PreTreatment	chr3	131723532	131723532	G	C	CPNE4	c.328C>G	p.Arg110Gly	missense_variant	MODERATE	35	0	0.03	53	17	0.372	4.21932
Aplan-CEM-ATC25-C1_vs_Aplan-CEM-PreTreatment	chr3	132447375	132447375	G	T	DNAJC13	c.199G>T	p.Glu67*	stop_gained	HIGH	42	0	0.027	58	14	0.28	3.578
Aplan-CEM-ATC25-C1_vs_Aplan-CEM-PreTreatment	chr3	133390269	133390269	A	G	TMEM108	c.1540A>G	p.Met514Val	missense_variant	MODERATE	38	0	0.03	48	19	0.366	5.61705
Aplan-CEM-ATC25-C1_vs_Aplan-CEM-PreTreatment	chr3	133757869	133757869	T	TC	TF	c.978dupC	p.Arg327fs	frameshift_variant	HIGH	41	0	0.025	44	11	0.282	3.29452
Aplan-CEM-ATC25-C1_vs_Aplan-CEM-PreTreatment	chr3	134604001	134604001	C	T	KY	c.1564G>A	p.Glu522Lys	missense_variant	MODERATE	62	0	0.018	79	21	0.267	5.83103
Aplan-CEM-ATC25-C1_vs_Aplan-CEM-PreTreatment	chr3	135192598	135192598	G	C	EPHB1	c.1905G>C	p.Lys635Asn	missense_variant	MODERATE	44	0	0.024	82	20	0.236	3.80669
Aplan-CEM-ATC25-C1_vs_Aplan-CEM-PreTreatment	chr3	138173591	138173591	G	A	DBR1	c.233C>T	p.Thr78Met	missense_variant	MODERATE	41	0	0.029	38	21	0.581	6.64821
Aplan-CEM-ATC25-C1_vs_Aplan-CEM-PreTreatment	chr3	138472509	138472509	T	C	ESYT3	c.1887T>C	p.Cys629Cys	synonymous_variant	LOW	59	0	0.017	74	21	0.309	5.93141
Aplan-CEM-ATC25-C1_vs_Aplan-CEM-PreTreatment	chr3	142524057	142524057	G	C	ATR	c.4088C>G	p.Ala1363Gly	missense_variant	MODERATE	68	0	0.019	59	18	0.302	6.70183
Aplan-CEM-ATC25-C1_vs_Aplan-CEM-PreTreatment	chr3	142669473	142669473	G	C	PLS1	c.154G>C	p.Val52Leu	missense_variant	MODERATE	34	0	0.034	32	6	0.269	2.00115
Aplan-CEM-ATC25-C1_vs_Aplan-CEM-PreTreatment	chr3	143034978	143034978	A	G	U2SURP	c.1941+3A>G		splice_region_variant&intron_variant	LOW	14	0	0.067	24	11	0.462	2.59281
Aplan-CEM-ATC25-C1_vs_Aplan-CEM-PreTreatment	chr3	143122049	143122050	GC	G	CHST2	c.1238delC	p.Pro413fs	frameshift_variant	HIGH	43	0	0.021	54	12	0.224	3.02761
Aplan-CEM-ATC25-C1_vs_Aplan-CEM-PreTreatment	chr3	148840690	148840690	C	G	CPB1	c.277C>G	p.Leu93Val	missense_variant	MODERATE	34	0	0.034	46	16	0.317	4.39764
Aplan-CEM-ATC25-C1_vs_Aplan-CEM-PreTreatment	chr3	149572930	149572930	G	A	WWTR1	c.502C>T	p.Leu168Phe	missense_variant	MODERATE	44	0	0.027	85	18	0.203	3.47878
Aplan-CEM-ATC25-C1_vs_Aplan-CEM-PreTreatment	chr3	149750719	149750719	G	T	COMMD2	c.361C>A	p.Leu121Ile	missense_variant	MODERATE	26	0	0.038	41	9	0.222	2.01034
Aplan-CEM-ATC25-C1_vs_Aplan-CEM-PreTreatment	chr3	150742546	150742546	G	C	SIAH2	c.570C>G	p.His190Gln	missense_variant	MODERATE	50	0	0.023	59	13	0.241	3.7252
Aplan-CEM-ATC25-C1_vs_Aplan-CEM-PreTreatment	chr3	155485483	155485483	C	T	PLCH1	c.2871G>A	p.Leu957Leu	synonymous_variant	LOW	31	0	0.035	43	9	0.225	2.07812
Aplan-CEM-ATC25-C1_vs_Aplan-CEM-PreTreatment	chr3	155549865	155549865	C	G	PLCH1	c.1248G>C	p.Leu416Leu	synonymous_variant	LOW	25	0	0.039	38	11	0.312	2.66493
Aplan-CEM-ATC25-C1_vs_Aplan-CEM-PreTreatment	chr3	156120705	156120705	G	A	KCNAB1	c.94G>A	p.Asp32Asn	missense_variant	MODERATE	66	0	0.018	72	16	0.218	4.8283
Aplan-CEM-ATC25-C1_vs_Aplan-CEM-PreTreatment	chr3	156523838	156523838	G	C	KCNAB1	c.972G>C	p.Trp324Cys	missense_variant	MODERATE	27	0	0.038	49	21	0.422	4.64525
Aplan-CEM-ATC25-C1_vs_Aplan-CEM-PreTreatment	chr3	157149324	157149324	T	C	CCNL1	c.1195A>G	p.Thr399Ala	missense_variant	MODERATE	37	0	0.033	37	12	0.333	3.77253
Aplan-CEM-ATC25-C1_vs_Aplan-CEM-PreTreatment	chr3	158732318	158732318	G	A	RARRES1	c.98C>T	p.Pro33Leu	missense_variant	MODERATE	41	0	0.025	80	33	0.406	6.09589
Aplan-CEM-ATC25-C1_vs_Aplan-CEM-PreTreatment	chr3	160419502	160419502	G	GA	SMC4	c.1824dupA	p.Ser609fs	frameshift_variant	HIGH	23	0	0.041	45	26	0.538	6.18556
Aplan-CEM-ATC25-C1_vs_Aplan-CEM-PreTreatment	chr3	161101137	161101137	A	G	B3GALNT1	c.-35+2T>C		splice_donor_variant&intron_variant	HIGH	25	0	0.045	27	17	0.619	6.36281
Aplan-CEM-ATC25-C1_vs_Aplan-CEM-PreTreatment	chr3	167604411	167604411	C	G	WDR49	c.-8G>C	p.S339T	5_prime_UTR_premature_start_codon_gain_variant	LOW	42	0	0.027	83	19	0.227	3.49809
Aplan-CEM-ATC25-C1_vs_Aplan-CEM-PreTreatment	chr3	169833058	169833058	C	G	LRRIQ4	c.1405C>G	p.Leu469Val	missense_variant	MODERATE	25	0	0.04	56	39	0.715	6.14246
Aplan-CEM-ATC25-C1_vs_Aplan-CEM-PreTreatment	chr3	171101578	171101578	C	T	TNIK	c.2462G>A	p.Arg821His	missense_variant	MODERATE	52	0	0.023	74	28	0.371	5.81929
Aplan-CEM-ATC25-C1_vs_Aplan-CEM-PreTreatment	chr3	179742337	179742337	G	C	USP13	c.1521G>C	p.Ala507Ala	synonymous_variant	LOW	45	0	0.023	58	14	0.26	3.67497
Aplan-CEM-ATC25-C1_vs_Aplan-CEM-PreTreatment	chr3	180947847	180947847	A	AT	FXR1	c.199-9dupT		splice_region_variant&intron_variant	LOW	12	0	0.077	27	14	0.543	2.58733
Aplan-CEM-ATC25-C1_vs_Aplan-CEM-PreTreatment	chr3	183338800	183338800	C	A	MCF2L2	c.486G>T	p.Pro162Pro	splice_region_variant&synonymous_variant	LOW	20	0	0.056	33	13	0.355	3.10147
Aplan-CEM-ATC25-C1_vs_Aplan-CEM-PreTreatment	chr3	183762175	183762175	T	C	YEATS2	c.1843T>C	p.Tyr615His	missense_variant	MODERATE	71	0	0.017	88	25	0.286	6.75772
Aplan-CEM-ATC25-C1_vs_Aplan-CEM-PreTreatment	chr3	183947468	183947469	CA	C	ABCC5	c.3269delT	p.Leu1090fs	frameshift_variant	HIGH	41	1	0.048	58	24	0.388	5.43656
Aplan-CEM-ATC25-C1_vs_Aplan-CEM-PreTreatment	chr3	184241521	184241521	G	C	VWA5B2	c.3212G>C	p.Arg1071Pro	missense_variant	MODERATE	57	0	0.018	93	19	0.232	4.17695
Aplan-CEM-ATC25-C1_vs_Aplan-CEM-PreTreatment	chr3	184243798	184243798	A	G	ALG3	c.925T>C	p.Trp309Arg	missense_variant	MODERATE	56	0	0.02	82	22	0.267	5.29882
Aplan-CEM-ATC25-C1_vs_Aplan-CEM-PreTreatment	chr3	184245306	184245306	G	C	ALG3	c.497C>G	p.Ser166Cys	missense_variant	MODERATE	57	0	0.019	94	22	0.247	4.77054
Aplan-CEM-ATC25-C1_vs_Aplan-CEM-PreTreatment	chr3	184352046	184352046	G	C	CLCN2	c.2382C>G	p.Pro794Pro	synonymous_variant	LOW	34	0	0.031	44	12	0.237	3.10343
Aplan-CEM-ATC25-C1_vs_Aplan-CEM-PreTreatment	chr3	184386682	184386683	AG	A	CHRD	c.2127delG	p.Gln710fs	frameshift_variant	HIGH	56	0	0.02	91	47	0.518	5.87537
Aplan-CEM-ATC25-C1_vs_Aplan-CEM-PreTreatment	chr3	184573007	184573007	G	C	EPHB3	c.687G>C	p.Ala229Ala	synonymous_variant	LOW	90	0	0.013	123	29	0.228	6.03283
Aplan-CEM-ATC25-C1_vs_Aplan-CEM-PreTreatment	chr3	187043137	187043137	G	C	ST6GAL1	c.434G>C	p.R145P	structural_interaction_variant	HIGH	72	0	0.015	97	21	0.229	5.3163
Aplan-CEM-ATC25-C1_vs_Aplan-CEM-PreTreatment	chr3	187698869	187698869	G	A	RTP2	c.307C>T	p.Arg103Trp	missense_variant	MODERATE	67	0	0.016	100	25	0.258	5.65398
Aplan-CEM-ATC25-C1_vs_Aplan-CEM-PreTreatment	chr3	188872693	188872693	C	T	LPP	c.1640C>T	p.Pro547Leu	missense_variant	MODERATE	45	0	0.025	39	21	0.531	6.6736
Aplan-CEM-ATC25-C1_vs_Aplan-CEM-PreTreatment	chr3	189894446	189894446	T	C	TP63	c.1987T>C	p.Phe663Leu	missense_variant	MODERATE	58	0	0.02	96	29	0.317	6.18661
Aplan-CEM-ATC25-C1_vs_Aplan-CEM-PreTreatment	chr3	192408431	192408431	G	C	FGF12	c.-208C>G		5_prime_UTR_premature_start_codon_gain_variant	LOW	44	0	0.025	78	23	0.319	4.84574
Aplan-CEM-ATC25-C1_vs_Aplan-CEM-PreTreatment	chr3	195868006	195868006	G	A	TNK2	c.2481C>T	p.Pro827Pro	synonymous_variant	LOW	63	0	0.017	104	30	0.301	6.47441
Aplan-CEM-ATC25-C1_vs_Aplan-CEM-PreTreatment	chr3	195870380	195870380	T	C	TNK2	c.1641-175A>G		sequence_feature	LOW	43	0	0.026	70	33	0.498	6.54962
Aplan-CEM-ATC25-C1_vs_Aplan-CEM-PreTreatment	chr3	196561337	196561337	G	A	WDR53	c.139C>T	p.Arg47Trp	missense_variant	MODERATE	68	0	0.015	114	34	0.286	6.1454
Aplan-CEM-ATC25-C1_vs_Aplan-CEM-PreTreatment	chr3	196654588	196654588	G	C	NRROS	c.49G>C	p.Val17Leu	missense_variant	MODERATE	20	0	0.045	27	10	0.391	2.59505
Aplan-CEM-ATC25-C1_vs_Aplan-CEM-PreTreatment	chr3	196947488	196947488	C	CG	PIGZ	c.1408dupC	p.Arg470fs	frameshift_variant	HIGH	64	0	0.017	131	28	0.207	5.23127
Aplan-CEM-ATC25-C1_vs_Aplan-CEM-PreTreatment	chr3	197006740	197006740	A	AG	MELTF	c.1751-5dupC		splice_region_variant&intron_variant	LOW	36	0	0.027	61	11	0.217	2.21487
Aplan-CEM-ATC25-C1_vs_Aplan-CEM-PreTreatment	chr3	197750072	197750072	T	C	FYTTD1	c.101T>C	p.Leu34Ser	missense_variant&splice_region_variant	MODERATE	26	0	0.042	21	11	0.474	4.69355
Aplan-CEM-ATC25-C1_vs_Aplan-CEM-PreTreatment	chr4	507557	507557	C	G	PIGG	c.723C>G	p.Ser241Arg	missense_variant	MODERATE	43	0	0.028	56	22	0.404	6.19126
Aplan-CEM-ATC25-C1_vs_Aplan-CEM-PreTreatment	chr4	523520	523520	C	G	PIGG	c.1676C>G	p.Ala559Gly	missense_variant	MODERATE	36	0	0.029	54	20	0.356	4.96855
Aplan-CEM-ATC25-C1_vs_Aplan-CEM-PreTreatment	chr4	664220	664220	A	G	PDE6B	c.2128A>G	p.Met710Val	missense_variant&splice_region_variant	MODERATE	24	0	0.05	25	8	0.32	2.39479
Aplan-CEM-ATC25-C1_vs_Aplan-CEM-PreTreatment	chr4	1718291	1718291	C	G	TMEM129	c.541G>C	p.Val181Leu	missense_variant	MODERATE	54	0	0.02	115	39	0.3	6.00379
Aplan-CEM-ATC25-C1_vs_Aplan-CEM-PreTreatment	chr4	1723720	1723720	C	G	TACC3	c.163-8C>G		splice_region_variant&intron_variant	LOW	48	0	0.021	77	16	0.227	3.61369
Aplan-CEM-ATC25-C1_vs_Aplan-CEM-PreTreatment	chr4	1801673	1801673	C	T	FGFR3	c.669C>T	p.Arg223Arg	synonymous_variant	LOW	79	0	0.013	100	28	0.288	6.32765
Aplan-CEM-ATC25-C1_vs_Aplan-CEM-PreTreatment	chr4	1805666	1805666	G	A	FGFR3	c.1648G>A	p.Gly550Ser	missense_variant	MODERATE	44	0	0.023	56	26	0.446	6.35277
Aplan-CEM-ATC25-C1_vs_Aplan-CEM-PreTreatment	chr4	1806597	1806597	G	C	FGFR3	c.2088G>C	p.Pro696Pro	synonymous_variant	LOW	66	0	0.017	62	15	0.259	5.15239
Aplan-CEM-ATC25-C1_vs_Aplan-CEM-PreTreatment	chr4	1841682	1841682	G	A	LETM1	c.259C>T	p.Pro87Ser	missense_variant	MODERATE	51	0	0.022	80	25	0.304	5.93147
Aplan-CEM-ATC25-C1_vs_Aplan-CEM-PreTreatment	chr4	2072188	2072188	T	C	POLN	c.2629A>G	p.Ser877Gly	missense_variant	MODERATE	46	0	0.025	58	13	0.211	3.34606
Aplan-CEM-ATC25-C1_vs_Aplan-CEM-PreTreatment	chr4	2251137	2251137	C	T	MXD4	c.419G>A	p.Arg140His	missense_variant	MODERATE	59	0	0.019	92	19	0.222	4.22389
Aplan-CEM-ATC25-C1_vs_Aplan-CEM-PreTreatment	chr4	2693796	2693796	A	G	FAM193A	c.3014A>G	p.Asp1005Gly	missense_variant	MODERATE	52	0	0.022	78	18	0.243	4.31895
Aplan-CEM-ATC25-C1_vs_Aplan-CEM-PreTreatment	chr4	2744847	2744847	G	A	TNIP2	c.756C>T	p.His252His	synonymous_variant	LOW	57	0	0.02	80	24	0.275	6.01615
Aplan-CEM-ATC25-C1_vs_Aplan-CEM-PreTreatment	chr4	2744913	2744913	G	C	TNIP2	c.690C>G	p.Tyr230*	stop_gained	HIGH	62	0	0.02	72	23	0.291	5.9125
Aplan-CEM-ATC25-C1_vs_Aplan-CEM-PreTreatment	chr4	5446698	5446698	G	C	STK32B	c.588G>C	p.Met196Ile	missense_variant	MODERATE	22	0	0.045	59	20	0.306	3.0268
Aplan-CEM-ATC25-C1_vs_Aplan-CEM-PreTreatment	chr4	5797168	5797168	G	A	EVC	c.2033G>A	p.Arg678His	missense_variant	MODERATE	17	0	0.059	55	26	0.468	3.57573
Aplan-CEM-ATC25-C1_vs_Aplan-CEM-PreTreatment	chr4	6112798	6112798	G	C	JAKMIP1	c.53C>G	p.Ala18Gly	missense_variant	MODERATE	47	0	0.024	67	22	0.334	5.46213
Aplan-CEM-ATC25-C1_vs_Aplan-CEM-PreTreatment	chr4	6347921	6347921	C	G	PPP2R2C	c.715G>C	p.Val239Leu	missense_variant	MODERATE	48	0	0.023	71	26	0.339	6.41374
Aplan-CEM-ATC25-C1_vs_Aplan-CEM-PreTreatment	chr4	6597184	6597184	G	A	MAN2B2	c.1129G>A	p.Ala377Thr	missense_variant	MODERATE	50	0	0.022	69	36	0.517	6.29387
Aplan-CEM-ATC25-C1_vs_Aplan-CEM-PreTreatment	chr4	7054423	7054423	G	C	TADA2B	c.632G>C	p.Arg211Pro	missense_variant	MODERATE	94	0	0.011	110	24	0.223	5.98209
Aplan-CEM-ATC25-C1_vs_Aplan-CEM-PreTreatment	chr4	20531978	20531978	C	G	SLIT2	c.1626-6C>G		splice_region_variant&intron_variant	LOW	11	0	0.083	20	10	0.474	2.31002
Aplan-CEM-ATC25-C1_vs_Aplan-CEM-PreTreatment	chr4	30723956	30723956	A	T	PCDH7	c.2534A>T	p.Asn845Ile	missense_variant	MODERATE	42	0	0.025	83	38	0.443	5.98922
Aplan-CEM-ATC25-C1_vs_Aplan-CEM-PreTreatment	chr4	37439084	37439084	C	G	NWD2	c.990C>G	p.Tyr330*	stop_gained	HIGH	49	0	0.024	76	14	0.203	3.10098
Aplan-CEM-ATC25-C1_vs_Aplan-CEM-PreTreatment	chr4	37446177	37446177	G	C	NWD2	c.4189G>C	p.Gly1397Arg	missense_variant	MODERATE	63	0	0.017	116	33	0.295	6.6036
Aplan-CEM-ATC25-C1_vs_Aplan-CEM-PreTreatment	chr4	37631420	37631420	G	C	RELL1	c.784C>G	p.Pro262Ala	missense_variant	MODERATE	47	0	0.023	76	20	0.254	4.58986
Aplan-CEM-ATC25-C1_vs_Aplan-CEM-PreTreatment	chr4	37855678	37855678	G	A	PGM2	c.1673G>A	p.Arg558His	missense_variant	MODERATE	40	0	0.032	50	32	0.659	6.33968
Aplan-CEM-ATC25-C1_vs_Aplan-CEM-PreTreatment	chr4	40102532	40102532	G	C	N4BP2	c.687G>C	p.Lys229Asn	missense_variant	MODERATE	53	0	0.019	72	21	0.293	5.51548
Aplan-CEM-ATC25-C1_vs_Aplan-CEM-PreTreatment	chr4	40142800	40142800	G	A	N4BP2	c.4913G>A	p.Ser1638Asn	missense_variant	MODERATE	41	0	0.025	58	34	0.539	5.94835
Aplan-CEM-ATC25-C1_vs_Aplan-CEM-PreTreatment	chr4	40243697	40243697	G	A	RHOH	c.311G>A	p.Ser104Asn	missense_variant	MODERATE	64	0	0.016	96	22	0.241	5.17995
Aplan-CEM-ATC25-C1_vs_Aplan-CEM-PreTreatment	chr4	40432695	40432695	C	G	RBM47	c.1498G>C	p.Ala500Pro	missense_variant	MODERATE	55	0	0.019	95	21	0.227	4.42251
Aplan-CEM-ATC25-C1_vs_Aplan-CEM-PreTreatment	chr4	40438516	40438516	G	C	RBM47	c.378C>G	p.Arg126Arg	synonymous_variant	LOW	78	0	0.014	138	34	0.258	6.60581
Aplan-CEM-ATC25-C1_vs_Aplan-CEM-PreTreatment	chr4	41631411	41631411	C	T	LIMCH1	c.1535C>T	p.Ser512Phe	missense_variant	MODERATE	44	0	0.024	89	51	0.577	5.92404
Aplan-CEM-ATC25-C1_vs_Aplan-CEM-PreTreatment	chr4	44448222	44448222	C	A	KCTD8	c.302G>T	p.Arg101Leu	missense_variant	MODERATE	36	0	0.03	47	12	0.258	3.07366
Aplan-CEM-ATC25-C1_vs_Aplan-CEM-PreTreatment	chr4	48490898	48490898	G	C	ZAR1	c.607G>C	p.Glu203Gln	missense_variant	MODERATE	54	0	0.019	62	14	0.241	4.09773
Aplan-CEM-ATC25-C1_vs_Aplan-CEM-PreTreatment	chr4	54100875	54100875	C	A	GSX2	c.531C>A	p.Thr177Thr	synonymous_variant	LOW	37	0	0.028	49	14	0.273	3.72447
Aplan-CEM-ATC25-C1_vs_Aplan-CEM-PreTreatment	chr4	56314250	56314250	G	C	KIAA1211	c.748G>C	p.Glu250Gln	missense_variant	MODERATE	75	0	0.014	70	23	0.328	6.60614
Aplan-CEM-ATC25-C1_vs_Aplan-CEM-PreTreatment	chr4	56345245	56345245	T	C	AASDH	c.2534A>G	p.Glu845Gly	missense_variant	MODERATE	25	0	0.042	30	13	0.429	4.06495
Aplan-CEM-ATC25-C1_vs_Aplan-CEM-PreTreatment	chr4	56446782	56446782	G	C	PAICS	c.323G>C	p.Arg108Thr	missense_variant	MODERATE	21	0	0.05	27	10	0.423	2.59226
Aplan-CEM-ATC25-C1_vs_Aplan-CEM-PreTreatment	chr4	56467653	56467654	CG	C	SRP72	c.25delG	p.Val9fs	frameshift_variant	HIGH	80	0	0.014	66	11	0.208	4.00801
Aplan-CEM-ATC25-C1_vs_Aplan-CEM-PreTreatment	chr4	67558763	67558763	C	G	STAP1	c.-47C>G		5_prime_UTR_premature_start_codon_gain_variant	LOW	36	0	0.029	51	16	0.325	3.98342
Aplan-CEM-ATC25-C1_vs_Aplan-CEM-PreTreatment	chr4	69596281	69596281	A	G	UGT2A2	c.992T>C	p.Ile331Thr	missense_variant	MODERATE	91	0	0.013	147	31	0.211	6.41229
Aplan-CEM-ATC25-C1_vs_Aplan-CEM-PreTreatment	chr4	71567030	71567030	C	G	SLC4A4	c.3126C>G	p.Asn1042Lys	missense_variant	MODERATE	23	0	0.048	35	10	0.323	2.38846
Aplan-CEM-ATC25-C1_vs_Aplan-CEM-PreTreatment	chr4	72032024	72032024	G	C	NPFFR2	c.123G>C	p.Gly41Gly	synonymous_variant	LOW	62	0	0.02	81	24	0.31	6.50713
Aplan-CEM-ATC25-C1_vs_Aplan-CEM-PreTreatment	chr4	72548727	72548727	C	G	ADAMTS3	c.255G>C	p.Thr85Thr	synonymous_variant	LOW	61	0	0.018	78	26	0.343	5.88872
Aplan-CEM-ATC25-C1_vs_Aplan-CEM-PreTreatment	chr4	73415078	73415078	G	C	ALB	c.1102G>C	p.Val368Leu	missense_variant	MODERATE	23	0	0.043	53	17	0.325	2.75249
Aplan-CEM-ATC25-C1_vs_Aplan-CEM-PreTreatment	chr4	73484391	73484391	G	C	AFM	c.270+1G>C		splice_donor_variant&intron_variant	HIGH	29	0	0.034	42	13	0.302	3.32069
Aplan-CEM-ATC25-C1_vs_Aplan-CEM-PreTreatment	chr4	76353210	76353211	GT	G	CCDC158	c.2357delA	p.Asn786fs	frameshift_variant	HIGH	30	0	0.038	48	13	0.307	2.9304
Aplan-CEM-ATC25-C1_vs_Aplan-CEM-PreTreatment	chr4	76897369	76897369	C	G	SOWAHB	c.481G>C	p.Gly161Arg	missense_variant	MODERATE	80	0	0.014	137	40	0.299	6.05605
Aplan-CEM-ATC25-C1_vs_Aplan-CEM-PreTreatment	chr4	78481827	78481827	C	G	FRAS1	c.8467C>G	p.Arg2823Gly	missense_variant	MODERATE	41	0	0.026	46	19	0.43	5.70767
Aplan-CEM-ATC25-C1_vs_Aplan-CEM-PreTreatment	chr4	78511355	78511356	AC	A	FRAS1	c.9867delC	p.Leu3290fs	frameshift_variant	HIGH	29	0	0.035	78	16	0.227	2.27247
Aplan-CEM-ATC25-C1_vs_Aplan-CEM-PreTreatment	chr4	79984835	79984836	GC	G	ANTXR2	c.1069delG	p.Ala357fs	frameshift_variant	HIGH	34	1	0.064	39	25	0.635	6.39301
Aplan-CEM-ATC25-C1_vs_Aplan-CEM-PreTreatment	chr4	82917276	82917276	G	C	THAP9	c.1064G>C	p.Arg355Pro	missense_variant	MODERATE	54	0	0.019	82	20	0.254	4.61637
Aplan-CEM-ATC25-C1_vs_Aplan-CEM-PreTreatment	chr4	84803471	84803472	TA	T	WDFY3	c.2430-5delT		splice_region_variant&intron_variant	LOW	21	0	0.04	54	33	0.613	6.21994
Aplan-CEM-ATC25-C1_vs_Aplan-CEM-PreTreatment	chr4	85923662	85923662	C	G	ARHGAP24	c.283C>G	p.Arg95Gly	missense_variant	MODERATE	40	0	0.024	57	14	0.26	3.52216
Aplan-CEM-ATC25-C1_vs_Aplan-CEM-PreTreatment	chr4	85942096	85942096	T	C	ARHGAP24	c.422T>C	p.Val141Ala	missense_variant	MODERATE	47	0	0.023	75	18	0.265	3.99715
Aplan-CEM-ATC25-C1_vs_Aplan-CEM-PreTreatment	chr4	88121644	88121644	A	G	ABCG2	c.680T>C	p.Leu227Pro	missense_variant	MODERATE	34	0	0.032	38	12	0.305	3.67382
Aplan-CEM-ATC25-C1_vs_Aplan-CEM-PreTreatment	chr4	94249696	94249697	GA	G	SMARCAD1	c.752delA	p.Lys251fs	frameshift_variant	HIGH	22	0	0.053	16	8	0.467	3.57976
Aplan-CEM-ATC25-C1_vs_Aplan-CEM-PreTreatment	chr4	107931775	107931775	G	A	CYP2U1	c.132G>A	p.Ala44Ala	synonymous_variant	LOW	69	0	0.016	95	49	0.512	6.05026
Aplan-CEM-ATC25-C1_vs_Aplan-CEM-PreTreatment	chr4	108167703	108167703	T	C	LEF1	c.65A>G	p.Glu22Gly	missense_variant	MODERATE	39	0	0.029	64	43	0.655	6.45679
Aplan-CEM-ATC25-C1_vs_Aplan-CEM-PreTreatment	chr4	109959476	109959476	G	A	EGF	c.1066+39G>A		sequence_feature	LOW	74	0	0.016	66	30	0.435	6.10383
Aplan-CEM-ATC25-C1_vs_Aplan-CEM-PreTreatment	chr4	112515423	112515423	A	G	NEUROG2	c.53T>C	p.Val18Ala	missense_variant	MODERATE	43	0	0.025	51	16	0.326	4.79019
Aplan-CEM-ATC25-C1_vs_Aplan-CEM-PreTreatment	chr4	114676068	114676068	T	C	UGT8	c.1406T>C	p.Phe469Ser	missense_variant	MODERATE	53	0	0.022	80	40	0.486	6.13814
Aplan-CEM-ATC25-C1_vs_Aplan-CEM-PreTreatment	chr4	121825929	121825929	T	C	BBS7	c.2079A>G	p.Val693Val	synonymous_variant	LOW	34	0	0.033	40	11	0.323	3.20654
Aplan-CEM-ATC25-C1_vs_Aplan-CEM-PreTreatment	chr4	121932685	121932685	T	C	TRPC3	c.573A>G	p.Val191Val	synonymous_variant	LOW	72	0	0.015	126	64	0.478	5.85677
Aplan-CEM-ATC25-C1_vs_Aplan-CEM-PreTreatment	chr4	122230100	122230100	G	A	KIAA1109	c.3212G>A	p.Gly1071Glu	missense_variant	MODERATE	30	0	0.035	69	17	0.228	2.89382
Aplan-CEM-ATC25-C1_vs_Aplan-CEM-PreTreatment	chr4	122315593	122315593	G	C	KIAA1109	c.10444G>C	p.Glu3482Gln	missense_variant	MODERATE	55	0	0.02	49	11	0.209	3.88396
Aplan-CEM-ATC25-C1_vs_Aplan-CEM-PreTreatment	chr4	122827228	122827228	C	G	FGF2	c.453C>G	p.Ser151Arg	missense_variant	MODERATE	32	0	0.036	40	12	0.344	3.14613
Aplan-CEM-ATC25-C1_vs_Aplan-CEM-PreTreatment	chr4	125450850	125450850	G	C	FAT4	c.9834G>C	p.Arg3278Ser	missense_variant	MODERATE	48	0	0.022	83	20	0.243	4.19046
Aplan-CEM-ATC25-C1_vs_Aplan-CEM-PreTreatment	chr4	127706760	127706760	A	G	INTU	c.2062A>G	p.Thr688Ala	missense_variant	MODERATE	56	0	0.019	66	23	0.333	6.08288
Aplan-CEM-ATC25-C1_vs_Aplan-CEM-PreTreatment	chr4	128162293	128162293	G	C	LARP1B	c.1624G>C	p.Val542Leu	missense_variant	MODERATE	22	0	0.047	27	8	0.25	2.24935
Aplan-CEM-ATC25-C1_vs_Aplan-CEM-PreTreatment	chr4	139533336	139533336	G	C	SETD7	c.201C>G	p.A67A	structural_interaction_variant	HIGH	32	0	0.031	50	15	0.333	3.56713
Aplan-CEM-ATC25-C1_vs_Aplan-CEM-PreTreatment	chr4	140563217	140563218	GA	G	UCP1	c.527-7delT		splice_region_variant&intron_variant	LOW	34	1	0.063	42	17	0.409	4.05612
Aplan-CEM-ATC25-C1_vs_Aplan-CEM-PreTreatment	chr4	140676903	140676903	C	T	TBC1D9	c.1050G>A	p.Pro350Pro	synonymous_variant	LOW	46	0	0.024	66	32	0.467	5.94254
Aplan-CEM-ATC25-C1_vs_Aplan-CEM-PreTreatment	chr4	141132498	141132498	G	C	RNF150	c.311C>G	p.Pro104Arg	missense_variant	MODERATE	49	0	0.024	78	24	0.296	5.60225
Aplan-CEM-ATC25-C1_vs_Aplan-CEM-PreTreatment	chr4	143697713	143697713	A	G	FREM3	c.2963T>C	p.Val988Ala	missense_variant	MODERATE	66	0	0.016	59	14	0.26	4.96432
Aplan-CEM-ATC25-C1_vs_Aplan-CEM-PreTreatment	chr4	151104552	151104552	C	T	RPS3A	c.754C>T	p.Arg252*	stop_gained	HIGH	43	0	0.026	49	12	0.26	3.52788
Aplan-CEM-ATC25-C1_vs_Aplan-CEM-PreTreatment	chr4	152975033	152975033	C	T	FHDC1	c.1742C>T	p.Pro581Leu	missense_variant	MODERATE	72	0	0.014	112	30	0.269	6.07615
Aplan-CEM-ATC25-C1_vs_Aplan-CEM-PreTreatment	chr4	153295855	153295855	G	T	TRIM2	c.1329G>T	p.Pro443Pro	synonymous_variant	LOW	101	0	0.011	161	41	0.255	5.92047
Aplan-CEM-ATC25-C1_vs_Aplan-CEM-PreTreatment	chr4	153584850	153584850	A	G	KIAA0922	c.1076A>G	p.Asp359Gly	missense_variant	MODERATE	24	0	0.043	32	11	0.333	2.88447
Aplan-CEM-ATC25-C1_vs_Aplan-CEM-PreTreatment	chr4	153603995	153603995	G	A	KIAA0922	c.2983G>A	p.Ala995Thr	missense_variant	MODERATE	31	0	0.032	71	37	0.547	5.96739
Aplan-CEM-ATC25-C1_vs_Aplan-CEM-PreTreatment	chr4	155710555	155710555	G	T	GUCY1A3	c.390G>T	p.Glu130Asp	missense_variant	MODERATE	20	0	0.059	32	10	0.354	2.07682
Aplan-CEM-ATC25-C1_vs_Aplan-CEM-PreTreatment	chr4	162111348	162111348	C	A	FSTL5	c.49G>T	p.Glu17*	stop_gained	HIGH	23	0	0.059	24	8	0.3	2.40915
Aplan-CEM-ATC25-C1_vs_Aplan-CEM-PreTreatment	chr4	168427242	168427242	G	A	DDX60L	c.1758C>T	p.Asn586Asn	synonymous_variant	LOW	37	0	0.029	58	13	0.265	2.87256
Aplan-CEM-ATC25-C1_vs_Aplan-CEM-PreTreatment	chr4	173528974	173528974	G	C	HAND2	c.316C>G	p.Arg106Gly	missense_variant	MODERATE	38	0	0.028	61	14	0.245	3.13563
Aplan-CEM-ATC25-C1_vs_Aplan-CEM-PreTreatment	chr4	174304235	174304236	CT	C	CEP44	c.385-3delT		splice_region_variant&intron_variant	LOW	51	2	0.066	51	24	0.471	6.31566
Aplan-CEM-ATC25-C1_vs_Aplan-CEM-PreTreatment	chr4	182324051	182324051	T	C	TENM3	c.31T>C	p.Ser11Pro	missense_variant	MODERATE	32	0	0.034	49	27	0.535	5.77744
Aplan-CEM-ATC25-C1_vs_Aplan-CEM-PreTreatment	chr4	182799734	182799734	C	G	TENM3	c.7483C>G	p.Leu2495Val	missense_variant	MODERATE	37	0	0.029	60	14	0.23	3.12763
Aplan-CEM-ATC25-C1_vs_Aplan-CEM-PreTreatment	chr4	183694032	183694032	G	A	TRAPPC11	c.2502G>A	p.Gly834Gly	synonymous_variant	LOW	40	0	0.027	39	27	0.677	6.07068
Aplan-CEM-ATC25-C1_vs_Aplan-CEM-PreTreatment	chr4	184009949	184009949	C	G	STOX2	c.1111C>G	p.Arg371Gly	missense_variant	MODERATE	70	0	0.016	89	28	0.333	5.94921
Aplan-CEM-ATC25-C1_vs_Aplan-CEM-PreTreatment	chr4	185145073	185145073	T	C	SLC25A4	c.421T>C	p.Leu141Leu	synonymous_variant	LOW	44	0	0.026	62	14	0.22	3.5134
Aplan-CEM-ATC25-C1_vs_Aplan-CEM-PreTreatment	chr4	185624241	185624241	G	C	SORBS2	c.1476C>G	p.Cys492Trp	missense_variant	MODERATE	41	0	0.026	56	11	0.235	2.66556
Aplan-CEM-ATC25-C1_vs_Aplan-CEM-PreTreatment	chr4	186555303	186555303	C	G	MTNR1A	c.63G>C	p.Ala21Ala	synonymous_variant	LOW	42	0	0.025	41	8	0.222	2.61575
Aplan-CEM-ATC25-C1_vs_Aplan-CEM-PreTreatment	chr4	188091695	188091695	G	C	TRIML2	c.992C>G	p.Thr331Arg	missense_variant	MODERATE	67	0	0.016	77	21	0.272	6.01755
Aplan-CEM-ATC25-C1_vs_Aplan-CEM-PreTreatment	chr5	2748976	2748976	G	C	IRX2	c.732C>G	p.Arg244Arg	synonymous_variant	LOW	47	0	0.024	91	22	0.231	4.33252
Aplan-CEM-ATC25-C1_vs_Aplan-CEM-PreTreatment	chr5	9224706	9224706	C	T	SEMA5A	c.614G>A	p.Arg205His	missense_variant	MODERATE	38	0	0.028	49	16	0.341	4.45775
Aplan-CEM-ATC25-C1_vs_Aplan-CEM-PreTreatment	chr5	10390316	10390317	CT	C	2022-03-06	c.408-6delT		splice_region_variant&intron_variant	LOW	19	0	0.047	36	20	0.503	4.75749
Aplan-CEM-ATC25-C1_vs_Aplan-CEM-PreTreatment	chr5	10973518	10973518	G	C	CTNND2	c.3613C>G	p.Arg1205Gly	missense_variant	MODERATE	43	0	0.027	77	23	0.281	4.85568
Aplan-CEM-ATC25-C1_vs_Aplan-CEM-PreTreatment	chr5	13714460	13714460	G	A	DNAH5	c.13070C>T	p.Ala4357Val	missense_variant	MODERATE	43	0	0.026	68	31	0.407	6.26223
Aplan-CEM-ATC25-C1_vs_Aplan-CEM-PreTreatment	chr5	13765974	13765974	A	G	DNAH5	c.10101+2T>C		splice_donor_variant&intron_variant	HIGH	34	0	0.03	40	11	0.278	3.20654
Aplan-CEM-ATC25-C1_vs_Aplan-CEM-PreTreatment	chr5	16672739	16672739	T	C	MYO10	c.5292A>G	p.Lys1764Lys	synonymous_variant	LOW	35	0	0.033	48	15	0.292	4.00313
Aplan-CEM-ATC25-C1_vs_Aplan-CEM-PreTreatment	chr5	16761531	16761531	G	C	MYO10	c.1672C>G	p.Arg558Gly	missense_variant	MODERATE	19	0	0.048	33	13	0.394	2.75404
Aplan-CEM-ATC25-C1_vs_Aplan-CEM-PreTreatment	chr5	32230123	32230123	C	T	MTMR12	c.1899G>A	p.Gly633Gly	synonymous_variant	LOW	77	0	0.014	90	51	0.563	5.82529
Aplan-CEM-ATC25-C1_vs_Aplan-CEM-PreTreatment	chr5	32712522	32712522	G	C	NPR3	c.746G>C	p.Arg249Pro	missense_variant	MODERATE	27	0	0.04	53	14	0.295	2.74158
Aplan-CEM-ATC25-C1_vs_Aplan-CEM-PreTreatment	chr5	34824271	34824271	C	G	RAI14	c.2438C>G	p.Ser813Cys	missense_variant	MODERATE	43	0	0.025	60	21	0.333	5.6345
Aplan-CEM-ATC25-C1_vs_Aplan-CEM-PreTreatment	chr5	35010044	35010044	G	C	AGXT2	c.1294C>G	p.Arg432Gly	missense_variant	MODERATE	42	0	0.027	73	24	0.351	5.26031
Aplan-CEM-ATC25-C1_vs_Aplan-CEM-PreTreatment	chr5	36958165	36958165	G	C	NIPBL	c.292G>C	p.Ala98Pro	missense_variant	MODERATE	37	0	0.033	49	10	0.243	2.38292
Aplan-CEM-ATC25-C1_vs_Aplan-CEM-PreTreatment	chr5	37370925	37370925	G	C	NUP155	c.53C>G	p.Ala18Gly	missense_variant	MODERATE	54	0	0.021	40	9	0.21	3.58995
Aplan-CEM-ATC25-C1_vs_Aplan-CEM-PreTreatment	chr5	39393318	39393318	C	A	DAB2	c.167G>T	p.Gly56Val	missense_variant	MODERATE	42	0	0.03	61	26	0.447	6.61899
Aplan-CEM-ATC25-C1_vs_Aplan-CEM-PreTreatment	chr5	40692286	40692286	G	C	PTGER4	c.1375G>C	p.Gly459Arg	missense_variant	MODERATE	65	0	0.017	97	27	0.287	6.42269
Aplan-CEM-ATC25-C1_vs_Aplan-CEM-PreTreatment	chr5	43292485	43292485	T	C	HMGCS1	c.1462A>G	p.Ile488Val	missense_variant	MODERATE	39	0	0.029	43	16	0.39	5.13924
Aplan-CEM-ATC25-C1_vs_Aplan-CEM-PreTreatment	chr5	43292566	43292566	T	A	HMGCS1	c.1381A>T	p.Lys461*	stop_gained	HIGH	29	0	0.035	53	13	0.286	2.51555
Aplan-CEM-ATC25-C1_vs_Aplan-CEM-PreTreatment	chr5	55941556	55941556	G	C	IL6ST	c.2283C>G	p.Thr761Thr	synonymous_variant	LOW	50	0	0.023	61	18	0.286	5.09087
Aplan-CEM-ATC25-C1_vs_Aplan-CEM-PreTreatment	chr5	58457184	58457184	C	CA	PLK2	c.1004dupT	p.Leu335fs	frameshift_variant	HIGH	19	0	0.047	36	18	0.497	4.16789
Aplan-CEM-ATC25-C1_vs_Aplan-CEM-PreTreatment	chr5	60757579	60757579	C	A	ELOVL7	c.566G>T	p.Gly189Val	missense_variant	MODERATE	39	0	0.033	44	16	0.368	5.05607
Aplan-CEM-ATC25-C1_vs_Aplan-CEM-PreTreatment	chr5	65597133	65597133	C	G	TRIM23	c.1227G>C	p.Thr409Thr	synonymous_variant	LOW	50	0	0.023	70	19	0.317	4.81874
Aplan-CEM-ATC25-C1_vs_Aplan-CEM-PreTreatment	chr5	67100583	67100583	G	C	MAST4	c.1061G>C	p.Arg354Pro	missense_variant	MODERATE	40	0	0.027	81	16	0.22	2.91018
Aplan-CEM-ATC25-C1_vs_Aplan-CEM-PreTreatment	chr5	67183052	67183052	G	C	CD180	c.1791C>G	p.His597Gln	missense_variant	MODERATE	46	0	0.023	69	20	0.288	4.73507
Aplan-CEM-ATC25-C1_vs_Aplan-CEM-PreTreatment	chr5	71626667	71626667	G	A	MCCC2	c.652G>A	p.Ala218Thr	missense_variant	MODERATE	19	0	0.056	31	22	0.654	6.25079
Aplan-CEM-ATC25-C1_vs_Aplan-CEM-PreTreatment	chr5	72460791	72460791	C	T	ZNF366	c.706G>A	p.Val236Met	missense_variant	MODERATE	103	0	0.011	139	34	0.26	6.04675
Aplan-CEM-ATC25-C1_vs_Aplan-CEM-PreTreatment	chr5	75104773	75104773	C	G	ANKRD31	c.4786G>C	p.Gly1596Arg	missense_variant	MODERATE	60	0	0.017	94	26	0.267	6.10732
Aplan-CEM-ATC25-C1_vs_Aplan-CEM-PreTreatment	chr5	77436386	77436386	T	TA	WDR41	c.1101dupT	p.Asn368fs	frameshift_variant	HIGH	50	0	0.025	72	19	0.254	4.75455
Aplan-CEM-ATC25-C1_vs_Aplan-CEM-PreTreatment	chr5	79127964	79127964	A	G	BHMT	c.1018A>G	p.Lys340Glu	missense_variant	MODERATE	95	0	0.012	129	72	0.569	5.87078
Aplan-CEM-ATC25-C1_vs_Aplan-CEM-PreTreatment	chr5	79690063	79690063	C	G	CMYA5	c.149+7C>G		splice_region_variant&intron_variant	LOW	30	0	0.037	43	14	0.297	3.35897
Aplan-CEM-ATC25-C1_vs_Aplan-CEM-PreTreatment	chr5	79729590	79729590	T	C	CMYA5	c.825T>C	p.Asn275Asn	synonymous_variant	LOW	48	0	0.022	46	10	0.214	3.34596
Aplan-CEM-ATC25-C1_vs_Aplan-CEM-PreTreatment	chr5	81092884	81092884	G	C	RASGRF2	c.1474G>C	p.Glu492Gln	missense_variant	MODERATE	44	0	0.027	57	22	0.365	6.1646
Aplan-CEM-ATC25-C1_vs_Aplan-CEM-PreTreatment	chr5	83519362	83519362	A	G	VCAN	c.1056A>G	p.Thr352Thr	synonymous_variant	LOW	36	0	0.029	75	19	0.265	3.5105
Aplan-CEM-ATC25-C1_vs_Aplan-CEM-PreTreatment	chr5	83521819	83521819	G	C	VCAN	c.3513G>C	p.Glu1171Asp	missense_variant	MODERATE	86	0	0.013	89	22	0.259	5.94269
Aplan-CEM-ATC25-C1_vs_Aplan-CEM-PreTreatment	chr5	83539752	83539752	A	C	VCAN	c.6749A>C	p.Glu2250Ala	missense_variant	MODERATE	86	0	0.013	113	26	0.255	6.26114
Aplan-CEM-ATC25-C1_vs_Aplan-CEM-PreTreatment	chr5	90653720	90653720	C	T	ADGRV1	c.4146C>T	p.Tyr1382Tyr	synonymous_variant	LOW	36	0	0.028	54	12	0.217	2.86159
Aplan-CEM-ATC25-C1_vs_Aplan-CEM-PreTreatment	chr5	90745244	90745244	G	A	ADGRV1	c.10748G>A	p.Ser3583Asn	missense_variant	MODERATE	21	0	0.05	30	19	0.679	5.5396
Aplan-CEM-ATC25-C1_vs_Aplan-CEM-PreTreatment	chr5	94870476	94870476	G	C	MCTP1	c.2257C>G	p.Arg753Gly	missense_variant	MODERATE	29	0	0.038	26	6	0.241	2.10008
Aplan-CEM-ATC25-C1_vs_Aplan-CEM-PreTreatment	chr5	97096859	97096859	T	C	LIX1	c.512A>G	p.His171Arg	missense_variant	MODERATE	37	0	0.033	46	10	0.256	2.74014
Aplan-CEM-ATC25-C1_vs_Aplan-CEM-PreTreatment	chr5	109337316	109337316	G	C	PJA2	c.2042C>G	p.Ala681Gly	missense_variant	MODERATE	35	0	0.03	69	21	0.301	4.20373
Aplan-CEM-ATC25-C1_vs_Aplan-CEM-PreTreatment	chr5	112843093	112843093	A	G	APC	c.7499A>G	p.Gln2500Arg	missense_variant	MODERATE	64	0	0.016	88	21	0.228	5.35207
Aplan-CEM-ATC25-C1_vs_Aplan-CEM-PreTreatment	chr5	113434064	113434064	C	T	TSSK1B	c.776G>A	p.Arg259Gln	missense_variant	MODERATE	98	0	0.011	121	55	0.472	6.15513
Aplan-CEM-ATC25-C1_vs_Aplan-CEM-PreTreatment	chr5	113488274	113488274	G	C	MCC	c.141C>G	p.Cys47Trp	missense_variant	MODERATE	50	0	0.023	65	22	0.357	6.00198
Aplan-CEM-ATC25-C1_vs_Aplan-CEM-PreTreatment	chr5	115133947	115133947	T	C	TRIM36	c.1447A>G	p.Thr483Ala	missense_variant	MODERATE	32	0	0.034	71	21	0.31	3.80642
Aplan-CEM-ATC25-C1_vs_Aplan-CEM-PreTreatment	chr5	115962887	115962887	G	A	LVRN	c.270G>A	p.Pro90Pro	synonymous_variant	LOW	78	0	0.014	81	46	0.556	6.29141
Aplan-CEM-ATC25-C1_vs_Aplan-CEM-PreTreatment	chr5	120685991	120685991	A	C	PRR16	c.197A>C	p.Gln66Pro	missense_variant	MODERATE	35	0	0.031	60	15	0.263	3.11599
Aplan-CEM-ATC25-C1_vs_Aplan-CEM-PreTreatment	chr5	121852041	121852041	C	T	FTMT	c.78C>T	p.Phe26Phe	synonymous_variant	LOW	32	0	0.032	58	14	0.231	2.7942
Aplan-CEM-ATC25-C1_vs_Aplan-CEM-PreTreatment	chr5	122077581	122077581	G	C	LOX	c.405C>G	p.Arg135Arg	synonymous_variant	LOW	32	0	0.031	80	25	0.324	4.06431
Aplan-CEM-ATC25-C1_vs_Aplan-CEM-PreTreatment	chr5	123090535	123090535	A	G	PRDM6	c.521A>G	p.Asp174Gly	missense_variant	MODERATE	43	0	0.025	85	32	0.426	6.33225
Aplan-CEM-ATC25-C1_vs_Aplan-CEM-PreTreatment	chr5	124648953	124648953	G	T	ZNF608	c.1431C>A	p.Ser477Arg	missense_variant	MODERATE	59	0	0.018	73	22	0.304	5.78419
Aplan-CEM-ATC25-C1_vs_Aplan-CEM-PreTreatment	chr5	128330680	128330680	G	C	FBN2	c.4238C>G	p.Ser1413Cys	missense_variant	MODERATE	21	0	0.05	29	12	0.36	3.2889
Aplan-CEM-ATC25-C1_vs_Aplan-CEM-PreTreatment	chr5	133980850	133980850	G	A	VDAC1	c.430C>T	p.Leu144Leu	synonymous_variant	LOW	49	0	0.023	87	44	0.5	6.00828
Aplan-CEM-ATC25-C1_vs_Aplan-CEM-PreTreatment	chr5	135449921	135449921	C	T	TIFAB	c.19G>A	p.Val7Ile	missense_variant	MODERATE	67	0	0.016	132	34	0.281	6.44621
Aplan-CEM-ATC25-C1_vs_Aplan-CEM-PreTreatment	chr5	136174377	136174377	T	A	SMAD5	c.999T>A	p.Gly333Gly	splice_region_variant&synonymous_variant	LOW	21	0	0.05	40	13	0.314	2.61852
Aplan-CEM-ATC25-C1_vs_Aplan-CEM-PreTreatment	chr5	137692389	137692389	T	C	KLHL3	c.422A>G	p.Asp141Gly	missense_variant	MODERATE	31	0	0.034	46	11	0.232	2.63552
Aplan-CEM-ATC25-C1_vs_Aplan-CEM-PreTreatment	chr5	138345184	138345184	C	G	FAM53C	c.496C>G	p.Arg166Gly	missense_variant	MODERATE	92	0	0.013	77	16	0.214	5.87152
Aplan-CEM-ATC25-C1_vs_Aplan-CEM-PreTreatment	chr5	138345577	138345577	C	G	FAM53C	c.889C>G	p.Arg297Gly	missense_variant	MODERATE	77	0	0.015	96	24	0.278	6.31946
Aplan-CEM-ATC25-C1_vs_Aplan-CEM-PreTreatment	chr5	138391084	138391084	T	C	KDM3B	c.1452T>C	p.Thr484Thr	synonymous_variant	LOW	64	0	0.018	63	38	0.566	6.21272
Aplan-CEM-ATC25-C1_vs_Aplan-CEM-PreTreatment	chr5	138425549	138425549	C	G	KDM3B	c.4378C>G	p.Arg1460Gly	missense_variant	MODERATE	35	0	0.027	55	13	0.291	2.88979
Aplan-CEM-ATC25-C1_vs_Aplan-CEM-PreTreatment	chr5	138542861	138542861	G	C	ETF1	c.58C>G	p.Leu20Val	missense_variant	MODERATE	52	0	0.022	48	9	0.227	3.0547
Aplan-CEM-ATC25-C1_vs_Aplan-CEM-PreTreatment	chr5	138947270	138947270	G	C	SIL1	c.1254C>G	p.Arg418Arg	synonymous_variant	LOW	51	0	0.023	51	11	0.213	3.27192
Aplan-CEM-ATC25-C1_vs_Aplan-CEM-PreTreatment	chr5	139837787	139837787	G	A	PSD2	c.1823+5G>A		splice_region_variant&intron_variant	LOW	43	0	0.024	60	33	0.545	6.52429
Aplan-CEM-ATC25-C1_vs_Aplan-CEM-PreTreatment	chr5	140363910	140363910	G	A	SLC4A9	c.1326+8G>A		splice_region_variant&intron_variant	LOW	59	0	0.019	52	17	0.312	6.31745
Aplan-CEM-ATC25-C1_vs_Aplan-CEM-PreTreatment	chr5	140529798	140529798	T	C	ANKHD1	c.6850+2T>C		splice_donor_variant&intron_variant	HIGH	111	0	0.01	165	74	0.464	6.08684
Aplan-CEM-ATC25-C1_vs_Aplan-CEM-PreTreatment	chr5	140557438	140557438	G	A	SRA1	c.51C>T	p.Tyr17Tyr	synonymous_variant	LOW	47	0	0.024	53	26	0.48	6.19726
Aplan-CEM-ATC25-C1_vs_Aplan-CEM-PreTreatment	chr5	140672809	140672809	G	C	DND1	c.240C>G	p.Arg80Arg	synonymous_variant	LOW	63	0	0.019	86	25	0.297	6.2663
Aplan-CEM-ATC25-C1_vs_Aplan-CEM-PreTreatment	chr5	140786804	140786804	C	G	PCDHA1	c.514C>G	p.Leu172Val	missense_variant	MODERATE	107	0	0.01	156	46	0.265	6.12294
Aplan-CEM-ATC25-C1_vs_Aplan-CEM-PreTreatment	chr5	140787568	140787568	C	G	PCDHA1	c.1278C>G	p.Thr426Thr	synonymous_variant	LOW	233	0	0.004607	400	107	0.27	5.78705
Aplan-CEM-ATC25-C1_vs_Aplan-CEM-PreTreatment	chr5	140787740	140787740	G	C	PCDHA1	c.1450G>C	p.Ala484Pro	missense_variant	MODERATE	382	0	0.002892	557	136	0.244	5.71906
Aplan-CEM-ATC25-C1_vs_Aplan-CEM-PreTreatment	chr5	140795097	140795097	G	C	PCDHA2	c.133G>C	p.Val45Leu	missense_variant	MODERATE	295	0	0.00393	521	111	0.201	5.65274
Aplan-CEM-ATC25-C1_vs_Aplan-CEM-PreTreatment	chr5	140795103	140795103	C	A	PCDHA2	c.139C>A	p.Arg47Ser	missense_variant	MODERATE	297	1	0.00756	526	115	0.203	5.94193
Aplan-CEM-ATC25-C1_vs_Aplan-CEM-PreTreatment	chr5	140796470	140796470	C	T	PCDHA2	c.1506C>T	p.Arg502Arg	synonymous_variant	LOW	422	1	0.005082	594	152	0.255	5.71423
Aplan-CEM-ATC25-C1_vs_Aplan-CEM-PreTreatment	chr5	140802571	140802571	C	A	PCDHA3	c.1374C>A	p.Ser458Ser	synonymous_variant	LOW	335	0	0.003255	533	127	0.246	5.77909
Aplan-CEM-ATC25-C1_vs_Aplan-CEM-PreTreatment	chr5	140802882	140802882	C	A	PCDHA3	c.1685C>A	p.Ala562Glu	missense_variant	MODERATE	422	0	0.002582	577	119	0.214	5.80842
Aplan-CEM-ATC25-C1_vs_Aplan-CEM-PreTreatment	chr5	140802944	140802944	C	G	PCDHA3	c.1747C>G	p.Arg583Gly	missense_variant	MODERATE	383	0	0.002944	516	110	0.211	5.78339
Aplan-CEM-ATC25-C1_vs_Aplan-CEM-PreTreatment	chr5	140808552	140808552	C	T	PCDHA4	c.1365C>T	p.Phe455Phe	synonymous_variant	LOW	298	0	0.003844	397	97	0.24	5.86132
Aplan-CEM-ATC25-C1_vs_Aplan-CEM-PreTreatment	chr5	140809233	140809233	G	C	PCDHA4	c.2046G>C	p.Ala682Ala	synonymous_variant	LOW	163	0	0.006681	199	55	0.279	6.23745
Aplan-CEM-ATC25-C1_vs_Aplan-CEM-PreTreatment	chr5	140821983	140821983	C	G	PCDHA5	c.208C>G	p.Arg70Gly	missense_variant	MODERATE	303	1	0.003774	446	109	0.247	5.79072
Aplan-CEM-ATC25-C1_vs_Aplan-CEM-PreTreatment	chr5	140823290	140823290	T	C	PCDHA5	c.1515T>C	p.Ser505Ser	synonymous_variant	LOW	415	0	0.002684	597	146	0.26	5.7414
Aplan-CEM-ATC25-C1_vs_Aplan-CEM-PreTreatment	chr5	140823314	140823314	C	T	PCDHA5	c.1539C>T	p.Ser513Ser	synonymous_variant	LOW	423	0	0.002599	634	166	0.271	5.76733
Aplan-CEM-ATC25-C1_vs_Aplan-CEM-PreTreatment	chr5	140829776	140829776	C	G	PCDHA6	c.1685C>G	p.Ala562Gly	missense_variant	MODERATE	308	0	0.003525	545	109	0.204	5.97082
Aplan-CEM-ATC25-C1_vs_Aplan-CEM-PreTreatment	chr5	140835193	140835193	C	G	PCDHA7	c.810C>G	p.Asp270Glu	missense_variant	MODERATE	32	0	0.029	49	10	0.215	2.28896
Aplan-CEM-ATC25-C1_vs_Aplan-CEM-PreTreatment	chr5	140849945	140849945	G	A	PCDHA9	c.1450G>A	p.Ala484Thr	missense_variant	MODERATE	296	0	0.003634	487	231	0.474	5.6013
Aplan-CEM-ATC25-C1_vs_Aplan-CEM-PreTreatment	chr5	140877022	140877022	T	C	PCDHA12	c.1550T>C	p.Val517Ala	missense_variant	MODERATE	403	0	0.002752	678	326	0.472	5.52097
Aplan-CEM-ATC25-C1_vs_Aplan-CEM-PreTreatment	chr5	140883519	140883519	C	T	PCDHA13	c.1251C>T	p.Ser417Ser	synonymous_variant	LOW	243	0	0.004603	381	106	0.275	5.70785
Aplan-CEM-ATC25-C1_vs_Aplan-CEM-PreTreatment	chr5	140884020	140884020	G	C	PCDHA13	c.1752G>C	p.Ser584Ser	synonymous_variant	LOW	266	0	0.0041	411	109	0.272	5.73327
Aplan-CEM-ATC25-C1_vs_Aplan-CEM-PreTreatment	chr5	141136831	141136831	C	G	PCDHB5	c.1397C>G	p.Ala466Gly	missense_variant	MODERATE	424	0	0.002626	722	182	0.249	5.61158
Aplan-CEM-ATC25-C1_vs_Aplan-CEM-PreTreatment	chr5	141188851	141188851	C	G	PCDHB9	c.1533C>G	p.Gly511Gly	synonymous_variant	LOW	461	0	0.002299	747	177	0.239	5.62118
Aplan-CEM-ATC25-C1_vs_Aplan-CEM-PreTreatment	chr5	141319788	141319788	T	C	TAF7	c.257A>G	p.Tyr86Cys	missense_variant	MODERATE	65	0	0.016	107	28	0.25	6.24781
Aplan-CEM-ATC25-C1_vs_Aplan-CEM-PreTreatment	chr5	141344203	141344203	G	C	PCDHGA3	c.170G>C	p.Arg57Pro	missense_variant	MODERATE	73	0	0.015	125	30	0.243	6.35645
Aplan-CEM-ATC25-C1_vs_Aplan-CEM-PreTreatment	chr5	141361659	141361659	C	G	PCDHGB2	c.1524C>G	p.Ser508Arg	missense_variant	MODERATE	140	0	0.007729	257	73	0.284	5.8337
Aplan-CEM-ATC25-C1_vs_Aplan-CEM-PreTreatment	chr5	141366240	141366240	C	T	PCDHGA5	c.1910C>T	p.Ala637Val	missense_variant	MODERATE	232	0	0.004772	386	109	0.292	5.93356
Aplan-CEM-ATC25-C1_vs_Aplan-CEM-PreTreatment	chr5	141366656	141366656	G	C	PCDHGA5	c.2326G>C	p.Ala776Pro	missense_variant	MODERATE	109	0	0.011	171	37	0.214	5.93183
Aplan-CEM-ATC25-C1_vs_Aplan-CEM-PreTreatment	chr5	141371220	141371220	G	A	PCDHGB3	c.826G>A	p.Glu276Lys	missense_variant	MODERATE	57	0	0.019	94	39	0.427	6.14942
Aplan-CEM-ATC25-C1_vs_Aplan-CEM-PreTreatment	chr5	141399376	141399376	A	G	PCDHGB5	c.1249A>G	p.Thr417Ala	missense_variant	MODERATE	43	0	0.025	105	28	0.264	4.44797
Aplan-CEM-ATC25-C1_vs_Aplan-CEM-PreTreatment	chr5	141400003	141400003	C	G	PCDHGB5	c.1876C>G	p.Arg626Gly	missense_variant	MODERATE	147	0	0.007712	275	67	0.252	5.88628
Aplan-CEM-ATC25-C1_vs_Aplan-CEM-PreTreatment	chr5	141418003	141418004	GA	G	PCDHGB7	c.146delA	p.Asn49fs	frameshift_variant	HIGH	100	0	0.012	155	65	0.432	6.14246
Aplan-CEM-ATC25-C1_vs_Aplan-CEM-PreTreatment	chr5	141419436	141419436	G	C	PCDHGB7	c.1577G>C	p.Arg526Pro	missense_variant	MODERATE	128	0	0.008917	218	51	0.245	5.9532
Aplan-CEM-ATC25-C1_vs_Aplan-CEM-PreTreatment	chr5	141422219	141422219	C	G	PCDHGA11	c.992C>G	p.Thr331Ser	missense_variant	MODERATE	51	0	0.022	90	28	0.306	6.02853
Aplan-CEM-ATC25-C1_vs_Aplan-CEM-PreTreatment	chr5	141422834	141422834	G	C	PCDHGA11	c.1607G>C	p.Arg536Pro	missense_variant	MODERATE	118	0	0.008787	172	38	0.236	6.28532
Aplan-CEM-ATC25-C1_vs_Aplan-CEM-PreTreatment	chr5	141477568	141477568	C	T	PCDHGC3	c.1452C>T	p.Pro484Pro	synonymous_variant	LOW	56	0	0.019	73	23	0.298	6.25257
Aplan-CEM-ATC25-C1_vs_Aplan-CEM-PreTreatment	chr5	141639946	141639946	G	A	RELL2	c.530G>A	p.Arg177His	missense_variant	MODERATE	42	0	0.027	61	16	0.315	3.866
Aplan-CEM-ATC25-C1_vs_Aplan-CEM-PreTreatment	chr5	144169906	144169906	C	A	YIPF5	c.50G>T	p.Ser17Ile	missense_variant	MODERATE	28	0	0.042	44	12	0.297	2.64891
Aplan-CEM-ATC25-C1_vs_Aplan-CEM-PreTreatment	chr5	146128747	146128747	A	G	LARS	c.2805T>C	p.His935His	synonymous_variant	LOW	34	0	0.034	48	22	0.474	5.92003
Aplan-CEM-ATC25-C1_vs_Aplan-CEM-PreTreatment	chr5	146455073	146455073	C	G	TCERG1	c.77C>G	p.Ala26Gly	missense_variant	MODERATE	65	0	0.017	74	18	0.254	5.37833
Aplan-CEM-ATC25-C1_vs_Aplan-CEM-PreTreatment	chr5	147901776	147901777	GA	G	C5orf46	c.71-4delT		splice_region_variant&intron_variant	LOW	24	0	0.046	44	19	0.408	4.32212
Aplan-CEM-ATC25-C1_vs_Aplan-CEM-PreTreatment	chr5	148101800	148101800	G	C	SPINK5	c.1322G>C	p.Arg441Pro	missense_variant	MODERATE	37	0	0.029	58	19	0.32	4.51624
Aplan-CEM-ATC25-C1_vs_Aplan-CEM-PreTreatment	chr5	148114464	148114464	A	C	SPINK5	c.1990A>C	p.Lys664Gln	missense_variant	MODERATE	35	0	0.033	69	34	0.474	5.90973
Aplan-CEM-ATC25-C1_vs_Aplan-CEM-PreTreatment	chr5	150167099	150167099	G	C	CDX1	c.223G>C	p.Ala75Pro	missense_variant	MODERATE	28	0	0.034	42	11	0.309	2.6492
Aplan-CEM-ATC25-C1_vs_Aplan-CEM-PreTreatment	chr5	150297254	150297254	A	G	ARSI	c.1670T>C	p.Phe557Ser	missense_variant	MODERATE	65	0	0.017	73	18	0.254	5.43028
Aplan-CEM-ATC25-C1_vs_Aplan-CEM-PreTreatment	chr5	150649978	150649978	G	GC	SYNPO	c.2439dupC	p.Ser814fs	frameshift_variant	HIGH	100	0	0.011	152	43	0.284	6.18726
Aplan-CEM-ATC25-C1_vs_Aplan-CEM-PreTreatment	chr5	151131250	151131251	CT	C	ANXA6	c.775delA	p.Arg259fs	frameshift_variant	HIGH	30	0	0.033	38	16	0.425	4.71571
Aplan-CEM-ATC25-C1_vs_Aplan-CEM-PreTreatment	chr5	151505639	151505639	G	C	FAT2	c.12976C>G	p.Arg4326Gly	missense_variant	MODERATE	49	0	0.022	56	19	0.346	5.52695
Aplan-CEM-ATC25-C1_vs_Aplan-CEM-PreTreatment	chr5	151507457	151507457	G	C	FAT2	c.12214C>G	p.Arg4072Gly	missense_variant	MODERATE	79	0	0.015	109	29	0.289	6.10168
Aplan-CEM-ATC25-C1_vs_Aplan-CEM-PreTreatment	chr5	151527278	151527278	T	C	FAT2	c.10264A>G	p.Asn3422Asp	missense_variant	MODERATE	36	0	0.03	52	32	0.574	5.9152
Aplan-CEM-ATC25-C1_vs_Aplan-CEM-PreTreatment	chr5	159275246	159275246	C	T	UBLCP1	c.684C>T	p.Asp228Asp	splice_region_variant&synonymous_variant	LOW	18	0	0.056	45	15	0.333	2.48115
Aplan-CEM-ATC25-C1_vs_Aplan-CEM-PreTreatment	chr5	163490419	163490419	T	TA	HMMR	c.2001dupA	p.Gln668fs	frameshift_variant	HIGH	16	0	0.058	33	16	0.47	3.16666
Aplan-CEM-ATC25-C1_vs_Aplan-CEM-PreTreatment	chr5	168430206	168430206	G	T	WWC1	c.2070G>T	p.Gln690His	missense_variant	MODERATE	15	0	0.071	45	23	0.514	3.7191
Aplan-CEM-ATC25-C1_vs_Aplan-CEM-PreTreatment	chr5	172093740	172093740	G	T	STK10	c.1226C>A	p.Pro409His	missense_variant	MODERATE	100	0	0.011	92	40	0.451	6.12472
Aplan-CEM-ATC25-C1_vs_Aplan-CEM-PreTreatment	chr5	176493996	176493996	C	T	FAF2	c.484-3C>T		splice_region_variant&intron_variant	LOW	15	0	0.067	19	19	0.952	6.8122
Aplan-CEM-ATC25-C1_vs_Aplan-CEM-PreTreatment	chr5	177204152	177204152	G	A	NSD1	c.1096G>A	p.Val366Met	missense_variant	MODERATE	29	0	0.045	30	30	0.966	6.44804
Aplan-CEM-ATC25-C1_vs_Aplan-CEM-PreTreatment	chr5	177489601	177489601	G	C	PDLIM7	c.661C>G	p.Arg221Gly	missense_variant	MODERATE	19	0	0.053	26	9	0.375	2.23301
Aplan-CEM-ATC25-C1_vs_Aplan-CEM-PreTreatment	chr5	177489606	177489606	G	A	PDLIM7	c.656C>T	p.Thr219Ile	missense_variant	MODERATE	18	0	0.056	27	9	0.375	2.17542
Aplan-CEM-ATC25-C1_vs_Aplan-CEM-PreTreatment	chr5	177491836	177491836	C	A	PDLIM7	c.369G>T	p.Pro123Pro	synonymous_variant	LOW	12	0	0.083	13	7	0.5	2.28255
Aplan-CEM-ATC25-C1_vs_Aplan-CEM-PreTreatment	chr6	564633	564633	G	C	EXOC2	c.1579C>G	p.Arg527Gly	missense_variant	MODERATE	62	0	0.019	62	11	0.203	3.22105
Aplan-CEM-ATC25-C1_vs_Aplan-CEM-PreTreatment	chr6	617704	617704	G	C	EXOC2	c.661+7C>G		splice_region_variant&intron_variant	LOW	46	0	0.025	81	19	0.242	3.88149
Aplan-CEM-ATC25-C1_vs_Aplan-CEM-PreTreatment	chr6	1390611	1390611	C	T	FOXF2	c.664C>T	p.Pro222Ser	missense_variant	MODERATE	60	0	0.019	85	21	0.24	5.31089
Aplan-CEM-ATC25-C1_vs_Aplan-CEM-PreTreatment	chr6	7585543	7585543	G	A	DSP	c.8281G>A	p.Ala2761Thr	missense_variant	MODERATE	80	1	0.027	149	32	0.218	5.22874
Aplan-CEM-ATC25-C1_vs_Aplan-CEM-PreTreatment	chr6	17600922	17600922	T	C	FAM8A1	c.513T>C	p.Tyr171Tyr	synonymous_variant	LOW	28	0	0.035	46	22	0.466	5.5561
Aplan-CEM-ATC25-C1_vs_Aplan-CEM-PreTreatment	chr6	17604932	17604932	A	G	FAM8A1	c.860A>G	p.Tyr287Cys	missense_variant	MODERATE	29	0	0.042	26	11	0.422	4.18996
Aplan-CEM-ATC25-C1_vs_Aplan-CEM-PreTreatment	chr6	22570094	22570094	G	C	HDGFL1	c.519G>C	p.Ala173Ala	synonymous_variant	LOW	56	0	0.02	117	32	0.271	5.94986
Aplan-CEM-ATC25-C1_vs_Aplan-CEM-PreTreatment	chr6	25550911	25550911	C	T	CARMIL1	c.2330C>T	p.Ala777Val	missense_variant&splice_region_variant	MODERATE	15	0	0.067	40	17	0.424	2.65723
Aplan-CEM-ATC25-C1_vs_Aplan-CEM-PreTreatment	chr6	26027241	26027241	G	C	HIST1H4B	c.12C>G	p.Arg4Arg	synonymous_variant	LOW	48	0	0.022	59	11	0.22	3.01047
Aplan-CEM-ATC25-C1_vs_Aplan-CEM-PreTreatment	chr6	26204838	26204838	A	G	HIST1H4E	c.194A>G	p.Asn65Ser	missense_variant	MODERATE	80	0	0.014	63	14	0.25	5.37607
Aplan-CEM-ATC25-C1_vs_Aplan-CEM-PreTreatment	chr6	26234761	26234761	A	G	HIST1H1D	c.173T>C	p.Val58Ala	missense_variant	MODERATE	56	0	0.02	59	26	0.442	6.01103
Aplan-CEM-ATC25-C1_vs_Aplan-CEM-PreTreatment	chr6	26240555	26240555	G	A	HIST1H4F	c.130G>A	p.Val44Met	missense_variant	MODERATE	50	0	0.024	62	40	0.629	6.47396
Aplan-CEM-ATC25-C1_vs_Aplan-CEM-PreTreatment	chr6	27132674	27132674	T	C	HIST1H2BJ	c.77A>G	p.Asp26Gly	missense_variant	MODERATE	212	1	0.005561	308	76	0.241	5.65288
Aplan-CEM-ATC25-C1_vs_Aplan-CEM-PreTreatment	chr6	27400476	27400476	T	C	ZNF391	c.106T>C	p.Ser36Pro	missense_variant	MODERATE	49	0	0.021	66	18	0.245	4.51615
Aplan-CEM-ATC25-C1_vs_Aplan-CEM-PreTreatment	chr6	27400898	27400898	G	A	ZNF391	c.528G>A	p.Arg176Arg	synonymous_variant	LOW	61	0	0.018	80	19	0.243	5.09589
Aplan-CEM-ATC25-C1_vs_Aplan-CEM-PreTreatment	chr6	27400900	27400900	G	C	ZNF391	c.530G>C	p.Ser177Thr	missense_variant	MODERATE	61	0	0.018	80	19	0.243	5.09589
Aplan-CEM-ATC25-C1_vs_Aplan-CEM-PreTreatment	chr6	27452641	27452641	A	T	ZNF184	c.918T>A	p.Tyr306*	stop_gained	HIGH	62	0	0.017	118	52	0.443	6.21358
Aplan-CEM-ATC25-C1_vs_Aplan-CEM-PreTreatment	chr6	27807902	27807902	G	C	HIST1H2BL	c.5C>G	p.Pro2Arg	missense_variant	MODERATE	173	0	0.0062	250	67	0.263	5.89413
Aplan-CEM-ATC25-C1_vs_Aplan-CEM-PreTreatment	chr6	28359770	28359770	G	C	ZKSCAN3	c.184G>C	p.Glu62Gln	missense_variant	MODERATE	121	1	0.00893	222	48	0.217	5.91537
Aplan-CEM-ATC25-C1_vs_Aplan-CEM-PreTreatment	chr6	33667851	33667851	C	G	ITPR3	c.1773C>G	p.Ala591Ala	synonymous_variant	LOW	53	0	0.021	70	16	0.269	4.20792
Aplan-CEM-ATC25-C1_vs_Aplan-CEM-PreTreatment	chr6	34856278	34856278	T	C	UHRF1BP1	c.1160T>C	p.Met387Thr	missense_variant	MODERATE	42	0	0.028	72	30	0.383	6.5162
Aplan-CEM-ATC25-C1_vs_Aplan-CEM-PreTreatment	chr6	35084183	35084183	C	T	ANKS1A	c.3057C>T	p.Leu1019Leu	synonymous_variant	LOW	62	0	0.019	75	41	0.559	6.23721
Aplan-CEM-ATC25-C1_vs_Aplan-CEM-PreTreatment	chr6	35577118	35577118	T	G	FKBP5	c.1142A>C	p.Asn381Thr	missense_variant	MODERATE	40	0	0.027	77	38	0.464	5.98111
Aplan-CEM-ATC25-C1_vs_Aplan-CEM-PreTreatment	chr6	37008857	37008857	G	C	FGD2	c.92G>C	p.Gly31Ala	missense_variant	MODERATE	58	0	0.02	69	35	0.542	6.01999
Aplan-CEM-ATC25-C1_vs_Aplan-CEM-PreTreatment	chr6	38850364	38850364	T	C	DNAH8	c.5313T>C	p.Leu1771Leu	synonymous_variant	LOW	41	0	0.029	37	22	0.611	5.77512
Aplan-CEM-ATC25-C1_vs_Aplan-CEM-PreTreatment	chr6	38860624	38860624	A	G	DNAH8	c.6126A>G	p.Thr2042Thr	synonymous_variant	LOW	32	0	0.03	30	13	0.433	4.8412
Aplan-CEM-ATC25-C1_vs_Aplan-CEM-PreTreatment	chr6	41594950	41594950	C	G	FOXP4	c.1617C>G	p.Asp539Glu	missense_variant	MODERATE	68	0	0.017	107	25	0.23	5.66942
Aplan-CEM-ATC25-C1_vs_Aplan-CEM-PreTreatment	chr6	41907166	41907166	G	C	MED20	c.545C>G	p.Ala182Gly	missense_variant	MODERATE	55	0	0.021	81	23	0.29	5.65212
Aplan-CEM-ATC25-C1_vs_Aplan-CEM-PreTreatment	chr6	42617295	42617295	C	G	UBR2	c.1238C>G	p.Ser413Trp	missense_variant	MODERATE	43	0	0.024	68	30	0.404	5.84593
Aplan-CEM-ATC25-C1_vs_Aplan-CEM-PreTreatment	chr6	42684783	42684783	C	CT	UBR2	c.4776-4dupT		splice_region_variant&intron_variant	LOW	19	0	0.055	34	13	0.374	2.74175
Aplan-CEM-ATC25-C1_vs_Aplan-CEM-PreTreatment	chr6	42721960	42721960	C	G	PRPH2	c.375G>C	p.Ser125Ser	synonymous_variant	LOW	92	0	0.012	103	23	0.231	6.49143
Aplan-CEM-ATC25-C1_vs_Aplan-CEM-PreTreatment	chr6	42857181	42857181	G	C	GLTSCR1L	c.2199G>C	p.Leu733Leu	synonymous_variant	LOW	27	0	0.042	42	11	0.297	2.3223
Aplan-CEM-ATC25-C1_vs_Aplan-CEM-PreTreatment	chr6	42966050	42966050	G	C	PEX6	c.2356C>G	p.Arg786Gly	missense_variant	MODERATE	32	0	0.031	57	14	0.274	2.80894
Aplan-CEM-ATC25-C1_vs_Aplan-CEM-PreTreatment	chr6	43012483	43012483	G	A	MEA1	c.545C>T	p.Pro182Leu	missense_variant	MODERATE	80	0	0.015	109	25	0.25	6.04951
Aplan-CEM-ATC25-C1_vs_Aplan-CEM-PreTreatment	chr6	43051205	43051205	C	T	CUL7	c.1248G>A	p.Gln416Gln	synonymous_variant	LOW	71	0	0.014	87	28	0.32	6.5219
Aplan-CEM-ATC25-C1_vs_Aplan-CEM-PreTreatment	chr6	43056426	43056426	A	G	MRPL2	c.285T>C	p.Gly95Gly	synonymous_variant	LOW	48	0	0.023	59	13	0.213	3.63062
Aplan-CEM-ATC25-C1_vs_Aplan-CEM-PreTreatment	chr6	43065702	43065702	G	C	KLC4	c.625+1G>C		splice_donor_variant&intron_variant	HIGH	30	0	0.042	37	11	0.345	3.15006
Aplan-CEM-ATC25-C1_vs_Aplan-CEM-PreTreatment	chr6	43203501	43203501	C	T	CUL9	c.3934C>T	p.Arg1312Cys	missense_variant	MODERATE	71	0	0.016	108	32	0.281	6.31564
Aplan-CEM-ATC25-C1_vs_Aplan-CEM-PreTreatment	chr6	43283995	43283995	G	A	TTBK1	c.3255G>A	p.Pro1085Pro	synonymous_variant	LOW	61	0	0.017	99	26	0.271	5.59864
Aplan-CEM-ATC25-C1_vs_Aplan-CEM-PreTreatment	chr6	43355465	43355465	C	G	ZNF318	c.1869G>C	p.Lys623Asn	missense_variant	MODERATE	79	0	0.014	113	34	0.314	5.84547
Aplan-CEM-ATC25-C1_vs_Aplan-CEM-PreTreatment	chr6	43446730	43446730	G	C	ABCC10	c.3544+284G>C		sequence_feature	LOW	65	0	0.019	109	51	0.454	6.12778
Aplan-CEM-ATC25-C1_vs_Aplan-CEM-PreTreatment	chr6	44265091	44265091	C	A	NFKBIE	c.673G>T	p.Gly225Trp	missense_variant	MODERATE	71	0	0.015	90	23	0.243	6.03872
Aplan-CEM-ATC25-C1_vs_Aplan-CEM-PreTreatment	chr6	47253318	47253318	G	C	TNFRSF21	c.1447C>G	p.Arg483Gly	missense_variant	MODERATE	61	0	0.019	63	13	0.214	3.90601
Aplan-CEM-ATC25-C1_vs_Aplan-CEM-PreTreatment	chr6	53507538	53507538	T	C	GCLC	c.1026A>G	p.Lys342Lys	synonymous_variant	LOW	20	0	0.063	31	22	0.68	6.77456
Aplan-CEM-ATC25-C1_vs_Aplan-CEM-PreTreatment	chr6	53652124	53652124	G	C	KLHL31	c.1379C>G	p.Ala460Gly	missense_variant	MODERATE	71	0	0.016	75	20	0.261	6.29655
Aplan-CEM-ATC25-C1_vs_Aplan-CEM-PreTreatment	chr6	55277485	55277485	G	T	HCRTR2	c.868G>T	p.Ala290Ser	missense_variant	MODERATE	43	0	0.025	55	13	0.262	3.36267
Aplan-CEM-ATC25-C1_vs_Aplan-CEM-PreTreatment	chr6	70956374	70956374	A	G	B3GAT2	c.56T>C	p.Val19Ala	missense_variant	MODERATE	55	0	0.02	116	58	0.49	5.76047
Aplan-CEM-ATC25-C1_vs_Aplan-CEM-PreTreatment	chr6	72265055	72265055	A	G	RIMS1	c.3194+3A>G		splice_region_variant&intron_variant	LOW	29	0	0.048	26	10	0.409	3.74087
Aplan-CEM-ATC25-C1_vs_Aplan-CEM-PreTreatment	chr6	75119091	75119091	G	A	COL12A1	c.7306C>T	p.Arg2436Trp	missense_variant	MODERATE	53	0	0.021	76	47	0.641	6.13162
Aplan-CEM-ATC25-C1_vs_Aplan-CEM-PreTreatment	chr6	75138340	75138340	A	G	COL12A1	c.5231T>C	p.Leu1744Pro	missense_variant&splice_region_variant	MODERATE	28	0	0.042	55	27	0.5	5.59665
Aplan-CEM-ATC25-C1_vs_Aplan-CEM-PreTreatment	chr6	75142072	75142072	G	C	COL12A1	c.4917C>G	p.Asp1639Glu	missense_variant	MODERATE	34	0	0.032	58	15	0.274	3.1325
Aplan-CEM-ATC25-C1_vs_Aplan-CEM-PreTreatment	chr6	75715474	75715474	C	T	SENP6	c.3219C>T	p.Asn1073Asn	synonymous_variant	LOW	29	0	0.037	43	20	0.454	5.2812
Aplan-CEM-ATC25-C1_vs_Aplan-CEM-PreTreatment	chr6	80010815	80010815	T	C	TTK	c.471T>C	p.Gly157Gly	splice_region_variant&synonymous_variant	LOW	64	0	0.017	68	18	0.246	5.62356
Aplan-CEM-ATC25-C1_vs_Aplan-CEM-PreTreatment	chr6	80010957	80010957	G	C	TTK	c.613G>C	p.Ala205Pro	missense_variant&splice_region_variant	MODERATE	55	0	0.021	66	21	0.286	6.13907
Aplan-CEM-ATC25-C1_vs_Aplan-CEM-PreTreatment	chr6	80027922	80027922	G	A	TTK	c.1432G>A	p.Ala478Thr	missense_variant	MODERATE	35	0	0.032	52	16	0.302	3.9396
Aplan-CEM-ATC25-C1_vs_Aplan-CEM-PreTreatment	chr6	80035076	80035076	G	T	TTK	c.1706G>T	p.Arg569Leu	missense_variant	MODERATE	32	0	0.034	65	19	0.303	3.62325
Aplan-CEM-ATC25-C1_vs_Aplan-CEM-PreTreatment	chr6	83057861	83057861	T	C	UBE3D	c.239A>G	p.His80Arg	missense_variant	MODERATE	47	0	0.023	58	29	0.48	6.25006
Aplan-CEM-ATC25-C1_vs_Aplan-CEM-PreTreatment	chr6	85471389	85471389	G	A	NT5E	c.715G>A	p.V239M	structural_interaction_variant	HIGH	28	0	0.036	40	15	0.378	3.79533
Aplan-CEM-ATC25-C1_vs_Aplan-CEM-PreTreatment	chr6	87255353	87255353	C	T	ZNF292	c.1724C>T	p.Ala575Val	missense_variant	MODERATE	53	0	0.021	89	22	0.271	4.79493
Aplan-CEM-ATC25-C1_vs_Aplan-CEM-PreTreatment	chr6	87256085	87256085	G	A	ZNF292	c.2456G>A	p.Arg819His	missense_variant	MODERATE	56	0	0.019	88	20	0.25	4.55351
Aplan-CEM-ATC25-C1_vs_Aplan-CEM-PreTreatment	chr6	89098817	89098817	T	C	SRSF12	c.547A>G	p.Lys183Glu	missense_variant	MODERATE	64	0	0.018	79	44	0.542	6.35051
Aplan-CEM-ATC25-C1_vs_Aplan-CEM-PreTreatment	chr6	105323770	105323771	TA	T	PREP	c.1214-3delT		splice_region_variant&intron_variant	LOW	16	0	0.054	30	10	0.357	2.05403
Aplan-CEM-ATC25-C1_vs_Aplan-CEM-PreTreatment	chr6	107274204	107274204	G	C	PDSS2	c.455C>G	p.Thr152Arg	missense_variant	MODERATE	22	0	0.045	38	11	0.265	2.33673
Aplan-CEM-ATC25-C1_vs_Aplan-CEM-PreTreatment	chr6	108953347	108953347	G	A	ARMC2	c.1911G>A	p.Thr637Thr	synonymous_variant	LOW	57	0	0.02	67	19	0.283	5.40001
Aplan-CEM-ATC25-C1_vs_Aplan-CEM-PreTreatment	chr6	109426900	109426900	T	C	PPIL6	c.578A>G	p.Tyr193Cys	missense_variant	MODERATE	41	0	0.027	47	24	0.512	6.39385
Aplan-CEM-ATC25-C1_vs_Aplan-CEM-PreTreatment	chr6	110632098	110632098	A	G	CDK19	c.578T>C	p.Val193Ala	missense_variant	MODERATE	48	0	0.026	41	18	0.441	7.1761
Aplan-CEM-ATC25-C1_vs_Aplan-CEM-PreTreatment	chr6	111367287	111367287	A	G	REV3L	c.6501T>C	p.Gly2167Gly	synonymous_variant	LOW	49	1	0.039	65	27	0.446	6.4629
Aplan-CEM-ATC25-C1_vs_Aplan-CEM-PreTreatment	chr6	112349880	112349880	G	C	RFPL4B	c.172G>C	p.Val58Leu	missense_variant	MODERATE	39	0	0.025	79	21	0.239	3.79252
Aplan-CEM-ATC25-C1_vs_Aplan-CEM-PreTreatment	chr6	113970888	113970888	G	A	HDAC2	c.21C>T	p.Gly7Gly	synonymous_variant	LOW	23	0	0.039	49	15	0.318	2.78667
Aplan-CEM-ATC25-C1_vs_Aplan-CEM-PreTreatment	chr6	116253686	116253686	G	C	TSPYL4	c.323C>G	p.Ala108Gly	missense_variant	MODERATE	59	0	0.02	83	22	0.267	5.65625
Aplan-CEM-ATC25-C1_vs_Aplan-CEM-PreTreatment	chr6	116436452	116436452	T	C	DSE	c.1984T>C	p.Tyr662His	missense_variant	MODERATE	108	0	0.01	105	37	0.33	5.96177
Aplan-CEM-ATC25-C1_vs_Aplan-CEM-PreTreatment	chr6	117907795	117907795	G	A	SLC35F1	c.69G>A	p.Val23Val	synonymous_variant	LOW	27	0	0.042	34	17	0.5	5.28496
Aplan-CEM-ATC25-C1_vs_Aplan-CEM-PreTreatment	chr6	121447233	121447233	A	G	GJA1	c.386A>G	p.Gln129Arg	missense_variant	MODERATE	29	0	0.033	53	13	0.26	2.51555
Aplan-CEM-ATC25-C1_vs_Aplan-CEM-PreTreatment	chr6	127475669	127475669	A	G	RP3-403A15.5	c.2357T>C	p.Val786Ala	missense_variant	MODERATE	91	0	0.013	97	24	0.258	6.01774
Aplan-CEM-ATC25-C1_vs_Aplan-CEM-PreTreatment	chr6	132757504	132757504	A	C	VNN2	c.256T>G	p.Trp86Gly	missense_variant	MODERATE	37	0	0.032	65	29	0.45	6.40552
Aplan-CEM-ATC25-C1_vs_Aplan-CEM-PreTreatment	chr6	132757839	132757839	T	C	VNN2	c.45A>G	p.Leu15Leu	synonymous_variant	LOW	33	0	0.031	84	45	0.521	6.39937
Aplan-CEM-ATC25-C1_vs_Aplan-CEM-PreTreatment	chr6	138107128	138107128	G	C	PERP	c.213C>G	p.Tyr71*	stop_gained&splice_region_variant	HIGH	39	0	0.031	67	16	0.233	3.37697
Aplan-CEM-ATC25-C1_vs_Aplan-CEM-PreTreatment	chr6	138433149	138433149	G	C	NHSL1	c.1208C>G	p.Ala403Gly	missense_variant	MODERATE	30	0	0.034	43	12	0.309	3.01469
Aplan-CEM-ATC25-C1_vs_Aplan-CEM-PreTreatment	chr6	139243031	139243031	G	A	TXLNB	c.1550C>T	p.Pro517Leu	missense_variant	MODERATE	55	0	0.018	80	22	0.278	5.31615
Aplan-CEM-ATC25-C1_vs_Aplan-CEM-PreTreatment	chr6	142415011	142415011	A	G	ADGRG6	c.2584A>G	p.Lys862Glu	missense_variant	MODERATE	22	0	0.049	31	10	0.355	2.50884
Aplan-CEM-ATC25-C1_vs_Aplan-CEM-PreTreatment	chr6	145893233	145893233	T	C	SHPRH	c.4868A>G	p.His1623Arg	missense_variant	MODERATE	36	0	0.03	63	17	0.276	3.67184
Aplan-CEM-ATC25-C1_vs_Aplan-CEM-PreTreatment	chr6	151037112	151037112	G	C	MTHFD1L	c.2845G>C	p.Gly949Arg	missense_variant	MODERATE	39	0	0.029	52	15	0.306	4.01552
Aplan-CEM-ATC25-C1_vs_Aplan-CEM-PreTreatment	chr6	151573346	151573346	T	C	CCDC170	c.947T>C	p.Val316Ala	missense_variant	MODERATE	54	0	0.02	78	39	0.5	6.20214
Aplan-CEM-ATC25-C1_vs_Aplan-CEM-PreTreatment	chr6	152122627	152122627	G	A	SYNE1	c.26203C>T	p.Arg8735Trp	missense_variant	MODERATE	55	0	0.022	71	17	0.262	4.56631
Aplan-CEM-ATC25-C1_vs_Aplan-CEM-PreTreatment	chr6	152136645	152136645	C	T	SYNE1	c.25632G>A	p.Leu8544Leu	synonymous_variant	LOW	42	0	0.028	51	24	0.477	6.07472
Aplan-CEM-ATC25-C1_vs_Aplan-CEM-PreTreatment	chr6	152471639	152471639	G	A	SYNE1	c.1590C>T	p.Tyr530Tyr	synonymous_variant	LOW	52	0	0.023	57	15	0.24	4.58276
Aplan-CEM-ATC25-C1_vs_Aplan-CEM-PreTreatment	chr6	157672993	157672993	G	T	ZDHHC14	c.1338G>T	p.Ser446Ser	synonymous_variant	LOW	64	0	0.017	94	22	0.214	5.20073
Aplan-CEM-ATC25-C1_vs_Aplan-CEM-PreTreatment	chr6	160398002	160398002	G	C	SLC22A3	c.453G>C	p.Ala151Ala	synonymous_variant	LOW	26	0	0.046	49	12	0.244	2.22262
Aplan-CEM-ATC25-C1_vs_Aplan-CEM-PreTreatment	chr6	168038702	168038702	G	C	KIF25	c.467G>C	p.Arg156Pro	missense_variant	MODERATE	33	0	0.032	67	18	0.263	3.29406
Aplan-CEM-ATC25-C1_vs_Aplan-CEM-PreTreatment	chr6	168079059	168079059	G	C	FRMD1	c.36C>G	p.Pro12Pro	synonymous_variant	LOW	53	0	0.021	62	16	0.24	4.71584
Aplan-CEM-ATC25-C1_vs_Aplan-CEM-PreTreatment	chr6	168309076	168309076	C	G	DACT2	c.681G>C	p.Pro227Pro	synonymous_variant	LOW	59	0	0.02	80	23	0.264	6.10822
Aplan-CEM-ATC25-C1_vs_Aplan-CEM-PreTreatment	chr7	512417	512417	C	G	PDGFA	c.199G>C	p.Gly67Arg	missense_variant	MODERATE	33	0	0.03	59	14	0.232	2.79431
Aplan-CEM-ATC25-C1_vs_Aplan-CEM-PreTreatment	chr7	740925	740925	A	G	DNAAF5	c.887A>G	p.Asp296Gly	missense_variant	MODERATE	51	0	0.022	83	39	0.5	5.86742
Aplan-CEM-ATC25-C1_vs_Aplan-CEM-PreTreatment	chr7	1470628	1470628	G	C	INTS1	c.6522C>G	p.Ser2174Arg	missense_variant	MODERATE	32	0	0.036	58	15	0.26	3.08886
Aplan-CEM-ATC25-C1_vs_Aplan-CEM-PreTreatment	chr7	1547070	1547070	G	C	TMEM184A	c.1124C>G	p.Thr375Arg	missense_variant	MODERATE	51	0	0.024	73	17	0.258	4.11333
Aplan-CEM-ATC25-C1_vs_Aplan-CEM-PreTreatment	chr7	1746139	1746139	G	C	ELFN1	c.1543G>C	p.Ala515Pro	missense_variant	MODERATE	86	0	0.012	158	46	0.294	5.76553
Aplan-CEM-ATC25-C1_vs_Aplan-CEM-PreTreatment	chr7	2014565	2014565	C	G	MAD1L1	c.1296G>C	p.Thr432Thr	synonymous_variant	LOW	37	0	0.031	86	27	0.291	4.64969
Aplan-CEM-ATC25-C1_vs_Aplan-CEM-PreTreatment	chr7	2432653	2432653	G	T	CHST12	c.14G>T	p.Arg5Leu	missense_variant	MODERATE	35	0	0.033	78	22	0.264	3.78846
Aplan-CEM-ATC25-C1_vs_Aplan-CEM-PreTreatment	chr7	2432724	2432724	G	A	CHST12	c.85G>A	p.Ala29Thr	missense_variant	MODERATE	42	0	0.027	102	26	0.25	4.18152
Aplan-CEM-ATC25-C1_vs_Aplan-CEM-PreTreatment	chr7	2433864	2433864	G	C	CHST12	c.1225G>C	p.Glu409Gln	missense_variant	MODERATE	44	0	0.023	81	17	0.229	3.24864
Aplan-CEM-ATC25-C1_vs_Aplan-CEM-PreTreatment	chr7	2543858	2543858	C	A	BRAT1	c.535G>T	p.Gly179*	stop_gained	HIGH	72	0	0.015	130	33	0.245	6.38311
Aplan-CEM-ATC25-C1_vs_Aplan-CEM-PreTreatment	chr7	3971502	3971502	T	C	SDK1	c.1751T>C	p.Val584Ala	missense_variant	MODERATE	21	0	0.05	45	14	0.312	2.53716
Aplan-CEM-ATC25-C1_vs_Aplan-CEM-PreTreatment	chr7	4761253	4761253	C	G	FOXK1	c.1886C>G	p.Ala629Gly	missense_variant	MODERATE	40	0	0.029	61	21	0.339	5.19362
Aplan-CEM-ATC25-C1_vs_Aplan-CEM-PreTreatment	chr7	5388643	5388643	G	C	TNRC18	c.1181C>G	p.Ala394Gly	missense_variant	MODERATE	55	0	0.021	83	18	0.225	4.27665
Aplan-CEM-ATC25-C1_vs_Aplan-CEM-PreTreatment	chr7	5500942	5500942	C	T	FBXL18	c.1327G>A	p.Ala443Thr	missense_variant	MODERATE	65	0	0.016	95	24	0.27	5.86184
Aplan-CEM-ATC25-C1_vs_Aplan-CEM-PreTreatment	chr7	5500960	5500960	C	G	FBXL18	c.1309G>C	p.Ala437Pro	missense_variant	MODERATE	66	0	0.016	94	24	0.268	5.87964
Aplan-CEM-ATC25-C1_vs_Aplan-CEM-PreTreatment	chr7	5501748	5501748	C	G	FBXL18	c.521G>C	p.Arg174Pro	missense_variant	MODERATE	75	0	0.015	104	23	0.215	5.85583
Aplan-CEM-ATC25-C1_vs_Aplan-CEM-PreTreatment	chr7	6035635	6035635	G	C	ANKRD61	c.506G>C	p.Arg169Pro	missense_variant	MODERATE	96	0	0.011	128	36	0.298	6.15558
Aplan-CEM-ATC25-C1_vs_Aplan-CEM-PreTreatment	chr7	6591746	6591746	T	C	C7orf26	c.293T>C	p.Leu98Pro	missense_variant	MODERATE	37	0	0.029	57	11	0.217	2.5269
Aplan-CEM-ATC25-C1_vs_Aplan-CEM-PreTreatment	chr7	6621243	6621243	G	C	ZNF853	c.252G>C	p.Pro84Pro	synonymous_variant	LOW	55	0	0.019	107	35	0.327	6.44453
Aplan-CEM-ATC25-C1_vs_Aplan-CEM-PreTreatment	chr7	6622272	6622272	G	C	ZNF853	c.1281G>C	p.Pro427Pro	synonymous_variant	LOW	84	0	0.012	103	32	0.311	6.0396
Aplan-CEM-ATC25-C1_vs_Aplan-CEM-PreTreatment	chr7	6642513	6642513	A	G	ZNF316	c.104A>G	p.Glu35Gly	missense_variant	MODERATE	34	0	0.033	49	9	0.227	2.04017
Aplan-CEM-ATC25-C1_vs_Aplan-CEM-PreTreatment	chr7	6652550	6652550	C	G	ZNF316	c.954C>G	p.Pro318Pro	synonymous_variant	LOW	66	1	0.03	124	31	0.239	5.07687
Aplan-CEM-ATC25-C1_vs_Aplan-CEM-PreTreatment	chr7	8070969	8070969	C	G	GLCCI1	c.1015C>G	p.Arg339Gly	missense_variant	MODERATE	44	0	0.025	52	15	0.326	4.44352
Aplan-CEM-ATC25-C1_vs_Aplan-CEM-PreTreatment	chr7	14718689	14718690	GA	G	DGKB	c.323-5delT		splice_region_variant&intron_variant	LOW	20	0	0.049	40	22	0.513	5.02787
Aplan-CEM-ATC25-C1_vs_Aplan-CEM-PreTreatment	chr7	16674538	16674538	G	A	BZW2	c.185G>A	p.Arg62His	missense_variant	MODERATE	46	0	0.027	57	30	0.522	6.24345
Aplan-CEM-ATC25-C1_vs_Aplan-CEM-PreTreatment	chr7	20379144	20379144	A	G	ITGB8	c.482A>G	p.Asn161Ser	missense_variant	MODERATE	22	0	0.05	31	16	0.5	4.51394
Aplan-CEM-ATC25-C1_vs_Aplan-CEM-PreTreatment	chr7	20784793	20784793	G	A	SP8	c.1024C>T	p.Arg342Cys	missense_variant	MODERATE	71	0	0.015	137	63	0.446	5.85034
Aplan-CEM-ATC25-C1_vs_Aplan-CEM-PreTreatment	chr7	20784887	20784887	C	G	SP8	c.930G>C	p.Pro310Pro	synonymous_variant	LOW	54	0	0.018	111	28	0.261	5.06147
Aplan-CEM-ATC25-C1_vs_Aplan-CEM-PreTreatment	chr7	21606530	21606530	T	C	DNAH11	c.3753T>C	p.Cys1251Cys	synonymous_variant	LOW	38	0	0.03	51	24	0.488	6.57511
Aplan-CEM-ATC25-C1_vs_Aplan-CEM-PreTreatment	chr7	21717887	21717887	A	G	DNAH11	c.7117A>G	p.Lys2373Glu	missense_variant	MODERATE	50	0	0.022	66	31	0.45	5.90059
Aplan-CEM-ATC25-C1_vs_Aplan-CEM-PreTreatment	chr7	21735822	21735822	C	G	DNAH11	c.7644C>G	p.Tyr2548*	stop_gained	HIGH	38	0	0.028	56	12	0.236	2.88072
Aplan-CEM-ATC25-C1_vs_Aplan-CEM-PreTreatment	chr7	23516400	23516400	G	C	TRA2A	c.299C>G	p.Ser100Cys	missense_variant	MODERATE	43	0	0.027	60	11	0.213	2.6338
Aplan-CEM-ATC25-C1_vs_Aplan-CEM-PreTreatment	chr7	26152710	26152710	C	G	NFE2L3	c.212C>G	p.Ala71Gly	missense_variant	MODERATE	51	0	0.022	74	18	0.237	4.4105
Aplan-CEM-ATC25-C1_vs_Aplan-CEM-PreTreatment	chr7	26197873	26197875	GGA	G	HNRNPA2B1	c.7-9_7-8delTC		splice_region_variant&intron_variant	LOW	21	0	0.058	21	11	0.495	3.78305
Aplan-CEM-ATC25-C1_vs_Aplan-CEM-PreTreatment	chr7	27094675	27094675	C	G	HOXA1	c.773G>C	p.Arg258Pro	missense_variant	MODERATE	35	1	0.038	56	17	0.307	3.01242
Aplan-CEM-ATC25-C1_vs_Aplan-CEM-PreTreatment	chr7	27155029	27155029	G	A	HOXA7	c.573C>T	p.Asp191Asp	synonymous_variant	LOW	68	0	0.016	87	17	0.205	4.49192
Aplan-CEM-ATC25-C1_vs_Aplan-CEM-PreTreatment	chr7	27165094	27165094	C	G	HOXA9	c.364G>C	p.Ala122Pro	missense_variant	MODERATE	61	0	0.017	71	16	0.246	4.66528
Aplan-CEM-ATC25-C1_vs_Aplan-CEM-PreTreatment	chr7	27185025	27185025	C	G	HOXA11	c.120G>C	p.Ser40Ser	synonymous_variant	LOW	46	0	0.023	50	13	0.26	3.94642
Aplan-CEM-ATC25-C1_vs_Aplan-CEM-PreTreatment	chr7	27185081	27185081	C	G	HOXA11	c.64G>C	p.Val22Leu	missense_variant	MODERATE	50	0	0.022	60	16	0.264	4.38215
Aplan-CEM-ATC25-C1_vs_Aplan-CEM-PreTreatment	chr7	28956013	28956013	G	C	TRIL	c.2034C>G	p.Cys678Trp	missense_variant	MODERATE	90	0	0.013	120	34	0.296	6.17254
Aplan-CEM-ATC25-C1_vs_Aplan-CEM-PreTreatment	chr7	29742136	29742137	CT	C	DPY19L2P3	n.1879-4delT		splice_region_variant&intron_variant	LOW	72	0	0.015	130	41	0.303	6.09056
Aplan-CEM-ATC25-C1_vs_Aplan-CEM-PreTreatment	chr7	30632369	30632369	A	G	GARS	c.2026A>G	p.Thr676Ala	missense_variant	MODERATE	50	0	0.026	76	25	0.339	5.97641
Aplan-CEM-ATC25-C1_vs_Aplan-CEM-PreTreatment	chr7	34973608	34973609	GA	G	DPY19L1	c.823-4delT		splice_region_variant&intron_variant	LOW	19	0	0.05	35	15	0.448	3.38162
Aplan-CEM-ATC25-C1_vs_Aplan-CEM-PreTreatment	chr7	43507161	43507161	C	G	HECW1	c.3656C>G	p.Ala1219Gly	missense_variant	MODERATE	44	0	0.026	59	18	0.306	4.90137
Aplan-CEM-ATC25-C1_vs_Aplan-CEM-PreTreatment	chr7	43508094	43508094	C	G	HECW1	c.3829C>G	p.Arg1277Gly	missense_variant	MODERATE	28	0	0.04	41	12	0.286	3.00027
Aplan-CEM-ATC25-C1_vs_Aplan-CEM-PreTreatment	chr7	43508108	43508108	C	T	HECW1	c.3843C>T	p.Tyr1281Tyr	synonymous_variant	LOW	27	0	0.042	38	19	0.5	5.47308
Aplan-CEM-ATC25-C1_vs_Aplan-CEM-PreTreatment	chr7	43509086	43509086	C	T	HECW1	c.3984C>T	p.Ser1328Ser	synonymous_variant	LOW	29	0	0.034	59	14	0.259	2.43484
Aplan-CEM-ATC25-C1_vs_Aplan-CEM-PreTreatment	chr7	43550546	43550546	C	G	HECW1	c.4350C>G	p.Arg1450Arg	synonymous_variant	LOW	34	0	0.032	68	16	0.263	2.98443
Aplan-CEM-ATC25-C1_vs_Aplan-CEM-PreTreatment	chr7	43550577	43550577	C	T	HECW1	c.4381C>T	p.Arg1461Cys	missense_variant	MODERATE	37	0	0.029	66	17	0.264	3.61071
Aplan-CEM-ATC25-C1_vs_Aplan-CEM-PreTreatment	chr7	44065149	44065149	G	C	PGAM2	c.381C>G	p.Asp127Glu	missense_variant	MODERATE	64	0	0.016	75	20	0.268	5.68133
Aplan-CEM-ATC25-C1_vs_Aplan-CEM-PreTreatment	chr7	44065229	44065229	C	T	PGAM2	c.301G>A	p.Ala101Thr	missense_variant	MODERATE	59	0	0.017	84	19	0.238	4.68685
Aplan-CEM-ATC25-C1_vs_Aplan-CEM-PreTreatment	chr7	44107696	44107696	G	A	AEBP1	c.735G>A	p.Glu245Glu	synonymous_variant	LOW	74	0	0.014	90	35	0.441	6.2206
Aplan-CEM-ATC25-C1_vs_Aplan-CEM-PreTreatment	chr7	44149764	44149764	G	C	GCK	c.678C>G	p.Ile226Met	missense_variant	MODERATE	40	0	0.026	52	12	0.256	3.03833
Aplan-CEM-ATC25-C1_vs_Aplan-CEM-PreTreatment	chr7	45685966	45685966	G	C	ADCY1	c.2078G>C	p.Gly693Ala	missense_variant	MODERATE	50	0	0.022	93	29	0.326	5.94151
Aplan-CEM-ATC25-C1_vs_Aplan-CEM-PreTreatment	chr7	45686140	45686141	CA	C	ADCY1	c.2257delA	p.Met753fs	frameshift_variant	HIGH	52	0	0.022	124	61	0.49	6.24666
Aplan-CEM-ATC25-C1_vs_Aplan-CEM-PreTreatment	chr7	47929497	47929497	C	T	PKD1L1	c.767G>A	p.Arg256His	missense_variant	MODERATE	31	0	0.034	53	15	0.286	3.17693
Aplan-CEM-ATC25-C1_vs_Aplan-CEM-PreTreatment	chr7	48352312	48352312	T	A	ABCA13	c.10513T>A	p.Ser3505Thr	missense_variant	MODERATE	69	0	0.016	123	26	0.217	5.4137
Aplan-CEM-ATC25-C1_vs_Aplan-CEM-PreTreatment	chr7	48427856	48427856	C	G	ABCA13	c.12550C>G	p.His4184Asp	missense_variant	MODERATE	16	0	0.067	33	11	0.296	2.03296
Aplan-CEM-ATC25-C1_vs_Aplan-CEM-PreTreatment	chr7	51027824	51027824	G	C	COBL	c.3443C>G	p.Pro1148Arg	missense_variant	MODERATE	62	0	0.016	80	19	0.253	5.14337
Aplan-CEM-ATC25-C1_vs_Aplan-CEM-PreTreatment	chr7	51219869	51219869	G	C	COBL	c.117C>G	p.Pro39Pro	synonymous_variant	LOW	38	0	0.026	86	19	0.232	3.13561
Aplan-CEM-ATC25-C1_vs_Aplan-CEM-PreTreatment	chr7	53036048	53036048	G	A	POM121L12	c.377G>A	p.Arg126His	missense_variant	MODERATE	75	0	0.014	119	30	0.255	6.13138
Aplan-CEM-ATC25-C1_vs_Aplan-CEM-PreTreatment	chr7	72942564	72942564	C	G	POM121	c.2571C>G	p.Ala857Ala	synonymous_variant	LOW	36	0	0.026	64	13	0.213	2.4536
Aplan-CEM-ATC25-C1_vs_Aplan-CEM-PreTreatment	chr7	73434236	73434236	G	C	FZD9	c.229G>C	p.Ala77Pro	missense_variant	MODERATE	38	0	0.026	49	15	0.318	4.10543
Aplan-CEM-ATC25-C1_vs_Aplan-CEM-PreTreatment	chr7	73435674	73435674	G	C	FZD9	c.1667G>C	p.Arg556Pro	missense_variant	MODERATE	36	0	0.029	52	15	0.294	3.61227
Aplan-CEM-ATC25-C1_vs_Aplan-CEM-PreTreatment	chr7	73449571	73449571	G	C	BAZ1B	c.3699C>G	p.Pro1233Pro	synonymous_variant	LOW	61	0	0.02	90	17	0.222	3.99338
Aplan-CEM-ATC25-C1_vs_Aplan-CEM-PreTreatment	chr7	73574457	73574457	G	A	TBL2	c.187C>T	p.Gln63*	stop_gained	HIGH	63	0	0.019	81	17	0.206	4.51252
Aplan-CEM-ATC25-C1_vs_Aplan-CEM-PreTreatment	chr7	73709077	73709077	G	C	STX1A	c.76C>G	p.Arg26Gly	missense_variant	MODERATE	40	0	0.027	62	13	0.231	2.85573
Aplan-CEM-ATC25-C1_vs_Aplan-CEM-PreTreatment	chr7	73831294	73831294	C	A	CLDN4	c.93C>A	p.Arg31Arg	synonymous_variant	LOW	67	0	0.016	116	24	0.22	4.88061
Aplan-CEM-ATC25-C1_vs_Aplan-CEM-PreTreatment	chr7	74060031	74060031	C	G	CTB-51J22.1	n.77G>C	p.G384G	splice_region_variant&non_coding_transcript_exon_variant	LOW	63	0	0.017	111	23	0.208	4.5907
Aplan-CEM-ATC25-C1_vs_Aplan-CEM-PreTreatment	chr7	74216064	74216064	G	C	LAT2	c.89G>C	p.Arg30Pro	missense_variant	MODERATE	34	0	0.036	40	8	0.25	2.20015
Aplan-CEM-ATC25-C1_vs_Aplan-CEM-PreTreatment	chr7	74219961	74219961	G	C	LAT2	c.180G>C	p.Leu60Phe	missense_variant&splice_region_variant	MODERATE	39	0	0.026	57	11	0.226	2.59823
Aplan-CEM-ATC25-C1_vs_Aplan-CEM-PreTreatment	chr7	74512857	74512857	G	C	GTF2IRD1	c.151G>C	p.Glu51Gln	missense_variant	MODERATE	34	0	0.036	45	13	0.289	3.42756
Aplan-CEM-ATC25-C1_vs_Aplan-CEM-PreTreatment	chr7	74519586	74519586	G	A	GTF2IRD1	c.879G>A	p.Ala293Ala	synonymous_variant	LOW	44	0	0.026	65	16	0.258	3.8202
Aplan-CEM-ATC25-C1_vs_Aplan-CEM-PreTreatment	chr7	74836318	74836318	T	C	GTF2IRD2	c.61A>G	p.Met21Val	missense_variant	MODERATE	56	0	0.021	85	46	0.554	6.01021
Aplan-CEM-ATC25-C1_vs_Aplan-CEM-PreTreatment	chr7	75070708	75070708	G	C	RCC1L	c.386C>G	p.Thr129Arg	missense_variant	MODERATE	84	0	0.015	78	24	0.323	6.0894
Aplan-CEM-ATC25-C1_vs_Aplan-CEM-PreTreatment	chr7	76066343	76066343	C	T	MDH2	c.950C>T	p.Ser317Leu	missense_variant	MODERATE	70	0	0.017	95	47	0.48	5.83815
Aplan-CEM-ATC25-C1_vs_Aplan-CEM-PreTreatment	chr7	76282984	76282984	G	C	SRRM3	c.1616G>C	p.Arg539Pro	missense_variant	MODERATE	42	0	0.026	57	13	0.245	3.29948
Aplan-CEM-ATC25-C1_vs_Aplan-CEM-PreTreatment	chr7	76303853	76303853	C	T	HSPB1	c.416C>T	p.Thr139Met	missense_variant	MODERATE	36	0	0.028	49	13	0.276	3.35499
Aplan-CEM-ATC25-C1_vs_Aplan-CEM-PreTreatment	chr7	76400552	76400552	C	G	SSC4D	c.209G>C	p.Arg70Pro	missense_variant	MODERATE	73	1	0.031	97	26	0.282	5.60673
Aplan-CEM-ATC25-C1_vs_Aplan-CEM-PreTreatment	chr7	76425113	76425113	C	G	ZP3	c.149C>G	p.Thr50Ser	missense_variant	MODERATE	63	0	0.018	92	24	0.299	5.88839
Aplan-CEM-ATC25-C1_vs_Aplan-CEM-PreTreatment	chr7	76433496	76433496	C	A	ZP3	c.562C>A	p.Pro188Thr	missense_variant	MODERATE	57	0	0.022	71	23	0.322	6.22576
Aplan-CEM-ATC25-C1_vs_Aplan-CEM-PreTreatment	chr7	76434047	76434047	C	G	ZP3	c.723C>G	p.Val241Val	synonymous_variant	LOW	13	0	0.067	12	7	0.571	2.78315
Aplan-CEM-ATC25-C1_vs_Aplan-CEM-PreTreatment	chr7	76482998	76482998	C	G	DTX2	c.759C>G	p.Ser253Ser	synonymous_variant	LOW	80	0	0.014	93	21	0.225	5.89087
Aplan-CEM-ATC25-C1_vs_Aplan-CEM-PreTreatment	chr7	78125781	78125781	G	C	MAGI2	c.3480C>G	p.Ser1160Arg	missense_variant	MODERATE	23	0	0.045	54	17	0.34	2.75249
Aplan-CEM-ATC25-C1_vs_Aplan-CEM-PreTreatment	chr7	78256248	78256248	G	C	MAGI2	c.1742C>G	p.Thr581Arg	missense_variant	MODERATE	51	0	0.023	93	31	0.358	6.05117
Aplan-CEM-ATC25-C1_vs_Aplan-CEM-PreTreatment	chr7	78256588	78256589	GA	G	MAGI2	c.1409-8delT		splice_region_variant&intron_variant	LOW	15	0	0.058	51	22	0.422	2.90404
Aplan-CEM-ATC25-C1_vs_Aplan-CEM-PreTreatment	chr7	83392549	83392549	T	G	SEMA3E	c.1667+6A>C		splice_region_variant&intron_variant	LOW	36	0	0.03	49	23	0.489	6.23899
Aplan-CEM-ATC25-C1_vs_Aplan-CEM-PreTreatment	chr7	86786635	86786635	G	C	GRM3	c.843G>C	p.Ser281Ser	synonymous_variant	LOW	24	0	0.046	63	14	0.241	2.05321
Aplan-CEM-ATC25-C1_vs_Aplan-CEM-PreTreatment	chr7	91993051	91993051	A	C	AKAP9	c.605A>C	p.Gln202Pro	missense_variant	MODERATE	38	0	0.028	75	15	0.212	2.66204
Aplan-CEM-ATC25-C1_vs_Aplan-CEM-PreTreatment	chr7	92001741	92001741	T	C	AKAP9	c.1857T>C	p.Asn619Asn	synonymous_variant	LOW	55	0	0.018	81	20	0.263	4.93194
Aplan-CEM-ATC25-C1_vs_Aplan-CEM-PreTreatment	chr7	94600648	94600648	G	A	SGCE	c.1143C>T	p.Gly381Gly	splice_region_variant&synonymous_variant	LOW	27	0	0.038	43	25	0.579	6.63365
Aplan-CEM-ATC25-C1_vs_Aplan-CEM-PreTreatment	chr7	94663766	94663766	A	G	PEG10	c.438A>G	p.Pro146Pro	synonymous_variant	LOW	35	0	0.026	57	13	0.24	2.84872
Aplan-CEM-ATC25-C1_vs_Aplan-CEM-PreTreatment	chr7	98949729	98949729	C	T	TRRAP	c.5002C>T	p.Arg1668*	stop_gained	HIGH	60	0	0.018	113	57	0.5	5.88134
Aplan-CEM-ATC25-C1_vs_Aplan-CEM-PreTreatment	chr7	98955183	98955183	C	G	TRRAP	c.5795C>G	p.Pro1932Arg	missense_variant	MODERATE	65	0	0.017	90	21	0.27	5.32627
Aplan-CEM-ATC25-C1_vs_Aplan-CEM-PreTreatment	chr7	98956437	98956437	A	G	TRRAP	c.6114A>G	p.Gly2038Gly	synonymous_variant	LOW	73	0	0.016	104	50	0.5	6.34881
Aplan-CEM-ATC25-C1_vs_Aplan-CEM-PreTreatment	chr7	99011060	99011060	C	G	TRRAP	c.10905C>G	p.Arg3635Arg	synonymous_variant	LOW	51	0	0.022	45	12	0.255	4.33686
Aplan-CEM-ATC25-C1_vs_Aplan-CEM-PreTreatment	chr7	99423838	99423838	C	G	PTCD1	c.1857G>C	p.Pro619Pro	synonymous_variant	LOW	132	0	0.008843	171	37	0.214	5.81933
Aplan-CEM-ATC25-C1_vs_Aplan-CEM-PreTreatment	chr7	100057883	100057883	G	C	ZSCAN21	c.585G>C	p.Lys195Asn	missense_variant	MODERATE	47	1	0.026	74	16	0.227	2.62397
Aplan-CEM-ATC25-C1_vs_Aplan-CEM-PreTreatment	chr7	100091318	100091318	G	C	COPS6	c.730G>C	p.Ala244Pro	missense_variant	MODERATE	53	0	0.021	62	20	0.302	5.8409
Aplan-CEM-ATC25-C1_vs_Aplan-CEM-PreTreatment	chr7	100098586	100098586	G	C	MCM7	c.712C>G	p.Gln238Glu	missense_variant	MODERATE	73	0	0.016	100	28	0.279	5.88664
Aplan-CEM-ATC25-C1_vs_Aplan-CEM-PreTreatment	chr7	100099317	100099317	G	T	MCM7	c.363C>A	p.Ser121Arg	missense_variant	MODERATE	50	0	0.023	81	21	0.279	4.83461
Aplan-CEM-ATC25-C1_vs_Aplan-CEM-PreTreatment	chr7	100127595	100127595	G	C	MBLAC1	c.200G>C	p.Gly67Ala	missense_variant	MODERATE	51	0	0.022	76	25	0.323	5.93107
Aplan-CEM-ATC25-C1_vs_Aplan-CEM-PreTreatment	chr7	100160864	100160864	G	C	GAL3ST4	c.525C>G	p.Thr175Thr	synonymous_variant	LOW	51	0	0.022	60	24	0.386	5.94873
Aplan-CEM-ATC25-C1_vs_Aplan-CEM-PreTreatment	chr7	100173892	100173892	C	G	GPC2	c.835G>C	p.Val279Leu	missense_variant	MODERATE	34	0	0.033	49	11	0.25	2.6535
Aplan-CEM-ATC25-C1_vs_Aplan-CEM-PreTreatment	chr7	100197832	100197832	C	G	STAG3	c.1120C>G	p.Arg374Gly	missense_variant	MODERATE	35	0	0.03	46	9	0.219	2.06331
Aplan-CEM-ATC25-C1_vs_Aplan-CEM-PreTreatment	chr7	100223938	100223938	C	G	GATS	c.355G>C	p.Ala119Pro	missense_variant	MODERATE	101	0	0.012	163	38	0.219	5.96391
Aplan-CEM-ATC25-C1_vs_Aplan-CEM-PreTreatment	chr7	100223962	100223962	C	G	GATS	c.331G>C	p.Ala111Pro	missense_variant	MODERATE	98	0	0.012	150	31	0.215	6.09827
Aplan-CEM-ATC25-C1_vs_Aplan-CEM-PreTreatment	chr7	100683392	100683392	C	T	GIGYF1	c.2105G>A	p.Arg702His	missense_variant	MODERATE	49	0	0.022	80	22	0.27	4.88517
Aplan-CEM-ATC25-C1_vs_Aplan-CEM-PreTreatment	chr7	100861867	100861868	AG	A	SLC12A9	c.1674delG	p.Leu559fs	frameshift_variant	HIGH	52	0	0.02	104	26	0.277	4.84562
Aplan-CEM-ATC25-C1_vs_Aplan-CEM-PreTreatment	chr7	101013975	101013975	G	C	MUC12	c.16130G>C	p.Ser5377Thr	missense_variant	MODERATE	70	0	0.017	96	25	0.253	6.17085
Aplan-CEM-ATC25-C1_vs_Aplan-CEM-PreTreatment	chr7	101051633	101051633	A	G	MUC17	c.12895A>G	p.Thr4299Ala	missense_variant	MODERATE	33	0	0.033	47	11	0.255	2.67861
Aplan-CEM-ATC25-C1_vs_Aplan-CEM-PreTreatment	chr7	101128551	101128551	G	C	SERPINE1	c.158G>C	p.R53P	structural_interaction_variant	HIGH	74	0	0.015	97	26	0.289	6.38332
Aplan-CEM-ATC25-C1_vs_Aplan-CEM-PreTreatment	chr7	102196803	102196803	C	G	CUX1	c.1425C>G	p.Ser475Ser	synonymous_variant	LOW	81	0	0.013	136	32	0.222	6.30197
Aplan-CEM-ATC25-C1_vs_Aplan-CEM-PreTreatment	chr7	102202045	102202045	C	G	CUX1	c.2781C>G	p.Ile927Met	missense_variant	MODERATE	62	0	0.018	118	29	0.247	5.70177
Aplan-CEM-ATC25-C1_vs_Aplan-CEM-PreTreatment	chr7	102239470	102239470	C	T	CUX1	c.3806C>T	p.Ala1269Val	missense_variant	MODERATE	61	0	0.019	75	16	0.235	4.26988
Aplan-CEM-ATC25-C1_vs_Aplan-CEM-PreTreatment	chr7	103917177	103917177	A	G	RELN	c.235T>C	p.Ser79Pro	missense_variant	MODERATE	28	0	0.044	32	11	0.346	3.35738
Aplan-CEM-ATC25-C1_vs_Aplan-CEM-PreTreatment	chr7	105117974	105117974	A	G	SRPK2	c.1964T>C	p.Val655Ala	missense_variant	MODERATE	43	0	0.03	51	13	0.273	3.7689
Aplan-CEM-ATC25-C1_vs_Aplan-CEM-PreTreatment	chr7	106015976	106015976	C	A	CDHR3	c.1377C>A	p.Leu459Leu	synonymous_variant	LOW	23	0	0.048	34	10	0.367	2.43104
Aplan-CEM-ATC25-C1_vs_Aplan-CEM-PreTreatment	chr7	106097706	106097706	C	G	SYPL1	c.440G>C	p.Arg147Pro	missense_variant	MODERATE	33	0	0.033	35	9	0.265	2.65455
Aplan-CEM-ATC25-C1_vs_Aplan-CEM-PreTreatment	chr7	108103053	108103053	C	G	LAMB4	c.1171G>C	p.Ala391Pro	missense_variant	MODERATE	42	0	0.027	49	12	0.244	3.48481
Aplan-CEM-ATC25-C1_vs_Aplan-CEM-PreTreatment	chr7	111728436	111728436	G	A	DOCK4	c.5835C>T	p.Pro1945Pro	synonymous_variant	LOW	64	0	0.017	81	19	0.26	5.18662
Aplan-CEM-ATC25-C1_vs_Aplan-CEM-PreTreatment	chr7	113879663	113879664	TA	T	PPP1R3A	c.1428delT	p.Asn476fs	frameshift_variant	HIGH	33	0	0.03	60	16	0.277	3.34839
Aplan-CEM-ATC25-C1_vs_Aplan-CEM-PreTreatment	chr7	116731731	116731731	A	G	MET	c.1264A>G	p.Thr422Ala	missense_variant	MODERATE	32	0	0.036	56	11	0.211	2.21333
Aplan-CEM-ATC25-C1_vs_Aplan-CEM-PreTreatment	chr7	121329367	121329367	C	G	WNT16	c.75C>G	p.Tyr25*	stop_gained	HIGH	55	0	0.019	63	22	0.321	6.59391
Aplan-CEM-ATC25-C1_vs_Aplan-CEM-PreTreatment	chr7	122303945	122303945	G	C	FEZF1	c.493C>G	p.Arg165Gly	missense_variant	MODERATE	43	0	0.024	81	26	0.313	5.42976
Aplan-CEM-ATC25-C1_vs_Aplan-CEM-PreTreatment	chr7	122702347	122702347	G	C	RNF148	c.404C>G	p.Thr135Arg	missense_variant	MODERATE	37	0	0.028	60	13	0.241	2.83629
Aplan-CEM-ATC25-C1_vs_Aplan-CEM-PreTreatment	chr7	122702361	122702361	G	A	RNF148	c.390C>T	p.Tyr130Tyr	synonymous_variant	LOW	38	0	0.027	63	13	0.232	2.79798
Aplan-CEM-ATC25-C1_vs_Aplan-CEM-PreTreatment	chr7	124032655	124032655	C	G	TMEM229A	c.349G>C	p.Ala117Pro	missense_variant	MODERATE	68	0	0.017	102	24	0.236	5.7645
Aplan-CEM-ATC25-C1_vs_Aplan-CEM-PreTreatment	chr7	127600311	127600311	C	T	FSCN3	c.1409C>T	p.Pro470Leu	missense_variant	MODERATE	9	0	0.1	11	8	0.668	2.85972
Aplan-CEM-ATC25-C1_vs_Aplan-CEM-PreTreatment	chr7	128850381	128850381	C	A	FLNC	c.5299-3C>A		splice_region_variant&intron_variant	LOW	27	0	0.037	17	15	0.8	7.09448
Aplan-CEM-ATC25-C1_vs_Aplan-CEM-PreTreatment	chr7	128892915	128892915	A	G	KCP	c.1374T>C	p.Ala458Ala	synonymous_variant	LOW	50	0	0.021	52	10	0.215	2.91188
Aplan-CEM-ATC25-C1_vs_Aplan-CEM-PreTreatment	chr7	128894275	128894275	G	A	KCP	c.850C>T	p.Arg284Cys	missense_variant	MODERATE	31	0	0.033	45	11	0.294	2.67047
Aplan-CEM-ATC25-C1_vs_Aplan-CEM-PreTreatment	chr7	129397261	129397261	C	G	AHCYL2	c.760C>G	p.R254G	structural_interaction_variant	HIGH	37	0	0.03	72	16	0.232	2.97972
Aplan-CEM-ATC25-C1_vs_Aplan-CEM-PreTreatment	chr7	130497967	130497967	G	C	MEST	c.293G>C	p.Arg98Pro	missense_variant	MODERATE	41	0	0.026	52	12	0.261	3.04155
Aplan-CEM-ATC25-C1_vs_Aplan-CEM-PreTreatment	chr7	134661637	134661637	C	T	BPGM	c.130C>T	p.Gln44*	stop_gained	HIGH	55	0	0.02	85	29	0.356	5.9589
Aplan-CEM-ATC25-C1_vs_Aplan-CEM-PreTreatment	chr7	135240607	135240607	G	C	STRA8	c.149G>C	p.Arg50Pro	missense_variant	MODERATE	49	0	0.024	72	16	0.21	3.7784
Aplan-CEM-ATC25-C1_vs_Aplan-CEM-PreTreatment	chr7	135674093	135674093	A	G	C7orf73	c.72A>G	p.Ile24Met	missense_variant&splice_region_variant	MODERATE	24	0	0.045	20	6	0.368	2.26036
Aplan-CEM-ATC25-C1_vs_Aplan-CEM-PreTreatment	chr7	137016249	137016249	A	G	CHRM2	c.1384A>G	p.Ile462Val	missense_variant	MODERATE	33	0	0.032	51	13	0.304	2.92622
Aplan-CEM-ATC25-C1_vs_Aplan-CEM-PreTreatment	chr7	138584914	138584914	G	A	TRIM24	c.3116G>A	p.Arg1039His	missense_variant	MODERATE	49	0	0.022	42	11	0.316	4.04359
Aplan-CEM-ATC25-C1_vs_Aplan-CEM-PreTreatment	chr7	140425923	140425923	G	C	RAB19	c.427G>C	p.Glu143Gln	missense_variant	MODERATE	44	0	0.026	88	23	0.28	4.36738
Aplan-CEM-ATC25-C1_vs_Aplan-CEM-PreTreatment	chr7	140546911	140546911	C	T	DENND2A	c.2066G>A	p.Gly689Asp	missense_variant	MODERATE	46	0	0.026	69	18	0.279	4.38261
Aplan-CEM-ATC25-C1_vs_Aplan-CEM-PreTreatment	chr7	141972870	141972870	G	C	TAS2R38	c.820C>G	p.Arg274Gly	missense_variant	MODERATE	54	1	0.02	76	25	0.344	5.4545
Aplan-CEM-ATC25-C1_vs_Aplan-CEM-PreTreatment	chr7	143398748	143398748	G	C	EPHA1	c.1189C>G	p.Arg397Gly	missense_variant	MODERATE	64	0	0.017	93	18	0.201	4.30203
Aplan-CEM-ATC25-C1_vs_Aplan-CEM-PreTreatment	chr7	147395630	147395630	A	G	CNTNAP2	c.1520A>G	p.Asn507Ser	missense_variant	MODERATE	18	0	0.056	46	21	0.425	3.64308
Aplan-CEM-ATC25-C1_vs_Aplan-CEM-PreTreatment	chr7	147395635	147395635	A	G	CNTNAP2	c.1525A>G	p.Ser509Gly	missense_variant	MODERATE	21	0	0.048	46	21	0.439	3.97617
Aplan-CEM-ATC25-C1_vs_Aplan-CEM-PreTreatment	chr7	148172448	148172449	AC	A	CNTNAP2	c.2981delC	p.Thr994fs	frameshift_variant	HIGH	29	0	0.036	51	20	0.386	4.56788
Aplan-CEM-ATC25-C1_vs_Aplan-CEM-PreTreatment	chr7	149474774	149474774	G	A	ZNF746	c.1548C>T	p.Cys516Cys	synonymous_variant	LOW	95	0	0.011	111	55	0.465	5.88307
Aplan-CEM-ATC25-C1_vs_Aplan-CEM-PreTreatment	chr7	149764803	149764803	C	T	ZNF467	c.1699G>A	p.Glu567Lys	missense_variant	MODERATE	59	0	0.019	93	50	0.512	5.9528
Aplan-CEM-ATC25-C1_vs_Aplan-CEM-PreTreatment	chr7	149790474	149790474	G	C	SSPO	c.4879G>C	p.Val1627Leu	missense_variant	MODERATE	39	0	0.027	69	17	0.267	3.60648
Aplan-CEM-ATC25-C1_vs_Aplan-CEM-PreTreatment	chr7	149800305	149800305	G	T	SSPO	c.7154G>T	p.Gly2385Val	missense_variant	MODERATE	62	0	0.018	82	27	0.342	5.76672
Aplan-CEM-ATC25-C1_vs_Aplan-CEM-PreTreatment	chr7	150372320	150372320	C	G	REPIN1	c.1250C>G	p.Pro417Arg	missense_variant	MODERATE	96	0	0.012	126	28	0.234	5.72589
Aplan-CEM-ATC25-C1_vs_Aplan-CEM-PreTreatment	chr7	150372629	150372629	A	G	REPIN1	c.1559A>G	p.Asp520Gly	missense_variant	MODERATE	69	0	0.016	125	39	0.305	6.45234
Aplan-CEM-ATC25-C1_vs_Aplan-CEM-PreTreatment	chr7	150397627	150397627	C	G	ZNF775	c.1146C>G	p.Arg382Arg	synonymous_variant	LOW	65	0	0.016	107	31	0.283	6.04096
Aplan-CEM-ATC25-C1_vs_Aplan-CEM-PreTreatment	chr7	150398067	150398067	C	G	ZNF775	c.1586C>G	p.Ala529Gly	missense_variant	MODERATE	88	1	0.024	148	45	0.307	6.02501
Aplan-CEM-ATC25-C1_vs_Aplan-CEM-PreTreatment	chr7	150520462	150520462	G	C	GIMAP7	c.488G>C	p.Arg163Pro	missense_variant	MODERATE	92	0	0.012	86	21	0.253	6.48097
Aplan-CEM-ATC25-C1_vs_Aplan-CEM-PreTreatment	chr7	150692840	150692840	G	A	GIMAP2	c.554G>A	p.Arg185His	missense_variant	MODERATE	37	0	0.028	66	18	0.288	3.67115
Aplan-CEM-ATC25-C1_vs_Aplan-CEM-PreTreatment	chr7	150720380	150720380	G	T	GIMAP1	c.376G>T	p.Ala126Ser	missense_variant	MODERATE	132	0	0.008716	153	41	0.27	6.00888
Aplan-CEM-ATC25-C1_vs_Aplan-CEM-PreTreatment	chr7	150720741	150720741	G	C	GIMAP1	c.737G>C	p.Arg246Pro	missense_variant	MODERATE	59	0	0.017	73	20	0.283	5.63893
Aplan-CEM-ATC25-C1_vs_Aplan-CEM-PreTreatment	chr7	151143855	151143855	G	C	AGAP3	c.2648G>C	p.Gly883Ala	missense_variant	MODERATE	67	0	0.016	91	20	0.25	5.01676
Aplan-CEM-ATC25-C1_vs_Aplan-CEM-PreTreatment	chr7	151180983	151180983	G	C	ASB10	c.1060C>G	p.Leu354Val	missense_variant	MODERATE	71	0	0.016	86	24	0.262	6.32455
Aplan-CEM-ATC25-C1_vs_Aplan-CEM-PreTreatment	chr7	152146643	152146643	G	C	KMT2C	c.13987C>G	p.Leu4663Val	missense_variant	MODERATE	29	0	0.036	49	12	0.25	2.56752
Aplan-CEM-ATC25-C1_vs_Aplan-CEM-PreTreatment	chr7	152648683	152648684	GT	G	XRCC2	c.801delA	p.Lys267fs	frameshift_variant	HIGH	35	0	0.028	78	24	0.324	4.37289
Aplan-CEM-ATC25-C1_vs_Aplan-CEM-PreTreatment	chr7	156960178	156960178	C	G	NOM1	c.1632+4C>G		splice_region_variant&intron_variant	LOW	34	0	0.03	55	16	0.302	3.49651
Aplan-CEM-ATC25-C1_vs_Aplan-CEM-PreTreatment	chr7	157005708	157005708	C	A	MNX1	c.1018G>T	p.Gly340*	stop_gained	HIGH	83	0	0.014	103	19	0.224	5.11036
Aplan-CEM-ATC25-C1_vs_Aplan-CEM-PreTreatment	chr8	431398	431399	GA	G	FBXO25	c.199delA	p.Arg67fs	frameshift_variant	HIGH	29	0	0.041	38	12	0.346	3.1679
Aplan-CEM-ATC25-C1_vs_Aplan-CEM-PreTreatment	chr8	544721	544721	C	T	TDRP	c.37G>A	p.Glu13Lys	missense_variant	MODERATE	44	0	0.029	31	10	0.321	4.2716
Aplan-CEM-ATC25-C1_vs_Aplan-CEM-PreTreatment	chr8	673341	673341	T	C	ERICH1	c.1011A>G	p.Ala337Ala	synonymous_variant	LOW	82	0	0.014	140	60	0.406	5.79363
Aplan-CEM-ATC25-C1_vs_Aplan-CEM-PreTreatment	chr8	2957765	2957765	T	A	CSMD1	c.9748A>T	p.Ile3250Phe	missense_variant	MODERATE	21	0	0.056	42	15	0.314	2.93544
Aplan-CEM-ATC25-C1_vs_Aplan-CEM-PreTreatment	chr8	8318481	8318481	G	A	SGK223	c.3894C>T	p.Pro1298Pro	synonymous_variant	LOW	44	0	0.023	99	35	0.338	5.99968
Aplan-CEM-ATC25-C1_vs_Aplan-CEM-PreTreatment	chr8	10428261	10428261	C	G	MSRA	c.657C>G	p.Tyr219*	stop_gained	HIGH	32	0	0.033	53	15	0.273	3.17413
Aplan-CEM-ATC25-C1_vs_Aplan-CEM-PreTreatment	chr8	10610939	10610939	C	G	RP1L1	c.3159G>C	p.Glu1053Asp	missense_variant	MODERATE	62	0	0.016	104	23	0.228	5.00082
Aplan-CEM-ATC25-C1_vs_Aplan-CEM-PreTreatment	chr8	11304999	11305000	CA	C	MTMR9	c.584delA	p.Asn195fs	frameshift_variant	HIGH	50	2	0.069	36	18	0.519	6.19956
Aplan-CEM-ATC25-C1_vs_Aplan-CEM-PreTreatment	chr8	13021974	13021974	G	C	KIAA1456	c.1295G>C	p.Arg432Pro	missense_variant	MODERATE	35	0	0.031	53	15	0.26	3.57664
Aplan-CEM-ATC25-C1_vs_Aplan-CEM-PreTreatment	chr8	13100487	13100488	CG	C	DLC1	c.1849delC	p.Arg617fs	frameshift_variant	HIGH	76	1	0.027	129	25	0.214	4.27588
Aplan-CEM-ATC25-C1_vs_Aplan-CEM-PreTreatment	chr8	13100595	13100595	G	T	DLC1	c.1742C>A	p.Thr581Lys	missense_variant	MODERATE	72	0	0.015	127	34	0.292	5.94397
Aplan-CEM-ATC25-C1_vs_Aplan-CEM-PreTreatment	chr8	17972443	17972443	A	G	PCM1	c.3699A>G	p.Glu1233Glu	synonymous_variant	LOW	36	0	0.032	56	29	0.54	6.29135
Aplan-CEM-ATC25-C1_vs_Aplan-CEM-PreTreatment	chr8	23447800	23447800	T	C	ENTPD4	c.292A>G	p.Ser98Gly	missense_variant	MODERATE	41	0	0.028	56	34	0.556	6.0062
Aplan-CEM-ATC25-C1_vs_Aplan-CEM-PreTreatment	chr8	27598601	27598601	G	C	CLU	c.1199C>G	p.Ser400Cys	missense_variant	MODERATE	34	0	0.034	48	10	0.227	2.36698
Aplan-CEM-ATC25-C1_vs_Aplan-CEM-PreTreatment	chr8	29070743	29070743	C	G	KIF13B	c.5242G>C	p.Gly1748Arg	missense_variant	MODERATE	38	1	0.027	38	10	0.264	2.17435
Aplan-CEM-ATC25-C1_vs_Aplan-CEM-PreTreatment	chr8	29132352	29132352	C	A	KIF13B	c.2898G>T	p.Trp966Cys	missense_variant	MODERATE	49	0	0.026	52	30	0.587	6.20164
Aplan-CEM-ATC25-C1_vs_Aplan-CEM-PreTreatment	chr8	31640617	31640617	C	G	NRG1	c.192C>G	p.Pro64Pro	synonymous_variant	LOW	51	0	0.023	91	24	0.259	5.04038
Aplan-CEM-ATC25-C1_vs_Aplan-CEM-PreTreatment	chr8	37833822	37833822	C	G	ADGRA2	c.1431C>G	p.Val477Val	synonymous_variant	LOW	43	0	0.026	56	11	0.22	2.6822
Aplan-CEM-ATC25-C1_vs_Aplan-CEM-PreTreatment	chr8	37841995	37841995	C	G	ADGRA2	c.3657C>G	p.Ser1219Arg	missense_variant	MODERATE	32	0	0.032	64	20	0.316	3.94851
Aplan-CEM-ATC25-C1_vs_Aplan-CEM-PreTreatment	chr8	37842118	37842118	C	G	ADGRA2	c.3780C>G	p.Ala1260Ala	synonymous_variant	LOW	52	0	0.023	39	12	0.333	4.90674
Aplan-CEM-ATC25-C1_vs_Aplan-CEM-PreTreatment	chr8	37844812	37844812	C	G	BRF2	c.938G>C	p.Arg313Pro	missense_variant	MODERATE	63	0	0.017	84	20	0.239	5.06502
Aplan-CEM-ATC25-C1_vs_Aplan-CEM-PreTreatment	chr8	37847186	37847186	C	G	BRF2	c.215-11G>C		sequence_feature	LOW	28	0	0.039	34	10	0.312	2.87237
Aplan-CEM-ATC25-C1_vs_Aplan-CEM-PreTreatment	chr8	37847188	37847188	C	G	BRF2	c.215-13G>C		sequence_feature	LOW	28	0	0.04	34	10	0.312	2.87237
Aplan-CEM-ATC25-C1_vs_Aplan-CEM-PreTreatment	chr8	40674804	40674804	C	G	ZMAT4	c.477G>C	p.Met159Ile	missense_variant	MODERATE	38	0	0.028	88	23	0.25	3.95485
Aplan-CEM-ATC25-C1_vs_Aplan-CEM-PreTreatment	chr8	41688549	41688550	AG	A	ANK1	c.4267delC	p.Leu1423fs	frameshift_variant	HIGH	26	0	0.043	40	19	0.455	4.96799
Aplan-CEM-ATC25-C1_vs_Aplan-CEM-PreTreatment	chr8	43013116	43013116	T	G	HOOK3	c.1905T>G	p.Asn635Lys	missense_variant	MODERATE	31	0	0.038	36	9	0.29	2.57296
Aplan-CEM-ATC25-C1_vs_Aplan-CEM-PreTreatment	chr8	47595846	47595846	T	C	SPIDR	c.1133T>C	p.Val378Ala	missense_variant	MODERATE	34	0	0.034	38	9	0.235	2.59662
Aplan-CEM-ATC25-C1_vs_Aplan-CEM-PreTreatment	chr8	47737334	47737334	C	G	CEBPD	c.787G>C	p.Ala263Pro	missense_variant	MODERATE	45	0	0.023	67	17	0.265	4.10929
Aplan-CEM-ATC25-C1_vs_Aplan-CEM-PreTreatment	chr8	47737970	47737970	C	CGG	CEBPD	c.149_150dupCC	p.Ala51fs	frameshift_variant	HIGH	20	0	0.056	22	11	0.418	3.69029
Aplan-CEM-ATC25-C1_vs_Aplan-CEM-PreTreatment	chr8	47737976	47737976	C	G	CEBPD	c.145G>C	p.Ala49Pro	missense_variant	MODERATE	20	0	0.057	22	11	0.421	3.69029
Aplan-CEM-ATC25-C1_vs_Aplan-CEM-PreTreatment	chr8	47778468	47778468	G	C	PRKDC	c.11844C>G	p.Ser3948Ser	synonymous_variant	LOW	44	0	0.025	60	13	0.231	3.27568
Aplan-CEM-ATC25-C1_vs_Aplan-CEM-PreTreatment	chr8	51447085	51447085	C	T	PXDNL	c.1444G>A	p.Asp482Asn	missense_variant	MODERATE	49	0	0.024	55	14	0.255	4.19899
Aplan-CEM-ATC25-C1_vs_Aplan-CEM-PreTreatment	chr8	52656937	52656938	CT	C	RB1CC1	c.2891delA	p.Lys964fs	frameshift_variant	HIGH	69	0	0.015	58	23	0.377	6.07862
Aplan-CEM-ATC25-C1_vs_Aplan-CEM-PreTreatment	chr8	53229361	53229361	A	G	OPRK1	c.1079T>C	p.Val360Ala	missense_variant	MODERATE	53	0	0.022	62	13	0.232	3.72753
Aplan-CEM-ATC25-C1_vs_Aplan-CEM-PreTreatment	chr8	55824674	55824674	C	G	TGS1	c.2533C>G	p.L845V	structural_interaction_variant	HIGH	33	0	0.034	69	15	0.207	2.66513
Aplan-CEM-ATC25-C1_vs_Aplan-CEM-PreTreatment	chr8	60743061	60743061	A	G	CHD7	c.1629A>G	p.Ser543Ser	synonymous_variant	LOW	56	0	0.02	73	20	0.277	5.14268
Aplan-CEM-ATC25-C1_vs_Aplan-CEM-PreTreatment	chr8	61680961	61680961	T	C	ASPH	c.322+7A>G		splice_region_variant&intron_variant	LOW	23	0	0.048	41	13	0.352	2.62739
Aplan-CEM-ATC25-C1_vs_Aplan-CEM-PreTreatment	chr8	66505491	66505491	G	C	C8orf46	c.243G>C	p.Pro81Pro	synonymous_variant	LOW	39	0	0.026	75	20	0.286	3.87352
Aplan-CEM-ATC25-C1_vs_Aplan-CEM-PreTreatment	chr8	66793800	66793800	G	C	SGK3	c.64G>C	p.Asp22His	missense_variant	MODERATE	46	0	0.024	71	18	0.274	4.0237
Aplan-CEM-ATC25-C1_vs_Aplan-CEM-PreTreatment	chr8	67149901	67149901	T	C	CSPP1	c.2079T>C	p.Ala693Ala	synonymous_variant	LOW	40	0	0.028	50	33	0.617	6.1467
Aplan-CEM-ATC25-C1_vs_Aplan-CEM-PreTreatment	chr8	67238880	67238880	G	A	ARFGEF1	c.2993C>T	p.Ala998Val	missense_variant	MODERATE	25	0	0.042	57	29	0.489	5.73443
Aplan-CEM-ATC25-C1_vs_Aplan-CEM-PreTreatment	chr8	69672917	69672917	C	G	SLCO5A1	c.2499G>C	p.Ala833Ala	synonymous_variant	LOW	63	0	0.016	95	18	0.207	4.22365
Aplan-CEM-ATC25-C1_vs_Aplan-CEM-PreTreatment	chr8	72057019	72057020	TA	T	TRPA1	c.1094-3delT		splice_region_variant&intron_variant	LOW	14	0	0.068	32	14	0.373	2.41979
Aplan-CEM-ATC25-C1_vs_Aplan-CEM-PreTreatment	chr8	73013956	73013957	GT	G	TERF1	c.386delT	p.Leu129fs	frameshift_variant	HIGH	25	0	0.045	34	15	0.445	4.29756
Aplan-CEM-ATC25-C1_vs_Aplan-CEM-PreTreatment	chr8	76705375	76705375	G	A	ZFHX4	c.1287G>A	p.Ser429Ser	synonymous_variant	LOW	48	0	0.022	91	22	0.259	4.36903
Aplan-CEM-ATC25-C1_vs_Aplan-CEM-PreTreatment	chr8	80687402	80687402	T	C	ZNF704	c.382A>G	p.Ser128Gly	missense_variant	MODERATE	41	0	0.025	58	12	0.219	2.93124
Aplan-CEM-ATC25-C1_vs_Aplan-CEM-PreTreatment	chr8	91991828	91991828	A	G	RUNX1T1	c.979T>C	p.Cys327Arg	missense_variant	MODERATE	49	0	0.025	64	18	0.291	4.92288
Aplan-CEM-ATC25-C1_vs_Aplan-CEM-PreTreatment	chr8	93782423	93782423	A	G	TMEM67	c.1094A>G	p.Asn365Ser	missense_variant	MODERATE	27	0	0.041	25	7	0.318	2.44453
Aplan-CEM-ATC25-C1_vs_Aplan-CEM-PreTreatment	chr8	94692689	94692689	G	C	ESRP1	c.1833G>C	p.Ser611Ser	synonymous_variant	LOW	40	0	0.026	51	10	0.227	2.67365
Aplan-CEM-ATC25-C1_vs_Aplan-CEM-PreTreatment	chr8	96145267	96145267	G	C	GDF6	c.664C>G	p.Arg222Gly	missense_variant	MODERATE	37	0	0.027	69	18	0.297	3.6223
Aplan-CEM-ATC25-C1_vs_Aplan-CEM-PreTreatment	chr8	97277443	97277443	A	AT	TSPYL5	c.401dupA	p.Asn134fs	frameshift_variant	HIGH	76	0	0.014	120	27	0.231	5.72316
Aplan-CEM-ATC25-C1_vs_Aplan-CEM-PreTreatment	chr8	97277449	97277449	C	G	TSPYL5	c.396G>C	p.Pro132Pro	synonymous_variant	LOW	77	0	0.014	124	28	0.227	6.1068
Aplan-CEM-ATC25-C1_vs_Aplan-CEM-PreTreatment	chr8	97277747	97277747	G	C	TSPYL5	c.98C>G	p.Pro33Arg	missense_variant	MODERATE	57	0	0.023	93	26	0.285	5.67156
Aplan-CEM-ATC25-C1_vs_Aplan-CEM-PreTreatment	chr8	98428101	98428101	C	G	KCNS2	c.122C>G	p.Thr41Arg	missense_variant	MODERATE	46	0	0.025	84	19	0.225	3.83674
Aplan-CEM-ATC25-C1_vs_Aplan-CEM-PreTreatment	chr8	99848842	99848842	A	G	VPS13B	c.10084A>G	p.Ile3362Val	missense_variant	MODERATE	36	0	0.031	58	19	0.314	4.48202
Aplan-CEM-ATC25-C1_vs_Aplan-CEM-PreTreatment	chr8	100141079	100141079	G	A	FBXO43	c.1175C>T	p.Ser392Leu	missense_variant	MODERATE	66	0	0.017	92	19	0.237	4.6677
Aplan-CEM-ATC25-C1_vs_Aplan-CEM-PreTreatment	chr8	100287987	100287987	C	G	RNF19A	c.188G>C	p.Arg63Thr	missense_variant	MODERATE	64	0	0.018	58	17	0.296	6.11381
Aplan-CEM-ATC25-C1_vs_Aplan-CEM-PreTreatment	chr8	102277120	102277121	CT	C	UBR5	c.6360delA	p.Glu2121fs	frameshift_variant	HIGH	69	0	0.018	65	34	0.541	6.12515
Aplan-CEM-ATC25-C1_vs_Aplan-CEM-PreTreatment	chr8	102552034	102552034	C	T	ODF1	c.307C>T	p.Arg103*	stop_gained	HIGH	41	0	0.026	45	21	0.463	6.55136
Aplan-CEM-ATC25-C1_vs_Aplan-CEM-PreTreatment	chr8	103375958	103375958	C	T	CTHRC1	c.371C>T	p.Ala124Val	missense_variant&splice_region_variant	MODERATE	49	0	0.024	59	33	0.549	6.23186
Aplan-CEM-ATC25-C1_vs_Aplan-CEM-PreTreatment	chr8	104148766	104148766	G	A	RIMS2	c.3306G>A	p.Arg1102Arg	synonymous_variant	LOW	28	0	0.038	65	25	0.404	4.59176
Aplan-CEM-ATC25-C1_vs_Aplan-CEM-PreTreatment	chr8	109464900	109464900	G	T	PKHD1L1	c.8068G>T	p.Ala2690Ser	missense_variant	MODERATE	56	0	0.018	80	41	0.507	5.96639
Aplan-CEM-ATC25-C1_vs_Aplan-CEM-PreTreatment	chr8	117822545	117822545	T	C	EXT1	c.1337A>G	p.Asn446Ser	missense_variant	MODERATE	34	0	0.032	34	10	0.323	3.0448
Aplan-CEM-ATC25-C1_vs_Aplan-CEM-PreTreatment	chr8	120231550	120231550	G	C	COL14A1	c.2281G>C	p.Asp761His	missense_variant	MODERATE	42	0	0.029	54	13	0.272	3.36773
Aplan-CEM-ATC25-C1_vs_Aplan-CEM-PreTreatment	chr8	121628830	121628830	C	G	HAS2	c.511G>C	p.Val171Leu	missense_variant	MODERATE	26	0	0.045	55	13	0.275	2.14826
Aplan-CEM-ATC25-C1_vs_Aplan-CEM-PreTreatment	chr8	123255827	123255828	GT	G	ZHX1	c.119delA	p.Asn40fs	frameshift_variant	HIGH	68	0	0.017	100	56	0.52	6.09315
Aplan-CEM-ATC25-C1_vs_Aplan-CEM-PreTreatment	chr8	126556843	126556843	G	A	FAM84B	c.547C>T	p.Arg183Cys	missense_variant	MODERATE	57	0	0.018	132	74	0.53	6.18085
Aplan-CEM-ATC25-C1_vs_Aplan-CEM-PreTreatment	chr8	131040211	131040211	C	G	ADCY8	c.123G>C	p.Ala41Ala	synonymous_variant	LOW	41	0	0.026	80	31	0.382	5.93237
Aplan-CEM-ATC25-C1_vs_Aplan-CEM-PreTreatment	chr8	132098909	132098909	T	G	HHLA1	c.361A>C	p.Asn121His	missense_variant	MODERATE	31	0	0.042	36	8	0.273	2.23292
Aplan-CEM-ATC25-C1_vs_Aplan-CEM-PreTreatment	chr8	132886724	132886724	G	A	TG	c.1352G>A	p.Arg451Gln	missense_variant	MODERATE	85	0	0.013	93	34	0.379	6.0936
Aplan-CEM-ATC25-C1_vs_Aplan-CEM-PreTreatment	chr8	133131826	133131826	C	T	TG	c.7877C>T	p.Ala2626Val	missense_variant	MODERATE	59	0	0.02	81	35	0.433	5.90852
Aplan-CEM-ATC25-C1_vs_Aplan-CEM-PreTreatment	chr8	133258409	133258409	C	T	NDRG1	c.407G>A	p.Gly136Asp	missense_variant	MODERATE	36	0	0.029	35	9	0.312	3.02315
Aplan-CEM-ATC25-C1_vs_Aplan-CEM-PreTreatment	chr8	138690847	138690848	CG	C	COL22A1	c.2781delC	p.Gly928fs	frameshift_variant	HIGH	23	0	0.054	57	33	0.552	6.42269
Aplan-CEM-ATC25-C1_vs_Aplan-CEM-PreTreatment	chr8	140793388	140793388	C	G	PTK2	c.1226-4G>C		splice_region_variant&intron_variant	LOW	32	0	0.037	49	13	0.251	2.94533
Aplan-CEM-ATC25-C1_vs_Aplan-CEM-PreTreatment	chr8	140800538	140800538	C	G	PTK2	c.1146G>C	p.Glu382Asp	missense_variant	MODERATE	26	0	0.043	38	12	0.294	3.03776
Aplan-CEM-ATC25-C1_vs_Aplan-CEM-PreTreatment	chr8	142477239	142477239	C	G	ADGRB1	c.1183C>G	p.Arg395Gly	missense_variant	MODERATE	62	0	0.018	99	25	0.231	5.71653
Aplan-CEM-ATC25-C1_vs_Aplan-CEM-PreTreatment	chr8	142700601	142700601	A	G	LY6K	c.74A>G	p.Gln25Arg	missense_variant	MODERATE	43	0	0.026	83	35	0.412	5.84424
Aplan-CEM-ATC25-C1_vs_Aplan-CEM-PreTreatment	chr8	143379042	143379042	G	C	RHPN1	c.715G>C	p.Ala239Pro	missense_variant	MODERATE	37	0	0.025	63	12	0.216	2.48932
Aplan-CEM-ATC25-C1_vs_Aplan-CEM-PreTreatment	chr8	143920189	143920189	G	C	PLEC	c.10043C>G	p.Pro3348Arg	missense_variant	MODERATE	63	0	0.016	87	20	0.226	5.02878
Aplan-CEM-ATC25-C1_vs_Aplan-CEM-PreTreatment	chr8	143925709	143925709	G	T	PLEC	c.4631C>A	p.Ala1544Glu	missense_variant	MODERATE	49	0	0.02	84	24	0.318	5.11213
Aplan-CEM-ATC25-C1_vs_Aplan-CEM-PreTreatment	chr8	143985564	143985564	G	A	PARP10	c.557C>T	p.Ala186Val	missense_variant	MODERATE	88	0	0.012	95	22	0.252	6.07966
Aplan-CEM-ATC25-C1_vs_Aplan-CEM-PreTreatment	chr8	144355994	144355995	GC	G	FBXL6	c.1445delG	p.Gly482fs	frameshift_variant	HIGH	75	0	0.015	98	46	0.477	5.79832
Aplan-CEM-ATC25-C1_vs_Aplan-CEM-PreTreatment	chr8	144396743	144396744	TG	T	CPSF1	c.2683-3delC		splice_region_variant&intron_variant	LOW	61	1	0.035	82	20	0.241	4.16402
Aplan-CEM-ATC25-C1_vs_Aplan-CEM-PreTreatment	chr8	144414072	144414072	G	C	SLC39A4	c.1173C>G	p.Ser391Arg	missense_variant	MODERATE	109	0	0.011	114	26	0.222	5.96138
Aplan-CEM-ATC25-C1_vs_Aplan-CEM-PreTreatment	chr8	144424008	144424008	G	A	VPS28	c.581C>T	p.Ala194Val	missense_variant	MODERATE	76	0	0.015	128	65	0.491	5.68282
Aplan-CEM-ATC25-C1_vs_Aplan-CEM-PreTreatment	chr8	144424227	144424227	G	C	VPS28	c.444C>G	p.Arg148Arg	synonymous_variant	LOW	65	0	0.017	114	32	0.273	5.96084
Aplan-CEM-ATC25-C1_vs_Aplan-CEM-PreTreatment	chr8	144452481	144452481	G	C	CYHR1	c.701C>G	p.Pro234Arg	missense_variant	MODERATE	50	0	0.023	119	22	0.202	3.5222
Aplan-CEM-ATC25-C1_vs_Aplan-CEM-PreTreatment	chr8	144453288	144453288	C	T	CYHR1	c.545G>A	p.Gly182Asp	missense_variant	MODERATE	58	0	0.018	84	21	0.24	5.25562
Aplan-CEM-ATC25-C1_vs_Aplan-CEM-PreTreatment	chr8	144472689	144472689	G	A	KIFC2	c.1844G>A	p.Arg615His	missense_variant	MODERATE	48	0	0.021	93	27	0.312	5.26509
Aplan-CEM-ATC25-C1_vs_Aplan-CEM-PreTreatment	chr8	144500330	144500330	T	C	PPP1R16A	c.644T>C	p.Ile215Thr	missense_variant	MODERATE	89	0	0.012	105	33	0.33	5.80268
Aplan-CEM-ATC25-C1_vs_Aplan-CEM-PreTreatment	chr8	144509999	144509999	G	A	MFSD3	c.666G>A	p.Val222Val	synonymous_variant	LOW	59	0	0.019	116	35	0.311	6.37968
Aplan-CEM-ATC25-C1_vs_Aplan-CEM-PreTreatment	chr8	144528271	144528271	T	C	C8orf82	c.285A>G	p.Ala95Ala	synonymous_variant	LOW	44	0	0.024	71	36	0.515	6.07521
Aplan-CEM-ATC25-C1_vs_Aplan-CEM-PreTreatment	chr8	144773402	144773402	G	C	ZNF34	c.1547C>G	p.Thr516Arg	missense_variant	MODERATE	86	0	0.012	139	40	0.27	6.38318
Aplan-CEM-ATC25-C1_vs_Aplan-CEM-PreTreatment	chr8	144773515	144773515	G	T	ZNF34	c.1434C>A	p.Ser478Arg	missense_variant	MODERATE	105	0	0.01	140	30	0.227	6.28892
Aplan-CEM-ATC25-C1_vs_Aplan-CEM-PreTreatment	chr8	144778467	144778467	G	A	ZNF34	c.68C>T	p.Ala23Val	missense_variant	MODERATE	31	0	0.033	54	21	0.364	4.85305
Aplan-CEM-ATC25-C1_vs_Aplan-CEM-PreTreatment	chr9	711557	711557	G	C	KANK1	c.791G>C	p.Arg264Pro	missense_variant	MODERATE	34	0	0.03	39	20	0.5	6.47885
Aplan-CEM-ATC25-C1_vs_Aplan-CEM-PreTreatment	chr9	3271005	3271005	C	T	RFX3	c.1200G>A	p.Ser400Ser	splice_region_variant&synonymous_variant	LOW	24	0	0.044	21	21	0.944	6.10319
Aplan-CEM-ATC25-C1_vs_Aplan-CEM-PreTreatment	chr9	4583075	4583075	G	A	SLC1A1	c.1231G>A	p.Val411Met	missense_variant	MODERATE	24	0	0.045	36	23	0.594	6.67949
Aplan-CEM-ATC25-C1_vs_Aplan-CEM-PreTreatment	chr9	5772659	5772659	C	T	RIC1	c.3712C>T	p.Leu1238Phe	missense_variant	MODERATE	11	0	0.091	30	30	0.957	6.97979
Aplan-CEM-ATC25-C1_vs_Aplan-CEM-PreTreatment	chr9	5801291	5801292	GT	G	ERMP1	c.1951delA	p.Thr651fs	frameshift_variant	HIGH	13	0	0.077	17	13	0.716	4.663
Aplan-CEM-ATC25-C1_vs_Aplan-CEM-PreTreatment	chr9	5922421	5922421	G	C	KIAA2026	c.3575C>G	p.Ser1192Cys	missense_variant	MODERATE	29	0	0.036	28	15	0.519	5.7702
Aplan-CEM-ATC25-C1_vs_Aplan-CEM-PreTreatment	chr9	12821670	12821670	G	T	LURAP1L	c.597G>T	p.Leu199Phe	missense_variant	MODERATE	30	0	0.036	39	15	0.4	4.26258
Aplan-CEM-ATC25-C1_vs_Aplan-CEM-PreTreatment	chr9	17409365	17409365	T	C	CNTLN	c.2688T>C	p.Pro896Pro	synonymous_variant	LOW	19	0	0.059	19	13	0.688	4.99908
Aplan-CEM-ATC25-C1_vs_Aplan-CEM-PreTreatment	chr9	27455484	27455484	G	A	MOB3B	c.67C>T	p.Pro23Ser	missense_variant	MODERATE	30	0	0.035	35	35	0.971	5.99484
Aplan-CEM-ATC25-C1_vs_Aplan-CEM-PreTreatment	chr9	32418508	32418508	T	TG	ACO1	c.658+1dupG	p.V221Cfs*5	splice_donor_variant&intron_variant	HIGH	34	0	0.029	43	13	0.342	3.47829
Aplan-CEM-ATC25-C1_vs_Aplan-CEM-PreTreatment	chr9	32481431	32481431	A	G	DDX58	c.1547T>C	p.Val516Ala	missense_variant	MODERATE	30	0	0.036	41	9	0.25	2.09052
Aplan-CEM-ATC25-C1_vs_Aplan-CEM-PreTreatment	chr9	32633673	32633673	C	T	TAF1L	c.1907G>A	p.Arg636His	missense_variant	MODERATE	172	0	0.006176	160	42	0.275	5.78114
Aplan-CEM-ATC25-C1_vs_Aplan-CEM-PreTreatment	chr9	33986768	33986768	C	G	UBAP2	c.512G>C	p.Arg171Pro	missense_variant	MODERATE	25	0	0.043	33	14	0.448	4.00839
Aplan-CEM-ATC25-C1_vs_Aplan-CEM-PreTreatment	chr9	35658634	35658635	GG	TT	CCDC107	c.165_166delGGinsTT	p.LysAsp55AsnTyr	missense_variant	MODERATE	19	0	0.052	25	10	0.384	2.64104
Aplan-CEM-ATC25-C1_vs_Aplan-CEM-PreTreatment	chr9	35689742	35689742	C	A	TPM2	c.76G>T	p.Glu26*	stop_gained	HIGH	96	0	0.012	88	25	0.305	5.87037
Aplan-CEM-ATC25-C1_vs_Aplan-CEM-PreTreatment	chr9	35738067	35738067	C	G	GBA2	c.2283G>C	p.Lys761Asn	missense_variant	MODERATE	27	0	0.038	35	10	0.303	2.47997
Aplan-CEM-ATC25-C1_vs_Aplan-CEM-PreTreatment	chr9	36136781	36136781	G	C	GLIPR2	c.3G>C	p.Met1?	start_lost	HIGH	27	0	0.039	29	11	0.384	3.49497
Aplan-CEM-ATC25-C1_vs_Aplan-CEM-PreTreatment	chr9	36170411	36170411	G	C	CCIN	c.909G>C	p.Gln303His	missense_variant	MODERATE	73	0	0.015	84	22	0.285	6.31597
Aplan-CEM-ATC25-C1_vs_Aplan-CEM-PreTreatment	chr9	36369798	36369798	G	C	RNF38	c.491C>G	p.Pro164Arg	missense_variant	MODERATE	55	0	0.023	46	15	0.342	5.76448
Aplan-CEM-ATC25-C1_vs_Aplan-CEM-PreTreatment	chr9	37006530	37006530	G	C	PAX5	c.418C>G	p.Arg140Gly	missense_variant	MODERATE	25	0	0.042	19	6	0.375	2.41526
Aplan-CEM-ATC25-C1_vs_Aplan-CEM-PreTreatment	chr9	37126527	37126527	G	C	ZCCHC7	c.195G>C	p.Ser65Ser	synonymous_variant	LOW	65	0	0.017	69	26	0.333	6.47314
Aplan-CEM-ATC25-C1_vs_Aplan-CEM-PreTreatment	chr9	37782085	37782085	G	C	EXOSC3	c.527C>G	p.Pro176Arg	missense_variant	MODERATE	48	0	0.025	32	15	0.439	7.06929
Aplan-CEM-ATC25-C1_vs_Aplan-CEM-PreTreatment	chr9	38620122	38620122	G	C	ANKRD18A	c.164C>G	p.Thr55Arg	missense_variant	MODERATE	83	0	0.013	71	22	0.333	6.32681
Aplan-CEM-ATC25-C1_vs_Aplan-CEM-PreTreatment	chr9	69516863	69516863	G	C	APBA1	c.348C>G	p.Ser116Arg	missense_variant	MODERATE	72	0	0.015	53	15	0.274	6.16145
Aplan-CEM-ATC25-C1_vs_Aplan-CEM-PreTreatment	chr9	74796801	74796801	G	C	TRPM6	c.2331C>G	p.Phe777Leu	missense_variant	MODERATE	34	0	0.034	30	15	0.556	6.01215
Aplan-CEM-ATC25-C1_vs_Aplan-CEM-PreTreatment	chr9	77019830	77019830	A	G	FOXB2	c.176A>G	p.Asn59Ser	missense_variant	MODERATE	53	0	0.021	80	23	0.286	5.62459
Aplan-CEM-ATC25-C1_vs_Aplan-CEM-PreTreatment	chr9	77797601	77797601	G	A	GNAQ	c.524C>T	p.Thr175Met	missense_variant	MODERATE	25	0	0.043	35	15	0.429	3.91286
Aplan-CEM-ATC25-C1_vs_Aplan-CEM-PreTreatment	chr9	78031107	78031107	C	G	GNAQ	c.129G>C	p.Leu43Leu	synonymous_variant	LOW	25	0	0.049	22	7	0.364	2.56676
Aplan-CEM-ATC25-C1_vs_Aplan-CEM-PreTreatment	chr9	81991444	81991444	C	G	SPATA31D1	c.974C>G	p.Pro325Arg	missense_variant	MODERATE	169	0	0.006562	172	64	0.36	5.80283
Aplan-CEM-ATC25-C1_vs_Aplan-CEM-PreTreatment	chr9	85633016	85633016	A	G	AGTPBP1	c.1817T>C	p.Met606Thr	missense_variant	MODERATE	54	0	0.019	55	42	0.765	6.30237
Aplan-CEM-ATC25-C1_vs_Aplan-CEM-PreTreatment	chr9	85669523	85669523	G	C	AGTPBP1	c.780C>G	p.Ile260Met	missense_variant	MODERATE	26	0	0.043	13	5	0.417	2.65066
Aplan-CEM-ATC25-C1_vs_Aplan-CEM-PreTreatment	chr9	87703137	87703137	G	A	DAPK1	c.2980G>A	p.Asp994Asn	missense_variant	MODERATE	17	0	0.063	17	7	0.421	2.14085
Aplan-CEM-ATC25-C1_vs_Aplan-CEM-PreTreatment	chr9	88544373	88544373	C	G	NXNL2	c.303-6C>G		splice_region_variant&intron_variant	LOW	17	0	0.054	40	13	0.368	2.22879
Aplan-CEM-ATC25-C1_vs_Aplan-CEM-PreTreatment	chr9	90843943	90843944	CT	C	SYK	c.50delT	p.Phe17fs	frameshift_variant	HIGH	49	0	0.02	55	22	0.396	6.74115
Aplan-CEM-ATC25-C1_vs_Aplan-CEM-PreTreatment	chr9	93010326	93010326	G	A	FGD3	c.918G>A	p.Leu306Leu	synonymous_variant	LOW	38	0	0.029	65	26	0.368	6.12921
Aplan-CEM-ATC25-C1_vs_Aplan-CEM-PreTreatment	chr9	93022359	93022359	G	A	FGD3	c.1527G>A	p.Val509Val	synonymous_variant	LOW	48	0	0.026	40	12	0.278	4.56537
Aplan-CEM-ATC25-C1_vs_Aplan-CEM-PreTreatment	chr9	93451416	93451416	G	C		n.93451416G>C		TF_binding_site_variant	LOW	58	0	0.017	53	20	0.36	6.41747
Aplan-CEM-ATC25-C1_vs_Aplan-CEM-PreTreatment	chr9	94104383	94104383	A	G	PTPDC1	c.2308A>G	p.Lys770Glu	missense_variant&splice_region_variant	MODERATE	23	0	0.052	27	9	0.4	2.6582
Aplan-CEM-ATC25-C1_vs_Aplan-CEM-PreTreatment	chr9	95477596	95477596	A	C	PTCH1	c.1454T>G	p.Leu485Arg	missense_variant	MODERATE	46	0	0.022	72	17	0.238	3.9709
Aplan-CEM-ATC25-C1_vs_Aplan-CEM-PreTreatment	chr9	95477646	95477646	G	T	PTCH1	c.1404C>A	p.Ala468Ala	synonymous_variant	LOW	47	0	0.024	67	23	0.364	5.85034
Aplan-CEM-ATC25-C1_vs_Aplan-CEM-PreTreatment	chr9	97037544	97037544	G	A	CTSV	c.198C>T	p.Tyr66Tyr	synonymous_variant	LOW	57	0	0.021	65	25	0.382	6.27861
Aplan-CEM-ATC25-C1_vs_Aplan-CEM-PreTreatment	chr9	97362335	97362335	T	C	CCDC180	c.3928T>C	p.Ser1310Pro	missense_variant	MODERATE	76	1	0.015	64	19	0.307	5.66904
Aplan-CEM-ATC25-C1_vs_Aplan-CEM-PreTreatment	chr9	98473244	98473244	G	A	GABBR2	c.901C>T	p.Arg301Cys	missense_variant	MODERATE	25	0	0.045	26	9	0.318	2.76992
Aplan-CEM-ATC25-C1_vs_Aplan-CEM-PreTreatment	chr9	99016040	99016040	G	T	COL15A1	c.1568G>T	p.Gly523Val	missense_variant	MODERATE	39	0	0.028	41	10	0.244	2.97183
Aplan-CEM-ATC25-C1_vs_Aplan-CEM-PreTreatment	chr9	99054623	99054624	GA	G	COL15A1	c.3003delA	p.Gly1002fs	frameshift_variant	HIGH	51	0	0.024	51	17	0.333	5.51161
Aplan-CEM-ATC25-C1_vs_Aplan-CEM-PreTreatment	chr9	101535543	101535543	C	T	RNF20	c.120C>T	p.Val40Val	synonymous_variant	LOW	27	0	0.041	32	9	0.269	2.58417
Aplan-CEM-ATC25-C1_vs_Aplan-CEM-PreTreatment	chr9	101547457	101547457	G	T	RNF20	c.1031G>T	p.Cys344Phe	missense_variant	MODERATE	42	0	0.026	53	21	0.411	5.8033
Aplan-CEM-ATC25-C1_vs_Aplan-CEM-PreTreatment	chr9	101737779	101737779	G	C	GRIN3A	c.201C>G	p.Arg67Arg	synonymous_variant	LOW	29	0	0.035	42	18	0.41	4.87504
Aplan-CEM-ATC25-C1_vs_Aplan-CEM-PreTreatment	chr9	104695441	104695441	T	A	OR13D1	c.1020T>A	p.His340Gln	missense_variant	MODERATE	23	0	0.042	27	10	0.36	3.03029
Aplan-CEM-ATC25-C1_vs_Aplan-CEM-PreTreatment	chr9	104796073	104796073	G	C	ABCA1	c.5362C>G	p.Leu1788Val	missense_variant	MODERATE	58	0	0.02	60	19	0.321	6.13959
Aplan-CEM-ATC25-C1_vs_Aplan-CEM-PreTreatment	chr9	105461561	105461561	C	G	FSD1L	c.57C>G	p.Ala19Ala	synonymous_variant	LOW	18	0	0.067	22	8	0.333	2.32541
Aplan-CEM-ATC25-C1_vs_Aplan-CEM-PreTreatment	chr9	107489206	107489206	G	C	KLF4	c.-34C>G		5_prime_UTR_premature_start_codon_gain_variant	LOW	37	1	0.034	37	12	0.314	2.86077
Aplan-CEM-ATC25-C1_vs_Aplan-CEM-PreTreatment	chr9	110579211	110579211	G	C	SVEP1	c.333C>G	p.Ser111Ser	synonymous_variant	LOW	82	1	0.014	89	27	0.307	5.8054
Aplan-CEM-ATC25-C1_vs_Aplan-CEM-PreTreatment	chr9	112251060	112251060	C	G	PTBP3	c.773G>C	p.Arg258Pro	missense_variant	MODERATE	37	0	0.029	35	10	0.303	3.46551
Aplan-CEM-ATC25-C1_vs_Aplan-CEM-PreTreatment	chr9	112416892	112416892	C	G	HSDL2	c.447C>G	p.L149L	structural_interaction_variant	HIGH	19	0	0.067	13	5	0.333	2.19443
Aplan-CEM-ATC25-C1_vs_Aplan-CEM-PreTreatment	chr9	114048798	114048798	T	C	ZNF618	c.1496T>C	p.Leu499Ser	missense_variant	MODERATE	79	0	0.014	72	23	0.354	6.64925
Aplan-CEM-ATC25-C1_vs_Aplan-CEM-PreTreatment	chr9	114167901	114167901	G	T	COL27A1	c.346G>T	p.Ala116Ser	missense_variant	MODERATE	64	0	0.018	56	26	0.472	5.96812
Aplan-CEM-ATC25-C1_vs_Aplan-CEM-PreTreatment	chr9	114301086	114301086	C	G	COL27A1	c.4716C>G	p.Ile1572Met	missense_variant	MODERATE	29	0	0.036	37	12	0.351	3.18918
Aplan-CEM-ATC25-C1_vs_Aplan-CEM-PreTreatment	chr9	114301458	114301458	C	G	COL27A1	c.4805C>G	p.Pro1602Arg	missense_variant	MODERATE	55	0	0.02	53	12	0.227	4.01923
Aplan-CEM-ATC25-C1_vs_Aplan-CEM-PreTreatment	chr9	114310682	114310682	C	G	COL27A1	c.5570C>G	p.Ala1857Gly	missense_variant	MODERATE	53	0	0.022	48	12	0.256	4.23326
Aplan-CEM-ATC25-C1_vs_Aplan-CEM-PreTreatment	chr9	114323687	114323687	G	C	ORM1	c.139G>C	p.Ala47Pro	missense_variant	MODERATE	65	0	0.017	59	19	0.326	5.92147
Aplan-CEM-ATC25-C1_vs_Aplan-CEM-PreTreatment	chr9	114347778	114347778	C	G	AKNA	c.3344G>C	p.Arg1115Pro	missense_variant	MODERATE	75	0	0.017	71	14	0.23	4.69958
Aplan-CEM-ATC25-C1_vs_Aplan-CEM-PreTreatment	chr9	114351025	114351025	G	C	AKNA	c.3059-4C>G		splice_region_variant&intron_variant	LOW	46	0	0.026	30	13	0.467	6.1056
Aplan-CEM-ATC25-C1_vs_Aplan-CEM-PreTreatment	chr9	114358091	114358091	C	G	AKNA	c.2569G>C	p.Gly857Arg	missense_variant	MODERATE	61	0	0.02	74	22	0.295	6.37043
Aplan-CEM-ATC25-C1_vs_Aplan-CEM-PreTreatment	chr9	114368471	114368471	G	C	AKNA	c.1541C>G	p.Pro514Arg	missense_variant	MODERATE	28	0	0.034	37	12	0.343	3.17735
Aplan-CEM-ATC25-C1_vs_Aplan-CEM-PreTreatment	chr9	114368476	114368476	C	G	AKNA	c.1536G>C	p.Pro512Pro	synonymous_variant	LOW	27	0	0.034	35	16	0.424	4.76633
Aplan-CEM-ATC25-C1_vs_Aplan-CEM-PreTreatment	chr9	114376646	114376646	C	G	AKNA	c.1161G>C	p.Lys387Asn	missense_variant	MODERATE	91	0	0.012	109	35	0.309	5.94147
Aplan-CEM-ATC25-C1_vs_Aplan-CEM-PreTreatment	chr9	114377151	114377151	C	G	AKNA	c.656G>C	p.Trp219Ser	missense_variant	MODERATE	74	0	0.014	76	34	0.442	6.4002
Aplan-CEM-ATC25-C1_vs_Aplan-CEM-PreTreatment	chr9	114377398	114377398	C	G	AKNA	c.409G>C	p.Ala137Pro	missense_variant	MODERATE	87	0	0.013	60	31	0.491	6.17757
Aplan-CEM-ATC25-C1_vs_Aplan-CEM-PreTreatment	chr9	114377402	114377402	C	G	AKNA	c.405G>C	p.Glu135Asp	missense_variant	MODERATE	86	0	0.013	58	30	0.491	5.88418
Aplan-CEM-ATC25-C1_vs_Aplan-CEM-PreTreatment	chr9	114406359	114406359	C	G	WHRN	c.2232G>C	p.Thr744Thr	synonymous_variant	LOW	61	0	0.018	46	15	0.328	6.16836
Aplan-CEM-ATC25-C1_vs_Aplan-CEM-PreTreatment	chr9	114406691	114406691	C	G	WHRN	c.1900G>C	p.Ala634Pro	missense_variant	MODERATE	101	0	0.012	76	15	0.224	5.88471
Aplan-CEM-ATC25-C1_vs_Aplan-CEM-PreTreatment	chr9	114406711	114406711	C	G	WHRN	c.1880G>C	p.Arg627Pro	missense_variant	MODERATE	99	0	0.012	69	13	0.213	5.34075
Aplan-CEM-ATC25-C1_vs_Aplan-CEM-PreTreatment	chr9	116729052	116729052	G	C	ASTN2	c.2566C>G	p.Gln856Glu	missense_variant	MODERATE	27	0	0.042	39	10	0.29	2.40675
Aplan-CEM-ATC25-C1_vs_Aplan-CEM-PreTreatment	chr9	117714319	117714319	C	G	TLR4	c.2191C>G	p.Arg731Gly	missense_variant	MODERATE	47	0	0.023	66	22	0.329	5.44824
Aplan-CEM-ATC25-C1_vs_Aplan-CEM-PreTreatment	chr9	119167869	119167869	C	G	BRINP1	c.1501G>C	p.Val501Leu	missense_variant	MODERATE	50	0	0.021	61	12	0.214	3.32558
Aplan-CEM-ATC25-C1_vs_Aplan-CEM-PreTreatment	chr9	120865761	120865761	C	G	PHF19	c.906G>C	p.Glu302Asp	missense_variant	MODERATE	34	0	0.033	37	14	0.387	4.5065
Aplan-CEM-ATC25-C1_vs_Aplan-CEM-PreTreatment	chr9	120961500	120961500	C	G	C5	c.4570G>C	p.Ala1524Pro	missense_variant	MODERATE	16	0	0.077	12	5	0.461	2.09374
Aplan-CEM-ATC25-C1_vs_Aplan-CEM-PreTreatment	chr9	122214454	122214454	G	C		n.122214454C>G		TF_binding_site_variant	LOW	41	0	0.031	28	9	0.399	3.91409
Aplan-CEM-ATC25-C1_vs_Aplan-CEM-PreTreatment	chr9	122381358	122381358	A	AC	PTGS1	c.590-7dupC		splice_region_variant&intron_variant	LOW	27	0	0.034	38	30	0.802	6.87625
Aplan-CEM-ATC25-C1_vs_Aplan-CEM-PreTreatment	chr9	124021148	124021148	A	G	LHX2	c.792A>G	p.Pro264Pro	synonymous_variant	LOW	45	0	0.026	52	14	0.297	4.15976
Aplan-CEM-ATC25-C1_vs_Aplan-CEM-PreTreatment	chr9	124787111	124787111	C	G	OLFML2A	c.227C>G	p.Thr76Arg	missense_variant	MODERATE	46	0	0.024	44	12	0.283	4.1135
Aplan-CEM-ATC25-C1_vs_Aplan-CEM-PreTreatment	chr9	124856493	124856493	G	T	WDR38	c.511G>T	p.Val171Leu	missense_variant	MODERATE	60	0	0.019	91	32	0.325	5.99611
Aplan-CEM-ATC25-C1_vs_Aplan-CEM-PreTreatment	chr9	125239283	125239283	C	G	HSPA5	c.654G>C	p.K218N	structural_interaction_variant	HIGH	51	2	0.023	57	13	0.226	2.30157
Aplan-CEM-ATC25-C1_vs_Aplan-CEM-PreTreatment	chr9	126340561	126340561	G	T	MVB12B	c.135G>T	p.Thr45Thr	synonymous_variant	LOW	46	0	0.026	40	10	0.258	3.62089
Aplan-CEM-ATC25-C1_vs_Aplan-CEM-PreTreatment	chr9	126421885	126421885	C	G	MVB12B	c.694C>G	p.Arg232Gly	missense_variant	MODERATE	21	0	0.054	28	12	0.475	3.35659
Aplan-CEM-ATC25-C1_vs_Aplan-CEM-PreTreatment	chr9	127108406	127108406	A	G	ANGPTL2	c.326T>C	p.Leu109Pro	missense_variant	MODERATE	89	0	0.012	85	49	0.575	6.26186
Aplan-CEM-ATC25-C1_vs_Aplan-CEM-PreTreatment	chr9	127444016	127444017	AT	A	ZNF79	c.329-4delT		splice_region_variant&intron_variant	LOW	39	1	0.055	29	25	0.86	6.15692
Aplan-CEM-ATC25-C1_vs_Aplan-CEM-PreTreatment	chr9	127491243	127491243	A	G	LRSAM1	c.1451A>G	p.Gln484Arg	missense_variant	MODERATE	37	0	0.033	30	22	0.741	6.95756
Aplan-CEM-ATC25-C1_vs_Aplan-CEM-PreTreatment	chr9	127507252	127507252	G	C	FAM129B	c.1834C>G	p.Leu612Val	missense_variant	MODERATE	57	0	0.019	77	30	0.427	6.39869
Aplan-CEM-ATC25-C1_vs_Aplan-CEM-PreTreatment	chr9	127675883	127675883	C	T	STXBP1	c.1190C>T	p.Ala397Val	missense_variant	MODERATE	59	0	0.021	75	49	0.644	6.13985
Aplan-CEM-ATC25-C1_vs_Aplan-CEM-PreTreatment	chr9	127714145	127714145	C	T	PTRH1	c.600G>A	p.Leu200Leu	synonymous_variant	LOW	66	0	0.018	66	26	0.373	5.93328
Aplan-CEM-ATC25-C1_vs_Aplan-CEM-PreTreatment	chr9	127788559	127788560	GC	G	CDK9	c.627delC	p.Ile210fs	frameshift_variant	HIGH	47	0	0.023	42	19	0.439	6.18379
Aplan-CEM-ATC25-C1_vs_Aplan-CEM-PreTreatment	chr9	127887494	127887495	TG	T	ST6GALNAC6	c.801delC	p.Asn268fs	frameshift_variant	HIGH	38	0	0.033	41	19	0.405	6.4992
Aplan-CEM-ATC25-C1_vs_Aplan-CEM-PreTreatment	chr9	127925265	127925265	C	T	PIP5KL1	c.764-5G>A		splice_region_variant&intron_variant	LOW	40	0	0.027	43	10	0.256	2.94433
Aplan-CEM-ATC25-C1_vs_Aplan-CEM-PreTreatment	chr9	128063564	128063564	C	G	NAIF1	c.848G>C	p.Ser283Thr	missense_variant	MODERATE	75	0	0.014	69	23	0.347	6.66586
Aplan-CEM-ATC25-C1_vs_Aplan-CEM-PreTreatment	chr9	128152205	128152205	G	A	LCN2	c.504G>A	p.Ser168Ser	synonymous_variant	LOW	39	0	0.03	47	13	0.286	3.7671
Aplan-CEM-ATC25-C1_vs_Aplan-CEM-PreTreatment	chr9	128170021	128170021	T	C	CIZ1	c.2120A>G	p.Lys707Arg	missense_variant&splice_region_variant	MODERATE	40	0	0.027	35	16	0.5	6.32345
Aplan-CEM-ATC25-C1_vs_Aplan-CEM-PreTreatment	chr9	128219132	128219132	C	G	DNM1	c.469C>G	p.R157G	structural_interaction_variant	HIGH	50	1	0.025	72	18	0.259	3.51409
Aplan-CEM-ATC25-C1_vs_Aplan-CEM-PreTreatment	chr9	128222584	128222584	C	G	DNM1	c.1116C>G	p.Phe372Leu	missense_variant	MODERATE	61	0	0.019	69	18	0.277	5.4407
Aplan-CEM-ATC25-C1_vs_Aplan-CEM-PreTreatment	chr9	128260595	128260596	TC	T	GOLGA2	c.1546delG	p.Glu516fs	frameshift_variant	HIGH	58	0	0.019	52	20	0.396	5.83653
Aplan-CEM-ATC25-C1_vs_Aplan-CEM-PreTreatment	chr9	128260764	128260764	C	G	GOLGA2	c.1378G>C	p.Glu460Gln	missense_variant	MODERATE	29	0	0.034	54	17	0.315	3.46003
Aplan-CEM-ATC25-C1_vs_Aplan-CEM-PreTreatment	chr9	128332182	128332182	C	G	COQ4	c.432C>G	p.Thr144Thr	synonymous_variant	LOW	48	0	0.024	43	14	0.314	5.13445
Aplan-CEM-ATC25-C1_vs_Aplan-CEM-PreTreatment	chr9	128355661	128355661	C	G	SLC27A4	c.1639C>G	p.Arg547Gly	missense_variant	MODERATE	63	0	0.018	103	34	0.341	6.23835
Aplan-CEM-ATC25-C1_vs_Aplan-CEM-PreTreatment	chr9	128389294	128389294	C	G	URM1	c.222C>G	p.Ala74Ala	synonymous_variant	LOW	73	0	0.015	95	36	0.369	6.09234
Aplan-CEM-ATC25-C1_vs_Aplan-CEM-PreTreatment	chr9	128536459	128536459	G	C	GLE1	c.1751G>C	p.Arg584Pro	missense_variant	MODERATE	38	0	0.029	53	12	0.232	2.97621
Aplan-CEM-ATC25-C1_vs_Aplan-CEM-PreTreatment	chr9	128706960	128706960	C	G	PKN3	c.588C>G	p.Gly196Gly	synonymous_variant	LOW	44	0	0.026	40	18	0.444	5.92016
Aplan-CEM-ATC25-C1_vs_Aplan-CEM-PreTreatment	chr9	128753393	128753393	C	G	ZER1	c.517G>C	p.Gly173Arg	missense_variant	MODERATE	80	0	0.014	57	18	0.333	6.08752
Aplan-CEM-ATC25-C1_vs_Aplan-CEM-PreTreatment	chr9	128753425	128753425	C	G	ZER1	c.485G>C	p.Cys162Ser	missense_variant	MODERATE	86	1	0.013	65	20	0.317	7.01925
Aplan-CEM-ATC25-C1_vs_Aplan-CEM-PreTreatment	chr9	128907196	128907196	C	G	LRRC8A	c.32C>G	p.Ala11Gly	missense_variant	MODERATE	60	0	0.019	51	20	0.348	5.8732
Aplan-CEM-ATC25-C1_vs_Aplan-CEM-PreTreatment	chr9	129875344	129875344	C	T	USP20	c.2083C>T	p.Gln695*	stop_gained	HIGH	46	0	0.023	51	12	0.239	3.55707
Aplan-CEM-ATC25-C1_vs_Aplan-CEM-PreTreatment	chr9	131446531	131446531	C	A	PRRC2B	c.744C>A	p.Ser248Arg	missense_variant	MODERATE	50	0	0.022	77	25	0.338	5.97502
Aplan-CEM-ATC25-C1_vs_Aplan-CEM-PreTreatment	chr9	131598196	131598196	C	T	RAPGEF1	c.2109+3G>A		splice_region_variant&intron_variant	LOW	28	0	0.038	20	8	0.368	3.47648
Aplan-CEM-ATC25-C1_vs_Aplan-CEM-PreTreatment	chr9	132921841	132921841	T	C	TSC1	c.641A>G	p.Glu214Gly	missense_variant	MODERATE	54	0	0.02	48	31	0.675	6.02922
Aplan-CEM-ATC25-C1_vs_Aplan-CEM-PreTreatment	chr9	133417738	133417739	CT	C	REXO4	c.106delA	p.Arg36fs	frameshift_variant	HIGH	61	0	0.017	36	14	0.417	6.86727
Aplan-CEM-ATC25-C1_vs_Aplan-CEM-PreTreatment	chr9	133444992	133444992	T	C	ADAMTS13	c.2550T>C	p.Asp850Asp	synonymous_variant	LOW	62	0	0.02	61	21	0.377	6.90761
Aplan-CEM-ATC25-C1_vs_Aplan-CEM-PreTreatment	chr9	133534795	133534795	G	T	ADAMTSL2	c.55G>T	p.Gly19Trp	missense_variant	MODERATE	70	0	0.016	59	47	0.765	5.9592
Aplan-CEM-ATC25-C1_vs_Aplan-CEM-PreTreatment	chr9	134041881	134041881	G	C	BRD3	c.1286C>G	p.Ala429Gly	missense_variant	MODERATE	53	0	0.022	56	24	0.44	5.95313
Aplan-CEM-ATC25-C1_vs_Aplan-CEM-PreTreatment	chr9	134053483	134053483	G	A	BRD3	c.-6C>T		5_prime_UTR_premature_start_codon_gain_variant	LOW	52	0	0.021	84	45	0.514	6.28234
Aplan-CEM-ATC25-C1_vs_Aplan-CEM-PreTreatment	chr9	134436546	134436546	C	A	RXRA	c.1321C>A	p.Leu441Ile	missense_variant	MODERATE	27	0	0.042	43	14	0.337	3.30859
Aplan-CEM-ATC25-C1_vs_Aplan-CEM-PreTreatment	chr9	135486868	135486868	G	T	PPP1R26	c.2358G>T	p.Ala786Ala	synonymous_variant	LOW	74	0	0.015	101	66	0.665	6.1789
Aplan-CEM-ATC25-C1_vs_Aplan-CEM-PreTreatment	chr9	136723625	136723625	G	A	FAM69B	c.1147G>A	p.Ala383Thr	missense_variant	MODERATE	91	0	0.013	78	24	0.304	6.10444
Aplan-CEM-ATC25-C1_vs_Aplan-CEM-PreTreatment	chr9	136853313	136853313	C	T	MAMDC4	c.183C>T	p.Gly61Gly	synonymous_variant	LOW	78	0	0.014	101	27	0.275	5.93792
Aplan-CEM-ATC25-C1_vs_Aplan-CEM-PreTreatment	chr9	136853539	136853539	C	G	MAMDC4	c.329-6C>G		splice_region_variant&intron_variant	LOW	97	0	0.011	88	34	0.391	6.08196
Aplan-CEM-ATC25-C1_vs_Aplan-CEM-PreTreatment	chr9	136857188	136857188	C	G	MAMDC4	c.2233C>G	p.Arg745Gly	missense_variant	MODERATE	71	0	0.014	99	29	0.304	5.80095
Aplan-CEM-ATC25-C1_vs_Aplan-CEM-PreTreatment	chr9	136858073	136858073	C	G	MAMDC4	c.2796C>G	p.Asp932Glu	missense_variant	MODERATE	57	0	0.02	48	12	0.266	4.44736
Aplan-CEM-ATC25-C1_vs_Aplan-CEM-PreTreatment	chr9	136858219	136858219	C	G	MAMDC4	c.2854C>G	p.His952Asp	missense_variant	MODERATE	61	0	0.017	47	15	0.311	6.06635
Aplan-CEM-ATC25-C1_vs_Aplan-CEM-PreTreatment	chr9	137156868	137156868	C	G	GRIN1	c.862C>G	p.Leu288Val	missense_variant	MODERATE	43	0	0.023	51	15	0.348	4.44446
Aplan-CEM-ATC25-C1_vs_Aplan-CEM-PreTreatment	chr9	137232134	137232134	C	A	SLC34A3	c.148C>A	p.Leu50Met	missense_variant	MODERATE	28	0	0.036	31	12	0.393	3.81465
Aplan-CEM-ATC25-C1_vs_Aplan-CEM-PreTreatment	chr9	137279155	137279155	G	A	TOR4A	c.466G>A	p.Ala156Thr	missense_variant	MODERATE	67	0	0.016	70	50	0.715	6.41365
Aplan-CEM-ATC25-C1_vs_Aplan-CEM-PreTreatment	chr9	137882747	137882747	G	C	CACNA1B	c.394G>C	p.Asp132His	missense_variant	MODERATE	30	0	0.035	54	16	0.295	3.42002
Aplan-CEM-ATC25-C1_vs_Aplan-CEM-PreTreatment	chr9	137971479	137971479	G	C	CACNA1B	c.1433G>C	p.Arg478Pro	missense_variant	MODERATE	28	0	0.04	37	16	0.412	4.65653
Aplan-CEM-ATC25-C1_vs_Aplan-CEM-PreTreatment	chr9	138013234	138013234	G	C	CACNA1B	c.2269G>C	p.Ala757Pro	missense_variant&splice_region_variant	MODERATE	19	0	0.067	26	12	0.524	3.3916
Aplan-CEM-ATC25-C1_vs_Aplan-CEM-PreTreatment	chr10	283307	283307	A	G	DIP2C	c.4457T>C	p.Phe1486Ser	missense_variant	MODERATE	55	0	0.021	82	33	0.415	5.8812
Aplan-CEM-ATC25-C1_vs_Aplan-CEM-PreTreatment	chr10	5640731	5640731	C	CG	ASB13	c.808dupC	p.Arg270fs	frameshift_variant	HIGH	64	0	0.017	81	17	0.231	4.53955
Aplan-CEM-ATC25-C1_vs_Aplan-CEM-PreTreatment	chr10	7799840	7799840	C	T	ATP5C1	c.497C>T	p.Ala166Val	missense_variant	MODERATE	47	0	0.024	67	23	0.321	5.85034
Aplan-CEM-ATC25-C1_vs_Aplan-CEM-PreTreatment	chr10	11869791	11869791	G	A	PROSER2	c.693G>A	p.Arg231Arg	synonymous_variant	LOW	58	0	0.019	69	31	0.464	6.0702
Aplan-CEM-ATC25-C1_vs_Aplan-CEM-PreTreatment	chr10	13616536	13616536	C	G	PRPF18	c.931C>G	p.Gln311Glu	missense_variant	MODERATE	39	0	0.029	60	17	0.268	4.10438
Aplan-CEM-ATC25-C1_vs_Aplan-CEM-PreTreatment	chr10	13657153	13657154	GC	G	FRMD4A	c.2435delG	p.Gly812fs	frameshift_variant	HIGH	35	0	0.028	49	11	0.228	2.6829
Aplan-CEM-ATC25-C1_vs_Aplan-CEM-PreTreatment	chr10	19607762	19607763	CT	C	MALRD1	c.5945-5delT		splice_region_variant&intron_variant	LOW	36	0	0.029	68	27	0.412	5.65122
Aplan-CEM-ATC25-C1_vs_Aplan-CEM-PreTreatment	chr10	21759296	21759296	A	G	DNAJC1	c.1470T>C	p.Ala490Ala	synonymous_variant	LOW	63	0	0.017	120	25	0.202	4.79879
Aplan-CEM-ATC25-C1_vs_Aplan-CEM-PreTreatment	chr10	24473476	24473476	C	T	KIAA1217	c.1095C>T	p.S365S	sequence_feature	MODERATE	49	0	0.02	73	24	0.324	6.06886
Aplan-CEM-ATC25-C1_vs_Aplan-CEM-PreTreatment	chr10	24513369	24513369	C	G	KIAA1217	c.2112C>G	p.Arg704Arg	synonymous_variant	LOW	48	0	0.026	60	17	0.275	4.71844
Aplan-CEM-ATC25-C1_vs_Aplan-CEM-PreTreatment	chr10	25175496	25175496	C	T	GPR158	c.76C>T	p.Arg26Cys	missense_variant	MODERATE	28	0	0.037	34	8	0.233	2.20141
Aplan-CEM-ATC25-C1_vs_Aplan-CEM-PreTreatment	chr10	26501110	26501110	A	G	APBB1IP	c.452A>G	p.Gln151Arg	missense_variant&splice_region_variant	MODERATE	68	0	0.016	80	41	0.493	5.91337
Aplan-CEM-ATC25-C1_vs_Aplan-CEM-PreTreatment	chr10	27035717	27035717	C	G	ANKRD26	c.2781G>C	p.Ser927Ser	synonymous_variant	LOW	27	0	0.036	44	14	0.316	3.25994
Aplan-CEM-ATC25-C1_vs_Aplan-CEM-PreTreatment	chr10	34331150	34331150	C	G	PARD3	c.2809G>C	p.Ala937Pro	missense_variant	MODERATE	26	0	0.042	52	13	0.279	2.46078
Aplan-CEM-ATC25-C1_vs_Aplan-CEM-PreTreatment	chr10	37142091	37142091	C	T	ANKRD30A	c.1026C>T	p.Pro342Pro	synonymous_variant	LOW	115	0	0.009745	170	34	0.207	5.95946
Aplan-CEM-ATC25-C1_vs_Aplan-CEM-PreTreatment	chr10	43102389	43102389	C	G	RET	c.385C>G	p.Pro129Ala	missense_variant	MODERATE	45	0	0.023	62	16	0.28	4.16671
Aplan-CEM-ATC25-C1_vs_Aplan-CEM-PreTreatment	chr10	48897513	48897513	C	T	WDFY4	c.1634C>T	p.Ser545Leu	missense_variant	MODERATE	42	0	0.026	86	24	0.298	4.62721
Aplan-CEM-ATC25-C1_vs_Aplan-CEM-PreTreatment	chr10	48897542	48897542	C	T	WDFY4	c.1663C>T	p.Arg555Trp	missense_variant	MODERATE	50	0	0.022	99	29	0.293	5.47062
Aplan-CEM-ATC25-C1_vs_Aplan-CEM-PreTreatment	chr10	48913832	48913832	C	G	LRRC18	c.324G>C	p.Leu108Leu	synonymous_variant	LOW	66	0	0.016	93	27	0.274	6.2704
Aplan-CEM-ATC25-C1_vs_Aplan-CEM-PreTreatment	chr10	49165758	49165758	G	A	C10orf128	c.269+8C>T		splice_region_variant&intron_variant	LOW	21	0	0.054	53	28	0.512	5.15276
Aplan-CEM-ATC25-C1_vs_Aplan-CEM-PreTreatment	chr10	49614392	49614392	C	G	CHAT	c.203C>G	p.Pro68Arg	missense_variant	MODERATE	35	0	0.031	50	19	0.364	5.07018
Aplan-CEM-ATC25-C1_vs_Aplan-CEM-PreTreatment	chr10	49752143	49752143	C	G	OGDHL	c.584G>C	p.Arg195Pro	missense_variant	MODERATE	35	0	0.034	43	9	0.256	2.45849
Aplan-CEM-ATC25-C1_vs_Aplan-CEM-PreTreatment	chr10	56358803	56358803	A	G	ZWINT	c.623+2T>C		splice_donor_variant&intron_variant	HIGH	40	0	0.026	79	15	0.217	2.6463
Aplan-CEM-ATC25-C1_vs_Aplan-CEM-PreTreatment	chr10	59251654	59251654	G	A	FAM13C	c.1618C>T	p.Arg540*	stop_gained	HIGH	25	0	0.046	43	19	0.447	4.43533
Aplan-CEM-ATC25-C1_vs_Aplan-CEM-PreTreatment	chr10	60279115	60279115	C	G	ANK3	c.250G>C	p.Glu84Gln	missense_variant	MODERATE	25	0	0.04	40	13	0.361	3.01886
Aplan-CEM-ATC25-C1_vs_Aplan-CEM-PreTreatment	chr10	66766413	66766413	G	A	CTNNA3	c.1132C>T	p.Arg378Cys	missense_variant	MODERATE	31	0	0.036	32	9	0.241	2.69103
Aplan-CEM-ATC25-C1_vs_Aplan-CEM-PreTreatment	chr10	68493523	68493523	G	A	SLC25A16	c.469C>T	p.Arg157Cys	missense_variant	MODERATE	41	0	0.028	48	25	0.514	6.1587
Aplan-CEM-ATC25-C1_vs_Aplan-CEM-PreTreatment	chr10	69485148	69485148	A	G	TSPAN15	c.290A>G	p.Tyr97Cys	missense_variant	MODERATE	29	0	0.034	49	19	0.4	4.26344
Aplan-CEM-ATC25-C1_vs_Aplan-CEM-PreTreatment	chr10	69930437	69930437	G	A	COL13A1	c.1535G>A	p.Gly512Asp	missense_variant	MODERATE	38	0	0.026	51	32	0.587	5.87198
Aplan-CEM-ATC25-C1_vs_Aplan-CEM-PreTreatment	chr10	70124058	70124058	C	G	AIFM2	c.27G>C	p.Ser9Ser	synonymous_variant	LOW	41	0	0.024	81	20	0.254	3.81226
Aplan-CEM-ATC25-C1_vs_Aplan-CEM-PreTreatment	chr10	70775226	70775226	G	A	TBATA	c.738C>T	p.Ser246Ser	synonymous_variant	LOW	30	0	0.037	50	17	0.36	3.896
Aplan-CEM-ATC25-C1_vs_Aplan-CEM-PreTreatment	chr10	71716132	71716132	C	G	C10orf105	c.206G>C	p.Arg69Pro	missense_variant	MODERATE	70	0	0.016	68	22	0.333	6.1003
Aplan-CEM-ATC25-C1_vs_Aplan-CEM-PreTreatment	chr10	71819732	71819732	G	C	PSAP	c.1183C>G	p.Arg395Gly	missense_variant	MODERATE	38	0	0.025	72	19	0.271	3.85428
Aplan-CEM-ATC25-C1_vs_Aplan-CEM-PreTreatment	chr10	72898895	72898895	G	A	OIT3	c.293G>A	p.Gly98Asp	missense_variant	MODERATE	42	0	0.025	64	33	0.489	6.01586
Aplan-CEM-ATC25-C1_vs_Aplan-CEM-PreTreatment	chr10	73916428	73916428	C	G	PLAU	c.1159C>G	p.Arg387Gly	missense_variant	MODERATE	33	0	0.036	41	9	0.228	2.45361
Aplan-CEM-ATC25-C1_vs_Aplan-CEM-PreTreatment	chr10	74970095	74970095	C	G	KAT6B	c.922C>G	p.Pro308Ala	missense_variant	MODERATE	29	0	0.04	35	10	0.299	2.87154
Aplan-CEM-ATC25-C1_vs_Aplan-CEM-PreTreatment	chr10	74975840	74975840	C	G	KAT6B	c.1503C>G	p.Ser501Ser	synonymous_variant	LOW	74	0	0.014	113	30	0.277	5.94927
Aplan-CEM-ATC25-C1_vs_Aplan-CEM-PreTreatment	chr10	75020790	75020790	C	G	KAT6B	c.2838C>G	p.His946Gln	missense_variant	MODERATE	30	0	0.034	67	16	0.237	2.66284
Aplan-CEM-ATC25-C1_vs_Aplan-CEM-PreTreatment	chr10	75399877	75399877	C	G	ZNF503	c.813G>C	p.Ser271Ser	synonymous_variant	LOW	75	0	0.015	167	46	0.289	6.18624
Aplan-CEM-ATC25-C1_vs_Aplan-CEM-PreTreatment	chr10	79938097	79938097	C	G	SFTPD	c.883G>C	p.Ala295Pro	missense_variant	MODERATE	31	0	0.032	67	17	0.273	2.96938
Aplan-CEM-ATC25-C1_vs_Aplan-CEM-PreTreatment	chr10	85724520	85724520	C	T	GRID1	c.1690G>A	p.Ala564Thr	missense_variant	MODERATE	41	0	0.026	66	13	0.23	2.81452
Aplan-CEM-ATC25-C1_vs_Aplan-CEM-PreTreatment	chr10	86942993	86942993	G	C	MMRN2	c.1791C>G	p.Ala597Ala	synonymous_variant	LOW	58	0	0.018	81	23	0.289	5.61779
Aplan-CEM-ATC25-C1_vs_Aplan-CEM-PreTreatment	chr10	94283808	94283808	G	T	PLCE1	c.4814G>T	p.Arg1605Ile	missense_variant	MODERATE	21	0	0.052	41	18	0.444	3.70232
Aplan-CEM-ATC25-C1_vs_Aplan-CEM-PreTreatment	chr10	94306524	94306524	G	C	PLCE1	c.5720G>C	p.Arg1907Pro	missense_variant	MODERATE	45	0	0.025	70	19	0.296	4.37749
Aplan-CEM-ATC25-C1_vs_Aplan-CEM-PreTreatment	chr10	95037338	95037338	A	G	CYP2C8	c.1292-29T>C		sequence_feature	LOW	31	0	0.036	37	25	0.594	6.98446
Aplan-CEM-ATC25-C1_vs_Aplan-CEM-PreTreatment	chr10	96197005	96197005	A	G	BLNK	c.1154T>C	p.Leu385Pro	missense_variant	MODERATE	31	0	0.036	31	13	0.379	4.30408
Aplan-CEM-ATC25-C1_vs_Aplan-CEM-PreTreatment	chr10	99727066	99727066	C	G	COX15	c.484G>C	p.Val162Leu	missense_variant	MODERATE	38	0	0.03	41	14	0.359	4.44256
Aplan-CEM-ATC25-C1_vs_Aplan-CEM-PreTreatment	chr10	100930995	100930996	AT	A	SLF2	c.2360delT	p.Leu787fs	frameshift_variant	HIGH	20	0	0.047	57	28	0.494	4.62231
Aplan-CEM-ATC25-C1_vs_Aplan-CEM-PreTreatment	chr10	100979981	100979981	C	G	SEMA4G	c.1117C>G	p.Arg373Gly	missense_variant	MODERATE	77	0	0.016	84	19	0.211	5.78352
Aplan-CEM-ATC25-C1_vs_Aplan-CEM-PreTreatment	chr10	101956609	101956609	G	T	C10orf76	c.1693C>A	p.Leu565Ile	missense_variant	MODERATE	55	0	0.021	78	16	0.225	3.75841
Aplan-CEM-ATC25-C1_vs_Aplan-CEM-PreTreatment	chr10	102108147	102108147	A	G	LDB1	c.1182T>C	p.Pro394Pro	synonymous_variant	LOW	32	0	0.037	56	37	0.652	6.50509
Aplan-CEM-ATC25-C1_vs_Aplan-CEM-PreTreatment	chr10	102451047	102451047	G	C	C10orf95	c.47C>G	p.Pro16Arg	missense_variant	MODERATE	93	0	0.012	105	26	0.253	6.16808
Aplan-CEM-ATC25-C1_vs_Aplan-CEM-PreTreatment	chr10	103387299	103387299	C	T	TAF5	c.1954C>T	p.Arg652Trp	missense_variant	MODERATE	82	0	0.014	97	48	0.481	5.83609
Aplan-CEM-ATC25-C1_vs_Aplan-CEM-PreTreatment	chr10	103473533	103473533	C	G	CALHM3	c.715G>C	p.Ala239Pro	missense_variant	MODERATE	55	0	0.018	71	15	0.204	3.92048
Aplan-CEM-ATC25-C1_vs_Aplan-CEM-PreTreatment	chr10	103613161	103613161	G	A	SH3PXD2A	c.950C>T	p.Ala317Val	missense_variant	MODERATE	28	0	0.041	28	14	0.539	4.85943
Aplan-CEM-ATC25-C1_vs_Aplan-CEM-PreTreatment	chr10	110596435	110596435	T	G	SMC3	c.2001T>G	p.Gly667Gly	synonymous_variant	LOW	32	0	0.033	41	17	0.429	4.99991
Aplan-CEM-ATC25-C1_vs_Aplan-CEM-PreTreatment	chr10	111009799	111009799	G	A	SHOC2	c.1509G>A	p.Glu503Glu	synonymous_variant	LOW	22	0	0.05	40	11	0.294	2.27051
Aplan-CEM-ATC25-C1_vs_Aplan-CEM-PreTreatment	chr10	113663877	113663877	A	T	NRAP	c.6T>A	p.Asn2Lys	missense_variant	MODERATE	21	0	0.05	23	8	0.4	2.40731
Aplan-CEM-ATC25-C1_vs_Aplan-CEM-PreTreatment	chr10	114285996	114285996	C	G	VWA2	c.1055C>G	p.Ala352Gly	missense_variant	MODERATE	62	0	0.019	72	17	0.234	4.99433
Aplan-CEM-ATC25-C1_vs_Aplan-CEM-PreTreatment	chr10	116855717	116855717	T	G	ENO4	c.263T>G	p.Val88Gly	missense_variant	MODERATE	52	0	0.023	61	13	0.214	3.72685
Aplan-CEM-ATC25-C1_vs_Aplan-CEM-PreTreatment	chr10	121974928	121974928	C	G	NSMCE4A	c.238G>C	p.Gly80Arg	missense_variant	MODERATE	46	0	0.023	43	9	0.238	3.05198
Aplan-CEM-ATC25-C1_vs_Aplan-CEM-PreTreatment	chr10	122087610	122087610	G	A	TACC2	c.5110G>A	p.Glu1704Lys	missense_variant	MODERATE	56	0	0.02	86	43	0.512	6.22965
Aplan-CEM-ATC25-C1_vs_Aplan-CEM-PreTreatment	chr10	122427021	122427021	C	T	PLEKHA1	c.890C>T	p.Ser297Phe	missense_variant	MODERATE	28	0	0.039	42	20	0.5	5.32164
Aplan-CEM-ATC25-C1_vs_Aplan-CEM-PreTreatment	chr10	124983209	124983209	T	C	ZRANB1	c.1583T>C	p.Val528Ala	missense_variant	MODERATE	53	0	0.022	56	26	0.521	6.07957
Aplan-CEM-ATC25-C1_vs_Aplan-CEM-PreTreatment	chr10	125026398	125026398	C	G	CTBP2	c.1362G>C	p.Thr454Thr	synonymous_variant	LOW	105	0	0.011	111	26	0.25	6.01938
Aplan-CEM-ATC25-C1_vs_Aplan-CEM-PreTreatment	chr10	125723914	125723914	A	G	EDRF1	c.488A>G	p.Glu163Gly	missense_variant	MODERATE	30	0	0.036	54	18	0.34	3.81091
Aplan-CEM-ATC25-C1_vs_Aplan-CEM-PreTreatment	chr10	125807424	125807424	T	C	UROS	c.383A>G	p.Tyr128Cys	missense_variant	MODERATE	22	0	0.05	33	12	0.385	2.78476
Aplan-CEM-ATC25-C1_vs_Aplan-CEM-PreTreatment	chr10	125823604	125823604	A	C	BCCIP	c.47A>C	p.Gln16Pro	missense_variant	MODERATE	46	0	0.024	55	14	0.269	4.04796
Aplan-CEM-ATC25-C1_vs_Aplan-CEM-PreTreatment	chr10	126004934	126004934	G	C	FANK1	c.590G>C	p.Arg197Pro	missense_variant	MODERATE	50	0	0.023	54	14	0.283	4.27894
Aplan-CEM-ATC25-C1_vs_Aplan-CEM-PreTreatment	chr10	126504951	126504951	G	A	C10orf90	c.249C>T	p.His83His	synonymous_variant	LOW	65	0	0.017	108	23	0.223	4.99301
Aplan-CEM-ATC25-C1_vs_Aplan-CEM-PreTreatment	chr10	128073381	128073381	G	T	PTPRE	c.1509G>T	p.Leu503Leu	synonymous_variant	LOW	48	0	0.024	60	28	0.458	6.45767
Aplan-CEM-ATC25-C1_vs_Aplan-CEM-PreTreatment	chr10	132857783	132857783	C	G	CFAP46	c.5381G>C	p.Arg1794Pro	missense_variant	MODERATE	36	0	0.03	38	11	0.277	3.36489
Aplan-CEM-ATC25-C1_vs_Aplan-CEM-PreTreatment	chr10	133071044	133071044	C	A	ADGRA1	c.116C>A	p.Pro39Gln	missense_variant	MODERATE	47	0	0.026	73	32	0.477	6.48222
Aplan-CEM-ATC25-C1_vs_Aplan-CEM-PreTreatment	chr11	299393	299393	G	C	IFITM5	c.98C>G	p.Pro33Arg	missense_variant	MODERATE	37	0	0.032	81	28	0.349	5.03151
Aplan-CEM-ATC25-C1_vs_Aplan-CEM-PreTreatment	chr11	299397	299397	G	C	IFITM5	c.94C>G	p.Pro32Ala	missense_variant	MODERATE	37	0	0.031	79	27	0.339	5.09135
Aplan-CEM-ATC25-C1_vs_Aplan-CEM-PreTreatment	chr11	320561	320561	G	C	IFITM3	c.249+4C>G	p.R85G	splice_region_variant&intron_variant	LOW	91	0	0.012	123	36	0.308	6.26931
Aplan-CEM-ATC25-C1_vs_Aplan-CEM-PreTreatment	chr11	376089	376089	G	A	B4GALNT4	c.1111G>A	p.Val371Ile	missense_variant	MODERATE	28	0	0.033	52	23	0.449	5.24463
Aplan-CEM-ATC25-C1_vs_Aplan-CEM-PreTreatment	chr11	394392	394392	G	C	PKP3	c.100G>C	p.Glu34Gln	missense_variant	MODERATE	30	0	0.033	52	13	0.255	2.79692
Aplan-CEM-ATC25-C1_vs_Aplan-CEM-PreTreatment	chr11	433359	433359	G	C	ANO9	c.305C>G	p.Pro102Arg	missense_variant	MODERATE	76	0	0.015	103	32	0.311	5.69078
Aplan-CEM-ATC25-C1_vs_Aplan-CEM-PreTreatment	chr11	801566	801567	GG	AA	PIDD1	c.1360_1361delCCinsTT	p.Pro454Phe	missense_variant	MODERATE	41	0	0.027	59	14	0.26	3.48774
Aplan-CEM-ATC25-C1_vs_Aplan-CEM-PreTreatment	chr11	836758	836758	G	GC	CD151	c.277-3dupC		splice_acceptor_variant&intron_variant	HIGH	37	1	0.061	38	19	0.529	5.59756
Aplan-CEM-ATC25-C1_vs_Aplan-CEM-PreTreatment	chr11	1232069	1232069	C	G	MUC5B	c.1752C>G	p.Gly584Gly	synonymous_variant	LOW	43	0	0.027	102	27	0.322	4.48646
Aplan-CEM-ATC25-C1_vs_Aplan-CEM-PreTreatment	chr11	1234550	1234550	G	A	MUC5B	c.2500G>A	p.Gly834Ser	missense_variant	MODERATE	68	0	0.018	76	16	0.224	4.74764
Aplan-CEM-ATC25-C1_vs_Aplan-CEM-PreTreatment	chr11	1235099	1235099	G	C	MUC5B	c.2645G>C	p.Arg882Pro	missense_variant	MODERATE	49	0	0.022	98	23	0.241	4.29681
Aplan-CEM-ATC25-C1_vs_Aplan-CEM-PreTreatment	chr11	1240864	1240864	G	A	MUC5B	c.3984G>A	p.Pro1328Pro	synonymous_variant	LOW	36	0	0.029	50	18	0.364	4.74505
Aplan-CEM-ATC25-C1_vs_Aplan-CEM-PreTreatment	chr11	1241028	1241028	C	G	MUC5B	c.4148C>G	p.Ala1383Gly	missense_variant	MODERATE	77	0	0.015	103	23	0.209	5.94273
Aplan-CEM-ATC25-C1_vs_Aplan-CEM-PreTreatment	chr11	1248015	1248015	C	G	MUC5B	c.11135C>G	p.Pro3712Arg	missense_variant	MODERATE	238	0	0.004716	464	229	0.497	5.5879
Aplan-CEM-ATC25-C1_vs_Aplan-CEM-PreTreatment	chr11	1248016	1248016	G	A	MUC5B	c.11136G>A	p.Pro3712Pro	synonymous_variant	LOW	235	0	0.004748	461	106	0.226	5.70461
Aplan-CEM-ATC25-C1_vs_Aplan-CEM-PreTreatment	chr11	1248604	1248604	C	G	MUC5B	c.11724C>G	p.Ser3908Ser	synonymous_variant	LOW	346	0	0.003139	585	153	0.263	5.80923
Aplan-CEM-ATC25-C1_vs_Aplan-CEM-PreTreatment	chr11	1251219	1251219	C	G	MUC5B	c.14339C>G	p.Thr4780Ser	missense_variant	MODERATE	124	0	0.008278	209	55	0.271	5.95101
Aplan-CEM-ATC25-C1_vs_Aplan-CEM-PreTreatment	chr11	1837392	1837392	G	A	SYT8	c.1167G>A	p.Gln389Gln	synonymous_variant	LOW	89	0	0.013	118	67	0.539	5.629
Aplan-CEM-ATC25-C1_vs_Aplan-CEM-PreTreatment	chr11	1933938	1933938	G	A	TNNT3	c.329G>A	p.Arg110His	missense_variant	MODERATE	29	0	0.034	53	21	0.391	4.53991
Aplan-CEM-ATC25-C1_vs_Aplan-CEM-PreTreatment	chr11	3660061	3660061	T	C	ART1	c.542T>C	p.Val181Ala	missense_variant	MODERATE	81	0	0.014	144	69	0.508	6.0136
Aplan-CEM-ATC25-C1_vs_Aplan-CEM-PreTreatment	chr11	3823937	3823937	C	G	PGAP2	c.403C>G	p.Arg135Gly	missense_variant	MODERATE	43	0	0.024	71	21	0.303	4.63674
Aplan-CEM-ATC25-C1_vs_Aplan-CEM-PreTreatment	chr11	3828027	3828027	C	G	RHOG	c.112G>C	p.Asp38His	missense_variant	MODERATE	64	0	0.017	90	33	0.344	6.11614
Aplan-CEM-ATC25-C1_vs_Aplan-CEM-PreTreatment	chr11	3856382	3856382	G	C	STIM1	c.112G>C	p.Ala38Pro	missense_variant	MODERATE	55	0	0.02	74	17	0.218	4.44852
Aplan-CEM-ATC25-C1_vs_Aplan-CEM-PreTreatment	chr11	6210117	6210117	C	G	C11orf42	c.340C>G	p.Arg114Gly	missense_variant	MODERATE	72	0	0.015	97	27	0.276	5.97309
Aplan-CEM-ATC25-C1_vs_Aplan-CEM-PreTreatment	chr11	6270321	6270321	C	G	CCKBR	c.637C>G	p.Arg213Gly	missense_variant	MODERATE	46	0	0.026	72	21	0.29	5.00061
Aplan-CEM-ATC25-C1_vs_Aplan-CEM-PreTreatment	chr11	6392114	6392114	C	G	SMPD1	c.1049C>G	p.Ala350Gly	missense_variant	MODERATE	41	1	0.028	68	18	0.283	2.91116
Aplan-CEM-ATC25-C1_vs_Aplan-CEM-PreTreatment	chr11	6392146	6392146	C	G	SMPD1	c.1081C>G	p.Arg361Gly	missense_variant	MODERATE	41	0	0.026	63	13	0.214	2.85317
Aplan-CEM-ATC25-C1_vs_Aplan-CEM-PreTreatment	chr11	6394424	6394424	C	T	SMPD1	c.1713C>T	p.Thr571Thr	synonymous_variant	LOW	38	0	0.028	65	13	0.224	2.74839
Aplan-CEM-ATC25-C1_vs_Aplan-CEM-PreTreatment	chr11	6546229	6546229	G	GC	DNHD1	c.5294dupC	p.Leu1766fs	frameshift_variant	HIGH	74	0	0.014	103	32	0.321	6.13693
Aplan-CEM-ATC25-C1_vs_Aplan-CEM-PreTreatment	chr11	6571760	6571760	G	A	DNHD1	c.14036G>A	p.Ser4679Asn	missense_variant	MODERATE	93	0	0.013	86	52	0.581	5.97296
Aplan-CEM-ATC25-C1_vs_Aplan-CEM-PreTreatment	chr11	6892385	6892385	A	C	OR2D2	c.116T>G	p.Val39Gly	missense_variant	MODERATE	54	0	0.02	70	20	0.258	5.53575
Aplan-CEM-ATC25-C1_vs_Aplan-CEM-PreTreatment	chr11	8640591	8640591	T	C	TRIM66	c.1343A>G	p.Gln448Arg	missense_variant	MODERATE	70	0	0.016	79	16	0.211	4.70674
Aplan-CEM-ATC25-C1_vs_Aplan-CEM-PreTreatment	chr11	9165964	9165964	A	G	DENND5A	c.2155T>C	p.Tyr719His	missense_variant	MODERATE	30	0	0.033	39	13	0.382	3.52212
Aplan-CEM-ATC25-C1_vs_Aplan-CEM-PreTreatment	chr11	10306543	10306543	C	G	ADM	c.460C>G	p.Leu154Val	missense_variant	MODERATE	34	0	0.031	47	13	0.285	3.35078
Aplan-CEM-ATC25-C1_vs_Aplan-CEM-PreTreatment	chr11	11948534	11948534	C	G	USP47	c.3384C>G	p.Tyr1128*	stop_gained	HIGH	36	0	0.037	43	15	0.305	4.53554
Aplan-CEM-ATC25-C1_vs_Aplan-CEM-PreTreatment	chr11	12294134	12294134	G	C	MICALCL	c.703G>C	p.Ala235Pro	missense_variant	MODERATE	84	0	0.013	114	34	0.333	6.22814
Aplan-CEM-ATC25-C1_vs_Aplan-CEM-PreTreatment	chr11	14645055	14645055	T	A	PDE3B	c.978+2T>A		splice_donor_variant&intron_variant	HIGH	47	0	0.025	44	9	0.221	3.04358
Aplan-CEM-ATC25-C1_vs_Aplan-CEM-PreTreatment	chr11	17558577	17558577	T	C	OTOG	c.1072T>C	p.Phe358Leu	missense_variant	MODERATE	34	0	0.03	76	21	0.29	3.74902
Aplan-CEM-ATC25-C1_vs_Aplan-CEM-PreTreatment	chr11	17559122	17559122	C	T	OTOG	c.1210C>T	p.Arg404Trp	missense_variant	MODERATE	30	0	0.038	38	11	0.302	2.80541
Aplan-CEM-ATC25-C1_vs_Aplan-CEM-PreTreatment	chr11	17988712	17988712	T	C	SERGEF	c.729A>G	p.Gln243Gln	synonymous_variant	LOW	24	0	0.048	60	20	0.345	3.30973
Aplan-CEM-ATC25-C1_vs_Aplan-CEM-PreTreatment	chr11	18173676	18173676	G	A	MRGPRX4	c.420G>A	p.Ala140Ala	synonymous_variant	LOW	115	0	0.00971	191	43	0.221	6.04757
Aplan-CEM-ATC25-C1_vs_Aplan-CEM-PreTreatment	chr11	18615625	18615626	GT	G	SPTY2D1	c.648delA	p.Lys216fs	frameshift_variant	HIGH	79	0	0.013	131	42	0.323	5.77803
Aplan-CEM-ATC25-C1_vs_Aplan-CEM-PreTreatment	chr11	20159985	20159985	C	G	DBX1	c.340G>C	p.Ala114Pro	missense_variant	MODERATE	53	0	0.023	68	15	0.227	3.94467
Aplan-CEM-ATC25-C1_vs_Aplan-CEM-PreTreatment	chr11	20601297	20601297	G	C	SLC6A5	c.172G>C	p.Gly58Arg	missense_variant	MODERATE	23	0	0.045	59	15	0.259	2.07895
Aplan-CEM-ATC25-C1_vs_Aplan-CEM-PreTreatment	chr11	31801586	31801587	AC	A	PAX6	c.373delG	p.Val125fs	frameshift_variant	HIGH	49	0	0.021	74	22	0.308	5.36474
Aplan-CEM-ATC25-C1_vs_Aplan-CEM-PreTreatment	chr11	32091414	32091414	A	G	RCN1	c.218A>G	p.Asp73Gly	missense_variant	MODERATE	56	0	0.02	58	28	0.471	6.19648
Aplan-CEM-ATC25-C1_vs_Aplan-CEM-PreTreatment	chr11	33328603	33328603	G	A	HIPK3	c.1191G>A	p.Pro397Pro	synonymous_variant	LOW	40	0	0.028	50	23	0.452	6.75876
Aplan-CEM-ATC25-C1_vs_Aplan-CEM-PreTreatment	chr11	34082833	34082833	C	G	CAPRIN1	c.835C>G	p.Pro279Ala	missense_variant	MODERATE	23	0	0.048	40	13	0.382	2.63167
Aplan-CEM-ATC25-C1_vs_Aplan-CEM-PreTreatment	chr11	34143434	34143435	CT	C	NAT10	c.2886-3delT		splice_region_variant&intron_variant	LOW	19	0	0.048	34	20	0.565	4.90532
Aplan-CEM-ATC25-C1_vs_Aplan-CEM-PreTreatment	chr11	34173289	34173289	C	G	ABTB2	c.1263G>C	p.Pro421Pro	synonymous_variant	LOW	45	0	0.024	60	19	0.32	4.95153
Aplan-CEM-ATC25-C1_vs_Aplan-CEM-PreTreatment	chr11	45226636	45226636	G	A	PRDM11	c.2011G>A	p.Ala671Thr	missense_variant	MODERATE	65	0	0.016	142	60	0.416	5.931
Aplan-CEM-ATC25-C1_vs_Aplan-CEM-PreTreatment	chr11	45252648	45252648	C	G	SYT13	c.619G>C	p.Glu207Gln	missense_variant	MODERATE	53	0	0.024	81	22	0.25	5.27178
Aplan-CEM-ATC25-C1_vs_Aplan-CEM-PreTreatment	chr11	45650495	45650495	C	G	CHST1	c.429G>C	p.Pro143Pro	synonymous_variant	LOW	59	0	0.018	119	39	0.322	5.82647
Aplan-CEM-ATC25-C1_vs_Aplan-CEM-PreTreatment	chr11	45870523	45870523	C	G	CRY2	c.1603C>G	p.Arg535Gly	missense_variant	MODERATE	53	0	0.021	82	21	0.264	4.92749
Aplan-CEM-ATC25-C1_vs_Aplan-CEM-PreTreatment	chr11	45927466	45927466	T	C	LARGE2	c.1477T>C	p.Tyr493His	missense_variant	MODERATE	50	0	0.02	67	16	0.258	4.19679
Aplan-CEM-ATC25-C1_vs_Aplan-CEM-PreTreatment	chr11	46372631	46372631	G	A	DGKZ	c.1589G>A	p.Arg530His	missense_variant	MODERATE	75	0	0.015	79	34	0.44	5.89051
Aplan-CEM-ATC25-C1_vs_Aplan-CEM-PreTreatment	chr11	47182475	47182475	C	G	PACSIN3	c.139G>C	p.Ala47Pro	missense_variant	MODERATE	53	0	0.022	76	18	0.238	4.41342
Aplan-CEM-ATC25-C1_vs_Aplan-CEM-PreTreatment	chr11	47413478	47413478	G	C	SLC39A13	c.616G>C	p.Gly206Arg	missense_variant	MODERATE	49	0	0.024	69	19	0.276	4.82097
Aplan-CEM-ATC25-C1_vs_Aplan-CEM-PreTreatment	chr11	55651429	55651429	T	A	OR4S2	c.526T>A	p.Phe176Ile	missense_variant	MODERATE	17	0	0.058	34	22	0.618	5.43633
Aplan-CEM-ATC25-C1_vs_Aplan-CEM-PreTreatment	chr11	55885837	55885837	C	G	TRIM51	c.409C>G	p.Arg137Gly	missense_variant&splice_region_variant	MODERATE	87	0	0.013	115	32	0.271	5.93339
Aplan-CEM-ATC25-C1_vs_Aplan-CEM-PreTreatment	chr11	55914214	55914214	G	T	OR5W2	c.369C>A	p.Tyr123*	stop_gained	HIGH	34	0	0.032	58	24	0.415	5.56604
Aplan-CEM-ATC25-C1_vs_Aplan-CEM-PreTreatment	chr11	57309461	57309461	G	A	TNKS1BP1	c.3250C>T	p.Arg1084*	stop_gained	HIGH	82	0	0.013	122	58	0.49	5.89416
Aplan-CEM-ATC25-C1_vs_Aplan-CEM-PreTreatment	chr11	57476591	57476591	C	G	RTN4RL2	c.943C>G	p.Pro315Ala	missense_variant	MODERATE	43	0	0.024	62	15	0.25	3.52223
Aplan-CEM-ATC25-C1_vs_Aplan-CEM-PreTreatment	chr11	57796985	57796985	C	G	CTNND1	c.949C>G	p.Arg317Gly	missense_variant	MODERATE	47	0	0.024	67	21	0.333	5.47005
Aplan-CEM-ATC25-C1_vs_Aplan-CEM-PreTreatment	chr11	58507738	58507738	G	C	OR5B21	c.368C>G	p.Ala123Gly	missense_variant	MODERATE	54	0	0.021	88	23	0.263	5.14627
Aplan-CEM-ATC25-C1_vs_Aplan-CEM-PreTreatment	chr11	60873702	60873702	C	T	ZP1	c.1499C>T	p.Ser500Leu	missense_variant	MODERATE	77	1	0.029	102	40	0.386	6.29056
Aplan-CEM-ATC25-C1_vs_Aplan-CEM-PreTreatment	chr11	61007741	61007741	G	C	CD6	c.300G>C	p.Pro100Pro	synonymous_variant	LOW	43	0	0.026	62	16	0.226	3.86098
Aplan-CEM-ATC25-C1_vs_Aplan-CEM-PreTreatment	chr11	61011140	61011140	G	C	CD6	c.1150+5G>C		splice_region_variant&intron_variant	LOW	27	0	0.043	48	14	0.301	2.88632
Aplan-CEM-ATC25-C1_vs_Aplan-CEM-PreTreatment	chr11	61300825	61300825	A	G	DDB1	c.3323T>C	p.V1108A	structural_interaction_variant	HIGH	84	0	0.014	86	20	0.229	6.25492
Aplan-CEM-ATC25-C1_vs_Aplan-CEM-PreTreatment	chr11	61339169	61339169	C	G	TKFC	c.297C>G	p.Ala99Ala	synonymous_variant	LOW	49	0	0.024	63	11	0.231	2.65453
Aplan-CEM-ATC25-C1_vs_Aplan-CEM-PreTreatment	chr11	61368635	61368635	G	A	TMEM138	c.415G>A	p.Val139Ile	missense_variant	MODERATE	24	0	0.047	25	15	0.584	5.53693
Aplan-CEM-ATC25-C1_vs_Aplan-CEM-PreTreatment	chr11	61828462	61828462	G	C	FADS2	c.72G>C	p.Glu24Asp	missense_variant	MODERATE	86	0	0.013	94	22	0.226	6.1297
Aplan-CEM-ATC25-C1_vs_Aplan-CEM-PreTreatment	chr11	62559697	62559697	C	T	EEF1G	c.1296G>A	p.Gln432Gln	synonymous_variant	LOW	65	0	0.017	78	29	0.406	5.8384
Aplan-CEM-ATC25-C1_vs_Aplan-CEM-PreTreatment	chr11	62594567	62594567	C	A	MTA2	c.1641G>T	p.Leu547Leu	synonymous_variant	LOW	35	0	0.029	51	16	0.298	3.97235
Aplan-CEM-ATC25-C1_vs_Aplan-CEM-PreTreatment	chr11	62596797	62596797	T	C	MTA2	c.722A>G	p.Asn241Ser	missense_variant	MODERATE	66	0	0.017	76	26	0.328	6.43785
Aplan-CEM-ATC25-C1_vs_Aplan-CEM-PreTreatment	chr11	62735465	62735465	G	C	TTC9C	c.322G>C	p.Ala108Pro	missense_variant	MODERATE	55	0	0.02	76	13	0.209	3.18997
Aplan-CEM-ATC25-C1_vs_Aplan-CEM-PreTreatment	chr11	62753612	62753612	C	G	ZBTB3	c.203G>C	p.Arg68Pro	missense_variant	MODERATE	95	0	0.012	134	34	0.265	5.99097
Aplan-CEM-ATC25-C1_vs_Aplan-CEM-PreTreatment	chr11	62789314	62789314	G	C	TMEM179B	c.307G>C	p.Ala103Pro	missense_variant	MODERATE	71	0	0.015	100	21	0.204	5.23165
Aplan-CEM-ATC25-C1_vs_Aplan-CEM-PreTreatment	chr11	62789433	62789433	G	C	TMEM179B	c.419+7G>C		splice_region_variant&intron_variant	LOW	68	0	0.017	79	21	0.267	6.0039
Aplan-CEM-ATC25-C1_vs_Aplan-CEM-PreTreatment	chr11	62791828	62791828	C	G	TMEM223	c.167G>C	p.Gly56Ala	missense_variant	MODERATE	65	0	0.018	77	16	0.232	4.57895
Aplan-CEM-ATC25-C1_vs_Aplan-CEM-PreTreatment	chr11	62791965	62791965	C	G	TMEM223	c.30G>C	p.Thr10Thr	synonymous_variant	LOW	49	0	0.02	43	10	0.268	3.57528
Aplan-CEM-ATC25-C1_vs_Aplan-CEM-PreTreatment	chr11	62794968	62794968	C	G	NXF1	c.1544G>C	p.R515P	structural_interaction_variant	HIGH	25	0	0.04	56	17	0.302	3.02991
Aplan-CEM-ATC25-C1_vs_Aplan-CEM-PreTreatment	chr11	62803523	62803523	G	C	NXF1	c.265C>G	p.Arg89Gly	missense_variant	MODERATE	39	0	0.028	62	13	0.215	2.84251
Aplan-CEM-ATC25-C1_vs_Aplan-CEM-PreTreatment	chr11	63134714	63134714	T	C	SLC22A24	c.457A>G	p.Met153Val	missense_variant	MODERATE	16	0	0.071	32	13	0.345	2.69509
Aplan-CEM-ATC25-C1_vs_Aplan-CEM-PreTreatment	chr11	63508894	63508894	G	C	LGALS12	c.344G>C	p.Gly115Ala	missense_variant	MODERATE	42	0	0.025	66	15	0.207	3.42821
Aplan-CEM-ATC25-C1_vs_Aplan-CEM-PreTreatment	chr11	63558537	63558537	T	C	HRASLS2	c.242A>G	p.Asp81Gly	missense_variant	MODERATE	62	0	0.019	70	18	0.258	5.43803
Aplan-CEM-ATC25-C1_vs_Aplan-CEM-PreTreatment	chr11	63765186	63765186	G	A	C11orf95	c.706C>T	p.Arg236Cys	missense_variant	MODERATE	51	0	0.021	79	20	0.246	4.63154
Aplan-CEM-ATC25-C1_vs_Aplan-CEM-PreTreatment	chr11	63912897	63912897	G	A	RCOR2	c.942C>T	p.Gly314Gly	synonymous_variant	LOW	27	0	0.034	37	11	0.363	2.79939
Aplan-CEM-ATC25-C1_vs_Aplan-CEM-PreTreatment	chr11	63999037	63999037	C	G	MACROD1	c.892-1G>C		splice_acceptor_variant&intron_variant	HIGH	38	0	0.026	52	19	0.333	5.09158
Aplan-CEM-ATC25-C1_vs_Aplan-CEM-PreTreatment	chr11	64197303	64197303	C	T	STIP1	c.846C>T	p.Ala282Ala	synonymous_variant	LOW	63	0	0.018	84	43	0.541	5.98594
Aplan-CEM-ATC25-C1_vs_Aplan-CEM-PreTreatment	chr11	64235899	64235899	G	C	VEGFB	c.190G>C	p.Val64Leu	missense_variant	MODERATE	58	0	0.021	86	21	0.267	4.92146
Aplan-CEM-ATC25-C1_vs_Aplan-CEM-PreTreatment	chr11	64297463	64297463	G	A	KCNK4-TEX40	n.616-4G>A		splice_region_variant&intron_variant	LOW	49	0	0.022	64	14	0.229	3.62296
Aplan-CEM-ATC25-C1_vs_Aplan-CEM-PreTreatment	chr11	64349598	64349598	C	G	CCDC88B	c.2792C>G	p.Ala931Gly	missense_variant	MODERATE	69	0	0.016	100	22	0.239	5.15438
Aplan-CEM-ATC25-C1_vs_Aplan-CEM-PreTreatment	chr11	64353214	64353214	G	C	CCDC88B	c.3661G>C	p.Ala1221Pro	missense_variant	MODERATE	80	0	0.014	139	36	0.273	6.19503
Aplan-CEM-ATC25-C1_vs_Aplan-CEM-PreTreatment	chr11	64740165	64740166	TG	T	RASGRP2	c.372-3delC		splice_region_variant&intron_variant	LOW	61	0	0.019	76	16	0.225	4.25661
Aplan-CEM-ATC25-C1_vs_Aplan-CEM-PreTreatment	chr11	64838858	64838858	G	C	CDC42BPG	c.921C>G	p.Ser307Arg	missense_variant	MODERATE	37	0	0.026	60	18	0.3	4.12162
Aplan-CEM-ATC25-C1_vs_Aplan-CEM-PreTreatment	chr11	64854474	64854474	G	C	EHD1	c.1506C>G	p.Ala502Ala	synonymous_variant	LOW	118	0	0.009525	169	39	0.236	5.94189
Aplan-CEM-ATC25-C1_vs_Aplan-CEM-PreTreatment	chr11	65214258	65214258	G	GA	SLC22A20	n.414+7dupA		splice_region_variant&intron_variant	LOW	71	0	0.015	109	56	0.505	5.87899
Aplan-CEM-ATC25-C1_vs_Aplan-CEM-PreTreatment	chr11	65526193	65526193	G	C	SCYL1	c.445G>C	p.Val149Leu	missense_variant	MODERATE	83	0	0.014	78	18	0.222	6.16049
Aplan-CEM-ATC25-C1_vs_Aplan-CEM-PreTreatment	chr11	65526206	65526206	G	C	SCYL1	c.458G>C	p.Gly153Ala	missense_variant	MODERATE	84	0	0.014	72	14	0.203	5.02694
Aplan-CEM-ATC25-C1_vs_Aplan-CEM-PreTreatment	chr11	65540032	65540032	C	G	LTBP3	c.3366G>C	p.Gln1122His	missense_variant	MODERATE	64	0	0.017	96	26	0.281	6.07432
Aplan-CEM-ATC25-C1_vs_Aplan-CEM-PreTreatment	chr11	65546811	65546812	GC	G	LTBP3	c.2216delG	p.Gly739fs	frameshift_variant	HIGH	41	0	0.023	54	15	0.274	4.01672
Aplan-CEM-ATC25-C1_vs_Aplan-CEM-PreTreatment	chr11	65583669	65583669	G	A	EHBP1L1	c.2997G>A	p.Leu999Leu	synonymous_variant	LOW	100	0	0.011	154	42	0.268	5.89744
Aplan-CEM-ATC25-C1_vs_Aplan-CEM-PreTreatment	chr11	65618651	65618651	T	C	PCNX3	c.1289T>C	p.Leu430Pro	missense_variant	MODERATE	74	0	0.015	107	22	0.21	5.1124
Aplan-CEM-ATC25-C1_vs_Aplan-CEM-PreTreatment	chr11	65635607	65635607	C	T	PCNX3	c.5263C>T	p.Arg1755Cys	missense_variant	MODERATE	67	0	0.016	79	28	0.391	6.59067
Aplan-CEM-ATC25-C1_vs_Aplan-CEM-PreTreatment	chr11	65850467	65850467	G	A	SNX32	c.411G>A	p.Met137Ile	missense_variant	MODERATE	94	0	0.012	96	22	0.258	6.90459
Aplan-CEM-ATC25-C1_vs_Aplan-CEM-PreTreatment	chr11	65870182	65870182	G	A	EFEMP2	c.546C>T	p.Gly182Gly	synonymous_variant	LOW	53	0	0.02	62	12	0.205	3.40498
Aplan-CEM-ATC25-C1_vs_Aplan-CEM-PreTreatment	chr11	65870197	65870197	G	C	EFEMP2	c.531C>G	p.Cys177Trp	missense_variant	MODERATE	52	0	0.02	55	11	0.211	3.23574
Aplan-CEM-ATC25-C1_vs_Aplan-CEM-PreTreatment	chr11	65892893	65892893	G	C	FOSL1	c.809C>G	p.Ala270Gly	missense_variant	MODERATE	36	0	0.03	63	16	0.254	3.38496
Aplan-CEM-ATC25-C1_vs_Aplan-CEM-PreTreatment	chr11	65920641	65920641	C	T	DRAP1	c.423C>T	p.Ser141Ser	synonymous_variant	LOW	68	0	0.015	123	33	0.287	6.45725
Aplan-CEM-ATC25-C1_vs_Aplan-CEM-PreTreatment	chr11	65947267	65947267	C	G	TSGA10IP	c.442C>G	p.Arg148Gly	missense_variant	MODERATE	84	0	0.014	98	26	0.287	6.1654
Aplan-CEM-ATC25-C1_vs_Aplan-CEM-PreTreatment	chr11	65947691	65947691	A	G	TSGA10IP	c.866A>G	p.Gln289Arg	missense_variant	MODERATE	92	0	0.012	120	58	0.482	5.68993
Aplan-CEM-ATC25-C1_vs_Aplan-CEM-PreTreatment	chr11	65959255	65959255	G	C	TSGA10IP	c.1488G>C	p.Glu496Asp	missense_variant	MODERATE	67	0	0.017	92	31	0.329	6.57371
Aplan-CEM-ATC25-C1_vs_Aplan-CEM-PreTreatment	chr11	65966505	65966505	G	A	SART1	c.1137G>A	p.Leu379Leu	synonymous_variant	LOW	72	0	0.016	98	23	0.234	5.94259
Aplan-CEM-ATC25-C1_vs_Aplan-CEM-PreTreatment	chr11	65977851	65977851	T	A	SART1	c.2124T>A	p.Val708Val	synonymous_variant	LOW	57	0	0.02	64	13	0.251	3.79909
Aplan-CEM-ATC25-C1_vs_Aplan-CEM-PreTreatment	chr11	66261804	66261804	G	C	KLC2	c.291G>C	p.Ala97Ala	synonymous_variant	LOW	34	0	0.033	47	19	0.432	5.19789
Aplan-CEM-ATC25-C1_vs_Aplan-CEM-PreTreatment	chr11	66264412	66264412	G	C	KLC2	c.1184G>C	p.R395P	structural_interaction_variant	HIGH	38	0	0.029	39	11	0.305	3.36559
Aplan-CEM-ATC25-C1_vs_Aplan-CEM-PreTreatment	chr11	66346736	66346736	C	G	B4GAT1	c.810G>C	p.Met270Ile	missense_variant	MODERATE	70	0	0.015	101	31	0.281	5.96448
Aplan-CEM-ATC25-C1_vs_Aplan-CEM-PreTreatment	chr11	66371563	66371563	C	T	SLC29A2	c.29G>A	p.Ser10Asn	missense_variant&splice_region_variant	MODERATE	24	0	0.046	38	20	0.484	5.40068
Aplan-CEM-ATC25-C1_vs_Aplan-CEM-PreTreatment	chr11	66691446	66691446	G	C	SPTBN2	c.5403C>G	p.Tyr1801*	stop_gained	HIGH	93	0	0.012	135	38	0.282	6.50594
Aplan-CEM-ATC25-C1_vs_Aplan-CEM-PreTreatment	chr11	66707662	66707662	C	G	SPTBN2	c.1507G>C	p.Ala503Pro	missense_variant	MODERATE	61	0	0.019	86	29	0.35	5.97674
Aplan-CEM-ATC25-C1_vs_Aplan-CEM-PreTreatment	chr11	66842933	66842933	C	T	C11orf80	c.1832C>T	p.Ala611Val	missense_variant	MODERATE	73	0	0.016	97	61	0.617	6.07072
Aplan-CEM-ATC25-C1_vs_Aplan-CEM-PreTreatment	chr11	67245222	67245222	C	G	KDM2A	c.1597C>G	p.Pro533Ala	missense_variant	MODERATE	50	1	0.025	78	25	0.328	4.97876
Aplan-CEM-ATC25-C1_vs_Aplan-CEM-PreTreatment	chr11	67290080	67290080	C	G	ANKRD13D	c.93C>G	p.His31Gln	missense_variant&splice_region_variant	MODERATE	85	0	0.013	130	31	0.233	5.82778
Aplan-CEM-ATC25-C1_vs_Aplan-CEM-PreTreatment	chr11	67300092	67300092	C	A	ANKRD13D	c.1042C>A	p.Arg348Ser	missense_variant	MODERATE	66	0	0.017	126	26	0.223	5.05861
Aplan-CEM-ATC25-C1_vs_Aplan-CEM-PreTreatment	chr11	67301546	67301546	C	T	ANKRD13D	c.1407C>T	p.Ser469Ser	synonymous_variant	LOW	82	0	0.013	114	27	0.235	6.00553
Aplan-CEM-ATC25-C1_vs_Aplan-CEM-PreTreatment	chr11	67306957	67306957	C	T	SSH3	c.459C>T	p.Asp153Asp	synonymous_variant	LOW	75	0	0.016	114	32	0.298	6.25997
Aplan-CEM-ATC25-C1_vs_Aplan-CEM-PreTreatment	chr11	67311878	67311878	C	G	SSH3	c.1971C>G	p.Gly657Gly	synonymous_variant	LOW	100	0	0.011	132	33	0.232	6.11499
Aplan-CEM-ATC25-C1_vs_Aplan-CEM-PreTreatment	chr11	67418817	67418817	G	C	CARNS1	c.426G>C	p.Pro142Pro	synonymous_variant	LOW	65	0	0.017	87	24	0.302	5.8031
Aplan-CEM-ATC25-C1_vs_Aplan-CEM-PreTreatment	chr11	67419482	67419482	T	G	CARNS1	c.853-5T>G		splice_region_variant&intron_variant	LOW	56	0	0.019	73	23	0.317	6.25257
Aplan-CEM-ATC25-C1_vs_Aplan-CEM-PreTreatment	chr11	67423762	67423762	G	A	CARNS1	c.2014G>A	p.Gly672Ser	missense_variant	MODERATE	90	0	0.012	112	48	0.414	5.73967
Aplan-CEM-ATC25-C1_vs_Aplan-CEM-PreTreatment	chr11	67432799	67432799	G	C	RPS6KB2	c.578G>C	p.Arg193Pro	missense_variant	MODERATE	39	0	0.029	57	17	0.302	4.23366
Aplan-CEM-ATC25-C1_vs_Aplan-CEM-PreTreatment	chr11	67440268	67440268	G	C	CORO1B	c.862-5C>G		splice_region_variant&intron_variant	LOW	75	0	0.015	92	21	0.237	5.83974
Aplan-CEM-ATC25-C1_vs_Aplan-CEM-PreTreatment	chr11	67452534	67452534	G	C	GPR152	c.191C>G	p.Thr64Arg	missense_variant	MODERATE	53	0	0.02	73	20	0.292	5.14546
Aplan-CEM-ATC25-C1_vs_Aplan-CEM-PreTreatment	chr11	67456307	67456307	G	C	CABP4	c.406G>C	p.Ala136Pro	missense_variant	MODERATE	52	0	0.021	86	24	0.267	5.45741
Aplan-CEM-ATC25-C1_vs_Aplan-CEM-PreTreatment	chr11	67493069	67493069	C	G	PITPNM1	c.3343-7G>C		splice_region_variant&intron_variant	LOW	39	0	0.029	58	19	0.326	4.82896
Aplan-CEM-ATC25-C1_vs_Aplan-CEM-PreTreatment	chr11	68357680	68357680	G	GC	LRP5	c.523dupC	p.Arg175fs	frameshift_variant	HIGH	37	0	0.027	65	19	0.292	4.01711
Aplan-CEM-ATC25-C1_vs_Aplan-CEM-PreTreatment	chr11	68413820	68413820	C	G	LRP5	c.2635C>G	p.Arg879Gly	missense_variant	MODERATE	35	0	0.029	77	19	0.22	3.18888
Aplan-CEM-ATC25-C1_vs_Aplan-CEM-PreTreatment	chr11	68448844	68448844	C	G	LRP5	c.4622C>G	p.Thr1541Arg	missense_variant	MODERATE	55	0	0.02	109	26	0.261	4.80259
Aplan-CEM-ATC25-C1_vs_Aplan-CEM-PreTreatment	chr11	68448908	68448908	C	G	LRP5	c.4686C>G	p.Tyr1562*	stop_gained	HIGH	56	0	0.02	107	23	0.234	4.53487
Aplan-CEM-ATC25-C1_vs_Aplan-CEM-PreTreatment	chr11	70486713	70486713	C	T	SHANK2	c.3580G>A	p.Gly1194Ser	missense_variant	MODERATE	48	0	0.022	99	46	0.453	6.49785
Aplan-CEM-ATC25-C1_vs_Aplan-CEM-PreTreatment	chr11	70487357	70487357	T	C	SHANK2	c.2936A>G	p.Asn979Ser	missense_variant	MODERATE	73	0	0.016	109	51	0.47	5.80881
Aplan-CEM-ATC25-C1_vs_Aplan-CEM-PreTreatment	chr11	71437819	71437819	G	A	DHCR7	c.956C>T	p.Thr319Met	missense_variant	MODERATE	45	0	0.026	69	38	0.55	6.30928
Aplan-CEM-ATC25-C1_vs_Aplan-CEM-PreTreatment	chr11	71582466	71582466	G	C	KRTAP5-11	c.372C>G	p.Pro124Pro	synonymous_variant	LOW	304	0	0.003733	518	122	0.244	5.64111
Aplan-CEM-ATC25-C1_vs_Aplan-CEM-PreTreatment	chr11	72015972	72015972	T	A	NUMA1	c.1531A>T	p.Asn511Tyr	missense_variant	MODERATE	88	0	0.013	107	51	0.469	5.90537
Aplan-CEM-ATC25-C1_vs_Aplan-CEM-PreTreatment	chr11	72237476	72237476	C	G	INPPL1	c.3232C>G	p.Arg1078Gly	missense_variant	MODERATE	74	0	0.014	98	19	0.216	4.96887
Aplan-CEM-ATC25-C1_vs_Aplan-CEM-PreTreatment	chr11	72240105	72240105	C	G	PHOX2A	c.499G>C	p.Glu167Gln	missense_variant	MODERATE	29	0	0.036	67	20	0.316	3.51195
Aplan-CEM-ATC25-C1_vs_Aplan-CEM-PreTreatment	chr11	73234881	73234881	G	C	P2RY2	c.722G>C	p.Arg241Pro	missense_variant	MODERATE	59	0	0.018	82	17	0.228	4.06679
Aplan-CEM-ATC25-C1_vs_Aplan-CEM-PreTreatment	chr11	73356309	73356309	T	C	ARHGEF17	c.3798T>C	p.Arg1266Arg	synonymous_variant	LOW	62	0	0.017	99	27	0.28	5.93159
Aplan-CEM-ATC25-C1_vs_Aplan-CEM-PreTreatment	chr11	74457278	74457278	T	C	KCNE3	c.286A>G	p.Ile96Val	missense_variant	MODERATE	53	0	0.02	58	11	0.226	3.19233
Aplan-CEM-ATC25-C1_vs_Aplan-CEM-PreTreatment	chr11	74836096	74836096	C	G	RNF169	c.1493C>G	p.Ser498Cys	missense_variant	MODERATE	48	0	0.02	81	23	0.28	5.16011
Aplan-CEM-ATC25-C1_vs_Aplan-CEM-PreTreatment	chr11	75089234	75089234	C	T	OR2AT4	c.480G>A	p.Leu160Leu	synonymous_variant	LOW	52	0	0.022	83	42	0.505	6.54846
Aplan-CEM-ATC25-C1_vs_Aplan-CEM-PreTreatment	chr11	75162668	75162668	G	C	SLCO2B1	c.30G>C	p.Glu10Asp	missense_variant	MODERATE	30	0	0.036	72	15	0.228	2.32842
Aplan-CEM-ATC25-C1_vs_Aplan-CEM-PreTreatment	chr11	75241411	75241411	C	G	TPBGL	c.362C>G	p.Ala121Gly	missense_variant	MODERATE	56	1	0.022	78	26	0.33	5.77534
Aplan-CEM-ATC25-C1_vs_Aplan-CEM-PreTreatment	chr11	75241524	75241524	G	A	TPBGL	c.475G>A	p.Ala159Thr	missense_variant	MODERATE	38	0	0.03	50	31	0.605	6.59563
Aplan-CEM-ATC25-C1_vs_Aplan-CEM-PreTreatment	chr11	75283410	75283410	C	A	ARRB1	c.231G>T	p.Lys77Asn	missense_variant	MODERATE	47	0	0.023	75	41	0.518	6.41981
Aplan-CEM-ATC25-C1_vs_Aplan-CEM-PreTreatment	chr11	76008850	76008850	A	G	UVRAG	c.1043A>G	p.Asn348Ser	missense_variant	MODERATE	19	0	0.056	20	10	0.474	3.36059
Aplan-CEM-ATC25-C1_vs_Aplan-CEM-PreTreatment	chr11	76661028	76661028	C	T	LRRC32	c.565G>A	p.Glu189Lys	missense_variant	MODERATE	51	0	0.021	80	18	0.235	3.96618
Aplan-CEM-ATC25-C1_vs_Aplan-CEM-PreTreatment	chr11	77040356	77040356	C	G	B3GNT6	c.805C>G	p.Gln269Glu	missense_variant	MODERATE	80	1	0.013	146	36	0.268	6.10012
Aplan-CEM-ATC25-C1_vs_Aplan-CEM-PreTreatment	chr11	77190832	77190832	C	T	MYO7A	c.3886C>T	p.Arg1296Trp	missense_variant	MODERATE	53	0	0.02	112	25	0.23	4.47532
Aplan-CEM-ATC25-C1_vs_Aplan-CEM-PreTreatment	chr11	77624992	77624992	T	C	CLNS1A	c.443A>G	p.Asp148Gly	missense_variant	MODERATE	26	0	0.045	35	10	0.333	2.48052
Aplan-CEM-ATC25-C1_vs_Aplan-CEM-PreTreatment	chr11	77907773	77907773	C	T	INTS4	c.1960G>A	p.Ala654Thr	missense_variant	MODERATE	29	0	0.043	44	18	0.41	4.4133
Aplan-CEM-ATC25-C1_vs_Aplan-CEM-PreTreatment	chr11	78196493	78196493	G	T	USP35	c.248G>T	p.Arg83Leu	missense_variant	MODERATE	58	0	0.02	67	26	0.387	5.95811
Aplan-CEM-ATC25-C1_vs_Aplan-CEM-PreTreatment	chr11	78209701	78209701	C	G	USP35	c.1846C>G	p.Arg616Gly	missense_variant	MODERATE	104	1	0.019	181	43	0.235	6.0967
Aplan-CEM-ATC25-C1_vs_Aplan-CEM-PreTreatment	chr11	78571425	78571425	C	G	NARS2	c.161G>C	p.Arg54Pro	missense_variant	MODERATE	27	0	0.045	32	10	0.333	2.93514
Aplan-CEM-ATC25-C1_vs_Aplan-CEM-PreTreatment	chr11	88567120	88567120	C	G	GRM5	c.2563G>C	p.Ala855Pro	missense_variant	MODERATE	29	0	0.039	38	13	0.363	3.53191
Aplan-CEM-ATC25-C1_vs_Aplan-CEM-PreTreatment	chr11	89875052	89875052	C	T	TRIM64B	c.430G>A	p.Asp144Asn	missense_variant	MODERATE	52	0	0.023	104	19	0.207	3.40171
Aplan-CEM-ATC25-C1_vs_Aplan-CEM-PreTreatment	chr11	92800724	92800724	T	A	FAT3	c.7711T>A	p.Phe2571Ile	missense_variant	MODERATE	48	0	0.021	98	41	0.427	6.48178
Aplan-CEM-ATC25-C1_vs_Aplan-CEM-PreTreatment	chr11	113399301	113399301	G	C	ANKK1	c.1332G>C	p.Ala444Ala	synonymous_variant	LOW	86	0	0.013	72	23	0.333	6.62585
Aplan-CEM-ATC25-C1_vs_Aplan-CEM-PreTreatment	chr11	113400079	113400079	A	T	ANKK1	c.2110A>T	p.Asn704Tyr	missense_variant	MODERATE	71	0	0.017	89	33	0.375	5.92532
Aplan-CEM-ATC25-C1_vs_Aplan-CEM-PreTreatment	chr11	114063402	114063402	C	G	ZBTB16	c.102C>G	p.Cys34Trp	missense_variant	MODERATE	73	0	0.016	83	35	0.403	5.76966
Aplan-CEM-ATC25-C1_vs_Aplan-CEM-PreTreatment	chr11	117911838	117911838	C	A	TMPRSS13	c.832G>T	p.Ala278Ser	missense_variant	MODERATE	26	0	0.045	21	7	0.368	2.73309
Aplan-CEM-ATC25-C1_vs_Aplan-CEM-PreTreatment	chr11	118210482	118210482	C	T	JAML	c.424+5G>A		splice_region_variant&intron_variant	LOW	40	0	0.027	39	23	0.605	5.94511
Aplan-CEM-ATC25-C1_vs_Aplan-CEM-PreTreatment	chr11	118555077	118555077	T	C	IFT46	c.420A>G	p.Thr140Thr	synonymous_variant	LOW	31	0	0.032	22	11	0.519	5.03364
Aplan-CEM-ATC25-C1_vs_Aplan-CEM-PreTreatment	chr11	119018893	119018893	G	A	TRAPPC4	c.98G>A	p.Ser33Asn	missense_variant	MODERATE	47	0	0.023	49	20	0.413	6.75458
Aplan-CEM-ATC25-C1_vs_Aplan-CEM-PreTreatment	chr11	119081205	119081205	C	G	VPS11	c.2552C>G	p.Ser851Trp	missense_variant	MODERATE	64	0	0.018	79	29	0.338	6.34343
Aplan-CEM-ATC25-C1_vs_Aplan-CEM-PreTreatment	chr11	119174636	119174636	G	A	NLRX1	c.1033G>A	p.Ala345Thr	missense_variant	MODERATE	54	0	0.019	64	48	0.715	5.78309
Aplan-CEM-ATC25-C1_vs_Aplan-CEM-PreTreatment	chr11	120137484	120137484	G	C	TRIM29	c.548C>G	p.Ala183Gly	missense_variant	MODERATE	53	0	0.02	108	34	0.341	6.25314
Aplan-CEM-ATC25-C1_vs_Aplan-CEM-PreTreatment	chr11	121452468	121452468	G	C	SORL1	c.137G>C	p.Arg46Pro	missense_variant	MODERATE	30	0	0.034	30	11	0.324	3.49647
Aplan-CEM-ATC25-C1_vs_Aplan-CEM-PreTreatment	chr11	123906846	123906846	A	G	OR8D4	c.415A>G	p.Arg139Gly	missense_variant	MODERATE	55	0	0.021	44	16	0.405	6.43344
Aplan-CEM-ATC25-C1_vs_Aplan-CEM-PreTreatment	chr11	124869041	124869041	G	T	ROBO3	c.400G>T	p.Ala134Ser	missense_variant	MODERATE	51	0	0.02	52	16	0.28	5.10735
Aplan-CEM-ATC25-C1_vs_Aplan-CEM-PreTreatment	chr11	124879190	124879190	G	A	ROBO3	c.3534G>A	p.Arg1178Arg	splice_region_variant&synonymous_variant	LOW	49	0	0.022	51	11	0.217	3.26601
Aplan-CEM-ATC25-C1_vs_Aplan-CEM-PreTreatment	chr11	124894237	124894237	C	G	ROBO4	c.1282G>C	p.Ala428Pro	missense_variant	MODERATE	44	0	0.024	66	20	0.317	4.77145
Aplan-CEM-ATC25-C1_vs_Aplan-CEM-PreTreatment	chr11	124921394	124921394	G	C	HEPACAM	c.995C>G	p.Ala332Gly	missense_variant	MODERATE	25	0	0.045	23	10	0.458	3.75717
Aplan-CEM-ATC25-C1_vs_Aplan-CEM-PreTreatment	chr11	128484932	128484932	C	G	ETS1	c.753G>C	p.Ser251Ser	synonymous_variant	LOW	31	0	0.031	57	20	0.383	4.36156
Aplan-CEM-ATC25-C1_vs_Aplan-CEM-PreTreatment	chr11	130473442	130473442	T	C	ADAMTS15	c.2474T>C	p.Val825Ala	missense_variant	MODERATE	80	0	0.014	97	38	0.39	6.14957
Aplan-CEM-ATC25-C1_vs_Aplan-CEM-PreTreatment	chr11	134382936	134382936	C	A	B3GAT1	c.692G>T	p.Arg231Leu	missense_variant	MODERATE	52	0	0.022	54	19	0.358	6.23539
Aplan-CEM-ATC25-C1_vs_Aplan-CEM-PreTreatment	chr11	134383012	134383012	A	AG	B3GAT1	c.622-7dupC		splice_region_variant&intron_variant	LOW	35	0	0.026	36	23	0.636	6.20558
Aplan-CEM-ATC25-C1_vs_Aplan-CEM-PreTreatment	chr12	908631	908631	G	C	WNK1	c.8341G>C	p.Ala2781Pro	missense_variant	MODERATE	67	0	0.018	89	19	0.234	5.00231
Aplan-CEM-ATC25-C1_vs_Aplan-CEM-PreTreatment	chr12	2567750	2567750	C	G	CACNA1C	c.1851C>G	p.Ser617Ser	synonymous_variant	LOW	26	0	0.043	44	13	0.282	2.9007
Aplan-CEM-ATC25-C1_vs_Aplan-CEM-PreTreatment	chr12	2823833	2823833	A	C	ITFG2	c.1130A>C	p.Lys377Thr	missense_variant	MODERATE	71	0	0.016	132	38	0.287	6.11499
Aplan-CEM-ATC25-C1_vs_Aplan-CEM-PreTreatment	chr12	4613643	4613643	G	A	DYRK4	c.1795G>A	p.Ala599Thr	missense_variant	MODERATE	61	0	0.017	98	38	0.378	6.17736
Aplan-CEM-ATC25-C1_vs_Aplan-CEM-PreTreatment	chr12	4657757	4657757	G	A	NDUFA9	c.328G>A	p.Ala110Thr	missense_variant	MODERATE	25	0	0.046	22	8	0.363	2.99272
Aplan-CEM-ATC25-C1_vs_Aplan-CEM-PreTreatment	chr12	4810340	4810340	A	G	KCNA6	c.299A>G	p.Tyr100Cys	missense_variant	MODERATE	114	0	0.009868	206	107	0.527	5.69812
Aplan-CEM-ATC25-C1_vs_Aplan-CEM-PreTreatment	chr12	4912595	4912595	T	C	KCNA1	c.1217T>C	p.Val406Ala	missense_variant	MODERATE	52	0	0.02	96	40	0.422	5.84727
Aplan-CEM-ATC25-C1_vs_Aplan-CEM-PreTreatment	chr12	5045135	5045135	A	G	KCNA5	c.988A>G	p.Thr330Ala	missense_variant	MODERATE	65	0	0.017	112	25	0.238	5.22545
Aplan-CEM-ATC25-C1_vs_Aplan-CEM-PreTreatment	chr12	6556009	6556009	G	C	IFFO1	c.21C>G	p.Pro7Pro	synonymous_variant	LOW	42	0	0.024	53	10	0.208	2.68292
Aplan-CEM-ATC25-C1_vs_Aplan-CEM-PreTreatment	chr12	6566191	6566191	G	C	NOP2	c.384C>G	p.His128Gln	missense_variant	MODERATE	55	1	0.02	64	17	0.299	3.80732
Aplan-CEM-ATC25-C1_vs_Aplan-CEM-PreTreatment	chr12	6620929	6620929	C	T	LPAR5	c.320G>A	p.Gly107Asp	missense_variant	MODERATE	61	0	0.017	81	29	0.355	6.49534
Aplan-CEM-ATC25-C1_vs_Aplan-CEM-PreTreatment	chr12	6640183	6640183	G	C	ACRBP	c.1302C>G	p.Tyr434*	stop_gained	HIGH	66	1	0.018	103	29	0.292	5.70378
Aplan-CEM-ATC25-C1_vs_Aplan-CEM-PreTreatment	chr12	6646958	6646958	G	C	ACRBP	c.98C>G	p.Thr33Ser	missense_variant	MODERATE	32	0	0.036	58	16	0.296	3.37039
Aplan-CEM-ATC25-C1_vs_Aplan-CEM-PreTreatment	chr12	6652732	6652732	G	C	ING4	c.430C>G	p.Arg144Gly	missense_variant	MODERATE	41	0	0.026	48	14	0.336	4.16871
Aplan-CEM-ATC25-C1_vs_Aplan-CEM-PreTreatment	chr12	6697491	6697491	C	G	PIANP	c.319G>C	p.Val107Leu	missense_variant	MODERATE	96	0	0.011	126	30	0.224	6.37601
Aplan-CEM-ATC25-C1_vs_Aplan-CEM-PreTreatment	chr12	6727952	6727952	C	T	COPS7A	c.189C>T	p.Thr63Thr	synonymous_variant	LOW	32	0	0.034	64	15	0.264	2.71588
Aplan-CEM-ATC25-C1_vs_Aplan-CEM-PreTreatment	chr12	6845668	6845668	T	C	GNB3	c.782T>C	p.Leu261Pro	missense_variant	MODERATE	37	0	0.03	36	14	0.394	4.98853
Aplan-CEM-ATC25-C1_vs_Aplan-CEM-PreTreatment	chr12	7189962	7189963	TG	T	PEX5	c.33delG	p.Leu12fs	frameshift_variant	HIGH	39	0	0.025	59	16	0.278	3.83986
Aplan-CEM-ATC25-C1_vs_Aplan-CEM-PreTreatment	chr12	7210085	7210085	T	C	PEX5	c.1845T>C	p.Gly615Gly	synonymous_variant	LOW	38	0	0.027	62	14	0.259	3.10692
Aplan-CEM-ATC25-C1_vs_Aplan-CEM-PreTreatment	chr12	8476198	8476198	A	T	CLEC6A	c.443A>T	p.Asn148Ile	missense_variant	MODERATE	14	0	0.067	28	13	0.48	2.79554
Aplan-CEM-ATC25-C1_vs_Aplan-CEM-PreTreatment	chr12	8937182	8937182	T	A	PHC1	c.2484T>A	p.Asn828Lys	missense_variant	MODERATE	38	0	0.028	42	20	0.439	6.24053
Aplan-CEM-ATC25-C1_vs_Aplan-CEM-PreTreatment	chr12	10015729	10015729	T	C	CLEC12B	c.680+2T>C	p.Y228H	splice_donor_variant&intron_variant	HIGH	56	0	0.019	76	37	0.515	6.43354
Aplan-CEM-ATC25-C1_vs_Aplan-CEM-PreTreatment	chr12	10071367	10071367	T	C	CLEC1A	c.809A>G	p.His270Arg	missense_variant	MODERATE	47	0	0.023	83	37	0.435	5.84443
Aplan-CEM-ATC25-C1_vs_Aplan-CEM-PreTreatment	chr12	12465603	12465603	G	C	BORCS5	c.418G>C	p.Ala140Pro	missense_variant	MODERATE	32	0	0.036	72	14	0.206	2.32817
Aplan-CEM-ATC25-C1_vs_Aplan-CEM-PreTreatment	chr12	13564068	13564068	C	G	GRIN2B	c.3170G>C	p.Arg1057Pro	missense_variant	MODERATE	37	0	0.027	66	19	0.264	3.99801
Aplan-CEM-ATC25-C1_vs_Aplan-CEM-PreTreatment	chr12	18723474	18723474	C	G	PLCZ1	c.204G>C	p.Thr68Thr	synonymous_variant	LOW	37	0	0.031	39	13	0.342	4.11628
Aplan-CEM-ATC25-C1_vs_Aplan-CEM-PreTreatment	chr12	20369843	20369843	T	C	PDE3A	c.559T>C	p.Ser187Pro	missense_variant	MODERATE	44	0	0.026	79	18	0.228	3.57431
Aplan-CEM-ATC25-C1_vs_Aplan-CEM-PreTreatment	chr12	21023191	21023191	A	G	SLCO1B7	c.490A>G	p.Thr164Ala	missense_variant&splice_region_variant	MODERATE	34	0	0.032	45	12	0.237	3.08422
Aplan-CEM-ATC25-C1_vs_Aplan-CEM-PreTreatment	chr12	25069390	25069390	C	T	LRMP	c.2848C>T	p.Leu950Phe	missense_variant	MODERATE	12	0	0.071	27	14	0.5	2.58733
Aplan-CEM-ATC25-C1_vs_Aplan-CEM-PreTreatment	chr12	26722446	26722446	G	A	ITPR2	c.476C>T	p.Ser159Phe	missense_variant	MODERATE	39	0	0.03	44	9	0.256	2.5526
Aplan-CEM-ATC25-C1_vs_Aplan-CEM-PreTreatment	chr12	31452348	31452348	A	G	DENND5B	c.1326T>C	p.Pro442Pro	synonymous_variant	LOW	59	0	0.019	85	21	0.235	5.26412
Aplan-CEM-ATC25-C1_vs_Aplan-CEM-PreTreatment	chr12	32755332	32755332	G	C	YARS2	c.543C>G	p.His181Gln	missense_variant	MODERATE	101	0	0.011	101	29	0.304	6.54652
Aplan-CEM-ATC25-C1_vs_Aplan-CEM-PreTreatment	chr12	40310542	40310542	C	T	LRRK2	c.4429C>T	p.Arg1477*	stop_gained	HIGH	39	0	0.028	54	12	0.239	2.97879
Aplan-CEM-ATC25-C1_vs_Aplan-CEM-PreTreatment	chr12	43772280	43772280	A	G	IRAK4	c.408A>G	p.Thr136Thr	synonymous_variant	LOW	36	0	0.031	52	28	0.535	6.4842
Aplan-CEM-ATC25-C1_vs_Aplan-CEM-PreTreatment	chr12	47985947	47985947	C	A	COL2A1	c.1546G>T	p.Gly516Cys	missense_variant	MODERATE	33	0	0.031	43	13	0.297	3.46452
Aplan-CEM-ATC25-C1_vs_Aplan-CEM-PreTreatment	chr12	48472699	48472699	G	A	ANP32D	c.35G>A	p.Arg12Gln	missense_variant	MODERATE	52	0	0.022	76	23	0.333	5.71665
Aplan-CEM-ATC25-C1_vs_Aplan-CEM-PreTreatment	chr12	48980524	48980524	T	C	WNT1	c.459T>C	p.C153C	sequence_feature	MODERATE	78	0	0.016	86	23	0.272	6.58901
Aplan-CEM-ATC25-C1_vs_Aplan-CEM-PreTreatment	chr12	49040403	49040403	C	T	KMT2D	c.7367G>A	p.Arg2456His	missense_variant	MODERATE	74	0	0.014	105	28	0.261	6.56635
Aplan-CEM-ATC25-C1_vs_Aplan-CEM-PreTreatment	chr12	49089868	49089868	T	C	DHH	c.1182A>G	p.Leu394Leu	synonymous_variant	LOW	61	0	0.018	86	41	0.462	6.24057
Aplan-CEM-ATC25-C1_vs_Aplan-CEM-PreTreatment	chr12	49349403	49349403	G	C	DNAJC22	c.531G>C	p.Pro177Pro	synonymous_variant	LOW	72	0	0.015	130	28	0.222	5.68251
Aplan-CEM-ATC25-C1_vs_Aplan-CEM-PreTreatment	chr12	49605457	49605458	TG	T	FAM186B	c.20delC	p.Pro7fs	frameshift_variant	HIGH	45	0	0.022	56	21	0.384	5.68836
Aplan-CEM-ATC25-C1_vs_Aplan-CEM-PreTreatment	chr12	50077264	50077264	C	G	ASIC1	c.610C>G	p.Arg204Gly	missense_variant	MODERATE	73	0	0.016	92	25	0.295	6.7434
Aplan-CEM-ATC25-C1_vs_Aplan-CEM-PreTreatment	chr12	50078110	50078110	G	A	ASIC1	c.820G>A	p.Ala274Thr	missense_variant	MODERATE	61	0	0.019	100	24	0.212	5.3609
Aplan-CEM-ATC25-C1_vs_Aplan-CEM-PreTreatment	chr12	50078126	50078126	G	C	ASIC1	c.836G>C	p.Arg279Pro	missense_variant&splice_region_variant	MODERATE	62	0	0.02	97	21	0.202	4.80975
Aplan-CEM-ATC25-C1_vs_Aplan-CEM-PreTreatment	chr12	52015059	52015059	G	A	GRASP	c.1048G>A	p.Ala350Thr	missense_variant	MODERATE	13	0	0.071	29	12	0.407	2.11327
Aplan-CEM-ATC25-C1_vs_Aplan-CEM-PreTreatment	chr12	52291313	52291313	G	A	KRT81	c.153C>T	p.Cys51Cys	synonymous_variant	LOW	98	0	0.012	165	80	0.496	6.0665
Aplan-CEM-ATC25-C1_vs_Aplan-CEM-PreTreatment	chr12	52367224	52367224	G	A	KRT85	c.182C>T	p.Ser61Phe	missense_variant	MODERATE	102	0	0.011	163	61	0.373	5.68688
Aplan-CEM-ATC25-C1_vs_Aplan-CEM-PreTreatment	chr12	52675323	52675323	C	G	KRT1	c.1805G>C	p.Arg602Pro	missense_variant	MODERATE	121	0	0.008445	186	43	0.243	6.02345
Aplan-CEM-ATC25-C1_vs_Aplan-CEM-PreTreatment	chr12	52678596	52678596	C	G	KRT1	c.752G>C	p.Arg251Pro	missense_variant	MODERATE	60	0	0.019	49	16	0.318	6.25086
Aplan-CEM-ATC25-C1_vs_Aplan-CEM-PreTreatment	chr12	52692516	52692516	C	G	KRT77	c.1332G>C	p.Arg444Arg	synonymous_variant	LOW	102	0	0.011	103	27	0.278	5.86547
Aplan-CEM-ATC25-C1_vs_Aplan-CEM-PreTreatment	chr12	52703066	52703066	C	G	KRT77	c.369G>C	p.Gly123Gly	synonymous_variant	LOW	43	0	0.025	71	19	0.288	4.29372
Aplan-CEM-ATC25-C1_vs_Aplan-CEM-PreTreatment	chr12	52703140	52703140	C	A	KRT77	c.295G>T	p.Val99Phe	missense_variant	MODERATE	32	0	0.029	62	19	0.323	3.67175
Aplan-CEM-ATC25-C1_vs_Aplan-CEM-PreTreatment	chr12	52790167	52790167	C	G	KRT3	c.1762G>C	p.Gly588Arg	missense_variant	MODERATE	65	0	0.017	125	25	0.211	4.77062
Aplan-CEM-ATC25-C1_vs_Aplan-CEM-PreTreatment	chr12	52795860	52795860	G	C	KRT3	c.183C>G	p.Gly61Gly	synonymous_variant	LOW	121	0	0.008512	168	37	0.234	6.39594
Aplan-CEM-ATC25-C1_vs_Aplan-CEM-PreTreatment	chr12	52810794	52810794	G	C	KRT4	c.700C>G	p.Arg234Gly	missense_variant	MODERATE	22	0	0.05	26	9	0.349	2.66562
Aplan-CEM-ATC25-C1_vs_Aplan-CEM-PreTreatment	chr12	52823211	52823211	G	A	KRT79	c.1172C>T	p.Ala391Val	missense_variant	MODERATE	47	0	0.021	57	22	0.384	5.98833
Aplan-CEM-ATC25-C1_vs_Aplan-CEM-PreTreatment	chr12	52844600	52844600	G	C	KRT78	c.880C>G	p.Arg294Gly	missense_variant	MODERATE	53	0	0.021	70	14	0.216	3.57873
Aplan-CEM-ATC25-C1_vs_Aplan-CEM-PreTreatment	chr12	52848655	52848656	CA	GG	KRT78	c.275_276delTGinsCC	p.Leu92Pro	missense_variant	MODERATE	61	0	0.017	66	18	0.262	5.60133
Aplan-CEM-ATC25-C1_vs_Aplan-CEM-PreTreatment	chr12	52848776	52848776	C	G	KRT78	c.155G>C	p.Arg52Pro	missense_variant	MODERATE	67	0	0.016	75	16	0.225	4.74925
Aplan-CEM-ATC25-C1_vs_Aplan-CEM-PreTreatment	chr12	53196148	53196148	C	T	ITGB7	c.868G>A	p.Asp290Asn	missense_variant	MODERATE	61	0	0.019	82	37	0.426	6.24942
Aplan-CEM-ATC25-C1_vs_Aplan-CEM-PreTreatment	chr12	53293384	53293384	C	G	ESPL1	c.6273C>G	p.Tyr2091*	stop_gained	HIGH	45	0	0.026	55	20	0.383	5.9214
Aplan-CEM-ATC25-C1_vs_Aplan-CEM-PreTreatment	chr12	54257498	54257499	GA	G	CBX5	c.137+15delT		sequence_feature	LOW	34	0	0.031	46	10	0.23	2.39569
Aplan-CEM-ATC25-C1_vs_Aplan-CEM-PreTreatment	chr12	54363232	54363232	C	A	GPR84	c.620G>T	p.Arg207Leu	missense_variant	MODERATE	39	0	0.026	60	18	0.33	4.13205
Aplan-CEM-ATC25-C1_vs_Aplan-CEM-PreTreatment	chr12	54370379	54370379	C	A	ZNF385A	c.1038G>T	p.Leu346Leu	synonymous_variant	LOW	43	0	0.026	68	26	0.386	5.97996
Aplan-CEM-ATC25-C1_vs_Aplan-CEM-PreTreatment	chr12	54404883	54404883	C	G	ITGA5	c.1237G>C	p.Gly413Arg	missense_variant	MODERATE	33	0	0.033	55	12	0.255	2.54377
Aplan-CEM-ATC25-C1_vs_Aplan-CEM-PreTreatment	chr12	54531769	54531769	A	G	NCKAP1L	c.2725A>G	p.Thr909Ala	missense_variant	MODERATE	46	0	0.025	39	15	0.395	5.85452
Aplan-CEM-ATC25-C1_vs_Aplan-CEM-PreTreatment	chr12	55965967	55965967	T	C	PMEL	c.45A>G	p.Ile15Met	missense_variant	MODERATE	51	0	0.022	66	19	0.31	5.25619
Aplan-CEM-ATC25-C1_vs_Aplan-CEM-PreTreatment	chr12	56172496	56172496	G	A	SMARCC2	c.1864-6C>T		splice_region_variant&intron_variant	LOW	57	0	0.02	68	23	0.344	6.10835
Aplan-CEM-ATC25-C1_vs_Aplan-CEM-PreTreatment	chr12	56254170	56254170	G	A	ANKRD52	c.803C>T	p.Pro268Leu	missense_variant	MODERATE	76	0	0.016	81	36	0.424	6.5719
Aplan-CEM-ATC25-C1_vs_Aplan-CEM-PreTreatment	chr12	56472705	56472705	A	G	GLS2	c.1496T>C	p.Val499Ala	missense_variant	MODERATE	21	0	0.059	36	14	0.424	3.07279
Aplan-CEM-ATC25-C1_vs_Aplan-CEM-PreTreatment	chr12	56741744	56741744	A	G	PRIM1	c.840+2T>C		splice_donor_variant&intron_variant	HIGH	53	0	0.022	69	17	0.267	4.56307
Aplan-CEM-ATC25-C1_vs_Aplan-CEM-PreTreatment	chr12	57092584	57092584	G	A	NAB2	c.1091+3G>A		splice_region_variant&intron_variant	LOW	55	0	0.021	68	14	0.21	3.62989
Aplan-CEM-ATC25-C1_vs_Aplan-CEM-PreTreatment	chr12	57180038	57180039	TC	T	LRP1	c.5142-3delC		splice_region_variant&intron_variant	LOW	37	0	0.029	49	16	0.301	4.40323
Aplan-CEM-ATC25-C1_vs_Aplan-CEM-PreTreatment	chr12	57525640	57525640	T	C	MBD6	c.672T>C	p.Ala224Ala	synonymous_variant	LOW	70	0	0.016	132	33	0.258	5.87141
Aplan-CEM-ATC25-C1_vs_Aplan-CEM-PreTreatment	chr12	57526633	57526633	C	T	MBD6	c.1488C>T	p.Ser496Ser	synonymous_variant	LOW	69	0	0.015	90	45	0.5	6.02867
Aplan-CEM-ATC25-C1_vs_Aplan-CEM-PreTreatment	chr12	57534359	57534359	G	A	DCTN2	c.472C>T	p.His158Tyr	missense_variant	MODERATE	56	0	0.02	78	19	0.264	4.75591
Aplan-CEM-ATC25-C1_vs_Aplan-CEM-PreTreatment	chr12	57569983	57569983	G	A	KIF5A	c.1118-4G>A		splice_region_variant&intron_variant	LOW	44	0	0.024	64	15	0.263	3.50815
Aplan-CEM-ATC25-C1_vs_Aplan-CEM-PreTreatment	chr12	64097235	64097235	T	C	SRGAP1	c.1679-6T>C		splice_region_variant&intron_variant	LOW	30	0	0.036	40	8	0.225	2.05718
Aplan-CEM-ATC25-C1_vs_Aplan-CEM-PreTreatment	chr12	64420253	64420253	A	G	XPOT	c.673A>G	p.Arg225Gly	missense_variant&splice_region_variant	MODERATE	43	0	0.025	72	16	0.213	3.36198
Aplan-CEM-ATC25-C1_vs_Aplan-CEM-PreTreatment	chr12	89603845	89603845	T	C	ATP2B1	c.2715A>G	p.Glu905Glu	synonymous_variant	LOW	61	0	0.018	59	13	0.26	4.33527
Aplan-CEM-ATC25-C1_vs_Aplan-CEM-PreTreatment	chr12	90954399	90954399	T	C	CCER1	c.344A>G	p.His115Arg	missense_variant	MODERATE	79	0	0.014	86	50	0.568	6.31263
Aplan-CEM-ATC25-C1_vs_Aplan-CEM-PreTreatment	chr12	94375950	94375950	T	C	CEP83	c.869A>G	p.Gln290Arg	missense_variant	MODERATE	36	0	0.033	34	19	0.531	6.78341
Aplan-CEM-ATC25-C1_vs_Aplan-CEM-PreTreatment	chr12	96679628	96679628	C	G	CFAP54	c.5592C>G	p.Cys1864Trp	missense_variant	MODERATE	32	0	0.031	60	19	0.333	3.98972
Aplan-CEM-ATC25-C1_vs_Aplan-CEM-PreTreatment	chr12	98727191	98727191	G	C	APAF1	c.3475G>C	p.Gly1159Arg	missense_variant	MODERATE	34	0	0.033	37	8	0.212	2.27283
Aplan-CEM-ATC25-C1_vs_Aplan-CEM-PreTreatment	chr12	100402364	100402364	T	A	SLC17A8	c.788T>A	p.Met263Lys	missense_variant	MODERATE	43	0	0.027	54	15	0.261	4.07439
Aplan-CEM-ATC25-C1_vs_Aplan-CEM-PreTreatment	chr12	103725101	103725101	C	G	STAB2	c.4803+7C>G		splice_region_variant&intron_variant	LOW	59	0	0.019	98	27	0.241	5.99572
Aplan-CEM-ATC25-C1_vs_Aplan-CEM-PreTreatment	chr12	103777993	103777993	G	A	NT5DC3	c.1483C>T	p.Arg495Cys	missense_variant	MODERATE	56	0	0.02	60	31	0.5	6.32476
Aplan-CEM-ATC25-C1_vs_Aplan-CEM-PreTreatment	chr12	104126109	104126109	G	A	NFYB	c.231+5C>T		splice_region_variant&intron_variant	LOW	42	0	0.029	67	37	0.571	5.92782
Aplan-CEM-ATC25-C1_vs_Aplan-CEM-PreTreatment	chr12	109798861	109798861	T	C	TRPV4	c.905A>G	p.N302S	structural_interaction_variant	HIGH	61	0	0.019	82	24	0.305	5.8765
Aplan-CEM-ATC25-C1_vs_Aplan-CEM-PreTreatment	chr12	109798916	109798916	C	T	TRPV4	c.854-4G>A		splice_region_variant&intron_variant	LOW	44	0	0.025	63	18	0.29	4.52722
Aplan-CEM-ATC25-C1_vs_Aplan-CEM-PreTreatment	chr12	109808384	109808384	G	A	TRPV4	c.471C>T	p.Ile157Ile	synonymous_variant	LOW	46	0	0.023	77	27	0.372	6.2686
Aplan-CEM-ATC25-C1_vs_Aplan-CEM-PreTreatment	chr12	110486615	110486615	A	G	FAM216A	c.518A>G	p.Gln173Arg	missense_variant	MODERATE	67	0	0.017	70	29	0.426	6.32937
Aplan-CEM-ATC25-C1_vs_Aplan-CEM-PreTreatment	chr12	112151952	112151952	G	A	TRAFD1	c.1431G>A	p.Gln477Gln	synonymous_variant	LOW	82	0	0.014	109	23	0.228	5.9153
Aplan-CEM-ATC25-C1_vs_Aplan-CEM-PreTreatment	chr12	112306219	112306219	G	T	HECTD4	c.1180C>A	p.Pro394Thr	missense_variant	MODERATE	60	0	0.019	81	24	0.314	5.90476
Aplan-CEM-ATC25-C1_vs_Aplan-CEM-PreTreatment	chr12	113077438	113077438	G	C	DTX1	c.274G>C	p.Val92Leu	missense_variant	MODERATE	73	0	0.016	76	16	0.224	4.88092
Aplan-CEM-ATC25-C1_vs_Aplan-CEM-PreTreatment	chr12	113115737	113115737	A	G	RASAL1	c.901T>C	p.Cys301Arg	missense_variant	MODERATE	48	0	0.021	56	33	0.597	6.18334
Aplan-CEM-ATC25-C1_vs_Aplan-CEM-PreTreatment	chr12	113393104	113393104	G	A	SDS	c.824C>T	p.Ala275Val	missense_variant	MODERATE	40	0	0.029	58	30	0.539	6.55743
Aplan-CEM-ATC25-C1_vs_Aplan-CEM-PreTreatment	chr12	113471472	113471472	C	T	LHX5	c.27G>A	p.Glu9Glu	synonymous_variant	LOW	34	0	0.031	62	24	0.404	5.37607
Aplan-CEM-ATC25-C1_vs_Aplan-CEM-PreTreatment	chr12	114674467	114674467	C	A	TBX3	c.1468G>T	p.Ala490Ser	missense_variant	MODERATE	61	0	0.017	142	40	0.294	6.43018
Aplan-CEM-ATC25-C1_vs_Aplan-CEM-PreTreatment	chr12	114674473	114674473	C	G	TBX3	c.1462G>C	p.Ala488Pro	missense_variant	MODERATE	59	0	0.017	137	42	0.303	5.70355
Aplan-CEM-ATC25-C1_vs_Aplan-CEM-PreTreatment	chr12	117761239	117761239	C	G	KSR2	c.758G>C	p.Arg253Pro	missense_variant	MODERATE	60	0	0.02	113	30	0.248	6.06165
Aplan-CEM-ATC25-C1_vs_Aplan-CEM-PreTreatment	chr12	118068492	118068492	T	C	VSIG10	c.1452A>G	p.Ala484Ala	synonymous_variant	LOW	117	0	0.011	142	35	0.238	5.73751
Aplan-CEM-ATC25-C1_vs_Aplan-CEM-PreTreatment	chr12	118403474	118403474	G	C	SUDS3	c.760G>C	p.Glu254Gln	missense_variant	MODERATE	32	0	0.035	44	15	0.368	4.05337
Aplan-CEM-ATC25-C1_vs_Aplan-CEM-PreTreatment	chr12	119130773	119130773	A	G	SRRM4	c.710A>G	p.Gln237Arg	missense_variant	MODERATE	33	0	0.031	95	18	0.215	2.44548
Aplan-CEM-ATC25-C1_vs_Aplan-CEM-PreTreatment	chr12	119690159	119690159	C	G	CIT	c.6178G>C	p.Val2060Leu	missense_variant	MODERATE	43	0	0.023	87	19	0.254	3.46864
Aplan-CEM-ATC25-C1_vs_Aplan-CEM-PreTreatment	chr12	119690328	119690328	C	G	CIT	c.6009G>C	p.Glu2003Asp	missense_variant	MODERATE	84	0	0.014	90	29	0.331	6.11341
Aplan-CEM-ATC25-C1_vs_Aplan-CEM-PreTreatment	chr12	119690361	119690361	C	G	CIT	c.5976G>C	p.Pro1992Pro	synonymous_variant	LOW	80	0	0.015	73	27	0.379	6.76149
Aplan-CEM-ATC25-C1_vs_Aplan-CEM-PreTreatment	chr12	119700795	119700795	C	G	CIT	c.5573G>C	p.Arg1858Thr	missense_variant	MODERATE	17	0	0.059	30	11	0.414	2.42276
Aplan-CEM-ATC25-C1_vs_Aplan-CEM-PreTreatment	chr12	120994311	120994312	CG	C	HNF1A	c.864delG	p.Pro291fs	frameshift_variant	HIGH	64	1	0.031	73	37	0.539	6.07937
Aplan-CEM-ATC25-C1_vs_Aplan-CEM-PreTreatment	chr12	121934293	121934293	G	C	WDR66	c.935G>C	p.Arg312Pro	missense_variant	MODERATE	35	0	0.029	49	12	0.214	2.99789
Aplan-CEM-ATC25-C1_vs_Aplan-CEM-PreTreatment	chr12	122982041	122982041	G	A	ARL6IP4	c.1106G>A	p.Arg369His	missense_variant	MODERATE	63	0	0.016	87	25	0.321	6.2798
Aplan-CEM-ATC25-C1_vs_Aplan-CEM-PreTreatment	chr12	123202759	123202759	A	G	MPHOSPH9	c.1646T>C	p.Val549Ala	missense_variant	MODERATE	57	0	0.019	92	23	0.247	5.11622
Aplan-CEM-ATC25-C1_vs_Aplan-CEM-PreTreatment	chr12	123298011	123298011	G	A	SBNO1	c.4006C>T	p.Arg1336Trp	missense_variant	MODERATE	42	0	0.027	50	13	0.296	3.76863
Aplan-CEM-ATC25-C1_vs_Aplan-CEM-PreTreatment	chr12	124340400	124340400	G	A	NCOR2	c.5382C>T	p.Ser1794Ser	synonymous_variant	LOW	85	0	0.012	131	38	0.269	6.17388
Aplan-CEM-ATC25-C1_vs_Aplan-CEM-PreTreatment	chr12	124993856	124993856	G	GCTC	BRI3BP	c.68_69insCCT	p.Leu23dup	disruptive_inframe_insertion	MODERATE	32	0	0.035	55	12	0.222	2.51499
Aplan-CEM-ATC25-C1_vs_Aplan-CEM-PreTreatment	chr12	128705496	128705496	G	A	TMEM132C	c.2528G>A	p.Ser843Asn	missense_variant	MODERATE	70	0	0.015	128	35	0.288	5.93351
Aplan-CEM-ATC25-C1_vs_Aplan-CEM-PreTreatment	chr12	128706177	128706177	C	T	TMEM132C	c.3209C>T	p.Thr1070Met	missense_variant	MODERATE	67	0	0.017	125	33	0.294	5.86748
Aplan-CEM-ATC25-C1_vs_Aplan-CEM-PreTreatment	chr12	131908916	131908916	G	C	ULK1	c.509G>C	p.R170P	structural_interaction_variant	HIGH	92	0	0.011	156	45	0.291	6.12775
Aplan-CEM-ATC25-C1_vs_Aplan-CEM-PreTreatment	chr12	131909970	131909970	G	A	ULK1	c.777G>A	p.Leu259Leu	synonymous_variant	LOW	50	0	0.021	67	37	0.549	5.71043
Aplan-CEM-ATC25-C1_vs_Aplan-CEM-PreTreatment	chr12	132926666	132926666	C	T	ZNF605	c.726G>A	p.Leu242Leu	synonymous_variant	LOW	53	0	0.021	117	54	0.445	6.0132
Aplan-CEM-ATC25-C1_vs_Aplan-CEM-PreTreatment	chr13	20064548	20064548	A	G	ZMYM2	c.3132+3A>G		splice_region_variant&intron_variant	LOW	38	0	0.032	42	20	0.5	6.24053
Aplan-CEM-ATC25-C1_vs_Aplan-CEM-PreTreatment	chr13	21495210	21495210	T	C	MICU2	c.1151A>G	p.His384Arg	missense_variant	MODERATE	41	0	0.029	51	23	0.475	6.70654
Aplan-CEM-ATC25-C1_vs_Aplan-CEM-PreTreatment	chr13	21566939	21566940	AT	A	MICU2	c.215delA	p.Asn72fs	frameshift_variant	HIGH	26	0	0.038	48	11	0.271	2.19984
Aplan-CEM-ATC25-C1_vs_Aplan-CEM-PreTreatment	chr13	27435586	27435587	AC	A	GTF3A	c.1090delC	p.Gly365fs	frameshift_variant	HIGH	37	0	0.027	54	36	0.617	6.03003
Aplan-CEM-ATC25-C1_vs_Aplan-CEM-PreTreatment	chr13	27968705	27968705	G	C	CDX2	c.302C>G	p.Pro101Arg	missense_variant	MODERATE	70	0	0.015	69	14	0.215	4.57858
Aplan-CEM-ATC25-C1_vs_Aplan-CEM-PreTreatment	chr13	28062038	28062038	G	T	FLT3	c.197C>A	p.Ala66Glu	missense_variant	MODERATE	37	0	0.03	60	12	0.24	2.53723
Aplan-CEM-ATC25-C1_vs_Aplan-CEM-PreTreatment	chr13	29100904	29100904	G	A	MTUS2	c.2608G>A	p.Val870Ile	missense_variant	MODERATE	61	0	0.019	95	28	0.268	6.28378
Aplan-CEM-ATC25-C1_vs_Aplan-CEM-PreTreatment	chr13	31143814	31143814	T	C	HSPH1	c.1700A>G	p.Asn567Ser	missense_variant	MODERATE	27	0	0.04	59	24	0.408	4.70044
Aplan-CEM-ATC25-C1_vs_Aplan-CEM-PreTreatment	chr13	32326149	32326149	A	G	BRCA2	c.474A>G	p.Ser158Ser	splice_region_variant&synonymous_variant	LOW	30	0	0.04	52	12	0.244	2.52183
Aplan-CEM-ATC25-C1_vs_Aplan-CEM-PreTreatment	chr13	32770441	32770442	CA	C	PDS5B	c.3954delA	p.Lys1318fs	frameshift_variant	HIGH	41	0	0.024	71	32	0.45	6.16837
Aplan-CEM-ATC25-C1_vs_Aplan-CEM-PreTreatment	chr13	37692072	37692072	G	C	TRPC4	c.1161C>G	p.Ile387Met	missense_variant	MODERATE	52	0	0.022	90	21	0.26	4.44984
Aplan-CEM-ATC25-C1_vs_Aplan-CEM-PreTreatment	chr13	38689041	38689041	A	G	FREM2	c.1697A>G	p.Asn566Ser	missense_variant	MODERATE	45	0	0.024	70	20	0.293	4.71069
Aplan-CEM-ATC25-C1_vs_Aplan-CEM-PreTreatment	chr13	40666135	40666135	C	T	FOXO1	c.78G>A	p.Pro26Pro	synonymous_variant	LOW	43	0	0.026	66	17	0.259	4.05749
Aplan-CEM-ATC25-C1_vs_Aplan-CEM-PreTreatment	chr13	41320812	41320812	T	C	NAA16	c.390T>C	p.Leu130Leu	synonymous_variant	LOW	30	0	0.034	48	20	0.395	5.02009
Aplan-CEM-ATC25-C1_vs_Aplan-CEM-PreTreatment	chr13	42295712	42295712	T	C	AKAP11	c.186T>C	p.Phe62Phe	synonymous_variant	LOW	25	0	0.045	38	15	0.394	3.80128
Aplan-CEM-ATC25-C1_vs_Aplan-CEM-PreTreatment	chr13	45596749	45596749	A	G	ERICH6B	c.257T>C	p.Leu86Pro	missense_variant	MODERATE	121	0	0.008787	181	44	0.245	6.26211
Aplan-CEM-ATC25-C1_vs_Aplan-CEM-PreTreatment	chr13	48499702	48499702	C	T	RCBTB2	c.1318G>A	p.Glu440Lys	missense_variant	MODERATE	48	0	0.023	50	9	0.217	2.57547
Aplan-CEM-ATC25-C1_vs_Aplan-CEM-PreTreatment	chr13	48707251	48707251	G	A	CYSLTR2	c.434G>A	p.Arg145Gln	missense_variant	MODERATE	66	0	0.016	108	26	0.242	5.54208
Aplan-CEM-ATC25-C1_vs_Aplan-CEM-PreTreatment	chr13	52386121	52386121	G	A	THSD1	c.1087C>T	p.Arg363Cys	missense_variant	MODERATE	37	0	0.03	56	10	0.204	2.2747
Aplan-CEM-ATC25-C1_vs_Aplan-CEM-PreTreatment	chr13	52436288	52436288	A	G	VPS36	c.351+2T>C		splice_donor_variant&intron_variant	HIGH	28	0	0.045	49	18	0.342	3.89589
Aplan-CEM-ATC25-C1_vs_Aplan-CEM-PreTreatment	chr13	61413597	61413597	T	C	PCDH20	c.502A>G	p.Ile168Val	missense_variant	MODERATE	45	0	0.024	116	36	0.296	5.53034
Aplan-CEM-ATC25-C1_vs_Aplan-CEM-PreTreatment	chr13	67226154	67226154	A	G	PCDH9	c.2287T>C	p.Ser763Pro	missense_variant	MODERATE	52	0	0.022	56	13	0.235	3.91147
Aplan-CEM-ATC25-C1_vs_Aplan-CEM-PreTreatment	chr13	73075758	73075758	C	G	KLF5	c.1246C>G	p.Arg416Gly	missense_variant	MODERATE	18	0	0.051	44	17	0.343	2.89943
Aplan-CEM-ATC25-C1_vs_Aplan-CEM-PreTreatment	chr13	87675997	87675997	G	A	SLITRK5	c.609G>A	p.Thr203Thr	synonymous_variant	LOW	48	0	0.021	80	37	0.486	6.27564
Aplan-CEM-ATC25-C1_vs_Aplan-CEM-PreTreatment	chr13	93227606	93227606	G	T	GPC6	c.150G>T	p.Gln50His	missense_variant	MODERATE	17	0	0.056	21	9	0.494	2.70946
Aplan-CEM-ATC25-C1_vs_Aplan-CEM-PreTreatment	chr13	94578014	94578014	T	C	TGDS	c.816A>G	p.Leu272Leu	synonymous_variant	LOW	20	0	0.049	36	11	0.314	2.31954
Aplan-CEM-ATC25-C1_vs_Aplan-CEM-PreTreatment	chr13	101453930	101453930	G	C	ITGBL1	c.146G>C	p.Arg49Pro	missense_variant	MODERATE	36	0	0.029	37	8	0.228	2.29045
Aplan-CEM-ATC25-C1_vs_Aplan-CEM-PreTreatment	chr13	102737012	102737012	C	G	CCDC168	c.13685G>C	p.Ser4562Thr	missense_variant	MODERATE	53	0	0.021	72	13	0.218	3.2262
Aplan-CEM-ATC25-C1_vs_Aplan-CEM-PreTreatment	chr13	103058287	103058287	A	T	SLC10A2	c.473T>A	p.Ile158Asn	missense_variant	MODERATE	14	0	0.077	21	11	0.474	3.04738
Aplan-CEM-ATC25-C1_vs_Aplan-CEM-PreTreatment	chr13	107866225	107866225	G	C	FAM155A	c.372C>G	p.Ser124Ser	synonymous_variant	LOW	67	0	0.015	121	28	0.24	5.73503
Aplan-CEM-ATC25-C1_vs_Aplan-CEM-PreTreatment	chr13	110163508	110163508	C	G	COL4A1	c.4204G>C	p.Gly1402Arg	missense_variant	MODERATE	51	0	0.024	51	15	0.292	4.73796
Aplan-CEM-ATC25-C1_vs_Aplan-CEM-PreTreatment	chr13	112854371	112854371	C	G	ATP11A	c.2084C>G	p.Ala695Gly	missense_variant	MODERATE	61	0	0.018	92	32	0.333	5.9515
Aplan-CEM-ATC25-C1_vs_Aplan-CEM-PreTreatment	chr13	113631675	113631675	G	C	TFDP1	c.239G>C	p.Ser80Thr	missense_variant	MODERATE	66	0	0.019	62	16	0.26	5.53337
Aplan-CEM-ATC25-C1_vs_Aplan-CEM-PreTreatment	chr13	113631689	113631689	A	C	TFDP1	c.253A>C	p.Ser85Arg	missense_variant	MODERATE	72	0	0.018	60	15	0.271	5.60739
Aplan-CEM-ATC25-C1_vs_Aplan-CEM-PreTreatment	chr13	113828555	113828555	C	G	GAS6	c.1300G>C	p.Val434Leu	missense_variant	MODERATE	38	0	0.027	46	17	0.369	4.95997
Aplan-CEM-ATC25-C1_vs_Aplan-CEM-PreTreatment	chr13	113839744	113839745	GC	G	GAS6	c.449delG	p.Gly150fs	frameshift_variant	HIGH	46	0	0.024	94	19	0.219	3.42913
Aplan-CEM-ATC25-C1_vs_Aplan-CEM-PreTreatment	chr14	20584243	20584243	A	G	RNASE11	c.232T>C	p.Phe78Leu	missense_variant	MODERATE	66	0	0.017	94	44	0.524	5.80866
Aplan-CEM-ATC25-C1_vs_Aplan-CEM-PreTreatment	chr14	21025589	21025589	G	C		n.21025589G>C		TF_binding_site_variant	LOW	64	0	0.016	93	17	0.228	3.99921
Aplan-CEM-ATC25-C1_vs_Aplan-CEM-PreTreatment	chr14	21492831	21492831	C	A	TOX4	c.1215C>A	p.Thr405Thr	synonymous_variant	LOW	52	0	0.02	96	27	0.285	5.60034
Aplan-CEM-ATC25-C1_vs_Aplan-CEM-PreTreatment	chr14	22981407	22981407	G	A	AJUBA	c.860C>T	p.Thr287Met	missense_variant	MODERATE	99	0	0.011	108	28	0.281	5.94345
Aplan-CEM-ATC25-C1_vs_Aplan-CEM-PreTreatment	chr14	22981622	22981622	G	T	AJUBA	c.645C>A	p.Tyr215*	stop_gained	HIGH	87	0	0.012	125	28	0.221	6.45426
Aplan-CEM-ATC25-C1_vs_Aplan-CEM-PreTreatment	chr14	23347594	23347594	C	G	SLC22A17	c.1415G>C	p.Arg472Pro	missense_variant	MODERATE	75	0	0.015	104	22	0.208	5.55105
Aplan-CEM-ATC25-C1_vs_Aplan-CEM-PreTreatment	chr14	24114839	24114839	C	T	DCAF11	c.-668C>T		5_prime_UTR_premature_start_codon_gain_variant	LOW	78	0	0.016	94	19	0.238	5.18835
Aplan-CEM-ATC25-C1_vs_Aplan-CEM-PreTreatment	chr14	24123030	24123030	C	G	DCAF11	c.1459C>G	p.Arg487Gly	missense_variant	MODERATE	57	0	0.019	84	20	0.25	4.90948
Aplan-CEM-ATC25-C1_vs_Aplan-CEM-PreTreatment	chr14	24155602	24155602	G	C	RNF31	c.2404-1G>C		splice_acceptor_variant&intron_variant	HIGH	37	0	0.03	66	14	0.216	2.75576
Aplan-CEM-ATC25-C1_vs_Aplan-CEM-PreTreatment	chr14	24157911	24157911	C	T	RNF31	c.2741C>T	p.Pro914Leu	missense_variant	MODERATE	29	0	0.038	43	11	0.275	2.65765
Aplan-CEM-ATC25-C1_vs_Aplan-CEM-PreTreatment	chr14	24157915	24157915	C	A	RNF31	c.2745C>A	p.Asn915Lys	missense_variant	MODERATE	30	0	0.036	43	11	0.275	2.7001
Aplan-CEM-ATC25-C1_vs_Aplan-CEM-PreTreatment	chr14	24267683	24267683	G	C	RABGGTA	c.1330C>G	p.Arg444Gly	missense_variant	MODERATE	36	0	0.031	60	15	0.277	3.11514
Aplan-CEM-ATC25-C1_vs_Aplan-CEM-PreTreatment	chr14	24268383	24268383	G	T	RABGGTA	c.1044C>A	p.Asp348Glu	missense_variant	MODERATE	52	0	0.02	69	19	0.279	4.83688
Aplan-CEM-ATC25-C1_vs_Aplan-CEM-PreTreatment	chr14	24296591	24296591	G	C	DHRS1	c.295-3C>G		splice_region_variant&intron_variant	LOW	48	0	0.022	52	19	0.384	6.1777
Aplan-CEM-ATC25-C1_vs_Aplan-CEM-PreTreatment	chr14	24316111	24316111	G	A	LTB4R	c.460G>A	p.Ala154Thr	missense_variant	MODERATE	72	0	0.014	68	17	0.238	5.84085
Aplan-CEM-ATC25-C1_vs_Aplan-CEM-PreTreatment	chr14	24376799	24376799	G	C	NFATC4	c.2751G>C	p.Pro917Pro	synonymous_variant	LOW	108	0	0.009894	115	30	0.255	6.21502
Aplan-CEM-ATC25-C1_vs_Aplan-CEM-PreTreatment	chr14	33801043	33801043	G	A	NPAS3	c.2751G>A	p.Thr917Thr	synonymous_variant	LOW	49	0	0.021	94	29	0.309	5.92201
Aplan-CEM-ATC25-C1_vs_Aplan-CEM-PreTreatment	chr14	35116728	35116729	CT	C	PPP2R3C	c.67delA	p.Ser23fs	frameshift_variant	HIGH	23	0	0.043	28	20	0.668	6.68329
Aplan-CEM-ATC25-C1_vs_Aplan-CEM-PreTreatment	chr14	35725063	35725064	AT	A	RALGAPA1	c.1826delA	p.Asn609fs	frameshift_variant	HIGH	25	0	0.039	47	25	0.546	5.95787
Aplan-CEM-ATC25-C1_vs_Aplan-CEM-PreTreatment	chr14	37682927	37682927	C	T	TTC6	c.1220C>T	p.Thr407Ile	missense_variant	MODERATE	31	0	0.033	44	11	0.285	2.70302
Aplan-CEM-ATC25-C1_vs_Aplan-CEM-PreTreatment	chr14	41887820	41887820	A	G	LRFN5	c.1195A>G	p.Thr399Ala	missense_variant	MODERATE	46	0	0.025	79	14	0.205	2.70299
Aplan-CEM-ATC25-C1_vs_Aplan-CEM-PreTreatment	chr14	44945186	44945186	C	T	KLHL28	c.785G>A	p.Arg262His	missense_variant	MODERATE	37	0	0.026	38	15	0.389	4.96286
Aplan-CEM-ATC25-C1_vs_Aplan-CEM-PreTreatment	chr14	49851824	49851824	G	C	NEMF	c.111C>G	p.Tyr37*	stop_gained	HIGH	27	0	0.038	26	9	0.363	3.15177
Aplan-CEM-ATC25-C1_vs_Aplan-CEM-PreTreatment	chr14	50118856	50118856	C	CA	SOS2	c.3490-4dupT		splice_region_variant&intron_variant	LOW	30	0	0.035	34	18	0.528	5.75289
Aplan-CEM-ATC25-C1_vs_Aplan-CEM-PreTreatment	chr14	50182467	50182467	G	A	SOS2	c.854C>T	p.Ala285Val	missense_variant	MODERATE	19	0	0.05	34	14	0.414	3.10829
Aplan-CEM-ATC25-C1_vs_Aplan-CEM-PreTreatment	chr14	52268573	52268573	G	T	PTGDR	c.759G>T	p.Ala253Ala	synonymous_variant	LOW	64	0	0.018	88	19	0.237	4.69837
Aplan-CEM-ATC25-C1_vs_Aplan-CEM-PreTreatment	chr14	53152302	53152302	A	G	DDHD1	c.797T>C	p.Val266Ala	missense_variant	MODERATE	72	0	0.015	85	18	0.225	4.89967
Aplan-CEM-ATC25-C1_vs_Aplan-CEM-PreTreatment	chr14	54531034	54531034	G	A	CGRRF1	c.554G>A	p.Arg185Gln	missense_variant	MODERATE	16	0	0.064	28	16	0.565	4.11061
Aplan-CEM-ATC25-C1_vs_Aplan-CEM-PreTreatment	chr14	58407409	58407409	C	G	TOMM20L	c.346C>G	p.His116Asp	missense_variant	MODERATE	35	0	0.031	52	12	0.234	2.88921
Aplan-CEM-ATC25-C1_vs_Aplan-CEM-PreTreatment	chr14	58646743	58646743	C	A	DACT1	c.2120C>A	p.Ala707Glu	missense_variant	MODERATE	81	0	0.013	102	26	0.252	6.13211
Aplan-CEM-ATC25-C1_vs_Aplan-CEM-PreTreatment	chr14	59368791	59368791	C	G	DAAM1	c.3169C>G	p.Arg1057Gly	missense_variant	MODERATE	65	0	0.019	97	25	0.274	5.67964
Aplan-CEM-ATC25-C1_vs_Aplan-CEM-PreTreatment	chr14	59464274	59464274	G	C	GPR135	c.953C>G	p.Ala318Gly	missense_variant	MODERATE	68	0	0.017	74	22	0.29	6.30066
Aplan-CEM-ATC25-C1_vs_Aplan-CEM-PreTreatment	chr14	61547816	61547817	CT	C	PRKCH	c.1842delT	p.Phe614fs	frameshift_variant	HIGH	54	0	0.022	82	33	0.371	6.58083
Aplan-CEM-ATC25-C1_vs_Aplan-CEM-PreTreatment	chr14	61762594	61762594	T	C	SNAPC1	c.128+6T>C		splice_region_variant&intron_variant	LOW	37	0	0.028	43	17	0.386	5.36586
Aplan-CEM-ATC25-C1_vs_Aplan-CEM-PreTreatment	chr14	63204998	63204998	C	A	RHOJ	c.129C>A	p.Asn43Lys	missense_variant	MODERATE	51	0	0.022	72	18	0.229	4.45977
Aplan-CEM-ATC25-C1_vs_Aplan-CEM-PreTreatment	chr14	63727740	63727740	G	C	SGPP1	c.205C>G	p.Pro69Ala	missense_variant	MODERATE	52	0	0.021	68	15	0.242	3.92024
Aplan-CEM-ATC25-C1_vs_Aplan-CEM-PreTreatment	chr14	64730854	64730854	C	A	PLEKHG3	c.622C>A	p.Arg208Arg	synonymous_variant	LOW	32	0	0.033	41	9	0.243	2.4092
Aplan-CEM-ATC25-C1_vs_Aplan-CEM-PreTreatment	chr14	64774487	64774487	C	G	SPTB	c.4883G>C	p.Arg1628Pro	missense_variant	MODERATE	35	0	0.03	84	21	0.246	3.41337
Aplan-CEM-ATC25-C1_vs_Aplan-CEM-PreTreatment	chr14	67397721	67397721	G	C	PLEK2	c.148C>G	p.Arg50Gly	missense_variant	MODERATE	29	0	0.036	46	12	0.275	2.62968
Aplan-CEM-ATC25-C1_vs_Aplan-CEM-PreTreatment	chr14	67727091	67727091	G	A	RDH12	c.559G>A	p.Asp187Asn	missense_variant	MODERATE	64	0	0.018	69	35	0.491	6.50979
Aplan-CEM-ATC25-C1_vs_Aplan-CEM-PreTreatment	chr14	67793694	67793694	T	C	ZFYVE26	c.2467A>G	p.Ser823Gly	missense_variant	MODERATE	46	0	0.025	91	22	0.263	4.02084
Aplan-CEM-ATC25-C1_vs_Aplan-CEM-PreTreatment	chr14	69055504	69055504	C	T	DCAF5	c.1182G>A	p.Leu394Leu	synonymous_variant	LOW	65	0	0.017	87	48	0.541	5.90684
Aplan-CEM-ATC25-C1_vs_Aplan-CEM-PreTreatment	chr14	69573162	69573162	C	A	CCDC177	c.461G>T	p.Arg154Leu	missense_variant	MODERATE	21	0	0.047	66	17	0.246	2.03982
Aplan-CEM-ATC25-C1_vs_Aplan-CEM-PreTreatment	chr14	70457695	70457695	C	A	ADAM21	c.196C>A	p.Arg66Arg	synonymous_variant	LOW	72	0	0.015	124	27	0.24	5.76432
Aplan-CEM-ATC25-C1_vs_Aplan-CEM-PreTreatment	chr14	74260631	74260631	G	C	VSX2	c.798G>C	p.Ser266Ser	synonymous_variant	LOW	58	0	0.02	78	14	0.201	3.52121
Aplan-CEM-ATC25-C1_vs_Aplan-CEM-PreTreatment	chr14	74357728	74357728	C	G	VRTN	c.945C>G	p.Ser315Ser	synonymous_variant	LOW	84	0	0.013	131	38	0.286	6.1938
Aplan-CEM-ATC25-C1_vs_Aplan-CEM-PreTreatment	chr14	75030563	75030563	C	T	MLH3	c.3967G>A	p.Val1323Met	missense_variant	MODERATE	33	0	0.032	59	11	0.207	2.18445
Aplan-CEM-ATC25-C1_vs_Aplan-CEM-PreTreatment	chr14	76809553	76809553	G	C	ANGEL1	c.155C>G	p.Pro52Arg	missense_variant	MODERATE	59	0	0.019	80	21	0.296	5.43533
Aplan-CEM-ATC25-C1_vs_Aplan-CEM-PreTreatment	chr14	77027301	77027304	CGCA	C	IRF2BPL	c.489_491delTGC	p.Ala164del	disruptive_inframe_deletion	MODERATE	59	0	0.017	86	24	0.27	5.94809
Aplan-CEM-ATC25-C1_vs_Aplan-CEM-PreTreatment	chr14	77341941	77341941	G	C	TMED8	c.808C>G	p.Arg270Gly	missense_variant	MODERATE	43	0	0.025	63	15	0.267	3.51371
Aplan-CEM-ATC25-C1_vs_Aplan-CEM-PreTreatment	chr14	77859125	77859125	G	C	ADCK1	c.269G>C	p.Arg90Pro	missense_variant	MODERATE	40	0	0.026	56	12	0.239	2.95465
Aplan-CEM-ATC25-C1_vs_Aplan-CEM-PreTreatment	chr14	88626990	88626990	G	A	EML5	c.4588C>T	p.Arg1530*	stop_gained	HIGH	44	0	0.027	58	13	0.234	3.32447
Aplan-CEM-ATC25-C1_vs_Aplan-CEM-PreTreatment	chr14	90043057	90043058	GT	G	TDP1	c.1754-8delT		splice_region_variant&intron_variant	LOW	32	0	0.029	60	12	0.232	2.16501
Aplan-CEM-ATC25-C1_vs_Aplan-CEM-PreTreatment	chr14	91234047	91234047	C	G	GPR68	c.1004G>C	p.Gly335Ala	missense_variant	MODERATE	31	0	0.033	61	12	0.204	2.15246
Aplan-CEM-ATC25-C1_vs_Aplan-CEM-PreTreatment	chr14	91234315	91234315	C	G	GPR68	c.736G>C	p.Val246Leu	missense_variant	MODERATE	37	0	0.03	58	15	0.28	3.48651
Aplan-CEM-ATC25-C1_vs_Aplan-CEM-PreTreatment	chr14	91234386	91234386	C	G	GPR68	c.665G>C	p.Arg222Pro	missense_variant	MODERATE	33	0	0.032	65	19	0.272	3.64008
Aplan-CEM-ATC25-C1_vs_Aplan-CEM-PreTreatment	chr14	91234636	91234636	C	G	GPR68	c.415G>C	p.Val139Leu	missense_variant	MODERATE	57	0	0.02	85	21	0.257	4.93052
Aplan-CEM-ATC25-C1_vs_Aplan-CEM-PreTreatment	chr14	91234883	91234883	C	G	GPR68	c.168G>C	p.Leu56Leu	synonymous_variant	LOW	52	0	0.02	50	14	0.289	4.80208
Aplan-CEM-ATC25-C1_vs_Aplan-CEM-PreTreatment	chr14	91234893	91234893	C	G	GPR68	c.158G>C	p.Arg53Pro	missense_variant	MODERATE	54	0	0.02	50	13	0.267	4.53748
Aplan-CEM-ATC25-C1_vs_Aplan-CEM-PreTreatment	chr14	91234985	91234985	C	T	GPR68	c.66G>A	p.Thr22Thr	synonymous_variant	LOW	45	0	0.023	46	14	0.263	4.41933
Aplan-CEM-ATC25-C1_vs_Aplan-CEM-PreTreatment	chr14	91299935	91299935	C	G	CCDC88C	c.3771G>C	p.Glu1257Asp	missense_variant	MODERATE	54	0	0.021	73	18	0.278	4.4563
Aplan-CEM-ATC25-C1_vs_Aplan-CEM-PreTreatment	chr14	92449094	92449094	C	G	SLC24A4	c.758C>G	p.Ala253Gly	missense_variant	MODERATE	39	0	0.028	56	15	0.288	3.57112
Aplan-CEM-ATC25-C1_vs_Aplan-CEM-PreTreatment	chr14	92833275	92833275	C	G	GOLGA5	c.1873C>G	p.Gln625Glu	missense_variant	MODERATE	28	0	0.037	40	12	0.316	3.05093
Aplan-CEM-ATC25-C1_vs_Aplan-CEM-PreTreatment	chr14	94614748	94614748	C	T	SERPINA3	c.307C>T	p.Leu103Phe	missense_variant	MODERATE	61	0	0.018	80	43	0.493	6.00691
Aplan-CEM-ATC25-C1_vs_Aplan-CEM-PreTreatment	chr14	95111355	95111355	G	C	DICER1	c.2218C>G	p.Pro740Ala	missense_variant	MODERATE	48	0	0.024	64	27	0.441	6.10282
Aplan-CEM-ATC25-C1_vs_Aplan-CEM-PreTreatment	chr14	96289751	96289751	G	C	ATG2B	c.5911C>G	p.Pro1971Ala	missense_variant	MODERATE	40	0	0.028	61	14	0.254	3.18513
Aplan-CEM-ATC25-C1_vs_Aplan-CEM-PreTreatment	chr14	96332580	96332580	G	A	ATG2B	c.1283C>T	p.Pro428Leu	missense_variant	MODERATE	47	0	0.025	47	12	0.268	3.65988
Aplan-CEM-ATC25-C1_vs_Aplan-CEM-PreTreatment	chr14	99603443	99603443	C	G	CCDC85C	c.517G>C	p.Gly173Arg	missense_variant	MODERATE	34	0	0.028	57	12	0.23	2.52892
Aplan-CEM-ATC25-C1_vs_Aplan-CEM-PreTreatment	chr14	100277522	100277522	T	C	YY1	c.1167T>C	p.Gly389Gly	synonymous_variant	LOW	73	0	0.016	105	29	0.289	5.77455
Aplan-CEM-ATC25-C1_vs_Aplan-CEM-PreTreatment	chr14	100277544	100277544	T	C	YY1	c.1189T>C	p.Ser397Pro	missense_variant	MODERATE	75	0	0.016	105	27	0.286	6.1137
Aplan-CEM-ATC25-C1_vs_Aplan-CEM-PreTreatment	chr14	100529876	100529876	G	C	WDR25	c.1470G>C	p.Thr490Thr	synonymous_variant	LOW	94	0	0.012	115	22	0.201	6.0459
Aplan-CEM-ATC25-C1_vs_Aplan-CEM-PreTreatment	chr14	102022867	102022867	A	G	DYNC1H1	c.8624A>G	p.Asn2875Ser	missense_variant	MODERATE	97	0	0.012	126	46	0.349	5.79422
Aplan-CEM-ATC25-C1_vs_Aplan-CEM-PreTreatment	chr14	103965520	103965520	G	C	TDRD9	c.608G>C	p.Arg203Pro	missense_variant	MODERATE	85	0	0.013	124	31	0.235	5.7997
Aplan-CEM-ATC25-C1_vs_Aplan-CEM-PreTreatment	chr14	104085792	104085792	G	T	ASPG	c.22G>T	p.Glu8*	stop_gained	HIGH	43	0	0.026	62	16	0.264	3.86098
Aplan-CEM-ATC25-C1_vs_Aplan-CEM-PreTreatment	chr14	104095613	104095613	T	C	ASPG	c.386T>C	p.Met129Thr	missense_variant	MODERATE	55	0	0.019	119	43	0.364	5.96329
Aplan-CEM-ATC25-C1_vs_Aplan-CEM-PreTreatment	chr14	104953931	104953931	C	A	AHNAK2	c.1520G>T	p.Arg507Leu	missense_variant	MODERATE	146	1	0.007444	220	54	0.228	6.07081
Aplan-CEM-ATC25-C1_vs_Aplan-CEM-PreTreatment	chr15	24676761	24676761	C	G	NPAP1	c.894C>G	p.Ser298Ser	synonymous_variant	LOW	54	0	0.021	80	24	0.299	5.98876
Aplan-CEM-ATC25-C1_vs_Aplan-CEM-PreTreatment	chr15	33473483	33473483	C	G	RYR3	c.116C>G	p.Ala39Gly	missense_variant	MODERATE	37	0	0.03	30	12	0.4	4.84095
Aplan-CEM-ATC25-C1_vs_Aplan-CEM-PreTreatment	chr15	33649222	33649222	C	T	RYR3	c.4129C>T	p.Arg1377Trp	missense_variant	MODERATE	38	0	0.031	33	20	0.598	6.53821
Aplan-CEM-ATC25-C1_vs_Aplan-CEM-PreTreatment	chr15	38351536	38351536	C	G	SPRED1	c.1207C>G	p.Arg403Gly	missense_variant	MODERATE	63	0	0.018	89	28	0.321	6.74107
Aplan-CEM-ATC25-C1_vs_Aplan-CEM-PreTreatment	chr15	38559915	38559915	G	T	RASGRP1	c.279C>A	p.Ala93Ala	synonymous_variant	LOW	26	0	0.04	40	11	0.302	2.62757
Aplan-CEM-ATC25-C1_vs_Aplan-CEM-PreTreatment	chr15	40624380	40624380	A	C	KNL1	c.4194A>C	p.Gln1398His	missense_variant	MODERATE	46	0	0.022	57	23	0.415	6.50195
Aplan-CEM-ATC25-C1_vs_Aplan-CEM-PreTreatment	chr15	40625506	40625506	C	G	KNL1	c.5320C>G	p.Pro1774Ala	missense_variant	MODERATE	33	0	0.032	33	8	0.257	2.31563
Aplan-CEM-ATC25-C1_vs_Aplan-CEM-PreTreatment	chr15	40899564	40899564	C	G	VPS18	c.746C>G	p.Ala249Gly	missense_variant	MODERATE	116	0	0.009511	106	33	0.317	6.14694
Aplan-CEM-ATC25-C1_vs_Aplan-CEM-PreTreatment	chr15	40900903	40900903	C	A	VPS18	c.2085C>A	p.Tyr695*	stop_gained	HIGH	65	0	0.017	76	22	0.334	6.40204
Aplan-CEM-ATC25-C1_vs_Aplan-CEM-PreTreatment	chr15	40900917	40900917	C	G	VPS18	c.2099C>G	p.Ala700Gly	missense_variant	MODERATE	61	0	0.018	74	19	0.29	5.31685
Aplan-CEM-ATC25-C1_vs_Aplan-CEM-PreTreatment	chr15	40935009	40935009	C	G	DLL4	c.1132C>G	p.Arg378Gly	missense_variant	MODERATE	70	0	0.017	69	26	0.368	5.86586
Aplan-CEM-ATC25-C1_vs_Aplan-CEM-PreTreatment	chr15	40936257	40936257	C	G	DLL4	c.1270C>G	p.Arg424Gly	missense_variant	MODERATE	34	0	0.028	43	13	0.313	3.47829
Aplan-CEM-ATC25-C1_vs_Aplan-CEM-PreTreatment	chr15	41396950	41396950	C	T	NDUFAF1	c.110G>A	p.Ser37Asn	missense_variant	MODERATE	48	0	0.022	76	53	0.693	6.11524
Aplan-CEM-ATC25-C1_vs_Aplan-CEM-PreTreatment	chr15	41984553	41984553	C	G	PLA2G4E	c.2269G>C	p.Asp757His	missense_variant	MODERATE	46	0	0.026	44	10	0.275	3.36277
Aplan-CEM-ATC25-C1_vs_Aplan-CEM-PreTreatment	chr15	42087359	42087359	C	G	PLA2G4D	c.196G>C	p.Asp66His	missense_variant	MODERATE	65	0	0.018	58	17	0.326	6.17841
Aplan-CEM-ATC25-C1_vs_Aplan-CEM-PreTreatment	chr15	42163682	42163682	A	G	VPS39	c.2106T>C	p.His702His	synonymous_variant	LOW	33	0	0.034	37	13	0.375	4.05984
Aplan-CEM-ATC25-C1_vs_Aplan-CEM-PreTreatment	chr15	42442372	42442372	C	G	ZNF106	c.3395G>C	p.Ser1132Thr	missense_variant	MODERATE	52	0	0.022	59	19	0.353	5.46527
Aplan-CEM-ATC25-C1_vs_Aplan-CEM-PreTreatment	chr15	42685668	42685668	C	T	STARD9	c.4090C>T	p.Gln1364*	stop_gained	HIGH	61	0	0.018	75	22	0.285	5.73785
Aplan-CEM-ATC25-C1_vs_Aplan-CEM-PreTreatment	chr15	43527824	43527824	G	A	MAP1A	c.7065G>A	p.Gln2355Gln	synonymous_variant	LOW	64	0	0.016	56	20	0.387	5.79181
Aplan-CEM-ATC25-C1_vs_Aplan-CEM-PreTreatment	chr15	44569504	44569504	A	G	SPG11	c.6479T>C	p.Val2160Ala	missense_variant&splice_region_variant	MODERATE	14	0	0.067	16	10	0.572	3.5231
Aplan-CEM-ATC25-C1_vs_Aplan-CEM-PreTreatment	chr15	45171925	45171925	C	A	SHF	c.1043G>T	p.Arg348Leu	missense_variant	MODERATE	53	0	0.021	62	21	0.309	6.2262
Aplan-CEM-ATC25-C1_vs_Aplan-CEM-PreTreatment	chr15	48962750	48962751	CG	C	SHC4	c.265delC	p.Arg89fs	frameshift_variant	HIGH	75	0	0.015	70	19	0.295	5.90097
Aplan-CEM-ATC25-C1_vs_Aplan-CEM-PreTreatment	chr15	49028493	49028493	G	A	SECISBP2L	c.854C>T	p.Ala285Val	missense_variant	MODERATE	51	0	0.021	45	18	0.381	6.90153
Aplan-CEM-ATC25-C1_vs_Aplan-CEM-PreTreatment	chr15	52264231	52264232	CA	GG	MYO5C	c.1005_1006delTGinsCC	p.Val336Leu	missense_variant	MODERATE	39	0	0.03	33	10	0.307	3.76291
Aplan-CEM-ATC25-C1_vs_Aplan-CEM-PreTreatment	chr15	56654505	56654506	TA	T	ZNF280D	c.2058-3delT		splice_region_variant&intron_variant	LOW	27	1	0.071	55	45	0.807	6.75621
Aplan-CEM-ATC25-C1_vs_Aplan-CEM-PreTreatment	chr15	58538516	58538516	C	A	LIPC	c.272C>A	p.Ser91*	stop_gained&splice_region_variant	HIGH	34	0	0.034	37	13	0.323	4.11192
Aplan-CEM-ATC25-C1_vs_Aplan-CEM-PreTreatment	chr15	58541843	58541843	C	G	LIPC	c.332C>G	p.Pro111Arg	missense_variant	MODERATE	65	0	0.018	66	20	0.283	6.45675
Aplan-CEM-ATC25-C1_vs_Aplan-CEM-PreTreatment	chr15	58541892	58541892	C	G	LIPC	c.381C>G	p.His127Gln	missense_variant	MODERATE	67	0	0.019	66	20	0.316	6.44374
Aplan-CEM-ATC25-C1_vs_Aplan-CEM-PreTreatment	chr15	58548489	58548489	C	A	LIPC	c.968C>A	p.Thr323Lys	missense_variant	MODERATE	44	0	0.025	47	19	0.452	6.33554
Aplan-CEM-ATC25-C1_vs_Aplan-CEM-PreTreatment	chr15	58771884	58771884	C	G	FAM63B	c.489C>G	p.Asp163Glu	missense_variant	MODERATE	78	0	0.014	86	23	0.302	6.58901
Aplan-CEM-ATC25-C1_vs_Aplan-CEM-PreTreatment	chr15	60005547	60005547	C	G	FOXB1	c.584C>G	p.Pro195Arg	missense_variant	MODERATE	70	0	0.015	58	16	0.311	6.06721
Aplan-CEM-ATC25-C1_vs_Aplan-CEM-PreTreatment	chr15	62647413	62647413	C	G	TLN2	c.103C>G	p.Arg35Gly	missense_variant	MODERATE	61	0	0.02	69	22	0.333	6.47617
Aplan-CEM-ATC25-C1_vs_Aplan-CEM-PreTreatment	chr15	63141277	63141277	T	C	LACTB	c.1119-3T>C		splice_region_variant&intron_variant	LOW	38	0	0.027	53	15	0.286	3.90793
Aplan-CEM-ATC25-C1_vs_Aplan-CEM-PreTreatment	chr15	64381366	64381366	C	G	KIAA0101	c.6G>C	p.Val2Val	synonymous_variant	LOW	41	0	0.028	52	19	0.35	5.51851
Aplan-CEM-ATC25-C1_vs_Aplan-CEM-PreTreatment	chr15	64395492	64395492	C	G	TRIP4	c.366C>G	p.Asp122Glu	missense_variant	MODERATE	51	0	0.024	43	10	0.263	3.67353
Aplan-CEM-ATC25-C1_vs_Aplan-CEM-PreTreatment	chr15	64400740	64400740	C	G	TRIP4	c.619-3C>G		splice_region_variant&intron_variant	LOW	23	0	0.048	28	8	0.28	2.24787
Aplan-CEM-ATC25-C1_vs_Aplan-CEM-PreTreatment	chr15	64424057	64424057	C	G	TRIP4	c.1385C>G	p.Pro462Arg	missense_variant	MODERATE	38	0	0.033	44	10	0.277	2.85986
Aplan-CEM-ATC25-C1_vs_Aplan-CEM-PreTreatment	chr15	64424061	64424061	C	G	TRIP4	c.1389C>G	p.His463Gln	missense_variant	MODERATE	38	0	0.033	44	10	0.282	2.85986
Aplan-CEM-ATC25-C1_vs_Aplan-CEM-PreTreatment	chr15	64425617	64425617	C	G	TRIP4	c.1561C>G	p.Gln521Glu	missense_variant	MODERATE	30	0	0.038	27	12	0.4	4.60945
Aplan-CEM-ATC25-C1_vs_Aplan-CEM-PreTreatment	chr15	64823876	64823876	G	T	PIF1	c.460C>A	p.Gln154Lys	missense_variant	MODERATE	55	0	0.019	33	16	0.452	6.39569
Aplan-CEM-ATC25-C1_vs_Aplan-CEM-PreTreatment	chr15	64848733	64848733	T	G	PLEKHO2	c.153T>G	p.Tyr51*	stop_gained	HIGH	57	0	0.019	54	15	0.304	5.19614
Aplan-CEM-ATC25-C1_vs_Aplan-CEM-PreTreatment	chr15	65054960	65054960	C	G	RASL12	c.740G>C	p.Arg247Pro	missense_variant	MODERATE	84	0	0.013	78	18	0.254	6.21165
Aplan-CEM-ATC25-C1_vs_Aplan-CEM-PreTreatment	chr15	66318481	66318481	C	T	DIS3L	c.1027C>T	p.Arg343Trp	missense_variant	MODERATE	56	0	0.02	52	32	0.632	5.79975
Aplan-CEM-ATC25-C1_vs_Aplan-CEM-PreTreatment	chr15	68153653	68153653	C	G	PIAS1	c.898C>G	p.Arg300Gly	missense_variant	MODERATE	15	0	0.077	12	8	0.636	3.65176
Aplan-CEM-ATC25-C1_vs_Aplan-CEM-PreTreatment	chr15	71215148	71215148	C	G	THSD4	c.213C>G	p.Gly71Gly	synonymous_variant	LOW	27	0	0.037	64	20	0.327	3.28723
Aplan-CEM-ATC25-C1_vs_Aplan-CEM-PreTreatment	chr15	71813622	71813622	C	G	NR2E3	c.981C>G	p.Val327Val	synonymous_variant	LOW	43	0	0.025	59	16	0.28	4.20276
Aplan-CEM-ATC25-C1_vs_Aplan-CEM-PreTreatment	chr15	73367895	73367895	C	G	HCN4	c.376G>C	p.Ala126Pro	missense_variant	MODERATE	30	0	0.037	50	19	0.341	4.54029
Aplan-CEM-ATC25-C1_vs_Aplan-CEM-PreTreatment	chr15	73985501	73985501	C	G	STOML1	c.607G>C	p.Asp203His	missense_variant	MODERATE	65	0	0.017	49	17	0.326	7.05837
Aplan-CEM-ATC25-C1_vs_Aplan-CEM-PreTreatment	chr15	74044424	74044424	C	G	PML	c.2065C>G	p.Arg689Gly	missense_variant	MODERATE	70	0	0.016	62	18	0.303	6.5698
Aplan-CEM-ATC25-C1_vs_Aplan-CEM-PreTreatment	chr15	74133596	74133596	T	C	ISLR2	c.842T>C	p.Val281Ala	missense_variant	MODERATE	81	0	0.013	73	22	0.285	6.28471
Aplan-CEM-ATC25-C1_vs_Aplan-CEM-PreTreatment	chr15	74720987	74720987	C	G	CYP1A1	c.1233G>C	p.Q411H	structural_interaction_variant	HIGH	36	0	0.029	52	19	0.369	5.00423
Aplan-CEM-ATC25-C1_vs_Aplan-CEM-PreTreatment	chr15	74751816	74751816	C	G	CYP1A2	c.1004C>G	p.Thr335Ser	missense_variant	MODERATE	35	0	0.032	42	12	0.323	3.48997
Aplan-CEM-ATC25-C1_vs_Aplan-CEM-PreTreatment	chr15	74819211	74819211	G	T	LMAN1L	c.657G>T	p.Gly219Gly	synonymous_variant	LOW	52	0	0.023	73	14	0.213	3.4671
Aplan-CEM-ATC25-C1_vs_Aplan-CEM-PreTreatment	chr15	74820720	74820720	C	G	LMAN1L	c.860C>G	p.Thr287Ser	missense_variant	MODERATE	67	0	0.017	50	17	0.4	7.08439
Aplan-CEM-ATC25-C1_vs_Aplan-CEM-PreTreatment	chr15	75044465	75044465	A	C	PPCDC	c.311A>C	p.D104A	structural_interaction_variant	HIGH	62	0	0.019	36	20	0.6	5.99912
Aplan-CEM-ATC25-C1_vs_Aplan-CEM-PreTreatment	chr15	75208030	75208030	C	A	C15orf39	c.1982C>A	p.Pro661His	missense_variant	MODERATE	120	0	0.009253	131	61	0.469	5.77641
Aplan-CEM-ATC25-C1_vs_Aplan-CEM-PreTreatment	chr15	75689513	75689513	G	A	CSPG4	c.1552C>T	p.Leu518Leu	synonymous_variant	LOW	82	0	0.013	77	30	0.38	6.55453
Aplan-CEM-ATC25-C1_vs_Aplan-CEM-PreTreatment	chr15	76665684	76665685	CT	C	SCAPER	c.2613delA	p.Ala872fs	frameshift_variant	HIGH	30	0	0.036	65	28	0.43	5.37988
Aplan-CEM-ATC25-C1_vs_Aplan-CEM-PreTreatment	chr15	78546675	78546675	T	C	PSMA4	c.608T>C	p.Val203Ala	missense_variant	MODERATE	36	0	0.034	36	25	0.678	6.70614
Aplan-CEM-ATC25-C1_vs_Aplan-CEM-PreTreatment	chr15	78589917	78589917	T	C	CHRNA5	c.526T>C	p.Phe176Leu	missense_variant	MODERATE	53	0	0.021	59	15	0.284	4.53168
Aplan-CEM-ATC25-C1_vs_Aplan-CEM-PreTreatment	chr15	78629133	78629133	T	C	CHRNB4	c.1172A>G	p.Asn391Ser	missense_variant	MODERATE	81	0	0.013	83	26	0.319	6.10774
Aplan-CEM-ATC25-C1_vs_Aplan-CEM-PreTreatment	chr15	78798050	78798050	G	C	ADAMTS7	c.520C>G	p.Arg174Gly	missense_variant	MODERATE	54	0	0.02	47	11	0.262	3.96026
Aplan-CEM-ATC25-C1_vs_Aplan-CEM-PreTreatment	chr15	79003851	79003851	G	A	RASGRF1	c.2448C>T	p.Gly816Gly	synonymous_variant	LOW	59	0	0.018	50	34	0.701	6.01321
Aplan-CEM-ATC25-C1_vs_Aplan-CEM-PreTreatment	chr15	81332592	81332592	C	G	TMC3	c.3133G>C	p.Val1045Leu	missense_variant	MODERATE	57	0	0.02	67	27	0.422	6.42427
Aplan-CEM-ATC25-C1_vs_Aplan-CEM-PreTreatment	chr15	84621360	84621360	C	T	ZSCAN2	c.1165C>T	p.Pro389Ser	missense_variant	MODERATE	108	0	0.01	103	34	0.33	5.91086
Aplan-CEM-ATC25-C1_vs_Aplan-CEM-PreTreatment	chr15	84784009	84784009	C	G	ZNF592	c.1334C>G	p.Ala445Gly	missense_variant	MODERATE	85	0	0.012	81	27	0.329	5.9583
Aplan-CEM-ATC25-C1_vs_Aplan-CEM-PreTreatment	chr15	84817147	84817147	G	C	ALPK3	c.301G>C	p.Gly101Arg	missense_variant	MODERATE	62	0	0.018	49	15	0.289	5.93593
Aplan-CEM-ATC25-C1_vs_Aplan-CEM-PreTreatment	chr15	84817350	84817350	G	C	ALPK3	c.504G>C	p.Pro168Pro	synonymous_variant	LOW	30	0	0.034	34	9	0.258	2.61547
Aplan-CEM-ATC25-C1_vs_Aplan-CEM-PreTreatment	chr15	85743785	85743786	GA	G	AKAP13	c.8372delA	p.Lys2791fs	frameshift_variant	HIGH	58	0	0.017	61	45	0.724	5.85557
Aplan-CEM-ATC25-C1_vs_Aplan-CEM-PreTreatment	chr15	89210793	89210793	C	G	RLBP1	c.701G>C	p.Arg234Pro	missense_variant	MODERATE	25	0	0.043	25	7	0.293	2.01659
Aplan-CEM-ATC25-C1_vs_Aplan-CEM-PreTreatment	chr15	89319089	89319089	T	C	POLG	c.3115A>G	p.Lys1039Glu	missense_variant	MODERATE	50	0	0.021	45	34	0.744	6.41595
Aplan-CEM-ATC25-C1_vs_Aplan-CEM-PreTreatment	chr15	89776753	89776753	C	G	MESP2	c.396C>G	p.Ile132Met	missense_variant	MODERATE	87	0	0.013	102	26	0.287	6.12115
Aplan-CEM-ATC25-C1_vs_Aplan-CEM-PreTreatment	chr15	90073268	90073268	C	T	ZNF710	c.1650+6C>T		splice_region_variant&intron_variant	LOW	47	0	0.026	45	20	0.475	6.80997
Aplan-CEM-ATC25-C1_vs_Aplan-CEM-PreTreatment	chr15	90088397	90088397	C	G	IDH2	c.640G>C	p.Ala214Pro	missense_variant	MODERATE	48	0	0.023	60	17	0.321	4.71844
Aplan-CEM-ATC25-C1_vs_Aplan-CEM-PreTreatment	chr15	90091604	90091604	C	G	IDH2	c.156G>C	p.E52D	structural_interaction_variant	HIGH	26	0	0.043	27	12	0.444	3.99413
Aplan-CEM-ATC25-C1_vs_Aplan-CEM-PreTreatment	chr15	90361186	90361186	C	G	ZNF774	c.1355C>G	p.Thr452Arg	missense_variant	MODERATE	86	0	0.013	100	39	0.38	5.86046
Aplan-CEM-ATC25-C1_vs_Aplan-CEM-PreTreatment	chr15	90477709	90477709	C	G	IQGAP1	c.3149C>G	p.Thr1050Arg	missense_variant	MODERATE	25	0	0.043	31	12	0.414	3.29285
Aplan-CEM-ATC25-C1_vs_Aplan-CEM-PreTreatment	chr15	90483435	90483435	C	G	IQGAP1	c.3630C>G	p.Asp1210Glu	missense_variant	MODERATE	44	0	0.028	48	10	0.214	2.90267
Aplan-CEM-ATC25-C1_vs_Aplan-CEM-PreTreatment	chr15	91281856	91281856	A	C	SV2B	c.1502A>C	p.Asn501Thr	missense_variant	MODERATE	57	0	0.02	54	33	0.612	6.11717
Aplan-CEM-ATC25-C1_vs_Aplan-CEM-PreTreatment	chr15	96334484	96334484	G	C	NR2F2	c.851G>C	p.Arg284Pro	missense_variant	MODERATE	41	0	0.026	51	11	0.222	3.02466
Aplan-CEM-ATC25-C1_vs_Aplan-CEM-PreTreatment	chr15	99221863	99221863	T	C	TTC23	c.182A>G	p.Tyr61Cys	missense_variant&splice_region_variant	MODERATE	38	0	0.028	37	11	0.281	3.75808
Aplan-CEM-ATC25-C1_vs_Aplan-CEM-PreTreatment	chr15	100879980	100879980	C	G	ALDH1A3	c.73C>G	p.Arg25Gly	missense_variant	MODERATE	23	0	0.053	11	8	0.627	5.04154
Aplan-CEM-ATC25-C1_vs_Aplan-CEM-PreTreatment	chr16	47547	47547	G	T	POLR3K	c.210C>A	p.Pro70Pro	synonymous_variant	LOW	31	0	0.032	45	14	0.31	3.33726
Aplan-CEM-ATC25-C1_vs_Aplan-CEM-PreTreatment	chr16	62053	62053	C	G	RHBDF1	c.954-1G>C		splice_acceptor_variant&intron_variant	HIGH	62	0	0.018	80	17	0.214	4.51101
Aplan-CEM-ATC25-C1_vs_Aplan-CEM-PreTreatment	chr16	173163	173163	C	T	HBA2	c.134C>T	p.Pro45Leu	missense_variant	MODERATE	20	0	0.044	25	8	0.333	2.25165
Aplan-CEM-ATC25-C1_vs_Aplan-CEM-PreTreatment	chr16	274260	274260	C	T	RGS11	c.324G>A	p.Pro108Pro	synonymous_variant	LOW	46	0	0.024	59	18	0.269	5.0267
Aplan-CEM-ATC25-C1_vs_Aplan-CEM-PreTreatment	chr16	376632	376632	C	G	TMEM8A	c.816G>C	p.Pro272Pro	synonymous_variant	LOW	89	0	0.013	113	20	0.204	5.33255
Aplan-CEM-ATC25-C1_vs_Aplan-CEM-PreTreatment	chr16	377572	377572	C	A	TMEM8A	c.313G>T	p.Gly105Cys	missense_variant	MODERATE	70	0	0.016	95	23	0.274	5.97057
Aplan-CEM-ATC25-C1_vs_Aplan-CEM-PreTreatment	chr16	546888	546888	C	G	CAPN15	c.50C>G	p.Pro17Arg	missense_variant	MODERATE	58	0	0.02	77	17	0.232	4.46452
Aplan-CEM-ATC25-C1_vs_Aplan-CEM-PreTreatment	chr16	547837	547837	C	T	CAPN15	c.999C>T	p.Pro333Pro	synonymous_variant	LOW	75	0	0.014	96	22	0.267	5.64685
Aplan-CEM-ATC25-C1_vs_Aplan-CEM-PreTreatment	chr16	563739	563739	C	G	PRR35	c.445C>G	p.Arg149Gly	missense_variant	MODERATE	85	1	0.013	110	23	0.217	4.97074
Aplan-CEM-ATC25-C1_vs_Aplan-CEM-PreTreatment	chr16	574357	574357	C	G	PIGQ	c.283C>G	p.Arg95Gly	missense_variant	MODERATE	53	0	0.02	54	13	0.204	3.96808
Aplan-CEM-ATC25-C1_vs_Aplan-CEM-PreTreatment	chr16	574509	574509	C	G	PIGQ	c.435C>G	p.Thr145Thr	synonymous_variant	LOW	60	0	0.019	51	13	0.266	4.79975
Aplan-CEM-ATC25-C1_vs_Aplan-CEM-PreTreatment	chr16	575862	575862	C	G	PIGQ	c.713C>G	p.Ser238Cys	missense_variant	MODERATE	30	0	0.04	37	9	0.281	2.4889
Aplan-CEM-ATC25-C1_vs_Aplan-CEM-PreTreatment	chr16	575890	575890	C	G	PIGQ	c.741C>G	p.Cys247Trp	missense_variant	MODERATE	30	0	0.038	42	10	0.243	2.40662
Aplan-CEM-ATC25-C1_vs_Aplan-CEM-PreTreatment	chr16	666929	666929	T	C	WDR90	c.5035T>C	p.Phe1679Leu	missense_variant	MODERATE	73	0	0.015	105	49	0.452	6.01264
Aplan-CEM-ATC25-C1_vs_Aplan-CEM-PreTreatment	chr16	672336	672336	A	G	RHOT2	c.1278A>G	p.Gly426Gly	synonymous_variant	LOW	83	0	0.014	132	33	0.254	6.05393
Aplan-CEM-ATC25-C1_vs_Aplan-CEM-PreTreatment	chr16	792508	792508	G	A	CHTF18	c.1981G>A	p.Ala661Thr	missense_variant	MODERATE	71	0	0.015	105	48	0.458	6.12458
Aplan-CEM-ATC25-C1_vs_Aplan-CEM-PreTreatment	chr16	1207793	1207793	G	T	CACNA1H	c.3087G>T	p.Thr1029Thr	synonymous_variant	LOW	37	0	0.029	39	8	0.235	2.27488
Aplan-CEM-ATC25-C1_vs_Aplan-CEM-PreTreatment	chr16	1222297	1222297	C	G	TPSG1	c.556G>C	p.Val186Leu	missense_variant	MODERATE	62	0	0.019	78	20	0.277	5.55146
Aplan-CEM-ATC25-C1_vs_Aplan-CEM-PreTreatment	chr16	1223424	1223424	C	G	TPSG1	c.244G>C	p.Gly82Arg	missense_variant&splice_region_variant	MODERATE	46	0	0.025	73	31	0.403	6.126
Aplan-CEM-ATC25-C1_vs_Aplan-CEM-PreTreatment	chr16	1346640	1346640	G	A	BAIAP3	c.2703G>A	p.Lys901Lys	synonymous_variant	LOW	47	0	0.022	59	24	0.431	5.93057
Aplan-CEM-ATC25-C1_vs_Aplan-CEM-PreTreatment	chr16	1366356	1366356	G	C	UNKL	c.2086C>G	p.Arg696Gly	missense_variant	MODERATE	42	0	0.026	88	26	0.296	4.94304
Aplan-CEM-ATC25-C1_vs_Aplan-CEM-PreTreatment	chr16	1367744	1367744	C	G	UNKL	c.1700G>C	p.Gly567Ala	missense_variant	MODERATE	65	1	0.019	83	21	0.267	4.51961
Aplan-CEM-ATC25-C1_vs_Aplan-CEM-PreTreatment	chr16	1435097	1435097	C	G	CCDC154	c.1705G>C	p.Ala569Pro	missense_variant	MODERATE	38	0	0.03	46	11	0.256	3.10622
Aplan-CEM-ATC25-C1_vs_Aplan-CEM-PreTreatment	chr16	1442468	1442468	C	G	CCDC154	c.613G>C	p.Ala205Pro	missense_variant	MODERATE	47	0	0.024	71	23	0.344	5.73348
Aplan-CEM-ATC25-C1_vs_Aplan-CEM-PreTreatment	chr16	1443830	1443830	C	G	CCDC154	c.190G>C	p.Asp64His	missense_variant	MODERATE	50	0	0.023	67	23	0.328	6.31383
Aplan-CEM-ATC25-C1_vs_Aplan-CEM-PreTreatment	chr16	1443882	1443882	C	A	CCDC154	c.138G>T	p.Ser46Ser	synonymous_variant	LOW	43	0	0.028	48	17	0.341	5.39145
Aplan-CEM-ATC25-C1_vs_Aplan-CEM-PreTreatment	chr16	1447450	1447450	C	G	CLCN7	c.2120G>C	p.Arg707Pro	missense_variant	MODERATE	63	0	0.017	78	16	0.239	4.2501
Aplan-CEM-ATC25-C1_vs_Aplan-CEM-PreTreatment	chr16	1456143	1456143	C	G	CLCN7	c.814G>C	p.Gly272Arg	missense_variant	MODERATE	27	0	0.043	33	10	0.3	2.87303
Aplan-CEM-ATC25-C1_vs_Aplan-CEM-PreTreatment	chr16	1456190	1456190	C	G	CLCN7	c.767G>C	p.Arg256Pro	missense_variant	MODERATE	27	0	0.042	30	12	0.321	3.83308
Aplan-CEM-ATC25-C1_vs_Aplan-CEM-PreTreatment	chr16	1486339	1486339	G	A	PTX4	c.1037C>T	p.Ala346Val	missense_variant	MODERATE	107	0	0.011	103	27	0.247	6.30903
Aplan-CEM-ATC25-C1_vs_Aplan-CEM-PreTreatment	chr16	1502650	1502650	C	G	TELO2	c.1659C>G	p.Ser553Arg	missense_variant	MODERATE	42	0	0.025	48	18	0.383	5.69417
Aplan-CEM-ATC25-C1_vs_Aplan-CEM-PreTreatment	chr16	1586159	1586159	C	T	IFT140	c.1126G>A	p.Glu376Lys	missense_variant	MODERATE	54	0	0.021	63	18	0.298	5.06991
Aplan-CEM-ATC25-C1_vs_Aplan-CEM-PreTreatment	chr16	1587212	1587212	T	C	IFT140	c.995A>G	p.Tyr332Cys	missense_variant	MODERATE	15	0	0.071	35	16	0.467	3.03643
Aplan-CEM-ATC25-C1_vs_Aplan-CEM-PreTreatment	chr16	1977064	1977064	G	A	TBL3	c.1451G>A	p.Ser484Asn	missense_variant	MODERATE	49	0	0.022	83	43	0.529	6.04209
Aplan-CEM-ATC25-C1_vs_Aplan-CEM-PreTreatment	chr16	2002268	2002268	C	T	ZNF598	c.668G>A	p.Arg223His	missense_variant	MODERATE	48	0	0.023	101	25	0.244	4.54571
Aplan-CEM-ATC25-C1_vs_Aplan-CEM-PreTreatment	chr16	2076101	2076101	C	T	TSC2	c.2673C>T	p.His891His	synonymous_variant	LOW	59	0	0.017	85	23	0.269	5.61638
Aplan-CEM-ATC25-C1_vs_Aplan-CEM-PreTreatment	chr16	2114379	2114379	C	T	PKD1	c.2644G>A	p.Val882Met	missense_variant	MODERATE	52	0	0.02	72	47	0.61	5.76214
Aplan-CEM-ATC25-C1_vs_Aplan-CEM-PreTreatment	chr16	2152998	2152998	G	A	RAB26	c.544G>A	p.Ala182Thr	missense_variant	MODERATE	66	0	0.017	64	18	0.271	5.68975
Aplan-CEM-ATC25-C1_vs_Aplan-CEM-PreTreatment	chr16	2181035	2181035	T	TG	CASKIN1	c.2332dupC	p.Gln778fs	frameshift_variant	HIGH	69	0	0.016	78	46	0.616	6.0026
Aplan-CEM-ATC25-C1_vs_Aplan-CEM-PreTreatment	chr16	2209562	2209562	G	C	BRICD5	c.583C>G	p.Arg195Gly	missense_variant	MODERATE	59	0	0.017	91	17	0.233	3.91196
Aplan-CEM-ATC25-C1_vs_Aplan-CEM-PreTreatment	chr16	2209637	2209637	G	C	BRICD5	c.508C>G	p.Leu170Val	missense_variant	MODERATE	47	0	0.023	71	16	0.261	3.75376
Aplan-CEM-ATC25-C1_vs_Aplan-CEM-PreTreatment	chr16	2210170	2210170	G	T	BRICD5	c.292C>A	p.Pro98Thr	missense_variant	MODERATE	80	0	0.014	101	26	0.261	6.15476
Aplan-CEM-ATC25-C1_vs_Aplan-CEM-PreTreatment	chr16	2228419	2228419	G	A	E4F1	c.205G>A	p.Ala69Thr	missense_variant	MODERATE	40	0	0.028	65	28	0.422	6.30486
Aplan-CEM-ATC25-C1_vs_Aplan-CEM-PreTreatment	chr16	2232817	2232817	C	A	E4F1	c.792C>A	p.Thr264Thr	synonymous_variant	LOW	72	0	0.015	114	28	0.255	6.14452
Aplan-CEM-ATC25-C1_vs_Aplan-CEM-PreTreatment	chr16	2473752	2473752	G	A	NTN3	c.1394-4G>A		splice_region_variant&intron_variant	LOW	27	0	0.04	33	17	0.484	5.38235
Aplan-CEM-ATC25-C1_vs_Aplan-CEM-PreTreatment	chr16	2528277	2528277	C	T	AMDHD2	c.759C>T	p.Ser253Ser	synonymous_variant	LOW	76	0	0.014	143	30	0.21	5.86344
Aplan-CEM-ATC25-C1_vs_Aplan-CEM-PreTreatment	chr16	2817910	2817910	C	T	PRSS21	c.201C>T	p.C67C	sequence_feature	MODERATE	51	0	0.023	79	26	0.306	6.30595
Aplan-CEM-ATC25-C1_vs_Aplan-CEM-PreTreatment	chr16	2933847	2933847	C	G	FLYWCH1	c.1381C>G	p.Arg461Gly	missense_variant	MODERATE	109	0	0.01	127	36	0.306	5.99793
Aplan-CEM-ATC25-C1_vs_Aplan-CEM-PreTreatment	chr16	2966913	2966913	C	G	KREMEN2	c.644C>G	p.Ser215Trp	missense_variant	MODERATE	52	0	0.021	66	22	0.352	5.95572
Aplan-CEM-ATC25-C1_vs_Aplan-CEM-PreTreatment	chr16	2967239	2967239	C	G	KREMEN2	c.970C>G	p.Arg324Gly	missense_variant	MODERATE	63	0	0.017	63	14	0.222	4.26553
Aplan-CEM-ATC25-C1_vs_Aplan-CEM-PreTreatment	chr16	3013942	3013942	C	G	CLDN9	c.580C>G	p.Arg194Gly	missense_variant	MODERATE	64	0	0.016	90	20	0.221	4.98338
Aplan-CEM-ATC25-C1_vs_Aplan-CEM-PreTreatment	chr16	3013959	3013959	C	A	CLDN9	c.597C>A	p.Gly199Gly	synonymous_variant	LOW	67	0	0.016	87	40	0.46	6.17082
Aplan-CEM-ATC25-C1_vs_Aplan-CEM-PreTreatment	chr16	3092282	3092282	C	G	ZSCAN10	c.431G>C	p.Arg144Pro	missense_variant	MODERATE	86	0	0.012	111	29	0.258	6.1308
Aplan-CEM-ATC25-C1_vs_Aplan-CEM-PreTreatment	chr16	3141063	3141063	G	A	ZNF213	c.1096G>A	p.Val366Met	missense_variant	MODERATE	103	0	0.01	172	46	0.272	6.3051
Aplan-CEM-ATC25-C1_vs_Aplan-CEM-PreTreatment	chr16	3299233	3299233	A	T	TIGD7	c.1382T>A	p.Val461Asp	missense_variant	MODERATE	77	0	0.014	123	25	0.223	5.56674
Aplan-CEM-ATC25-C1_vs_Aplan-CEM-PreTreatment	chr16	3663464	3663464	C	A	TRAP1	c.1668G>T	p.Val556Val	synonymous_variant	LOW	62	0	0.019	65	16	0.246	4.94765
Aplan-CEM-ATC25-C1_vs_Aplan-CEM-PreTreatment	chr16	3664306	3664306	A	G	TRAP1	c.1537T>C	p.Tyr513His	missense_variant	MODERATE	54	0	0.02	79	20	0.256	4.96571
Aplan-CEM-ATC25-C1_vs_Aplan-CEM-PreTreatment	chr16	4114915	4114915	C	G	ADCY9	c.528G>C	p.Ser176Ser	synonymous_variant	LOW	104	0	0.011	110	25	0.229	6.29078
Aplan-CEM-ATC25-C1_vs_Aplan-CEM-PreTreatment	chr16	4744969	4744969	C	G	C16orf71	c.1043C>G	p.Ala348Gly	missense_variant	MODERATE	88	0	0.014	105	29	0.273	6.66099
Aplan-CEM-ATC25-C1_vs_Aplan-CEM-PreTreatment	chr16	5007450	5007450	C	G	SEC14L5	c.1536C>G	p.Tyr512*	stop_gained	HIGH	30	0	0.036	44	11	0.282	2.6647
Aplan-CEM-ATC25-C1_vs_Aplan-CEM-PreTreatment	chr16	10906891	10906891	G	A	CIITA	c.1402G>A	p.Asp468Asn	missense_variant	MODERATE	83	0	0.014	118	46	0.423	6.04929
Aplan-CEM-ATC25-C1_vs_Aplan-CEM-PreTreatment	chr16	10907693	10907693	C	G	CIITA	c.2204C>G	p.Pro735Arg	missense_variant	MODERATE	59	0	0.019	96	27	0.284	6.00354
Aplan-CEM-ATC25-C1_vs_Aplan-CEM-PreTreatment	chr16	11123922	11123922	C	G	CLEC16A	c.2449C>G	p.Arg817Gly	missense_variant	MODERATE	47	0	0.022	69	14	0.213	3.14903
Aplan-CEM-ATC25-C1_vs_Aplan-CEM-PreTreatment	chr16	12568506	12568506	C	A	SNX29	c.2319C>A	p.Val773Val	splice_region_variant&synonymous_variant	LOW	31	0	0.032	68	17	0.278	2.95316
Aplan-CEM-ATC25-C1_vs_Aplan-CEM-PreTreatment	chr16	18561983	18561983	C	G	NOMO2	c.58G>C	p.Val20Leu	missense_variant	MODERATE	105	0	0.011	120	34	0.276	5.98546
Aplan-CEM-ATC25-C1_vs_Aplan-CEM-PreTreatment	chr16	20384678	20384679	CA	C	PDILT	c.375delT	p.Phe125fs	frameshift_variant	HIGH	39	0	0.025	63	20	0.291	4.72551
Aplan-CEM-ATC25-C1_vs_Aplan-CEM-PreTreatment	chr16	21233786	21233786	C	G	ANKS4B	c.49C>G	p.Leu17Val	missense_variant	MODERATE	36	0	0.029	54	16	0.333	3.90306
Aplan-CEM-ATC25-C1_vs_Aplan-CEM-PreTreatment	chr16	21233820	21233820	C	G	ANKS4B	c.83C>G	p.Ser28Trp	missense_variant	MODERATE	39	0	0.028	54	17	0.355	4.30623
Aplan-CEM-ATC25-C1_vs_Aplan-CEM-PreTreatment	chr16	21250605	21250605	C	G	ANKS4B	c.1039C>G	p.Pro347Ala	missense_variant	MODERATE	69	0	0.015	142	42	0.29	6.22982
Aplan-CEM-ATC25-C1_vs_Aplan-CEM-PreTreatment	chr16	21983148	21983148	A	G	UQCRC2	c.1339A>G	p.Thr447Ala	missense_variant	MODERATE	30	0	0.037	55	12	0.222	2.18375
Aplan-CEM-ATC25-C1_vs_Aplan-CEM-PreTreatment	chr16	22092640	22092640	G	A	VWA3A	c.3G>A	p.Met1?	start_lost	HIGH	38	0	0.031	49	11	0.25	2.71886
Aplan-CEM-ATC25-C1_vs_Aplan-CEM-PreTreatment	chr16	22280341	22280341	G	C	EEF2K	c.2033G>C	p.Gly678Ala	missense_variant	MODERATE	86	0	0.013	85	26	0.31	6.01065
Aplan-CEM-ATC25-C1_vs_Aplan-CEM-PreTreatment	chr16	23106489	23106490	TA	T	USP31	c.772-3delT		splice_region_variant&intron_variant	LOW	30	0	0.031	74	41	0.55	5.87957
Aplan-CEM-ATC25-C1_vs_Aplan-CEM-PreTreatment	chr16	23756416	23756416	C	G	CHP2	c.381C>G	p.Arg127Arg	synonymous_variant	LOW	30	0	0.033	50	13	0.268	2.86886
Aplan-CEM-ATC25-C1_vs_Aplan-CEM-PreTreatment	chr16	23836232	23836232	C	T	PRKCB	c.57C>T	p.Arg19Arg	synonymous_variant	LOW	57	0	0.021	82	18	0.228	4.37127
Aplan-CEM-ATC25-C1_vs_Aplan-CEM-PreTreatment	chr16	24790994	24790994	C	T	TNRC6A	c.2352C>T	p.Gly784Gly	synonymous_variant	LOW	84	0	0.013	138	59	0.427	5.77246
Aplan-CEM-ATC25-C1_vs_Aplan-CEM-PreTreatment	chr16	24931208	24931208	T	C	ARHGAP17	c.2091A>G	p.Ala697Ala	synonymous_variant	LOW	73	0	0.014	128	38	0.306	6.50297
Aplan-CEM-ATC25-C1_vs_Aplan-CEM-PreTreatment	chr16	24939493	24939493	C	G	ARHGAP17	c.1595G>C	p.Gly532Ala	missense_variant	MODERATE	69	0	0.017	112	36	0.293	6.18276
Aplan-CEM-ATC25-C1_vs_Aplan-CEM-PreTreatment	chr16	27220478	27220478	C	G	KDM8	c.1193C>G	p.Thr398Arg	missense_variant	MODERATE	45	0	0.027	68	16	0.254	3.77205
Aplan-CEM-ATC25-C1_vs_Aplan-CEM-PreTreatment	chr16	27489115	27489115	G	C	GTF3C1	c.3357C>G	p.Leu1119Leu	synonymous_variant	LOW	30	0	0.037	40	13	0.303	3.4829
Aplan-CEM-ATC25-C1_vs_Aplan-CEM-PreTreatment	chr16	28871913	28871913	A	G	SH2B1	c.1443A>G	p.Gly481Gly	synonymous_variant	LOW	24	0	0.038	45	24	0.511	5.67052
Aplan-CEM-ATC25-C1_vs_Aplan-CEM-PreTreatment	chr16	28898007	28898007	G	C	ATP2A1	c.1427G>C	p.Arg476Pro	missense_variant	MODERATE	46	0	0.024	68	15	0.201	3.47865
Aplan-CEM-ATC25-C1_vs_Aplan-CEM-PreTreatment	chr16	28935475	28935475	C	T	CD19	c.867C>T	p.Gly289Gly	synonymous_variant	LOW	26	0	0.043	47	13	0.308	2.56365
Aplan-CEM-ATC25-C1_vs_Aplan-CEM-PreTreatment	chr16	28936530	28936531	TC	T	CD19	c.1019delC	p.Pro340fs	frameshift_variant	HIGH	23	0	0.047	34	10	0.29	2.43104
Aplan-CEM-ATC25-C1_vs_Aplan-CEM-PreTreatment	chr16	28937357	28937357	C	T	CD19	c.1285C>T	p.Gln429*	stop_gained	HIGH	24	0	0.043	66	18	0.263	2.62136
Aplan-CEM-ATC25-C1_vs_Aplan-CEM-PreTreatment	chr16	28981989	28981989	C	A	SPNS1	c.1033C>A	p.Arg345Ser	missense_variant	MODERATE	66	0	0.017	81	17	0.223	4.57401
Aplan-CEM-ATC25-C1_vs_Aplan-CEM-PreTreatment	chr16	28982030	28982030	C	T	SPNS1	c.1074C>T	p.Pro358Pro	synonymous_variant	LOW	57	0	0.02	82	21	0.267	5.29121
Aplan-CEM-ATC25-C1_vs_Aplan-CEM-PreTreatment	chr16	29694971	29694971	G	A	QPRT	c.321G>A	p.Thr107Thr	synonymous_variant	LOW	79	0	0.013	106	60	0.573	5.84901
Aplan-CEM-ATC25-C1_vs_Aplan-CEM-PreTreatment	chr16	29810176	29810177	CG	C		n.29810177delC	p.A157Rfs*6	TF_binding_site_variant	LOW	64	0	0.018	90	29	0.321	5.91922
Aplan-CEM-ATC25-C1_vs_Aplan-CEM-PreTreatment	chr16	29834012	29834012	C	G	MVP	c.523C>G	p.Arg175Gly	missense_variant	MODERATE	59	0	0.017	106	30	0.303	6.08786
Aplan-CEM-ATC25-C1_vs_Aplan-CEM-PreTreatment	chr16	29834042	29834042	C	G	MVP	c.553C>G	p.Arg185Gly	missense_variant	MODERATE	63	0	0.016	106	29	0.264	6.1285
Aplan-CEM-ATC25-C1_vs_Aplan-CEM-PreTreatment	chr16	29845896	29845896	C	G	MVP	c.2055C>G	p.Arg685Arg	synonymous_variant	LOW	41	0	0.024	40	10	0.244	3.34556
Aplan-CEM-ATC25-C1_vs_Aplan-CEM-PreTreatment	chr16	29901681	29901681	C	G	ASPHD1	c.710C>G	p.Pro237Arg	missense_variant	MODERATE	78	0	0.014	91	20	0.224	5.55482
Aplan-CEM-ATC25-C1_vs_Aplan-CEM-PreTreatment	chr16	29983624	29983624	G	A	TAOK2	c.1382G>A	p.Arg461His	missense_variant	MODERATE	92	0	0.013	157	29	0.204	5.83287
Aplan-CEM-ATC25-C1_vs_Aplan-CEM-PreTreatment	chr16	29985528	29985528	C	T	TAOK2	c.1738C>T	p.Leu580Leu	synonymous_variant	LOW	93	0	0.012	153	33	0.224	5.9026
Aplan-CEM-ATC25-C1_vs_Aplan-CEM-PreTreatment	chr16	29987637	29987637	G	A	TAOK2	c.3365G>A	p.Gly1122Asp	missense_variant	MODERATE	106	0	0.01	134	37	0.265	5.9608
Aplan-CEM-ATC25-C1_vs_Aplan-CEM-PreTreatment	chr16	30112375	30112375	C	T	GDPD3	c.414G>A	p.Leu138Leu	synonymous_variant	LOW	50	0	0.021	83	23	0.281	5.17184
Aplan-CEM-ATC25-C1_vs_Aplan-CEM-PreTreatment	chr16	30116779	30116779	C	G	MAPK3	c.1029G>C	p.Glu343Asp	missense_variant	MODERATE	81	0	0.014	102	20	0.215	5.39921
Aplan-CEM-ATC25-C1_vs_Aplan-CEM-PreTreatment	chr16	30117782	30117782	G	A	MAPK3	c.663C>T	p.G221G	structural_interaction_variant	HIGH	14	0	0.065	42	18	0.384	2.64382
Aplan-CEM-ATC25-C1_vs_Aplan-CEM-PreTreatment	chr16	30359220	30359220	G	A	TBC1D10B	c.1594C>T	p.Leu532Leu	synonymous_variant	LOW	67	0	0.017	107	24	0.242	5.34053
Aplan-CEM-ATC25-C1_vs_Aplan-CEM-PreTreatment	chr16	30359778	30359778	G	A	TBC1D10B	c.1335C>T	p.Cys445Cys	synonymous_variant	LOW	50	0	0.022	70	16	0.25	3.80112
Aplan-CEM-ATC25-C1_vs_Aplan-CEM-PreTreatment	chr16	30397819	30397819	G	C	ZNF48	c.569G>C	p.Arg190Pro	missense_variant	MODERATE	103	2	0.014	122	27	0.216	5.43001
Aplan-CEM-ATC25-C1_vs_Aplan-CEM-PreTreatment	chr16	30532599	30532599	C	T	AC002310.11	c.893G>A	p.Arg298His	missense_variant	MODERATE	63	0	0.016	77	14	0.223	3.58736
Aplan-CEM-ATC25-C1_vs_Aplan-CEM-PreTreatment	chr16	30737393	30737393	G	A	SRCAP	c.7353G>A	p.Pro2451Pro	synonymous_variant	LOW	73	0	0.015	127	28	0.243	5.67831
Aplan-CEM-ATC25-C1_vs_Aplan-CEM-PreTreatment	chr16	30964708	30964708	C	A	SETD1A	c.966C>A	p.Thr322Thr	synonymous_variant	LOW	46	0	0.023	98	31	0.318	5.82501
Aplan-CEM-ATC25-C1_vs_Aplan-CEM-PreTreatment	chr16	30971688	30971688	C	A	SETD1A	c.3327C>A	p.Pro1109Pro	synonymous_variant	LOW	18	0	0.054	45	18	0.405	2.89166
Aplan-CEM-ATC25-C1_vs_Aplan-CEM-PreTreatment	chr16	31078361	31078361	C	G	ZNF646	c.2037C>G	p.Gly679Gly	synonymous_variant	LOW	83	0	0.013	125	33	0.261	5.95791
Aplan-CEM-ATC25-C1_vs_Aplan-CEM-PreTreatment	chr16	31143456	31143456	G	C	PRSS36	c.986C>G	p.Pro329Arg	missense_variant	MODERATE	68	0	0.016	127	33	0.245	5.85602
Aplan-CEM-ATC25-C1_vs_Aplan-CEM-PreTreatment	chr16	31473513	31473513	C	G	TGFB1I1	c.86C>G	p.Ala29Gly	missense_variant	MODERATE	32	0	0.031	50	10	0.25	2.26063
Aplan-CEM-ATC25-C1_vs_Aplan-CEM-PreTreatment	chr16	31488630	31488630	G	C	SLC5A2	c.1138G>C	p.Gly380Arg	missense_variant	MODERATE	32	0	0.029	78	14	0.203	2.02901
Aplan-CEM-ATC25-C1_vs_Aplan-CEM-PreTreatment	chr16	49281307	49281307	G	A	CBLN1	c.159C>T	p.Ile53Ile	synonymous_variant	LOW	53	0	0.021	59	27	0.436	5.95854
Aplan-CEM-ATC25-C1_vs_Aplan-CEM-PreTreatment	chr16	50675796	50675796	C	T	SNX20	c.256G>A	p.Glu86Lys	missense_variant	MODERATE	45	0	0.025	50	16	0.341	4.99596
Aplan-CEM-ATC25-C1_vs_Aplan-CEM-PreTreatment	chr16	53470841	53470841	C	G	RBL2	c.2622C>G	p.Phe874Leu	missense_variant	MODERATE	51	0	0.023	74	20	0.265	5.02988
Aplan-CEM-ATC25-C1_vs_Aplan-CEM-PreTreatment	chr16	53498441	53498441	C	G	AKTIP	c.198G>C	p.Thr66Thr	synonymous_variant	LOW	60	0	0.019	63	14	0.263	4.24626
Aplan-CEM-ATC25-C1_vs_Aplan-CEM-PreTreatment	chr16	56363023	56363023	C	T	AMFR	c.1818G>A	p.Ala606Ala	synonymous_variant	LOW	42	0	0.024	64	15	0.246	3.4805
Aplan-CEM-ATC25-C1_vs_Aplan-CEM-PreTreatment	chr16	56658691	56658691	C	G	MT1F	c.45C>G	p.Cys15Trp	missense_variant	MODERATE	50	0	0.02	86	22	0.263	4.78185
Aplan-CEM-ATC25-C1_vs_Aplan-CEM-PreTreatment	chr16	56830579	56830579	C	G	NUP93	c.979C>G	p.Arg327Gly	missense_variant	MODERATE	38	0	0.029	66	15	0.254	3.07165
Aplan-CEM-ATC25-C1_vs_Aplan-CEM-PreTreatment	chr16	56878157	56878157	C	T	SLC12A3	c.1176C>T	p.Thr392Thr	synonymous_variant	LOW	17	0	0.059	28	17	0.56	4.66687
Aplan-CEM-ATC25-C1_vs_Aplan-CEM-PreTreatment	chr16	56879567	56879567	C	T	SLC12A3	c.1361C>T	p.Ala454Val	missense_variant	MODERATE	28	0	0.036	20	8	0.428	3.47648
Aplan-CEM-ATC25-C1_vs_Aplan-CEM-PreTreatment	chr16	57026033	57026033	A	G	NLRC5	c.1090A>G	p.Met364Val	missense_variant	MODERATE	67	0	0.015	88	17	0.212	4.43466
Aplan-CEM-ATC25-C1_vs_Aplan-CEM-PreTreatment	chr16	57469735	57469735	A	G	POLR2C	c.413A>G	p.Asp138Gly	missense_variant	MODERATE	37	0	0.028	34	11	0.345	3.95182
Aplan-CEM-ATC25-C1_vs_Aplan-CEM-PreTreatment	chr16	57685791	57685792	CG	C	ADGRG3	c.1410delG	p.Lys471fs	frameshift_variant	HIGH	41	0	0.027	66	25	0.363	5.65754
Aplan-CEM-ATC25-C1_vs_Aplan-CEM-PreTreatment	chr16	57996946	57996946	C	G	ZNF319	c.1320G>C	p.Ala440Ala	synonymous_variant	LOW	67	0	0.015	92	30	0.337	6.20459
Aplan-CEM-ATC25-C1_vs_Aplan-CEM-PreTreatment	chr16	58043248	58043248	C	G	MMP15	c.1342C>G	p.Pro448Ala	missense_variant	MODERATE	38	0	0.028	58	12	0.235	2.55367
Aplan-CEM-ATC25-C1_vs_Aplan-CEM-PreTreatment	chr16	58516621	58516621	T	C	SETD6	c.620T>C	p.Val207Ala	missense_variant	MODERATE	51	0	0.023	76	40	0.516	5.80946
Aplan-CEM-ATC25-C1_vs_Aplan-CEM-PreTreatment	chr16	66580170	66580170	C	A	CMTM2	c.430C>A	p.Leu144Met	missense_variant	MODERATE	49	0	0.023	64	20	0.333	5.25425
Aplan-CEM-ATC25-C1_vs_Aplan-CEM-PreTreatment	chr16	67167831	67167831	G	A	HSF4	c.966G>A	p.Pro322Pro	synonymous_variant	LOW	56	0	0.022	95	24	0.234	5.31642
Aplan-CEM-ATC25-C1_vs_Aplan-CEM-PreTreatment	chr16	67237497	67237497	T	C	FHOD1	c.827A>G	p.Tyr276Cys	missense_variant	MODERATE	60	0	0.017	65	15	0.241	4.54144
Aplan-CEM-ATC25-C1_vs_Aplan-CEM-PreTreatment	chr16	67390549	67390549	C	T	TPPP3	c.272G>A	p.Ser91Asn	missense_variant	MODERATE	73	0	0.016	117	33	0.306	6.16982
Aplan-CEM-ATC25-C1_vs_Aplan-CEM-PreTreatment	chr16	67646902	67646902	C	T	CARMIL2	c.540C>T	p.Asp180Asp	splice_region_variant&synonymous_variant	LOW	56	0	0.019	54	15	0.285	5.13309
Aplan-CEM-ATC25-C1_vs_Aplan-CEM-PreTreatment	chr16	67649296	67649296	G	A	CARMIL2	c.1731G>A	p.Met577Ile	missense_variant	MODERATE	44	0	0.023	50	13	0.261	3.86953
Aplan-CEM-ATC25-C1_vs_Aplan-CEM-PreTreatment	chr16	67649937	67649937	G	C	CARMIL2	c.2051G>C	p.Arg684Pro	missense_variant	MODERATE	45	0	0.023	60	11	0.211	2.66065
Aplan-CEM-ATC25-C1_vs_Aplan-CEM-PreTreatment	chr16	67879434	67879434	C	T	EDC4	c.1564C>T	p.Arg522Cys	missense_variant	MODERATE	83	0	0.013	157	33	0.213	6.34357
Aplan-CEM-ATC25-C1_vs_Aplan-CEM-PreTreatment	chr16	67880593	67880593	C	T	EDC4	c.2134C>T	p.Gln712*	stop_gained	HIGH	63	0	0.017	103	30	0.312	6.44812
Aplan-CEM-ATC25-C1_vs_Aplan-CEM-PreTreatment	chr16	67909322	67909322	C	T	PSKH1	c.573C>T	p.Thr191Thr	synonymous_variant	LOW	100	0	0.011	146	30	0.209	6.32221
Aplan-CEM-ATC25-C1_vs_Aplan-CEM-PreTreatment	chr16	67935666	67935666	C	T	PSMB10	c.415G>A	p.Val139Met	missense_variant	MODERATE	37	0	0.027	58	12	0.233	2.55609
Aplan-CEM-ATC25-C1_vs_Aplan-CEM-PreTreatment	chr16	67946208	67946208	A	G	SLC12A4	c.2576T>C	p.Met859Thr	missense_variant	MODERATE	59	0	0.018	89	44	0.475	5.93925
Aplan-CEM-ATC25-C1_vs_Aplan-CEM-PreTreatment	chr16	67977785	67977785	C	T	DPEP3	c.876G>A	p.Leu292Leu	synonymous_variant	LOW	60	0	0.018	82	20	0.243	5.0744
Aplan-CEM-ATC25-C1_vs_Aplan-CEM-PreTreatment	chr16	68234002	68234002	A	G	ESRP2	c.433T>C	p.Ser145Pro	missense_variant	MODERATE	30	0	0.034	58	13	0.269	2.45843
Aplan-CEM-ATC25-C1_vs_Aplan-CEM-PreTreatment	chr16	68255843	68255843	C	G	PLA2G15	c.580C>G	p.Leu194Val	missense_variant	MODERATE	29	0	0.033	46	12	0.268	2.62968
Aplan-CEM-ATC25-C1_vs_Aplan-CEM-PreTreatment	chr16	68255869	68255869	G	A	PLA2G15	c.606G>A	p.Met202Ile	missense_variant	MODERATE	29	0	0.035	46	12	0.268	2.62968
Aplan-CEM-ATC25-C1_vs_Aplan-CEM-PreTreatment	chr16	68275062	68275062	C	A	SLC7A6	c.336C>A	p.Tyr112*	stop_gained	HIGH	70	0	0.015	97	22	0.232	5.59316
Aplan-CEM-ATC25-C1_vs_Aplan-CEM-PreTreatment	chr16	68371905	68371905	G	A	SMPD3	c.277C>T	p.Arg93Trp	missense_variant	MODERATE	95	0	0.011	96	26	0.262	6.81864
Aplan-CEM-ATC25-C1_vs_Aplan-CEM-PreTreatment	chr16	69109597	69109597	C	G	HAS3	c.202C>G	p.Arg68Gly	missense_variant	MODERATE	38	0	0.03	78	25	0.277	4.7787
Aplan-CEM-ATC25-C1_vs_Aplan-CEM-PreTreatment	chr16	69385969	69385969	C	G	TERF2	c.3G>C	p.Met1?	start_lost	HIGH	51	0	0.023	73	17	0.25	4.11333
Aplan-CEM-ATC25-C1_vs_Aplan-CEM-PreTreatment	chr16	70474644	70474644	G	T	FUK	c.2201G>T	p.Gly734Val	missense_variant	MODERATE	74	0	0.016	85	18	0.219	5.27775
Aplan-CEM-ATC25-C1_vs_Aplan-CEM-PreTreatment	chr16	72107451	72107451	G	T	DHX38	c.2712G>T	p.Gln904His	missense_variant	MODERATE	62	0	0.017	113	40	0.357	5.97229
Aplan-CEM-ATC25-C1_vs_Aplan-CEM-PreTreatment	chr16	74628541	74628541	C	G	RFWD3	c.1880G>C	p.Trp627Ser	missense_variant	MODERATE	59	0	0.021	64	16	0.218	4.89827
Aplan-CEM-ATC25-C1_vs_Aplan-CEM-PreTreatment	chr16	75114128	75114128	C	G	LDHD	c.736G>C	p.Val246Leu	missense_variant	MODERATE	61	0	0.017	103	24	0.222	5.27641
Aplan-CEM-ATC25-C1_vs_Aplan-CEM-PreTreatment	chr16	81660903	81660903	A	G	CMIP	c.701A>G	p.Glu234Gly	missense_variant	MODERATE	43	0	0.026	63	14	0.255	3.18072
Aplan-CEM-ATC25-C1_vs_Aplan-CEM-PreTreatment	chr16	83602477	83602477	A	G	CDH13	c.1125A>G	p.Glu375Glu	synonymous_variant	LOW	34	0	0.032	50	18	0.35	4.6586
Aplan-CEM-ATC25-C1_vs_Aplan-CEM-PreTreatment	chr16	84195115	84195115	C	G	ADAD2	c.870C>G	p.Ala290Ala	synonymous_variant	LOW	86	0	0.012	146	30	0.213	6.21523
Aplan-CEM-ATC25-C1_vs_Aplan-CEM-PreTreatment	chr16	84195680	84195680	C	G	ADAD2	c.1281C>G	p.Gly427Gly	synonymous_variant	LOW	77	0	0.014	106	24	0.242	5.73515
Aplan-CEM-ATC25-C1_vs_Aplan-CEM-PreTreatment	chr16	84408493	84408493	C	G	ATP2C2	c.416C>G	p.Thr139Arg	missense_variant&splice_region_variant	MODERATE	29	0	0.037	58	15	0.286	2.75616
Aplan-CEM-ATC25-C1_vs_Aplan-CEM-PreTreatment	chr16	84661573	84661573	T	C	KLHL36	c.1296-5T>C		splice_region_variant&intron_variant	LOW	40	0	0.028	53	26	0.49	6.03535
Aplan-CEM-ATC25-C1_vs_Aplan-CEM-PreTreatment	chr16	85611450	85611451	AG	A		n.85611451delG		TF_binding_site_variant	LOW	19	0	0.056	25	9	0.381	2.24585
Aplan-CEM-ATC25-C1_vs_Aplan-CEM-PreTreatment	chr16	86542148	86542148	C	G	MTHFSD	c.508G>C	p.Ala170Pro	missense_variant	MODERATE	35	0	0.034	61	16	0.278	3.40541
Aplan-CEM-ATC25-C1_vs_Aplan-CEM-PreTreatment	chr16	86568372	86568372	C	G	FOXC2	c.1037C>G	p.Ala346Gly	missense_variant	MODERATE	30	0	0.034	48	10	0.227	2.239
Aplan-CEM-ATC25-C1_vs_Aplan-CEM-PreTreatment	chr16	87690080	87690080	C	G	JPH3	c.1720C>G	p.Arg574Gly	missense_variant	MODERATE	64	0	0.017	83	22	0.266	5.7675
Aplan-CEM-ATC25-C1_vs_Aplan-CEM-PreTreatment	chr16	88027559	88027559	C	G	BANP	c.948C>G	p.Arg316Arg	synonymous_variant	LOW	38	0	0.03	63	24	0.389	5.39001
Aplan-CEM-ATC25-C1_vs_Aplan-CEM-PreTreatment	chr16	88655389	88655389	C	T	MVD	c.707G>A	p.R236H	structural_interaction_variant	HIGH	56	0	0.02	66	20	0.3	5.78367
Aplan-CEM-ATC25-C1_vs_Aplan-CEM-PreTreatment	chr16	88656157	88656157	C	G	MVD	c.551G>C	p.Arg184Pro	missense_variant	MODERATE	81	0	0.014	105	31	0.279	6.15927
Aplan-CEM-ATC25-C1_vs_Aplan-CEM-PreTreatment	chr16	88681407	88681407	C	A	SNAI3	c.384G>T	p.Leu128Phe	missense_variant	MODERATE	120	0	0.009487	118	30	0.245	6.0035
Aplan-CEM-ATC25-C1_vs_Aplan-CEM-PreTreatment	chr16	88706247	88706247	G	T	RNF166	c.79C>A	p.Leu27Met	missense_variant	MODERATE	29	0	0.042	38	16	0.437	4.64834
Aplan-CEM-ATC25-C1_vs_Aplan-CEM-PreTreatment	chr16	88712633	88712633	G	A	CTU2	c.678G>A	p.Leu226Leu	synonymous_variant	LOW	56	0	0.019	86	22	0.247	5.21936
Aplan-CEM-ATC25-C1_vs_Aplan-CEM-PreTreatment	chr16	88835759	88835759	A	T	GALNS	c.724T>A	p.Ser242Thr	missense_variant	MODERATE	40	0	0.026	59	12	0.235	2.86497
Aplan-CEM-ATC25-C1_vs_Aplan-CEM-PreTreatment	chr16	89227451	89227451	C	G	ZNF778	c.1163C>G	p.Thr388Arg	missense_variant	MODERATE	95	0	0.012	110	24	0.22	5.93114
Aplan-CEM-ATC25-C1_vs_Aplan-CEM-PreTreatment	chr16	89523998	89523998	C	G	SPG7	c.377-8C>G		splice_region_variant&intron_variant	LOW	54	1	0.021	54	13	0.251	3.04435
Aplan-CEM-ATC25-C1_vs_Aplan-CEM-PreTreatment	chr16	89583721	89583721	C	G	CPNE7	c.607C>G	p.Arg203Gly	missense_variant	MODERATE	46	1	0.026	58	20	0.348	4.44709
Aplan-CEM-ATC25-C1_vs_Aplan-CEM-PreTreatment	chr16	89595477	89595477	C	T	CPNE7	c.1638C>T	p.Gly546Gly	synonymous_variant	LOW	36	0	0.031	66	35	0.545	6.16624
Aplan-CEM-ATC25-C1_vs_Aplan-CEM-PreTreatment	chr16	89636365	89636365	G	A	DPEP1	c.339G>A	p.Pro113Pro	synonymous_variant	LOW	115	1	0.018	129	30	0.239	5.89029
Aplan-CEM-ATC25-C1_vs_Aplan-CEM-PreTreatment	chr16	89697344	89697345	GC	G	SPATA2L	c.1264delG	p.Ala422fs	frameshift_variant	HIGH	69	0	0.015	99	43	0.435	6.26362
Aplan-CEM-ATC25-C1_vs_Aplan-CEM-PreTreatment	chr16	89710913	89710913	G	C	VPS9D1	c.931C>G	p.Pro311Ala	missense_variant	MODERATE	62	0	0.018	78	20	0.275	5.55146
Aplan-CEM-ATC25-C1_vs_Aplan-CEM-PreTreatment	chr16	89710918	89710918	G	C	VPS9D1	c.926C>G	p.Pro309Arg	missense_variant	MODERATE	61	0	0.018	78	21	0.286	5.43119
Aplan-CEM-ATC25-C1_vs_Aplan-CEM-PreTreatment	chr16	89850336	89850336	C	G	SPIRE2	c.321C>G	p.Arg107Arg	synonymous_variant	LOW	35	0	0.033	46	14	0.308	3.76934
Aplan-CEM-ATC25-C1_vs_Aplan-CEM-PreTreatment	chr16	89850346	89850346	T	C	SPIRE2	c.331T>C	p.Trp111Arg	missense_variant	MODERATE	37	0	0.032	49	14	0.317	3.72447
Aplan-CEM-ATC25-C1_vs_Aplan-CEM-PreTreatment	chr16	89854511	89854511	C	G	SPIRE2	c.751C>G	p.Arg251Gly	missense_variant	MODERATE	35	0	0.03	47	13	0.279	3.39087
Aplan-CEM-ATC25-C1_vs_Aplan-CEM-PreTreatment	chr16	89860743	89860743	C	G	SPIRE2	c.1523C>G	p.Ser508Trp	missense_variant	MODERATE	26	0	0.043	54	12	0.214	2.14795
Aplan-CEM-ATC25-C1_vs_Aplan-CEM-PreTreatment	chr16	89863533	89863533	C	G	SPIRE2	c.1633C>G	p.Arg545Gly	missense_variant	MODERATE	39	0	0.027	65	21	0.321	4.71649
Aplan-CEM-ATC25-C1_vs_Aplan-CEM-PreTreatment	chr16	89885929	89885929	C	G	TCF25	c.511C>G	p.Leu171Val	missense_variant	MODERATE	46	0	0.024	60	11	0.215	2.66543
Aplan-CEM-ATC25-C1_vs_Aplan-CEM-PreTreatment	chr17	414107	414107	C	T	C17orf97	c.1264C>T	p.Leu422Leu	synonymous_variant	LOW	94	0	0.011	157	89	0.549	5.80363
Aplan-CEM-ATC25-C1_vs_Aplan-CEM-PreTreatment	chr17	1468119	1468119	G	C	MYO1C	c.2765C>G	p.Ala922Gly	missense_variant	MODERATE	60	0	0.018	92	23	0.271	5.48048
[truncated: 26,397 more rows]
