# Supplementary material for: 5-Aza-4’-thio-2’-deoxycytidine induces C&gt;G transversions in a specific trinucleotide context and leads to acute lymphoid leukemia
Source: Research Square preprint supplement (doi:10.21203/rs.3.rs-3186246/v1), 2023-12-19
Supplement: Supplementary file 6 [file 73dbb74aa9684c2d4832f067.xlsx]

## Sheet: Experimental Mice Data
Mouse #	Age (Months)	Vendor	Experiment	Treatment	Conditioning Regiment	# Cycles at Death	Necropsy Report	HGB	WBC	Plt	Diagnoses
3501	5	Charles River	8th	PBS	IR	7	Splenomegaly, pleural effusion	14.6	54.16	479	Recipient T-ALL
3502	5	Charles River	8th	PBS	IR	8	No abnormalities	12	8.8	717	Survived to Endpoint
3503	5	Charles River	8th	PBS	IR	7	Hepatosplenomegaly	13.2	36.55	389	Recipient T-ALL
3504	5	Charles River	8th	PBS	IR	5	Hepatosplenomegaly, thymoma, lymph node tumors	9.2*	14.38	450	Unknown
3505	5	Charles River	8th	PBS	IR	8	Unremarkable	12.4	4.1	610	Survived to Endpoint
3506	5	Charles River	8th	PBS	IR	8	Thymoma	13.3	2.24	791	Recipient T-ALL
3507	5	Charles River	8th	1.0 mg/kg ATC	IR	4	Hepatosplenomegaly, thymoma	6.1*	4.04	213	Unknown
3508	5	Charles River	8th	1.0 mg/kg ATC	IR	4	Hepatosplenomegaly	11.6*	5.94	665	Unknown
3509	5	Charles River	8th	1.0 mg/kg ATC	IR	5	Hepatosplenomegaly, thymoma, lymph node tumors	7.8	3.18	556	Donor B-ALL
3510	5	Charles River	8th	1.0 mg/kg ATC	IR	4	Hepatosplenomegaly, thymoma, lymph node tumors, cystic kidney	5.1	11.1	781	Recipient T-ALL
3511	5	Charles River	8th	1.0 mg/kg ATC	IR	4	Hepatosplenomegaly, thymoma, thoracic lymph node tumors	8.8*	16.66	426	Unknown
3512	5	Charles River	8th	1.0 mg/kg ATC	IR	5	Very large spleen and liver, large thymus and LN	8.4*	3.8	346	Unknown
3585	4.5	Charles River	9th	PBS	IR	9	Low BM cellularity and fibrotic BM	12.7	5.48	838	Myelofibrosis
3586	4.5	Charles River	9th	PBS	IR	14	pleural effusion, cardiomegaly	11.2	6.56	567	Donor AML
3587	4.5	Charles River	9th	PBS	IR	6	Hepatoslenomegaly, thymoma	6.4	33.66	557	Donor T-ALL
3588	4.5	Charles River	9th	PBS	IR	6	Hepatosplenomegaly, thymoma	8.8*	13	171	Unknown
3589	4.5	Charles River	9th	PBS	IR	7	Splenomegaly	6.1	14.2	826	Donor AML
3590	4.5	Charles River	9th	PBS	IR	7	Hepatosplenamegaly, thymoma	6.5	7.1	321	Donor ETP
3591	4.5	Charles River	9th	PBS	IR	11	Hepatosplenomegaly	11.4*	12.22	605	Unknown
3595	4.5	Charles River	9th	0.5 mg/kg ATC	IR	3	Hepatosplenamegaly, thymoma, lymph node tumors, pleural effeusion	11.3	50.66	386	Recipient T-ALL
3596	4.5	Charles River	9th	0.5 mg/kg ATC	IR	2	Hepatosplenomegaly, thymoma	3.9	130.74	274	Donor ETP
3597	4.5	Charles River	9th	0.5 mg/kg ATC	IR	4	Hepatoslenomegaly, large thymoma	3.3	95.04	260	Donor ETP
3598	4.5	Charles River	9th	0.5 mg/kg ATC	IR	4	Thymoma	14.1	58.22	973	Donor ETP-ALL in BM/Spl. Recipient T-ALL in thymus
3599	4.5	Charles River	9th	0.5 mg/kg ATC	IR	3	Hepatosplenomegaly, thymoma	12.1*	8.64	615	Unknown
3600	4.5	Charles River	9th	0.5 mg/kg ATC	IR	3	Hepatosplenamegaly, thymoma	12.6	9.48	747	Recipient T-ALL in thymus. Donor AML in BM.
3601	4.5	Charles River	9th	0.5 mg/kg ATC	IR	2	Splenomegaly	10*	4.54	357	Unknown
3612	5.5	Charles River	10th	PBS	IR	10	Not reported	11.2	37.62	268	Donor AML
3613	5.5	Charles River	10th	PBS	IR	10	Not reported	11.3	13.46	717	Donor AML
3614	5.5	Charles River	10th	PBS	IR	4	Splenomegaly	12.5	40.78	231	Donor AML
3615	5.5	Charles River	10th	PBS	IR	4	Splenomegaly	3.4	53.7	110	Donor AML
3616	5.5	Charles River	10th	PBS	IR	9	Unremarkable	6.7	2.2	663	Donor MDS
3617	5.5	Charles River	10th	0.1 mg/kg ATC	IR	9	Hepatosplenomegaly, thymoma, lymph node tumors	9.5	18.14	436	Donor AML
3618	5.5	Charles River	10th	0.1 mg/kg ATC	IR	2	Splenomegaly	9.5	45.4	706	Donor AML
3619	5.5	Charles River	10th	0.1 mg/kg ATC	IR	6	Thymoma, lymph node tumors	11	13.48	689	Recipient T-ALL
3620	5.5	Charles River	10th	0.1 mg/kg ATC	IR	6	Hepatosplenomegaly, thymoma	5.1	129.76	269	Donor AML
3621	5.5	Charles River	10th	0.1 mg/kg ATC	IR	6	Thymoma, lymph node tumors	11	13.52	487	Donor AML
3622	5.5	Charles River	10th	0.1 mg/kg ATC	IR	11	Splenomegaly, thymoma	8.8	3.58	602	Donor AML
3623	5.5	Charles River	10th	0.1 mg/kg ATC	IR	6	Hepatosplenomegaly, lymph node tumors	10.2	15.9	153	Donor AML
3624	5.5	Charles River	10th	0.1 mg/kg ATC	IR	4	Too decayed for informative necropsy	9.2*	7.62	102	Unknown
3625	5.5	Charles River	10th	0.1 mg/kg ATC	IR	6	Hepatosplenomegaly, thymoma, lymph node tumors, pleural effusion, cardiomegaly	7.5	4.3	147	Recipient T-ALL.
3626	5.5	Charles River	10th	0.1 mg/kg ATC	IR	3	Splenomegaly, pleural effusion	9.1*	8.98	130	Unknown
3627	5.5	Charles River	10th	0.1 mg/kg ATC	IR	2	Splenomegaly, thymoma	7.9	33.2	154	Donor AML
3628	5.5	Charles River	10th	0.1 mg/kg ATC	IR	2	Splenomegaly	7.5	48.7	175	Donor AML
3629	5.5	Charles River	10th	1 mg/kg ATC	IR	5	Hepatosplenomegaly	9.8*	10.32	343	Unknown
3630	5.5	Charles River	10th	1 mg/kg ATC	IR	5	Thymoma, lymph node tumors	9.1	7.06	363	Recipient T-ALL
3631	5.5	Charles River	10th	1 mg/kg ATC	IR	4	Hepatosplenomegaly, thymoma, lymph node tumors, pleural effusion	10.2	15.9	176	Recipient T-ALL
3632	5.5	Charles River	10th	1 mg/kg ATC	IR	3	Hepatosplenomegaly, thymoma, lymph node tumors, pleural effusion	10	5.76	805	Recipient T-ALL
3633	5.5	Charles River	10th	1 mg/kg ATC	IR	5	Hepatosplenomegaly	8.4*	5.38	153	Unknown
3634	5.5	Charles River	10th	1 mg/kg ATC	IR	4	Hepatosplenomegaly, thymoma, lymph node tumors, pleural effusion	9.6	75.96	292	Donor AML in BM/Spl. Recipient T-ALL in thymus
3650	3.5	Charles River	11th	PBS	CASIN	10	Splenomegaly	7.3	13.76	657	Donor AML
3651	3.5	Charles River	11th	PBS	CASIN	7	Hepatosplenomegaly	8.6	77.46	668	Donor AML
3652	3.5	Charles River	11th	PBS	CASIN	11	Splenomegaly	6.8	8.86	359	Donor AML
3653	3.5	Charles River	11th	PBS	CASIN	13	Hepatosplenomegaly	13	5.64	708	Donor MDS
3654	3.5	Charles River	11th	PBS	CASIN	13	Hepatosplenomegaly	14.3	7.04	1122	Donor MDS
3655	3.5	Charles River	11th	PBS	CASIN	9	Hepatosplenomegaly	9.8	13.84	866	Donor AML
3656	3.5	Charles River	11th	0.1 mg/kg ATC	CASIN	7	Hepatosplenomegaly, thymoma	13.9	19.26	936	Recipient T-ALL
3657	3.5	Charles River	11th	0.1 mg/kg ATC	CASIN	11	Hepatosplenomegaly	6.5	28.3	216	Donor AML
3658	3.5	Charles River	11th	0.1 mg/kg ATC	CASIN	13	Hepatosplenomegaly, thymoma	9.8	4.14	280	Donor MDS
3659	3.5	Charles River	11th	0.1 mg/kg ATC	CASIN	9	Hepatosplenomegaly	9.5*	9.16	471	Unknown
3660	3.5	Charles River	11th	0.1 mg/kg ATC	CASIN	10	Hepatosplenomegaly	5.7	133.76	560	Donor AML
3661	3.5	Charles River	11th	0.1 mg/kg ATC	CASIN	12	Hepatosplenomegaly	10.2*	3.14	351	Unknown
3662	3.5	Charles River	11th	0.5 mg/kg ATC	CASIN	6	Hepatosplenomegaly, thymoma	14.1	8.94	822	Recipient T-ALL
3664	3.5	Charles River	11th	0.5 mg/kg ATC	CASIN	7	Hepatosplenomegaly, thymoma	10.4	39.98	422	Recipient T-ALL, Recipient ETP ALL
3665	3.5	Charles River	11th	0.5 mg/kg ATC	CASIN	6	Splenomegaly, thymoma	10.8*	7.64	535	Unknown
3666	3.5	Charles River	11th	0.5 mg/kg ATC	CASIN	5	Hepatosplenomegaly, thymoma	12.6	6.54	652	Recipient T-ALL
3667	3.5	Charles River	11th	0.5 mg/kg ATC	CASIN	5	Thymoma	12.3*	8.7	722	Unknown
3668	3.5	Charles River	11th	0.5 mg/kg ATC	CASIN	5	Hepatosplenomegaly, thymoma	9.4	22.44	321	Immature Donor AML, Recipient ETP ALL
3669	3.5	Charles River	11th	1 mg/kg ATC	CASIN	5	Hepatosplenomegaly, thymoma	13.3	7.34	699	Recipient T-ALL
3670	3.5	Charles River	11th	1 mg/kg ATC	CASIN	5	Thymoma	13.8	6.3	727	Recipient T-ALL
3671	3.5	Charles River	11th	1 mg/kg ATC	CASIN	5	Hepatosplenomegaly, thymoma	12.4	6.22	683	Donor MDS, Recipient T-ALL
3672	3.5	Charles River	11th	1 mg/kg ATC	CASIN	5	Hepatosplenomegaly, thymoma	12.9*	6.4	713	Unknown
3673	3.5	Charles River	11th	1 mg/kg ATC	CASIN	5	Hepatosplenomegaly, thymoma	13.5	5.62	796	Donor MDS, Recipient T-ALL
3674	3.5	Charles River	11th	1 mg/kg ATC	CASIN	5	Splenomegaly, thymoma	9.8	23.02	315	Recipient B-ALL, Recipient T-ALL
AML = Acute Myeloid Leukemia, T-ALL = T cell acute lymphoblastic leukemia, B-ALL = B cell acute lymphoblastic leukemia, ETP = Early thymic progenitor acute lymphoblastic leukemia, MDS= Myelodysplastic Syndrome
* Mouse found dead, value reflects most recent CBC prior to death

## Sheet: Donor Data
Mouse #	Sex	Age (Months)	Vendor	Experiment	Notes
7695	M	6	Charles River	8th
5072	M	6	Charles River	9th
M7802	M	8	Charles River	10th
5159	F	5	Charles River	11th	Combined with 5161
5161	M	5	Charles River	11th	Combined with 5159
