# Supplementary material for: 5-Aza-4’-thio-2’-deoxycytidine induces C&gt;G transversions in a specific trinucleotide context and leads to acute lymphoid leukemia
Source: Research Square preprint supplement (doi:10.21203/rs.3.rs-3186246/v1), 2023-12-19
Supplement: Supplementary file 7 [file 894077c8b4c3a7a1a377fb77.xlsx]

## Sheet: Sheet1
Gene Name	Mouse ID	DNA Type	Forward Sequence	Reverse Sequence
Cxcr1	3598	gDNA	tgtgggtcttaaagagcatgcg	ggtttatatgcctggcggaag
Myc	3598	gDNA	ctgaagcagatcagcaacaaccg	gcgtgaccagatccctgaattgg
Pten	3598	gDNA	ctgtgaagatcttgaccaatggct	ggaagtaaggaccagagacaaaaa
Flt3	3598	gDNA	ctggcagcccagggagctgtgc	gggaacaacgtggagtcatctt
Chd4	3598	gDNA	ggtagaagggagttgttaggct	ggttctctgacacctatgtgaag
Dnah2	3598	gDNA	ggtagaagggagttgttaggc	ggttctctgacacctatgtgaag
Notch1	3598	gDNA	aggagctggaccactggtcagg	cccagcggttgtacatctgcct
Notch1	3600	gDNA	aggagctggaccactggtcagg	cccagcggttgtacatctgcct
Gdf2	3598	gDNA	gaaggtggatttcctac gcagc	ggtcactgaccacggcagacctt
Neurl1b	3598	gDNA	caggctaagggcaagaacgtgc	ggcttcactgcgcacgacccgt
Cxcr1	3600	gDNA	aatggtttatatgcctggcgg	ccttcaggagtgagaccatcttg
Ikzf1 (1st SNV)	3600	gDNA	tctcagtgcttaccatgctacc	cctgaggacgcactccggtatg
Ikzf1 (2nd SNV)	3600	gDNA	gatacagagagcaacgcggagg	gcgaacactgccgcgtgctct
Bcl11b	3600	gDNA	agcggtggcgtgctgaggaacgg	cgcatgactcggtcgaaggcac
Lgmn	3600	gDNA	agtct cctcaggccagtggtgc	gggtcacaggtctgccatcttctt
Tmem204	3600	gDNA	agcagggcctggagcagtctacc	gcaccaatgttcaggtagcaaga
Mep1b	3600	gDNA	cagtaattagttatttccatctgc	ggagaccacaagagatggccac
Mmrn1	3600	gDNA	gatagagagctttatgtttctgc	ggactggcaagttcagaattcca
Loxhd1	3600	gDNA	catttctcccgtgtccactagtgg	cgagcagtcgctaaggtggcac
Pten	3598	cDNA	ctgtgaagatcttgaccaatggc	ccacgggtctgtaatccagg
Ikzf1 (1st SNV)	3600	cDNA	tggggaagaatgtgcagagg	tgtggcatcgctctttatgc
Myc	3598	cDNA	cccaaatcctgtacctcgtcc	gaatggacaggatgtaggcgg
Chd4	3598	cDNA	cagcagtgttatccactatgacg	gtaatcggactggttgtcgg
DcK	7298, 7298CR	gDNA	tatctgcaagaggtgcccgt	cccccagtcctctcaatgtg
