# Supplementary material for: 5-Aza-4’-thio-2’-deoxycytidine induces C&gt;G transversions in a specific trinucleotide context and leads to acute lymphoid leukemia
Source: Research Square preprint supplement (doi:10.21203/rs.3.rs-3186246/v1), 2023-12-19
Supplement: Supplementary file 8 [file 921fee9deb7156cc4838548e.xlsx]

## Sheet: As Counts
Name	3635	3636	3637	3638	3639	3642	3644	3676	3677	3678 BM	3678 Thymus	3679	3680	3683	3684	3689	3690	3691	5158	7821	7928	8387
Leukemia Type	T-ALL	T-ALL	T-ALL	T-ALL	T-ALL	T-ALL	B-ALL	T-ALL	T-ALL	B-ALL	T-ALL	T-ALL	T-ALL	T-ALL	T-ALL	T-ALL	T-ALL	T-ALL	T-ALL	T-ALL	T-ALL	B-ALL
Abl1
Actb								1
Akt1																						1
Akt2
Akt3												1
Alk		1							1							1
Amer1																1		1
Apc		1
Aph1A
Ar
Araf				1		1															1
Arfrp1
Arhgap26								1					1
Arid1A							1	1				1
Arid2									1
Asmtl
Asxl1																		1				1
Atm		1			1			1				1
Atr																		1
Atrx							1		1
Aurka				1														1
Aurkb								1								1						1
Axin1				1	1													1
Axl																				1
B2M										1
Bach1														1				1		1
Bap1										1
Bard1		1
Bcl10												1
Bcl11b		3		3					1		1	4	5			2		2	2
Bcl2
Bcl2L2
Bcl6	1								1			1			2
Bcl7A
Bcor											1					1				1
Bcorl1		1					3	1	1									1		1
Birc3											1
Blm
Braf																		1
Brca1										1
Brca2		1			2										1
Brd4												2
Brip1															1
Brsk1									1		1					1
Btg2
Btk
Btla
C11Orf30
C17Orf39
Cad												1
Calr																						1
Card11		1												1				1
Cbfb
Cbl								1
Ccnd1
Ccnd2
Ccnd3
Ccne1
Cct6B
Cd22								1				1
Cd274
Cd36		1
Cd58
Cd70
Cd79A
Cd79B				1													1
Cdc73												1
Cdh1				1	1						1				1
Cdk12
Cdk4
Cdk6
Cdk8
Cdkn1B
Cdkn2A
Cdkn2B
Cdkn2C
Cebpa
Chd2		1														1
Chek1								1								1
Chek2																						1
Cic											1	1						1			1
Ciita	1	1	1	1			1							1					1
Cks1B
Cps1
Crebbp
Crkl
Crlf2										1
Csf1R	1									1					1
Csf3R
Ctcf														1
Ctnna1		1		1										1								1
Ctnnb1
Cux1														1				2				1
Cxcr4								1
Daxx	1						1															1
Ddr2					1													1
Ddx3X									1			1		1	1					1		1
Dnm2												1			1	1						2
Dnmt3A									1
Dot1L				1	1					1	1			3						1
Dtx1		1						1		2		1
Dusp2
Dusp9
E2A
Ebf1
Ect2L															1
Eed
Egfr		1						1						1				1
Elp2																						1
Emsy												1
Ep300				1								1										1
Epha3		1								1
Epha5		1												1			1
Epha7					1						1
Ephb1								1							1				1
Erbb2		1		1			1					1
Erbb3		1		1								2						2
Erbb4												1								1		1
Erg				1
Esr1
Ets1
Etv6
Exosc6
Ezh2																					1
Faf1														1
Fam123B
Fam46C
Fanca	1																			2
Fancc								1
Fancd2				1												1
Fance		1
Fancf																1
Fancg
Fancl		1
Fas
Fbxo11
Fbxo31
Fbxw7		2						1
Fgf10																	1
Fgf14
Fgf19
Fgf23
Fgf3
Fgf4
Fgf6
Fgfr1		2												2
Fgfr2		1		1								1	1
Fgfr3		1										1				1
Fgfr4		1
Fhit		1		1
Flcn								1												1
Flt1	1							1		1							1					2
Flt3			1													1
Flt4	1				1								1			1						1
Flywch1																			1
Foxl2
Foxo1				1				1						1
Foxo3								2						1
Foxp1																						1
Frs2
Gadd45B
Gata1
Gata2
Gata3									1			1
Gid4							1
Gna11			2									1										1
Gna12
Gna13																					1
Gnaq
Gnas							1		1	1
Gpr124
Graf
Grin2A													1
Gsk3B																						1
Gtse1										1
Hdac1																1
Hdac4		1
Hdac7	1	2										1		1
Hgf
Hist1H1C
Hist1H1D
Hist1H1E
Hist1H2Ac										1
Hist1H2Ag
Hist1H2Al
Hist1H2Am
Hist1H2Bc
Hist1H2Bj
Hist1H2Bk
Hist1H2Bo
Hist1H3B
Hnf1A				2				1	1
Hras							2
Hsp90Aa1																	1
Ick
Id3																		1
Idh1
Idh2							1										1
Igf1R	1		1						1		1	1						1
Ikbke							1						1
Ikzf1	1				2				1	1	2	1	1		1	2	1			1	1
Ikzf2												1
Ikzf3							1		1
Il7R
Inhba
Inpp4B
Inpp5D	2
Irf1
Irf4	1				2		1		1
Irf8							1							1
Irs2		1
Jak1
Jak2		1										1
Jak3							3							1	1	1
Jarid2					1		1							1	1			1
Jun
Kat6A														1						1
Kdm2B	1						1
Kdm4C																1
Kdm5A	1							1	2
Kdm5C
Kdm6A		1
Kdr							1
Keap1				1
Kit														1
Klhl6
Kmt2A
Kmt2C				1										1								1
Kmt2D		1							1	3	1	1			1	1	2
Kras		1				1		1					1			1		1	1
Lef1
Lrp1B										1											1	1
Lrrk2		4													1					1
Maf
Mafb
Maged1									1
Malt1										1		1
Map2K1
Map2K2											1
Map2K4										2
Map3k1		4					1		1			1										1
Map3k14	1			1				1
Map3K6							1	1		1		1			3		1	1
Map3K7
Mapk1
Mcl1
Mdm2
Mdm4
Med12							1	1				1
Mef2B		1
Mef2C
Mek1
Mek2
Men1
Met					1										1		1
Mib1																						1
Mitf															1
Mki67		2		1						1		2		1
Mlh1
Mll
Mll2
Mll3
Mmset
Mpl												1		1
Mre11A
Msh2
Msh3	1			1									1				1	1
Msh6
Mtor		1				1					1	1		1						1
Mutyh																1
Myc
Mycl
Mycl1
Mycn
Myd88																					1
Myo18A									1	1		1		2		1	1
Myst3
Ncor2		2			1					2				1
Ncstn
Nf1	1	3		5			1				1	1					1					1
Nf2
Nfe2L2															1
Nfkbia
Nkx2-1
Nod1		1								1	1	3			1
Notch1		1			2	1		2				1	1	1	1	1				1	2	1
Notch2	1	1							1			1			1							1
Npm1
Nras								1
Nsd1									1			3
Nsd2
Nt5C2
Ntrk1							1		1
Ntrk2				1														1
Ntrk3		1
Nup93
Nup98									1			1										1
P2Ry8
Pag1											1			1
Pak3
Palb2								1
Pask
Pax5							2
Pbrm1								1		1				1								2
Pc
Pcbp1
Pclo		1														1	1				2	1
Pd-1
Pdcd1
Pdcd11							2							1
Pdcd1Lg2
Pdgfra															1		1
Pdgfrb				1			1
Pdk1
Pd-L1
Pd-L2
Phf6												1										1
Pik3Ca							1
Pik3Cg	1													3							1
Pik3R1
Pik3R2										1		1
Pim1
Plcg2								1								1		1
Pot1
Ppp2R1A
Prdm1		1													1
Prkar1A
Prkdc
Prss8										1								1
Ptch1		1					1		1											1
Pten			1		1				1		3	2						1
Ptpn11			1						1					1
Ptpn2
Ptpn6				1	1
Ptpro																						1
Rad21
Rad50	1						1
Rad51
Raf1
Rara							1				1			1				1
Rasgef1A		1					2
Rb1												1		1								1
Reln		2	1									2						1	1
Ret		1																				1
Rhoa
Rictor								3				1
Rnf43		1					1									1
Ros1		1					1				1
Rptor							1	1					1					1
Runx1		1
S1Pr2																						1
Sdha
Sdhb																1
Sdhc																	1
Sdhd
Serp2
Setbp1							1															1
Setd2												1			1
Sf3B1
Sgk1															1
Ship
Shp-1
Smad2
Smad4		1
Smarca1
Smarca4														1
Smarcb1																		1
Smc1A					1				1			1						1
Smc3
Smo											1			1				1
Socs1
Socs2
Socs3												1
Sox10				1					1
Sox2
Spen	1						1					1		1		2
Spop
Src															1
Srsf2
Stag2
Stat3																	2
Stat4									1
Stat5A											1	1	1	1	1
Stat5B																						2
Stat6	1
Stk11																		1
Sufu
Suz12
Taf1							1					1					1
Tbl1Xr1
Tcf3		1		1								1		1		1						1
Tcl1
Tcl1A
Tet2												2
Tgfbr2	1						1					1
Tll2																		1				1
Tmem30A
Tmsb4Xp8
Tmsl3
Tnfaip3												1			1
Tnfrsf11A
Tnfrsf14
Tnfrsf17			1
Tnfrsf6
Top1
Tp53
Tp63
Traf2			1											1
Traf3
Traf5									1		1						1
Trp53					1				1	2	1			1	2	1			1			1
Tsc1		1												1						1
Tsc2							1				1
Tshr																				1
Tusc3
Tyk2						1		2
U2Af1
U2Af2										1
Vhl
Wdr90
Whsc1									1								1			1
Wisp3
Wt1		1
Xbp1
Xpo1
Yy1Ap1
Zmym3	1																	1
Znf217
Znf24
Znf703
Zrsr2		1										1
Zscan3

## Sheet: As X's
Name	3535	3636	3637	3638	3639	3642	3644	3676	3677	3678 BM	3678 Thymus	3679	3680	3683	3684	3689	3690	3691	5158	7821	7928	8387	Number of mice with at least one mutation in gene
Leukemia Type	T-ALL	T-ALL	T-ALL	T-ALL	T-ALL	T-ALL	B-ALL	T-ALL	T-ALL	B-ALL	T-ALL	T-ALL	T-ALL	T-ALL	T-ALL	T-ALL	T-ALL	T-ALL	T-ALL	T-ALL	T-ALL	B-ALL
Ikzf1	X				XX				X	X	XX	X	X		X	XX	X			X	X		12
Notch1		X			XX	X		XX				X	X	X	X	X				X	XX	X	12
Bcl11b		XXX		XXX					X		X	XXXX	XXXXX			XX		XX	XX				9
Trp53					X				X	XX	X			X	XX	X			X			X	9
Kmt2D		X							X	XXX	X	X			X	X	XX						8
Nf1	X	XXX		XXXXX			X				X	X					X					X	8
Ciita	X	X	X	X			X							X					X				7
Kras		X				X		X					X			X		X	X				7
Map3K6							X	X		X		X			XXX		X	X					7
Bcorl1		X					XXX	X	X									X		X			6
Ddx3X									X			X		X	X					X		X	6
Dot1L				X	X					X	X			XXX						X			6
Igf1R	X		X						X		X	X						X					6
Mtor		X				X					X	X		X						X			6
Myo18A									X	X		X		XX		X	X						6
Notch2	X	X							X			X			X							X	6
Pten			X		X				X		XXX	XX						X					6
Tcf3		X		X								X		X		X						X	6
Flt1	X							X		X							X					XX	5
Flt4	X				X								X			X						X	5
Jarid2					X		X							X	X			X					5
Map3k1		XXXX					X		X			X										X	5
Mki67		XX		X						X		XX		X									5
Msh3	X			X									X				X	X					5
Nod1		X								X	X	XXX			X								5
Pclo		X														X	X				XX	X	5
Reln		XX	X									XX						X	X				5
Spen	X						X					X		X		XX							5
Stat5A											X	X	X	X	X								5
Atm		X			X			X				X											4
Bcl6	X								X			X			XX								4
Cdh1				X	X						X				X								4
Cic											X	X						X			X		4
Ctnna1		X		X										X								X	4
Dnm2												X			X	X						XX	4
Dtx1		X						X		XX		X											4
Egfr		X						X						X				X					4
Erbb2		X		X			X					X											4
Erbb3		X		X								XX						XX					4
Fgfr2		X		X								X	X										4
Hdac7	X	XX										X		X									4
Irf4	X				XX		X		X														4
Jak3							XXX							X	X	X							4
Ncor2		XX			X					XX				X									4
Pbrm1								X		X				X								XX	4
Ptch1		X					X		X											X			4
Rara							X				X			X				X					4
Rptor							X	X					X					X					4
Smc1A					X				X			X						X					4
Alk		X							X							X							3
Araf				X		X															X		3
Arid1A							X	X				X											3
Aurkb								X								X						X	3
Axin1				X	X													X					3
Bach1														X				X		X			3
Bcor											X					X				X			3
Brca2		X			XX										X								3
Brsk1									X		X					X							3
Card11		X												X				X					3
Csf1R	X									X					X								3
Cux1														X				XX				X	3
Daxx	X						X															X	3
Ep300				X								X										X	3
Epha5		X												X			X						3
Ephb1								X							X				X				3
Erbb4												X								X		X	3
Fgfr3		X										X				X							3
Foxo1				X				X						X									3
Gna11			XX									X										X	3
Gnas							X		X	X													3
Hnf1A				XX				X	X														3
Kdm5A	X							X	XX														3
Kmt2C				X										X								X	3
Lrp1B										X											X	X	3
Lrrk2		XXXX													X					X			3
Map3k14	X			X				X															3
Med12							X	X				X											3
Met					X										X		X						3
Nup98									X			X										X	3
Pik3Cg	X													XXX							X		3
Plcg2								X								X		X					3
Ptpn11			X						X					X									3
Rb1												X		X								X	3
Rnf43		X					X									X							3
Ros1		X					X				X												3
Smo											X			X				X					3
Taf1							X					X					X						3
Tgfbr2	X						X					X											3
Traf5									X		X						X						3
Tsc1		X												X						X			3
Whsc1									X								X			X			3
Amer1																X		X					2
Arhgap26								X					X										2
Asxl1																		X				X	2
Atrx							X		X														2
Aurka				X														X					2
Cd22								X				X											2
Cd79B				X													X						2
Chd2		X														X							2
Chek1								X								X							2
Ddr2					X													X					2
Epha3		X								X													2
Epha7					X						X												2
Fanca	X																			XX			2
Fancd2				X												X							2
Fbxw7		XX						X															2
Fgfr1		XX												XX									2
Fhit		X		X																			2
Flcn								X												X			2
Flt3			X													X							2
Foxo3								XX						X									2
Gata3									X			X											2
Idh2							X										X						2
Ikbke							X						X										2
Ikzf3							X		X														2
Irf8							X							X									2
Jak2		X										X											2
Kat6A														X						X			2
Kdm2B	X						X																2
Malt1										X		X											2
Mpl												X		X									2
Nsd1									X			XXX											2
Ntrk1							X		X														2
Ntrk2				X														X					2
Pag1											X			X									2
Pdcd11							XX							X									2
Pdgfra															X		X						2
Pdgfrb				X			X																2
Phf6												X										X	2
Pik3R2										X		X											2
Prdm1		X													X								2
Prss8										X								X					2
Ptpn6				X	X																		2
Rad50	X						X																2
Rasgef1A		X					XX																2
Ret		X																				X	2
Rictor								XXX				X											2
Setbp1							X															X	2
Setd2												X			X								2
Sox10				X					X														2
Tll2																		X				X	2
Tnfaip3												X			X								2
Traf2			X											X									2
Tsc2							X				X												2
Tyk2						X		XX															2
Zmym3	X																	X					2
Zrsr2		X										X											2
Actb								X															1
Akt1																						X	1
Akt3												X											1
Apc		X																					1
Arid2									X														1
Atr																		X					1
Axl																				X			1
B2M										X													1
Bap1										X													1
Bard1		X																					1
Bcl10												X											1
Birc3											X												1
Braf																		X					1
Brca1										X													1
Brd4												XX											1
Brip1															X								1
Cad												X											1
Calr																						X	1
Cbl								X															1
Cd36		X																					1
Cdc73												X											1
Chek2																						X	1
Crlf2										X													1
Ctcf														X									1
Cxcr4								X															1
Dnmt3A									X														1
Ect2L															X								1
Elp2																						X	1
Emsy												X											1
Erg				X																			1
Ezh2																					X		1
Faf1														X									1
Fancc								X															1
Fance		X																					1
Fancf																X							1
Fancl		X																					1
Fgf10																	X						1
Fgfr4		X																					1
Flywch1																			X				1
Foxp1																						X	1
Gid4							X																1
Gna13																					X		1
Grin2A													X										1
Gsk3B																						X	1
Gtse1										X													1
Hdac1																X							1
Hdac4		X																					1
Hist1H2Ac										X													1
Hras							XX																1
Hsp90Aa1																	X						1
Id3																		X					1
Ikzf2												X											1
Inpp5D	XX																						1
Irs2		X																					1
Kdm4C																X							1
Kdm6A		X																					1
Kdr							X																1
Keap1				X																			1
Kit														X									1
Maged1									X														1
Map2K2											X												1
Map2K4										XX													1
Mef2B		X																					1
Mib1																						X	1
Mitf															X								1
Mutyh																X							1
Myd88																					X		1
Nfe2L2															X								1
Nras								X															1
Ntrk3		X																					1
Palb2								X															1
Pax5							XX																1
Pik3Ca							X																1
Ptpro																						X	1
Runx1		X																					1
S1Pr2																						X	1
Sdhb																X							1
Sdhc																	X						1
Sgk1															X								1
Smad4		X																					1
Smarca4														X									1
Smarcb1																		X					1
Socs3												X											1
Src															X								1
Stat3																	XX						1
Stat4									X														1
Stat5B																						XX	1
Stat6	X																						1
Stk11																		X					1
Tet2												XX											1
Tnfrsf17			X																				1
Tshr																				X			1
U2Af2										X													1
Wt1		X																					1
Abl1																							0
Akt2																							0
Aph1A																							0
Ar																							0
Arfrp1																							0
Asmtl																							0
Bcl2																							0
Bcl2L2																							0
Bcl7A																							0
Blm																							0
Btg2																							0
Btk																							0
Btla																							0
C11Orf30																							0
C17Orf39																							0
Cbfb																							0
Ccnd1																							0
Ccnd2																							0
Ccnd3																							0
Ccne1																							0
Cct6B																							0
Cd274																							0
Cd58																							0
Cd70																							0
Cd79A																							0
Cdk12																							0
Cdk4																							0
Cdk6																							0
Cdk8																							0
Cdkn1B																							0
Cdkn2A																							0
Cdkn2B																							0
Cdkn2C																							0
Cebpa																							0
Cks1B																							0
Cps1																							0
Crebbp																							0
Crkl																							0
Csf3R																							0
Ctnnb1																							0
Dusp2																							0
Dusp9																							0
E2A																							0
Ebf1																							0
Eed																							0
Esr1																							0
Ets1																							0
Etv6																							0
Exosc6																							0
Fam123B																							0
Fam46C																							0
Fancg																							0
Fas																							0
Fbxo11																							0
Fbxo31																							0
Fgf14																							0
Fgf19																							0
Fgf23																							0
Fgf3																							0
Fgf4																							0
Fgf6																							0
Foxl2																							0
Frs2																							0
Gadd45B																							0
Gata1																							0
Gata2																							0
Gna12																							0
Gnaq																							0
Gpr124																							0
Graf																							0
Hgf																							0
Hist1H1C																							0
Hist1H1D																							0
Hist1H1E																							0
Hist1H2Ag																							0
Hist1H2Al																							0
Hist1H2Am																							0
Hist1H2Bc																							0
Hist1H2Bj																							0
Hist1H2Bk																							0
Hist1H2Bo																							0
Hist1H3B																							0
Ick																							0
Idh1																							0
Il7R																							0
Inhba																							0
Inpp4B																							0
Irf1																							0
Jak1																							0
Jun																							0
Kdm5C																							0
Klhl6																							0
Kmt2A																							0
Lef1																							0
Maf																							0
Mafb																							0
Map2K1																							0
Map3K7																							0
Mapk1																							0
Mcl1																							0
Mdm2																							0
Mdm4																							0
Mef2C																							0
Mek1																							0
Mek2																							0
Men1																							0
Mlh1																							0
Mll																							0
Mll2																							0
Mll3																							0
Mmset																							0
Mre11A																							0
Msh2																							0
Msh6																							0
Myc																							0
Mycl																							0
Mycl1																							0
Mycn																							0
Myst3																							0
Ncstn																							0
Nf2																							0
Nfkbia																							0
Nkx2-1																							0
Npm1																							0
Nsd2																							0
Nt5C2																							0
Nup93																							0
P2Ry8																							0
Pak3																							0
Pask																							0
Pc																							0
Pcbp1																							0
Pd-1																							0
Pdcd1																							0
Pdcd1Lg2																							0
Pdk1																							0
Pd-L1																							0
Pd-L2																							0
Pik3R1																							0
Pim1																							0
Pot1																							0
Ppp2R1A																							0
Prkar1A																							0
Prkdc																							0
Ptpn2																							0
Rad21																							0
Rad51																							0
Raf1																							0
Rhoa																							0
Sdha																							0
Sdhd																							0
Serp2																							0
Sf3B1																							0
Ship																							0
Shp-1																							0
Smad2																							0
Smarca1																							0
Smc3																							0
Socs1																							0
Socs2																							0
Sox2																							0
Spop																							0
Srsf2																							0
Stag2																							0
Sufu																							0
Suz12																							0
Tbl1Xr1																							0
Tcl1																							0
Tcl1A																							0
Tmem30A																							0
Tmsb4Xp8																							0
Tmsl3																							0
Tnfrsf11A																							0
Tnfrsf14																							0
Tnfrsf6																							0
Top1																							0
Tp53																							0
Tp63																							0
Traf3																							0
Tusc3																							0
U2Af1																							0
Vhl																							0
Wdr90																							0
Wisp3																							0
Xbp1																							0
Xpo1																							0
Yy1Ap1																							0
Znf217																							0
Znf24																							0
Znf703																							0
Zscan3																							0
