# Supplementary material for: 5-Aza-4’-thio-2’-deoxycytidine induces C&gt;G transversions in a specific trinucleotide context and leads to acute lymphoid leukemia
Source: Research Square preprint supplement (doi:10.21203/rs.3.rs-3186246/v1), 2023-12-19
Supplement: Supplementary file 9 [file 9bbf14124eb10eb85a4b316e.xlsx]

## Sheet: Sheet1
SampleName	Chr	Start	End	REF	ALT	Gene_Name	HGVS.c	HGVS.p	Annotation	Annotation_Impact	DP_NORMAL	AD_NORMAL.2	AF_NORMAL	DP_TUMOR	AD_TUMOR.2	AF_TUMOR	LOG_FISHER
Aplan_7298_NR_1000nM_C1_vs_Aplan_7298_NR_Parent	chr1	12989787	12989787	C	G	Slco5a1	c.709G>C	p.Asp237His	missense_variant	MODERATE	46	0	0.022	56	11	0.218	3.04063
Aplan_7298_NR_1000nM_C1_vs_Aplan_7298_NR_Parent	chr1	23379010	23379011	CA	GG	Ogfrl1	c.285_286delTGinsCC	p.Ala96Pro	missense_variant	MODERATE	62	0	0.02	75	24	0.318	6.45994
Aplan_7298_NR_1000nM_C1_vs_Aplan_7298_NR_Parent	chr1	32519907	32519907	T	C	Gm9839	c.1093A>G	p.Arg365Gly	missense_variant	MODERATE	223	0	0.005078	280	75	0.264	5.98248
Aplan_7298_NR_1000nM_C1_vs_Aplan_7298_NR_Parent	chr1	34443694	34443694	C	G	Imp4	c.438C>G	p.Pro146Pro	splice_region_variant&synonymous_variant	LOW	64	0	0.016	85	25	0.303	6.18437
Aplan_7298_NR_1000nM_C1_vs_Aplan_7298_NR_Parent	chr1	37380066	37380066	C	G	Inpp4a	c.1726C>G	p.Arg576Gly	missense_variant	MODERATE	40	0	0.027	33	7	0.219	2.58138
Aplan_7298_NR_1000nM_C1_vs_Aplan_7298_NR_Parent	chr1	38874024	38874024	C	G	Chst10	c.171G>C	p.Gln57His	missense_variant	MODERATE	74	0	0.016	59	15	0.259	5.7843
Aplan_7298_NR_1000nM_C1_vs_Aplan_7298_NR_Parent	chr1	45332173	45332173	C	T	Col3a1	c.1383C>T	p.Gly461Gly	synonymous_variant	LOW	38	0	0.028	36	9	0.271	3.06967
Aplan_7298_NR_1000nM_C1_vs_Aplan_7298_NR_Parent	chr1	46457228	46457228	G	C	Dnah7c	c.272G>C	p.Arg91Pro	missense_variant	MODERATE	103	0	0.011	137	26	0.203	6.17519
Aplan_7298_NR_1000nM_C1_vs_Aplan_7298_NR_Parent	chr1	53913314	53913314	G	C	Hecw2	c.2759C>G	p.Thr920Arg	missense_variant	MODERATE	51	0	0.021	48	9	0.214	3.01374
Aplan_7298_NR_1000nM_C1_vs_Aplan_7298_NR_Parent	chr1	60125991	60125991	C	G	Carf	c.436C>G	p.Arg146Gly	missense_variant	MODERATE	45	0	0.026	60	15	0.255	3.94243
Aplan_7298_NR_1000nM_C1_vs_Aplan_7298_NR_Parent	chr1	66845285	66845285	G	C	Acadl	c.651C>G	p.Ala217Ala	synonymous_variant	LOW	170	0	0.006598	165	33	0.21	6.32087
Aplan_7298_NR_1000nM_C1_vs_Aplan_7298_NR_Parent	chr1	72629437	72629437	C	G	Smarcal1	c.2465C>G	p.Ser822Trp	missense_variant	MODERATE	43	0	0.026	54	13	0.235	3.37334
Aplan_7298_NR_1000nM_C1_vs_Aplan_7298_NR_Parent	chr1	75384659	75384659	C	T	Speg	c.398C>T	p.Ser133Leu	missense_variant	MODERATE	125	0	0.00968	94	24	0.26	6.15605
Aplan_7298_NR_1000nM_C1_vs_Aplan_7298_NR_Parent	chr1	75385155	75385155	C	T	Speg	c.812C>T	p.Ser271Leu	missense_variant	MODERATE	19	0	0.053	19	7	0.369	2.09771
Aplan_7298_NR_1000nM_C1_vs_Aplan_7298_NR_Parent	chr1	75482831	75482831	G	C	Tmem198	c.429G>C	p.Pro143Pro	synonymous_variant	LOW	40	0	0.026	34	6	0.226	2.13907
Aplan_7298_NR_1000nM_C1_vs_Aplan_7298_NR_Parent	chr1	82653348	82653348	C	G	Col4a3	c.516C>G	p.Asp172Glu	missense_variant	MODERATE	31	0	0.039	42	10	0.242	2.41994
Aplan_7298_NR_1000nM_C1_vs_Aplan_7298_NR_Parent	chr1	86173599	86173599	G	C	Armc9	c.668G>C	p.Arg223Pro	missense_variant	MODERATE	41	0	0.03	28	8	0.333	3.42979
Aplan_7298_NR_1000nM_C1_vs_Aplan_7298_NR_Parent	chr1	86387896	86387896	G	C	Nmur1	c.315C>G	p.Ser105Ser	synonymous_variant	LOW	62	0	0.018	58	15	0.281	5.20138
Aplan_7298_NR_1000nM_C1_vs_Aplan_7298_NR_Parent	chr1	87470361	87470361	G	C	3110079O15Rik	c.23G>C	p.Arg8Pro	missense_variant	MODERATE	100	0	0.012	67	24	0.362	6.44874
Aplan_7298_NR_1000nM_C1_vs_Aplan_7298_NR_Parent	chr1	87503520	87503520	G	C	Ngef	c.574C>G	p.Arg192Gly	missense_variant	MODERATE	18	0	0.056	12	5	0.429	2.25511
Aplan_7298_NR_1000nM_C1_vs_Aplan_7298_NR_Parent	chr1	90828409	90828409	G	C	Col6a3	c.157C>G	p.Arg53Gly	missense_variant	MODERATE	66	0	0.016	80	21	0.246	5.95843
Aplan_7298_NR_1000nM_C1_vs_Aplan_7298_NR_Parent	chr1	92888530	92888530	C	G	Ankmy1	c.861G>C	p.Pro287Pro	synonymous_variant	LOW	65	0	0.018	71	13	0.213	3.81234
Aplan_7298_NR_1000nM_C1_vs_Aplan_7298_NR_Parent	chr1	93025640	93025640	G	C	Kif1a	c.3824C>G	p.Thr1275Arg	missense_variant	MODERATE	47	0	0.023	30	9	0.296	4.05214
Aplan_7298_NR_1000nM_C1_vs_Aplan_7298_NR_Parent	chr1	104954057	104954057	C	G	Cdh20	c.1246C>G	p.Pro416Ala	missense_variant	MODERATE	119	0	0.009966	123	29	0.226	6.35958
Aplan_7298_NR_1000nM_C1_vs_Aplan_7298_NR_Parent	chr1	105819911	105819911	C	G	Tnfrsf11a	c.566C>G	p.Thr189Arg	missense_variant	MODERATE	21	0	0.048	25	9	0.375	2.67343
Aplan_7298_NR_1000nM_C1_vs_Aplan_7298_NR_Parent	chr1	105827246	105827246	C	G	Tnfrsf11a	c.1042C>G	p.Arg348Gly	missense_variant	MODERATE	82	0	0.013	83	17	0.23	5.21236
Aplan_7298_NR_1000nM_C1_vs_Aplan_7298_NR_Parent	chr1	119527300	119527300	C	G	Tmem185b	c.790C>G	p.Arg264Gly	missense_variant	MODERATE	98	0	0.011	133	39	0.304	6.24921
Aplan_7298_NR_1000nM_C1_vs_Aplan_7298_NR_Parent	chr1	120150670	120150670	G	C	3110009E18Rik	c.56G>C	p.Arg19Pro	missense_variant	MODERATE	79	0	0.015	81	16	0.225	4.86689
Aplan_7298_NR_1000nM_C1_vs_Aplan_7298_NR_Parent	chr1	128304287	128304288	CG	C	Lct	c.1823delC	p.Ala608fs	frameshift_variant	HIGH	25	0	0.044	22	5	0.261	1.76529
Aplan_7298_NR_1000nM_C1_vs_Aplan_7298_NR_Parent	chr1	130702305	130702305	G	C	Pfkfb2	c.772C>G	p.Arg258Gly	missense_variant	MODERATE	33	0	0.031	24	8	0.321	3.35155
Aplan_7298_NR_1000nM_C1_vs_Aplan_7298_NR_Parent	chr1	130878324	130878324	G	C	Fcmr	c.1016G>C	p.Arg339Pro	missense_variant	MODERATE	50	0	0.021	34	12	0.333	5.31399
Aplan_7298_NR_1000nM_C1_vs_Aplan_7298_NR_Parent	chr1	131758536	131758536	C	G	Slc26a9	c.1167C>G	p.Cys389Trp	missense_variant	MODERATE	125	0	0.009627	110	27	0.27	6.37006
Aplan_7298_NR_1000nM_C1_vs_Aplan_7298_NR_Parent	chr1	135272464	135272464	G	C	Rnpep	c.752C>G	p.Ala251Gly	missense_variant	MODERATE	70	0	0.017	74	20	0.25	6.30476
Aplan_7298_NR_1000nM_C1_vs_Aplan_7298_NR_Parent	chr1	135746812	135746812	C	G	Csrp1	c.374C>G	p.Ala125Gly	missense_variant	MODERATE	78	0	0.016	81	19	0.269	5.91556
Aplan_7298_NR_1000nM_C1_vs_Aplan_7298_NR_Parent	chr1	135908915	135908915	G	C	Pkp1	c.270C>G	p.Phe90Leu	missense_variant	MODERATE	51	0	0.024	50	12	0.295	3.99208
Aplan_7298_NR_1000nM_C1_vs_Aplan_7298_NR_Parent	chr1	136079511	136079511	G	C	Cacna1s	c.1265G>C	p.Arg422Pro	missense_variant	MODERATE	56	0	0.018	86	25	0.314	5.85102
Aplan_7298_NR_1000nM_C1_vs_Aplan_7298_NR_Parent	chr1	136144735	136144735	C	G	Kif21b	c.178C>G	p.Gln60Glu	missense_variant	MODERATE	12	0	0.071	28	11	0.385	1.76849
Aplan_7298_NR_1000nM_C1_vs_Aplan_7298_NR_Parent	chr1	139489671	139489671	G	C	Aspm	c.8405G>C	p.Arg2802Pro	missense_variant	MODERATE	50	0	0.02	54	13	0.264	3.92228
Aplan_7298_NR_1000nM_C1_vs_Aplan_7298_NR_Parent	chr1	150374835	150374835	G	C	BC003331	c.957C>G	p.Leu319Leu	synonymous_variant	LOW	70	0	0.016	129	29	0.245	5.59175
Aplan_7298_NR_1000nM_C1_vs_Aplan_7298_NR_Parent	chr1	150609700	150609700	G	C	Hmcn1	c.13150C>G	p.Arg4384Gly	missense_variant	MODERATE	46	0	0.025	51	9	0.203	2.53765
Aplan_7298_NR_1000nM_C1_vs_Aplan_7298_NR_Parent	chr1	152508553	152508553	C	G	Colgalt2	c.1643C>G	p.Ala548Gly	missense_variant	MODERATE	48	0	0.021	54	11	0.23	3.17774
Aplan_7298_NR_1000nM_C1_vs_Aplan_7298_NR_Parent	chr1	153850955	153850955	C	G	Teddm2	c.172G>C	p.Gly58Arg	missense_variant	MODERATE	96	0	0.012	111	34	0.284	6.07112
Aplan_7298_NR_1000nM_C1_vs_Aplan_7298_NR_Parent	chr1	156687389	156687389	G	C	Fam20b	c.905C>G	p.Ala302Gly	missense_variant	MODERATE	60	0	0.017	76	25	0.32	6.06849
Aplan_7298_NR_1000nM_C1_vs_Aplan_7298_NR_Parent	chr1	157567301	157567301	G	C	Sec16b	c.3110G>C	p.Arg1037Pro	missense_variant	MODERATE	72	0	0.017	44	9	0.2	4.03156
Aplan_7298_NR_1000nM_C1_vs_Aplan_7298_NR_Parent	chr1	159889330	159889330	C	T	Tnr	c.2754C>T	p.Phe918Phe	synonymous_variant	LOW	45	0	0.025	42	8	0.216	2.69467
Aplan_7298_NR_1000nM_C1_vs_Aplan_7298_NR_Parent	chr1	160738890	160738890	C	G	Rabgap1l	c.331+6G>C		splice_region_variant&intron_variant	LOW	42	0	0.024	59	16	0.273	3.88973
Aplan_7298_NR_1000nM_C1_vs_Aplan_7298_NR_Parent	chr1	161060737	161060737	G	C	Dars2	c.612C>G	p.His204Gln	missense_variant&splice_region_variant	MODERATE	47	0	0.025	48	10	0.233	2.93565
Aplan_7298_NR_1000nM_C1_vs_Aplan_7298_NR_Parent	chr1	165896460	165896460	C	G	Pou2f1	c.1255G>C	p.Ala419Pro	missense_variant	MODERATE	54	0	0.022	48	13	0.299	4.68556
Aplan_7298_NR_1000nM_C1_vs_Aplan_7298_NR_Parent	chr1	166100573	166100573	C	G	Dusp27	c.1469G>C	p.Arg490Pro	missense_variant	MODERATE	137	0	0.007828	122	30	0.251	6.10547
Aplan_7298_NR_1000nM_C1_vs_Aplan_7298_NR_Parent	chr1	169522363	169522363	G	C	Nuf2	c.337+8C>G		splice_region_variant&intron_variant	LOW	42	0	0.027	79	16	0.2	2.94751
Aplan_7298_NR_1000nM_C1_vs_Aplan_7298_NR_Parent	chr1	170212294	170212294	G	C	Uhmk1	c.503C>G	p.Ala168Gly	missense_variant	MODERATE	34	0	0.032	41	11	0.295	3.15278
Aplan_7298_NR_1000nM_C1_vs_Aplan_7298_NR_Parent	chr1	171125089	171125089	C	G	Cfap126	c.83C>G	p.Thr28Arg	missense_variant	MODERATE	125	0	0.008858	129	40	0.292	6.24796
Aplan_7298_NR_1000nM_C1_vs_Aplan_7298_NR_Parent	chr1	171360412	171360412	C	G	Klhdc9	c.250G>C	p.Ala84Pro	missense_variant	MODERATE	31	0	0.032	40	7	0.2	1.79598
Aplan_7298_NR_1000nM_C1_vs_Aplan_7298_NR_Parent	chr1	171529145	171529145	C	G	Itln1	c.765G>C	p.Arg255Ser	missense_variant	MODERATE	59	0	0.02	54	13	0.271	4.53964
Aplan_7298_NR_1000nM_C1_vs_Aplan_7298_NR_Parent	chr1	172006281	172006281	G	C	Vangl2	c.1114C>G	p.Arg372Gly	missense_variant	MODERATE	52	0	0.02	46	13	0.309	4.72268
Aplan_7298_NR_1000nM_C1_vs_Aplan_7298_NR_Parent	chr1	172009487	172009487	G	C	Vangl2	c.754C>G	p.Arg252Gly	missense_variant	MODERATE	71	1	0.019	79	23	0.296	5.70729
Aplan_7298_NR_1000nM_C1_vs_Aplan_7298_NR_Parent	chr1	172054038	172054038	C	G	Nhlh1	c.260G>C	p.Arg87Pro	missense_variant	MODERATE	30	0	0.037	28	7	0.282	2.40473
Aplan_7298_NR_1000nM_C1_vs_Aplan_7298_NR_Parent	chr1	172068281	172068281	C	G	Ncstn	c.1549-8G>C		splice_region_variant&intron_variant	LOW	88	0	0.012	85	16	0.209	5.28157
Aplan_7298_NR_1000nM_C1_vs_Aplan_7298_NR_Parent	chr1	172113215	172113215	G	C	Copa	c.2167G>C	p.Ala723Pro	missense_variant&splice_region_variant	MODERATE	101	0	0.011	93	20	0.205	6.04043
Aplan_7298_NR_1000nM_C1_vs_Aplan_7298_NR_Parent	chr1	172280039	172280039	G	C	Atp1a2	c.2012C>G	p.Thr671Arg	missense_variant	MODERATE	50	0	0.022	51	12	0.25	3.6289
Aplan_7298_NR_1000nM_C1_vs_Aplan_7298_NR_Parent	chr1	172369016	172369016	G	C	Kcnj10	c.96G>C	p.Thr32Thr	synonymous_variant	LOW	72	0	0.016	61	17	0.273	6.36089
Aplan_7298_NR_1000nM_C1_vs_Aplan_7298_NR_Parent	chr1	172377320	172377320	C	T	Pigm	c.622C>T	p.Arg208Trp	missense_variant	MODERATE	111	0	0.009534	92	19	0.228	7.0205
Aplan_7298_NR_1000nM_C1_vs_Aplan_7298_NR_Parent	chr1	173644716	173644716	C	G	Pyhin1	c.1122C>G	p.Val374Val	synonymous_variant	LOW	114	0	0.01	160	40	0.255	5.96986
Aplan_7298_NR_1000nM_C1_vs_Aplan_7298_NR_Parent	chr1	176782408	176782408	G	C	Cep170	c.336C>G	p.His112Gln	missense_variant&splice_region_variant	MODERATE	83	0	0.014	110	25	0.238	5.94798
Aplan_7298_NR_1000nM_C1_vs_Aplan_7298_NR_Parent	chr1	180893391	180893391	G	C	Lefty2	c.208G>C	p.Ala70Pro	missense_variant	MODERATE	39	0	0.027	35	10	0.305	3.59255
Aplan_7298_NR_1000nM_C1_vs_Aplan_7298_NR_Parent	chr1	181836228	181836228	G	C	Lbr	c.226C>G	p.Arg76Gly	missense_variant	MODERATE	136	0	0.00798	143	39	0.269	5.90977
Aplan_7298_NR_1000nM_C1_vs_Aplan_7298_NR_Parent	chr1	184074469	184074469	C	G	Dusp10	c.1398C>G	p.Gly466Gly	synonymous_variant	LOW	81	0	0.014	72	21	0.31	5.9469
Aplan_7298_NR_1000nM_C1_vs_Aplan_7298_NR_Parent	chr1	187233179	187233179	C	G	Gpatch2	c.881C>G	p.Ala294Gly	missense_variant	MODERATE	42	1	0.031	40	12	0.31	3.21455
Aplan_7298_NR_1000nM_C1_vs_Aplan_7298_NR_Parent	chr1	191177465	191177465	C	G	Atf3	c.6G>C	p.Met2Ile	missense_variant	MODERATE	34	0	0.033	35	13	0.361	4.20617
Aplan_7298_NR_1000nM_C1_vs_Aplan_7298_NR_Parent	chr1	193161630	193161630	C	G	Irf6	c.192C>G	p.Thr64Thr	synonymous_variant	LOW	24	0	0.053	15	5	0.374	2.28268
Aplan_7298_NR_1000nM_C1_vs_Aplan_7298_NR_Parent	chr2	18732128	18732128	C	G	Spag6	c.661C>G	p.Pro221Ala	missense_variant	MODERATE	63	0	0.017	75	15	0.209	4.25842
Aplan_7298_NR_1000nM_C1_vs_Aplan_7298_NR_Parent	chr2	24962546	24962546	C	G	Dph7	c.68C>G	p.Ser23Trp	missense_variant	MODERATE	37	0	0.027	30	8	0.283	3.04703
Aplan_7298_NR_1000nM_C1_vs_Aplan_7298_NR_Parent	chr2	25087018	25087018	G	C	Noxa1	c.740C>G	p.Thr247Arg	missense_variant	MODERATE	50	0	0.024	46	9	0.226	3.07072
Aplan_7298_NR_1000nM_C1_vs_Aplan_7298_NR_Parent	chr2	25181335	25181335	C	G	Nrarp	c.225C>G	p.Ala75Ala	synonymous_variant	LOW	49	0	0.02	54	13	0.254	3.89258
Aplan_7298_NR_1000nM_C1_vs_Aplan_7298_NR_Parent	chr2	25305381	25305381	G	C	Grin1	c.697C>G	p.Arg233Gly	missense_variant	MODERATE	56	0	0.019	44	11	0.239	4.2664
Aplan_7298_NR_1000nM_C1_vs_Aplan_7298_NR_Parent	chr2	25440720	25440720	G	C	Abca2	c.3507G>C	p.Pro1169Pro	splice_region_variant&synonymous_variant	LOW	57	0	0.019	52	13	0.265	4.56609
Aplan_7298_NR_1000nM_C1_vs_Aplan_7298_NR_Parent	chr2	25458642	25458642	G	C	Clic3	c.633G>C	p.Leu211Phe	missense_variant	MODERATE	139	0	0.008191	124	37	0.31	5.82443
Aplan_7298_NR_1000nM_C1_vs_Aplan_7298_NR_Parent	chr2	25499394	25499394	G	A	C8g	c.454+4C>T		splice_region_variant&intron_variant	LOW	91	0	0.013	96	25	0.257	6.3932
Aplan_7298_NR_1000nM_C1_vs_Aplan_7298_NR_Parent	chr2	25578873	25578873	C	G	Gm996	c.1025G>C	p.Arg342Pro	missense_variant	MODERATE	161	1	0.007109	132	44	0.348	6.39724
Aplan_7298_NR_1000nM_C1_vs_Aplan_7298_NR_Parent	chr2	25579555	25579555	G	C	Gm996	c.343C>G	p.Arg115Gly	missense_variant	MODERATE	70	0	0.015	42	12	0.292	5.60144
Aplan_7298_NR_1000nM_C1_vs_Aplan_7298_NR_Parent	chr2	26203155	26203155	G	C	Lhx3	c.288C>G	p.Ala96Ala	synonymous_variant	LOW	30	0	0.034	17	6	0.368	2.93833
Aplan_7298_NR_1000nM_C1_vs_Aplan_7298_NR_Parent	chr2	26943193	26943193	C	G	Stkld1	c.366C>G	p.Ile122Met	missense_variant	MODERATE	105	0	0.012	95	23	0.254	6.44805
Aplan_7298_NR_1000nM_C1_vs_Aplan_7298_NR_Parent	chr2	27024711	27024711	G	C	Slc2a6	c.642C>G	p.Pro214Pro	synonymous_variant	LOW	23	0	0.044	25	9	0.399	2.76817
Aplan_7298_NR_1000nM_C1_vs_Aplan_7298_NR_Parent	chr2	29133949	29133949	G	C	Setx	c.416G>C	p.Arg139Pro	missense_variant	MODERATE	94	0	0.013	144	34	0.253	6.24312
Aplan_7298_NR_1000nM_C1_vs_Aplan_7298_NR_Parent	chr2	29144193	29144193	G	C	Setx	c.1026G>C	p.Pro342Pro	synonymous_variant	LOW	59	0	0.017	99	29	0.317	6.19914
Aplan_7298_NR_1000nM_C1_vs_Aplan_7298_NR_Parent	chr2	29707337	29707337	C	G	Rapgef1	c.1821C>G	p.Cys607Trp	missense_variant	MODERATE	48	0	0.023	42	11	0.275	3.98764
Aplan_7298_NR_1000nM_C1_vs_Aplan_7298_NR_Parent	chr2	29872825	29872825	G	C	Cercam	c.570G>C	p.Thr190Thr	synonymous_variant	LOW	94	0	0.012	85	17	0.209	5.90256
Aplan_7298_NR_1000nM_C1_vs_Aplan_7298_NR_Parent	chr2	30879662	30879662	C	G	Prrx2	c.600C>G	p.Ser200Ser	synonymous_variant	LOW	45	0	0.026	38	10	0.262	3.71141
Aplan_7298_NR_1000nM_C1_vs_Aplan_7298_NR_Parent	chr2	31790788	31790788	C	G	Abl1	c.1091C>G	p.Thr364Arg	missense_variant	MODERATE	43	0	0.029	35	11	0.333	4.27053
Aplan_7298_NR_1000nM_C1_vs_Aplan_7298_NR_Parent	chr2	31801858	31801858	C	G	Abl1	c.3388C>G	p.Leu1130Val	missense_variant	MODERATE	23	0	0.043	34	12	0.382	3.07458
Aplan_7298_NR_1000nM_C1_vs_Aplan_7298_NR_Parent	chr2	31834357	31834357	C	G	Fibcd1	c.638G>C	p.Arg213Pro	missense_variant	MODERATE	67	0	0.017	59	12	0.233	4.24035
Aplan_7298_NR_1000nM_C1_vs_Aplan_7298_NR_Parent	chr2	31887623	31887623	C	G	Lamc3	c.280C>G	p.Arg94Gly	missense_variant	MODERATE	33	0	0.031	33	10	0.338	3.05678
Aplan_7298_NR_1000nM_C1_vs_Aplan_7298_NR_Parent	chr2	32575902	32575902	C	G	Pip5kl1	c.30+8C>G		splice_region_variant&intron_variant	LOW	48	0	0.025	33	11	0.355	4.79689
Aplan_7298_NR_1000nM_C1_vs_Aplan_7298_NR_Parent	chr2	32749325	32749325	G	C	Sh2d3c	c.1422G>C	p.Ser474Ser	synonymous_variant	LOW	83	0	0.013	64	16	0.229	6.29988
Aplan_7298_NR_1000nM_C1_vs_Aplan_7298_NR_Parent	chr2	32762622	32762622	G	C	Ttc16	c.2194C>G	p.Arg732Gly	missense_variant	MODERATE	75	0	0.014	58	16	0.271	6.35011
Aplan_7298_NR_1000nM_C1_vs_Aplan_7298_NR_Parent	chr2	33336551	33336551	C	G	Ralgps1	c.127G>C	p.Val43Leu	missense_variant	MODERATE	126	0	0.01	86	17	0.21	7.11059
Aplan_7298_NR_1000nM_C1_vs_Aplan_7298_NR_Parent	chr2	38959717	38959717	C	G	Olfml2a	c.1444C>G	p.Arg482Gly	missense_variant&splice_region_variant	MODERATE	145	0	0.007881	154	32	0.204	5.98154
Aplan_7298_NR_1000nM_C1_vs_Aplan_7298_NR_Parent	chr2	53105579	53105579	G	C	Fmnl2	c.1313G>C	p.Arg438Pro	missense_variant&splice_region_variant	MODERATE	40	0	0.029	26	8	0.304	3.56542
Aplan_7298_NR_1000nM_C1_vs_Aplan_7298_NR_Parent	chr2	73353710	73353710	G	C	Gpr155	c.1914C>G	p.Leu638Leu	synonymous_variant	LOW	39	0	0.029	41	10	0.268	2.97183
Aplan_7298_NR_1000nM_C1_vs_Aplan_7298_NR_Parent	chr2	76733996	76733996	C	G	Ttn	c.80453G>C	p.Arg26818Pro	missense_variant	MODERATE	104	0	0.011	106	32	0.292	6.37356
Aplan_7298_NR_1000nM_C1_vs_Aplan_7298_NR_Parent	chr2	77045685	77045685	C	G	Ccdc141	c.2000G>C	p.Arg667Pro	missense_variant	MODERATE	71	0	0.015	91	33	0.352	6.02128
Aplan_7298_NR_1000nM_C1_vs_Aplan_7298_NR_Parent	chr2	85759803	85759803	C	G	Olfr1012	c.572G>C	p.Arg191Thr	missense_variant	MODERATE	106	0	0.009774	123	32	0.267	6.35669
Aplan_7298_NR_1000nM_C1_vs_Aplan_7298_NR_Parent	chr2	89752417	89752417	C	G	Olfr1253	c.410G>C	p.Arg137Pro	missense_variant	MODERATE	218	1	0.005023	260	71	0.277	5.89995
Aplan_7298_NR_1000nM_C1_vs_Aplan_7298_NR_Parent	chr2	91063064	91063064	C	G	Slc39a13	c.1049G>C	p.Trp350Ser	missense_variant&splice_region_variant	MODERATE	78	0	0.013	80	19	0.259	5.93732
Aplan_7298_NR_1000nM_C1_vs_Aplan_7298_NR_Parent	chr2	91939950	91939950	G	C	Dgkz	c.1552C>G	p.Arg518Gly	missense_variant	MODERATE	57	0	0.018	63	14	0.222	4.17169
Aplan_7298_NR_1000nM_C1_vs_Aplan_7298_NR_Parent	chr2	93956474	93956474	C	G	Gm13889	c.285G>C	p.Thr95Thr	synonymous_variant	LOW	41	0	0.027	32	7	0.258	2.68492
Aplan_7298_NR_1000nM_C1_vs_Aplan_7298_NR_Parent	chr2	97629242	97629242	C	G	Lrrc4c	c.212C>G	p.Pro71Arg	missense_variant	MODERATE	66	0	0.016	94	21	0.231	5.23732
Aplan_7298_NR_1000nM_C1_vs_Aplan_7298_NR_Parent	chr2	97630251	97630251	C	G	Lrrc4c	c.1221C>G	p.Ser407Arg	missense_variant	MODERATE	66	0	0.017	91	19	0.212	4.68042
Aplan_7298_NR_1000nM_C1_vs_Aplan_7298_NR_Parent	chr2	102450782	102450782	G	C	Fjx1	c.807C>G	p.Arg269Arg	synonymous_variant	LOW	59	0	0.018	73	15	0.213	3.94144
Aplan_7298_NR_1000nM_C1_vs_Aplan_7298_NR_Parent	chr2	118688845	118688845	C	G	Pak6	c.44C>G	p.Pro15Arg	missense_variant	MODERATE	45	0	0.028	47	9	0.204	2.58694
Aplan_7298_NR_1000nM_C1_vs_Aplan_7298_NR_Parent	chr2	118696493	118696493	C	G	Pak6	c.1968C>G	p.His656Gln	missense_variant	MODERATE	151	0	0.007678	125	29	0.215	6.39659
Aplan_7298_NR_1000nM_C1_vs_Aplan_7298_NR_Parent	chr2	118717390	118717390	C	G	Plcb2	c.1486+5G>C		splice_region_variant&intron_variant	LOW	113	0	0.009108	109	28	0.26	6.09022
Aplan_7298_NR_1000nM_C1_vs_Aplan_7298_NR_Parent	chr2	119327125	119327125	G	C	Dll4	c.397+5G>C		splice_region_variant&intron_variant	LOW	34	0	0.034	36	7	0.2	1.94115
Aplan_7298_NR_1000nM_C1_vs_Aplan_7298_NR_Parent	chr2	119812142	119812142	C	G	Tyro3	c.1806C>G	p.His602Gln	missense_variant	MODERATE	70	0	0.017	65	15	0.239	5.17118
Aplan_7298_NR_1000nM_C1_vs_Aplan_7298_NR_Parent	chr2	120464017	120464017	C	G	Capn3	c.145C>G	p.Arg49Gly	missense_variant	MODERATE	55	0	0.019	64	20	0.307	5.80937
Aplan_7298_NR_1000nM_C1_vs_Aplan_7298_NR_Parent	chr2	120464065	120464065	C	G	Capn3	c.193C>G	p.Arg65Gly	missense_variant	MODERATE	66	0	0.017	73	22	0.323	6.36738
Aplan_7298_NR_1000nM_C1_vs_Aplan_7298_NR_Parent	chr2	121925563	121925563	C	G	Casc4	c.1072C>G	p.Arg358Gly	missense_variant&splice_region_variant	MODERATE	18	0	0.053	27	9	0.307	2.17542
Aplan_7298_NR_1000nM_C1_vs_Aplan_7298_NR_Parent	chr2	122289342	122289342	G	C	Duox2	c.2604C>G	p.Asp868Glu	missense_variant	MODERATE	54	0	0.02	28	7	0.241	3.50662
Aplan_7298_NR_1000nM_C1_vs_Aplan_7298_NR_Parent	chr2	127337329	127337329	C	G	Dusp2	c.603C>G	p.Cys201Trp	missense_variant	MODERATE	52	0	0.021	47	13	0.288	4.6432
Aplan_7298_NR_1000nM_C1_vs_Aplan_7298_NR_Parent	chr2	127539249	127539249	C	G	Prom2	c.706G>C	p.Val236Leu	missense_variant	MODERATE	50	0	0.024	52	11	0.234	3.26064
Aplan_7298_NR_1000nM_C1_vs_Aplan_7298_NR_Parent	chr2	127541156	127541156	G	C	Prom2	c.165C>G	p.Arg55Arg	synonymous_variant	LOW	16	0	0.061	18	9	0.494	2.94117
Aplan_7298_NR_1000nM_C1_vs_Aplan_7298_NR_Parent	chr2	129208219	129208219	C	G	Slc20a1	c.1296C>G	p.Pro432Pro	synonymous_variant	LOW	112	0	0.009624	118	29	0.257	5.8423
Aplan_7298_NR_1000nM_C1_vs_Aplan_7298_NR_Parent	chr2	135262129	135262129	C	G	Plcb1	c.717C>G	p.Tyr239*	stop_gained	HIGH	37	0	0.032	46	12	0.292	3.37584
Aplan_7298_NR_1000nM_C1_vs_Aplan_7298_NR_Parent	chr2	135972997	135972997	G	T	Plcb4	c.2204G>T	p.Arg735Leu	missense_variant	MODERATE	13	0	0.072	21	6	0.302	1.20958
Aplan_7298_NR_1000nM_C1_vs_Aplan_7298_NR_Parent	chr2	148045857	148045857	G	C	Foxa2	c.57C>G	p.Ser19Ser	synonymous_variant	LOW	60	0	0.02	47	9	0.219	3.42016
Aplan_7298_NR_1000nM_C1_vs_Aplan_7298_NR_Parent	chr2	148675390	148675390	C	G	Nxt1	c.50C>G	p.Ala17Gly	missense_variant	MODERATE	93	0	0.012	113	29	0.242	6.60767
Aplan_7298_NR_1000nM_C1_vs_Aplan_7298_NR_Parent	chr2	151970070	151970070	C	G	Fam110a	c.779G>C	p.Arg260Pro	missense_variant	MODERATE	78	0	0.013	69	18	0.265	6.49794
Aplan_7298_NR_1000nM_C1_vs_Aplan_7298_NR_Parent	chr2	152829759	152829759	G	C	Bcl2l1	c.232C>G	p.Arg78Gly	missense_variant	MODERATE	69	0	0.015	78	15	0.214	4.37905
Aplan_7298_NR_1000nM_C1_vs_Aplan_7298_NR_Parent	chr2	152829811	152829811	C	G	Bcl2l1	c.180G>C	p.Ala60Ala	synonymous_variant	LOW	58	0	0.019	78	21	0.266	5.46144
Aplan_7298_NR_1000nM_C1_vs_Aplan_7298_NR_Parent	chr2	155941917	155941917	G	C	Gdf5	c.1114C>G	p.Arg372Gly	missense_variant	MODERATE	50	0	0.021	50	13	0.224	4.00082
Aplan_7298_NR_1000nM_C1_vs_Aplan_7298_NR_Parent	chr2	155994918	155994918	C	G	Cep250	c.6806C>G	p.Ala2269Gly	missense_variant	MODERATE	47	0	0.022	44	11	0.22	3.79034
Aplan_7298_NR_1000nM_C1_vs_Aplan_7298_NR_Parent	chr2	156048488	156048488	G	C	Fer1l4	c.625C>G	p.Arg209Gly	missense_variant&splice_region_variant	MODERATE	60	0	0.018	52	17	0.335	6.38894
Aplan_7298_NR_1000nM_C1_vs_Aplan_7298_NR_Parent	chr2	157914891	157914891	C	G	Vstm2l	c.81C>G	p.Pro27Pro	synonymous_variant	LOW	13	0	0.075	19	5	0.277	1.19291
Aplan_7298_NR_1000nM_C1_vs_Aplan_7298_NR_Parent	chr2	158611505	158611505	C	G	Slc32a1	c.264C>G	p.Gly88Gly	synonymous_variant	LOW	44	0	0.024	37	12	0.305	4.58181
Aplan_7298_NR_1000nM_C1_vs_Aplan_7298_NR_Parent	chr2	164025529	164025529	G	C	Pabpc1l	c.49G>C	p.Asp17His	missense_variant	MODERATE	58	0	0.018	45	9	0.244	3.45211
Aplan_7298_NR_1000nM_C1_vs_Aplan_7298_NR_Parent	chr2	164777727	164777727	G	C	Tnnc2	c.314+4C>G		splice_region_variant&intron_variant	LOW	281	2	0.008126	285	76	0.268	5.87756
Aplan_7298_NR_1000nM_C1_vs_Aplan_7298_NR_Parent	chr2	164886509	164886509	C	G	Pcif1	c.685C>G	p.Arg229Gly	missense_variant	MODERATE	66	0	0.017	61	13	0.223	4.46191
Aplan_7298_NR_1000nM_C1_vs_Aplan_7298_NR_Parent	chr2	164892173	164892173	C	G	Zfp335	c.4005G>C	p.Ser1335Ser	synonymous_variant	LOW	40	0	0.026	30	5	0.2	1.92906
Aplan_7298_NR_1000nM_C1_vs_Aplan_7298_NR_Parent	chr2	164949732	164949732	G	C	Mmp9	c.544G>C	p.Asp182His	missense_variant	MODERATE	68	0	0.015	53	17	0.335	6.83499
Aplan_7298_NR_1000nM_C1_vs_Aplan_7298_NR_Parent	chr2	165063033	165063033	C	G	Cd40	c.268C>G	p.Arg90Gly	missense_variant	MODERATE	38	0	0.026	48	17	0.362	4.87233
Aplan_7298_NR_1000nM_C1_vs_Aplan_7298_NR_Parent	chr2	165180931	165180931	C	G	Cdh22	c.219G>C	p.Thr73Thr	synonymous_variant	LOW	39	0	0.027	59	16	0.274	3.83986
Aplan_7298_NR_1000nM_C1_vs_Aplan_7298_NR_Parent	chr2	165514808	165514808	G	C	Slc2a10	c.387G>C	p.Pro129Pro	synonymous_variant	LOW	121	0	0.009376	116	27	0.236	6.24315
Aplan_7298_NR_1000nM_C1_vs_Aplan_7298_NR_Parent	chr2	166051648	166051648	C	T	Ncoa3	c.756C>T	p.Arg252Arg	synonymous_variant	LOW	100	0	0.011	137	32	0.244	6.49214
Aplan_7298_NR_1000nM_C1_vs_Aplan_7298_NR_Parent	chr2	166894625	166894625	C	G	Arfgef2	c.5216C>G	p.Ala1739Gly	missense_variant	MODERATE	57	0	0.02	52	16	0.32	5.76016
Aplan_7298_NR_1000nM_C1_vs_Aplan_7298_NR_Parent	chr2	169885719	169885719	C	G	Tshz2	c.2234C>G	p.Ala745Gly	missense_variant	MODERATE	73	0	0.014	67	15	0.222	5.19903
Aplan_7298_NR_1000nM_C1_vs_Aplan_7298_NR_Parent	chr2	173015328	173015328	C	G	Rae1	c.1066C>G	p.Arg356Gly	missense_variant	MODERATE	60	0	0.019	49	11	0.235	4.11957
Aplan_7298_NR_1000nM_C1_vs_Aplan_7298_NR_Parent	chr2	173571066	173571066	C	G	Ankrd60	c.628G>C	p.Val210Leu	missense_variant	MODERATE	65	0	0.018	66	16	0.225	4.96411
Aplan_7298_NR_1000nM_C1_vs_Aplan_7298_NR_Parent	chr2	174120297	174120297	C	G	Npepl1	c.971C>G	p.Pro324Arg	missense_variant	MODERATE	139	0	0.008384	99	24	0.258	6.96384
Aplan_7298_NR_1000nM_C1_vs_Aplan_7298_NR_Parent	chr2	178269477	178269477	C	G	Phactr3	c.519C>G	p.Ser173Ser	synonymous_variant	LOW	26	0	0.04	35	12	0.338	3.19397
Aplan_7298_NR_1000nM_C1_vs_Aplan_7298_NR_Parent	chr2	181649040	181649040	C	G	Prpf6	c.1923C>G	p.Ser641Arg	missense_variant	MODERATE	28	0	0.035	23	10	0.409	4.048
Aplan_7298_NR_1000nM_C1_vs_Aplan_7298_NR_Parent	chr2	181649101	181649101	C	G	Prpf6	c.1984C>G	p.Arg662Gly	missense_variant	MODERATE	34	0	0.034	28	10	0.362	3.91345
Aplan_7298_NR_1000nM_C1_vs_Aplan_7298_NR_Parent	chr2	181650172	181650172	C	G	Prpf6	c.2281C>G	p.Arg761Gly	missense_variant	MODERATE	66	0	0.017	125	33	0.286	5.95755
Aplan_7298_NR_1000nM_C1_vs_Aplan_7298_NR_Parent	chr3	6620054	6620054	G	C	1700008P02Rik	c.339C>G	p.Ser113Ser	synonymous_variant	LOW	56	0	0.02	75	16	0.209	4.14951
Aplan_7298_NR_1000nM_C1_vs_Aplan_7298_NR_Parent	chr3	20315710	20315710	G	A	Agtr1b	c.731C>T	p.Ala244Val	missense_variant	MODERATE	117	0	0.008882	123	29	0.251	6.31233
Aplan_7298_NR_1000nM_C1_vs_Aplan_7298_NR_Parent	chr3	28793732	28793732	C	G	Eif5a2	c.318C>G	p.Gly106Gly	synonymous_variant	LOW	43	0	0.025	51	12	0.239	3.43823
Aplan_7298_NR_1000nM_C1_vs_Aplan_7298_NR_Parent	chr3	30765363	30765363	G	C	Samd7	c.1260G>C	p.Trp420Cys	missense_variant	MODERATE	52	1	0.023	60	17	0.25	3.84248
Aplan_7298_NR_1000nM_C1_vs_Aplan_7298_NR_Parent	chr3	36164338	36164338	C	G	D3Ertd254e	c.509C>G	p.Pro170Arg	missense_variant	MODERATE	51	0	0.019	70	16	0.235	4.12053
Aplan_7298_NR_1000nM_C1_vs_Aplan_7298_NR_Parent	chr3	38888006	38888006	C	G	Fat4	c.1047C>G	p.Asn349Lys	missense_variant	MODERATE	50	0	0.02	68	16	0.259	4.15559
Aplan_7298_NR_1000nM_C1_vs_Aplan_7298_NR_Parent	chr3	38888623	38888623	G	C	Fat4	c.1664G>C	p.Arg555Pro	missense_variant	MODERATE	80	0	0.013	105	29	0.273	6.20314
Aplan_7298_NR_1000nM_C1_vs_Aplan_7298_NR_Parent	chr3	54749330	54749330	C	G	Alg5	c.961C>G	p.Arg321Gly	missense_variant	MODERATE	55	0	0.021	45	8	0.232	2.93616
Aplan_7298_NR_1000nM_C1_vs_Aplan_7298_NR_Parent	chr3	55696403	55696403	G	A	Nbea	c.7025C>T	p.Pro2342Leu	missense_variant	MODERATE	54	0	0.022	69	14	0.206	3.61472
Aplan_7298_NR_1000nM_C1_vs_Aplan_7298_NR_Parent	chr3	55783888	55783888	C	G	Mab21l1	c.895C>G	p.Arg299Gly	missense_variant	MODERATE	61	0	0.018	68	22	0.316	6.46001
Aplan_7298_NR_1000nM_C1_vs_Aplan_7298_NR_Parent	chr3	60024979	60024979	C	G	Aadacl2	c.914C>G	p.Ser305Trp	missense_variant	MODERATE	140	0	0.008355	138	32	0.233	6.16081
Aplan_7298_NR_1000nM_C1_vs_Aplan_7298_NR_Parent	chr3	62530761	62530761	C	G	Gpr149	c.1974G>C	p.Lys658Asn	missense_variant	MODERATE	102	0	0.01	126	33	0.273	6.20128
Aplan_7298_NR_1000nM_C1_vs_Aplan_7298_NR_Parent	chr3	79066574	79066574	G	C	Rapgef2	c.4458C>G	p.Asp1486Glu	missense_variant&splice_region_variant	MODERATE	39	1	0.055	26	7	0.28	2.26823
Aplan_7298_NR_1000nM_C1_vs_Aplan_7298_NR_Parent	chr3	79821284	79821284	C	G	Tmem144	c.883G>C	p.Val295Leu	missense_variant	MODERATE	56	0	0.021	48	14	0.312	5.21712
Aplan_7298_NR_1000nM_C1_vs_Aplan_7298_NR_Parent	chr3	87741846	87741846	G	C	Lrrc71	c.1014C>G	p.Tyr338*	stop_gained	HIGH	159	0	0.007123	156	40	0.248	6.01906
Aplan_7298_NR_1000nM_C1_vs_Aplan_7298_NR_Parent	chr3	87810783	87810783	G	C	Insrr	c.2710G>C	p.Gly904Arg	missense_variant	MODERATE	96	0	0.012	107	31	0.313	6.0105
Aplan_7298_NR_1000nM_C1_vs_Aplan_7298_NR_Parent	chr3	87810811	87810811	G	C	Insrr	c.2737+1G>C		splice_donor_variant&intron_variant	HIGH	115	0	0.009591	106	29	0.284	5.92363
Aplan_7298_NR_1000nM_C1_vs_Aplan_7298_NR_Parent	chr3	88074836	88074836	C	G	Ttc24	c.88G>C	p.Asp30His	missense_variant	MODERATE	165	0	0.00715	162	34	0.23	6.04209
Aplan_7298_NR_1000nM_C1_vs_Aplan_7298_NR_Parent	chr3	88245494	88245494	G	C	Rhbg	c.911C>G	p.Ala304Gly	missense_variant	MODERATE	81	0	0.014	77	18	0.244	6.11894
Aplan_7298_NR_1000nM_C1_vs_Aplan_7298_NR_Parent	chr3	88321063	88321063	C	G	Cct3	c.1451C>G	p.Thr484Ser	missense_variant	MODERATE	70	0	0.016	42	12	0.307	5.60144
Aplan_7298_NR_1000nM_C1_vs_Aplan_7298_NR_Parent	chr3	88420575	88420575	C	T	Slc25a44	c.608G>A	p.Arg203Gln	missense_variant	MODERATE	99	0	0.012	113	31	0.268	6.05892
Aplan_7298_NR_1000nM_C1_vs_Aplan_7298_NR_Parent	chr3	88420834	88420834	G	C	Slc25a44	c.349C>G	p.Arg117Gly	missense_variant	MODERATE	88	0	0.012	92	22	0.255	5.96786
Aplan_7298_NR_1000nM_C1_vs_Aplan_7298_NR_Parent	chr3	88635610	88635610	C	G	Arhgef2	c.1114C>G	p.Arg372Gly	missense_variant	MODERATE	68	0	0.015	61	21	0.336	6.07115
Aplan_7298_NR_1000nM_C1_vs_Aplan_7298_NR_Parent	chr3	88717633	88717633	C	G	Rit1	c.138C>G	p.Phe46Leu	missense_variant	MODERATE	146	0	0.007636	172	41	0.237	6.4315
Aplan_7298_NR_1000nM_C1_vs_Aplan_7298_NR_Parent	chr3	89184448	89184448	C	G	Fam189b	c.318C>G	p.Val106Val	synonymous_variant	LOW	130	0	0.008844	131	27	0.201	5.71824
Aplan_7298_NR_1000nM_C1_vs_Aplan_7298_NR_Parent	chr3	89231977	89231977	G	C	Muc1	c.1683G>C	p.Gln561His	missense_variant	MODERATE	94	0	0.013	111	34	0.291	6.05878
Aplan_7298_NR_1000nM_C1_vs_Aplan_7298_NR_Parent	chr3	89239481	89239481	C	G	Trim46	c.953G>C	p.Arg318Pro	missense_variant	MODERATE	54	0	0.02	61	13	0.213	3.80389
Aplan_7298_NR_1000nM_C1_vs_Aplan_7298_NR_Parent	chr3	89276238	89276238	G	C	Efna1	c.280C>G	p.Arg94Gly	missense_variant	MODERATE	36	0	0.033	27	9	0.346	3.70328
Aplan_7298_NR_1000nM_C1_vs_Aplan_7298_NR_Parent	chr3	89316571	89316571	G	C	Efna3	c.310C>G	p.Arg104Gly	missense_variant	MODERATE	28	0	0.041	25	7	0.307	2.50605
Aplan_7298_NR_1000nM_C1_vs_Aplan_7298_NR_Parent	chr3	89912974	89912974	G	C	Il6ra	c.66C>G	p.Leu22Leu	synonymous_variant	LOW	21	0	0.056	26	6	0.262	1.57683
Aplan_7298_NR_1000nM_C1_vs_Aplan_7298_NR_Parent	chr3	90389208	90389208	G	A	Slc27a3	c.583C>T	p.Arg195Cys	missense_variant	MODERATE	13	0	0.075	10	6	0.584	2.68187
Aplan_7298_NR_1000nM_C1_vs_Aplan_7298_NR_Parent	chr3	94346558	94346558	G	C	Them5	c.586G>C	p.Val196Leu	missense_variant	MODERATE	33	0	0.029	42	11	0.281	2.76775
Aplan_7298_NR_1000nM_C1_vs_Aplan_7298_NR_Parent	chr3	94436419	94436419	G	C	Oaz3	c.136C>G	p.Gly46Gly	synonymous_variant	LOW	44	0	0.025	67	14	0.222	3.15217
Aplan_7298_NR_1000nM_C1_vs_Aplan_7298_NR_Parent	chr3	95140471	95140471	G	C	Tnfaip8l2	c.80C>G	p.Ala27Gly	missense_variant	MODERATE	108	0	0.01	132	29	0.226	6.48452
Aplan_7298_NR_1000nM_C1_vs_Aplan_7298_NR_Parent	chr3	95203808	95203808	C	G	Gabpb2	c.394G>C	p.Ala132Pro	missense_variant	MODERATE	99	0	0.012	83	21	0.26	5.84339
Aplan_7298_NR_1000nM_C1_vs_Aplan_7298_NR_Parent	chr3	95240848	95240848	C	G	Gm128	c.134G>C	p.Gly45Ala	missense_variant	MODERATE	90	0	0.013	65	12	0.203	4.8089
Aplan_7298_NR_1000nM_C1_vs_Aplan_7298_NR_Parent	chr3	95258189	95258189	G	C	Prune	c.775-4C>G		splice_region_variant&intron_variant	LOW	33	0	0.034	23	5	0.26	2.05507
Aplan_7298_NR_1000nM_C1_vs_Aplan_7298_NR_Parent	chr3	95302754	95302754	G	C	Anxa9	c.293C>G	p.Ala98Gly	missense_variant	MODERATE	65	0	0.017	48	16	0.319	6.69166
Aplan_7298_NR_1000nM_C1_vs_Aplan_7298_NR_Parent	chr3	95901264	95901264	C	G	Car14	c.85G>C	p.Gly29Arg	missense_variant	MODERATE	44	1	0.03	32	9	0.277	2.86629
Aplan_7298_NR_1000nM_C1_vs_Aplan_7298_NR_Parent	chr3	101431577	101431577	C	T	Igsf3	c.1206C>T	p.Ile402Ile	synonymous_variant	LOW	54	0	0.019	68	17	0.255	4.63302
Aplan_7298_NR_1000nM_C1_vs_Aplan_7298_NR_Parent	chr3	104785814	104785814	G	C	Ppm1j	c.1486G>C	p.Val496Leu	missense_variant	MODERATE	77	0	0.014	78	18	0.25	5.59855
Aplan_7298_NR_1000nM_C1_vs_Aplan_7298_NR_Parent	chr3	105005656	105005656	G	C	Cttnbp2nl	c.911C>G	p.Pro304Arg	missense_variant	MODERATE	105	0	0.009822	112	32	0.285	5.85072
Aplan_7298_NR_1000nM_C1_vs_Aplan_7298_NR_Parent	chr3	107195326	107195326	C	G	Kcna10	c.1272C>G	p.Tyr424*	stop_gained	HIGH	77	0	0.014	76	20	0.276	6.33523
Aplan_7298_NR_1000nM_C1_vs_Aplan_7298_NR_Parent	chr3	108805260	108805260	G	C	Stxbp3	c.883C>G	p.Arg295Gly	missense_variant	MODERATE	117	0	0.01	140	36	0.257	6.02231
Aplan_7298_NR_1000nM_C1_vs_Aplan_7298_NR_Parent	chr3	115712319	115712319	C	G	S1pr1	c.625G>C	p.Val209Leu	missense_variant	MODERATE	25	0	0.036	48	9	0.214	1.63048
Aplan_7298_NR_1000nM_C1_vs_Aplan_7298_NR_Parent	chr3	116662403	116662403	C	G	Mfsd14a	c.76G>C	p.Gly26Arg	missense_variant	MODERATE	49	0	0.022	43	7	0.21	2.43435
Aplan_7298_NR_1000nM_C1_vs_Aplan_7298_NR_Parent	chr3	116768868	116768868	C	G	Agl	c.3280G>C	p.Gly1094Arg	missense_variant	MODERATE	51	0	0.023	32	8	0.258	3.57403
Aplan_7298_NR_1000nM_C1_vs_Aplan_7298_NR_Parent	chr3	122512936	122512936	C	G	Bcar3	c.1604C>G	p.Ala535Gly	missense_variant	MODERATE	73	0	0.014	69	15	0.224	5.08168
Aplan_7298_NR_1000nM_C1_vs_Aplan_7298_NR_Parent	chr3	123464807	123464807	C	G	Prss12	c.549C>G	p.His183Gln	missense_variant	MODERATE	55	0	0.022	65	14	0.229	4.01047
Aplan_7298_NR_1000nM_C1_vs_Aplan_7298_NR_Parent	chr3	135603736	135603736	G	C	Nfkb1	c.1596C>G	p.Thr532Thr	synonymous_variant	LOW	74	0	0.016	63	16	0.254	5.90734
Aplan_7298_NR_1000nM_C1_vs_Aplan_7298_NR_Parent	chr3	138325178	138325178	C	G	Adh6a	c.427C>G	p.Arg143Gly	missense_variant	MODERATE	35	0	0.029	35	10	0.304	3.03361
Aplan_7298_NR_1000nM_C1_vs_Aplan_7298_NR_Parent	chr3	142504462	142504462	C	G	Gbp5	c.839C>G	p.Thr280Ser	missense_variant	MODERATE	59	0	0.02	80	15	0.2	3.7999
Aplan_7298_NR_1000nM_C1_vs_Aplan_7298_NR_Parent	chr3	145016665	145016665	G	C	Clca1	c.945C>G	p.Ser315Ser	synonymous_variant	LOW	54	0	0.022	64	20	0.292	5.80919
Aplan_7298_NR_1000nM_C1_vs_Aplan_7298_NR_Parent	chr3	151745535	151745536	CA	GG	Ifi44	c.777_778delTGinsCC	p.Asp260His	missense_variant	MODERATE	53	0	0.022	41	18	0.447	6.03889
Aplan_7298_NR_1000nM_C1_vs_Aplan_7298_NR_Parent	chr3	153910798	153910798	G	A	Rabggtb	c.226C>T	p.Arg76*	stop_gained	HIGH	90	0	0.011	125	33	0.261	6.28381
Aplan_7298_NR_1000nM_C1_vs_Aplan_7298_NR_Parent	chr4	9610898	9610898	C	T	Asph	c.390G>A	p.Pro130Pro	synonymous_variant	LOW	101	0	0.012	130	36	0.277	5.72192
Aplan_7298_NR_1000nM_C1_vs_Aplan_7298_NR_Parent	chr4	10991316	10991316	C	G	Plekhf2	c.25G>C	p.Glu9Gln	missense_variant	MODERATE	88	0	0.013	107	28	0.253	6.31879
Aplan_7298_NR_1000nM_C1_vs_Aplan_7298_NR_Parent	chr4	14769639	14769639	C	G	Lrrc69	c.511G>C	p.Glu171Gln	missense_variant	MODERATE	67	0	0.018	70	20	0.254	6.37306
Aplan_7298_NR_1000nM_C1_vs_Aplan_7298_NR_Parent	chr4	16006389	16006389	C	G	Osgin2	c.304G>C	p.Glu102Gln	missense_variant	MODERATE	65	0	0.017	111	30	0.29	6.47314
Aplan_7298_NR_1000nM_C1_vs_Aplan_7298_NR_Parent	chr4	32760718	32760718	C	G	Mdn1	c.14767C>G	p.Pro4923Ala	missense_variant	MODERATE	18	0	0.059	17	6	0.333	2.11778
Aplan_7298_NR_1000nM_C1_vs_Aplan_7298_NR_Parent	chr4	32774069	32774069	C	G	Mdn1	c.16679C>G	p.Ala5560Gly	missense_variant	MODERATE	39	0	0.029	39	11	0.294	3.36559
Aplan_7298_NR_1000nM_C1_vs_Aplan_7298_NR_Parent	chr4	33085726	33085726	G	C	Gabrr2	c.1145G>C	p.Arg382Pro	missense_variant	MODERATE	39	0	0.027	28	10	0.344	4.27641
Aplan_7298_NR_1000nM_C1_vs_Aplan_7298_NR_Parent	chr4	43007038	43007038	C	G	Fancg	c.738G>C	p.Pro246Pro	synonymous_variant	LOW	107	0	0.011	84	23	0.29	5.92181
Aplan_7298_NR_1000nM_C1_vs_Aplan_7298_NR_Parent	chr4	43009154	43009154	C	G	Fancg	c.316G>C	p.Glu106Gln	missense_variant	MODERATE	38	0	0.027	43	13	0.326	3.95131
Aplan_7298_NR_1000nM_C1_vs_Aplan_7298_NR_Parent	chr4	43033624	43033624	G	C	Fam214b	c.1528C>G	p.Arg510Gly	missense_variant	MODERATE	49	0	0.022	74	16	0.219	3.73714
Aplan_7298_NR_1000nM_C1_vs_Aplan_7298_NR_Parent	chr4	43421791	43421791	C	G	Rusc2	c.2210C>G	p.Pro737Arg	missense_variant	MODERATE	48	0	0.024	51	10	0.208	2.90658
Aplan_7298_NR_1000nM_C1_vs_Aplan_7298_NR_Parent	chr4	43553500	43553500	G	C	Tln1	c.894C>G	p.Tyr298*	stop_gained	HIGH	75	0	0.015	66	18	0.29	6.55192
Aplan_7298_NR_1000nM_C1_vs_Aplan_7298_NR_Parent	chr4	43580562	43580562	C	G	Rgp1	c.423C>G	p.Gly141Gly	synonymous_variant	LOW	69	0	0.016	78	19	0.247	5.71027
Aplan_7298_NR_1000nM_C1_vs_Aplan_7298_NR_Parent	chr4	43821234	43821234	G	C	Olfr156	c.126C>G	p.Asn42Lys	missense_variant	MODERATE	131	0	0.008571	126	33	0.255	5.97388
Aplan_7298_NR_1000nM_C1_vs_Aplan_7298_NR_Parent	chr4	43984465	43984465	G	C	Ccin	c.871G>C	p.Gly291Arg	missense_variant	MODERATE	52	0	0.022	42	8	0.209	2.97456
Aplan_7298_NR_1000nM_C1_vs_Aplan_7298_NR_Parent	chr4	44167320	44167320	C	G	Rnf38	c.7G>C	p.Glu3Gln	missense_variant&splice_region_variant	MODERATE	75	0	0.017	54	18	0.308	6.08385
Aplan_7298_NR_1000nM_C1_vs_Aplan_7298_NR_Parent	chr4	45826438	45826438	G	C	Igfbpl1	c.356C>G	p.Ala119Gly	missense_variant	MODERATE	47	0	0.022	51	15	0.304	4.66624
Aplan_7298_NR_1000nM_C1_vs_Aplan_7298_NR_Parent	chr4	49447468	49447468	G	C	Acnat1	c.1112C>G	p.Ala371Gly	missense_variant	MODERATE	91	0	0.012	83	22	0.277	6.16155
Aplan_7298_NR_1000nM_C1_vs_Aplan_7298_NR_Parent	chr4	59365752	59365752	C	G	Susd1	c.1459G>C	p.Ala487Pro	missense_variant	MODERATE	62	0	0.02	77	22	0.263	5.74725
Aplan_7298_NR_1000nM_C1_vs_Aplan_7298_NR_Parent	chr4	59774014	59774014	G	C	Inip	c.129-8C>G		splice_region_variant&intron_variant	LOW	46	0	0.024	41	12	0.281	4.35132
Aplan_7298_NR_1000nM_C1_vs_Aplan_7298_NR_Parent	chr4	72158292	72158292	C	G	Tle1	c.498G>C	p.Ala166Ala	synonymous_variant	LOW	42	0	0.027	43	11	0.283	3.32768
Aplan_7298_NR_1000nM_C1_vs_Aplan_7298_NR_Parent	chr4	72852227	72852227	G	T	Aldoart1	c.343C>A	p.Arg115Ser	missense_variant	MODERATE	126	0	0.008725	133	42	0.305	6.00321
Aplan_7298_NR_1000nM_C1_vs_Aplan_7298_NR_Parent	chr4	80846586	80846586	C	G	Tyrp1	c.1097C>G	p.Thr366Arg	missense_variant	MODERATE	44	0	0.024	40	9	0.25	3.12915
Aplan_7298_NR_1000nM_C1_vs_Aplan_7298_NR_Parent	chr4	86342980	86342980	C	G	Adamtsl1	c.3451C>G	p.Arg1151Gly	missense_variant	MODERATE	34	0	0.033	48	9	0.222	2.0518
Aplan_7298_NR_1000nM_C1_vs_Aplan_7298_NR_Parent	chr4	86664436	86664436	G	C	Plin2	c.302C>G	p.Thr101Arg	missense_variant	MODERATE	95	0	0.012	96	20	0.214	6.19894
Aplan_7298_NR_1000nM_C1_vs_Aplan_7298_NR_Parent	chr4	89688543	89688543	G	C	Dmrta1	c.235G>C	p.Gly79Arg	missense_variant	MODERATE	32	0	0.032	30	6	0.225	2.01507
Aplan_7298_NR_1000nM_C1_vs_Aplan_7298_NR_Parent	chr4	98733459	98733459	G	C	L1td1	c.257G>C	p.Arg86Pro	missense_variant	MODERATE	49	0	0.022	51	14	0.289	4.35128
Aplan_7298_NR_1000nM_C1_vs_Aplan_7298_NR_Parent	chr4	99657288	99657288	C	T	Foxd3	c.664C>T	p.Arg222Trp	missense_variant	MODERATE	38	0	0.027	42	8	0.2	2.23967
Aplan_7298_NR_1000nM_C1_vs_Aplan_7298_NR_Parent	chr4	107214873	107214873	C	G	Ldlrad1	c.291C>G	p.His97Gln	missense_variant	MODERATE	98	0	0.012	65	15	0.259	6.46111
Aplan_7298_NR_1000nM_C1_vs_Aplan_7298_NR_Parent	chr4	108210087	108210087	G	C	Zyg11a	c.219C>G	p.Ala73Ala	synonymous_variant	LOW	41	0	0.028	36	9	0.25	3.23391
Aplan_7298_NR_1000nM_C1_vs_Aplan_7298_NR_Parent	chr4	116286198	116286198	G	C	Pik3r3	c.764G>C	p.Arg255Pro	missense_variant&splice_region_variant	MODERATE	76	0	0.016	75	20	0.264	6.34459
Aplan_7298_NR_1000nM_C1_vs_Aplan_7298_NR_Parent	chr4	116820986	116820986	G	C	Hpdl	c.277C>G	p.Arg93Gly	missense_variant	MODERATE	58	0	0.019	49	12	0.256	4.42921
Aplan_7298_NR_1000nM_C1_vs_Aplan_7298_NR_Parent	chr4	117129998	117129998	G	C	Plk3	c.1603C>G	p.Arg535Gly	missense_variant	MODERATE	50	0	0.022	29	10	0.364	4.85689
Aplan_7298_NR_1000nM_C1_vs_Aplan_7298_NR_Parent	chr4	117172335	117172335	G	C	Kif2c	c.601C>G	p.Arg201Gly	missense_variant	MODERATE	259	0	0.004573	268	55	0.219	5.88991
Aplan_7298_NR_1000nM_C1_vs_Aplan_7298_NR_Parent	chr4	117940368	117940368	G	C	St3gal3	c.874C>G	p.Leu292Val	missense_variant	MODERATE	67	0	0.019	54	18	0.295	7.11963
Aplan_7298_NR_1000nM_C1_vs_Aplan_7298_NR_Parent	chr4	119233311	119233311	C	G	P3h1	c.355C>G	p.Arg119Gly	missense_variant	MODERATE	37	0	0.03	34	7	0.237	2.39306
Aplan_7298_NR_1000nM_C1_vs_Aplan_7298_NR_Parent	chr4	120548056	120548056	C	G	Ctps	c.1188G>C	p.Leu396Phe	missense_variant&splice_region_variant	MODERATE	73	0	0.016	84	20	0.237	5.59324
Aplan_7298_NR_1000nM_C1_vs_Aplan_7298_NR_Parent	chr4	123117207	123117207	G	C	Oxct2b	c.919G>C	p.Ala307Pro	missense_variant	MODERATE	45	0	0.021	47	12	0.266	3.65115
Aplan_7298_NR_1000nM_C1_vs_Aplan_7298_NR_Parent	chr4	123117504	123117504	G	C	Oxct2b	c.1216G>C	p.Gly406Arg	missense_variant	MODERATE	105	0	0.01	124	44	0.354	5.92621
Aplan_7298_NR_1000nM_C1_vs_Aplan_7298_NR_Parent	chr4	123372356	123372356	G	C	Macf1	c.20448C>G	p.Phe6816Leu	missense_variant	MODERATE	45	0	0.024	31	10	0.3	4.33287
Aplan_7298_NR_1000nM_C1_vs_Aplan_7298_NR_Parent	chr4	123471925	123471925	G	C	Macf1	c.9042C>G	p.Ile3014Met	missense_variant	MODERATE	197	0	0.005399	249	61	0.244	5.85096
Aplan_7298_NR_1000nM_C1_vs_Aplan_7298_NR_Parent	chr4	125059117	125059117	C	G	Dnali1	c.612G>C	p.Glu204Asp	missense_variant	MODERATE	101	0	0.011	174	41	0.233	6.11283
Aplan_7298_NR_1000nM_C1_vs_Aplan_7298_NR_Parent	chr4	125686151	125686151	C	T	Grik3	c.1688C>T	p.Pro563Leu	missense_variant	MODERATE	149	0	0.007537	125	33	0.246	5.94063
Aplan_7298_NR_1000nM_C1_vs_Aplan_7298_NR_Parent	chr4	126322946	126322946	G	C	Tekt2	c.873C>G	p.Ala291Ala	synonymous_variant	LOW	128	0	0.008224	143	32	0.219	6.12105
Aplan_7298_NR_1000nM_C1_vs_Aplan_7298_NR_Parent	chr4	126461769	126461769	C	G	Ago1	c.246G>C	p.Pro82Pro	synonymous_variant	LOW	70	0	0.017	50	13	0.277	5.39238
Aplan_7298_NR_1000nM_C1_vs_Aplan_7298_NR_Parent	chr4	128449114	128449114	C	G	Csmd2	c.4298C>G	p.Pro1433Arg	missense_variant	MODERATE	43	0	0.026	42	11	0.263	3.6976
Aplan_7298_NR_1000nM_C1_vs_Aplan_7298_NR_Parent	chr4	128617023	128617023	G	C	Tlr12	c.1433C>G	p.Thr478Arg	missense_variant	MODERATE	43	0	0.024	69	16	0.23	3.37379
Aplan_7298_NR_1000nM_C1_vs_Aplan_7298_NR_Parent	chr4	129639344	129639344	G	C	Txlna	c.390C>G	p.Asn130Lys	missense_variant	MODERATE	254	0	0.004655	238	56	0.237	5.8271
Aplan_7298_NR_1000nM_C1_vs_Aplan_7298_NR_Parent	chr4	132499957	132499957	G	C	Sesn2	c.163C>G	p.Arg55Gly	missense_variant	MODERATE	39	0	0.029	22	5	0.25	2.35394
Aplan_7298_NR_1000nM_C1_vs_Aplan_7298_NR_Parent	chr4	133370617	133370617	C	G	Slc9a1	c.74C>G	p.Ala25Gly	missense_variant	MODERATE	74	0	0.016	80	16	0.202	4.80191
Aplan_7298_NR_1000nM_C1_vs_Aplan_7298_NR_Parent	chr4	133486468	133486468	G	C	Fam46b	c.649G>C	p.Asp217His	missense_variant	MODERATE	97	0	0.011	86	25	0.27	5.89153
Aplan_7298_NR_1000nM_C1_vs_Aplan_7298_NR_Parent	chr4	133601328	133601328	G	C	Sfn	c.442C>G	p.Arg148Gly	missense_variant	MODERATE	77	0	0.014	66	17	0.278	6.25904
Aplan_7298_NR_1000nM_C1_vs_Aplan_7298_NR_Parent	chr4	134018734	134018734	G	C	Lin28a	c.8C>G	p.Ser3Trp	missense_variant	MODERATE	25	0	0.041	32	9	0.214	2.47562
Aplan_7298_NR_1000nM_C1_vs_Aplan_7298_NR_Parent	chr4	134072620	134072620	G	C	Aim1l	c.163G>C	p.Glu55Gln	missense_variant	MODERATE	66	0	0.016	55	16	0.296	6.0801
Aplan_7298_NR_1000nM_C1_vs_Aplan_7298_NR_Parent	chr4	134075547	134075547	G	C	Aim1l	c.2633G>C	p.Arg878Pro	missense_variant	MODERATE	80	0	0.014	79	21	0.256	6.67674
Aplan_7298_NR_1000nM_C1_vs_Aplan_7298_NR_Parent	chr4	134229412	134229412	G	C	Cnksr1	c.1536C>G	p.Pro512Pro	synonymous_variant	LOW	113	1	0.017	81	15	0.209	5.02863
Aplan_7298_NR_1000nM_C1_vs_Aplan_7298_NR_Parent	chr4	134251956	134251956	G	C	Grrp1	c.210C>G	p.Ala70Ala	synonymous_variant	LOW	69	0	0.017	39	10	0.263	4.78468
Aplan_7298_NR_1000nM_C1_vs_Aplan_7298_NR_Parent	chr4	136186862	136186862	G	C	E2f2	c.922G>C	p.Glu308Gln	missense_variant	MODERATE	17	0	0.054	18	5	0.318	1.34242
Aplan_7298_NR_1000nM_C1_vs_Aplan_7298_NR_Parent	chr4	136880488	136880488	C	G	C1qb	c.563G>C	p.Arg188Pro	missense_variant	MODERATE	43	0	0.023	44	10	0.256	2.95883
Aplan_7298_NR_1000nM_C1_vs_Aplan_7298_NR_Parent	chr4	139238905	139238905	G	C	Capzb	c.91-4G>C		splice_region_variant&intron_variant	LOW	26	0	0.048	20	6	0.304	2.38321
Aplan_7298_NR_1000nM_C1_vs_Aplan_7298_NR_Parent	chr4	140819839	140819839	C	G	Padi1	c.1343G>C	p.Arg448Pro	missense_variant	MODERATE	33	0	0.033	28	10	0.408	3.83706
Aplan_7298_NR_1000nM_C1_vs_Aplan_7298_NR_Parent	chr4	140917614	140917614	C	G	Padi2	c.158C>G	p.Ser53Trp	missense_variant	MODERATE	42	0	0.024	36	9	0.276	3.28715
Aplan_7298_NR_1000nM_C1_vs_Aplan_7298_NR_Parent	chr4	141770926	141770926	G	C	Dnajc16	c.1129C>G	p.Arg377Gly	missense_variant	MODERATE	41	0	0.026	39	9	0.226	3.03914
Aplan_7298_NR_1000nM_C1_vs_Aplan_7298_NR_Parent	chr4	142117127	142117127	C	G	Kazn	c.1277G>C	p.Arg426Pro	missense_variant	MODERATE	83	0	0.014	41	12	0.29	6.30452
Aplan_7298_NR_1000nM_C1_vs_Aplan_7298_NR_Parent	chr4	143350260	143350260	C	G	Lrrc38	c.92C>G	p.Ala31Gly	missense_variant	MODERATE	59	0	0.019	32	10	0.343	4.99836
Aplan_7298_NR_1000nM_C1_vs_Aplan_7298_NR_Parent	chr4	149150847	149150847	G	C	Pgd	c.1332+6C>G		splice_region_variant&intron_variant	LOW	48	0	0.022	49	12	0.255	3.64367
Aplan_7298_NR_1000nM_C1_vs_Aplan_7298_NR_Parent	chr4	149454882	149454882	G	C	Rbp7	c.69C>G	p.Ala23Ala	synonymous_variant	LOW	159	0	0.007939	118	27	0.22	6.47626
Aplan_7298_NR_1000nM_C1_vs_Aplan_7298_NR_Parent	chr4	150168297	150168297	G	C	Slc2a7	c.1393G>C	p.Ala465Pro	missense_variant	MODERATE	50	0	0.022	40	8	0.228	3.00344
Aplan_7298_NR_1000nM_C1_vs_Aplan_7298_NR_Parent	chr4	152015394	152015394	C	G	Klhl21	c.1560C>G	p.Tyr520*	stop_gained	HIGH	61	0	0.019	83	22	0.248	5.738
Aplan_7298_NR_1000nM_C1_vs_Aplan_7298_NR_Parent	chr4	152159698	152159698	G	C	Hes2	c.30G>C	p.Ala10Ala	synonymous_variant	LOW	72	0	0.017	64	17	0.25	6.12641
Aplan_7298_NR_1000nM_C1_vs_Aplan_7298_NR_Parent	chr4	152394955	152394955	G	C	Kcnab2	c.778C>G	p.Pro260Ala	missense_variant	MODERATE	65	0	0.019	52	11	0.217	4.15727
Aplan_7298_NR_1000nM_C1_vs_Aplan_7298_NR_Parent	chr4	154081549	154081549	C	G	Trp73	c.206G>C	p.Ser69Thr	missense_variant	MODERATE	64	0	0.019	41	13	0.328	5.89893
Aplan_7298_NR_1000nM_C1_vs_Aplan_7298_NR_Parent	chr4	154341999	154341999	C	G	Prdm16	c.1328G>C	p.Arg443Pro	missense_variant	MODERATE	62	0	0.018	48	11	0.238	4.27574
Aplan_7298_NR_1000nM_C1_vs_Aplan_7298_NR_Parent	chr4	155157976	155157976	G	C	Ski	c.1965C>G	p.Ala655Ala	synonymous_variant	LOW	37	0	0.028	40	10	0.276	2.96248
Aplan_7298_NR_1000nM_C1_vs_Aplan_7298_NR_Parent	chr4	155470117	155470117	G	C	Tmem52	c.299G>C	p.Gly100Ala	missense_variant	MODERATE	83	0	0.014	68	16	0.238	6.01823
Aplan_7298_NR_1000nM_C1_vs_Aplan_7298_NR_Parent	chr5	7305550	7305550	G	C	4921511H03Rik	c.730G>C	p.Asp244His	missense_variant	MODERATE	57	0	0.019	74	19	0.276	5.17124
Aplan_7298_NR_1000nM_C1_vs_Aplan_7298_NR_Parent	chr5	14679303	14679303	T	G	Pclo	c.8174T>G	p.Val2725Gly	missense_variant	MODERATE	67	0	0.016	95	27	0.281	6.27772
Aplan_7298_NR_1000nM_C1_vs_Aplan_7298_NR_Parent	chr5	25258882	25258882	G	C	Galnt11	c.1151G>C	p.Arg384Pro	missense_variant	MODERATE	44	0	0.025	45	9	0.238	2.60042
Aplan_7298_NR_1000nM_C1_vs_Aplan_7298_NR_Parent	chr5	30375631	30375631	C	G	Otof	c.4766G>C	p.Arg1589Pro	missense_variant	MODERATE	45	0	0.024	41	11	0.252	3.88892
Aplan_7298_NR_1000nM_C1_vs_Aplan_7298_NR_Parent	chr5	30953687	30953687	G	C	Abhd1	c.503G>C	p.Arg168Pro	missense_variant	MODERATE	85	0	0.012	86	18	0.214	5.54851
Aplan_7298_NR_1000nM_C1_vs_Aplan_7298_NR_Parent	chr5	30956305	30956305	G	C	Preb	c.956C>G	p.Thr319Arg	missense_variant	MODERATE	55	0	0.02	56	10	0.207	2.9002
Aplan_7298_NR_1000nM_C1_vs_Aplan_7298_NR_Parent	chr5	31138335	31138335	C	G	Ucn	c.186G>C	p.Ala62Ala	synonymous_variant	LOW	28	0	0.034	29	8	0.31	2.34887
Aplan_7298_NR_1000nM_C1_vs_Aplan_7298_NR_Parent	chr5	34638952	34638952	G	C	Nop14	c.2422C>G	p.Arg808Gly	missense_variant	MODERATE	71	0	0.016	82	24	0.314	6.14274
Aplan_7298_NR_1000nM_C1_vs_Aplan_7298_NR_Parent	chr5	38319854	38319854	C	G	Drd5	c.189C>G	p.Ile63Met	missense_variant	MODERATE	31	0	0.03	36	7	0.216	1.89885
Aplan_7298_NR_1000nM_C1_vs_Aplan_7298_NR_Parent	chr5	38319926	38319926	C	G	Drd5	c.261C>G	p.Phe87Leu	missense_variant	MODERATE	53	0	0.021	48	9	0.217	3.09524
Aplan_7298_NR_1000nM_C1_vs_Aplan_7298_NR_Parent	chr5	38320481	38320481	C	G	Drd5	c.816C>G	p.Cys272Trp	missense_variant	MODERATE	63	0	0.016	87	23	0.289	5.99006
Aplan_7298_NR_1000nM_C1_vs_Aplan_7298_NR_Parent	chr5	38320661	38320661	C	G	Drd5	c.996C>G	p.Ser332Arg	missense_variant	MODERATE	69	0	0.015	81	20	0.224	5.62778
Aplan_7298_NR_1000nM_C1_vs_Aplan_7298_NR_Parent	chr5	52368549	52368549	G	C	Sod3	c.589G>C	p.Gly197Arg	missense_variant	MODERATE	21	0	0.05	20	5	0.275	1.68427
Aplan_7298_NR_1000nM_C1_vs_Aplan_7298_NR_Parent	chr5	64101030	64101030	C	G	Pgm1	c.357C>G	p.Pro119Pro	synonymous_variant	LOW	40	0	0.029	34	9	0.277	3.3237
Aplan_7298_NR_1000nM_C1_vs_Aplan_7298_NR_Parent	chr5	65389592	65389592	G	A	Rpl9	c.277C>T	p.Arg93Trp	missense_variant	MODERATE	134	0	0.008554	159	38	0.242	5.95833
Aplan_7298_NR_1000nM_C1_vs_Aplan_7298_NR_Parent	chr5	66026927	66026927	C	G	Rbm47	c.332G>C	p.Arg111Pro	missense_variant	MODERATE	66	0	0.017	63	15	0.26	5.08798
Aplan_7298_NR_1000nM_C1_vs_Aplan_7298_NR_Parent	chr5	76636900	76636900	G	C	Cep135	c.2841G>C	p.Ser947Ser	synonymous_variant	LOW	28	0	0.036	28	9	0.312	2.73912
Aplan_7298_NR_1000nM_C1_vs_Aplan_7298_NR_Parent	chr5	76637069	76637069	C	G	Cep135	c.3010C>G	p.Arg1004Gly	missense_variant&splice_region_variant	MODERATE	23	0	0.044	41	11	0.25	2.28275
Aplan_7298_NR_1000nM_C1_vs_Aplan_7298_NR_Parent	chr5	76858458	76858458	G	C	C530008M17Rik	c.2665G>C	p.Val889Leu	missense_variant	MODERATE	61	0	0.017	52	11	0.24	3.98339
Aplan_7298_NR_1000nM_C1_vs_Aplan_7298_NR_Parent	chr5	92239022	92239022	C	G	Ppef2	c.1055G>C	p.Arg352Pro	missense_variant	MODERATE	19	0	0.051	18	7	0.422	2.50989
Aplan_7298_NR_1000nM_C1_vs_Aplan_7298_NR_Parent	chr5	101889268	101889268	C	G	Wdfy3	c.6152G>C	p.Arg2051Pro	missense_variant	MODERATE	57	0	0.02	58	14	0.233	4.30007
Aplan_7298_NR_1000nM_C1_vs_Aplan_7298_NR_Parent	chr5	105480277	105480277	C	G	Lrrc8b	c.488C>G	p.Pro163Arg	missense_variant	MODERATE	61	0	0.018	71	18	0.261	5.32639
Aplan_7298_NR_1000nM_C1_vs_Aplan_7298_NR_Parent	chr5	106880517	106880517	C	G	Hfm1	c.2446G>C	p.Glu816Gln	missense_variant	MODERATE	102	0	0.011	99	24	0.251	6.06597
Aplan_7298_NR_1000nM_C1_vs_Aplan_7298_NR_Parent	chr5	107432881	107432881	G	C	Lpcat2b	c.75G>C	p.Gln25His	missense_variant	MODERATE	57	0	0.018	64	12	0.22	3.46718
Aplan_7298_NR_1000nM_C1_vs_Aplan_7298_NR_Parent	chr5	108216065	108216065	G	C	Ccdc18	c.3625G>C	p.Ala1209Pro	missense_variant	MODERATE	64	0	0.019	78	15	0.203	3.91818
Aplan_7298_NR_1000nM_C1_vs_Aplan_7298_NR_Parent	chr5	108658220	108658220	G	C	Dgkq	c.319C>G	p.Pro107Ala	missense_variant	MODERATE	91	0	0.013	71	19	0.273	7.48083
Aplan_7298_NR_1000nM_C1_vs_Aplan_7298_NR_Parent	chr5	110363147	110363147	C	G	Fbrsl1	c.2991G>C	p.Ala997Ala	synonymous_variant	LOW	15	0	0.063	16	5	0.353	1.3627
Aplan_7298_NR_1000nM_C1_vs_Aplan_7298_NR_Parent	chr5	111225625	111225625	G	C	Ttc28	c.2833G>C	p.Gly945Arg	missense_variant	MODERATE	114	0	0.009576	90	30	0.329	6.40511
Aplan_7298_NR_1000nM_C1_vs_Aplan_7298_NR_Parent	chr5	112259294	112259294	G	C	Crybb1	c.212G>C	p.Arg71Pro	missense_variant	MODERATE	86	0	0.013	64	16	0.278	6.44789
Aplan_7298_NR_1000nM_C1_vs_Aplan_7298_NR_Parent	chr5	112785657	112785657	C	G	Myo18b	c.5279G>C	p.Arg1760Pro	missense_variant	MODERATE	104	0	0.011	88	22	0.273	6.16255
Aplan_7298_NR_1000nM_C1_vs_Aplan_7298_NR_Parent	chr5	112811632	112811632	G	C	Myo18b	c.4298C>G	p.Pro1433Arg	missense_variant	MODERATE	55	1	0.023	37	10	0.277	3.42908
Aplan_7298_NR_1000nM_C1_vs_Aplan_7298_NR_Parent	chr5	113795272	113795272	C	G	Tmem119	c.467G>C	p.Arg156Pro	missense_variant	MODERATE	59	1	0.019	52	13	0.27	3.60226
Aplan_7298_NR_1000nM_C1_vs_Aplan_7298_NR_Parent	chr5	114446204	114446204	C	G	Mvk	c.124C>G	p.Arg42Gly	missense_variant	MODERATE	49	0	0.022	56	16	0.303	4.84249
Aplan_7298_NR_1000nM_C1_vs_Aplan_7298_NR_Parent	chr5	114611501	114611501	C	G	Fam222a	c.757C>G	p.Arg253Gly	missense_variant	MODERATE	36	0	0.029	21	7	0.35	3.35673
Aplan_7298_NR_1000nM_C1_vs_Aplan_7298_NR_Parent	chr5	115250045	115250045	C	G	Rnf10	c.1053G>C	p.Ala351Ala	synonymous_variant	LOW	33	0	0.028	30	9	0.304	3.2186
Aplan_7298_NR_1000nM_C1_vs_Aplan_7298_NR_Parent	chr5	115614947	115614947	C	G	Gcn1l1	c.6750C>G	p.His2250Gln	missense_variant	MODERATE	28	0	0.035	42	11	0.274	2.6492
Aplan_7298_NR_1000nM_C1_vs_Aplan_7298_NR_Parent	chr5	117685550	117685550	G	C	Ksr2	c.1391G>C	p.Arg464Pro	missense_variant	MODERATE	80	1	0.016	51	13	0.262	4.79335
Aplan_7298_NR_1000nM_C1_vs_Aplan_7298_NR_Parent	chr5	120623607	120623607	C	T	Ddx54	c.1447C>T	p.Arg483Cys	missense_variant	MODERATE	115	0	0.01	123	30	0.243	6.17455
Aplan_7298_NR_1000nM_C1_vs_Aplan_7298_NR_Parent	chr5	121593419	121593419	G	C	Aldh2	c.63C>G	p.Ala21Ala	synonymous_variant	LOW	32	0	0.037	18	6	0.293	2.93247
Aplan_7298_NR_1000nM_C1_vs_Aplan_7298_NR_Parent	chr5	122727394	122727394	G	C	P2rx4	c.979-5G>C		splice_region_variant&intron_variant	LOW	206	0	0.00541	191	41	0.228	6.22558
Aplan_7298_NR_1000nM_C1_vs_Aplan_7298_NR_Parent	chr5	123934115	123934115	G	A	Ccdc62	c.206G>A	p.Arg69Gln	missense_variant	MODERATE	42	0	0.028	45	11	0.268	3.28794
Aplan_7298_NR_1000nM_C1_vs_Aplan_7298_NR_Parent	chr5	123934176	123934176	G	C	Ccdc62	c.267G>C	p.Met89Ile	missense_variant	MODERATE	45	0	0.027	46	11	0.224	3.30419
Aplan_7298_NR_1000nM_C1_vs_Aplan_7298_NR_Parent	chr5	124080028	124080028	C	G	Abcb9	c.1239+5G>C		splice_region_variant&intron_variant	LOW	63	0	0.018	42	9	0.243	3.82862
Aplan_7298_NR_1000nM_C1_vs_Aplan_7298_NR_Parent	chr5	124089938	124089938	C	G	Abcb9	c.239G>C	p.Arg80Pro	missense_variant	MODERATE	37	0	0.028	24	6	0.268	2.61546
Aplan_7298_NR_1000nM_C1_vs_Aplan_7298_NR_Parent	chr5	124530843	124530843	G	C	Rilpl1	c.141C>G	p.Cys47Trp	missense_variant	MODERATE	80	0	0.015	63	15	0.259	5.79647
Aplan_7298_NR_1000nM_C1_vs_Aplan_7298_NR_Parent	chr5	125294056	125294056	G	C	Scarb1	c.951C>G	p.Asn317Lys	missense_variant	MODERATE	62	0	0.017	81	16	0.21	4.16933
Aplan_7298_NR_1000nM_C1_vs_Aplan_7298_NR_Parent	chr5	129901811	129901811	G	C	Zbed5	c.600G>C	p.Ala200Ala	synonymous_variant	LOW	43	0	0.025	54	11	0.229	2.99133
Aplan_7298_NR_1000nM_C1_vs_Aplan_7298_NR_Parent	chr5	134163762	134163762	G	A	Wbscr16	c.822C>T	p.Gly274Gly	synonymous_variant	LOW	58	0	0.018	45	13	0.295	5.16619
Aplan_7298_NR_1000nM_C1_vs_Aplan_7298_NR_Parent	chr5	134590918	134590918	G	C	Rfc2	c.360G>C	p.Gln120His	missense_variant	MODERATE	65	0	0.017	57	14	0.283	5.04584
Aplan_7298_NR_1000nM_C1_vs_Aplan_7298_NR_Parent	chr5	137571640	137571640	C	G	Tfr2	c.439C>G	p.Arg147Gly	missense_variant	MODERATE	122	0	0.008881	83	21	0.26	6.07935
Aplan_7298_NR_1000nM_C1_vs_Aplan_7298_NR_Parent	chr5	137578965	137578965	G	C	Tfr2	c.1310G>C	p.Arg437Pro	missense_variant	MODERATE	157	0	0.007859	113	30	0.253	5.76894
Aplan_7298_NR_1000nM_C1_vs_Aplan_7298_NR_Parent	chr5	137637602	137637602	C	G	Lrch4	c.1006C>G	p.Arg336Gly	missense_variant	MODERATE	90	0	0.012	77	16	0.213	5.78486
Aplan_7298_NR_1000nM_C1_vs_Aplan_7298_NR_Parent	chr5	137641924	137641924	C	G	Sap25	c.196C>G	p.Arg66Gly	missense_variant	MODERATE	145	0	0.008202	110	22	0.215	7.03995
Aplan_7298_NR_1000nM_C1_vs_Aplan_7298_NR_Parent	chr5	137645127	137645127	G	C	Irs3	c.394C>G	p.Arg132Gly	missense_variant	MODERATE	43	0	0.024	34	10	0.277	3.92251
Aplan_7298_NR_1000nM_C1_vs_Aplan_7298_NR_Parent	chr5	137655202	137655202	C	G	Agfg2	c.1141G>C	p.Ala381Pro	missense_variant	MODERATE	101	0	0.012	75	24	0.348	6.26565
Aplan_7298_NR_1000nM_C1_vs_Aplan_7298_NR_Parent	chr5	137737982	137737982	C	G	Nyap1	c.242G>C	p.Arg81Pro	missense_variant	MODERATE	69	0	0.015	56	12	0.219	4.49897
Aplan_7298_NR_1000nM_C1_vs_Aplan_7298_NR_Parent	chr5	139544591	139544591	G	C	Uncx	c.423G>C	p.Ala141Ala	synonymous_variant	LOW	51	0	0.022	27	5	0.222	2.41748
Aplan_7298_NR_1000nM_C1_vs_Aplan_7298_NR_Parent	chr5	139972711	139972711	C	G	Elfn1	c.1469C>G	p.Pro490Arg	missense_variant	MODERATE	50	0	0.021	42	11	0.256	4.0989
Aplan_7298_NR_1000nM_C1_vs_Aplan_7298_NR_Parent	chr5	140088726	140088726	G	C	Mad1l1	c.1708C>G	p.Arg570Gly	missense_variant	MODERATE	75	0	0.015	71	17	0.266	5.80694
Aplan_7298_NR_1000nM_C1_vs_Aplan_7298_NR_Parent	chr5	142960886	142960886	C	G	Fscn1	c.438C>G	p.Ser146Arg	missense_variant	MODERATE	31	0	0.034	26	7	0.269	2.60414
Aplan_7298_NR_1000nM_C1_vs_Aplan_7298_NR_Parent	chr5	143877605	143877605	C	G	Eif2ak1	c.362C>G	p.Thr121Arg	missense_variant	MODERATE	88	0	0.013	87	21	0.244	6.60881
Aplan_7298_NR_1000nM_C1_vs_Aplan_7298_NR_Parent	chr5	145165120	145165120	G	C	Ptcd1	c.388C>G	p.Arg130Gly	missense_variant	MODERATE	96	0	0.012	116	33	0.29	6.20474
Aplan_7298_NR_1000nM_C1_vs_Aplan_7298_NR_Parent	chr6	29456345	29456345	C	G	Flnc	c.6541C>G	p.Arg2181Gly	missense_variant	MODERATE	120	0	0.00877	93	22	0.236	7.02712
Aplan_7298_NR_1000nM_C1_vs_Aplan_7298_NR_Parent	chr6	30626872	30626872	G	C	Cpa5	c.802G>C	p.Val268Leu	missense_variant	MODERATE	222	0	0.005231	172	36	0.209	6.2764
Aplan_7298_NR_1000nM_C1_vs_Aplan_7298_NR_Parent	chr6	30742149	30742149	G	C	Mest	c.211G>C	p.Gly71Arg	missense_variant	MODERATE	198	0	0.006183	159	34	0.218	6.2155
Aplan_7298_NR_1000nM_C1_vs_Aplan_7298_NR_Parent	chr6	34927791	34927791	C	G	Stra8	c.67C>G	p.Gln23Glu	missense_variant	MODERATE	38	0	0.027	28	8	0.25	3.26669
Aplan_7298_NR_1000nM_C1_vs_Aplan_7298_NR_Parent	chr6	39508281	39508281	G	C	Dennd2a	c.1063C>G	p.Arg355Gly	missense_variant	MODERATE	110	0	0.011	83	19	0.229	6.01466
Aplan_7298_NR_1000nM_C1_vs_Aplan_7298_NR_Parent	chr6	42434697	42434697	C	G	Tas2r126	c.163C>G	p.Arg55Gly	missense_variant	MODERATE	200	1	0.005909	152	50	0.314	5.90488
Aplan_7298_NR_1000nM_C1_vs_Aplan_7298_NR_Parent	chr6	42838212	42838212	G	C	Olfr449	c.330G>C	p.Thr110Thr	synonymous_variant	LOW	201	1	0.008765	166	40	0.25	5.84528
Aplan_7298_NR_1000nM_C1_vs_Aplan_7298_NR_Parent	chr6	46484077	46484077	C	G	Cntnap2	c.2046C>G	p.Cys682Trp	missense_variant	MODERATE	72	0	0.017	60	12	0.232	4.39688
Aplan_7298_NR_1000nM_C1_vs_Aplan_7298_NR_Parent	chr6	54933598	54933598	C	G	Nod1	c.2583G>C	p.Ala861Ala	synonymous_variant	LOW	91	0	0.013	50	15	0.306	7.43434
Aplan_7298_NR_1000nM_C1_vs_Aplan_7298_NR_Parent	chr6	58857742	58857742	G	C	Herc3	c.733G>C	p.Val245Leu	missense_variant	MODERATE	40	0	0.031	31	7	0.226	2.70393
Aplan_7298_NR_1000nM_C1_vs_Aplan_7298_NR_Parent	chr6	64729987	64729987	C	G	Atoh1	c.665C>G	p.Pro222Arg	missense_variant	MODERATE	86	0	0.013	74	22	0.289	6.30018
Aplan_7298_NR_1000nM_C1_vs_Aplan_7298_NR_Parent	chr6	71262100	71262100	C	G	Smyd1	c.105G>C	p.Ala35Ala	synonymous_variant	LOW	72	0	0.016	66	18	0.245	6.37261
Aplan_7298_NR_1000nM_C1_vs_Aplan_7298_NR_Parent	chr6	83005673	83005673	G	C	M1ap	c.932+5G>C		splice_region_variant&intron_variant	LOW	41	0	0.028	37	12	0.308	4.37005
Aplan_7298_NR_1000nM_C1_vs_Aplan_7298_NR_Parent	chr6	83506838	83506838	G	C	Dguok	c.52C>G	p.Pro18Ala	missense_variant	MODERATE	62	0	0.019	59	14	0.239	4.75529
Aplan_7298_NR_1000nM_C1_vs_Aplan_7298_NR_Parent	chr6	85484106	85484106	C	G	Fbxo41	c.619G>C	p.Ala207Pro	missense_variant	MODERATE	59	0	0.018	45	14	0.311	5.67807
Aplan_7298_NR_1000nM_C1_vs_Aplan_7298_NR_Parent	chr6	87059422	87059422	G	C	Gfpt1	c.586G>C	p.Gly196Arg	missense_variant	MODERATE	141	0	0.008181	140	39	0.284	6.34698
Aplan_7298_NR_1000nM_C1_vs_Aplan_7298_NR_Parent	chr6	90809780	90809780	C	A	Iqsec1	c.11G>T	p.Arg4Leu	missense_variant	MODERATE	60	0	0.018	61	11	0.226	3.22484
Aplan_7298_NR_1000nM_C1_vs_Aplan_7298_NR_Parent	chr6	92816619	92816619	C	G	Adamts9	c.2794G>C	p.Val932Leu	missense_variant	MODERATE	53	0	0.022	67	15	0.264	3.96471
Aplan_7298_NR_1000nM_C1_vs_Aplan_7298_NR_Parent	chr6	94609081	94609081	C	G	Lrig1	c.2125G>C	p.Gly709Arg	missense_variant	MODERATE	56	0	0.021	49	11	0.212	3.93202
Aplan_7298_NR_1000nM_C1_vs_Aplan_7298_NR_Parent	chr6	99726255	99726255	G	C	Prok2	c.66C>G	p.Pro22Pro	synonymous_variant	LOW	26	0	0.044	29	9	0.26	2.68477
Aplan_7298_NR_1000nM_C1_vs_Aplan_7298_NR_Parent	chr6	101172314	101172314	G	A	Pdzrn3	c.1052C>T	p.Ser351Leu	missense_variant	MODERATE	50	0	0.021	46	11	0.261	3.82023
Aplan_7298_NR_1000nM_C1_vs_Aplan_7298_NR_Parent	chr6	108518732	108518732	C	G	Itpr1	c.7577C>G	p.Thr2526Arg	missense_variant	MODERATE	52	0	0.021	43	11	0.262	4.13274
Aplan_7298_NR_1000nM_C1_vs_Aplan_7298_NR_Parent	chr6	112310616	112310617	GG	CC	Lmcd1	c.262_263delGGinsCC	p.Gly88Pro	missense_variant	MODERATE	51	0	0.021	50	18	0.354	5.90955
Aplan_7298_NR_1000nM_C1_vs_Aplan_7298_NR_Parent	chr6	112310709	112310709	G	C	Lmcd1	c.355G>C	p.Glu119Gln	missense_variant	MODERATE	61	0	0.017	54	11	0.225	3.87117
Aplan_7298_NR_1000nM_C1_vs_Aplan_7298_NR_Parent	chr6	113748844	113748844	C	G	Atp2b2	c.3290G>C	p.Arg1097Pro	missense_variant	MODERATE	52	0	0.02	52	14	0.26	4.3517
Aplan_7298_NR_1000nM_C1_vs_Aplan_7298_NR_Parent	chr6	116208218	116208218	G	C	Fam21	c.12G>C	p.Thr4Thr	synonymous_variant	LOW	61	0	0.019	52	10	0.202	3.5938
Aplan_7298_NR_1000nM_C1_vs_Aplan_7298_NR_Parent	chr6	121026974	121026974	G	C	Mical3	c.1686C>G	p.Pro562Pro	synonymous_variant	LOW	66	0	0.016	90	22	0.244	5.67553
Aplan_7298_NR_1000nM_C1_vs_Aplan_7298_NR_Parent	chr6	124747920	124747920	C	G	Atn1	c.349G>C	p.Gly117Arg	missense_variant	MODERATE	76	0	0.014	79	21	0.261	6.65722
Aplan_7298_NR_1000nM_C1_vs_Aplan_7298_NR_Parent	chr6	125307296	125307296	G	C	Ltbr	c.1182C>G	p.Pro394Pro	synonymous_variant	LOW	37	0	0.028	51	22	0.426	5.74522
Aplan_7298_NR_1000nM_C1_vs_Aplan_7298_NR_Parent	chr6	125642826	125642826	G	C	Vwf	c.4466G>C	p.Gly1489Ala	missense_variant	MODERATE	66	0	0.017	50	10	0.2	3.89988
Aplan_7298_NR_1000nM_C1_vs_Aplan_7298_NR_Parent	chr6	128526616	128526616	G	T	Pzp	c.49C>A	p.Leu17Ile	missense_variant	MODERATE	26	0	0.04	28	9	0.334	2.72438
Aplan_7298_NR_1000nM_C1_vs_Aplan_7298_NR_Parent	chr6	132737232	132737232	G	C	Tas2r115	c.755C>G	p.Ser252*	stop_gained	HIGH	70	0	0.015	81	18	0.224	5.27599
Aplan_7298_NR_1000nM_C1_vs_Aplan_7298_NR_Parent	chr6	141466155	141466155	C	G	Pde3a	c.1454C>G	p.Thr485Arg	missense_variant	MODERATE	65	0	0.018	62	17	0.281	5.85795
Aplan_7298_NR_1000nM_C1_vs_Aplan_7298_NR_Parent	chr6	145171688	145171688	C	G	Lrmp	c.1150C>G	p.Arg384Gly	missense_variant	MODERATE	67	0	0.016	69	17	0.254	5.29592
Aplan_7298_NR_1000nM_C1_vs_Aplan_7298_NR_Parent	chr7	3366755	3366755	C	G	Cacng7	c.635C>G	p.Pro212Arg	missense_variant	MODERATE	82	0	0.013	109	26	0.237	6.33691
Aplan_7298_NR_1000nM_C1_vs_Aplan_7298_NR_Parent	chr7	3671328	3671328	G	C	Tmc4	c.1023C>G	p.Leu341Leu	synonymous_variant	LOW	91	1	0.013	94	26	0.293	5.90913
Aplan_7298_NR_1000nM_C1_vs_Aplan_7298_NR_Parent	chr7	4486426	4486426	G	C	Ppp1r12c	c.895C>G	p.Arg299Gly	missense_variant	MODERATE	70	0	0.017	59	14	0.232	5.1664
Aplan_7298_NR_1000nM_C1_vs_Aplan_7298_NR_Parent	chr7	4698758	4698758	G	C	Brsk1	c.517G>C	p.Ala173Pro	missense_variant	MODERATE	42	0	0.026	45	8	0.214	2.24346
Aplan_7298_NR_1000nM_C1_vs_Aplan_7298_NR_Parent	chr7	4707217	4707217	C	G	Brsk1	c.1449C>G	p.Pro483Pro	synonymous_variant	LOW	45	0	0.024	25	6	0.279	2.86944
Aplan_7298_NR_1000nM_C1_vs_Aplan_7298_NR_Parent	chr7	4751969	4751969	G	C	Cox6b2	c.220C>G	p.Arg74Gly	missense_variant	MODERATE	85	0	0.013	72	19	0.269	7.07324
Aplan_7298_NR_1000nM_C1_vs_Aplan_7298_NR_Parent	chr7	4993736	4993736	C	G	Zfp579	c.1175G>C	p.Arg392Pro	missense_variant	MODERATE	49	0	0.022	45	15	0.342	5.43059
Aplan_7298_NR_1000nM_C1_vs_Aplan_7298_NR_Parent	chr7	6711610	6711610	G	C	Peg3	c.612C>G	p.Ser204Ser	synonymous_variant	LOW	131	0	0.008042	139	32	0.242	6.04708
Aplan_7298_NR_1000nM_C1_vs_Aplan_7298_NR_Parent	chr7	8255282	8255282	G	C	Vmn2r43	c.931C>G	p.Arg311Gly	missense_variant	MODERATE	338	1	0.003398	443	125	0.283	5.69667
Aplan_7298_NR_1000nM_C1_vs_Aplan_7298_NR_Parent	chr7	13008100	13008100	G	C	Zbtb45	c.230C>G	p.Ala77Gly	missense_variant	MODERATE	34	0	0.028	36	12	0.303	3.77162
Aplan_7298_NR_1000nM_C1_vs_Aplan_7298_NR_Parent	chr7	16144963	16144963	C	G	Slc8a2	c.1373C>G	p.Thr458Arg	missense_variant	MODERATE	41	0	0.027	32	13	0.467	5.39507
Aplan_7298_NR_1000nM_C1_vs_Aplan_7298_NR_Parent	chr7	16811475	16811475	C	G	Fkrp	c.461G>C	p.Arg154Pro	missense_variant	MODERATE	31	0	0.033	27	6	0.25	2.13588
Aplan_7298_NR_1000nM_C1_vs_Aplan_7298_NR_Parent	chr7	19368820	19368820	G	C	Ppp1r13l	c.159G>C	p.Ser53Ser	synonymous_variant	LOW	122	0	0.008961	118	35	0.305	6.15452
Aplan_7298_NR_1000nM_C1_vs_Aplan_7298_NR_Parent	chr7	19639000	19639000	G	C	Clptm1	c.604C>G	p.Arg202Gly	missense_variant	MODERATE	132	0	0.009227	152	42	0.287	5.91374
Aplan_7298_NR_1000nM_C1_vs_Aplan_7298_NR_Parent	chr7	24125085	24125085	C	T	Zfp112	c.489C>T	p.His163His	synonymous_variant	LOW	56	0	0.018	58	15	0.238	4.65613
Aplan_7298_NR_1000nM_C1_vs_Aplan_7298_NR_Parent	chr7	24421243	24421243	C	G	Smg9	c.1463C>G	p.Thr488Arg	missense_variant	MODERATE	30	0	0.032	30	10	0.31	3.09853
Aplan_7298_NR_1000nM_C1_vs_Aplan_7298_NR_Parent	chr7	24872899	24872899	G	C	Dmrtc2	c.344G>C	p.Arg115Pro	missense_variant	MODERATE	42	0	0.025	18	6	0.333	3.43085
Aplan_7298_NR_1000nM_C1_vs_Aplan_7298_NR_Parent	chr7	24978944	24978944	G	C	Atp1a3	c.2983C>G	p.Arg995Gly	missense_variant	MODERATE	43	0	0.025	43	14	0.346	4.46167
Aplan_7298_NR_1000nM_C1_vs_Aplan_7298_NR_Parent	chr7	25058498	25058498	C	G	Grik5	c.1157G>C	p.Arg386Pro	missense_variant	MODERATE	55	0	0.02	58	12	0.228	3.56985
Aplan_7298_NR_1000nM_C1_vs_Aplan_7298_NR_Parent	chr7	25367771	25367771	G	C	Cnfn	c.352C>G	p.Arg118Gly	missense_variant	MODERATE	35	0	0.031	33	9	0.275	3.10645
Aplan_7298_NR_1000nM_C1_vs_Aplan_7298_NR_Parent	chr7	26611347	26611347	C	G	Vmn1r185	c.732G>C	p.Leu244Leu	synonymous_variant	LOW	116	0	0.009429	137	41	0.321	5.77386
Aplan_7298_NR_1000nM_C1_vs_Aplan_7298_NR_Parent	chr7	27665067	27665067	C	G	Map3k10	c.895G>C	p.Gly299Arg	missense_variant	MODERATE	22	0	0.044	17	7	0.407	2.89811
Aplan_7298_NR_1000nM_C1_vs_Aplan_7298_NR_Parent	chr7	28144031	28144031	G	C	9530053A07Rik	c.2343G>C	p.Ala781Ala	synonymous_variant	LOW	62	0	0.017	47	13	0.299	5.22065
Aplan_7298_NR_1000nM_C1_vs_Aplan_7298_NR_Parent	chr7	28390883	28390883	C	T	Med29	c.286G>A	p.Ala96Thr	missense_variant	MODERATE	53	0	0.02	69	17	0.254	4.56307
Aplan_7298_NR_1000nM_C1_vs_Aplan_7298_NR_Parent	chr7	28788029	28788029	C	G	Sirt2	c.1127C>G	p.Ala376Gly	missense_variant	MODERATE	85	0	0.013	74	18	0.236	6.52333
Aplan_7298_NR_1000nM_C1_vs_Aplan_7298_NR_Parent	chr7	29024070	29024070	G	C	Ryr1	c.12569C>G	p.Ser4190Trp	missense_variant	MODERATE	56	0	0.019	56	20	0.352	6.61833
Aplan_7298_NR_1000nM_C1_vs_Aplan_7298_NR_Parent	chr7	29053152	29053152	G	C	Ryr1	c.10737C>G	p.Gly3579Gly	synonymous_variant	LOW	89	0	0.012	85	23	0.271	6.35334
Aplan_7298_NR_1000nM_C1_vs_Aplan_7298_NR_Parent	chr7	29161698	29161698	C	G	Spred3	c.1055G>C	p.Cys352Ser	missense_variant	MODERATE	46	0	0.024	52	16	0.333	4.92155
Aplan_7298_NR_1000nM_C1_vs_Aplan_7298_NR_Parent	chr7	30226901	30226901	G	C	Tbcb	c.490C>G	p.Arg164Gly	missense_variant	MODERATE	41	0	0.027	48	9	0.218	2.49625
Aplan_7298_NR_1000nM_C1_vs_Aplan_7298_NR_Parent	chr7	30427567	30427567	C	G	Nfkbid	c.907C>G	p.Arg303Gly	missense_variant	MODERATE	70	0	0.017	57	13	0.228	4.89036
Aplan_7298_NR_1000nM_C1_vs_Aplan_7298_NR_Parent	chr7	30860605	30860605	C	G	Ffar1	c.866G>C	p.Cys289Ser	missense_variant	MODERATE	70	0	0.016	56	15	0.272	5.80147
Aplan_7298_NR_1000nM_C1_vs_Aplan_7298_NR_Parent	chr7	33287526	33287526	G	C	Scgb1b19	c.101G>C	p.Arg34Pro	missense_variant	MODERATE	131	0	0.008881	152	40	0.278	6.18597
Aplan_7298_NR_1000nM_C1_vs_Aplan_7298_NR_Parent	chr7	44665403	44665403	C	G	Myh14	c.95G>C	p.Arg32Pro	missense_variant	MODERATE	103	0	0.01	73	16	0.239	6.58042
Aplan_7298_NR_1000nM_C1_vs_Aplan_7298_NR_Parent	chr7	45076663	45076663	C	G	Nosip	c.649C>G	p.Arg217Gly	missense_variant	MODERATE	138	0	0.007826	108	26	0.241	5.9954
Aplan_7298_NR_1000nM_C1_vs_Aplan_7298_NR_Parent	chr7	45181733	45181733	C	G	Pth2	c.264C>G	p.Asp88Glu	missense_variant	MODERATE	67	0	0.016	61	17	0.327	6.05901
Aplan_7298_NR_1000nM_C1_vs_Aplan_7298_NR_Parent	chr7	45235468	45235468	G	C	Cd37	c.689C>G	p.Ala230Gly	missense_variant	MODERATE	45	0	0.026	41	12	0.308	4.28686
Aplan_7298_NR_1000nM_C1_vs_Aplan_7298_NR_Parent	chr7	45369201	45369201	G	C	Lin7b	c.378C>G	p.Gly126Gly	synonymous_variant	LOW	106	0	0.011	70	22	0.35	6.78143
Aplan_7298_NR_1000nM_C1_vs_Aplan_7298_NR_Parent	chr7	45377264	45377264	G	C	Snrnp70	c.680C>G	p.Pro227Arg	missense_variant	MODERATE	149	0	0.007577	140	29	0.208	6.15337
Aplan_7298_NR_1000nM_C1_vs_Aplan_7298_NR_Parent	chr7	45679190	45679190	G	C	Sec1	c.432C>G	p.Ser144Arg	missense_variant	MODERATE	70	0	0.017	71	14	0.216	4.22151
Aplan_7298_NR_1000nM_C1_vs_Aplan_7298_NR_Parent	chr7	46754054	46754054	G	A	Saa2	c.314G>A	p.Arg105His	missense_variant	MODERATE	53	0	0.021	66	26	0.39	6.13527
Aplan_7298_NR_1000nM_C1_vs_Aplan_7298_NR_Parent	chr7	49452553	49452553	C	G	Nav2	c.1098C>G	p.Ser366Arg	missense_variant	MODERATE	130	0	0.009835	91	25	0.281	5.98998
Aplan_7298_NR_1000nM_C1_vs_Aplan_7298_NR_Parent	chr7	66968843	66968843	G	C	Adamts17	c.1104G>C	p.Lys368Asn	missense_variant	MODERATE	36	0	0.029	46	14	0.318	3.79813
Aplan_7298_NR_1000nM_C1_vs_Aplan_7298_NR_Parent	chr7	68214969	68214969	G	T	Igf1r	c.3514G>T	p.Gly1172Trp	missense_variant	MODERATE	68	0	0.016	61	14	0.25	4.93777
Aplan_7298_NR_1000nM_C1_vs_Aplan_7298_NR_Parent	chr7	68361309	68361309	C	G	Fam169b	c.1001C>G	p.Ala334Gly	missense_variant	MODERATE	42	0	0.026	37	9	0.294	3.21864
Aplan_7298_NR_1000nM_C1_vs_Aplan_7298_NR_Parent	chr7	79381672	79381672	G	C	Rlbp1	c.307C>G	p.Arg103Gly	missense_variant	MODERATE	84	0	0.015	54	12	0.235	5.24918
Aplan_7298_NR_1000nM_C1_vs_Aplan_7298_NR_Parent	chr7	79710368	79710368	C	A	Kif7	c.1120G>T	p.Gly374Trp	missense_variant	MODERATE	28	0	0.034	23	5	0.229	1.84392
Aplan_7298_NR_1000nM_C1_vs_Aplan_7298_NR_Parent	chr7	79726651	79726651	G	C	Plin1	c.336C>G	p.Ile112Met	missense_variant&splice_region_variant	MODERATE	41	0	0.026	49	12	0.255	3.43688
Aplan_7298_NR_1000nM_C1_vs_Aplan_7298_NR_Parent	chr7	80082285	80082285	C	G	Zfp710	c.1209C>G	p.His403Gln	missense_variant	MODERATE	80	0	0.014	63	13	0.226	4.9611
Aplan_7298_NR_1000nM_C1_vs_Aplan_7298_NR_Parent	chr7	80260462	80260462	G	A	Ttll13	c.2352G>A	p.Thr784Thr	synonymous_variant	LOW	79	0	0.014	85	17	0.21	5.12713
Aplan_7298_NR_1000nM_C1_vs_Aplan_7298_NR_Parent	chr7	80378864	80378864	C	G	Fes	c.2117G>C	p.Arg706Pro	missense_variant	MODERATE	24	0	0.039	43	8	0.225	1.3639
Aplan_7298_NR_1000nM_C1_vs_Aplan_7298_NR_Parent	chr7	81164329	81164329	G	C	Slc28a1	c.1273G>C	p.Val425Leu	missense_variant	MODERATE	65	0	0.017	68	22	0.335	6.20775
Aplan_7298_NR_1000nM_C1_vs_Aplan_7298_NR_Parent	chr7	81484503	81484503	C	G	Ap3b2	c.283G>C	p.Val95Leu	missense_variant	MODERATE	53	0	0.022	45	10	0.256	3.64249
Aplan_7298_NR_1000nM_C1_vs_Aplan_7298_NR_Parent	chr7	84305250	84305250	G	C	Arnt2	c.735C>G	p.Asn245Lys	missense_variant	MODERATE	82	1	0.015	72	17	0.239	4.88005
Aplan_7298_NR_1000nM_C1_vs_Aplan_7298_NR_Parent	chr7	87246800	87246800	C	G	Nox4	c.-46C>G		5_prime_UTR_premature_start_codon_gain_variant	LOW	16	0	0.061	13	5	0.343	1.96507
Aplan_7298_NR_1000nM_C1_vs_Aplan_7298_NR_Parent	chr7	90403096	90403096	G	C	Sytl2	c.2388G>C	p.Pro796Pro	synonymous_variant	LOW	92	0	0.013	112	27	0.235	5.94907
Aplan_7298_NR_1000nM_C1_vs_Aplan_7298_NR_Parent	chr7	99164670	99164670	C	G	Dgat2	c.394G>C	p.Val132Leu	missense_variant	MODERATE	68	0	0.018	48	14	0.28	5.92393
Aplan_7298_NR_1000nM_C1_vs_Aplan_7298_NR_Parent	chr7	100498242	100498242	C	G	Ucp2	c.502C>G	p.Arg168Gly	missense_variant	MODERATE	118	0	0.008738	112	26	0.253	5.96864
Aplan_7298_NR_1000nM_C1_vs_Aplan_7298_NR_Parent	chr7	100879703	100879703	C	G	Arhgef17	c.4727G>C	p.Gly1576Ala	missense_variant	MODERATE	50	0	0.022	47	14	0.328	4.91306
Aplan_7298_NR_1000nM_C1_vs_Aplan_7298_NR_Parent	chr7	100880021	100880021	C	A	Arhgef17	c.4585G>T	p.Glu1529*	stop_gained	HIGH	32	0	0.032	36	7	0.225	1.91783
Aplan_7298_NR_1000nM_C1_vs_Aplan_7298_NR_Parent	chr7	100880104	100880104	C	G	Arhgef17	c.4502G>C	p.Ser1501Thr	missense_variant	MODERATE	39	0	0.029	27	5	0.222	2.04415
Aplan_7298_NR_1000nM_C1_vs_Aplan_7298_NR_Parent	chr7	100931341	100931341	G	T	Arhgef17	c.399C>A	p.Phe133Leu	missense_variant	MODERATE	46	0	0.024	25	12	0.461	6.39127
Aplan_7298_NR_1000nM_C1_vs_Aplan_7298_NR_Parent	chr7	101504427	101504427	G	C	Pde2a	c.1351G>C	p.Asp451His	missense_variant	MODERATE	66	0	0.018	60	14	0.204	4.90008
Aplan_7298_NR_1000nM_C1_vs_Aplan_7298_NR_Parent	chr7	101824341	101824341	C	G	Inppl1	c.3101G>C	p.Arg1034Pro	missense_variant	MODERATE	49	0	0.022	50	13	0.282	4.00082
Aplan_7298_NR_1000nM_C1_vs_Aplan_7298_NR_Parent	chr7	102084011	102084011	C	G	Xntrpc	c.1288C>G	p.Arg430Gly	missense_variant	MODERATE	44	0	0.022	51	10	0.221	2.82101
Aplan_7298_NR_1000nM_C1_vs_Aplan_7298_NR_Parent	chr7	102113144	102113144	C	G	Chrna10	c.838G>C	p.Val280Leu	missense_variant	MODERATE	46	0	0.024	42	16	0.371	5.93925
Aplan_7298_NR_1000nM_C1_vs_Aplan_7298_NR_Parent	chr7	102113264	102113264	C	G	Chrna10	c.718G>C	p.Val240Leu	missense_variant	MODERATE	40	0	0.027	42	9	0.25	2.61002
Aplan_7298_NR_1000nM_C1_vs_Aplan_7298_NR_Parent	chr7	102949404	102949404	G	C	Olfr574	c.938G>C	p.Arg313Pro	missense_variant	MODERATE	80	0	0.015	72	18	0.267	6.39454
Aplan_7298_NR_1000nM_C1_vs_Aplan_7298_NR_Parent	chr7	104142022	104142022	G	C	Ubqln3	c.860C>G	p.Thr287Ser	missense_variant	MODERATE	53	0	0.02	75	27	0.356	6.5764
Aplan_7298_NR_1000nM_C1_vs_Aplan_7298_NR_Parent	chr7	108159246	108159246	G	C	Olfr485	c.626C>G	p.Ala209Gly	missense_variant	MODERATE	209	1	0.005242	259	73	0.282	5.77726
Aplan_7298_NR_1000nM_C1_vs_Aplan_7298_NR_Parent	chr7	110369575	110369575	G	C	Sbf2	c.2617C>G	p.Arg873Gly	missense_variant	MODERATE	38	0	0.029	47	11	0.254	3.05911
Aplan_7298_NR_1000nM_C1_vs_Aplan_7298_NR_Parent	chr7	110369586	110369586	G	C	Sbf2	c.2606C>G	p.Pro869Arg	missense_variant&splice_region_variant	MODERATE	36	0	0.03	42	10	0.255	2.86284
Aplan_7298_NR_1000nM_C1_vs_Aplan_7298_NR_Parent	chr7	110462872	110462872	G	C	Sbf2	c.497C>G	p.Ala166Gly	missense_variant	MODERATE	91	0	0.014	80	19	0.264	6.82684
Aplan_7298_NR_1000nM_C1_vs_Aplan_7298_NR_Parent	chr7	110560294	110560294	G	C	Sbf2	c.108C>G	p.Asp36Glu	missense_variant	MODERATE	66	0	0.019	102	20	0.207	4.49463
Aplan_7298_NR_1000nM_C1_vs_Aplan_7298_NR_Parent	chr7	114233234	114233234	G	C	Copb1	c.1579C>G	p.Leu527Val	missense_variant	MODERATE	32	0	0.033	36	10	0.295	2.96014
Aplan_7298_NR_1000nM_C1_vs_Aplan_7298_NR_Parent	chr7	115477029	115477029	G	C	Sox6	c.2373C>G	p.Asn791Lys	missense_variant	MODERATE	74	0	0.016	84	18	0.207	5.32234
Aplan_7298_NR_1000nM_C1_vs_Aplan_7298_NR_Parent	chr7	125452339	125452339	G	C	Kdm8	c.103G>C	p.Gly35Arg	missense_variant	MODERATE	51	0	0.021	50	10	0.2	3.27192
Aplan_7298_NR_1000nM_C1_vs_Aplan_7298_NR_Parent	chr7	126292091	126292091	G	C	Sbk1	c.696G>C	p.Thr232Thr	synonymous_variant	LOW	80	0	0.014	72	19	0.257	6.78925
Aplan_7298_NR_1000nM_C1_vs_Aplan_7298_NR_Parent	chr7	126575266	126575266	G	C	Cln3	c.907-8C>G		splice_region_variant&intron_variant	LOW	130	0	0.008245	101	23	0.234	5.82259
Aplan_7298_NR_1000nM_C1_vs_Aplan_7298_NR_Parent	chr7	126625021	126625021	C	G	Nupr1	c.125G>C	p.Arg42Pro	missense_variant	MODERATE	110	0	0.01	114	22	0.211	6.77995
Aplan_7298_NR_1000nM_C1_vs_Aplan_7298_NR_Parent	chr7	126783059	126783059	G	C	Tbx6	c.568G>C	p.Val190Leu	missense_variant	MODERATE	87	0	0.013	65	20	0.313	6.64153
Aplan_7298_NR_1000nM_C1_vs_Aplan_7298_NR_Parent	chr7	126848608	126848608	G	C	Doc2a	c.23G>C	p.Arg8Pro	missense_variant	MODERATE	29	0	0.042	28	6	0.241	1.98372
Aplan_7298_NR_1000nM_C1_vs_Aplan_7298_NR_Parent	chr7	127374051	127374051	C	G	Zfp747	c.946G>C	p.Glu316Gln	missense_variant	MODERATE	114	0	0.009034	134	37	0.266	5.83862
Aplan_7298_NR_1000nM_C1_vs_Aplan_7298_NR_Parent	chr7	127542383	127542383	C	G	Srcap	c.5334C>G	p.Leu1778Leu	synonymous_variant	LOW	119	0	0.008818	120	30	0.248	5.96063
Aplan_7298_NR_1000nM_C1_vs_Aplan_7298_NR_Parent	chr7	127611646	127611646	C	G	Zfp629	c.990G>C	p.Ser330Ser	synonymous_variant	LOW	43	0	0.028	38	9	0.25	3.20424
Aplan_7298_NR_1000nM_C1_vs_Aplan_7298_NR_Parent	chr7	128007839	128007839	G	A	Trim72	c.539G>A	p.Arg180Gln	missense_variant	MODERATE	70	0	0.016	44	13	0.309	5.92154
Aplan_7298_NR_1000nM_C1_vs_Aplan_7298_NR_Parent	chr7	128007917	128007917	G	C	Trim72	c.617G>C	p.Arg206Pro	missense_variant	MODERATE	75	0	0.016	43	10	0.238	4.70611
Aplan_7298_NR_1000nM_C1_vs_Aplan_7298_NR_Parent	chr7	128010293	128010293	C	G	Trim72	c.1266C>G	p.Gly422Gly	synonymous_variant	LOW	68	0	0.015	63	18	0.29	6.36
Aplan_7298_NR_1000nM_C1_vs_Aplan_7298_NR_Parent	chr7	128133136	128133136	G	C	Itgax	c.563G>C	p.Arg188Pro	missense_variant&splice_region_variant	MODERATE	119	1	0.009105	118	28	0.23	6.41582
Aplan_7298_NR_1000nM_C1_vs_Aplan_7298_NR_Parent	chr7	128148125	128148125	C	T	Itgax	c.3003+6C>T		splice_region_variant&intron_variant	LOW	121	0	0.008965	146	39	0.271	6.00356
Aplan_7298_NR_1000nM_C1_vs_Aplan_7298_NR_Parent	chr7	128186006	128186006	G	C	Itgad	c.1094G>C	p.Arg365Pro	missense_variant	MODERATE	92	0	0.012	68	15	0.227	6.00424
Aplan_7298_NR_1000nM_C1_vs_Aplan_7298_NR_Parent	chr7	128186017	128186017	C	G	Itgad	c.1105C>G	p.Arg369Gly	missense_variant	MODERATE	92	0	0.012	76	17	0.219	6.33317
Aplan_7298_NR_1000nM_C1_vs_Aplan_7298_NR_Parent	chr7	128191190	128191190	C	G	Itgad	c.2067C>G	p.Leu689Leu	synonymous_variant	LOW	116	0	0.009616	97	23	0.245	6.41598
Aplan_7298_NR_1000nM_C1_vs_Aplan_7298_NR_Parent	chr7	128205795	128205795	G	C	Cox6a2	c.228C>G	p.Asp76Glu	missense_variant	MODERATE	120	0	0.00944	117	33	0.29	5.98489
Aplan_7298_NR_1000nM_C1_vs_Aplan_7298_NR_Parent	chr7	131391902	131391902	C	G	Ikzf5	c.995G>C	p.Ser332Thr	missense_variant	MODERATE	131	0	0.008179	148	37	0.274	5.78927
Aplan_7298_NR_1000nM_C1_vs_Aplan_7298_NR_Parent	chr7	132269128	132269128	C	G	Chst15	c.677G>C	p.Arg226Pro	missense_variant	MODERATE	23	0	0.048	44	11	0.3	1.93319
Aplan_7298_NR_1000nM_C1_vs_Aplan_7298_NR_Parent	chr7	132876715	132876715	C	G	Fam175b	c.603C>G	p.His201Gln	missense_variant&splice_region_variant	MODERATE	87	0	0.013	93	22	0.239	6.05557
Aplan_7298_NR_1000nM_C1_vs_Aplan_7298_NR_Parent	chr7	132995360	132995360	C	G	Ctbp2	c.1993G>C	p.Ala665Pro	missense_variant	MODERATE	25	0	0.045	18	6	0.294	2.51641
Aplan_7298_NR_1000nM_C1_vs_Aplan_7298_NR_Parent	chr7	133671518	133671518	C	G	Edrf1	c.3701C>G	p.Ser1234Trp	missense_variant	MODERATE	38	0	0.029	33	7	0.209	2.49318
Aplan_7298_NR_1000nM_C1_vs_Aplan_7298_NR_Parent	chr7	139090280	139090280	A	C	Dpysl4	c.250A>C	p.Thr84Pro	missense_variant	MODERATE	32	0	0.035	26	6	0.222	2.24503
Aplan_7298_NR_1000nM_C1_vs_Aplan_7298_NR_Parent	chr7	139603903	139603903	C	G	Cfap46	c.7562G>C	p.Arg2521Pro	missense_variant	MODERATE	64	0	0.017	54	12	0.211	4.39573
Aplan_7298_NR_1000nM_C1_vs_Aplan_7298_NR_Parent	chr7	139847690	139847690	G	C	Adgra1	c.172G>C	p.Ala58Pro	missense_variant	MODERATE	59	0	0.018	77	18	0.24	4.81795
Aplan_7298_NR_1000nM_C1_vs_Aplan_7298_NR_Parent	chr7	140922521	140922521	C	T	Nlrp6	c.449C>T	p.Pro150Leu	missense_variant	MODERATE	61	0	0.018	64	25	0.36	6.1352
Aplan_7298_NR_1000nM_C1_vs_Aplan_7298_NR_Parent	chr7	141293932	141293932	C	G	Drd4	c.409C>G	p.Pro137Ala	missense_variant	MODERATE	85	0	0.012	74	20	0.278	7.33012
Aplan_7298_NR_1000nM_C1_vs_Aplan_7298_NR_Parent	chr7	141357567	141357567	G	C	Eps8l2	c.1093G>C	p.Asp365His	missense_variant	MODERATE	51	0	0.022	72	21	0.28	5.43785
Aplan_7298_NR_1000nM_C1_vs_Aplan_7298_NR_Parent	chr7	141357612	141357612	G	C	Eps8l2	c.1138G>C	p.Val380Leu	missense_variant	MODERATE	48	0	0.023	63	18	0.279	4.91977
Aplan_7298_NR_1000nM_C1_vs_Aplan_7298_NR_Parent	chr7	141411854	141411854	C	G	Pddc1	c.85G>C	p.Val29Leu	missense_variant	MODERATE	32	0	0.034	22	5	0.238	2.07952
Aplan_7298_NR_1000nM_C1_vs_Aplan_7298_NR_Parent	chr7	141981581	141981581	G	C	Brsk2	c.139G>C	p.Ala47Pro	missense_variant	MODERATE	41	0	0.029	41	10	0.222	2.97959
Aplan_7298_NR_1000nM_C1_vs_Aplan_7298_NR_Parent	chr7	142350463	142350463	G	C	Ifitm10	c.287C>G	p.Ala96Gly	missense_variant	MODERATE	37	0	0.029	35	12	0.344	4.26508
Aplan_7298_NR_1000nM_C1_vs_Aplan_7298_NR_Parent	chr8	11441335	11441335	C	G	Col4a2	c.3733C>G	p.Arg1245Gly	missense_variant	MODERATE	34	0	0.034	33	8	0.265	2.67189
Aplan_7298_NR_1000nM_C1_vs_Aplan_7298_NR_Parent	chr8	11542566	11542566	C	A	Cars2	c.373G>T	p.Ala125Ser	missense_variant	MODERATE	43	0	0.024	49	13	0.304	3.87292
Aplan_7298_NR_1000nM_C1_vs_Aplan_7298_NR_Parent	chr8	12997366	12997366	G	A	Mcf2l	c.727G>A	p.Ala243Thr	missense_variant	MODERATE	57	0	0.019	46	11	0.25	4.17466
Aplan_7298_NR_1000nM_C1_vs_Aplan_7298_NR_Parent	chr8	15027673	15027673	G	C	Kbtbd11	c.271G>C	p.Ala91Pro	missense_variant	MODERATE	32	0	0.033	24	6	0.269	2.38243
Aplan_7298_NR_1000nM_C1_vs_Aplan_7298_NR_Parent	chr8	15027814	15027814	G	C	Kbtbd11	c.412G>C	p.Gly138Arg	missense_variant	MODERATE	29	0	0.038	27	5	0.214	1.67501
Aplan_7298_NR_1000nM_C1_vs_Aplan_7298_NR_Parent	chr8	22561339	22561339	G	A	Slc20a2	c.1387G>A	p.Asp463Asn	missense_variant	MODERATE	32	0	0.033	43	16	0.357	4.46941
Aplan_7298_NR_1000nM_C1_vs_Aplan_7298_NR_Parent	chr8	24901445	24901445	G	C	Adam32	c.1052C>G	p.Ala351Gly	missense_variant	MODERATE	43	0	0.025	50	19	0.363	5.66885
Aplan_7298_NR_1000nM_C1_vs_Aplan_7298_NR_Parent	chr8	28675327	28675327	C	G	Unc5d	c.2435G>C	p.Arg812Pro	missense_variant	MODERATE	71	0	0.016	48	13	0.268	5.60725
Aplan_7298_NR_1000nM_C1_vs_Aplan_7298_NR_Parent	chr8	34818536	34818536	G	C	Dusp4	c.950G>C	p.Arg317Pro	missense_variant	MODERATE	51	0	0.021	59	13	0.201	3.76801
Aplan_7298_NR_1000nM_C1_vs_Aplan_7298_NR_Parent	chr8	36103863	36103863	C	G	D8Ertd82e	c.1599C>G	p.Pro533Pro	synonymous_variant	LOW	111	0	0.01	121	44	0.351	6.28628
Aplan_7298_NR_1000nM_C1_vs_Aplan_7298_NR_Parent	chr8	36139506	36139506	C	G	D8Ertd82e	c.2400C>G	p.Ala800Ala	synonymous_variant	LOW	136	0	0.008443	109	28	0.271	6.12859
Aplan_7298_NR_1000nM_C1_vs_Aplan_7298_NR_Parent	chr8	43674302	43674302	C	T	Gm5347	c.1660G>A	p.Glu554Lys	missense_variant	MODERATE	368	0	0.003019	424	129	0.308	5.74584
Aplan_7298_NR_1000nM_C1_vs_Aplan_7298_NR_Parent	chr8	44950568	44950568	C	G	Fat1	c.355C>G	p.Leu119Val	missense_variant	MODERATE	77	0	0.013	116	32	0.28	6.24939
Aplan_7298_NR_1000nM_C1_vs_Aplan_7298_NR_Parent	chr8	45023134	45023134	C	G	Fat1	c.5147C>G	p.Pro1716Arg	missense_variant	MODERATE	74	0	0.015	85	19	0.242	5.60497
Aplan_7298_NR_1000nM_C1_vs_Aplan_7298_NR_Parent	chr8	45355278	45355278	G	C	Fam149a	c.809C>G	p.Thr270Arg	missense_variant	MODERATE	51	0	0.023	43	12	0.297	4.49322
Aplan_7298_NR_1000nM_C1_vs_Aplan_7298_NR_Parent	chr8	62951870	62951870	C	G	Spock3	c.71C>G	p.Ala24Gly	missense_variant	MODERATE	115	0	0.011	119	24	0.212	5.96938
Aplan_7298_NR_1000nM_C1_vs_Aplan_7298_NR_Parent	chr8	69826518	69826518	C	G	Lpar2	c.961C>G	p.Arg321Gly	missense_variant	MODERATE	81	0	0.015	78	21	0.304	6.63987
Aplan_7298_NR_1000nM_C1_vs_Aplan_7298_NR_Parent	chr8	70019648	70019648	G	C	Mau2	c.1791C>G	p.Ala597Ala	synonymous_variant	LOW	70	0	0.015	61	15	0.241	5.43243
Aplan_7298_NR_1000nM_C1_vs_Aplan_7298_NR_Parent	chr8	70315971	70315971	G	C	Cers1	c.112G>C	p.Gly38Arg	missense_variant	MODERATE	25	0	0.045	23	8	0.348	2.88627
Aplan_7298_NR_1000nM_C1_vs_Aplan_7298_NR_Parent	chr8	70323186	70323186	G	C	Cers1	c.837G>C	p.Pro279Pro	synonymous_variant	LOW	113	0	0.009215	124	37	0.288	5.8557
Aplan_7298_NR_1000nM_C1_vs_Aplan_7298_NR_Parent	chr8	70330110	70330110	C	G	Gdf1	c.129C>G	p.Pro43Pro	synonymous_variant	LOW	37	0	0.031	27	8	0.277	3.29966
Aplan_7298_NR_1000nM_C1_vs_Aplan_7298_NR_Parent	chr8	70330736	70330736	G	C	Gdf1	c.333G>C	p.Ser111Ser	synonymous_variant	LOW	45	0	0.028	37	8	0.221	2.96528
Aplan_7298_NR_1000nM_C1_vs_Aplan_7298_NR_Parent	chr8	70331102	70331102	G	C	Gdf1	c.699G>C	p.Pro233Pro	synonymous_variant	LOW	37	0	0.028	35	8	0.272	2.70633
Aplan_7298_NR_1000nM_C1_vs_Aplan_7298_NR_Parent	chr8	70331307	70331307	G	C	Gdf1	c.904G>C	p.Ala302Pro	missense_variant	MODERATE	32	0	0.033	47	12	0.256	2.94189
Aplan_7298_NR_1000nM_C1_vs_Aplan_7298_NR_Parent	chr8	70333945	70333945	G	C	Upf1	c.2823C>G	p.Tyr941*	stop_gained	HIGH	51	0	0.02	48	10	0.22	3.37692
Aplan_7298_NR_1000nM_C1_vs_Aplan_7298_NR_Parent	chr8	70340083	70340083	G	C	Upf1	c.974C>G	p.Thr325Arg	missense_variant	MODERATE	54	0	0.021	56	12	0.211	3.5913
Aplan_7298_NR_1000nM_C1_vs_Aplan_7298_NR_Parent	chr8	70342159	70342159	G	C	Upf1	c.465C>G	p.Leu155Leu	synonymous_variant	LOW	59	0	0.019	46	13	0.31	5.13734
Aplan_7298_NR_1000nM_C1_vs_Aplan_7298_NR_Parent	chr8	70373617	70373617	C	G	Comp	c.46C>G	p.Arg16Gly	missense_variant	MODERATE	29	0	0.034	21	5	0.273	2.01754
Aplan_7298_NR_1000nM_C1_vs_Aplan_7298_NR_Parent	chr8	70374819	70374819	C	G	Comp	c.229C>G	p.Arg77Gly	missense_variant	MODERATE	25	0	0.04	16	5	0.353	2.23443
Aplan_7298_NR_1000nM_C1_vs_Aplan_7298_NR_Parent	chr8	70376212	70376212	G	C	Comp	c.613G>C	p.Gly205Arg	missense_variant	MODERATE	64	0	0.015	50	13	0.27	5.08678
Aplan_7298_NR_1000nM_C1_vs_Aplan_7298_NR_Parent	chr8	70376682	70376682	G	C	Comp	c.908G>C	p.Arg303Pro	missense_variant	MODERATE	140	0	0.00771	74	21	0.287	6.24963
Aplan_7298_NR_1000nM_C1_vs_Aplan_7298_NR_Parent	chr8	70381350	70381350	G	C	Comp	c.2014G>C	p.Val672Leu	missense_variant	MODERATE	42	0	0.026	40	13	0.3	4.56906
Aplan_7298_NR_1000nM_C1_vs_Aplan_7298_NR_Parent	chr8	70452225	70452225	G	A	Klhl26	c.1034C>T	p.Ala345Val	missense_variant	MODERATE	50	0	0.024	41	13	0.334	5.03668
Aplan_7298_NR_1000nM_C1_vs_Aplan_7298_NR_Parent	chr8	70452262	70452262	G	T	Klhl26	c.997C>A	p.Arg333Ser	missense_variant	MODERATE	43	0	0.024	42	14	0.333	4.8566
Aplan_7298_NR_1000nM_C1_vs_Aplan_7298_NR_Parent	chr8	70452592	70452592	G	C	Klhl26	c.667C>G	p.Arg223Gly	missense_variant	MODERATE	38	0	0.027	38	13	0.361	4.14928
Aplan_7298_NR_1000nM_C1_vs_Aplan_7298_NR_Parent	chr8	70618070	70618070	C	G	Lrrc25	c.500C>G	p.Pro167Arg	missense_variant	MODERATE	72	0	0.015	45	12	0.277	5.42567
Aplan_7298_NR_1000nM_C1_vs_Aplan_7298_NR_Parent	chr8	70677994	70677994	G	T	Lsm4	c.185G>T	p.Arg62Leu	missense_variant	MODERATE	31	0	0.033	32	10	0.344	3.06966
Aplan_7298_NR_1000nM_C1_vs_Aplan_7298_NR_Parent	chr8	70836329	70836329	G	C	Arrdc2	c.1061C>G	p.Ala354Gly	missense_variant	MODERATE	33	0	0.032	44	11	0.287	2.74804
Aplan_7298_NR_1000nM_C1_vs_Aplan_7298_NR_Parent	chr8	70836928	70836928	G	C	Arrdc2	c.942C>G	p.Ser314Ser	synonymous_variant	LOW	33	0	0.034	33	10	0.295	3.05678
Aplan_7298_NR_1000nM_C1_vs_Aplan_7298_NR_Parent	chr8	70839174	70839174	G	C	Arrdc2	c.228C>G	p.Ser76Arg	missense_variant	MODERATE	52	0	0.02	52	14	0.278	4.3517
Aplan_7298_NR_1000nM_C1_vs_Aplan_7298_NR_Parent	chr8	71474563	71474563	C	G	Dda1	c.274C>G	p.Arg92Gly	missense_variant	MODERATE	31	0	0.036	19	7	0.372	3.29717
Aplan_7298_NR_1000nM_C1_vs_Aplan_7298_NR_Parent	chr8	71508196	71508196	G	C	Plvap	c.575C>G	p.Ala192Gly	missense_variant	MODERATE	35	0	0.03	29	7	0.269	2.5999
Aplan_7298_NR_1000nM_C1_vs_Aplan_7298_NR_Parent	chr8	71562694	71562694	C	G	Nxnl1	c.569G>C	p.Arg190Pro	missense_variant	MODERATE	45	0	0.022	51	17	0.322	5.29297
Aplan_7298_NR_1000nM_C1_vs_Aplan_7298_NR_Parent	chr8	71693443	71693443	C	G	B3gnt3	c.441G>C	p.Val147Val	synonymous_variant	LOW	54	0	0.019	44	11	0.255	4.16463
Aplan_7298_NR_1000nM_C1_vs_Aplan_7298_NR_Parent	chr8	71693491	71693491	C	G	B3gnt3	c.393G>C	p.Ala131Ala	synonymous_variant	LOW	58	0	0.018	52	10	0.207	3.47194
Aplan_7298_NR_1000nM_C1_vs_Aplan_7298_NR_Parent	chr8	72319598	72319598	C	G	Klf2	c.245C>G	p.Pro82Arg	missense_variant	MODERATE	11	0	0.091	17	6	0.353	1.26024
Aplan_7298_NR_1000nM_C1_vs_Aplan_7298_NR_Parent	chr8	72580060	72580060	C	G	Tmem38a	c.382C>G	p.Arg128Gly	missense_variant	MODERATE	89	0	0.013	86	34	0.364	6.16009
Aplan_7298_NR_1000nM_C1_vs_Aplan_7298_NR_Parent	chr8	72580131	72580131	C	G	Tmem38a	c.453C>G	p.Thr151Thr	synonymous_variant	LOW	49	0	0.021	55	18	0.335	5.63005
Aplan_7298_NR_1000nM_C1_vs_Aplan_7298_NR_Parent	chr8	72666891	72666891	C	G	Nwd1	c.781C>G	p.Arg261Gly	missense_variant	MODERATE	44	0	0.024	58	17	0.316	4.63491
Aplan_7298_NR_1000nM_C1_vs_Aplan_7298_NR_Parent	chr8	72671040	72671040	C	G	Nwd1	c.1906C>G	p.Arg636Gly	missense_variant	MODERATE	26	0	0.038	32	10	0.285	2.8735
Aplan_7298_NR_1000nM_C1_vs_Aplan_7298_NR_Parent	chr8	72688170	72688170	C	G	Nwd1	c.2712C>G	p.His904Gln	missense_variant	MODERATE	50	0	0.023	33	8	0.31	3.45345
Aplan_7298_NR_1000nM_C1_vs_Aplan_7298_NR_Parent	chr8	72702814	72702814	C	G	Nwd1	c.3305-5C>G		splice_region_variant&intron_variant	LOW	46	0	0.028	36	9	0.277	3.49316
Aplan_7298_NR_1000nM_C1_vs_Aplan_7298_NR_Parent	chr8	81768182	81768182	G	C	Inpp4b	c.225G>C	p.Leu75Leu	synonymous_variant	LOW	49	0	0.026	36	8	0.235	3.20149
Aplan_7298_NR_1000nM_C1_vs_Aplan_7298_NR_Parent	chr8	83990560	83990560	C	G	Prkaca	c.546+6C>G		splice_region_variant&intron_variant	LOW	127	0	0.008785	125	42	0.31	5.93588
Aplan_7298_NR_1000nM_C1_vs_Aplan_7298_NR_Parent	chr8	84131173	84131173	G	C	Podnl1	c.1410G>C	p.Glu470Asp	missense_variant	MODERATE	37	0	0.031	34	16	0.437	6.16216
Aplan_7298_NR_1000nM_C1_vs_Aplan_7298_NR_Parent	chr8	84254272	84254272	G	C	Mri1	c.628C>G	p.Arg210Gly	missense_variant	MODERATE	33	0	0.03	34	12	0.352	3.82216
Aplan_7298_NR_1000nM_C1_vs_Aplan_7298_NR_Parent	chr8	84864277	84864277	C	G	Farsa	c.643C>G	p.Arg215Gly	missense_variant	MODERATE	85	1	0.013	74	16	0.229	4.5267
Aplan_7298_NR_1000nM_C1_vs_Aplan_7298_NR_Parent	chr8	86509818	86509818	C	G	Abcc12	c.3366G>C	p.Pro1122Pro	synonymous_variant	LOW	126	0	0.008927	141	31	0.235	6.40095
Aplan_7298_NR_1000nM_C1_vs_Aplan_7298_NR_Parent	chr8	86543882	86543882	C	T	Abcc12	c.1540G>A	p.Gly514Arg	missense_variant	MODERATE	94	0	0.013	89	19	0.201	5.80584
Aplan_7298_NR_1000nM_C1_vs_Aplan_7298_NR_Parent	chr8	88627716	88627716	C	G	Snx20	c.385G>C	p.Gly129Arg	missense_variant	MODERATE	26	0	0.04	18	5	0.356	2.10295
Aplan_7298_NR_1000nM_C1_vs_Aplan_7298_NR_Parent	chr8	88627778	88627778	G	C	Snx20	c.323C>G	p.Ala108Gly	missense_variant	MODERATE	26	0	0.043	20	7	0.444	2.83914
Aplan_7298_NR_1000nM_C1_vs_Aplan_7298_NR_Parent	chr8	94311653	94311653	C	G	Nup93	c.2341C>G	p.Arg781Gly	missense_variant	MODERATE	161	0	0.007136	163	45	0.275	6.22756
Aplan_7298_NR_1000nM_C1_vs_Aplan_7298_NR_Parent	chr8	94333591	94333591	C	G	Slc12a3	c.654C>G	p.Gly218Gly	synonymous_variant	LOW	80	0	0.014	59	14	0.24	5.64399
Aplan_7298_NR_1000nM_C1_vs_Aplan_7298_NR_Parent	chr8	94780503	94780503	C	G	Cx3cl1	c.1135C>G	p.Arg379Gly	missense_variant	MODERATE	29	0	0.033	31	6	0.201	1.61627
Aplan_7298_NR_1000nM_C1_vs_Aplan_7298_NR_Parent	chr8	94906040	94906040	G	C	Ccdc102a	c.1308C>G	p.Ala436Ala	synonymous_variant	LOW	33	0	0.031	30	9	0.344	3.2186
Aplan_7298_NR_1000nM_C1_vs_Aplan_7298_NR_Parent	chr8	104852324	104852324	G	C	Ces2c	c.1104G>C	p.Glu368Asp	missense_variant	MODERATE	39	0	0.024	44	14	0.322	4.30831
Aplan_7298_NR_1000nM_C1_vs_Aplan_7298_NR_Parent	chr8	105330183	105330183	C	G	Fhod1	c.3059G>C	p.Arg1020Pro	missense_variant	MODERATE	104	0	0.011	80	16	0.2	6.19423
Aplan_7298_NR_1000nM_C1_vs_Aplan_7298_NR_Parent	chr8	105359336	105359336	C	G	Slc9a5	c.1734C>G	p.Ser578Arg	missense_variant	MODERATE	47	0	0.022	51	12	0.242	3.58544
Aplan_7298_NR_1000nM_C1_vs_Aplan_7298_NR_Parent	chr8	105703302	105703302	G	C	Pard6a	c.981G>C	p.Glu327Asp	missense_variant	MODERATE	87	0	0.013	108	35	0.308	6.0056
Aplan_7298_NR_1000nM_C1_vs_Aplan_7298_NR_Parent	chr8	105841460	105841460	G	C	Tsnaxip1	c.857G>C	p.Arg286Pro	missense_variant	MODERATE	84	0	0.014	56	15	0.265	6.52689
Aplan_7298_NR_1000nM_C1_vs_Aplan_7298_NR_Parent	chr8	105929868	105929868	C	G	Pskh1	c.1175C>G	p.Thr392Arg	missense_variant	MODERATE	59	0	0.021	52	11	0.216	3.89402
Aplan_7298_NR_1000nM_C1_vs_Aplan_7298_NR_Parent	chr8	105996248	105996248	C	A	Dpep2	c.147G>T	p.Ser49Ser	synonymous_variant	LOW	33	0	0.033	33	9	0.281	2.68112
Aplan_7298_NR_1000nM_C1_vs_Aplan_7298_NR_Parent	chr8	106255652	106255652	C	G	Smpd3	c.1819G>C	p.Asp607His	missense_variant	MODERATE	34	0	0.029	26	5	0.2	1.91922
Aplan_7298_NR_1000nM_C1_vs_Aplan_7298_NR_Parent	chr8	106547630	106547630	G	C	Cdh3	c.1780G>C	p.Val594Leu	missense_variant	MODERATE	36	0	0.031	46	13	0.273	3.44085
Aplan_7298_NR_1000nM_C1_vs_Aplan_7298_NR_Parent	chr8	106659627	106659627	G	C	Cdh1	c.1181G>C	p.Arg394Pro	missense_variant	MODERATE	73	0	0.016	67	18	0.239	6.35673
Aplan_7298_NR_1000nM_C1_vs_Aplan_7298_NR_Parent	chr8	107425023	107425023	C	G	Nob1	c.6G>C	p.Ala2Ala	synonymous_variant	LOW	19	0	0.048	19	6	0.35	1.7065
Aplan_7298_NR_1000nM_C1_vs_Aplan_7298_NR_Parent	chr8	109650745	109650745	C	G	Pkd1l3	c.4826C>G	p.Pro1609Arg	missense_variant	MODERATE	19	0	0.053	23	5	0.26	1.27388
Aplan_7298_NR_1000nM_C1_vs_Aplan_7298_NR_Parent	chr8	109662212	109662212	C	G	Pkd1l3	c.5615C>G	p.Ala1872Gly	missense_variant	MODERATE	63	0	0.017	50	10	0.234	3.78134
Aplan_7298_NR_1000nM_C1_vs_Aplan_7298_NR_Parent	chr8	111165652	111165652	G	C	Glg1	c.2560C>G	p.Arg854Gly	missense_variant	MODERATE	52	0	0.023	74	27	0.388	6.62587
Aplan_7298_NR_1000nM_C1_vs_Aplan_7298_NR_Parent	chr8	111476136	111476136	C	G	Wdr59	c.1774G>C	p.Glu592Gln	missense_variant	MODERATE	42	0	0.027	43	13	0.344	4.07547
Aplan_7298_NR_1000nM_C1_vs_Aplan_7298_NR_Parent	chr8	111627132	111627132	G	C	Ldhd	c.1348C>G	p.Arg450Gly	missense_variant	MODERATE	53	0	0.021	63	18	0.283	5.07883
Aplan_7298_NR_1000nM_C1_vs_Aplan_7298_NR_Parent	chr8	111688627	111688627	G	C	Ctrb1	c.414C>G	p.Ala138Ala	synonymous_variant	LOW	23	0	0.048	21	7	0.368	2.51793
Aplan_7298_NR_1000nM_C1_vs_Aplan_7298_NR_Parent	chr8	116624075	116624075	G	C	Cdyl2	c.316C>G	p.Arg106Gly	missense_variant	MODERATE	64	0	0.016	67	21	0.319	6.78612
Aplan_7298_NR_1000nM_C1_vs_Aplan_7298_NR_Parent	chr8	117108727	117108727	C	G	Bco1	c.416C>G	p.Thr139Arg	missense_variant	MODERATE	80	0	0.014	99	26	0.265	6.05847
Aplan_7298_NR_1000nM_C1_vs_Aplan_7298_NR_Parent	chr8	117127528	117127528	C	G	Bco1	c.1191C>G	p.Pro397Pro	synonymous_variant	LOW	34	0	0.033	37	8	0.243	2.27283
Aplan_7298_NR_1000nM_C1_vs_Aplan_7298_NR_Parent	chr8	119768118	119768118	G	C	Tldc1	c.900C>G	p.Tyr300*	stop_gained	HIGH	32	0	0.034	34	13	0.313	4.20504
Aplan_7298_NR_1000nM_C1_vs_Aplan_7298_NR_Parent	chr8	120572866	120572866	C	G	Gse1	c.2634C>G	p.Thr878Thr	synonymous_variant	LOW	34	0	0.032	30	10	0.351	3.70256
Aplan_7298_NR_1000nM_C1_vs_Aplan_7298_NR_Parent	chr8	120658569	120658569	G	C	Emc8	c.423C>G	p.Tyr141*	stop_gained	HIGH	47	0	0.025	37	8	0.229	3.05276
Aplan_7298_NR_1000nM_C1_vs_Aplan_7298_NR_Parent	chr8	121117080	121117080	G	C	Foxc2	c.466G>C	p.Glu156Gln	missense_variant	MODERATE	47	0	0.023	53	10	0.2	2.84601
Aplan_7298_NR_1000nM_C1_vs_Aplan_7298_NR_Parent	chr8	121128805	121128805	G	C	Foxl1	c.844G>C	p.Ala282Pro	missense_variant	MODERATE	54	0	0.02	48	10	0.204	3.51277
Aplan_7298_NR_1000nM_C1_vs_Aplan_7298_NR_Parent	chr8	121753318	121753318	G	C	Jph3	c.734G>C	p.Arg245Pro	missense_variant	MODERATE	40	1	0.029	34	6	0.202	1.36408
Aplan_7298_NR_1000nM_C1_vs_Aplan_7298_NR_Parent	chr8	122357324	122357324	C	G	Trhr2	c.936G>C	p.Ser312Ser	synonymous_variant	LOW	35	0	0.029	29	7	0.243	2.5999
Aplan_7298_NR_1000nM_C1_vs_Aplan_7298_NR_Parent	chr8	122399119	122399119	C	G	Zc3h18	c.1105C>G	p.Arg369Gly	missense_variant	MODERATE	92	0	0.012	59	16	0.256	7.14516
Aplan_7298_NR_1000nM_C1_vs_Aplan_7298_NR_Parent	chr8	122424977	122424977	G	C	Cyba	c.480C>G	p.Pro160Pro	synonymous_variant	LOW	125	0	0.009352	75	16	0.217	7.29631
Aplan_7298_NR_1000nM_C1_vs_Aplan_7298_NR_Parent	chr8	122425035	122425035	C	G	Cyba	c.422G>C	p.Arg141Pro	missense_variant	MODERATE	99	0	0.011	59	17	0.287	6.39169
Aplan_7298_NR_1000nM_C1_vs_Aplan_7298_NR_Parent	chr8	122487233	122487233	C	G	Piezo1	c.4988G>C	p.Arg1663Pro	missense_variant	MODERATE	34	0	0.03	29	9	0.333	3.3735
Aplan_7298_NR_1000nM_C1_vs_Aplan_7298_NR_Parent	chr8	122575423	122575423	G	C	Aprt	c.300C>G	p.Ser100Ser	synonymous_variant	LOW	114	0	0.01	92	18	0.207	6.74229
Aplan_7298_NR_1000nM_C1_vs_Aplan_7298_NR_Parent	chr8	122848495	122848495	C	G	Cdh15	c.8C>G	p.Ser3Cys	missense_variant	MODERATE	75	0	0.016	84	17	0.208	5.03256
Aplan_7298_NR_1000nM_C1_vs_Aplan_7298_NR_Parent	chr8	122864712	122864712	G	C	Cdh15	c.1586G>C	p.Arg529Pro	missense_variant	MODERATE	46	0	0.024	39	11	0.307	4.10481
Aplan_7298_NR_1000nM_C1_vs_Aplan_7298_NR_Parent	chr8	122865013	122865013	C	G	Cdh15	c.1636C>G	p.Arg546Gly	missense_variant	MODERATE	50	0	0.021	33	9	0.256	3.93057
Aplan_7298_NR_1000nM_C1_vs_Aplan_7298_NR_Parent	chr8	122865373	122865373	C	G	Cdh15	c.1898C>G	p.Ser633Cys	missense_variant	MODERATE	212	0	0.005511	150	32	0.226	6.23231
Aplan_7298_NR_1000nM_C1_vs_Aplan_7298_NR_Parent	chr8	123395620	123395620	C	G	Tcf25	c.1291C>G	p.Gln431Glu	missense_variant	MODERATE	114	0	0.011	106	24	0.248	6.65707
Aplan_7298_NR_1000nM_C1_vs_Aplan_7298_NR_Parent	chr8	123408043	123408043	C	G	Mc1r	c.534C>G	p.Ile178Met	missense_variant	MODERATE	132	0	0.008215	103	21	0.214	6.53726
Aplan_7298_NR_1000nM_C1_vs_Aplan_7298_NR_Parent	chr8	123447873	123447873	C	G	Def8	c.148C>G	p.His50Asp	missense_variant	MODERATE	53	0	0.023	36	11	0.333	4.78379
Aplan_7298_NR_1000nM_C1_vs_Aplan_7298_NR_Parent	chr8	123892544	123892544	C	G	Acta1	c.808G>C	p.Gly270Arg	missense_variant&splice_region_variant	MODERATE	16	0	0.063	28	6	0.233	1.14369
Aplan_7298_NR_1000nM_C1_vs_Aplan_7298_NR_Parent	chr8	124370653	124370653	C	G	Pgbd5	c.1068G>C	p.Trp356Cys	missense_variant	MODERATE	40	0	0.027	49	15	0.334	4.14185
Aplan_7298_NR_1000nM_C1_vs_Aplan_7298_NR_Parent	chr8	125474945	125474945	C	G	Sipa1l2	c.1863G>C	p.Thr621Thr	synonymous_variant	LOW	70	0	0.018	30	6	0.233	3.30267
Aplan_7298_NR_1000nM_C1_vs_Aplan_7298_NR_Parent	chr8	125491449	125491449	C	G	Sipa1l2	c.1148G>C	p.Gly383Ala	missense_variant	MODERATE	157	0	0.00731	139	37	0.275	5.74692
Aplan_7298_NR_1000nM_C1_vs_Aplan_7298_NR_Parent	chr9	7505543	7505543	C	G	Mmp10	c.807C>G	p.Ser269Ser	synonymous_variant	LOW	41	0	0.028	65	14	0.217	3.12868
Aplan_7298_NR_1000nM_C1_vs_Aplan_7298_NR_Parent	chr9	9970653	9970653	C	G	Cntn5	c.1431G>C	p.Ser477Ser	synonymous_variant	LOW	53	0	0.022	58	13	0.243	3.87586
Aplan_7298_NR_1000nM_C1_vs_Aplan_7298_NR_Parent	chr9	14750968	14750968	G	C	Fut4	c.1029C>G	p.Leu343Leu	synonymous_variant	LOW	65	0	0.016	50	9	0.204	3.4482
Aplan_7298_NR_1000nM_C1_vs_Aplan_7298_NR_Parent	chr9	15059147	15059147	G	C	Hephl1	c.3042+8C>G		splice_region_variant&intron_variant	LOW	70	0	0.015	75	25	0.331	6.03848
Aplan_7298_NR_1000nM_C1_vs_Aplan_7298_NR_Parent	chr9	20889783	20889783	C	G	Ppan	c.355C>G	p.Arg119Gly	missense_variant	MODERATE	117	0	0.009261	87	25	0.29	5.95846
Aplan_7298_NR_1000nM_C1_vs_Aplan_7298_NR_Parent	chr9	20968282	20968282	G	C	S1pr2	c.249C>G	p.Gly83Gly	synonymous_variant	LOW	35	0	0.03	44	10	0.244	2.7329
Aplan_7298_NR_1000nM_C1_vs_Aplan_7298_NR_Parent	chr9	20968290	20968290	G	C	S1pr2	c.241C>G	p.Leu81Val	missense_variant	MODERATE	38	0	0.028	45	10	0.238	2.8222
Aplan_7298_NR_1000nM_C1_vs_Aplan_7298_NR_Parent	chr9	21025666	21025666	C	G	Icam1	c.451C>G	p.Arg151Gly	missense_variant	MODERATE	65	0	0.016	58	18	0.321	6.59093
Aplan_7298_NR_1000nM_C1_vs_Aplan_7298_NR_Parent	chr9	21029580	21029580	C	G	Icam4	c.127C>G	p.Arg43Gly	missense_variant	MODERATE	73	1	0.016	54	17	0.324	5.96419
Aplan_7298_NR_1000nM_C1_vs_Aplan_7298_NR_Parent	chr9	21038784	21038784	G	C	Icam5	c.2638G>C	p.Val880Leu	missense_variant	MODERATE	34	0	0.033	39	11	0.265	3.25853
Aplan_7298_NR_1000nM_C1_vs_Aplan_7298_NR_Parent	chr9	21038825	21038825	C	G	Icam5	c.2679C>G	p.Gly893Gly	synonymous_variant	LOW	34	0	0.03	39	7	0.222	1.89478
Aplan_7298_NR_1000nM_C1_vs_Aplan_7298_NR_Parent	chr9	21066057	21066057	G	C	Zglp1	c.461C>G	p.Pro154Arg	missense_variant	MODERATE	32	0	0.031	29	9	0.286	3.23844
Aplan_7298_NR_1000nM_C1_vs_Aplan_7298_NR_Parent	chr9	21079255	21079255	G	C	Raver1	c.1751C>G	p.Pro584Arg	missense_variant	MODERATE	42	0	0.024	30	9	0.344	3.77444
Aplan_7298_NR_1000nM_C1_vs_Aplan_7298_NR_Parent	chr9	21244876	21244876	C	G	S1pr5	c.253G>C	p.Ala85Pro	missense_variant	MODERATE	20	0	0.059	21	8	0.4	2.46242
Aplan_7298_NR_1000nM_C1_vs_Aplan_7298_NR_Parent	chr9	21392415	21392415	G	C	Ilf3	c.571G>C	p.Glu191Gln	missense_variant	MODERATE	65	0	0.018	56	17	0.271	6.3531
Aplan_7298_NR_1000nM_C1_vs_Aplan_7298_NR_Parent	chr9	21417269	21417269	C	G	Qtrt1	c.531-3C>G		splice_region_variant&intron_variant	LOW	42	0	0.026	28	7	0.277	3.00537
Aplan_7298_NR_1000nM_C1_vs_Aplan_7298_NR_Parent	chr9	21418319	21418319	G	C	Qtrt1	c.682G>C	p.Gly228Arg	missense_variant	MODERATE	42	0	0.026	49	12	0.255	3.48481
Aplan_7298_NR_1000nM_C1_vs_Aplan_7298_NR_Parent	chr9	39772011	39772011	G	C	Olfr968	c.788C>G	p.Ser263*	stop_gained	HIGH	203	1	0.011	233	57	0.252	5.75254
Aplan_7298_NR_1000nM_C1_vs_Aplan_7298_NR_Parent	chr9	44103758	44103758	C	G	Mfrp	c.981C>G	p.Tyr327*	stop_gained	HIGH	84	0	0.013	74	17	0.25	6.0778
Aplan_7298_NR_1000nM_C1_vs_Aplan_7298_NR_Parent	chr9	44111920	44111920	G	C	Rnf26	c.1030C>G	p.Arg344Gly	missense_variant	MODERATE	30	0	0.035	25	6	0.232	2.21402
Aplan_7298_NR_1000nM_C1_vs_Aplan_7298_NR_Parent	chr9	44152862	44152862	G	C	Cbl	c.2376C>G	p.Ala792Ala	synonymous_variant	LOW	56	0	0.02	50	19	0.362	5.99231
Aplan_7298_NR_1000nM_C1_vs_Aplan_7298_NR_Parent	chr9	44509168	44509168	C	G	Bcl9l	c.3870C>G	p.Pro1290Pro	synonymous_variant	LOW	62	0	0.018	85	18	0.211	4.38266
Aplan_7298_NR_1000nM_C1_vs_Aplan_7298_NR_Parent	chr9	44818549	44818549	G	C	Kmt2a	c.10461C>G	p.Asn3487Lys	missense_variant	MODERATE	66	0	0.017	57	12	0.222	4.30827
Aplan_7298_NR_1000nM_C1_vs_Aplan_7298_NR_Parent	chr9	44845476	44845476	C	G	Kmt2a	c.3473G>C	p.Cys1158Ser	missense_variant	MODERATE	34	0	0.032	31	9	0.292	3.20021
Aplan_7298_NR_1000nM_C1_vs_Aplan_7298_NR_Parent	chr9	45149284	45149284	C	G	Scn4b	c.482C>G	p.Thr161Arg	missense_variant	MODERATE	96	0	0.013	68	24	0.359	5.85603
Aplan_7298_NR_1000nM_C1_vs_Aplan_7298_NR_Parent	chr9	45447672	45447672	C	G	Dscaml1	c.228C>G	p.Pro76Pro	synonymous_variant	LOW	112	0	0.01	121	33	0.264	6.11451
Aplan_7298_NR_1000nM_C1_vs_Aplan_7298_NR_Parent	chr9	48494049	48494049	C	G	Rbm7	c.229G>C	p.Gly77Arg	missense_variant	MODERATE	80	0	0.014	116	25	0.226	6.05
Aplan_7298_NR_1000nM_C1_vs_Aplan_7298_NR_Parent	chr9	53301826	53301826	C	G	Exph5	c.94C>G	p.Arg32Gly	missense_variant	MODERATE	38	1	0.029	35	10	0.286	2.61694
Aplan_7298_NR_1000nM_C1_vs_Aplan_7298_NR_Parent	chr9	56227498	56227498	G	C	Peak1	c.3648C>G	p.Pro1216Pro	synonymous_variant	LOW	55	0	0.02	74	22	0.315	5.85176
Aplan_7298_NR_1000nM_C1_vs_Aplan_7298_NR_Parent	chr9	56898705	56898705	G	C	Cspg4	c.6799G>C	p.Ala2267Pro	missense_variant	MODERATE	64	0	0.017	53	18	0.329	7.01209
Aplan_7298_NR_1000nM_C1_vs_Aplan_7298_NR_Parent	chr9	57606012	57606012	C	G	Cplx3	c.133G>C	p.Glu45Gln	missense_variant	MODERATE	134	0	0.008648	87	25	0.309	6.82833
Aplan_7298_NR_1000nM_C1_vs_Aplan_7298_NR_Parent	chr9	57727434	57727434	C	G	Edc3	c.733C>G	p.Arg245Gly	missense_variant	MODERATE	85	0	0.014	67	22	0.322	6.11728
Aplan_7298_NR_1000nM_C1_vs_Aplan_7298_NR_Parent	chr9	58081995	58081995	G	C	Ccdc33	c.1129C>G	p.Arg377Gly	missense_variant	MODERATE	33	0	0.034	25	6	0.241	2.35897
Aplan_7298_NR_1000nM_C1_vs_Aplan_7298_NR_Parent	chr9	58157808	58157808	G	C	Islr	c.415C>G	p.Arg139Gly	missense_variant	MODERATE	61	0	0.017	69	23	0.359	6.86735
Aplan_7298_NR_1000nM_C1_vs_Aplan_7298_NR_Parent	chr9	58158077	58158077	G	C	Islr	c.146C>G	p.Pro49Arg	missense_variant	MODERATE	40	0	0.028	56	11	0.222	2.64725
Aplan_7298_NR_1000nM_C1_vs_Aplan_7298_NR_Parent	chr9	58198057	58198057	C	T	Islr2	c.2051G>A	p.Arg684His	missense_variant	MODERATE	84	0	0.013	81	22	0.288	5.99163
Aplan_7298_NR_1000nM_C1_vs_Aplan_7298_NR_Parent	chr9	58198410	58198410	C	G	Islr2	c.1698G>C	p.Pro566Pro	synonymous_variant	LOW	83	0	0.013	99	37	0.353	5.77946
Aplan_7298_NR_1000nM_C1_vs_Aplan_7298_NR_Parent	chr9	60737381	60737381	C	G	Larp6	c.803C>G	p.Ala268Gly	missense_variant	MODERATE	66	0	0.016	77	15	0.209	4.30393
Aplan_7298_NR_1000nM_C1_vs_Aplan_7298_NR_Parent	chr9	61937517	61937517	G	C	Kif23	c.229C>G	p.Arg77Gly	missense_variant	MODERATE	71	0	0.016	97	32	0.349	5.75838
Aplan_7298_NR_1000nM_C1_vs_Aplan_7298_NR_Parent	chr9	63144735	63144735	C	G	Skor1	c.1951G>C	p.Val651Leu	missense_variant	MODERATE	23	0	0.041	24	6	0.249	1.65884
Aplan_7298_NR_1000nM_C1_vs_Aplan_7298_NR_Parent	chr9	64308365	64308365	G	C	Dis3l	c.2596C>G	p.Arg866Gly	missense_variant	MODERATE	56	0	0.02	75	17	0.227	4.45432
Aplan_7298_NR_1000nM_C1_vs_Aplan_7298_NR_Parent	chr9	65556418	65556418	G	C	Plekho2	c.1148C>G	p.Ser383Trp	missense_variant	MODERATE	67	0	0.016	84	32	0.366	6.34627
Aplan_7298_NR_1000nM_C1_vs_Aplan_7298_NR_Parent	chr9	65686286	65686286	C	G	Oaz2	c.110C>G	p.His37Arg	missense_variant	MODERATE	79	0	0.015	50	15	0.319	6.82247
Aplan_7298_NR_1000nM_C1_vs_Aplan_7298_NR_Parent	chr9	65703842	65703842	G	C	Zfp609	c.1838C>G	p.Ser613Trp	missense_variant	MODERATE	105	0	0.01	112	29	0.263	5.91364
Aplan_7298_NR_1000nM_C1_vs_Aplan_7298_NR_Parent	chr9	66828688	66828688	G	C	Aph1c	c.343C>G	p.Arg115Gly	missense_variant	MODERATE	54	0	0.021	44	11	0.268	4.16463
Aplan_7298_NR_1000nM_C1_vs_Aplan_7298_NR_Parent	chr9	70376565	70376565	G	C	Myo1e	c.2542G>C	p.Val848Leu	missense_variant	MODERATE	69	0	0.015	84	19	0.257	5.23684
Aplan_7298_NR_1000nM_C1_vs_Aplan_7298_NR_Parent	chr9	73932786	73932786	C	T	Unc13c	c.782G>A	p.Arg261Gln	missense_variant	MODERATE	92	0	0.012	111	25	0.234	6.46997
Aplan_7298_NR_1000nM_C1_vs_Aplan_7298_NR_Parent	chr9	75217844	75217844	C	T	Myo5a	c.5413C>T	p.Arg1805Trp	missense_variant	MODERATE	78	0	0.014	82	19	0.247	5.88805
Aplan_7298_NR_1000nM_C1_vs_Aplan_7298_NR_Parent	chr9	75397608	75397608	G	C	Mapk6	c.526C>G	p.Arg176Gly	missense_variant	MODERATE	53	0	0.02	55	11	0.214	3.24582
Aplan_7298_NR_1000nM_C1_vs_Aplan_7298_NR_Parent	chr9	75635514	75635514	G	A	Lysmd2	c.402G>A	p.Pro134Pro	synonymous_variant	LOW	55	0	0.019	70	16	0.23	4.27052
Aplan_7298_NR_1000nM_C1_vs_Aplan_7298_NR_Parent	chr9	77982742	77982742	C	G	Elovl5	c.834C>G	p.Asn278Lys	missense_variant	MODERATE	25	0	0.042	28	7	0.28	1.96658
Aplan_7298_NR_1000nM_C1_vs_Aplan_7298_NR_Parent	chr9	82876164	82876164	G	C	Phip	c.4475C>G	p.Ala1492Gly	missense_variant	MODERATE	56	0	0.019	94	23	0.265	5.06254
Aplan_7298_NR_1000nM_C1_vs_Aplan_7298_NR_Parent	chr9	90094383	90094383	G	C	Morf4l1	c.891C>G	p.Tyr297*	stop_gained	HIGH	46	0	0.025	68	20	0.294	4.73617
Aplan_7298_NR_1000nM_C1_vs_Aplan_7298_NR_Parent	chr9	91364688	91364688	C	G	Zic1	c.330G>C	p.Ala110Ala	synonymous_variant	LOW	30	0	0.032	35	11	0.325	3.27805
Aplan_7298_NR_1000nM_C1_vs_Aplan_7298_NR_Parent	chr9	101023210	101023210	C	T	Pccb	c.475G>A	p.Gly159Arg	missense_variant	MODERATE	166	0	0.007521	145	43	0.313	6.10917
Aplan_7298_NR_1000nM_C1_vs_Aplan_7298_NR_Parent	chr9	105709099	105709099	C	G	Col6a6	c.5722G>C	p.Ala1908Pro	missense_variant	MODERATE	62	0	0.017	61	14	0.245	4.63208
Aplan_7298_NR_1000nM_C1_vs_Aplan_7298_NR_Parent	chr9	105925840	105925840	G	C	Col6a5	c.3925C>G	p.Arg1309Gly	missense_variant	MODERATE	76	0	0.014	76	15	0.216	4.54668
Aplan_7298_NR_1000nM_C1_vs_Aplan_7298_NR_Parent	chr9	106885350	106885350	G	C	Rbm15b	c.1618C>G	p.Arg540Gly	missense_variant	MODERATE	109	0	0.01	87	28	0.306	6.27794
Aplan_7298_NR_1000nM_C1_vs_Aplan_7298_NR_Parent	chr9	106885994	106885994	G	C	Rbm15b	c.974C>G	p.Pro325Arg	missense_variant	MODERATE	71	0	0.015	65	15	0.247	5.22193
Aplan_7298_NR_1000nM_C1_vs_Aplan_7298_NR_Parent	chr9	107582959	107582959	C	G	Nat6	c.52C>G	p.Arg18Gly	missense_variant	MODERATE	104	0	0.01	107	23	0.224	6.14884
Aplan_7298_NR_1000nM_C1_vs_Aplan_7298_NR_Parent	chr9	107603142	107603142	C	G	Sema3b	c.524G>C	p.Arg175Pro	missense_variant	MODERATE	143	0	0.00772	125	30	0.232	6.03354
Aplan_7298_NR_1000nM_C1_vs_Aplan_7298_NR_Parent	chr9	107692176	107692176	G	C	Sema3f	c.448C>G	p.Arg150Gly	missense_variant	MODERATE	85	0	0.013	81	21	0.279	6.58382
Aplan_7298_NR_1000nM_C1_vs_Aplan_7298_NR_Parent	chr9	107787805	107787805	C	G	Rbm6	c.2404G>C	p.Gly802Arg	missense_variant	MODERATE	121	0	0.009421	112	39	0.331	6.06581
Aplan_7298_NR_1000nM_C1_vs_Aplan_7298_NR_Parent	chr9	108056380	108056380	C	G	Rnf123	c.3410G>C	p.Arg1137Pro	missense_variant	MODERATE	36	0	0.032	40	9	0.27	2.58836
Aplan_7298_NR_1000nM_C1_vs_Aplan_7298_NR_Parent	chr9	108106181	108106181	C	G	Bsn	c.10673G>C	p.Arg3558Pro	missense_variant	MODERATE	86	0	0.012	91	24	0.29	6.08461
Aplan_7298_NR_1000nM_C1_vs_Aplan_7298_NR_Parent	chr9	108106701	108106701	C	G	Bsn	c.10153G>C	p.Glu3385Gln	missense_variant	MODERATE	129	0	0.007953	124	29	0.217	6.31193
Aplan_7298_NR_1000nM_C1_vs_Aplan_7298_NR_Parent	chr9	108106907	108106907	C	G	Bsn	c.9947G>C	p.Arg3316Pro	missense_variant	MODERATE	91	0	0.012	82	18	0.241	6.31349
Aplan_7298_NR_1000nM_C1_vs_Aplan_7298_NR_Parent	chr9	108111991	108111991	C	G	Bsn	c.6561G>C	p.Pro2187Pro	synonymous_variant	LOW	80	0	0.014	83	22	0.262	6.00225
Aplan_7298_NR_1000nM_C1_vs_Aplan_7298_NR_Parent	chr9	108114314	108114314	C	G	Bsn	c.4238G>C	p.Arg1413Pro	missense_variant	MODERATE	89	0	0.013	74	17	0.239	6.32014
Aplan_7298_NR_1000nM_C1_vs_Aplan_7298_NR_Parent	chr9	108116281	108116281	C	G	Bsn	c.2271G>C	p.Ala757Ala	synonymous_variant	LOW	107	0	0.009759	102	20	0.208	6.10082
Aplan_7298_NR_1000nM_C1_vs_Aplan_7298_NR_Parent	chr9	108406699	108406699	C	G	Ccdc36	c.545G>C	p.Arg182Pro	missense_variant	MODERATE	41	0	0.027	32	6	0.226	2.27382
Aplan_7298_NR_1000nM_C1_vs_Aplan_7298_NR_Parent	chr9	108448303	108448303	G	C	Klhdc8b	c.1051C>G	p.Arg351Gly	missense_variant	MODERATE	64	0	0.018	47	17	0.349	7.22086
Aplan_7298_NR_1000nM_C1_vs_Aplan_7298_NR_Parent	chr9	108977961	108977961	G	C	Col7a1	c.7362G>C	p.Pro2454Pro	synonymous_variant	LOW	174	0	0.0068	128	31	0.237	5.97669
Aplan_7298_NR_1000nM_C1_vs_Aplan_7298_NR_Parent	chr9	110086116	110086116	G	C	Dhx30	c.2580+4C>G		splice_region_variant&intron_variant	LOW	84	0	0.012	97	23	0.242	6.56657
Aplan_7298_NR_1000nM_C1_vs_Aplan_7298_NR_Parent	chr9	110428951	110428951	G	C	Klhl18	c.1405C>G	p.Arg469Gly	missense_variant	MODERATE	65	0	0.016	54	11	0.213	4.04194
Aplan_7298_NR_1000nM_C1_vs_Aplan_7298_NR_Parent	chr9	110628405	110628405	G	C	Nbeal2	c.6778C>G	p.Arg2260Gly	missense_variant	MODERATE	105	0	0.011	96	25	0.262	5.81258
Aplan_7298_NR_1000nM_C1_vs_Aplan_7298_NR_Parent	chr9	110725146	110725146	C	T	Pth1r	c.1016G>A	p.Trp339*	stop_gained	HIGH	139	1	0.017	98	20	0.221	7.07625
Aplan_7298_NR_1000nM_C1_vs_Aplan_7298_NR_Parent	chr9	114082525	114082525	G	C	Susd5	c.502G>C	p.Val168Leu	missense_variant	MODERATE	34	0	0.033	35	14	0.375	4.61962
Aplan_7298_NR_1000nM_C1_vs_Aplan_7298_NR_Parent	chr9	114492627	114492627	G	C	Ccr4	c.369C>G	p.Ser123Arg	missense_variant	MODERATE	121	0	0.008907	109	24	0.209	6.72273
Aplan_7298_NR_1000nM_C1_vs_Aplan_7298_NR_Parent	chr9	121914943	121914943	C	G	Cyp8b1	c.1322G>C	p.Gly441Ala	missense_variant	MODERATE	75	0	0.015	67	19	0.303	6.87813
Aplan_7298_NR_1000nM_C1_vs_Aplan_7298_NR_Parent	chr9	121915048	121915048	C	G	Cyp8b1	c.1217G>C	p.Arg406Pro	missense_variant	MODERATE	65	0	0.017	65	18	0.282	5.71054
Aplan_7298_NR_1000nM_C1_vs_Aplan_7298_NR_Parent	chr9	121915182	121915182	C	G	Cyp8b1	c.1083G>C	p.Glu361Asp	missense_variant	MODERATE	41	0	0.024	57	15	0.268	3.8792
Aplan_7298_NR_1000nM_C1_vs_Aplan_7298_NR_Parent	chr9	121915222	121915222	C	T	Cyp8b1	c.1043G>A	p.Arg348His	missense_variant	MODERATE	37	0	0.026	59	16	0.276	3.73922
Aplan_7298_NR_1000nM_C1_vs_Aplan_7298_NR_Parent	chr9	123822427	123822427	G	C	Fyco1	c.3567C>G	p.Phe1189Leu	missense_variant	MODERATE	61	0	0.019	48	13	0.309	5.08348
Aplan_7298_NR_1000nM_C1_vs_Aplan_7298_NR_Parent	chr9	123828386	123828386	G	C	Fyco1	c.2724C>G	p.Leu908Leu	synonymous_variant	LOW	66	0	0.017	93	29	0.315	5.88516
Aplan_7298_NR_1000nM_C1_vs_Aplan_7298_NR_Parent	chr9	124106748	124106748	G	C	Ccr2	c.1064G>C	p.Arg355Pro	missense_variant	MODERATE	51	0	0.02	71	14	0.204	3.4914
Aplan_7298_NR_1000nM_C1_vs_Aplan_7298_NR_Parent	chr10	3947609	3947609	C	G	Plekhg1	c.1399+6C>G		splice_region_variant&intron_variant	LOW	52	0	0.022	55	15	0.271	4.66307
Aplan_7298_NR_1000nM_C1_vs_Aplan_7298_NR_Parent	chr10	7160636	7160636	G	C	Cnksr3	c.216+8C>G		splice_region_variant&intron_variant	LOW	66	0	0.017	56	10	0.203	3.58778
Aplan_7298_NR_1000nM_C1_vs_Aplan_7298_NR_Parent	chr10	8729872	8729872	C	G	Sash1	c.2753G>C	p.Cys918Ser	missense_variant	MODERATE	99	0	0.011	80	18	0.218	6.81059
Aplan_7298_NR_1000nM_C1_vs_Aplan_7298_NR_Parent	chr10	13690558	13690558	C	G	Aig1	c.481G>C	p.Ala161Pro	missense_variant	MODERATE	61	0	0.018	68	28	0.392	6.11996
Aplan_7298_NR_1000nM_C1_vs_Aplan_7298_NR_Parent	chr10	19849570	19849570	G	C	Slc35d3	c.539C>G	p.Ala180Gly	missense_variant	MODERATE	73	0	0.015	53	13	0.261	5.30733
Aplan_7298_NR_1000nM_C1_vs_Aplan_7298_NR_Parent	chr10	24711934	24711934	C	G	Enpp1	c.58G>C	p.Gly20Arg	missense_variant	MODERATE	12	0	0.075	13	8	0.611	2.78315
Aplan_7298_NR_1000nM_C1_vs_Aplan_7298_NR_Parent	chr10	28585664	28585664	G	C	Ptprk	c.3407G>C	p.Arg1136Pro	missense_variant	MODERATE	58	0	0.019	72	21	0.294	5.98424
Aplan_7298_NR_1000nM_C1_vs_Aplan_7298_NR_Parent	chr10	28595843	28595843	G	C	Ptprk	c.4362G>C	p.Leu1454Leu	synonymous_variant	LOW	97	0	0.013	107	27	0.275	6.48819
Aplan_7298_NR_1000nM_C1_vs_Aplan_7298_NR_Parent	chr10	40257638	40257638	C	G	Gtf3c6	c.22G>C	p.Ala8Pro	missense_variant	MODERATE	158	0	0.007358	132	29	0.212	6.36178
Aplan_7298_NR_1000nM_C1_vs_Aplan_7298_NR_Parent	chr10	43021837	43021837	G	C	Sobp	c.1751C>G	p.Pro584Arg	missense_variant	MODERATE	43	0	0.025	35	9	0.294	3.41209
Aplan_7298_NR_1000nM_C1_vs_Aplan_7298_NR_Parent	chr10	45150519	45150519	C	G	Prep	c.1538C>G	p.Thr513Arg	missense_variant	MODERATE	43	0	0.027	50	12	0.239	3.48381
Aplan_7298_NR_1000nM_C1_vs_Aplan_7298_NR_Parent	chr10	45339308	45339308	C	G	Bves	c.78C>G	p.Pro26Pro	synonymous_variant	LOW	83	0	0.014	79	22	0.315	6.06044
Aplan_7298_NR_1000nM_C1_vs_Aplan_7298_NR_Parent	chr10	59428326	59428326	C	G	Oit3	c.985G>C	p.Val329Leu	missense_variant	MODERATE	142	0	0.00836	99	21	0.234	7.12849
Aplan_7298_NR_1000nM_C1_vs_Aplan_7298_NR_Parent	chr10	59438848	59438848	G	C	Oit3	c.129C>G	p.Asp43Glu	missense_variant	MODERATE	72	0	0.016	81	17	0.222	5.03566
Aplan_7298_NR_1000nM_C1_vs_Aplan_7298_NR_Parent	chr10	59789044	59789044	C	G	Micu1	c.925C>G	p.Arg309Gly	missense_variant	MODERATE	67	0	0.016	82	16	0.208	4.23522
Aplan_7298_NR_1000nM_C1_vs_Aplan_7298_NR_Parent	chr10	61300373	61300373	C	G	Prf1	c.427C>G	p.Arg143Gly	missense_variant	MODERATE	40	0	0.028	42	13	0.311	4.07481
Aplan_7298_NR_1000nM_C1_vs_Aplan_7298_NR_Parent	chr10	61323334	61323334	G	C	Pald1	c.2317C>G	p.Arg773Gly	missense_variant	MODERATE	38	1	0.027	41	9	0.237	1.82431
Aplan_7298_NR_1000nM_C1_vs_Aplan_7298_NR_Parent	chr10	67540907	67540907	G	C	Egr2	c.1332G>C	p.Ser444Ser	synonymous_variant	LOW	41	0	0.024	39	9	0.222	3.03914
Aplan_7298_NR_1000nM_C1_vs_Aplan_7298_NR_Parent	chr10	75608833	75608833	C	G	Ggt5	c.984C>G	p.Phe328Leu	missense_variant	MODERATE	39	0	0.031	51	11	0.217	2.70679
Aplan_7298_NR_1000nM_C1_vs_Aplan_7298_NR_Parent	chr10	77041835	77041835	C	G	Slc19a1	c.203C>G	p.Pro68Arg	missense_variant	MODERATE	80	0	0.014	54	11	0.233	4.63288
Aplan_7298_NR_1000nM_C1_vs_Aplan_7298_NR_Parent	chr10	78169643	78169643	G	A	D10Jhu81e	c.87C>T	p.Arg29Arg	synonymous_variant	LOW	26	0	0.04	39	9	0.25	2.06384
Aplan_7298_NR_1000nM_C1_vs_Aplan_7298_NR_Parent	chr10	79779969	79779969	C	G	Fstl3	c.288C>G	p.Ser96Ser	synonymous_variant	LOW	58	0	0.019	43	17	0.394	7.27841
Aplan_7298_NR_1000nM_C1_vs_Aplan_7298_NR_Parent	chr10	79866942	79866942	C	G	Plppr3	c.486G>C	p.Thr162Thr	synonymous_variant	LOW	36	0	0.033	30	7	0.233	2.58268
Aplan_7298_NR_1000nM_C1_vs_Aplan_7298_NR_Parent	chr10	79882959	79882959	C	G	Prtn3	c.748C>G	p.Arg250Gly	missense_variant	MODERATE	36	0	0.027	42	16	0.371	4.9954
Aplan_7298_NR_1000nM_C1_vs_Aplan_7298_NR_Parent	chr10	80021449	80021449	G	C	Hmha1	c.781G>C	p.Glu261Gln	missense_variant	MODERATE	82	0	0.013	75	19	0.271	6.68657
Aplan_7298_NR_1000nM_C1_vs_Aplan_7298_NR_Parent	chr10	80132046	80132046	C	G	Cbarp	c.1339G>C	p.Gly447Arg	missense_variant	MODERATE	92	0	0.011	56	15	0.291	6.90779
Aplan_7298_NR_1000nM_C1_vs_Aplan_7298_NR_Parent	chr10	80306192	80306192	C	G	Apc2	c.872C>G	p.Ala291Gly	missense_variant	MODERATE	45	0	0.023	41	9	0.244	3.11813
Aplan_7298_NR_1000nM_C1_vs_Aplan_7298_NR_Parent	chr10	80311964	80311964	G	C	Apc2	c.2764G>C	p.Gly922Arg	missense_variant	MODERATE	82	0	0.014	70	17	0.234	6.2404
Aplan_7298_NR_1000nM_C1_vs_Aplan_7298_NR_Parent	chr10	80381737	80381737	C	G	Mex3d	c.1645G>C	p.Ala549Pro	missense_variant	MODERATE	28	0	0.032	22	6	0.332	2.32833
Aplan_7298_NR_1000nM_C1_vs_Aplan_7298_NR_Parent	chr10	80520330	80520330	C	G	Atp8b3	c.3547G>C	p.Gly1183Arg	missense_variant	MODERATE	174	0	0.006603	124	38	0.314	6.12446
Aplan_7298_NR_1000nM_C1_vs_Aplan_7298_NR_Parent	chr10	80550612	80550612	C	G	Rexo1	c.611G>C	p.Arg204Pro	missense_variant	MODERATE	68	0	0.016	67	24	0.359	6.4257
Aplan_7298_NR_1000nM_C1_vs_Aplan_7298_NR_Parent	chr10	80638276	80638276	G	T	Csnk1g2	c.495G>T	p.Thr165Thr	synonymous_variant	LOW	47	0	0.022	43	17	0.383	6.34609
Aplan_7298_NR_1000nM_C1_vs_Aplan_7298_NR_Parent	chr10	80638873	80638873	C	T	Csnk1g2	c.850-7C>T		splice_region_variant&intron_variant	LOW	32	0	0.03	31	7	0.241	2.32305
Aplan_7298_NR_1000nM_C1_vs_Aplan_7298_NR_Parent	chr10	80835040	80835040	G	C	Lingo3	c.1055C>G	p.Pro352Arg	missense_variant	MODERATE	89	0	0.014	58	13	0.219	5.6445
Aplan_7298_NR_1000nM_C1_vs_Aplan_7298_NR_Parent	chr10	80835803	80835803	C	G	Lingo3	c.292G>C	p.Ala98Pro	missense_variant	MODERATE	45	0	0.023	49	17	0.344	5.44244
Aplan_7298_NR_1000nM_C1_vs_Aplan_7298_NR_Parent	chr10	80835939	80835939	C	G	Lingo3	c.156G>C	p.Pro52Pro	synonymous_variant	LOW	58	0	0.019	47	13	0.266	4.99672
Aplan_7298_NR_1000nM_C1_vs_Aplan_7298_NR_Parent	chr10	81079586	81079586	C	G	Thop1	c.879C>G	p.Thr293Thr	synonymous_variant	LOW	35	0	0.031	43	15	0.341	4.23452
Aplan_7298_NR_1000nM_C1_vs_Aplan_7298_NR_Parent	chr10	81079914	81079914	C	G	Thop1	c.930C>G	p.Arg310Arg	synonymous_variant	LOW	73	0	0.017	67	23	0.363	6.70257
Aplan_7298_NR_1000nM_C1_vs_Aplan_7298_NR_Parent	chr10	81080465	81080465	C	G	Thop1	c.1306C>G	p.Arg436Gly	missense_variant	MODERATE	69	0	0.016	47	13	0.304	5.59233
Aplan_7298_NR_1000nM_C1_vs_Aplan_7298_NR_Parent	chr10	83620704	83620704	G	C	Appl2	c.615C>G	p.His205Gln	missense_variant	MODERATE	29	0	0.039	31	11	0.376	3.45838
Aplan_7298_NR_1000nM_C1_vs_Aplan_7298_NR_Parent	chr10	84863311	84863311	C	G	Rfx4	c.1062C>G	p.Asp354Glu	missense_variant	MODERATE	51	0	0.021	48	11	0.2	3.74653
Aplan_7298_NR_1000nM_C1_vs_Aplan_7298_NR_Parent	chr10	86856712	86856712	C	G	Stab2	c.6296G>C	p.Gly2099Ala	missense_variant	MODERATE	39	0	0.027	63	15	0.266	3.39968
Aplan_7298_NR_1000nM_C1_vs_Aplan_7298_NR_Parent	chr10	89817992	89817992	G	C	Uhrf1bp1l	c.4315G>C	p.Ala1439Pro	missense_variant	MODERATE	36	0	0.028	42	14	0.334	4.25694
Aplan_7298_NR_1000nM_C1_vs_Aplan_7298_NR_Parent	chr10	93846420	93846420	C	G	Usp44	c.731C>G	p.Ala244Gly	missense_variant	MODERATE	34	0	0.028	32	8	0.264	2.73724
Aplan_7298_NR_1000nM_C1_vs_Aplan_7298_NR_Parent	chr10	93984199	93984199	G	C	Vezt	c.1303C>G	p.Arg435Gly	missense_variant	MODERATE	17	0	0.059	22	5	0.248	1.24806
Aplan_7298_NR_1000nM_C1_vs_Aplan_7298_NR_Parent	chr10	94944001	94944001	C	G	Plxnc1	c.578G>C	p.Arg193Pro	missense_variant	MODERATE	27	0	0.037	30	10	0.333	3.05006
Aplan_7298_NR_1000nM_C1_vs_Aplan_7298_NR_Parent	chr10	103215118	103215118	C	G	Lrriq1	c.1772G>C	p.Arg591Pro	missense_variant	MODERATE	250	0	0.004479	294	88	0.296	5.67433
Aplan_7298_NR_1000nM_C1_vs_Aplan_7298_NR_Parent	chr10	114800617	114800617	C	T	Trhde	c.684G>A	p.Ala228Ala	synonymous_variant	LOW	143	0	0.00794	128	27	0.229	6.30198
Aplan_7298_NR_1000nM_C1_vs_Aplan_7298_NR_Parent	chr10	116113462	116113462	C	G	4933416C03Rik	c.158G>C	p.Arg53Pro	missense_variant	MODERATE	76	0	0.015	82	28	0.352	5.87733
Aplan_7298_NR_1000nM_C1_vs_Aplan_7298_NR_Parent	chr10	116302198	116302198	G	C	Ptprb	c.145G>C	p.Ala49Pro	missense_variant	MODERATE	51	0	0.021	85	21	0.265	4.50637
Aplan_7298_NR_1000nM_C1_vs_Aplan_7298_NR_Parent	chr10	116341145	116341145	G	C	Ptprb	c.2974G>C	p.Gly992Arg	missense_variant	MODERATE	94	0	0.012	94	26	0.29	6.83659
Aplan_7298_NR_1000nM_C1_vs_Aplan_7298_NR_Parent	chr10	116493727	116493727	C	G	Cnot2	c.1387G>C	p.Gly463Arg	missense_variant	MODERATE	85	0	0.014	63	15	0.264	6.0319
Aplan_7298_NR_1000nM_C1_vs_Aplan_7298_NR_Parent	chr10	118294192	118294192	G	T	Iltifb	c.306C>A	p.Asp102Glu	missense_variant	MODERATE	86	0	0.013	122	31	0.252	6.28821
Aplan_7298_NR_1000nM_C1_vs_Aplan_7298_NR_Parent	chr10	119942891	119942891	C	G	Grip1	c.532C>G	p.Arg178Gly	missense_variant	MODERATE	62	0	0.018	56	17	0.301	6.15406
Aplan_7298_NR_1000nM_C1_vs_Aplan_7298_NR_Parent	chr10	120035417	120035417	G	C	Grip1	c.2048G>C	p.Gly683Ala	missense_variant	MODERATE	40	0	0.029	55	15	0.284	3.92176
Aplan_7298_NR_1000nM_C1_vs_Aplan_7298_NR_Parent	chr10	127170162	127170162	C	G	B4galnt1	c.1104C>G	p.Phe368Leu	missense_variant	MODERATE	82	0	0.013	45	12	0.29	5.87368
Aplan_7298_NR_1000nM_C1_vs_Aplan_7298_NR_Parent	chr10	127171097	127171097	C	G	B4galnt1	c.1430C>G	p.Ala477Gly	missense_variant	MODERATE	75	0	0.015	57	14	0.246	5.55128
Aplan_7298_NR_1000nM_C1_vs_Aplan_7298_NR_Parent	chr10	127326361	127326361	C	G	Arhgap9	c.885C>G	p.Ser295Arg	missense_variant	MODERATE	84	0	0.014	80	28	0.347	6.30867
Aplan_7298_NR_1000nM_C1_vs_Aplan_7298_NR_Parent	chr10	127326561	127326561	G	C	Arhgap9	c.960G>C	p.Thr320Thr	synonymous_variant	LOW	59	0	0.018	56	13	0.228	4.41249
Aplan_7298_NR_1000nM_C1_vs_Aplan_7298_NR_Parent	chr10	127326626	127326626	C	G	Arhgap9	c.1025C>G	p.Ala342Gly	missense_variant	MODERATE	45	0	0.026	50	15	0.306	4.62862
Aplan_7298_NR_1000nM_C1_vs_Aplan_7298_NR_Parent	chr10	127327202	127327202	C	G	Arhgap9	c.1300C>G	p.Arg434Gly	missense_variant	MODERATE	38	0	0.026	43	8	0.204	2.21977
Aplan_7298_NR_1000nM_C1_vs_Aplan_7298_NR_Parent	chr10	127332449	127332449	G	C	Gli1	c.1534C>G	p.Arg512Gly	missense_variant	MODERATE	51	0	0.025	38	13	0.305	5.41439
Aplan_7298_NR_1000nM_C1_vs_Aplan_7298_NR_Parent	chr10	127742353	127742353	C	G	Zbtb39	c.795C>G	p.Asn265Lys	missense_variant	MODERATE	90	0	0.012	102	25	0.241	5.85366
Aplan_7298_NR_1000nM_C1_vs_Aplan_7298_NR_Parent	chr10	127742648	127742648	C	G	Zbtb39	c.1090C>G	p.Arg364Gly	missense_variant	MODERATE	85	0	0.013	79	17	0.231	5.82573
Aplan_7298_NR_1000nM_C1_vs_Aplan_7298_NR_Parent	chr10	128408775	128408775	C	G	Nabp2	c.141G>C	p.Thr47Thr	synonymous_variant	LOW	73	0	0.015	60	11	0.2	4.04178
Aplan_7298_NR_1000nM_C1_vs_Aplan_7298_NR_Parent	chr10	128435418	128435418	C	G	Rnf41	c.196C>G	p.Arg66Gly	missense_variant	MODERATE	155	0	0.006908	161	35	0.223	5.94112
Aplan_7298_NR_1000nM_C1_vs_Aplan_7298_NR_Parent	chr10	128583414	128583414	G	C	Erbb3	c.684C>G	p.His228Gln	missense_variant	MODERATE	119	0	0.01	125	26	0.222	5.9241
Aplan_7298_NR_1000nM_C1_vs_Aplan_7298_NR_Parent	chr10	128583440	128583440	C	G	Erbb3	c.658G>C	p.Gly220Arg	missense_variant	MODERATE	103	0	0.011	108	29	0.275	5.89029
Aplan_7298_NR_1000nM_C1_vs_Aplan_7298_NR_Parent	chr10	128721371	128721371	G	C	Dgka	c.1734C>G	p.Cys578Trp	missense_variant	MODERATE	62	0	0.019	45	10	0.239	4.04195
Aplan_7298_NR_1000nM_C1_vs_Aplan_7298_NR_Parent	chr11	5058458	5058458	G	C	Rasl10a	c.153G>C	p.Ala51Ala	synonymous_variant	LOW	43	0	0.024	40	9	0.238	3.07993
Aplan_7298_NR_1000nM_C1_vs_Aplan_7298_NR_Parent	chr11	5873562	5873562	G	C	Pold2	c.866C>G	p.Ser289Trp	missense_variant	MODERATE	52	0	0.019	46	14	0.302	5.13359
Aplan_7298_NR_1000nM_C1_vs_Aplan_7298_NR_Parent	chr11	5901786	5901786	G	C	Gck	c.1282C>G	p.Arg428Gly	missense_variant	MODERATE	40	0	0.027	29	5	0.2	1.97606
Aplan_7298_NR_1000nM_C1_vs_Aplan_7298_NR_Parent	chr11	6401237	6401237	C	G	Zmiz2	c.1842C>G	p.His614Gln	missense_variant	MODERATE	70	0	0.016	66	23	0.34	5.94771
Aplan_7298_NR_1000nM_C1_vs_Aplan_7298_NR_Parent	chr11	6593693	6593693	G	C	Ccm2	c.895G>C	p.Glu299Gln	missense_variant	MODERATE	94	1	0.012	126	29	0.238	5.80612
Aplan_7298_NR_1000nM_C1_vs_Aplan_7298_NR_Parent	chr11	22836296	22836296	G	C	B3gnt2	c.891C>G	p.Thr297Thr	synonymous_variant	LOW	63	0	0.016	68	15	0.2	4.52822
Aplan_7298_NR_1000nM_C1_vs_Aplan_7298_NR_Parent	chr11	30506392	30506392	C	G	Acyp2	c.254G>C	p.Arg85Pro	missense_variant	MODERATE	43	0	0.025	62	19	0.329	4.85557
Aplan_7298_NR_1000nM_C1_vs_Aplan_7298_NR_Parent	chr11	32422370	32422370	G	C	Sh3pxd2b	c.1536G>C	p.Ser512Ser	synonymous_variant	LOW	29	0	0.033	34	8	0.229	2.23685
Aplan_7298_NR_1000nM_C1_vs_Aplan_7298_NR_Parent	chr11	36051892	36051892	A	T	Tenm2	c.3946T>A	p.Ser1316Thr	missense_variant	MODERATE	49	0	0.025	52	13	0.218	3.95865
Aplan_7298_NR_1000nM_C1_vs_Aplan_7298_NR_Parent	chr11	44410295	44410295	C	G	Il12b	c.637C>G	p.Arg213Gly	missense_variant	MODERATE	41	0	0.027	38	9	0.27	3.10125
Aplan_7298_NR_1000nM_C1_vs_Aplan_7298_NR_Parent	chr11	44525140	44525140	G	C	Rnf145	c.181G>C	p.Val61Leu	missense_variant	MODERATE	111	0	0.01	87	25	0.295	6.5941
Aplan_7298_NR_1000nM_C1_vs_Aplan_7298_NR_Parent	chr11	46134433	46134433	C	G	Adam19	c.1603C>G	p.Arg535Gly	missense_variant	MODERATE	46	0	0.026	47	10	0.214	2.94103
Aplan_7298_NR_1000nM_C1_vs_Aplan_7298_NR_Parent	chr11	46237789	46237789	G	C	Fndc9	c.134G>C	p.Arg45Pro	missense_variant	MODERATE	124	0	0.008777	133	29	0.221	5.81063
Aplan_7298_NR_1000nM_C1_vs_Aplan_7298_NR_Parent	chr11	50182498	50182498	G	C	3010026O09Rik	c.133G>C	p.Gly45Arg	missense_variant	MODERATE	59	0	0.02	52	13	0.267	4.67481
Aplan_7298_NR_1000nM_C1_vs_Aplan_7298_NR_Parent	chr11	50234296	50234296	G	C	Mgat4b	c.1475G>C	p.Arg492Pro	missense_variant	MODERATE	84	0	0.013	62	17	0.285	6.9532
Aplan_7298_NR_1000nM_C1_vs_Aplan_7298_NR_Parent	chr11	53465970	53465970	C	G	Shroom1	c.1659C>G	p.Val553Val	synonymous_variant	LOW	69	0	0.015	81	28	0.35	6.54474
Aplan_7298_NR_1000nM_C1_vs_Aplan_7298_NR_Parent	chr11	53478955	53478955	G	C	Sowaha	c.953C>G	p.Ala318Gly	missense_variant	MODERATE	12	0	0.081	21	5	0.237	0.876557
Aplan_7298_NR_1000nM_C1_vs_Aplan_7298_NR_Parent	chr11	54325163	54325163	C	G	Acsl6	c.548C>G	p.Pro183Arg	missense_variant	MODERATE	43	0	0.026	59	16	0.25	4.20276
Aplan_7298_NR_1000nM_C1_vs_Aplan_7298_NR_Parent	chr11	55151279	55151279	G	C	Slc36a3	c.43C>G	p.Arg15Gly	missense_variant	MODERATE	70	0	0.016	58	19	0.327	7.36505
Aplan_7298_NR_1000nM_C1_vs_Aplan_7298_NR_Parent	chr11	58052713	58052713	C	T	Larp1	c.2611C>T	p.Arg871Trp	missense_variant	MODERATE	63	0	0.018	47	16	0.34	6.6669
Aplan_7298_NR_1000nM_C1_vs_Aplan_7298_NR_Parent	chr11	59040399	59040399	G	C	Obscn	c.15001C>G	p.Arg5001Gly	missense_variant	MODERATE	37	0	0.031	32	11	0.353	4.15031
Aplan_7298_NR_1000nM_C1_vs_Aplan_7298_NR_Parent	chr11	59124675	59124675	C	G	Obscn	c.2970G>C	p.Lys990Asn	missense_variant	MODERATE	164	0	0.00691	123	39	0.317	6.01711
Aplan_7298_NR_1000nM_C1_vs_Aplan_7298_NR_Parent	chr11	60202167	60202167	G	C	Srebf1	c.2445C>G	p.Asp815Glu	missense_variant	MODERATE	53	0	0.022	39	7	0.223	2.75555
Aplan_7298_NR_1000nM_C1_vs_Aplan_7298_NR_Parent	chr11	60477561	60477561	C	G	Myo15	c.1146C>G	p.Ala382Ala	synonymous_variant	LOW	161	0	0.006698	144	31	0.217	6.32097
Aplan_7298_NR_1000nM_C1_vs_Aplan_7298_NR_Parent	chr11	60496519	60496519	C	G	Myo15	c.5728C>G	p.Arg1910Gly	missense_variant	MODERATE	57	0	0.02	46	10	0.222	3.76248
Aplan_7298_NR_1000nM_C1_vs_Aplan_7298_NR_Parent	chr11	60527379	60527379	G	C	Myo15	c.10490G>C	p.Arg3497Pro	missense_variant	MODERATE	46	1	0.027	56	12	0.229	2.26851
Aplan_7298_NR_1000nM_C1_vs_Aplan_7298_NR_Parent	chr11	60720446	60720446	C	G	Flii	c.1298G>C	p.Arg433Pro	missense_variant	MODERATE	47	0	0.021	65	18	0.292	4.53416
Aplan_7298_NR_1000nM_C1_vs_Aplan_7298_NR_Parent	chr11	60731459	60731459	C	G	Mief2	c.854C>G	p.Ser285Trp	missense_variant	MODERATE	37	0	0.029	32	10	0.343	3.72188
Aplan_7298_NR_1000nM_C1_vs_Aplan_7298_NR_Parent	chr11	61218051	61218051	G	C	Aldh3a1	c.1277G>C	p.Arg426Pro	missense_variant	MODERATE	69	0	0.015	83	22	0.273	6.29181
Aplan_7298_NR_1000nM_C1_vs_Aplan_7298_NR_Parent	chr11	64436566	64436566	C	G	Hs3st3a1	c.500C>G	p.Ala167Gly	missense_variant	MODERATE	61	0	0.018	63	18	0.288	5.72106
Aplan_7298_NR_1000nM_C1_vs_Aplan_7298_NR_Parent	chr11	67031089	67031089	C	G	Tmem220	c.284C>G	p.Ala95Gly	missense_variant	MODERATE	41	0	0.025	43	12	0.304	3.68686
Aplan_7298_NR_1000nM_C1_vs_Aplan_7298_NR_Parent	chr11	67259123	67259123	G	A	Myh4	c.5507G>A	p.Arg1836His	missense_variant	MODERATE	66	0	0.016	63	13	0.21	4.35199
Aplan_7298_NR_1000nM_C1_vs_Aplan_7298_NR_Parent	chr11	68892707	68892707	C	T	Rnf222	c.99C>T	p.Cys33Cys	synonymous_variant	LOW	98	0	0.011	72	25	0.338	6.13331
Aplan_7298_NR_1000nM_C1_vs_Aplan_7298_NR_Parent	chr11	68990718	68990718	C	G	Pfas	c.2919G>C	p.Arg973Arg	synonymous_variant	LOW	73	0	0.015	66	14	0.231	4.87898
Aplan_7298_NR_1000nM_C1_vs_Aplan_7298_NR_Parent	chr11	69359902	69359902	G	C	Chd3	c.2000C>G	p.Ala667Gly	missense_variant	MODERATE	60	0	0.018	60	15	0.264	4.64802
Aplan_7298_NR_1000nM_C1_vs_Aplan_7298_NR_Parent	chr11	69398183	69398183	C	G	Tmem88	c.43G>C	p.Gly15Arg	missense_variant	MODERATE	78	0	0.016	50	16	0.323	7.27779
Aplan_7298_NR_1000nM_C1_vs_Aplan_7298_NR_Parent	chr11	69589634	69589634	C	G	Trp53	c.835C>G	p.Arg279Gly	missense_variant	MODERATE	95	0	0.012	88	20	0.218	6.08996
Aplan_7298_NR_1000nM_C1_vs_Aplan_7298_NR_Parent	chr11	69623628	69623628	C	G	Sat2	c.483C>G	p.Gly161Gly	synonymous_variant	LOW	53	0	0.024	41	12	0.3	4.78146
Aplan_7298_NR_1000nM_C1_vs_Aplan_7298_NR_Parent	chr11	69817880	69817880	G	C	4933402P03Rik	c.258C>G	p.Asp86Glu	missense_variant	MODERATE	72	0	0.015	78	18	0.234	5.49718
Aplan_7298_NR_1000nM_C1_vs_Aplan_7298_NR_Parent	chr11	69940427	69940427	C	G	Ybx2	c.847C>G	p.Arg283Gly	missense_variant	MODERATE	46	0	0.022	52	12	0.226	3.52005
Aplan_7298_NR_1000nM_C1_vs_Aplan_7298_NR_Parent	chr11	69945439	69945439	C	G	Slc2a4	c.745G>C	p.Gly249Arg	missense_variant	MODERATE	78	0	0.014	68	14	0.229	4.99036
Aplan_7298_NR_1000nM_C1_vs_Aplan_7298_NR_Parent	chr11	69969527	69969527	C	A	Elp5	c.653G>T	p.Arg218Leu	missense_variant	MODERATE	19	0	0.056	23	11	0.462	3.47688
Aplan_7298_NR_1000nM_C1_vs_Aplan_7298_NR_Parent	chr11	70009180	70009180	G	C	Dvl2	c.1799G>C	p.Gly600Ala	missense_variant	MODERATE	49	0	0.022	36	8	0.235	3.20149
Aplan_7298_NR_1000nM_C1_vs_Aplan_7298_NR_Parent	chr11	70255253	70255253	C	G	Alox12	c.20G>C	p.Arg7Pro	missense_variant	MODERATE	43	0	0.023	41	11	0.276	3.7693
Aplan_7298_NR_1000nM_C1_vs_Aplan_7298_NR_Parent	chr11	70520324	70520324	G	C	Gltpd2	c.782G>C	p.Arg261Pro	missense_variant	MODERATE	40	0	0.025	36	12	0.337	4.39418
Aplan_7298_NR_1000nM_C1_vs_Aplan_7298_NR_Parent	chr11	72446973	72446973	C	G	Mybbp1a	c.1820C>G	p.Ser607Cys	missense_variant&splice_region_variant	MODERATE	80	0	0.015	79	17	0.225	5.22898
Aplan_7298_NR_1000nM_C1_vs_Aplan_7298_NR_Parent	chr11	72456678	72456678	C	G	Spns2	c.1100G>C	p.Gly367Ala	missense_variant	MODERATE	26	0	0.035	35	7	0.223	1.77156
Aplan_7298_NR_1000nM_C1_vs_Aplan_7298_NR_Parent	chr11	73110556	73110556	G	C	Itgae	c.212G>C	p.Arg71Pro	missense_variant	MODERATE	94	0	0.013	91	23	0.25	6.24878
Aplan_7298_NR_1000nM_C1_vs_Aplan_7298_NR_Parent	chr11	73112176	73112176	G	C	Itgae	c.565G>C	p.Glu189Gln	missense_variant	MODERATE	18	0	0.059	14	5	0.352	2.00254
Aplan_7298_NR_1000nM_C1_vs_Aplan_7298_NR_Parent	chr11	74660411	74660411	C	G	Cluh	c.1085C>G	p.Ala362Gly	missense_variant	MODERATE	66	1	0.033	46	13	0.287	4.53829
Aplan_7298_NR_1000nM_C1_vs_Aplan_7298_NR_Parent	chr11	75493921	75493921	C	G	Prpf8	c.2289C>G	p.Arg763Arg	synonymous_variant	LOW	62	0	0.018	57	12	0.218	4.12761
Aplan_7298_NR_1000nM_C1_vs_Aplan_7298_NR_Parent	chr11	75510480	75510480	C	G	Rilp	c.262C>G	p.Arg88Gly	missense_variant	MODERATE	20	0	0.046	22	11	0.496	3.69029
Aplan_7298_NR_1000nM_C1_vs_Aplan_7298_NR_Parent	chr11	75515493	75515493	C	T	Scarf1	c.602C>T	p.Ser201Leu	missense_variant	MODERATE	55	0	0.02	53	15	0.285	5.14645
Aplan_7298_NR_1000nM_C1_vs_Aplan_7298_NR_Parent	chr11	75515694	75515694	C	G	Scarf1	c.797+6C>G		splice_region_variant&intron_variant	LOW	18	0	0.05	25	10	0.417	2.62679
Aplan_7298_NR_1000nM_C1_vs_Aplan_7298_NR_Parent	chr11	75570601	75570601	C	G	Slc43a2	c.1378C>G	p.Arg460Gly	missense_variant	MODERATE	125	0	0.009328	97	31	0.3	5.96211
Aplan_7298_NR_1000nM_C1_vs_Aplan_7298_NR_Parent	chr11	77469252	77469252	C	G	Coro6	c.1258C>G	p.Arg420Gly	missense_variant	MODERATE	75	0	0.014	60	21	0.328	6.80768
Aplan_7298_NR_1000nM_C1_vs_Aplan_7298_NR_Parent	chr11	77515734	77515734	C	T	Abhd15	c.536C>T	p.Pro179Leu	missense_variant	MODERATE	33	0	0.031	31	10	0.333	3.53342
Aplan_7298_NR_1000nM_C1_vs_Aplan_7298_NR_Parent	chr11	77515753	77515753	C	G	Abhd15	c.555C>G	p.Arg185Arg	synonymous_variant	LOW	29	0	0.035	27	9	0.357	3.20856
Aplan_7298_NR_1000nM_C1_vs_Aplan_7298_NR_Parent	chr11	77825153	77825153	C	G	Myo18a	c.2700C>G	p.Ser900Ser	synonymous_variant	LOW	58	0	0.02	47	14	0.302	5.42903
Aplan_7298_NR_1000nM_C1_vs_Aplan_7298_NR_Parent	chr11	77977798	77977798	G	C	Sez6	c.2897G>C	p.Arg966Pro	missense_variant	MODERATE	131	0	0.008775	173	49	0.285	5.95832
Aplan_7298_NR_1000nM_C1_vs_Aplan_7298_NR_Parent	chr11	78325186	78325186	C	G	Aldoc	c.517C>G	p.Arg173Gly	missense_variant	MODERATE	67	0	0.015	92	29	0.315	5.83628
Aplan_7298_NR_1000nM_C1_vs_Aplan_7298_NR_Parent	chr11	78337835	78337835	C	G	Pigs	c.866C>G	p.Ala289Gly	missense_variant	MODERATE	174	0	0.007026	146	32	0.228	6.13077
Aplan_7298_NR_1000nM_C1_vs_Aplan_7298_NR_Parent	chr11	79619695	79619695	C	G	Rab11fip4	c.226C>G	p.Arg76Gly	missense_variant	MODERATE	52	0	0.022	50	10	0.232	3.31673
Aplan_7298_NR_1000nM_C1_vs_Aplan_7298_NR_Parent	chr11	83278962	83278962	C	G	Slfn14	c.1855G>C	p.Asp619His	missense_variant	MODERATE	70	0	0.016	67	15	0.227	5.05025
Aplan_7298_NR_1000nM_C1_vs_Aplan_7298_NR_Parent	chr11	83440748	83440748	G	C	1700020L24Rik	c.396G>C	p.Ala132Ala	synonymous_variant	LOW	23	0	0.046	25	7	0.308	2.0062
Aplan_7298_NR_1000nM_C1_vs_Aplan_7298_NR_Parent	chr11	85837098	85837098	C	T	Tbx2	c.856C>T	p.Arg286Trp	missense_variant	MODERATE	116	0	0.011	67	17	0.25	6.45145
Aplan_7298_NR_1000nM_C1_vs_Aplan_7298_NR_Parent	chr11	86611392	86611392	G	C	Vmp1	c.745C>G	p.Gln249Glu	missense_variant	MODERATE	117	1	0.02	157	40	0.26	5.78582
Aplan_7298_NR_1000nM_C1_vs_Aplan_7298_NR_Parent	chr11	87106051	87106051	G	C	Prr11	c.86C>G	p.Pro29Arg	missense_variant	MODERATE	51	0	0.024	57	13	0.229	3.84766
Aplan_7298_NR_1000nM_C1_vs_Aplan_7298_NR_Parent	chr11	87797432	87797432	G	A	Mpo	c.916G>A	p.Ala306Thr	missense_variant	MODERATE	107	0	0.011	71	19	0.276	6.70746
Aplan_7298_NR_1000nM_C1_vs_Aplan_7298_NR_Parent	chr11	89015543	89015543	C	T	Trim25	c.1191C>T	p.Pro397Pro	synonymous_variant	LOW	285	0	0.004197	287	60	0.219	6.03532
Aplan_7298_NR_1000nM_C1_vs_Aplan_7298_NR_Parent	chr11	90035532	90035532	G	C	Tmem100	c.184G>C	p.Val62Leu	missense_variant	MODERATE	63	0	0.017	70	19	0.266	5.83915
Aplan_7298_NR_1000nM_C1_vs_Aplan_7298_NR_Parent	chr11	90674805	90674805	G	C	Tom1l1	c.6C>G	p.Cys2Trp	missense_variant	MODERATE	41	0	0.027	49	12	0.255	3.43688
Aplan_7298_NR_1000nM_C1_vs_Aplan_7298_NR_Parent	chr11	91576221	91576221	G	C	Kif2b	c.1235C>G	p.Thr412Ser	missense_variant	MODERATE	81	0	0.014	86	21	0.25	6.5467
Aplan_7298_NR_1000nM_C1_vs_Aplan_7298_NR_Parent	chr11	94351832	94351832	G	C	Abcc3	c.4065C>G	p.His1355Gln	missense_variant	MODERATE	82	0	0.014	60	12	0.204	4.79366
Aplan_7298_NR_1000nM_C1_vs_Aplan_7298_NR_Parent	chr11	94359362	94359362	G	C	Abcc3	c.2931C>G	p.Ser977Arg	missense_variant	MODERATE	82	0	0.013	88	18	0.226	5.45907
Aplan_7298_NR_1000nM_C1_vs_Aplan_7298_NR_Parent	chr11	94950503	94950503	C	G	Col1a1	c.3711C>G	p.Pro1237Pro	synonymous_variant	LOW	42	0	0.024	56	13	0.231	3.32636
Aplan_7298_NR_1000nM_C1_vs_Aplan_7298_NR_Parent	chr11	95831244	95831244	G	C	Phospho1	c.739G>C	p.Val247Leu	missense_variant	MODERATE	23	0	0.042	26	11	0.418	3.50643
Aplan_7298_NR_1000nM_C1_vs_Aplan_7298_NR_Parent	chr11	95869374	95869374	G	A	B4galnt2	c.826C>T	p.Arg276Cys	missense_variant	MODERATE	39	0	0.027	37	7	0.218	2.32704
Aplan_7298_NR_1000nM_C1_vs_Aplan_7298_NR_Parent	chr11	96287019	96287019	G	C	Hoxb7	c.292G>C	p.Gly98Arg	missense_variant	MODERATE	57	0	0.02	55	15	0.263	5.12028
Aplan_7298_NR_1000nM_C1_vs_Aplan_7298_NR_Parent	chr11	97033132	97033132	G	C	Scrn2	c.841G>C	p.Gly281Arg	missense_variant	MODERATE	75	0	0.015	66	18	0.291	6.55192
Aplan_7298_NR_1000nM_C1_vs_Aplan_7298_NR_Parent	chr11	97114800	97114800	C	T	Tbx21	c.338G>A	p.Arg113His	missense_variant	MODERATE	47	0	0.021	42	9	0.234	3.15397
Aplan_7298_NR_1000nM_C1_vs_Aplan_7298_NR_Parent	chr11	97337955	97337955	C	G	Gpr179	c.3373G>C	p.Glu1125Gln	missense_variant	MODERATE	155	0	0.006853	140	39	0.296	6.30493
Aplan_7298_NR_1000nM_C1_vs_Aplan_7298_NR_Parent	chr11	97454263	97454263	G	T	Arhgap23	c.1224G>T	p.Thr408Thr	synonymous_variant	LOW	67	0	0.017	51	17	0.309	6.97586
Aplan_7298_NR_1000nM_C1_vs_Aplan_7298_NR_Parent	chr11	97676941	97676941	G	C	Mllt6	c.2193G>C	p.Ala731Ala	synonymous_variant	LOW	54	0	0.022	44	11	0.268	4.16463
Aplan_7298_NR_1000nM_C1_vs_Aplan_7298_NR_Parent	chr11	97932256	97932256	G	C	Plxdc1	c.1158C>G	p.Gly386Gly	synonymous_variant	LOW	30	0	0.035	40	9	0.246	2.09558
Aplan_7298_NR_1000nM_C1_vs_Aplan_7298_NR_Parent	chr11	98009391	98009391	G	A	Cacnb1	c.1075C>T	p.Arg359Trp	missense_variant	MODERATE	24	0	0.043	34	10	0.295	2.46819
Aplan_7298_NR_1000nM_C1_vs_Aplan_7298_NR_Parent	chr11	98702941	98702941	C	G	Csf3	c.608C>G	p.Ala203Gly	missense_variant	MODERATE	60	0	0.017	81	20	0.233	5.08853
Aplan_7298_NR_1000nM_C1_vs_Aplan_7298_NR_Parent	chr11	98771288	98771288	G	C	Nr1d1	c.519C>G	p.Asn173Lys	missense_variant	MODERATE	50	0	0.021	59	15	0.269	4.38189
Aplan_7298_NR_1000nM_C1_vs_Aplan_7298_NR_Parent	chr11	99014712	99014712	G	C	Top2a	c.1038C>G	p.Gly346Gly	synonymous_variant	LOW	257	0	0.004417	315	99	0.296	5.63247
Aplan_7298_NR_1000nM_C1_vs_Aplan_7298_NR_Parent	chr11	99238635	99238635	G	A	Krt222	c.345C>T	p.Ile115Ile	synonymous_variant	LOW	73	0	0.017	57	12	0.22	4.6101
Aplan_7298_NR_1000nM_C1_vs_Aplan_7298_NR_Parent	chr11	99837790	99837790	C	G	2300003K06Rik	c.226G>C	p.Gly76Arg	missense_variant	MODERATE	86	0	0.012	72	19	0.285	7.12889
Aplan_7298_NR_1000nM_C1_vs_Aplan_7298_NR_Parent	chr11	100354014	100354014	C	T	Hap1	c.704G>A	p.Arg235Gln	missense_variant	MODERATE	91	0	0.012	97	20	0.211	6.1136
Aplan_7298_NR_1000nM_C1_vs_Aplan_7298_NR_Parent	chr11	100551551	100551551	G	C	Ttc25	c.534G>C	p.Ser178Ser	synonymous_variant	LOW	80	0	0.015	64	14	0.238	5.31328
Aplan_7298_NR_1000nM_C1_vs_Aplan_7298_NR_Parent	chr11	100576398	100576398	C	T	Cnp	c.166C>T	p.Arg56Cys	missense_variant	MODERATE	52	0	0.02	62	16	0.289	4.36106
Aplan_7298_NR_1000nM_C1_vs_Aplan_7298_NR_Parent	chr11	100708563	100708563	G	C	Kat2a	c.1600C>G	p.Arg534Gly	missense_variant	MODERATE	71	0	0.016	38	11	0.291	5.50362
Aplan_7298_NR_1000nM_C1_vs_Aplan_7298_NR_Parent	chr11	100958958	100958958	C	G	Ptrf	c.845G>C	p.Arg282Pro	missense_variant	MODERATE	143	0	0.008301	102	23	0.227	6.53501
Aplan_7298_NR_1000nM_C1_vs_Aplan_7298_NR_Parent	chr11	100959106	100959106	C	G	Ptrf	c.697G>C	p.Asp233His	missense_variant	MODERATE	102	0	0.01	99	31	0.319	6.06544
Aplan_7298_NR_1000nM_C1_vs_Aplan_7298_NR_Parent	chr11	100959116	100959116	C	G	Ptrf	c.687G>C	p.Arg229Arg	synonymous_variant	LOW	105	0	0.009717	97	30	0.312	6.32273
Aplan_7298_NR_1000nM_C1_vs_Aplan_7298_NR_Parent	chr11	101020522	101020522	C	T	Atp6v0a1	c.246C>T	p.Thr82Thr	synonymous_variant	LOW	35	0	0.031	35	10	0.306	3.03361
Aplan_7298_NR_1000nM_C1_vs_Aplan_7298_NR_Parent	chr11	101039889	101039889	C	G	Atp6v0a1	c.1562C>G	p.Pro521Arg	missense_variant	MODERATE	80	0	0.015	90	20	0.241	5.98124
Aplan_7298_NR_1000nM_C1_vs_Aplan_7298_NR_Parent	chr11	101126098	101126098	C	G	Tubg1	c.1225C>G	p.Arg409Gly	missense_variant	MODERATE	58	0	0.02	41	13	0.281	5.54541
Aplan_7298_NR_1000nM_C1_vs_Aplan_7298_NR_Parent	chr11	101279471	101279471	C	G	Cntd1	c.166C>G	p.Arg56Gly	missense_variant	MODERATE	67	1	0.019	65	18	0.259	5.04647
Aplan_7298_NR_1000nM_C1_vs_Aplan_7298_NR_Parent	chr11	101491899	101491899	G	C	Brca1	c.5253C>G	p.Ile1751Met	missense_variant	MODERATE	46	0	0.024	52	16	0.304	4.92155
Aplan_7298_NR_1000nM_C1_vs_Aplan_7298_NR_Parent	chr11	101770582	101770582	G	C	Etv4	c.1245C>G	p.Gly415Gly	synonymous_variant	LOW	14	0	0.071	17	5	0.293	1.31694
Aplan_7298_NR_1000nM_C1_vs_Aplan_7298_NR_Parent	chr11	102148100	102148100	C	G	Nags	c.1256C>G	p.Ala419Gly	missense_variant	MODERATE	90	1	0.013	80	17	0.215	4.81356
Aplan_7298_NR_1000nM_C1_vs_Aplan_7298_NR_Parent	chr11	102393757	102393757	C	G	Rundc3a	c.82C>G	p.Arg28Gly	missense_variant	MODERATE	49	0	0.024	36	9	0.278	3.64083
Aplan_7298_NR_1000nM_C1_vs_Aplan_7298_NR_Parent	chr11	102399917	102399917	C	G	Rundc3a	c.825C>G	p.Arg275Arg	synonymous_variant	LOW	33	0	0.029	21	8	0.406	3.70868
Aplan_7298_NR_1000nM_C1_vs_Aplan_7298_NR_Parent	chr11	102403423	102403423	G	C	Slc25a39	c.1077C>G	p.Arg359Arg	synonymous_variant	LOW	53	0	0.02	39	8	0.221	3.17982
Aplan_7298_NR_1000nM_C1_vs_Aplan_7298_NR_Parent	chr11	102467326	102467326	C	G	Itga2b	c.571+1G>C		splice_donor_variant&intron_variant	HIGH	59	0	0.018	61	24	0.385	6.53449
Aplan_7298_NR_1000nM_C1_vs_Aplan_7298_NR_Parent	chr11	103076787	103076787	C	G	Plcd3	c.1328G>C	p.Arg443Pro	missense_variant	MODERATE	49	0	0.024	34	10	0.296	4.26833
Aplan_7298_NR_1000nM_C1_vs_Aplan_7298_NR_Parent	chr11	103077575	103077575	C	G	Plcd3	c.1155G>C	p.Pro385Pro	synonymous_variant	LOW	70	0	0.017	33	8	0.299	4.23362
Aplan_7298_NR_1000nM_C1_vs_Aplan_7298_NR_Parent	chr11	103138192	103138192	C	G	Hexim2	c.69C>G	p.Ser23Ser	synonymous_variant	LOW	68	0	0.018	58	12	0.221	4.3391
Aplan_7298_NR_1000nM_C1_vs_Aplan_7298_NR_Parent	chr11	106437098	106437098	G	C	Ern1	c.207C>G	p.His69Gln	missense_variant	MODERATE	63	0	0.018	50	15	0.32	5.90533
Aplan_7298_NR_1000nM_C1_vs_Aplan_7298_NR_Parent	chr11	106761206	106761206	C	G	Milr1	c.442C>G	p.Arg148Gly	missense_variant	MODERATE	57	0	0.02	62	11	0.222	3.18236
Aplan_7298_NR_1000nM_C1_vs_Aplan_7298_NR_Parent	chr11	107029643	107029643	G	C	1810010H24Rik	c.207G>C	p.Ala69Ala	synonymous_variant	LOW	36	0	0.029	40	9	0.231	2.58836
Aplan_7298_NR_1000nM_C1_vs_Aplan_7298_NR_Parent	chr11	110070390	110070390	C	A	Abca8a	c.1702G>T	p.Asp568Tyr	missense_variant	MODERATE	54	0	0.021	48	17	0.353	6.35424
Aplan_7298_NR_1000nM_C1_vs_Aplan_7298_NR_Parent	chr11	114778400	114778400	G	C	Kif19a	c.167G>C	p.Arg56Pro	missense_variant	MODERATE	63	0	0.019	46	12	0.285	4.90598
Aplan_7298_NR_1000nM_C1_vs_Aplan_7298_NR_Parent	chr11	114897793	114897793	G	C	Cd300a	c.620G>C	p.Arg207Thr	missense_variant	MODERATE	142	0	0.008119	118	28	0.218	6.10892
Aplan_7298_NR_1000nM_C1_vs_Aplan_7298_NR_Parent	chr11	115205131	115205131	C	G	Tmem104	c.497C>G	p.Ala166Gly	missense_variant	MODERATE	61	0	0.019	60	28	0.452	6.01306
Aplan_7298_NR_1000nM_C1_vs_Aplan_7298_NR_Parent	chr11	115250660	115250660	C	G	Grin2c	c.2631G>C	p.Ala877Ala	synonymous_variant	LOW	38	0	0.03	37	10	0.273	3.37653
Aplan_7298_NR_1000nM_C1_vs_Aplan_7298_NR_Parent	chr11	115256166	115256166	C	G	Grin2c	c.1202G>C	p.Arg401Pro	missense_variant	MODERATE	32	0	0.037	30	6	0.249	2.01507
Aplan_7298_NR_1000nM_C1_vs_Aplan_7298_NR_Parent	chr11	115258139	115258139	C	T	Grin2c	c.632G>A	p.Arg211His	missense_variant	MODERATE	31	0	0.03	33	9	0.273	2.67113
Aplan_7298_NR_1000nM_C1_vs_Aplan_7298_NR_Parent	chr11	115258141	115258141	C	G	Grin2c	c.630G>C	p.Ala210Ala	synonymous_variant	LOW	31	0	0.031	33	9	0.273	2.67113
Aplan_7298_NR_1000nM_C1_vs_Aplan_7298_NR_Parent	chr11	115318933	115318933	C	G	Ush1g	c.434G>C	p.Arg145Pro	missense_variant	MODERATE	58	0	0.017	61	17	0.294	5.3463
Aplan_7298_NR_1000nM_C1_vs_Aplan_7298_NR_Parent	chr11	115329194	115329194	C	G	Otop2	c.859C>G	p.Arg287Gly	missense_variant	MODERATE	105	0	0.011	74	21	0.275	5.98053
Aplan_7298_NR_1000nM_C1_vs_Aplan_7298_NR_Parent	chr11	115339674	115339674	C	G	Otop3	c.376C>G	p.Arg126Gly	missense_variant	MODERATE	58	0	0.017	84	20	0.231	4.95702
Aplan_7298_NR_1000nM_C1_vs_Aplan_7298_NR_Parent	chr11	115344906	115344906	C	G	Otop3	c.1420C>G	p.Arg474Gly	missense_variant	MODERATE	55	0	0.02	51	12	0.255	4.14186
Aplan_7298_NR_1000nM_C1_vs_Aplan_7298_NR_Parent	chr11	115445498	115445498	G	C	Trim80	c.1046G>C	p.Trp349Ser	missense_variant	MODERATE	20	0	0.052	23	6	0.26	1.63986
Aplan_7298_NR_1000nM_C1_vs_Aplan_7298_NR_Parent	chr11	115608550	115608550	G	C	Mif4gd	c.505C>G	p.Arg169Gly	missense_variant	MODERATE	23	0	0.043	22	6	0.274	2.03808
Aplan_7298_NR_1000nM_C1_vs_Aplan_7298_NR_Parent	chr11	115800704	115800704	G	C	Caskin2	c.3254C>G	p.Pro1085Arg	missense_variant	MODERATE	65	0	0.015	54	12	0.244	4.4419
Aplan_7298_NR_1000nM_C1_vs_Aplan_7298_NR_Parent	chr11	115801575	115801575	G	C	Caskin2	c.2383C>G	p.Arg795Gly	missense_variant	MODERATE	40	0	0.025	43	9	0.209	2.59388
Aplan_7298_NR_1000nM_C1_vs_Aplan_7298_NR_Parent	chr11	115820433	115820433	G	C	Tsen54	c.675G>C	p.Leu225Leu	synonymous_variant	LOW	65	0	0.016	52	16	0.339	6.28835
Aplan_7298_NR_1000nM_C1_vs_Aplan_7298_NR_Parent	chr11	115853787	115853787	G	C	Llgl2	c.2609G>C	p.Arg870Pro	missense_variant	MODERATE	61	0	0.018	44	9	0.227	3.62725
Aplan_7298_NR_1000nM_C1_vs_Aplan_7298_NR_Parent	chr11	115988950	115988950	G	C	Itgb4	c.1927G>C	p.Gly643Arg	missense_variant	MODERATE	66	0	0.017	50	12	0.246	4.75325
Aplan_7298_NR_1000nM_C1_vs_Aplan_7298_NR_Parent	chr11	116108338	116108338	G	C	Trim47	c.711C>G	p.Ser237Arg	missense_variant	MODERATE	43	0	0.028	43	8	0.2	2.26235
Aplan_7298_NR_1000nM_C1_vs_Aplan_7298_NR_Parent	chr11	116135215	116135215	C	G	Mrpl38	c.358G>C	p.Glu120Gln	missense_variant	MODERATE	111	0	0.011	103	23	0.231	6.33068
Aplan_7298_NR_1000nM_C1_vs_Aplan_7298_NR_Parent	chr11	116216404	116216404	C	G	Cdk3-ps	n.118-7C>G		splice_region_variant&intron_variant	LOW	44	0	0.024	49	14	0.313	4.27346
Aplan_7298_NR_1000nM_C1_vs_Aplan_7298_NR_Parent	chr11	116220811	116220811	C	G	Evpl	c.6052G>C	p.Gly2018Arg	missense_variant	MODERATE	69	0	0.017	48	15	0.347	6.46064
Aplan_7298_NR_1000nM_C1_vs_Aplan_7298_NR_Parent	chr11	116221447	116221447	C	G	Evpl	c.5416G>C	p.Gly1806Arg	missense_variant	MODERATE	88	0	0.012	91	20	0.236	6.20959
Aplan_7298_NR_1000nM_C1_vs_Aplan_7298_NR_Parent	chr11	116221482	116221482	C	G	Evpl	c.5381G>C	p.Gly1794Ala	missense_variant	MODERATE	102	0	0.012	95	21	0.236	6.40925
Aplan_7298_NR_1000nM_C1_vs_Aplan_7298_NR_Parent	chr11	116221638	116221638	C	G	Evpl	c.5225G>C	p.Arg1742Pro	missense_variant	MODERATE	92	0	0.011	86	26	0.307	6.20042
Aplan_7298_NR_1000nM_C1_vs_Aplan_7298_NR_Parent	chr11	116222965	116222965	C	G	Evpl	c.3898G>C	p.Asp1300His	missense_variant	MODERATE	139	0	0.007957	132	29	0.242	6.22971
Aplan_7298_NR_1000nM_C1_vs_Aplan_7298_NR_Parent	chr11	116223422	116223422	C	G	Evpl	c.3441G>C	p.Pro1147Pro	synonymous_variant	LOW	108	0	0.01	113	31	0.269	5.93887
Aplan_7298_NR_1000nM_C1_vs_Aplan_7298_NR_Parent	chr11	116225146	116225146	C	G	Evpl	c.2583G>C	p.Ala861Ala	synonymous_variant	LOW	89	0	0.012	81	23	0.264	6.55022
Aplan_7298_NR_1000nM_C1_vs_Aplan_7298_NR_Parent	chr11	116282977	116282977	C	G	Galr2	c.432C>G	p.Ala144Ala	synonymous_variant	LOW	83	0	0.013	53	17	0.332	6.1642
Aplan_7298_NR_1000nM_C1_vs_Aplan_7298_NR_Parent	chr11	116304889	116304889	C	T	Exoc7	c.286G>A	p.Asp96Asn	missense_variant	MODERATE	53	0	0.02	54	12	0.243	3.60906
Aplan_7298_NR_1000nM_C1_vs_Aplan_7298_NR_Parent	chr11	116332231	116332231	G	C	Foxj1	c.745C>G	p.Gln249Glu	missense_variant	MODERATE	45	0	0.022	31	9	0.284	3.84922
Aplan_7298_NR_1000nM_C1_vs_Aplan_7298_NR_Parent	chr11	116438239	116438239	G	C	Ubald2	c.429G>C	p.Trp143Cys	missense_variant	MODERATE	43	0	0.028	46	15	0.326	4.75995
Aplan_7298_NR_1000nM_C1_vs_Aplan_7298_NR_Parent	chr11	116539499	116539499	G	C	Ube2o	c.3412C>G	p.Arg1138Gly	missense_variant	MODERATE	88	0	0.013	89	25	0.276	6.53021
Aplan_7298_NR_1000nM_C1_vs_Aplan_7298_NR_Parent	chr11	117869735	117869735	G	C	Tha1	c.662C>G	p.Ala221Gly	missense_variant	MODERATE	48	0	0.023	32	6	0.2	2.52062
Aplan_7298_NR_1000nM_C1_vs_Aplan_7298_NR_Parent	chr11	118094136	118094136	G	C	Dnah17	c.4740C>G	p.Ala1580Ala	synonymous_variant	LOW	53	0	0.021	53	13	0.256	3.97573
Aplan_7298_NR_1000nM_C1_vs_Aplan_7298_NR_Parent	chr11	118112572	118112572	G	C	Dnah17	c.2448C>G	p.Asp816Glu	missense_variant	MODERATE	61	0	0.019	63	16	0.237	4.97988
Aplan_7298_NR_1000nM_C1_vs_Aplan_7298_NR_Parent	chr11	118396691	118396691	G	C	Lgals3bp	c.529C>G	p.Arg177Gly	missense_variant	MODERATE	62	0	0.017	67	17	0.254	5.23628
Aplan_7298_NR_1000nM_C1_vs_Aplan_7298_NR_Parent	chr11	118411028	118411028	C	G	Cant1	c.462G>C	p.Gly154Gly	synonymous_variant	LOW	67	0	0.017	69	22	0.308	6.11544
Aplan_7298_NR_1000nM_C1_vs_Aplan_7298_NR_Parent	chr11	119023254	119023254	G	C	Cbx2	c.73-4G>C		splice_region_variant&intron_variant	LOW	34	0	0.032	11	5	0.364	3.42234
Aplan_7298_NR_1000nM_C1_vs_Aplan_7298_NR_Parent	chr11	119156073	119156073	G	C	Tbc1d16	c.1350C>G	p.Arg450Arg	synonymous_variant	LOW	138	0	0.008414	107	28	0.278	6.03796
Aplan_7298_NR_1000nM_C1_vs_Aplan_7298_NR_Parent	chr11	119297859	119297859	G	C	Eif4a3	c.188C>G	p.Ala63Gly	missense_variant	MODERATE	62	0	0.018	85	19	0.257	4.71752
Aplan_7298_NR_1000nM_C1_vs_Aplan_7298_NR_Parent	chr11	119346801	119346801	G	C	Sgsh	c.986C>G	p.Pro329Arg	missense_variant	MODERATE	54	0	0.02	43	15	0.371	6.00911
Aplan_7298_NR_1000nM_C1_vs_Aplan_7298_NR_Parent	chr11	119377713	119377713	G	A	Slc26a11	c.1491G>A	p.Ala497Ala	synonymous_variant	LOW	28	0	0.042	31	10	0.357	3.03867
Aplan_7298_NR_1000nM_C1_vs_Aplan_7298_NR_Parent	chr11	119546852	119546852	C	G	Nptx1	c.452G>C	p.Ser151Thr	missense_variant	MODERATE	72	0	0.014	53	16	0.307	6.62306
Aplan_7298_NR_1000nM_C1_vs_Aplan_7298_NR_Parent	chr11	119547440	119547440	G	C	Nptx1	c.150C>G	p.Gly50Gly	synonymous_variant	LOW	36	0	0.03	24	5	0.254	2.10888
Aplan_7298_NR_1000nM_C1_vs_Aplan_7298_NR_Parent	chr11	120011882	120011882	C	G	Aatk	c.1687G>C	p.Gly563Arg	missense_variant	MODERATE	47	0	0.023	41	13	0.317	4.8334
Aplan_7298_NR_1000nM_C1_vs_Aplan_7298_NR_Parent	chr11	120073818	120073818	G	C	Cep131	c.811C>G	p.Arg271Gly	missense_variant	MODERATE	42	0	0.025	46	9	0.205	2.56724
Aplan_7298_NR_1000nM_C1_vs_Aplan_7298_NR_Parent	chr11	120287711	120287711	C	G	Bahcc1	c.7095C>G	p.Ser2365Ser	synonymous_variant	LOW	119	0	0.009706	105	27	0.286	6.40609
Aplan_7298_NR_1000nM_C1_vs_Aplan_7298_NR_Parent	chr11	120361768	120361768	C	G	Fscn2	c.60C>G	p.Ala20Ala	synonymous_variant	LOW	40	0	0.024	36	10	0.286	3.57464
Aplan_7298_NR_1000nM_C1_vs_Aplan_7298_NR_Parent	chr11	120362296	120362296	C	G	Fscn2	c.588C>G	p.Ser196Arg	missense_variant	MODERATE	37	0	0.026	48	13	0.28	3.41306
Aplan_7298_NR_1000nM_C1_vs_Aplan_7298_NR_Parent	chr11	120498084	120498084	C	G	Slc25a10	c.773C>G	p.Ala258Gly	missense_variant	MODERATE	168	0	0.006872	159	30	0.2	5.9591
Aplan_7298_NR_1000nM_C1_vs_Aplan_7298_NR_Parent	chr11	120536701	120536701	C	G	Gcgr	c.548C>G	p.Ala183Gly	missense_variant	MODERATE	102	0	0.01	85	22	0.265	6.15368
Aplan_7298_NR_1000nM_C1_vs_Aplan_7298_NR_Parent	chr11	120536904	120536904	G	C	Gcgr	c.670G>C	p.Gly224Arg	missense_variant	MODERATE	73	0	0.014	45	14	0.332	6.49508
Aplan_7298_NR_1000nM_C1_vs_Aplan_7298_NR_Parent	chr11	120629565	120629565	C	G	Mafg	c.208G>C	p.Val70Leu	missense_variant	MODERATE	67	0	0.016	49	9	0.204	3.56946
Aplan_7298_NR_1000nM_C1_vs_Aplan_7298_NR_Parent	chr11	120641197	120641197	C	T	Pycr1	c.742G>A	p.Gly248Arg	missense_variant	MODERATE	30	0	0.034	43	10	0.219	2.38464
Aplan_7298_NR_1000nM_C1_vs_Aplan_7298_NR_Parent	chr11	120641237	120641237	C	G	Pycr1	c.702G>C	p.Pro234Pro	synonymous_variant	LOW	44	0	0.023	49	20	0.391	6.03086
Aplan_7298_NR_1000nM_C1_vs_Aplan_7298_NR_Parent	chr11	120688986	120688986	C	T	Aspscr1	c.581C>T	p.Pro194Leu	missense_variant	MODERATE	17	0	0.056	26	7	0.307	1.50861
Aplan_7298_NR_1000nM_C1_vs_Aplan_7298_NR_Parent	chr11	120729811	120729811	C	G	Cbr2	c.646G>C	p.Val216Leu	missense_variant	MODERATE	36	0	0.031	28	9	0.357	3.60069
Aplan_7298_NR_1000nM_C1_vs_Aplan_7298_NR_Parent	chr11	121514043	121514043	C	G	Zfp750	c.5G>C	p.Ser2Thr	missense_variant	MODERATE	63	0	0.017	68	18	0.272	5.58769
Aplan_7298_NR_1000nM_C1_vs_Aplan_7298_NR_Parent	chr12	4134473	4134473	C	G	Adcy3	c.148C>G	p.Pro50Ala	missense_variant	MODERATE	50	0	0.021	49	12	0.25	4.00082
Aplan_7298_NR_1000nM_C1_vs_Aplan_7298_NR_Parent	chr12	4236446	4236446	G	A	Ptrhd1	c.336G>A	p.Pro112Pro	synonymous_variant	LOW	51	0	0.023	43	12	0.317	4.49322
Aplan_7298_NR_1000nM_C1_vs_Aplan_7298_NR_Parent	chr12	11276317	11276317	C	G	Smc6	c.314C>G	p.Ala105Gly	missense_variant	MODERATE	40	0	0.03	50	13	0.293	3.40535
Aplan_7298_NR_1000nM_C1_vs_Aplan_7298_NR_Parent	chr12	12939635	12939635	G	C	Mycn	c.759C>G	p.Ser253Ser	synonymous_variant	LOW	56	0	0.022	44	8	0.205	3.02117
Aplan_7298_NR_1000nM_C1_vs_Aplan_7298_NR_Parent	chr12	12939804	12939804	G	C	Mycn	c.590C>G	p.Pro197Arg	missense_variant	MODERATE	41	0	0.027	38	9	0.249	3.10125
Aplan_7298_NR_1000nM_C1_vs_Aplan_7298_NR_Parent	chr12	24951414	24951414	C	G	Mboat2	c.909C>G	p.Phe303Leu	missense_variant	MODERATE	39	0	0.028	69	17	0.226	3.60648
Aplan_7298_NR_1000nM_C1_vs_Aplan_7298_NR_Parent	chr12	35107562	35107562	G	T	Snx13	c.1600+6G>T		splice_region_variant&intron_variant	LOW	42	1	0.052	42	17	0.36	4.6338
Aplan_7298_NR_1000nM_C1_vs_Aplan_7298_NR_Parent	chr12	40124567	40124567	G	C	Scin	c.516C>G	p.Thr172Thr	splice_region_variant&synonymous_variant	LOW	80	0	0.014	106	25	0.242	5.975
Aplan_7298_NR_1000nM_C1_vs_Aplan_7298_NR_Parent	chr12	56533690	56533690	G	C	Nkx2-1	c.464C>G	p.Pro155Arg	missense_variant	MODERATE	34	0	0.032	31	8	0.266	2.80606
Aplan_7298_NR_1000nM_C1_vs_Aplan_7298_NR_Parent	chr12	57576335	57576335	C	G	Ttc6	c.519C>G	p.Arg173Arg	synonymous_variant	LOW	48	0	0.021	67	22	0.304	5.86108
Aplan_7298_NR_1000nM_C1_vs_Aplan_7298_NR_Parent	chr12	69845742	69845742	C	G	Map4k5	c.613G>C	p.Gly205Arg	missense_variant	MODERATE	118	0	0.011	101	24	0.238	6.77459
Aplan_7298_NR_1000nM_C1_vs_Aplan_7298_NR_Parent	chr12	73546216	73546216	C	G	Tmem30b	c.124G>C	p.Ala42Pro	missense_variant	MODERATE	15	0	0.067	17	7	0.393	2.11408
Aplan_7298_NR_1000nM_C1_vs_Aplan_7298_NR_Parent	chr12	73721803	73721803	G	C	Prkch	c.1346G>C	p.Arg449Pro	missense_variant	MODERATE	83	0	0.013	63	14	0.25	5.50837
Aplan_7298_NR_1000nM_C1_vs_Aplan_7298_NR_Parent	chr12	76094299	76094299	G	A	Syne2	c.18181G>A	p.Glu6061Lys	missense_variant	MODERATE	31	0	0.033	24	7	0.324	2.76813
Aplan_7298_NR_1000nM_C1_vs_Aplan_7298_NR_Parent	chr12	76405508	76405508	C	G	Hspa2	c.975C>G	p.Arg325Arg	synonymous_variant	LOW	39	0	0.029	26	8	0.333	3.50931
Aplan_7298_NR_1000nM_C1_vs_Aplan_7298_NR_Parent	chr12	79066633	79066633	C	G	Plekhh1	c.1834C>G	p.Arg612Gly	missense_variant	MODERATE	52	0	0.024	71	22	0.278	5.8632
Aplan_7298_NR_1000nM_C1_vs_Aplan_7298_NR_Parent	chr12	79286267	79286267	G	C	Zfyve26	c.929C>G	p.Ala310Gly	missense_variant	MODERATE	50	0	0.024	50	15	0.295	4.75033
Aplan_7298_NR_1000nM_C1_vs_Aplan_7298_NR_Parent	chr12	80436297	80436297	C	G	Dcaf5	c.102G>C	p.Gln34His	missense_variant	MODERATE	42	0	0.027	31	11	0.37	4.62353
Aplan_7298_NR_1000nM_C1_vs_Aplan_7298_NR_Parent	chr12	80720676	80720676	G	C	Plekhd1	c.837G>C	p.Pro279Pro	synonymous_variant	LOW	45	0	0.026	43	10	0.232	3.37183
Aplan_7298_NR_1000nM_C1_vs_Aplan_7298_NR_Parent	chr12	81104675	81104675	C	T	Smoc1	c.165C>T	p.Cys55Cys	synonymous_variant	LOW	80	0	0.014	84	18	0.23	5.52444
Aplan_7298_NR_1000nM_C1_vs_Aplan_7298_NR_Parent	chr12	83594702	83594702	C	G	Zfyve1	c.179G>C	p.Arg60Pro	missense_variant	MODERATE	84	0	0.013	96	23	0.247	6.57007
Aplan_7298_NR_1000nM_C1_vs_Aplan_7298_NR_Parent	chr12	83772203	83772203	C	G	Papln	c.316C>G	p.Arg106Gly	missense_variant	MODERATE	53	0	0.021	48	12	0.233	4.23326
Aplan_7298_NR_1000nM_C1_vs_Aplan_7298_NR_Parent	chr12	84053577	84053577	C	G	Acot3	c.126C>G	p.Pro42Pro	synonymous_variant	LOW	37	0	0.028	34	6	0.205	2.02731
Aplan_7298_NR_1000nM_C1_vs_Aplan_7298_NR_Parent	chr12	84053917	84053917	C	G	Acot3	c.466C>G	p.Arg156Gly	missense_variant	MODERATE	38	0	0.027	34	10	0.287	3.61164
Aplan_7298_NR_1000nM_C1_vs_Aplan_7298_NR_Parent	chr12	84075674	84075674	C	G	Acot5	c.1031C>G	p.Ala344Gly	missense_variant	MODERATE	93	0	0.011	92	27	0.318	5.9433
Aplan_7298_NR_1000nM_C1_vs_Aplan_7298_NR_Parent	chr12	84147433	84147433	G	C	Pnma1	c.495C>G	p.Ser165Ser	synonymous_variant	LOW	77	0	0.014	94	20	0.219	5.50622
Aplan_7298_NR_1000nM_C1_vs_Aplan_7298_NR_Parent	chr12	84147518	84147518	G	C	Pnma1	c.410C>G	p.Pro137Arg	missense_variant	MODERATE	57	0	0.018	58	19	0.294	6.18484
Aplan_7298_NR_1000nM_C1_vs_Aplan_7298_NR_Parent	chr12	84162534	84162534	G	C	Elmsan1	c.1793C>G	p.Pro598Arg	missense_variant	MODERATE	68	0	0.017	53	14	0.294	5.49817
Aplan_7298_NR_1000nM_C1_vs_Aplan_7298_NR_Parent	chr12	85268501	85268501	C	G	Mlh3	c.910G>C	p.Gly304Arg	missense_variant	MODERATE	83	0	0.013	108	23	0.225	5.93172
Aplan_7298_NR_1000nM_C1_vs_Aplan_7298_NR_Parent	chr12	85268527	85268527	C	G	Mlh3	c.884G>C	p.Arg295Pro	missense_variant	MODERATE	84	0	0.013	95	21	0.233	5.8503
Aplan_7298_NR_1000nM_C1_vs_Aplan_7298_NR_Parent	chr12	85314429	85314429	C	G	Nek9	c.1501G>C	p.Val501Leu	missense_variant	MODERATE	134	0	0.008852	158	40	0.263	6.20519
Aplan_7298_NR_1000nM_C1_vs_Aplan_7298_NR_Parent	chr12	87075648	87075648	C	T	Tmem63c	c.1219C>T	p.Arg407Cys	missense_variant	MODERATE	253	0	0.004755	205	61	0.302	5.84035
Aplan_7298_NR_1000nM_C1_vs_Aplan_7298_NR_Parent	chr12	91325610	91325610	G	C	Cep128	c.664C>G	p.Arg222Gly	missense_variant	MODERATE	44	0	0.025	38	9	0.275	3.25473
Aplan_7298_NR_1000nM_C1_vs_Aplan_7298_NR_Parent	chr12	98679410	98679410	G	T	Ptpn21	c.3268C>A	p.Arg1090Arg	synonymous_variant	LOW	75	0	0.015	60	13	0.228	4.92778
Aplan_7298_NR_1000nM_C1_vs_Aplan_7298_NR_Parent	chr12	100558520	100558520	C	A	Rps6ka5	c.1957G>T	p.Ala653Ser	missense_variant	MODERATE	55	0	0.021	39	10	0.27	4.15295
Aplan_7298_NR_1000nM_C1_vs_Aplan_7298_NR_Parent	chr12	100878960	100878960	G	C	Gpr68	c.324C>G	p.Ser108Arg	missense_variant	MODERATE	38	0	0.026	47	11	0.266	3.05911
Aplan_7298_NR_1000nM_C1_vs_Aplan_7298_NR_Parent	chr12	103001888	103001888	G	C	Unc79	c.531G>C	p.Thr177Thr	synonymous_variant	LOW	145	0	0.008366	192	57	0.293	6.17855
Aplan_7298_NR_1000nM_C1_vs_Aplan_7298_NR_Parent	chr12	103183527	103183527	C	T	Unc79	c.7705C>T	p.Arg2569Trp	missense_variant	MODERATE	33	0	0.031	35	9	0.272	2.65455
Aplan_7298_NR_1000nM_C1_vs_Aplan_7298_NR_Parent	chr12	104781399	104781399	C	T	Clmn	c.1888G>A	p.Glu630Lys	missense_variant	MODERATE	99	0	0.011	118	28	0.241	6.21753
Aplan_7298_NR_1000nM_C1_vs_Aplan_7298_NR_Parent	chr12	107915819	107915819	G	C	Bcl11b	c.2236C>G	p.Pro746Ala	missense_variant	MODERATE	29	0	0.033	34	7	0.235	1.90155
Aplan_7298_NR_1000nM_C1_vs_Aplan_7298_NR_Parent	chr12	110666673	110666673	C	G	Dync1h1	c.13917C>G	p.Ala4639Ala	synonymous_variant	LOW	54	0	0.021	52	14	0.275	4.7764
Aplan_7298_NR_1000nM_C1_vs_Aplan_7298_NR_Parent	chr12	110693821	110693821	C	G	Hsp90aa1	c.1040G>C	p.Arg347Pro	missense_variant	MODERATE	141	0	0.008089	147	29	0.201	6.22841
Aplan_7298_NR_1000nM_C1_vs_Aplan_7298_NR_Parent	chr12	110855605	110855605	C	G	Zfp839	c.852C>G	p.Asp284Glu	missense_variant	MODERATE	123	0	0.009224	99	26	0.269	6.8398
Aplan_7298_NR_1000nM_C1_vs_Aplan_7298_NR_Parent	chr12	110860798	110860798	C	G	Zfp839	c.1122C>G	p.Ser374Arg	missense_variant&splice_region_variant	MODERATE	34	0	0.028	48	15	0.32	3.65444
Aplan_7298_NR_1000nM_C1_vs_Aplan_7298_NR_Parent	chr12	111274782	111274782	G	C	Amn	c.585G>C	p.Ser195Ser	synonymous_variant	LOW	46	0	0.022	33	7	0.243	2.83158
Aplan_7298_NR_1000nM_C1_vs_Aplan_7298_NR_Parent	chr12	111274816	111274816	G	C	Amn	c.619G>C	p.Asp207His	missense_variant	MODERATE	48	0	0.02	33	9	0.28	3.83024
Aplan_7298_NR_1000nM_C1_vs_Aplan_7298_NR_Parent	chr12	111275444	111275444	G	C	Amn	c.943G>C	p.Ala315Pro	missense_variant	MODERATE	14	0	0.061	28	6	0.24	1.08052
Aplan_7298_NR_1000nM_C1_vs_Aplan_7298_NR_Parent	chr12	111430670	111430670	C	G	Exoc3l4	c.1984C>G	p.Arg662Gly	missense_variant&splice_region_variant	MODERATE	37	0	0.029	27	11	0.375	4.75613
Aplan_7298_NR_1000nM_C1_vs_Aplan_7298_NR_Parent	chr13	9637266	9637266	G	C	Dip2c	c.3924+1G>C		splice_donor_variant&intron_variant	HIGH	47	0	0.022	66	14	0.234	3.49841
Aplan_7298_NR_1000nM_C1_vs_Aplan_7298_NR_Parent	chr13	11587331	11587331	G	C	Ryr2	c.13664C>G	p.Ala4555Gly	missense_variant	MODERATE	47	0	0.025	33	5	0.2	2.00557
Aplan_7298_NR_1000nM_C1_vs_Aplan_7298_NR_Parent	chr13	14126506	14126506	G	C	Arid4b	c.173G>C	p.Gly58Ala	missense_variant	MODERATE	75	0	0.016	94	21	0.217	5.77108
Aplan_7298_NR_1000nM_C1_vs_Aplan_7298_NR_Parent	chr13	30947465	30947465	C	G	Hus1b	c.210G>C	p.Ser70Ser	synonymous_variant	LOW	60	0	0.017	60	17	0.279	5.38957
Aplan_7298_NR_1000nM_C1_vs_Aplan_7298_NR_Parent	chr13	30947608	30947608	C	G	Hus1b	c.67G>C	p.Val23Leu	missense_variant	MODERATE	31	0	0.032	47	11	0.251	2.59895
Aplan_7298_NR_1000nM_C1_vs_Aplan_7298_NR_Parent	chr13	31626647	31626647	C	G	Foxf2	c.568C>G	p.Arg190Gly	missense_variant	MODERATE	109	0	0.01	115	39	0.317	6.11978
Aplan_7298_NR_1000nM_C1_vs_Aplan_7298_NR_Parent	chr13	32881914	32881914	C	G	Serpinb1c	c.1047G>C	p.Thr349Thr	synonymous_variant	LOW	116	0	0.009743	120	33	0.268	6.02157
Aplan_7298_NR_1000nM_C1_vs_Aplan_7298_NR_Parent	chr13	34893773	34893773	C	G	Prpf4b	c.1948C>G	p.Arg650Gly	missense_variant	MODERATE	91	0	0.014	93	23	0.267	5.79674
Aplan_7298_NR_1000nM_C1_vs_Aplan_7298_NR_Parent	chr13	41008240	41008240	C	G	Pak1ip1	c.398C>G	p.Pro133Arg	missense_variant	MODERATE	149	0	0.00812	151	32	0.209	6.11482
Aplan_7298_NR_1000nM_C1_vs_Aplan_7298_NR_Parent	chr13	41316021	41316021	G	C	Nedd9	c.1655C>G	p.Ala552Gly	missense_variant	MODERATE	105	0	0.009804	129	31	0.249	5.96802
Aplan_7298_NR_1000nM_C1_vs_Aplan_7298_NR_Parent	chr13	46646612	46646612	C	G	Cap2	c.1293C>G	p.Ile431Met	missense_variant	MODERATE	53	0	0.022	48	17	0.357	6.27505
Aplan_7298_NR_1000nM_C1_vs_Aplan_7298_NR_Parent	chr13	51171459	51171459	C	G	Nxnl2	c.137C>G	p.Pro46Arg	missense_variant	MODERATE	53	0	0.02	37	12	0.327	5.16983
Aplan_7298_NR_1000nM_C1_vs_Aplan_7298_NR_Parent	chr13	51665480	51665480	C	G	Secisbp2	c.1089+6C>G		splice_region_variant&intron_variant	LOW	83	0	0.013	93	20	0.236	5.97796
Aplan_7298_NR_1000nM_C1_vs_Aplan_7298_NR_Parent	chr13	51703345	51703345	C	G	Sema4d	c.1850G>C	p.Gly617Ala	missense_variant	MODERATE	102	0	0.011	79	18	0.216	7.01253
Aplan_7298_NR_1000nM_C1_vs_Aplan_7298_NR_Parent	chr13	51703350	51703350	C	G	Sema4d	c.1845G>C	p.Ser615Ser	synonymous_variant	LOW	100	0	0.011	79	17	0.203	6.50416
Aplan_7298_NR_1000nM_C1_vs_Aplan_7298_NR_Parent	chr13	51711312	51711312	G	C	Sema4d	c.995C>G	p.Thr332Arg	missense_variant	MODERATE	50	0	0.02	46	11	0.244	3.82023
Aplan_7298_NR_1000nM_C1_vs_Aplan_7298_NR_Parent	chr13	54467963	54467963	C	G	Thoc3	c.287G>C	p.Arg96Pro	missense_variant	MODERATE	69	0	0.016	90	23	0.268	6.06042
Aplan_7298_NR_1000nM_C1_vs_Aplan_7298_NR_Parent	chr13	55380986	55380986	G	C	Rgs14	c.939G>C	p.Thr313Thr	synonymous_variant	LOW	62	0	0.019	52	14	0.25	5.24731
Aplan_7298_NR_1000nM_C1_vs_Aplan_7298_NR_Parent	chr13	55472588	55472588	C	T	Prr7	c.413-5C>T		splice_region_variant&intron_variant	LOW	10	0	0.081	13	6	0.499	1.71944
Aplan_7298_NR_1000nM_C1_vs_Aplan_7298_NR_Parent	chr13	55472666	55472666	C	G	Prr7	c.486C>G	p.Ser162Arg	missense_variant	MODERATE	32	0	0.038	20	8	0.353	3.77626
Aplan_7298_NR_1000nM_C1_vs_Aplan_7298_NR_Parent	chr13	55477607	55477607	G	C	Dbn1	c.905C>G	p.Ser302Trp	missense_variant	MODERATE	140	0	0.00791	124	34	0.28	5.83611
Aplan_7298_NR_1000nM_C1_vs_Aplan_7298_NR_Parent	chr13	55524084	55524084	G	C	Dok3	c.673C>G	p.Arg225Gly	missense_variant	MODERATE	44	0	0.024	36	8	0.257	2.98134
Aplan_7298_NR_1000nM_C1_vs_Aplan_7298_NR_Parent	chr13	55808074	55808074	C	G	Catsper3	c.991C>G	p.Arg331Gly	missense_variant	MODERATE	56	0	0.019	70	17	0.222	4.62747
Aplan_7298_NR_1000nM_C1_vs_Aplan_7298_NR_Parent	chr13	56887393	56887393	C	G	Trpc7	c.726G>C	p.Ala242Ala	synonymous_variant	LOW	52	0	0.023	34	13	0.4	5.97216
Aplan_7298_NR_1000nM_C1_vs_Aplan_7298_NR_Parent	chr13	74356641	74356641	C	G	Ccdc127	c.307C>G	p.Arg103Gly	missense_variant	MODERATE	54	1	0.022	56	16	0.26	4.03326
Aplan_7298_NR_1000nM_C1_vs_Aplan_7298_NR_Parent	chr13	76055662	76055662	C	G	Gpr150	c.1163G>C	p.Arg388Pro	missense_variant	MODERATE	49	0	0.022	59	14	0.26	4
Aplan_7298_NR_1000nM_C1_vs_Aplan_7298_NR_Parent	chr13	76056457	76056457	G	C	Gpr150	c.368C>G	p.Pro123Arg	missense_variant	MODERATE	30	0	0.035	43	9	0.245	2.06811
Aplan_7298_NR_1000nM_C1_vs_Aplan_7298_NR_Parent	chr13	93711325	93711325	C	G	Dmgdh	c.1529C>G	p.Pro510Arg	missense_variant	MODERATE	46	0	0.022	66	15	0.241	3.49425
Aplan_7298_NR_1000nM_C1_vs_Aplan_7298_NR_Parent	chr13	93794099	93794099	C	T	Arsb	c.574C>T	p.Arg192Cys	missense_variant	MODERATE	51	0	0.024	58	17	0.288	5.1867
Aplan_7298_NR_1000nM_C1_vs_Aplan_7298_NR_Parent	chr13	95436514	95436514	C	G	Crhbp	c.702G>C	p.Ala234Ala	synonymous_variant	LOW	39	0	0.028	22	5	0.26	2.35394
Aplan_7298_NR_1000nM_C1_vs_Aplan_7298_NR_Parent	chr13	95514170	95514170	G	A	F2rl1	c.203C>T	p.Ala68Val	missense_variant	MODERATE	70	0	0.017	70	21	0.304	6.78757
Aplan_7298_NR_1000nM_C1_vs_Aplan_7298_NR_Parent	chr13	96656696	96656696	G	C	Hmgcr	c.1427C>G	p.Pro476Arg	missense_variant	MODERATE	59	0	0.021	49	13	0.273	4.89443
Aplan_7298_NR_1000nM_C1_vs_Aplan_7298_NR_Parent	chr13	99434741	99434741	C	T	Map1b	c.1471G>A	p.Gly491Arg	missense_variant	MODERATE	104	0	0.01	115	35	0.3	6.24498
Aplan_7298_NR_1000nM_C1_vs_Aplan_7298_NR_Parent	chr13	100482973	100482973	G	C	Gtf2h2	c.435C>G	p.Leu145Leu	synonymous_variant	LOW	138	0	0.008198	143	49	0.344	5.82828
Aplan_7298_NR_1000nM_C1_vs_Aplan_7298_NR_Parent	chr13	102704774	102704774	C	T	Cd180	c.327C>T	p.Thr109Thr	synonymous_variant	LOW	89	0	0.012	107	25	0.25	6.48346
Aplan_7298_NR_1000nM_C1_vs_Aplan_7298_NR_Parent	chr13	108271815	108271815	C	G	Elovl7	c.347C>G	p.Thr116Ser	missense_variant	MODERATE	97	0	0.012	101	20	0.21	6.1426
Aplan_7298_NR_1000nM_C1_vs_Aplan_7298_NR_Parent	chr13	112501186	112501186	G	C	Il6st	c.1908G>C	p.Leu636Phe	missense_variant	MODERATE	97	0	0.012	88	24	0.273	6.85788
Aplan_7298_NR_1000nM_C1_vs_Aplan_7298_NR_Parent	chr13	112525849	112525849	G	C	Il31ra	c.1668C>G	p.Leu556Leu	synonymous_variant	LOW	70	0	0.017	45	19	0.417	7.29636
Aplan_7298_NR_1000nM_C1_vs_Aplan_7298_NR_Parent	chr13	112690247	112690247	C	G	Slc38a9	c.518C>G	p.Thr173Arg	missense_variant	MODERATE	81	0	0.015	74	23	0.31	6.61804
Aplan_7298_NR_1000nM_C1_vs_Aplan_7298_NR_Parent	chr13	113043244	113043244	C	G	Gpx8	c.522G>C	p.Glu174Asp	missense_variant	MODERATE	65	0	0.016	68	15	0.217	4.57163
Aplan_7298_NR_1000nM_C1_vs_Aplan_7298_NR_Parent	chr13	113078797	113078797	C	G	Cdc20b	c.894+4C>G		splice_region_variant&intron_variant	LOW	64	0	0.017	48	13	0.277	5.24578
Aplan_7298_NR_1000nM_C1_vs_Aplan_7298_NR_Parent	chr13	113617679	113617679	C	G	Snx18	c.717G>C	p.Ala239Ala	synonymous_variant	LOW	59	0	0.018	61	13	0.228	3.91658
Aplan_7298_NR_1000nM_C1_vs_Aplan_7298_NR_Parent	chr13	116862246	116862246	G	C	Parp8	c.2537C>G	p.Pro846Arg	missense_variant	MODERATE	55	0	0.02	92	20	0.217	4.12722
Aplan_7298_NR_1000nM_C1_vs_Aplan_7298_NR_Parent	chr13	116868135	116868135	C	G	Parp8	c.2265G>C	p.Thr755Thr	synonymous_variant	LOW	53	0	0.021	64	15	0.246	3.99472
Aplan_7298_NR_1000nM_C1_vs_Aplan_7298_NR_Parent	chr14	20570338	20570338	G	C	Usp54	c.2098C>G	p.Arg700Gly	missense_variant	MODERATE	172	0	0.006844	169	43	0.243	5.9712
Aplan_7298_NR_1000nM_C1_vs_Aplan_7298_NR_Parent	chr14	20583367	20583367	G	C	Usp54	c.1099C>G	p.Gln367Glu	missense_variant	MODERATE	73	0	0.016	74	29	0.409	5.74964
Aplan_7298_NR_1000nM_C1_vs_Aplan_7298_NR_Parent	chr14	20588334	20588334	G	C	Usp54	c.677C>G	p.Pro226Arg	missense_variant&splice_region_variant	MODERATE	139	0	0.008075	156	39	0.246	6.33187
Aplan_7298_NR_1000nM_C1_vs_Aplan_7298_NR_Parent	chr14	21686790	21686790	C	G	Dupd1	c.243G>C	p.Thr81Thr	synonymous_variant	LOW	37	0	0.031	35	6	0.234	1.98343
Aplan_7298_NR_1000nM_C1_vs_Aplan_7298_NR_Parent	chr14	21847366	21847366	C	G	Comtd1	c.698G>C	p.Arg233Pro	missense_variant	MODERATE	28	0	0.04	31	11	0.355	3.42105
Aplan_7298_NR_1000nM_C1_vs_Aplan_7298_NR_Parent	chr14	23526741	23526741	C	G	Kcnma1	c.1207G>C	p.Ala403Pro	missense_variant	MODERATE	38	0	0.03	38	11	0.266	3.37653
Aplan_7298_NR_1000nM_C1_vs_Aplan_7298_NR_Parent	chr14	26465651	26465651	G	A	Slmap	c.532C>T	p.Arg178Trp	missense_variant	MODERATE	60	0	0.019	94	19	0.212	4.21258
Aplan_7298_NR_1000nM_C1_vs_Aplan_7298_NR_Parent	chr14	30000793	30000793	G	C	Il17rb	c.621C>G	p.Tyr207*	stop_gained	HIGH	50	0	0.021	41	12	0.317	4.60145
Aplan_7298_NR_1000nM_C1_vs_Aplan_7298_NR_Parent	chr14	30107804	30107804	C	G	Cacna1d	c.2853G>C	p.Thr951Thr	synonymous_variant	LOW	56	0	0.022	49	8	0.213	2.79117
Aplan_7298_NR_1000nM_C1_vs_Aplan_7298_NR_Parent	chr14	31239200	31239200	G	C	Phf7	c.717C>G	p.Ser239Ser	synonymous_variant	LOW	52	0	0.023	43	11	0.275	4.13274
Aplan_7298_NR_1000nM_C1_vs_Aplan_7298_NR_Parent	chr14	32339299	32339299	C	G	Ogdhl	c.1446C>G	p.Asn482Lys	missense_variant	MODERATE	47	0	0.022	50	17	0.298	5.47737
Aplan_7298_NR_1000nM_C1_vs_Aplan_7298_NR_Parent	chr14	34592894	34592894	C	G	Opn4	c.1421G>C	p.Gly474Ala	missense_variant	MODERATE	54	0	0.02	73	19	0.25	4.80881
Aplan_7298_NR_1000nM_C1_vs_Aplan_7298_NR_Parent	chr14	34599906	34599906	C	G	Opn4	c.53G>C	p.Ser18Thr	missense_variant	MODERATE	44	0	0.023	35	11	0.355	4.33565
Aplan_7298_NR_1000nM_C1_vs_Aplan_7298_NR_Parent	chr14	37081471	37081471	C	G	Cdhr1	c.1647G>C	p.Val549Val	synonymous_variant	LOW	90	0	0.012	104	24	0.242	5.95756
Aplan_7298_NR_1000nM_C1_vs_Aplan_7298_NR_Parent	chr14	41087440	41087440	C	G	Dydc1	c.455C>G	p.Ala152Gly	missense_variant	MODERATE	19	0	0.056	24	9	0.435	2.60513
Aplan_7298_NR_1000nM_C1_vs_Aplan_7298_NR_Parent	chr14	52176509	52176509	G	C	Supt16	c.1516C>G	p.Arg506Gly	missense_variant	MODERATE	188	0	0.005841	203	45	0.229	6.06318
Aplan_7298_NR_1000nM_C1_vs_Aplan_7298_NR_Parent	chr14	52180194	52180194	G	A	Supt16	c.862C>T	p.Arg288Cys	missense_variant	MODERATE	68	0	0.017	88	32	0.358	6.27185
Aplan_7298_NR_1000nM_C1_vs_Aplan_7298_NR_Parent	chr14	54626220	54626220	G	C	Psmb11	c.894G>C	p.Lys298Asn	missense_variant	MODERATE	55	1	0.031	49	9	0.2	2.23923
Aplan_7298_NR_1000nM_C1_vs_Aplan_7298_NR_Parent	chr14	54638927	54638927	G	C	Cdh24	c.440C>G	p.Pro147Arg	missense_variant	MODERATE	53	0	0.02	55	16	0.299	5.05744
Aplan_7298_NR_1000nM_C1_vs_Aplan_7298_NR_Parent	chr14	54645618	54645618	G	C	Acin1	c.2895C>G	p.His965Gln	missense_variant	MODERATE	33	0	0.031	35	13	0.363	4.18485
Aplan_7298_NR_1000nM_C1_vs_Aplan_7298_NR_Parent	chr14	55788296	55788296	C	G	Ripk3	c.106G>C	p.Val36Leu	missense_variant	MODERATE	97	0	0.012	76	23	0.324	5.99135
Aplan_7298_NR_1000nM_C1_vs_Aplan_7298_NR_Parent	chr14	57542484	57542484	G	C	Il17d	c.462G>C	p.Ala154Ala	synonymous_variant	LOW	16	0	0.059	34	6	0.203	0.799321
Aplan_7298_NR_1000nM_C1_vs_Aplan_7298_NR_Parent	chr14	57542497	57542497	G	C	Il17d	c.475G>C	p.Gly159Arg	missense_variant	MODERATE	15	0	0.067	35	10	0.327	1.6505
Aplan_7298_NR_1000nM_C1_vs_Aplan_7298_NR_Parent	chr14	59684922	59684922	C	G	Atp8a2	c.3250G>C	p.Gly1084Arg	missense_variant	MODERATE	188	0	0.006099	211	53	0.252	5.87581
Aplan_7298_NR_1000nM_C1_vs_Aplan_7298_NR_Parent	chr14	60779692	60779692	G	C	C1qtnf9	c.670G>C	p.Asp224His	missense_variant	MODERATE	115	0	0.009803	81	20	0.264	6.77083
Aplan_7298_NR_1000nM_C1_vs_Aplan_7298_NR_Parent	chr14	64767642	64767642	G	C	Kif13b	c.3382G>C	p.Ala1128Pro	missense_variant	MODERATE	31	0	0.033	27	6	0.25	2.13588
Aplan_7298_NR_1000nM_C1_vs_Aplan_7298_NR_Parent	chr14	66213400	66213400	C	G	Ptk2b	c.116G>C	p.Arg39Pro	missense_variant	MODERATE	166	0	0.007282	149	36	0.243	6.28727
Aplan_7298_NR_1000nM_C1_vs_Aplan_7298_NR_Parent	chr14	66813201	66813201	C	G	Dpysl2	c.1206G>C	p.Ser402Ser	synonymous_variant	LOW	14	0	0.079	28	5	0.2	0.8215
Aplan_7298_NR_1000nM_C1_vs_Aplan_7298_NR_Parent	chr14	68084860	68084860	C	G	Nefl	c.898C>G	p.Arg300Gly	missense_variant	MODERATE	28	0	0.039	20	5	0.249	2.04314
Aplan_7298_NR_1000nM_C1_vs_Aplan_7298_NR_Parent	chr14	78604536	78604536	G	C	Dgkh	c.1644C>G	p.Asn548Lys	missense_variant	MODERATE	29	0	0.033	38	10	0.243	2.45326
Aplan_7298_NR_1000nM_C1_vs_Aplan_7298_NR_Parent	chr14	78609573	78609573	C	G	Dgkh	c.1465G>C	p.Val489Leu	missense_variant	MODERATE	140	0	0.008945	126	35	0.289	6.09284
Aplan_7298_NR_1000nM_C1_vs_Aplan_7298_NR_Parent	chr14	78624507	78624507	G	C	Dgkh	c.721-5C>G		splice_region_variant&intron_variant	LOW	61	0	0.018	67	20	0.281	6.2704
Aplan_7298_NR_1000nM_C1_vs_Aplan_7298_NR_Parent	chr14	78925272	78925272	G	C	Vwa8	c.491G>C	p.Arg164Pro	missense_variant	MODERATE	31	0	0.036	27	12	0.384	4.71012
Aplan_7298_NR_1000nM_C1_vs_Aplan_7298_NR_Parent	chr14	79355877	79355877	C	G	Naa16	c.1258-4G>C		splice_region_variant&intron_variant	LOW	85	0	0.012	87	25	0.274	6.53964
Aplan_7298_NR_1000nM_C1_vs_Aplan_7298_NR_Parent	chr14	118902131	118902131	G	C	Dzip1	c.1150C>G	p.Arg384Gly	missense_variant	MODERATE	29	0	0.039	17	6	0.311	2.87901
Aplan_7298_NR_1000nM_C1_vs_Aplan_7298_NR_Parent	chr14	121294696	121294696	C	G	Stk24	c.888G>C	p.Ala296Ala	synonymous_variant	LOW	41	0	0.025	36	10	0.264	3.63505
Aplan_7298_NR_1000nM_C1_vs_Aplan_7298_NR_Parent	chr14	122464181	122464181	C	G	Zic5	c.1137G>C	p.Pro379Pro	synonymous_variant	LOW	53	0	0.018	62	16	0.272	4.71584
Aplan_7298_NR_1000nM_C1_vs_Aplan_7298_NR_Parent	chr15	8221850	8221850	C	G	2410089E03Rik	c.5605C>G	p.Pro1869Ala	missense_variant	MODERATE	66	0	0.019	62	18	0.31	6.31195
Aplan_7298_NR_1000nM_C1_vs_Aplan_7298_NR_Parent	chr15	10984835	10984835	G	A	Amacr	c.538G>A	p.Asp180Asn	missense_variant	MODERATE	52	0	0.021	40	11	0.293	4.36645
Aplan_7298_NR_1000nM_C1_vs_Aplan_7298_NR_Parent	chr15	36545561	36545561	G	C	Snx31	c.310C>G	p.Leu104Val	missense_variant	MODERATE	36	0	0.03	49	12	0.244	3.0294
Aplan_7298_NR_1000nM_C1_vs_Aplan_7298_NR_Parent	chr15	37279598	37279598	C	G	Grhl2	c.549C>G	p.Arg183Arg	synonymous_variant	LOW	74	0	0.014	80	22	0.284	6.20906
Aplan_7298_NR_1000nM_C1_vs_Aplan_7298_NR_Parent	chr15	41099304	41099304	A	C	Zfpm2	c.757A>C	p.Lys253Gln	missense_variant	MODERATE	29	0	0.04	35	6	0.218	1.55307
Aplan_7298_NR_1000nM_C1_vs_Aplan_7298_NR_Parent	chr15	41869636	41869636	C	G	Abra	c.33G>C	p.Gly11Gly	synonymous_variant	LOW	80	0	0.014	98	21	0.234	5.80571
Aplan_7298_NR_1000nM_C1_vs_Aplan_7298_NR_Parent	chr15	59363281	59363281	G	C	E430025E21Rik	c.777C>G	p.Tyr259*	stop_gained	HIGH	71	0	0.016	45	13	0.301	5.8772
Aplan_7298_NR_1000nM_C1_vs_Aplan_7298_NR_Parent	chr15	64130158	64130158	C	G	Asap1	c.1372G>C	p.Glu458Gln	missense_variant	MODERATE	53	0	0.023	46	12	0.266	4.37578
Aplan_7298_NR_1000nM_C1_vs_Aplan_7298_NR_Parent	chr15	66673938	66673938	C	G	Tg	c.508C>G	p.Arg170Gly	missense_variant	MODERATE	52	0	0.022	61	18	0.28	5.09776
Aplan_7298_NR_1000nM_C1_vs_Aplan_7298_NR_Parent	chr15	66682484	66682484	C	G	Tg	c.1747C>G	p.Arg583Gly	missense_variant	MODERATE	105	0	0.01	113	34	0.315	6.49386
Aplan_7298_NR_1000nM_C1_vs_Aplan_7298_NR_Parent	chr15	66789745	66789745	G	C	Sla	c.337C>G	p.Leu113Val	missense_variant	MODERATE	110	0	0.011	115	32	0.273	6.24037
Aplan_7298_NR_1000nM_C1_vs_Aplan_7298_NR_Parent	chr15	73586651	73586651	C	G	Slc45a4	c.1048G>C	p.Glu350Gln	missense_variant	MODERATE	74	0	0.014	74	20	0.278	6.36419
Aplan_7298_NR_1000nM_C1_vs_Aplan_7298_NR_Parent	chr15	73586747	73586747	C	T	Slc45a4	c.952G>A	p.Asp318Asn	missense_variant	MODERATE	60	0	0.018	78	23	0.308	6.18604
Aplan_7298_NR_1000nM_C1_vs_Aplan_7298_NR_Parent	chr15	74588107	74588107	C	G	Adgrb1	c.4408C>G	p.Arg1470Gly	missense_variant&splice_region_variant	MODERATE	128	0	0.009344	106	26	0.251	6.73207
Aplan_7298_NR_1000nM_C1_vs_Aplan_7298_NR_Parent	chr15	74671462	74671462	C	G	Arc	c.911G>C	p.Arg304Pro	missense_variant	MODERATE	174	0	0.00649	174	39	0.231	6.1904
Aplan_7298_NR_1000nM_C1_vs_Aplan_7298_NR_Parent	chr15	76185947	76185947	C	G	Plec	c.3265G>C	p.Gly1089Arg	missense_variant	MODERATE	44	0	0.024	34	8	0.25	3.11106
Aplan_7298_NR_1000nM_C1_vs_Aplan_7298_NR_Parent	chr15	76233315	76233315	G	C	Parp10	c.2870C>G	p.Pro957Arg	missense_variant	MODERATE	57	0	0.018	60	15	0.276	4.62284
Aplan_7298_NR_1000nM_C1_vs_Aplan_7298_NR_Parent	chr15	76242313	76242313	C	A	Parp10	c.674G>T	p.Arg225Leu	missense_variant	MODERATE	81	0	0.013	95	20	0.22	5.5322
Aplan_7298_NR_1000nM_C1_vs_Aplan_7298_NR_Parent	chr15	76249352	76249352	C	G	Grina	c.1024C>G	p.Arg342Gly	missense_variant	MODERATE	51	0	0.019	46	10	0.245	3.48929
Aplan_7298_NR_1000nM_C1_vs_Aplan_7298_NR_Parent	chr15	76615884	76615884	G	C	Slc39a4	c.465C>G	p.Thr155Thr	synonymous_variant	LOW	63	0	0.019	66	23	0.357	6.03744
Aplan_7298_NR_1000nM_C1_vs_Aplan_7298_NR_Parent	chr15	76624605	76624605	G	C	Vps28	c.53C>G	p.Pro18Arg	missense_variant	MODERATE	65	0	0.017	47	14	0.297	5.84711
Aplan_7298_NR_1000nM_C1_vs_Aplan_7298_NR_Parent	chr15	76737595	76737595	G	C	Arhgap39	c.805C>G	p.Arg269Gly	missense_variant	MODERATE	51	0	0.019	73	17	0.247	4.11333
Aplan_7298_NR_1000nM_C1_vs_Aplan_7298_NR_Parent	chr15	78611474	78611474	C	G	Cyth4	c.573C>G	p.Ser191Ser	synonymous_variant	LOW	53	0	0.022	48	13	0.302	4.62635
Aplan_7298_NR_1000nM_C1_vs_Aplan_7298_NR_Parent	chr15	78611554	78611554	G	C	Cyth4	c.653G>C	p.Arg218Pro	missense_variant	MODERATE	59	0	0.021	62	17	0.311	5.33693
Aplan_7298_NR_1000nM_C1_vs_Aplan_7298_NR_Parent	chr15	78672629	78672629	C	G	Elfn2	c.1717G>C	p.Gly573Arg	missense_variant	MODERATE	30	0	0.033	32	8	0.29	2.31498
Aplan_7298_NR_1000nM_C1_vs_Aplan_7298_NR_Parent	chr15	78930070	78930070	C	G	Lgals1	c.334C>G	p.Arg112Gly	missense_variant	MODERATE	50	0	0.023	75	25	0.328	5.96576
Aplan_7298_NR_1000nM_C1_vs_Aplan_7298_NR_Parent	chr15	78940497	78940497	C	T	Nol12	c.523C>T	p.Arg175Trp	missense_variant	MODERATE	87	0	0.014	44	10	0.232	5.06535
Aplan_7298_NR_1000nM_C1_vs_Aplan_7298_NR_Parent	chr15	78993179	78993179	G	C	Triobp	c.4910G>C	p.Arg1637Pro	missense_variant	MODERATE	55	0	0.02	43	11	0.282	4.28957
Aplan_7298_NR_1000nM_C1_vs_Aplan_7298_NR_Parent	chr15	78993202	78993202	G	C	Triobp	c.4933G>C	p.Gly1645Arg	missense_variant	MODERATE	65	0	0.018	45	12	0.29	5.08742
Aplan_7298_NR_1000nM_C1_vs_Aplan_7298_NR_Parent	chr15	79792759	79792759	C	G	Nptxr	c.921G>C	p.Pro307Pro	synonymous_variant	LOW	34	1	0.033	22	8	0.391	2.82369
Aplan_7298_NR_1000nM_C1_vs_Aplan_7298_NR_Parent	chr15	81016773	81016773	G	C	Mkl1	c.1621C>G	p.Arg541Gly	missense_variant	MODERATE	64	0	0.016	63	15	0.266	4.98016
Aplan_7298_NR_1000nM_C1_vs_Aplan_7298_NR_Parent	chr15	81693803	81693803	C	G	Chadl	c.1624G>C	p.Gly542Arg	missense_variant	MODERATE	33	0	0.036	26	5	0.217	1.88143
Aplan_7298_NR_1000nM_C1_vs_Aplan_7298_NR_Parent	chr15	81793149	81793149	C	G	Zc3h7b	c.2650C>G	p.Arg884Gly	missense_variant	MODERATE	83	0	0.014	69	18	0.284	6.77556
Aplan_7298_NR_1000nM_C1_vs_Aplan_7298_NR_Parent	chr15	82062858	82062858	G	C	4930407I10Rik	c.955G>C	p.Gly319Arg	missense_variant	MODERATE	48	1	0.041	34	9	0.278	2.90722
Aplan_7298_NR_1000nM_C1_vs_Aplan_7298_NR_Parent	chr15	82124863	82124863	G	C	Mei1	c.3530G>C	p.Arg1177Pro	missense_variant	MODERATE	64	0	0.018	93	29	0.322	5.88577
Aplan_7298_NR_1000nM_C1_vs_Aplan_7298_NR_Parent	chr15	82182055	82182055	C	G	Srebf2	c.1803C>G	p.Arg601Arg	synonymous_variant	LOW	140	0	0.008397	133	38	0.286	5.94486
Aplan_7298_NR_1000nM_C1_vs_Aplan_7298_NR_Parent	chr15	83613464	83613464	G	C	Scube1	c.2285C>G	p.Ala762Gly	missense_variant	MODERATE	68	0	0.017	74	13	0.209	3.80597
Aplan_7298_NR_1000nM_C1_vs_Aplan_7298_NR_Parent	chr15	83628007	83628007	G	C	Scube1	c.1242C>G	p.Tyr414*	stop_gained	HIGH	140	0	0.00853	118	27	0.25	6.1924
Aplan_7298_NR_1000nM_C1_vs_Aplan_7298_NR_Parent	chr15	83634768	83634768	G	C	Scube1	c.960C>G	p.Asn320Lys	missense_variant	MODERATE	70	0	0.015	83	18	0.244	4.91265
Aplan_7298_NR_1000nM_C1_vs_Aplan_7298_NR_Parent	chr15	84687935	84687935	G	A	Prr5	c.170G>A	p.Arg57His	missense_variant	MODERATE	53	0	0.022	77	15	0.204	3.43698
Aplan_7298_NR_1000nM_C1_vs_Aplan_7298_NR_Parent	chr15	85821528	85821528	C	G	Pkdrej	c.206G>C	p.Arg69Pro	missense_variant	MODERATE	35	0	0.028	32	10	0.325	3.5848
Aplan_7298_NR_1000nM_C1_vs_Aplan_7298_NR_Parent	chr15	85833206	85833206	C	G	Ttc38	c.81C>G	p.Phe27Leu	missense_variant	MODERATE	74	0	0.015	63	17	0.23	6.31803
Aplan_7298_NR_1000nM_C1_vs_Aplan_7298_NR_Parent	chr15	85918936	85918936	C	G	Celsr1	c.7401G>C	p.Ala2467Ala	synonymous_variant	LOW	41	0	0.026	44	11	0.3	3.29452
Aplan_7298_NR_1000nM_C1_vs_Aplan_7298_NR_Parent	chr15	91742341	91742341	C	T	Lrrk2	c.3587C>T	p.Pro1196Leu	missense_variant	MODERATE	102	0	0.011	118	29	0.228	6.47136
Aplan_7298_NR_1000nM_C1_vs_Aplan_7298_NR_Parent	chr15	92314491	92314491	C	T	Cntn1	c.2533C>T	p.Arg845Trp	missense_variant	MODERATE	59	0	0.019	49	12	0.283	4.48036
Aplan_7298_NR_1000nM_C1_vs_Aplan_7298_NR_Parent	chr15	93254436	93254436	C	G	Gxylt1	c.621G>C	p.Ala207Ala	synonymous_variant	LOW	71	0	0.015	92	22	0.249	5.68985
Aplan_7298_NR_1000nM_C1_vs_Aplan_7298_NR_Parent	chr15	94403503	94403503	G	C	Adamts20	c.139C>G	p.Arg47Gly	missense_variant	MODERATE	36	0	0.03	23	8	0.348	3.65538
Aplan_7298_NR_1000nM_C1_vs_Aplan_7298_NR_Parent	chr15	94527923	94527923	G	C	Pus7l	c.1596C>G	p.His532Gln	missense_variant	MODERATE	50	0	0.024	45	18	0.425	6.81135
Aplan_7298_NR_1000nM_C1_vs_Aplan_7298_NR_Parent	chr15	95094780	95094780	G	C	Tmem117	c.1320G>C	p.Ser440Ser	synonymous_variant	LOW	95	0	0.011	119	30	0.267	6.32783
Aplan_7298_NR_1000nM_C1_vs_Aplan_7298_NR_Parent	chr15	96692401	96692401	G	C	Slc38a2	c.958C>G	p.Arg320Gly	missense_variant	MODERATE	116	0	0.009517	84	18	0.219	7.29166
Aplan_7298_NR_1000nM_C1_vs_Aplan_7298_NR_Parent	chr15	97753872	97753872	G	C	Rapgef3	c.1739C>G	p.Pro580Arg	missense_variant	MODERATE	89	0	0.013	76	20	0.271	7.40507
Aplan_7298_NR_1000nM_C1_vs_Aplan_7298_NR_Parent	chr15	97758409	97758409	G	C	Rapgef3	c.1136C>G	p.Pro379Arg	missense_variant	MODERATE	109	0	0.011	80	21	0.253	6.99925
Aplan_7298_NR_1000nM_C1_vs_Aplan_7298_NR_Parent	chr15	97761210	97761210	C	G	Rapgef3	c.400G>C	p.Glu134Gln	missense_variant	MODERATE	58	0	0.019	37	9	0.25	3.9752
Aplan_7298_NR_1000nM_C1_vs_Aplan_7298_NR_Parent	chr15	98456430	98456430	C	G	Olfr281	c.119C>G	p.Thr40Arg	missense_variant	MODERATE	184	0	0.00622	181	36	0.206	6.20122
Aplan_7298_NR_1000nM_C1_vs_Aplan_7298_NR_Parent	chr15	98648684	98648684	G	C	Ddx23	c.1603C>G	p.Arg535Gly	missense_variant	MODERATE	51	0	0.021	50	14	0.276	4.73796
Aplan_7298_NR_1000nM_C1_vs_Aplan_7298_NR_Parent	chr15	98792554	98792554	C	G	Wnt1	c.763C>G	p.Arg255Gly	missense_variant	MODERATE	64	0	0.016	67	19	0.316	6.03059
Aplan_7298_NR_1000nM_C1_vs_Aplan_7298_NR_Parent	chr15	98857859	98857859	G	C	Kmt2d	c.4314C>G	p.Ala1438Ala	synonymous_variant	LOW	59	0	0.017	48	14	0.32	5.40168
Aplan_7298_NR_1000nM_C1_vs_Aplan_7298_NR_Parent	chr15	98893961	98893961	G	C	Dhh	c.1165C>G	p.Arg389Gly	missense_variant	MODERATE	34	0	0.035	35	6	0.219	1.60626
Aplan_7298_NR_1000nM_C1_vs_Aplan_7298_NR_Parent	chr15	98894850	98894850	G	T	Dhh	c.528C>A	p.Tyr176*	stop_gained	HIGH	101	0	0.011	105	21	0.221	6.47216
Aplan_7298_NR_1000nM_C1_vs_Aplan_7298_NR_Parent	chr15	99055358	99055358	G	C	Prph	c.152G>C	p.Arg51Pro	missense_variant	MODERATE	73	0	0.015	52	14	0.284	5.84041
Aplan_7298_NR_1000nM_C1_vs_Aplan_7298_NR_Parent	chr15	99055408	99055409	CG	GC	Prph	c.202_203delCGinsGC	p.Arg68Ala	missense_variant	MODERATE	50	0	0.02	47	11	0.255	3.75671
Aplan_7298_NR_1000nM_C1_vs_Aplan_7298_NR_Parent	chr15	99056137	99056137	G	A	Prph	c.591G>A	p.Ala197Ala	synonymous_variant	LOW	46	0	0.024	27	5	0.215	2.26964
Aplan_7298_NR_1000nM_C1_vs_Aplan_7298_NR_Parent	chr15	99087416	99087416	C	G	C1ql4	c.313G>C	p.Gly105Arg	missense_variant	MODERATE	65	0	0.018	44	11	0.257	4.69924
Aplan_7298_NR_1000nM_C1_vs_Aplan_7298_NR_Parent	chr15	99334924	99334924	G	C	Fmnl3	c.298C>G	p.Arg100Gly	missense_variant	MODERATE	68	0	0.017	64	26	0.396	6.49567
Aplan_7298_NR_1000nM_C1_vs_Aplan_7298_NR_Parent	chr15	99424258	99424258	G	C	Nckap5l	c.3088C>G	p.Pro1030Ala	missense_variant	MODERATE	40	0	0.029	50	10	0.222	2.71134
Aplan_7298_NR_1000nM_C1_vs_Aplan_7298_NR_Parent	chr15	99709308	99709308	C	A	Smarcd1	c.1161C>A	p.Thr387Thr	synonymous_variant	LOW	74	0	0.015	101	24	0.245	5.74681
Aplan_7298_NR_1000nM_C1_vs_Aplan_7298_NR_Parent	chr15	100292519	100292519	G	C	Tmprss12	c.769G>C	p.Gly257Arg	missense_variant	MODERATE	61	0	0.018	58	13	0.227	4.39356
Aplan_7298_NR_1000nM_C1_vs_Aplan_7298_NR_Parent	chr15	100292601	100292601	G	C	Tmprss12	c.851G>C	p.Arg284Pro	missense_variant	MODERATE	62	0	0.018	51	12	0.221	4.49315
Aplan_7298_NR_1000nM_C1_vs_Aplan_7298_NR_Parent	chr15	100353566	100353566	C	G	Mettl7a2	c.357C>G	p.Phe119Leu	missense_variant	MODERATE	70	0	0.015	68	16	0.234	5.35762
Aplan_7298_NR_1000nM_C1_vs_Aplan_7298_NR_Parent	chr15	101287194	101287194	C	T	Atg101	c.196C>T	p.Arg66Cys	missense_variant	MODERATE	66	0	0.017	50	14	0.266	5.63513
Aplan_7298_NR_1000nM_C1_vs_Aplan_7298_NR_Parent	chr15	102179055	102179055	G	C	Csad	c.1072C>G	p.Arg358Gly	missense_variant	MODERATE	67	0	0.016	68	20	0.295	6.43119
Aplan_7298_NR_1000nM_C1_vs_Aplan_7298_NR_Parent	chr15	102179143	102179143	G	C	Csad	c.984C>G	p.Cys328Trp	missense_variant	MODERATE	66	0	0.016	44	12	0.272	5.22212
Aplan_7298_NR_1000nM_C1_vs_Aplan_7298_NR_Parent	chr15	102180010	102180010	G	C	Csad	c.780C>G	p.Ala260Ala	synonymous_variant	LOW	58	0	0.02	35	12	0.297	5.6983
Aplan_7298_NR_1000nM_C1_vs_Aplan_7298_NR_Parent	chr15	102981843	102981843	C	G	Hoxc9	c.191C>G	p.Thr64Arg	missense_variant	MODERATE	47	0	0.025	40	9	0.236	3.27319
Aplan_7298_NR_1000nM_C1_vs_Aplan_7298_NR_Parent	chr16	4482904	4482904	C	G	Srl	c.2302G>C	p.Ala768Pro	missense_variant	MODERATE	41	0	0.026	24	9	0.411	4.38826
Aplan_7298_NR_1000nM_C1_vs_Aplan_7298_NR_Parent	chr16	4649172	4649172	C	G	Vasn	c.982C>G	p.Arg328Gly	missense_variant	MODERATE	55	0	0.02	64	28	0.44	6.09888
Aplan_7298_NR_1000nM_C1_vs_Aplan_7298_NR_Parent	chr16	5077781	5077781	C	G	Ubn1	c.2690C>G	p.Pro897Arg	missense_variant	MODERATE	34	0	0.03	39	24	0.592	6.06466
Aplan_7298_NR_1000nM_C1_vs_Aplan_7298_NR_Parent	chr16	9657804	9657804	G	C	Grin2a	c.1652-5C>G		splice_region_variant&intron_variant	LOW	32	0	0.033	18	11	0.6	6.06958
Aplan_7298_NR_1000nM_C1_vs_Aplan_7298_NR_Parent	chr16	17213244	17213244	C	G	Rimbp3	c.4531C>G	p.Arg1511Gly	missense_variant	MODERATE	35	0	0.031	43	24	0.549	6.08896
Aplan_7298_NR_1000nM_C1_vs_Aplan_7298_NR_Parent	chr16	17469086	17469086	C	G	Crkl	c.505C>G	p.Arg169Gly	missense_variant	MODERATE	57	0	0.018	54	19	0.378	6.15223
Aplan_7298_NR_1000nM_C1_vs_Aplan_7298_NR_Parent	chr16	18397951	18397951	C	G	Arvcf	c.1027C>G	p.Arg343Gly	missense_variant	MODERATE	22	0	0.041	15	6	0.467	2.66698
Aplan_7298_NR_1000nM_C1_vs_Aplan_7298_NR_Parent	chr16	18398004	18398004	C	G	Arvcf	c.1080C>G	p.Pro360Pro	synonymous_variant	LOW	21	0	0.046	19	9	0.526	3.47129
Aplan_7298_NR_1000nM_C1_vs_Aplan_7298_NR_Parent	chr16	18403450	18403450	C	G	Arvcf	c.2367C>G	p.Ser789Ser	synonymous_variant	LOW	26	0	0.038	36	15	0.428	4.19617
Aplan_7298_NR_1000nM_C1_vs_Aplan_7298_NR_Parent	chr16	24845139	24845139	C	G	Lpp	c.1165C>G	p.Arg389Gly	missense_variant	MODERATE	37	0	0.032	19	8	0.4	4.27402
Aplan_7298_NR_1000nM_C1_vs_Aplan_7298_NR_Parent	chr16	25960400	25960400	G	C	P3h2	c.2070C>G	p.Arg690Arg	synonymous_variant	LOW	102	0	0.012	123	37	0.272	6.48207
Aplan_7298_NR_1000nM_C1_vs_Aplan_7298_NR_Parent	chr16	28828597	28828597	C	G	Mb21d2	c.624G>C	p.Pro208Pro	synonymous_variant	LOW	55	0	0.019	72	16	0.24	4.21287
Aplan_7298_NR_1000nM_C1_vs_Aplan_7298_NR_Parent	chr16	31449938	31449938	C	G	Bdh1	c.382C>G	p.Arg128Gly	missense_variant	MODERATE	60	0	0.019	31	8	0.311	4.03235
Aplan_7298_NR_1000nM_C1_vs_Aplan_7298_NR_Parent	chr16	32463120	32463120	G	C	Pcyt1a	c.424G>C	p.Val142Leu	missense_variant	MODERATE	61	0	0.019	57	16	0.284	5.60443
Aplan_7298_NR_1000nM_C1_vs_Aplan_7298_NR_Parent	chr16	32499639	32499639	C	G	Zdhhc19	c.600C>G	p.Pro200Pro	synonymous_variant	LOW	65	0	0.018	58	14	0.236	4.97835
Aplan_7298_NR_1000nM_C1_vs_Aplan_7298_NR_Parent	chr16	33264337	33264337	G	C	Snx4	c.220G>C	p.Val74Leu	missense_variant	MODERATE	128	0	0.009224	119	26	0.236	5.98736
Aplan_7298_NR_1000nM_C1_vs_Aplan_7298_NR_Parent	chr16	33766726	33766726	C	G	Heg1	c.3165C>G	p.Pro1055Pro	synonymous_variant	LOW	59	0	0.019	70	26	0.39	6.0034
Aplan_7298_NR_1000nM_C1_vs_Aplan_7298_NR_Parent	chr16	35735405	35735405	G	C	Dirc2	c.684C>G	p.Ile228Met	missense_variant	MODERATE	33	0	0.031	64	22	0.356	4.58382
Aplan_7298_NR_1000nM_C1_vs_Aplan_7298_NR_Parent	chr16	35787304	35787304	C	G	Hspbap1	c.179C>G	p.Ala60Gly	missense_variant	MODERATE	59	0	0.02	52	13	0.245	4.67481
Aplan_7298_NR_1000nM_C1_vs_Aplan_7298_NR_Parent	chr16	35932832	35932832	C	G	Dtx3l	c.1403G>C	p.Arg468Pro	missense_variant	MODERATE	112	0	0.01	112	27	0.243	5.80898
Aplan_7298_NR_1000nM_C1_vs_Aplan_7298_NR_Parent	chr16	38610770	38610770	C	G	Arhgap31	c.1047G>C	p.Ser349Ser	synonymous_variant	LOW	62	1	0.019	79	17	0.215	3.59987
Aplan_7298_NR_1000nM_C1_vs_Aplan_7298_NR_Parent	chr16	38780090	38780090	C	G	Upk1b	c.527G>C	p.Arg176Pro	missense_variant	MODERATE	35	0	0.03	34	7	0.235	2.30223
Aplan_7298_NR_1000nM_C1_vs_Aplan_7298_NR_Parent	chr16	45580240	45580240	C	G	Slc9c1	c.2212C>G	p.Arg738Gly	missense_variant	MODERATE	59	0	0.019	57	11	0.21	3.62944
Aplan_7298_NR_1000nM_C1_vs_Aplan_7298_NR_Parent	chr16	59000416	59000416	C	G	Olfr183	c.730C>G	p.His244Asp	missense_variant	MODERATE	121	0	0.008936	159	47	0.285	6.2395
Aplan_7298_NR_1000nM_C1_vs_Aplan_7298_NR_Parent	chr16	59524935	59524935	C	G	Crybg3	c.2841G>C	p.Glu947Asp	missense_variant	MODERATE	64	0	0.02	41	12	0.315	5.39285
Aplan_7298_NR_1000nM_C1_vs_Aplan_7298_NR_Parent	chr16	66784804	66784804	C	G	Cadm2	c.613G>C	p.Asp205His	missense_variant	MODERATE	18	0	0.055	18	7	0.372	2.11778
Aplan_7298_NR_1000nM_C1_vs_Aplan_7298_NR_Parent	chr16	94328531	94328531	G	C	Ripply3	c.35G>C	p.Arg12Pro	missense_variant	MODERATE	50	0	0.023	39	9	0.205	3.47704
Aplan_7298_NR_1000nM_C1_vs_Aplan_7298_NR_Parent	chr17	6176949	6176949	G	C	Tulp4	c.373G>C	p.Gly125Arg	missense_variant	MODERATE	46	0	0.024	30	9	0.315	3.99816
Aplan_7298_NR_1000nM_C1_vs_Aplan_7298_NR_Parent	chr17	7352265	7352265	G	T	Ttll2	c.262C>A	p.Arg88Arg	synonymous_variant	LOW	181	0	0.006475	194	49	0.25	6.0014
Aplan_7298_NR_1000nM_C1_vs_Aplan_7298_NR_Parent	chr17	12388505	12388505	G	C	Plg	c.308G>C	p.Cys103Ser	missense_variant	MODERATE	39	0	0.029	45	11	0.255	3.19605
Aplan_7298_NR_1000nM_C1_vs_Aplan_7298_NR_Parent	chr17	23760820	23760820	C	G	Flywch1	c.979G>C	p.Asp327His	missense_variant	MODERATE	46	0	0.023	41	10	0.261	3.5525
Aplan_7298_NR_1000nM_C1_vs_Aplan_7298_NR_Parent	chr17	23760976	23760976	G	C	Flywch1	c.823C>G	p.Arg275Gly	missense_variant	MODERATE	57	0	0.02	45	10	0.222	3.82458
Aplan_7298_NR_1000nM_C1_vs_Aplan_7298_NR_Parent	chr17	24441922	24441922	G	C	Dnase1l2	c.467C>G	p.Ala156Gly	missense_variant	MODERATE	48	0	0.021	60	15	0.259	4.02209
Aplan_7298_NR_1000nM_C1_vs_Aplan_7298_NR_Parent	chr17	24444813	24444813	C	G	E4f1	c.1752G>C	p.Ala584Ala	synonymous_variant	LOW	46	0	0.021	48	15	0.326	4.76276
Aplan_7298_NR_1000nM_C1_vs_Aplan_7298_NR_Parent	chr17	24445234	24445234	C	G	E4f1	c.1478G>C	p.Gly493Ala	missense_variant	MODERATE	55	0	0.019	48	14	0.282	5.15432
Aplan_7298_NR_1000nM_C1_vs_Aplan_7298_NR_Parent	chr17	24496461	24496461	C	G	Caskin1	c.280C>G	p.Arg94Gly	missense_variant	MODERATE	55	0	0.02	61	17	0.276	5.22771
Aplan_7298_NR_1000nM_C1_vs_Aplan_7298_NR_Parent	chr17	24501094	24501094	C	G	Caskin1	c.1274C>G	p.Ser425Cys	missense_variant	MODERATE	60	1	0.034	66	19	0.303	4.8441
Aplan_7298_NR_1000nM_C1_vs_Aplan_7298_NR_Parent	chr17	24505066	24505066	C	G	Caskin1	c.2827C>G	p.Arg943Gly	missense_variant	MODERATE	64	0	0.017	44	9	0.226	3.74173
Aplan_7298_NR_1000nM_C1_vs_Aplan_7298_NR_Parent	chr17	24505212	24505212	C	G	Caskin1	c.2973C>G	p.Leu991Leu	synonymous_variant	LOW	79	0	0.014	44	12	0.267	5.83378
Aplan_7298_NR_1000nM_C1_vs_Aplan_7298_NR_Parent	chr17	24506779	24506779	C	G	Caskin1	c.4038C>G	p.Arg1346Arg	synonymous_variant	LOW	42	0	0.023	49	15	0.308	4.51523
Aplan_7298_NR_1000nM_C1_vs_Aplan_7298_NR_Parent	chr17	24509566	24509566	C	G	Traf7	c.1961G>C	p.Arg654Pro	missense_variant	MODERATE	94	0	0.012	63	15	0.259	6.43534
Aplan_7298_NR_1000nM_C1_vs_Aplan_7298_NR_Parent	chr17	24514200	24514200	G	C	Traf7	c.363C>G	p.Ala121Ala	synonymous_variant	LOW	67	0	0.016	34	8	0.273	4.04653
Aplan_7298_NR_1000nM_C1_vs_Aplan_7298_NR_Parent	chr17	24657417	24657417	G	C	Npw	c.519C>G	p.Arg173Arg	synonymous_variant	LOW	103	0	0.012	52	18	0.375	6.41993
Aplan_7298_NR_1000nM_C1_vs_Aplan_7298_NR_Parent	chr17	24698538	24698538	C	A	Noxo1	c.87C>A	p.Cys29*	stop_gained	HIGH	84	0	0.013	63	16	0.258	6.42482
Aplan_7298_NR_1000nM_C1_vs_Aplan_7298_NR_Parent	chr17	24698829	24698829	G	C	Noxo1	c.191G>C	p.Arg64Pro	missense_variant	MODERATE	87	0	0.012	95	27	0.288	6.57603
Aplan_7298_NR_1000nM_C1_vs_Aplan_7298_NR_Parent	chr17	24702490	24702490	G	C	Tbl3	c.1426C>G	p.Arg476Gly	missense_variant	MODERATE	66	0	0.017	58	19	0.315	7.08229
Aplan_7298_NR_1000nM_C1_vs_Aplan_7298_NR_Parent	chr17	24728324	24728324	G	C	Rpl3l	c.11G>C	p.Arg4Pro	missense_variant	MODERATE	36	0	0.031	52	18	0.361	4.66077
Aplan_7298_NR_1000nM_C1_vs_Aplan_7298_NR_Parent	chr17	25058332	25058332	C	G	Tmem204	c.578G>C	p.Arg193Pro	missense_variant	MODERATE	47	0	0.024	30	6	0.206	2.6013
Aplan_7298_NR_1000nM_C1_vs_Aplan_7298_NR_Parent	chr17	25826486	25826486	C	G	Wdr24	c.1194C>G	p.Ser398Arg	missense_variant	MODERATE	110	0	0.01	127	37	0.28	5.91836
Aplan_7298_NR_1000nM_C1_vs_Aplan_7298_NR_Parent	chr17	26432067	26432067	C	G	Neurl1b	c.312C>G	p.His104Gln	missense_variant	MODERATE	68	0	0.016	66	22	0.343	6.13112
Aplan_7298_NR_1000nM_C1_vs_Aplan_7298_NR_Parent	chr17	27985095	27985095	C	G	Anks1	c.516C>G	p.Cys172Trp	missense_variant	MODERATE	49	0	0.022	60	11	0.207	3.01365
Aplan_7298_NR_1000nM_C1_vs_Aplan_7298_NR_Parent	chr17	27985097	27985097	C	G	Anks1	c.518C>G	p.Ala173Gly	missense_variant	MODERATE	50	0	0.022	60	19	0.298	5.48538
Aplan_7298_NR_1000nM_C1_vs_Aplan_7298_NR_Parent	chr17	28299029	28299029	G	C	Ppard	c.1070G>C	p.Cys357Ser	missense_variant	MODERATE	10	0	0.089	13	5	0.4	1.33973
Aplan_7298_NR_1000nM_C1_vs_Aplan_7298_NR_Parent	chr17	28877041	28877041	C	G	Pnpla1	c.435C>G	p.Ile145Met	missense_variant	MODERATE	31	0	0.031	37	10	0.287	2.86948
Aplan_7298_NR_1000nM_C1_vs_Aplan_7298_NR_Parent	chr17	29161460	29161460	G	C	Cpne5	c.1287C>G	p.Tyr429*	stop_gained	HIGH	55	1	0.024	42	12	0.293	3.86658
Aplan_7298_NR_1000nM_C1_vs_Aplan_7298_NR_Parent	chr17	30736062	30736062	G	C	Dnah8	c.6064G>C	p.Glu2022Gln	missense_variant	MODERATE	52	0	0.02	58	11	0.222	3.17022
Aplan_7298_NR_1000nM_C1_vs_Aplan_7298_NR_Parent	chr17	31108332	31108332	G	C	Abcg1	c.1000G>C	p.Gly334Arg	missense_variant	MODERATE	29	0	0.035	36	13	0.338	3.58733
Aplan_7298_NR_1000nM_C1_vs_Aplan_7298_NR_Parent	chr17	32189400	32189400	C	G	Ephx3	c.49G>C	p.Gly17Arg	missense_variant	MODERATE	36	0	0.028	28	15	0.519	6.62945
Aplan_7298_NR_1000nM_C1_vs_Aplan_7298_NR_Parent	chr17	33817639	33817639	G	C	Kank3	c.480G>C	p.Pro160Pro	synonymous_variant	LOW	14	0	0.061	20	6	0.335	1.5079
Aplan_7298_NR_1000nM_C1_vs_Aplan_7298_NR_Parent	chr17	33935974	33935974	C	G	Rgl2	c.1951C>G	p.Arg651Gly	missense_variant	MODERATE	101	0	0.011	66	15	0.213	6.51419
Aplan_7298_NR_1000nM_C1_vs_Aplan_7298_NR_Parent	chr17	33943658	33943658	C	G	Wdr46	c.826C>G	p.Arg276Gly	missense_variant	MODERATE	130	0	0.008721	111	28	0.242	6.10525
Aplan_7298_NR_1000nM_C1_vs_Aplan_7298_NR_Parent	chr17	34064187	34064187	C	G	Col11a2	c.4583C>G	p.Ser1528Cys	missense_variant	MODERATE	47	0	0.021	42	9	0.237	3.15397
Aplan_7298_NR_1000nM_C1_vs_Aplan_7298_NR_Parent	chr17	34064220	34064220	C	G	Col11a2	c.4616C>G	p.Pro1539Arg	missense_variant	MODERATE	52	0	0.02	38	9	0.27	3.63674
Aplan_7298_NR_1000nM_C1_vs_Aplan_7298_NR_Parent	chr17	34093927	34093927	C	T	H2-Oa	c.177C>T	p.Ser59Ser	synonymous_variant	LOW	100	0	0.011	72	18	0.243	7.4157
Aplan_7298_NR_1000nM_C1_vs_Aplan_7298_NR_Parent	chr17	34148826	34148826	G	C	H2-DMb2	c.613G>C	p.Gly205Arg	missense_variant	MODERATE	47	0	0.023	45	10	0.238	3.35416
Aplan_7298_NR_1000nM_C1_vs_Aplan_7298_NR_Parent	chr17	34652997	34652997	C	G	Atf6b	c.1445C>G	p.Thr482Arg	missense_variant	MODERATE	140	0	0.00809	119	30	0.27	5.94377
Aplan_7298_NR_1000nM_C1_vs_Aplan_7298_NR_Parent	chr17	34685619	34685619	G	C	Tnxb	c.3357G>C	p.Pro1119Pro	synonymous_variant	LOW	61	0	0.019	49	12	0.245	4.58118
Aplan_7298_NR_1000nM_C1_vs_Aplan_7298_NR_Parent	chr17	34685669	34685669	G	C	Tnxb	c.3407G>C	p.Arg1136Pro	missense_variant	MODERATE	61	0	0.019	45	9	0.21	3.56887
Aplan_7298_NR_1000nM_C1_vs_Aplan_7298_NR_Parent	chr17	34685852	34685852	G	C	Tnxb	c.3590G>C	p.Gly1197Ala	missense_variant	MODERATE	29	0	0.035	34	7	0.218	1.90155
Aplan_7298_NR_1000nM_C1_vs_Aplan_7298_NR_Parent	chr17	34713739	34713739	G	C	Tnxb	c.6931G>C	p.Gly2311Arg	missense_variant	MODERATE	66	0	0.016	66	25	0.366	6.84224
Aplan_7298_NR_1000nM_C1_vs_Aplan_7298_NR_Parent	chr17	34818442	34818442	C	G	C4a	c.1798G>C	p.Gly600Arg	missense_variant	MODERATE	83	0	0.014	79	21	0.272	6.59813
Aplan_7298_NR_1000nM_C1_vs_Aplan_7298_NR_Parent	chr17	34911598	34911598	C	T	Ehmt2	c.3289C>T	p.Arg1097Trp	missense_variant	MODERATE	89	0	0.012	66	14	0.207	5.5727
Aplan_7298_NR_1000nM_C1_vs_Aplan_7298_NR_Parent	chr17	34927679	34927679	G	C	Slc44a4	c.1233G>C	p.Pro411Pro	synonymous_variant	LOW	172	0	0.006721	120	40	0.316	5.94675
Aplan_7298_NR_1000nM_C1_vs_Aplan_7298_NR_Parent	chr17	34970084	34970084	C	G	Hspa1a	c.1842G>C	p.Ala614Ala	synonymous_variant	LOW	34	0	0.031	39	8	0.235	2.22712
Aplan_7298_NR_1000nM_C1_vs_Aplan_7298_NR_Parent	chr17	35024865	35024865	G	C	Vwa7	c.2337G>C	p.Leu779Leu	synonymous_variant	LOW	53	0	0.021	52	12	0.228	3.97573
Aplan_7298_NR_1000nM_C1_vs_Aplan_7298_NR_Parent	chr17	35204089	35204089	C	G	Lta	c.257G>C	p.Arg86Pro	missense_variant	MODERATE	67	0	0.016	77	20	0.267	5.65011
Aplan_7298_NR_1000nM_C1_vs_Aplan_7298_NR_Parent	chr17	35263642	35263642	G	C	H2-D1	c.337G>C	p.Ala113Pro	missense_variant	MODERATE	115	0	0.00958	102	25	0.234	5.77889
Aplan_7298_NR_1000nM_C1_vs_Aplan_7298_NR_Parent	chr17	35685344	35685344	G	A	Ddr1	c.1825C>T	p.Arg609Cys	missense_variant	MODERATE	52	0	0.021	52	18	0.292	5.89098
Aplan_7298_NR_1000nM_C1_vs_Aplan_7298_NR_Parent	chr17	35884071	35884071	C	G	Dhx16	c.1489C>G	p.Arg497Gly	missense_variant	MODERATE	154	0	0.007518	109	32	0.307	6.41831
Aplan_7298_NR_1000nM_C1_vs_Aplan_7298_NR_Parent	chr17	35923357	35923357	G	C	Ppp1r10	c.39G>C	p.Lys13Asn	missense_variant	MODERATE	46	0	0.024	49	9	0.204	2.57087
Aplan_7298_NR_1000nM_C1_vs_Aplan_7298_NR_Parent	chr17	37010120	37010120	C	G	Zfp57	c.865C>G	p.Arg289Gly	missense_variant	MODERATE	124	0	0.008883	152	46	0.297	5.92915
Aplan_7298_NR_1000nM_C1_vs_Aplan_7298_NR_Parent	chr17	45516527	45516527	C	G	Aars2	c.1494C>G	p.His498Gln	missense_variant	MODERATE	37	0	0.029	36	15	0.441	5.41696
Aplan_7298_NR_1000nM_C1_vs_Aplan_7298_NR_Parent	chr17	45539901	45539901	C	T	Tcte1	c.1102C>T	p.Arg368Cys	missense_variant	MODERATE	52	0	0.02	33	11	0.357	5.04233
Aplan_7298_NR_1000nM_C1_vs_Aplan_7298_NR_Parent	chr17	45545700	45545700	G	C	Tmem151b	c.813C>G	p.Asn271Lys	missense_variant	MODERATE	64	0	0.018	46	9	0.217	3.62476
Aplan_7298_NR_1000nM_C1_vs_Aplan_7298_NR_Parent	chr17	45560459	45560459	C	G	Nfkbie	c.841C>G	p.Arg281Gly	missense_variant	MODERATE	43	0	0.026	29	5	0.206	2.07121
Aplan_7298_NR_1000nM_C1_vs_Aplan_7298_NR_Parent	chr17	46540328	46540328	G	C	Cul9	c.1165C>G	p.Arg389Gly	missense_variant	MODERATE	72	0	0.016	46	9	0.22	3.90931
Aplan_7298_NR_1000nM_C1_vs_Aplan_7298_NR_Parent	chr17	46640632	46640632	C	G	Klc4	c.562G>C	p.Gly188Arg	missense_variant	MODERATE	29	0	0.038	37	10	0.306	2.75797
Aplan_7298_NR_1000nM_C1_vs_Aplan_7298_NR_Parent	chr17	46652770	46652770	G	C	Cul7	c.772G>C	p.Val258Leu	missense_variant	MODERATE	70	0	0.016	62	19	0.295	6.98325
Aplan_7298_NR_1000nM_C1_vs_Aplan_7298_NR_Parent	chr17	46657755	46657755	C	G	Cul7	c.2549C>G	p.Ala850Gly	missense_variant	MODERATE	53	0	0.019	49	11	0.24	3.78636
Aplan_7298_NR_1000nM_C1_vs_Aplan_7298_NR_Parent	chr17	46657786	46657786	C	G	Cul7	c.2580C>G	p.Arg860Arg	synonymous_variant	LOW	43	0	0.023	47	12	0.276	3.60771
Aplan_7298_NR_1000nM_C1_vs_Aplan_7298_NR_Parent	chr17	46657991	46657991	C	G	Cul7	c.2661C>G	p.Cys887Trp	missense_variant	MODERATE	42	0	0.025	62	12	0.21	2.85091
Aplan_7298_NR_1000nM_C1_vs_Aplan_7298_NR_Parent	chr17	48423126	48423126	C	G	Apobec2	c.511G>C	p.Glu171Gln	missense_variant	MODERATE	83	0	0.014	81	15	0.213	4.90869
Aplan_7298_NR_1000nM_C1_vs_Aplan_7298_NR_Parent	chr17	55794665	55794665	C	G	Adgre4	c.584C>G	p.Thr195Arg	missense_variant	MODERATE	77	0	0.014	98	23	0.247	5.9802
Aplan_7298_NR_1000nM_C1_vs_Aplan_7298_NR_Parent	chr17	55995377	55995377	G	C	Fsd1	c.820G>C	p.Gly274Arg	missense_variant	MODERATE	159	0	0.007588	134	31	0.25	5.88298
Aplan_7298_NR_1000nM_C1_vs_Aplan_7298_NR_Parent	chr17	56130005	56130005	C	G	Sema6b	c.653G>C	p.Arg218Pro	missense_variant	MODERATE	44	0	0.026	43	11	0.268	3.68742
Aplan_7298_NR_1000nM_C1_vs_Aplan_7298_NR_Parent	chr17	56423281	56423281	C	G	Ptprs	c.3592G>C	p.Gly1198Arg	missense_variant	MODERATE	80	0	0.015	50	15	0.268	6.87571
Aplan_7298_NR_1000nM_C1_vs_Aplan_7298_NR_Parent	chr17	56426449	56426449	G	C	Ptprs	c.2366C>G	p.Ala789Gly	missense_variant	MODERATE	37	0	0.028	36	11	0.333	3.77253
Aplan_7298_NR_1000nM_C1_vs_Aplan_7298_NR_Parent	chr17	56620346	56620346	G	C	Lonp1	c.906C>G	p.Ser302Ser	synonymous_variant	LOW	38	0	0.026	38	11	0.307	3.37653
Aplan_7298_NR_1000nM_C1_vs_Aplan_7298_NR_Parent	chr17	56769655	56769655	C	G	Dus3l	c.1834C>G	p.Arg612Gly	missense_variant	MODERATE	89	0	0.012	83	22	0.286	6.09744
Aplan_7298_NR_1000nM_C1_vs_Aplan_7298_NR_Parent	chr17	56803734	56803734	G	C	Rfx2	c.251C>G	p.Ala84Gly	missense_variant	MODERATE	43	0	0.025	58	16	0.294	4.25444
Aplan_7298_NR_1000nM_C1_vs_Aplan_7298_NR_Parent	chr17	57075427	57075427	G	C	Dennd1c	c.238C>G	p.Arg80Gly	missense_variant	MODERATE	53	0	0.021	50	12	0.245	4.10023
Aplan_7298_NR_1000nM_C1_vs_Aplan_7298_NR_Parent	chr17	57255432	57255432	C	G	Trip10	c.949C>G	p.Arg317Gly	missense_variant	MODERATE	35	0	0.03	42	11	0.25	3.15299
Aplan_7298_NR_1000nM_C1_vs_Aplan_7298_NR_Parent	chr17	59006610	59006610	G	C	Nudt12	c.972C>G	p.Val324Val	synonymous_variant	LOW	73	0	0.017	106	25	0.242	6.11129
Aplan_7298_NR_1000nM_C1_vs_Aplan_7298_NR_Parent	chr17	64133512	64133512	G	C	Fer	c.2123G>C	p.Arg708Pro	missense_variant	MODERATE	65	0	0.018	69	21	0.346	5.88354
Aplan_7298_NR_1000nM_C1_vs_Aplan_7298_NR_Parent	chr17	64308660	64308660	G	C	Pja2	c.1239C>G	p.Cys413Trp	missense_variant	MODERATE	112	0	0.009371	139	36	0.273	6.07144
Aplan_7298_NR_1000nM_C1_vs_Aplan_7298_NR_Parent	chr17	67816998	67816998	C	G	Lama1	c.8422-5C>G		splice_region_variant&intron_variant	LOW	28	0	0.039	21	8	0.355	3.34561
Aplan_7298_NR_1000nM_C1_vs_Aplan_7298_NR_Parent	chr17	71101266	71101266	C	G	Myom1	c.3671C>G	p.Pro1224Arg	missense_variant&splice_region_variant	MODERATE	67	0	0.016	107	23	0.218	5.01229
Aplan_7298_NR_1000nM_C1_vs_Aplan_7298_NR_Parent	chr17	71729299	71729299	G	C	Fam179a	c.2783G>C	p.Arg928Pro	missense_variant	MODERATE	22	0	0.046	30	8	0.277	1.82387
Aplan_7298_NR_1000nM_C1_vs_Aplan_7298_NR_Parent	chr17	75274042	75274042	G	C	Ltbp1	c.2143+8G>C		splice_region_variant&intron_variant	LOW	27	0	0.041	42	10	0.226	2.30706
Aplan_7298_NR_1000nM_C1_vs_Aplan_7298_NR_Parent	chr17	79713372	79713372	C	G	Cyp1b1	c.940G>C	p.Gly314Arg	missense_variant	MODERATE	35	0	0.033	26	5	0.238	1.95636
Aplan_7298_NR_1000nM_C1_vs_Aplan_7298_NR_Parent	chr17	79713515	79713515	C	G	Cyp1b1	c.797G>C	p.Arg266Pro	missense_variant	MODERATE	33	0	0.03	27	10	0.361	3.95119
Aplan_7298_NR_1000nM_C1_vs_Aplan_7298_NR_Parent	chr17	79852830	79852830	G	C	Atl2	c.1327C>G	p.Arg443Gly	missense_variant	MODERATE	101	0	0.011	125	32	0.256	5.88704
Aplan_7298_NR_1000nM_C1_vs_Aplan_7298_NR_Parent	chr17	80373055	80373055	C	G	Arhgef33	c.1623C>G	p.Pro541Pro	synonymous_variant	LOW	21	0	0.048	18	7	0.421	2.68423
Aplan_7298_NR_1000nM_C1_vs_Aplan_7298_NR_Parent	chr17	83588106	83588106	G	C	Kcng3	c.930C>G	p.Gly310Gly	synonymous_variant	LOW	83	0	0.013	60	19	0.322	6.42634
Aplan_7298_NR_1000nM_C1_vs_Aplan_7298_NR_Parent	chr17	84676296	84676296	C	G	Abcg5	c.314G>C	p.Arg105Pro	missense_variant	MODERATE	22	0	0.043	19	5	0.249	1.80921
Aplan_7298_NR_1000nM_C1_vs_Aplan_7298_NR_Parent	chr17	84751228	84751228	C	G	Lrpprc	c.2203G>C	p.Glu735Gln	missense_variant	MODERATE	66	0	0.017	98	27	0.278	6.40372
Aplan_7298_NR_1000nM_C1_vs_Aplan_7298_NR_Parent	chr17	87346660	87346660	C	T	Ttc7	c.1764C>T	p.Asp588Asp	synonymous_variant	LOW	48	0	0.024	50	16	0.315	5.12069
Aplan_7298_NR_1000nM_C1_vs_Aplan_7298_NR_Parent	chr17	87379923	87379923	C	G	Ttc7	c.2430C>G	p.Ser810Arg	missense_variant	MODERATE	34	0	0.03	24	7	0.282	2.93889
Aplan_7298_NR_1000nM_C1_vs_Aplan_7298_NR_Parent	chr17	87379980	87379980	C	G	Ttc7	c.2487C>G	p.Asn829Lys	missense_variant	MODERATE	26	0	0.039	21	6	0.302	2.29639
Aplan_7298_NR_1000nM_C1_vs_Aplan_7298_NR_Parent	chr17	87422583	87422583	C	G	1700011E24Rik	c.333G>C	p.Lys111Asn	missense_variant	MODERATE	32	0	0.032	36	10	0.299	2.96014
Aplan_7298_NR_1000nM_C1_vs_Aplan_7298_NR_Parent	chr18	5213634	5213634	C	G	Zfp438	c.1323G>C	p.Thr441Thr	synonymous_variant	LOW	165	0	0.007137	153	31	0.205	6.31783
Aplan_7298_NR_1000nM_C1_vs_Aplan_7298_NR_Parent	chr18	6452255	6452255	G	C	Epc1	c.953C>G	p.Ser318Trp	missense_variant	MODERATE	40	0	0.026	62	13	0.22	2.85573
Aplan_7298_NR_1000nM_C1_vs_Aplan_7298_NR_Parent	chr18	10533074	10533074	C	G	Greb1l	c.2967C>G	p.Ile989Met	missense_variant	MODERATE	8	0	0.1	36	8	0.257	0.501031
Aplan_7298_NR_1000nM_C1_vs_Aplan_7298_NR_Parent	chr18	11734475	11734475	G	C	Rbbp8	c.2276-1G>C		splice_acceptor_variant&intron_variant	HIGH	82	0	0.016	90	18	0.2	5.39208
Aplan_7298_NR_1000nM_C1_vs_Aplan_7298_NR_Parent	chr18	15393572	15393572	C	G	Aqp4	c.851G>C	p.Arg284Pro	missense_variant	MODERATE	189	0	0.006379	162	45	0.3	5.81405
Aplan_7298_NR_1000nM_C1_vs_Aplan_7298_NR_Parent	chr18	20094840	20094840	C	G	Dsc1	c.1458G>C	p.Ala486Ala	synonymous_variant	LOW	163	1	0.007215	190	57	0.291	5.96057
Aplan_7298_NR_1000nM_C1_vs_Aplan_7298_NR_Parent	chr18	20466522	20466522	G	C	Dsg4	c.2194G>C	p.Val732Leu	missense_variant	MODERATE	24	0	0.039	25	5	0.208	1.29971
Aplan_7298_NR_1000nM_C1_vs_Aplan_7298_NR_Parent	chr18	20601339	20601339	C	G	Dsg2	c.2373C>G	p.Asp791Glu	missense_variant	MODERATE	98	0	0.012	58	13	0.226	5.99407
Aplan_7298_NR_1000nM_C1_vs_Aplan_7298_NR_Parent	chr18	24582362	24582362	G	C	Slc39a6	c.2100C>G	p.Phe700Leu	missense_variant	MODERATE	59	0	0.019	74	25	0.319	6.04225
Aplan_7298_NR_1000nM_C1_vs_Aplan_7298_NR_Parent	chr18	31947206	31947206	G	C	Gpr17	c.803C>G	p.Ser268Trp	missense_variant	MODERATE	48	0	0.021	43	8	0.2	2.76796
Aplan_7298_NR_1000nM_C1_vs_Aplan_7298_NR_Parent	chr18	32015534	32015534	C	G	Myo7b	c.30G>C	p.Val10Val	synonymous_variant	LOW	191	0	0.006186	168	41	0.245	5.88767
Aplan_7298_NR_1000nM_C1_vs_Aplan_7298_NR_Parent	chr18	35647733	35647733	G	C	Mzb1	c.411-7C>G		splice_region_variant&intron_variant	LOW	53	0	0.019	70	15	0.215	3.89353
Aplan_7298_NR_1000nM_C1_vs_Aplan_7298_NR_Parent	chr18	35654465	35654465	G	C	Prob1	c.735C>G	p.Ala245Ala	synonymous_variant	LOW	47	0	0.021	44	9	0.221	3.04358
Aplan_7298_NR_1000nM_C1_vs_Aplan_7298_NR_Parent	chr18	35683260	35683260	G	C	Dnajc18	c.624C>G	p.His208Gln	missense_variant	MODERATE	112	0	0.01	128	41	0.343	6.21112
Aplan_7298_NR_1000nM_C1_vs_Aplan_7298_NR_Parent	chr18	35715443	35715443	C	G	Ecscr	c.530G>C	p.Arg177Pro	missense_variant	MODERATE	115	0	0.011	80	25	0.308	6.06447
Aplan_7298_NR_1000nM_C1_vs_Aplan_7298_NR_Parent	chr18	37011307	37011307	G	C	Pcdha11	c.450G>C	p.Ser150Ser	synonymous_variant	LOW	146	0	0.007141	184	41	0.225	6.01895
Aplan_7298_NR_1000nM_C1_vs_Aplan_7298_NR_Parent	chr18	37022005	37022005	G	C	Pcdha12	c.1776G>C	p.Ala592Ala	synonymous_variant	LOW	81	0	0.013	101	34	0.337	5.76047
Aplan_7298_NR_1000nM_C1_vs_Aplan_7298_NR_Parent	chr18	37515423	37515423	G	C	Pcdhb21	c.1604G>C	p.Arg535Pro	missense_variant	MODERATE	273	0	0.004017	278	60	0.218	6.03463
Aplan_7298_NR_1000nM_C1_vs_Aplan_7298_NR_Parent	chr18	37807002	37807002	C	G	Pcdhgc3	c.455C>G	p.Thr152Arg	missense_variant	MODERATE	115	1	0.009624	102	26	0.259	6.43515
Aplan_7298_NR_1000nM_C1_vs_Aplan_7298_NR_Parent	chr18	38330555	38330555	G	C	Gnpda1	c.700C>G	p.Arg234Gly	missense_variant	MODERATE	53	0	0.02	62	12	0.213	3.40498
Aplan_7298_NR_1000nM_C1_vs_Aplan_7298_NR_Parent	chr18	58598671	58598671	C	A	Slc27a6	c.1092C>A	p.Thr364Thr	synonymous_variant	LOW	58	0	0.021	61	12	0.211	3.55661
Aplan_7298_NR_1000nM_C1_vs_Aplan_7298_NR_Parent	chr18	62937373	62937373	C	G	Apcdd1	c.710C>G	p.Thr237Arg	missense_variant	MODERATE	36	0	0.029	48	13	0.286	3.38936
Aplan_7298_NR_1000nM_C1_vs_Aplan_7298_NR_Parent	chr18	62952008	62952008	C	G	Apcdd1	c.1275C>G	p.Phe425Leu	missense_variant	MODERATE	76	0	0.014	79	18	0.227	5.57114
Aplan_7298_NR_1000nM_C1_vs_Aplan_7298_NR_Parent	chr18	62952032	62952032	C	G	Apcdd1	c.1299C>G	p.Gly433Gly	synonymous_variant	LOW	71	0	0.015	79	20	0.243	6.10116
Aplan_7298_NR_1000nM_C1_vs_Aplan_7298_NR_Parent	chr18	65749726	65749726	G	C	Oacyl	c.1891G>C	p.Gly631Arg	missense_variant	MODERATE	52	0	0.022	59	15	0.235	4.48621
Aplan_7298_NR_1000nM_C1_vs_Aplan_7298_NR_Parent	chr18	73930896	73930896	G	C	Mapk4	c.1254C>G	p.Ala418Ala	synonymous_variant	LOW	84	0	0.013	90	20	0.225	6.14145
Aplan_7298_NR_1000nM_C1_vs_Aplan_7298_NR_Parent	chr18	76956922	76956922	C	G	Hdhd2	c.394C>G	p.Arg132Gly	missense_variant&splice_region_variant	MODERATE	36	0	0.03	27	7	0.269	2.79451
Aplan_7298_NR_1000nM_C1_vs_Aplan_7298_NR_Parent	chr18	77760903	77760903	G	C	Haus1	c.600+4C>G		splice_region_variant&intron_variant	LOW	30	0	0.033	41	7	0.205	1.73434
Aplan_7298_NR_1000nM_C1_vs_Aplan_7298_NR_Parent	chr18	80129336	80129336	G	C	Adnp2	c.1857C>G	p.Pro619Pro	synonymous_variant	LOW	58	0	0.02	65	18	0.282	5.50924
Aplan_7298_NR_1000nM_C1_vs_Aplan_7298_NR_Parent	chr19	3987163	3987163	C	G	Acy3	c.94C>G	p.Arg32Gly	missense_variant	MODERATE	80	0	0.014	95	28	0.29	6.39791
Aplan_7298_NR_1000nM_C1_vs_Aplan_7298_NR_Parent	chr19	4103269	4103269	G	C	Pitpnm1	c.424G>C	p.Asp142His	missense_variant	MODERATE	125	0	0.009357	77	21	0.257	6.62122
Aplan_7298_NR_1000nM_C1_vs_Aplan_7298_NR_Parent	chr19	4103378	4103378	G	C	Pitpnm1	c.533G>C	p.Arg178Pro	missense_variant	MODERATE	95	1	0.012	90	24	0.265	6.39946
Aplan_7298_NR_1000nM_C1_vs_Aplan_7298_NR_Parent	chr19	4105065	4105065	G	A	Pitpnm1	c.892G>A	p.Asp298Asn	missense_variant	MODERATE	50	0	0.02	54	14	0.265	4.27894
Aplan_7298_NR_1000nM_C1_vs_Aplan_7298_NR_Parent	chr19	4108841	4108841	G	C	Pitpnm1	c.2117G>C	p.Arg706Pro	missense_variant	MODERATE	48	0	0.021	58	17	0.303	4.76864
Aplan_7298_NR_1000nM_C1_vs_Aplan_7298_NR_Parent	chr19	4108849	4108849	G	C	Pitpnm1	c.2125G>C	p.Val709Leu	missense_variant	MODERATE	47	0	0.021	58	17	0.304	4.75601
Aplan_7298_NR_1000nM_C1_vs_Aplan_7298_NR_Parent	chr19	4111139	4111139	G	C	Pitpnm1	c.2689G>C	p.Ala897Pro	missense_variant	MODERATE	55	0	0.023	26	6	0.24	3.14911
Aplan_7298_NR_1000nM_C1_vs_Aplan_7298_NR_Parent	chr19	4602234	4602234	C	A	Pcx	c.349C>A	p.Pro117Thr	missense_variant	MODERATE	58	0	0.018	57	14	0.254	4.66522
Aplan_7298_NR_1000nM_C1_vs_Aplan_7298_NR_Parent	chr19	4803426	4803426	C	G	Rbm14	c.927G>C	p.Gln309His	missense_variant	MODERATE	53	0	0.02	50	12	0.239	4.10023
Aplan_7298_NR_1000nM_C1_vs_Aplan_7298_NR_Parent	chr19	4840411	4840411	C	G	Ccdc87	c.930C>G	p.Gly310Gly	synonymous_variant	LOW	78	0	0.014	80	27	0.329	6.06721
Aplan_7298_NR_1000nM_C1_vs_Aplan_7298_NR_Parent	chr19	4840645	4840646	GC	TG	Ccdc87	c.1164_1165delGCinsTG	p.Arg389Gly	missense_variant	MODERATE	67	0	0.016	78	22	0.316	6.38024
Aplan_7298_NR_1000nM_C1_vs_Aplan_7298_NR_Parent	chr19	5046481	5046481	C	G	Brms1	c.318C>G	p.Gly106Gly	synonymous_variant	LOW	62	0	0.017	65	20	0.289	6.42959
Aplan_7298_NR_1000nM_C1_vs_Aplan_7298_NR_Parent	chr19	5307561	5307561	G	C	Gal3st3	c.963G>C	p.Ala321Ala	synonymous_variant	LOW	30	0	0.032	24	7	0.292	2.70901
Aplan_7298_NR_1000nM_C1_vs_Aplan_7298_NR_Parent	chr19	5608917	5608917	G	C	Kat5	c.326C>G	p.Pro109Arg	missense_variant	MODERATE	80	0	0.014	70	17	0.214	6.13702
Aplan_7298_NR_1000nM_C1_vs_Aplan_7298_NR_Parent	chr19	5665742	5665742	C	G	Pcnx3	c.5559G>C	p.Pro1853Pro	synonymous_variant	LOW	64	0	0.017	48	12	0.28	4.80208
Aplan_7298_NR_1000nM_C1_vs_Aplan_7298_NR_Parent	chr19	5700644	5700644	C	G	Map3k11	c.1889C>G	p.Thr630Arg	missense_variant	MODERATE	52	0	0.022	59	12	0.231	3.4734
Aplan_7298_NR_1000nM_C1_vs_Aplan_7298_NR_Parent	chr19	5716444	5716444	C	G	Ehbp1l1	c.3870G>C	p.Ala1290Ala	synonymous_variant	LOW	35	0	0.03	29	7	0.259	2.5999
Aplan_7298_NR_1000nM_C1_vs_Aplan_7298_NR_Parent	chr19	5731678	5731678	G	C	Sssca1	c.17C>G	p.Ala6Gly	missense_variant&splice_region_variant	MODERATE	104	1	0.011	101	26	0.275	5.83838
Aplan_7298_NR_1000nM_C1_vs_Aplan_7298_NR_Parent	chr19	5746059	5746059	C	G	Ltbp3	c.794C>G	p.Pro265Arg	missense_variant	MODERATE	34	0	0.029	26	5	0.213	1.91922
Aplan_7298_NR_1000nM_C1_vs_Aplan_7298_NR_Parent	chr19	6008721	6008721	C	G	Capn1	c.884G>C	p.Arg295Pro	missense_variant	MODERATE	68	0	0.017	44	11	0.256	4.83522
Aplan_7298_NR_1000nM_C1_vs_Aplan_7298_NR_Parent	chr19	6114452	6114452	C	G	Naaladl1	c.1625C>G	p.Ser542Trp	missense_variant	MODERATE	106	0	0.012	110	26	0.22	5.9513
Aplan_7298_NR_1000nM_C1_vs_Aplan_7298_NR_Parent	chr19	6118269	6118269	C	G	Sac3d1	c.318G>C	p.Val106Val	synonymous_variant	LOW	41	0	0.024	42	12	0.303	3.70834
Aplan_7298_NR_1000nM_C1_vs_Aplan_7298_NR_Parent	chr19	6911871	6911871	C	G	Esrra	c.1149G>C	p.Thr383Thr	synonymous_variant	LOW	33	0	0.031	31	9	0.3	3.13548
Aplan_7298_NR_1000nM_C1_vs_Aplan_7298_NR_Parent	chr19	6913918	6913918	C	G	Esrra	c.473G>C	p.Arg158Pro	missense_variant	MODERATE	70	0	0.016	57	14	0.25	5.30382
Aplan_7298_NR_1000nM_C1_vs_Aplan_7298_NR_Parent	chr19	6926068	6926068	C	G	Kcnk4	c.1112G>C	p.Arg371Pro	missense_variant	MODERATE	65	0	0.016	56	15	0.258	5.52145
Aplan_7298_NR_1000nM_C1_vs_Aplan_7298_NR_Parent	chr19	6928122	6928122	C	G	Kcnk4	c.349G>C	p.Gly117Arg	missense_variant	MODERATE	49	0	0.022	51	12	0.224	3.62166
Aplan_7298_NR_1000nM_C1_vs_Aplan_7298_NR_Parent	chr19	6940595	6940595	C	G	Gpr137	c.245G>C	p.Arg82Pro	missense_variant	MODERATE	71	0	0.014	68	19	0.294	5.9926
Aplan_7298_NR_1000nM_C1_vs_Aplan_7298_NR_Parent	chr19	6966164	6966164	G	C	Plcb3	c.366C>G	p.Ala122Ala	synonymous_variant	LOW	108	0	0.01	99	21	0.222	6.32769
Aplan_7298_NR_1000nM_C1_vs_Aplan_7298_NR_Parent	chr19	6993736	6993736	C	G	Nudt22	c.600G>C	p.Leu200Phe	missense_variant	MODERATE	34	0	0.029	41	9	0.225	2.49389
Aplan_7298_NR_1000nM_C1_vs_Aplan_7298_NR_Parent	chr19	7096087	7096087	C	G	Flrt1	c.1094G>C	p.Gly365Ala	missense_variant	MODERATE	41	0	0.027	34	12	0.382	4.67798
Aplan_7298_NR_1000nM_C1_vs_Aplan_7298_NR_Parent	chr19	8619426	8619426	G	C	Slc22a6	c.567G>C	p.Ser189Ser	synonymous_variant	LOW	82	0	0.016	79	20	0.246	6.26838
Aplan_7298_NR_1000nM_C1_vs_Aplan_7298_NR_Parent	chr19	10221348	10221348	C	G	Myrf	c.1141G>C	p.Ala381Pro	missense_variant	MODERATE	57	0	0.019	56	15	0.274	5.04673
Aplan_7298_NR_1000nM_C1_vs_Aplan_7298_NR_Parent	chr19	10725840	10725840	C	G	Cd5	c.453G>C	p.Pro151Pro	synonymous_variant	LOW	68	0	0.017	45	11	0.244	4.75796
Aplan_7298_NR_1000nM_C1_vs_Aplan_7298_NR_Parent	chr19	13411045	13411045	C	CA	Olfr1469	c.476dupA	p.His159fs	frameshift_variant	HIGH	161	0	0.006557	174	44	0.254	5.89916
Aplan_7298_NR_1000nM_C1_vs_Aplan_7298_NR_Parent	chr19	15917250	15917250	C	T	Psat1	c.398-1G>A		splice_acceptor_variant&intron_variant	HIGH	68	1	0.033	66	13	0.225	3.33198
Aplan_7298_NR_1000nM_C1_vs_Aplan_7298_NR_Parent	chr19	15917253	15917253	T	TGTAACTTCCAAGTTTAGGGTGGACAATGTTCACCGTTC	Psat1	c.398-5_398-4insGAACGGTGAACATTGTCCACCCTAAACTTGGAAGTTAC		splice_region_variant&intron_variant	LOW	61	1	0.035	59	13	0.23	3.37437
Aplan_7298_NR_1000nM_C1_vs_Aplan_7298_NR_Parent	chr19	20816197	20816197	G	C	Tmc1	c.1599C>G	p.Tyr533*	stop_gained	HIGH	45	0	0.025	60	20	0.343	5.33009
Aplan_7298_NR_1000nM_C1_vs_Aplan_7298_NR_Parent	chr19	30004479	30004479	G	C	Trpd52l3	c.633G>C	p.Gly211Gly	synonymous_variant	LOW	83	0	0.013	77	16	0.222	5.47273
Aplan_7298_NR_1000nM_C1_vs_Aplan_7298_NR_Parent	chr19	30086324	30086324	C	A	Uhrf2	c.1686C>A	p.Pro562Pro	synonymous_variant	LOW	24	0	0.041	46	15	0.341	2.87469
Aplan_7298_NR_1000nM_C1_vs_Aplan_7298_NR_Parent	chr19	32638322	32638322	G	A	Papss2	c.453G>A	p.Ala151Ala	synonymous_variant	LOW	57	0	0.02	52	11	0.224	3.80294
Aplan_7298_NR_1000nM_C1_vs_Aplan_7298_NR_Parent	chr19	34474428	34474428	G	C	Ch25h	c.699C>G	p.Tyr233*	stop_gained	HIGH	53	0	0.022	52	11	0.227	3.61539
Aplan_7298_NR_1000nM_C1_vs_Aplan_7298_NR_Parent	chr19	34648512	34648512	G	A	Ifit1	c.1047G>A	p.Glu349Glu	synonymous_variant	LOW	75	0	0.014	84	25	0.312	6.00894
Aplan_7298_NR_1000nM_C1_vs_Aplan_7298_NR_Parent	chr19	37945637	37945637	C	G	Myof	c.2862G>C	p.Thr954Thr	synonymous_variant	LOW	87	0	0.013	70	16	0.245	6.07587
Aplan_7298_NR_1000nM_C1_vs_Aplan_7298_NR_Parent	chr19	39851103	39851103	C	G	Cyp2c69	c.1075G>C	p.Val359Leu	missense_variant	MODERATE	174	0	0.006526	224	66	0.294	5.91865
Aplan_7298_NR_1000nM_C1_vs_Aplan_7298_NR_Parent	chr19	41088789	41088789	C	G	Tll2	c.2537G>C	p.Arg846Pro	missense_variant	MODERATE	38	0	0.027	29	9	0.321	3.63036
Aplan_7298_NR_1000nM_C1_vs_Aplan_7298_NR_Parent	chr19	41376185	41376185	C	G	Pik3ap1	c.94G>C	p.Val32Leu	missense_variant	MODERATE	40	0	0.026	30	10	0.345	4.12069
Aplan_7298_NR_1000nM_C1_vs_Aplan_7298_NR_Parent	chr19	41873838	41873838	C	G	Rrp12	c.2705G>C	p.Arg902Pro	missense_variant	MODERATE	31	0	0.035	31	10	0.355	3.08354
Aplan_7298_NR_1000nM_C1_vs_Aplan_7298_NR_Parent	chr19	42147838	42147838	G	C	Marveld1	c.190G>C	p.Val64Leu	missense_variant	MODERATE	41	0	0.026	19	6	0.368	3.26604
Aplan_7298_NR_1000nM_C1_vs_Aplan_7298_NR_Parent	chr19	45795673	45795673	C	G	Kcnip2	c.255G>C	p.Thr85Thr	synonymous_variant	LOW	59	0	0.021	40	13	0.351	5.71104
Aplan_7298_NR_1000nM_C1_vs_Aplan_7298_NR_Parent	chr19	46005940	46005940	G	C	Hps6	c.2315G>C	p.Arg772Pro	missense_variant	MODERATE	75	0	0.014	73	15	0.224	4.95608
Aplan_7298_NR_1000nM_C1_vs_Aplan_7298_NR_Parent	chr19	46308990	46308990	G	C	Nfkb2	c.1243G>C	p.Asp415His	missense_variant	MODERATE	39	0	0.028	38	10	0.263	3.36559
Aplan_7298_NR_1000nM_C1_vs_Aplan_7298_NR_Parent	chr19	46654129	46654129	C	G	Wbp1l	c.568C>G	p.Pro190Ala	missense_variant	MODERATE	71	0	0.015	72	14	0.22	4.21677
Aplan_7298_NR_1000nM_C1_vs_Aplan_7298_NR_Parent	chr19	46708130	46708130	C	G	As3mt	c.106C>G	p.Arg36Gly	missense_variant	MODERATE	90	0	0.013	93	29	0.307	5.95644
Aplan_7298_NR_1000nM_C1_vs_Aplan_7298_NR_Parent	chr19	53832666	53832666	C	G	Rbm20	c.1551C>G	p.Gly517Gly	synonymous_variant	LOW	29	0	0.038	35	9	0.265	2.53352
Aplan_7298_NR_1000nM_C1_vs_Aplan_7298_NR_Parent	chrX	5468847	5468847	G	C	Mycs	c.178C>G	p.Arg60Gly	missense_variant	MODERATE	34	0	0.031	29	12	0.434	4.71112
Aplan_7298_NR_1000nM_C1_vs_Aplan_7298_NR_Parent	chrX	7609008	7609008	G	C	Cacna1f	c.248G>C	p.Arg83Pro	missense_variant	MODERATE	46	0	0.025	24	16	0.674	6.07416
Aplan_7298_NR_1000nM_C1_vs_Aplan_7298_NR_Parent	chrX	7733362	7733362	G	A	Ccdc120	c.1684C>T	p.Arg562Trp	missense_variant	MODERATE	27	0	0.035	29	16	0.534	5.71165
Aplan_7298_NR_1000nM_C1_vs_Aplan_7298_NR_Parent	chrX	7765613	7765613	C	G	Tfe3	c.223C>G	p.Arg75Gly	missense_variant	MODERATE	54	0	0.021	56	29	0.488	6.12757
Aplan_7298_NR_1000nM_C1_vs_Aplan_7298_NR_Parent	chrX	36328990	36328990	C	G	Lonrf3	c.411C>G	p.Ala137Ala	synonymous_variant	LOW	8	0	0.102	12	5	0.468	1.26205
Aplan_7298_NR_1000nM_C1_vs_Aplan_7298_NR_Parent	chrX	51680019	51680019	C	G	Hs6st2	c.818G>C	p.Arg273Thr	missense_variant	MODERATE	15	0	0.063	23	13	0.565	3.55751
Aplan_7298_NR_1000nM_C1_vs_Aplan_7298_NR_Parent	chrX	68715596	68715596	C	T	Fmr1	c.1766C>T	p.Thr589Met	missense_variant	MODERATE	24	0	0.049	11	5	0.5	2.84675
Aplan_7298_NR_1000nM_C1_vs_Aplan_7298_NR_Parent	chrX	72837003	72837003	C	G	Gabrq	c.1101C>G	p.Pro367Pro	synonymous_variant	LOW	23	0	0.043	27	14	0.539	4.65249
Aplan_7298_NR_1000nM_C1_vs_Aplan_7298_NR_Parent	chrX	73712475	73712475	G	C	Bcap31	c.163C>G	p.Leu55Val	missense_variant	MODERATE	56	0	0.02	69	30	0.468	5.85476
Aplan_7298_NR_1000nM_C1_vs_Aplan_7298_NR_Parent	chrX	73859482	73859482	C	G	L1cam	c.2249G>C	p.Arg750Pro	missense_variant	MODERATE	25	0	0.04	30	15	0.479	4.60999
Aplan_7298_NR_1000nM_C1_vs_Aplan_7298_NR_Parent	chrX	73927834	73927834	C	T	Renbp	c.927G>A	p.Ala309Ala	synonymous_variant	LOW	24	0	0.045	24	8	0.409	2.40915
Aplan_7298_NR_1000nM_C1_vs_Aplan_7298_NR_Parent	chrX	83803468	83803468	G	A	Dmd	c.3118G>A	p.Glu1040Lys	missense_variant	MODERATE	17	0	0.063	22	10	0.435	2.72377
Aplan_7298_NR_1000nM_C1_vs_Aplan_7298_NR_Parent	chrX	91932200	91932200	G	C	Gm5071	c.781C>G	p.Arg261Gly	missense_variant	MODERATE	48	0	0.023	51	28	0.592	6.56868
Aplan_7298_NR_1000nM_C1_vs_Aplan_7298_NR_Parent	chrX	96714236	96714236	G	C	Gpr165	c.240G>C	p.Ser80Ser	synonymous_variant	LOW	17	0	0.051	20	6	0.333	1.65766
Aplan_7298_NR_1000nM_C1_vs_Aplan_7298_NR_Parent	chrX	101384591	101384591	C	G	Gjb1	c.424C>G	p.Arg142Gly	missense_variant	MODERATE	40	0	0.026	28	11	0.414	4.85364
Aplan_7298_NR_1000nM_C1_vs_Aplan_7298_NR_Parent	chrX	102079529	102079529	C	G	Nhsl2	c.2937C>G	p.Ile979Met	missense_variant	MODERATE	26	0	0.042	40	22	0.565	5.84082
Aplan_7298_NR_1000nM_C1_vs_Aplan_7298_NR_Parent	chrX	111123093	111123093	C	G	Cylc1	c.1142C>G	p.Thr381Arg	missense_variant	MODERATE	12	0	0.091	21	6	0.276	1.18812
Aplan_7298_NR_1000nM_C1_vs_Aplan_7298_NR_Parent	chrX	133686216	133686216	G	C	Pcdh19	c.1049C>G	p.Ser350Trp	missense_variant	MODERATE	44	0	0.024	58	19	0.346	4.97071
Aplan_7298_NR_1000nM_C1_vs_Aplan_7298_NR_Parent	chrX	140432426	140432426	C	G	Frmpd3	c.4139C>G	p.Thr1380Arg	missense_variant	MODERATE	20	0	0.049	21	12	0.562	4.27441
Aplan_7298_NR_1000nM_C1_vs_Aplan_7298_NR_Parent	chrX	153037326	153037326	G	C	Mageh1	c.13C>G	p.Arg5Gly	missense_variant	MODERATE	32	0	0.031	49	23	0.523	5.84518
Aplan_7298_NR_1000nM_C2_vs_Aplan_7298_NR_Parent	chr1	6809282	6809282	G	A	St18	c.1204G>A	p.Ala402Thr	missense_variant	MODERATE	40	0	0.028	31	9	0.312	3.56751
Aplan_7298_NR_1000nM_C2_vs_Aplan_7298_NR_Parent	chr1	20732311	20732311	C	G	Il17a	c.239+4C>G		splice_region_variant&intron_variant	LOW	57	0	0.02	37	8	0.251	3.45988
Aplan_7298_NR_1000nM_C2_vs_Aplan_7298_NR_Parent	chr1	20935635	20935635	G	C	Paqr8	c.1012G>C	p.Ala338Pro	missense_variant	MODERATE	71	0	0.015	55	13	0.255	5.07061
Aplan_7298_NR_1000nM_C2_vs_Aplan_7298_NR_Parent	chr1	32519897	32519897	C	T	Gm9839	c.1103G>A	p.Trp368*	stop_gained	HIGH	229	0	0.004883	178	38	0.222	5.92819
Aplan_7298_NR_1000nM_C2_vs_Aplan_7298_NR_Parent	chr1	36345462	36345462	G	C	Kansl3	c.2016C>G	p.Ala672Ala	synonymous_variant	LOW	36	0	0.03	21	7	0.284	3.35673
Aplan_7298_NR_1000nM_C2_vs_Aplan_7298_NR_Parent	chr1	37261069	37261069	C	G	Cnga3	c.983C>G	p.Ser328Cys	missense_variant	MODERATE	53	0	0.02	59	14	0.263	4.18471
Aplan_7298_NR_1000nM_C2_vs_Aplan_7298_NR_Parent	chr1	37261071	37261071	C	T	Cnga3	c.985C>T	p.Arg329Trp	missense_variant	MODERATE	53	0	0.02	59	14	0.263	4.18471
Aplan_7298_NR_1000nM_C2_vs_Aplan_7298_NR_Parent	chr1	37637952	37637952	C	G	2010300C02Rik	c.148G>C	p.Gly50Arg	missense_variant	MODERATE	54	0	0.022	36	7	0.211	2.95183
Aplan_7298_NR_1000nM_C2_vs_Aplan_7298_NR_Parent	chr1	37835564	37835564	C	G	Tsga10	c.239G>C	p.Arg80Pro	missense_variant	MODERATE	73	0	0.015	38	10	0.291	5.03754
Aplan_7298_NR_1000nM_C2_vs_Aplan_7298_NR_Parent	chr1	40682061	40682061	C	G	Slc9a2	c.188C>G	p.Pro63Arg	missense_variant	MODERATE	18	0	0.059	18	5	0.315	1.34242
Aplan_7298_NR_1000nM_C2_vs_Aplan_7298_NR_Parent	chr1	43033255	43033255	C	G	Gpr45	c.1057C>G	p.Arg353Gly	missense_variant	MODERATE	177	2	0.0067	129	34	0.28	6.01302
Aplan_7298_NR_1000nM_C2_vs_Aplan_7298_NR_Parent	chr1	43738569	43738569	C	G	1500015O10Rik	c.137C>G	p.Pro46Arg	missense_variant	MODERATE	38	0	0.032	29	7	0.222	2.746
Aplan_7298_NR_1000nM_C2_vs_Aplan_7298_NR_Parent	chr1	46224761	46224761	C	G	Dnah7b	c.6402C>G	p.Cys2134Trp	missense_variant	MODERATE	119	0	0.009339	120	24	0.207	5.99142
Aplan_7298_NR_1000nM_C2_vs_Aplan_7298_NR_Parent	chr1	57902151	57902151	C	G	Spats2l	c.775C>G	p.Arg259Gly	missense_variant	MODERATE	70	0	0.018	46	10	0.243	4.30127
Aplan_7298_NR_1000nM_C2_vs_Aplan_7298_NR_Parent	chr1	58070093	58070093	G	C	Aox1	c.2039G>C	p.Arg680Pro	missense_variant	MODERATE	52	0	0.022	40	13	0.336	5.26846
Aplan_7298_NR_1000nM_C2_vs_Aplan_7298_NR_Parent	chr1	60268412	60268412	G	T	Nbeal1	c.5082G>T	p.Ala1694Ala	synonymous_variant	LOW	51	0	0.022	43	9	0.225	3.27559
Aplan_7298_NR_1000nM_C2_vs_Aplan_7298_NR_Parent	chr1	62783350	62783350	C	G	Nrp2	c.2101C>G	p.Arg701Gly	missense_variant	MODERATE	80	0	0.015	44	12	0.289	5.87798
Aplan_7298_NR_1000nM_C2_vs_Aplan_7298_NR_Parent	chr1	69858574	69858575	TG	T	Spag16	c.483delG	p.Lys162fs	frameshift_variant	HIGH	59	0	0.02	56	19	0.32	6.12414
Aplan_7298_NR_1000nM_C2_vs_Aplan_7298_NR_Parent	chr1	71280341	71280341	G	C	Abca12	c.5381C>G	p.Ala1794Gly	missense_variant&splice_region_variant	MODERATE	24	0	0.044	34	6	0.205	1.43708
Aplan_7298_NR_1000nM_C2_vs_Aplan_7298_NR_Parent	chr1	74634067	74634067	C	G	Stk36	c.3118C>G	p.Arg1040Gly	missense_variant	MODERATE	255	0	0.004585	192	55	0.294	6.12639
Aplan_7298_NR_1000nM_C2_vs_Aplan_7298_NR_Parent	chr1	74635779	74635779	C	G	Stk36	c.3872C>G	p.Pro1291Arg	missense_variant	MODERATE	61	0	0.018	41	14	0.368	6.22718
Aplan_7298_NR_1000nM_C2_vs_Aplan_7298_NR_Parent	chr1	75146637	75146637	C	G	Fam134a	c.1208C>G	p.Thr403Arg	missense_variant	MODERATE	80	0	0.013	45	14	0.333	6.86575
Aplan_7298_NR_1000nM_C2_vs_Aplan_7298_NR_Parent	chr1	75402424	75402424	G	C	Speg	c.2847G>C	p.Ala949Ala	synonymous_variant	LOW	75	0	0.015	45	19	0.432	6.26189
Aplan_7298_NR_1000nM_C2_vs_Aplan_7298_NR_Parent	chr1	86090104	86090104	C	G	Psmd1	c.1636C>G	p.Arg546Gly	missense_variant	MODERATE	52	0	0.021	40	11	0.316	4.36645
Aplan_7298_NR_1000nM_C2_vs_Aplan_7298_NR_Parent	chr1	86305905	86305905	C	G	B3gnt7	c.872C>G	p.Pro291Arg	missense_variant	MODERATE	70	0	0.015	56	12	0.211	4.54244
Aplan_7298_NR_1000nM_C2_vs_Aplan_7298_NR_Parent	chr1	86388082	86388082	G	C	Nmur1	c.129C>G	p.Thr43Thr	synonymous_variant	LOW	44	0	0.024	30	5	0.207	2.05323
Aplan_7298_NR_1000nM_C2_vs_Aplan_7298_NR_Parent	chr1	86930793	86930793	C	G	Dis3l2	c.1200C>G	p.Arg400Arg	synonymous_variant	LOW	93	0	0.012	60	17	0.294	6.03261
Aplan_7298_NR_1000nM_C2_vs_Aplan_7298_NR_Parent	chr1	87154545	87154545	C	G	Ecel1	c.445G>C	p.Gly149Arg	missense_variant	MODERATE	44	0	0.025	26	7	0.307	3.26064
Aplan_7298_NR_1000nM_C2_vs_Aplan_7298_NR_Parent	chr1	87190718	87190718	C	G	Chrnd	c.28C>G	p.Leu10Val	missense_variant	MODERATE	77	0	0.015	68	14	0.21	4.94658
Aplan_7298_NR_1000nM_C2_vs_Aplan_7298_NR_Parent	chr1	91101248	91101248	C	G	Lrrfip1	c.253C>G	p.Arg85Gly	missense_variant	MODERATE	59	0	0.02	47	14	0.285	5.49054
Aplan_7298_NR_1000nM_C2_vs_Aplan_7298_NR_Parent	chr1	93006663	93006663	C	G	Aqp12	c.261C>G	p.Phe87Leu	missense_variant	MODERATE	106	0	0.011	60	17	0.281	6.61181
Aplan_7298_NR_1000nM_C2_vs_Aplan_7298_NR_Parent	chr1	93060287	93060287	C	G	Kif1a	c.1567G>C	p.Ala523Pro	missense_variant	MODERATE	57	0	0.02	26	7	0.301	3.80015
Aplan_7298_NR_1000nM_C2_vs_Aplan_7298_NR_Parent	chr1	100358687	100358687	C	G	Cntnap5b	c.2108C>G	p.Ser703Cys	missense_variant	MODERATE	41	0	0.028	26	9	0.388	4.13623
Aplan_7298_NR_1000nM_C2_vs_Aplan_7298_NR_Parent	chr1	118836215	118836215	C	G	Gli2	c.4205G>C	p.Arg1402Pro	missense_variant	MODERATE	71	0	0.015	54	14	0.275	5.57686
Aplan_7298_NR_1000nM_C2_vs_Aplan_7298_NR_Parent	chr1	118840306	118840306	G	C	Gli2	c.2190C>G	p.Ala730Ala	synonymous_variant	LOW	56	0	0.021	35	9	0.278	4.04534
Aplan_7298_NR_1000nM_C2_vs_Aplan_7298_NR_Parent	chr1	120188107	120188107	C	G	3110009E18Rik	c.371C>G	p.Ser124Trp	missense_variant	MODERATE	83	0	0.016	64	12	0.222	4.61076
Aplan_7298_NR_1000nM_C2_vs_Aplan_7298_NR_Parent	chr1	120606987	120606987	G	A	En1	c.1004G>A	p.Arg335His	missense_variant	MODERATE	23	0	0.042	13	5	0.385	2.46675
Aplan_7298_NR_1000nM_C2_vs_Aplan_7298_NR_Parent	chr1	128301016	128301016	G	C	Lct	c.2739C>G	p.Gly913Gly	synonymous_variant	LOW	133	0	0.008013	73	18	0.27	7.12989
Aplan_7298_NR_1000nM_C2_vs_Aplan_7298_NR_Parent	chr1	131663348	131663348	C	G	Ctse	c.266C>G	p.Pro89Arg	missense_variant	MODERATE	63	0	0.018	60	15	0.244	5.11998
Aplan_7298_NR_1000nM_C2_vs_Aplan_7298_NR_Parent	chr1	131921999	131921999	C	G	Nucks1	c.124C>G	p.Arg42Gly	missense_variant	MODERATE	41	0	0.031	38	16	0.463	5.98665
Aplan_7298_NR_1000nM_C2_vs_Aplan_7298_NR_Parent	chr1	133292433	133292433	C	G	Plekha6	c.2863C>G	p.Arg955Gly	missense_variant	MODERATE	13	0	0.075	9	6	0.637	2.94854
Aplan_7298_NR_1000nM_C2_vs_Aplan_7298_NR_Parent	chr1	134987679	134987679	C	G	Lgr6	c.2161G>C	p.Ala721Pro	missense_variant	MODERATE	25	0	0.041	13	5	0.4	2.59107
Aplan_7298_NR_1000nM_C2_vs_Aplan_7298_NR_Parent	chr1	135304503	135304503	G	C	Timm17a	c.357C>G	p.Gly119Gly	synonymous_variant	LOW	61	0	0.021	36	13	0.377	6.30472
Aplan_7298_NR_1000nM_C2_vs_Aplan_7298_NR_Parent	chr1	135889790	135889790	C	G	Pkp1	c.606G>C	p.Val202Val	synonymous_variant	LOW	90	0	0.013	45	18	0.368	6.59483
Aplan_7298_NR_1000nM_C2_vs_Aplan_7298_NR_Parent	chr1	135889792	135889792	C	G	Pkp1	c.604G>C	p.Val202Leu	missense_variant	MODERATE	90	0	0.013	45	18	0.368	6.59483
Aplan_7298_NR_1000nM_C2_vs_Aplan_7298_NR_Parent	chr1	136482428	136482428	C	G	Kif14	c.1892C>G	p.Thr631Arg	missense_variant	MODERATE	40	0	0.027	33	8	0.272	2.98595
Aplan_7298_NR_1000nM_C2_vs_Aplan_7298_NR_Parent	chr1	150680709	150680709	C	G	Hmcn1	c.7325G>C	p.Arg2442Pro	missense_variant	MODERATE	94	0	0.012	85	17	0.209	5.90256
Aplan_7298_NR_1000nM_C2_vs_Aplan_7298_NR_Parent	chr1	159324943	159324943	C	G	Rfwd2	c.1762C>G	p.Arg588Gly	missense_variant	MODERATE	98	0	0.012	93	23	0.238	6.31519
Aplan_7298_NR_1000nM_C2_vs_Aplan_7298_NR_Parent	chr1	161163288	161163288	C	G	Ankrd45	c.712C>G	p.Arg238Gly	missense_variant	MODERATE	60	0	0.018	55	13	0.23	4.52721
Aplan_7298_NR_1000nM_C2_vs_Aplan_7298_NR_Parent	chr1	164137297	164137297	C	G	Selp	c.1519+8C>G		splice_region_variant&intron_variant	LOW	96	0	0.011	78	19	0.261	7.21566
Aplan_7298_NR_1000nM_C2_vs_Aplan_7298_NR_Parent	chr1	166152649	166152649	G	C	Gpa33	c.280G>C	p.Asp94His	missense_variant	MODERATE	95	0	0.012	56	14	0.27	6.53159
Aplan_7298_NR_1000nM_C2_vs_Aplan_7298_NR_Parent	chr1	166490117	166490117	G	C	Gm4846	c.729C>G	p.Thr243Thr	synonymous_variant	LOW	51	0	0.023	33	6	0.211	2.56467
Aplan_7298_NR_1000nM_C2_vs_Aplan_7298_NR_Parent	chr1	170834943	170834943	G	A	Atf6	c.747C>T	p.Ala249Ala	synonymous_variant	LOW	56	0	0.02	63	16	0.291	4.81912
Aplan_7298_NR_1000nM_C2_vs_Aplan_7298_NR_Parent	chr1	171238023	171238023	C	G	Ndufs2	c.908G>C	p.Arg303Pro	missense_variant	MODERATE	56	0	0.019	36	11	0.297	4.95166
Aplan_7298_NR_1000nM_C2_vs_Aplan_7298_NR_Parent	chr1	172009736	172009736	G	C	Vangl2	c.505C>G	p.Arg169Gly	missense_variant	MODERATE	38	0	0.025	26	6	0.26	2.51275
Aplan_7298_NR_1000nM_C2_vs_Aplan_7298_NR_Parent	chr1	173926938	173926938	G	A	Ifi203	c.2226C>T	p.Ser742Ser	synonymous_variant	LOW	106	0	0.011	101	58	0.573	5.93787
Aplan_7298_NR_1000nM_C2_vs_Aplan_7298_NR_Parent	chr1	182748513	182748513	G	C	Ccdc185	c.610C>G	p.Arg204Gly	missense_variant	MODERATE	66	0	0.016	39	13	0.371	6.23525
Aplan_7298_NR_1000nM_C2_vs_Aplan_7298_NR_Parent	chr1	186117164	186117164	G	C	Lyplal1	c.87C>G	p.His29Gln	missense_variant	MODERATE	59	0	0.022	41	9	0.278	3.73477
Aplan_7298_NR_1000nM_C2_vs_Aplan_7298_NR_Parent	chr1	188550224	188550224	C	G	Ush2a	c.5809C>G	p.Arg1937Gly	missense_variant	MODERATE	61	0	0.019	41	11	0.305	4.75118
Aplan_7298_NR_1000nM_C2_vs_Aplan_7298_NR_Parent	chr1	188678293	188678293	C	T	Ush2a	c.7137C>T	p.Arg2379Arg	synonymous_variant	LOW	75	0	0.015	65	13	0.225	4.64048
Aplan_7298_NR_1000nM_C2_vs_Aplan_7298_NR_Parent	chr1	190905108	190905108	C	G	Rps6kc1	c.116G>C	p.Arg39Pro	missense_variant	MODERATE	110	0	0.011	61	16	0.25	6.19187
Aplan_7298_NR_1000nM_C2_vs_Aplan_7298_NR_Parent	chr1	190940987	190940987	C	G	Angel2	c.826C>G	p.Arg276Gly	missense_variant	MODERATE	84	0	0.013	57	12	0.23	5.05165
Aplan_7298_NR_1000nM_C2_vs_Aplan_7298_NR_Parent	chr1	191621427	191621427	C	T	Ints7	c.2864C>T	p.Pro955Leu	missense_variant	MODERATE	42	0	0.029	28	7	0.285	3.00537
Aplan_7298_NR_1000nM_C2_vs_Aplan_7298_NR_Parent	chr1	193330774	193330774	C	G	Lamb3	c.1306C>G	p.Arg436Gly	missense_variant	MODERATE	35	0	0.028	30	7	0.261	2.53399
Aplan_7298_NR_1000nM_C2_vs_Aplan_7298_NR_Parent	chr1	193332212	193332212	C	G	Lamb3	c.1678C>G	p.Arg560Gly	missense_variant	MODERATE	86	0	0.013	56	18	0.356	6.50989
Aplan_7298_NR_1000nM_C2_vs_Aplan_7298_NR_Parent	chr2	6100945	6100945	G	C	Proser2	c.807C>G	p.Ser269Arg	missense_variant	MODERATE	132	0	0.008881	71	17	0.254	6.74074
Aplan_7298_NR_1000nM_C2_vs_Aplan_7298_NR_Parent	chr2	14248952	14248952	C	G	Mrc1	c.783C>G	p.His261Gln	missense_variant	MODERATE	54	0	0.02	40	11	0.263	4.47516
Aplan_7298_NR_1000nM_C2_vs_Aplan_7298_NR_Parent	chr2	18732033	18732033	C	G	Spag6	c.566C>G	p.Ser189Trp	missense_variant	MODERATE	84	0	0.014	64	20	0.291	6.55906
Aplan_7298_NR_1000nM_C2_vs_Aplan_7298_NR_Parent	chr2	18845874	18845874	C	G	Pip4k2a	c.1140+1G>C		splice_donor_variant&intron_variant	HIGH	68	0	0.017	55	14	0.265	5.34567
Aplan_7298_NR_1000nM_C2_vs_Aplan_7298_NR_Parent	chr2	21368346	21368346	C	G	Gpr158	c.91C>G	p.Arg31Gly	missense_variant	MODERATE	109	0	0.011	67	16	0.259	7.25169
Aplan_7298_NR_1000nM_C2_vs_Aplan_7298_NR_Parent	chr2	25277689	25277689	C	G	Anapc2	c.1267C>G	p.Arg423Gly	missense_variant	MODERATE	95	0	0.012	60	13	0.233	5.74213
Aplan_7298_NR_1000nM_C2_vs_Aplan_7298_NR_Parent	chr2	25305087	25305087	C	G	Grin1	c.919G>C	p.Gly307Arg	missense_variant	MODERATE	34	0	0.029	24	5	0.217	2.03264
Aplan_7298_NR_1000nM_C2_vs_Aplan_7298_NR_Parent	chr2	25939717	25939717	G	C	Camsap1	c.2054C>G	p.Ala685Gly	missense_variant	MODERATE	90	0	0.012	54	15	0.302	6.99383
Aplan_7298_NR_1000nM_C2_vs_Aplan_7298_NR_Parent	chr2	26358907	26358907	C	G	Card9	c.229G>C	p.Val77Leu	missense_variant	MODERATE	76	0	0.014	51	16	0.311	7.0563
Aplan_7298_NR_1000nM_C2_vs_Aplan_7298_NR_Parent	chr2	28497797	28497797	C	G	Gbgt1	c.32C>G	p.Ala11Gly	missense_variant	MODERATE	148	0	0.007816	94	25	0.251	6.89667
Aplan_7298_NR_1000nM_C2_vs_Aplan_7298_NR_Parent	chr2	28545193	28545193	C	G	Ralgds	c.1360C>G	p.Arg454Gly	missense_variant	MODERATE	93	0	0.012	53	13	0.275	6.17837
Aplan_7298_NR_1000nM_C2_vs_Aplan_7298_NR_Parent	chr2	29147399	29147399	C	G	Setx	c.3895C>G	p.Arg1299Gly	missense_variant	MODERATE	103	0	0.011	73	15	0.209	6.13702
Aplan_7298_NR_1000nM_C2_vs_Aplan_7298_NR_Parent	chr2	29893129	29893129	C	G	Odf2	c.83C>G	p.Pro28Arg	missense_variant	MODERATE	25	0	0.045	23	6	0.271	2.0848
Aplan_7298_NR_1000nM_C2_vs_Aplan_7298_NR_Parent	chr2	29914411	29914411	G	C	Odf2	c.993G>C	p.Ala331Ala	synonymous_variant	LOW	85	0	0.013	61	19	0.334	6.44714
Aplan_7298_NR_1000nM_C2_vs_Aplan_7298_NR_Parent	chr2	29993843	29993843	G	C	Sptan1	c.1694G>C	p.Arg565Pro	missense_variant	MODERATE	56	0	0.018	58	11	0.219	3.23265
Aplan_7298_NR_1000nM_C2_vs_Aplan_7298_NR_Parent	chr2	30015958	30015958	C	G	Sptan1	c.4930C>G	p.Gln1644Glu	missense_variant	MODERATE	69	1	0.017	35	9	0.264	3.71289
Aplan_7298_NR_1000nM_C2_vs_Aplan_7298_NR_Parent	chr2	30377531	30377531	C	G	Fam73b	c.947C>G	p.Ala316Gly	missense_variant	MODERATE	97	0	0.013	59	14	0.276	6.37855
Aplan_7298_NR_1000nM_C2_vs_Aplan_7298_NR_Parent	chr2	30396033	30396033	C	G	Dolpp1	c.234C>G	p.His78Gln	missense_variant	MODERATE	112	0	0.009918	56	13	0.23	6.65147
Aplan_7298_NR_1000nM_C2_vs_Aplan_7298_NR_Parent	chr2	32386021	32386021	C	G	Lcn2	c.296G>C	p.Arg99Pro	missense_variant	MODERATE	77	0	0.015	41	14	0.324	7.17042
Aplan_7298_NR_1000nM_C2_vs_Aplan_7298_NR_Parent	chr2	32712036	32712036	C	G	Cdk9	c.169G>C	p.Glu57Gln	missense_variant	MODERATE	115	1	0.011	61	15	0.264	6.38252
Aplan_7298_NR_1000nM_C2_vs_Aplan_7298_NR_Parent	chr2	32779041	32779041	C	G	Cfap157	c.1049G>C	p.Arg350Pro	missense_variant	MODERATE	177	0	0.007085	102	27	0.263	6.17166
Aplan_7298_NR_1000nM_C2_vs_Aplan_7298_NR_Parent	chr2	32798181	32798181	C	G	Stxbp1	c.1471G>C	p.Glu491Gln	missense_variant	MODERATE	53	0	0.021	52	16	0.292	5.48018
Aplan_7298_NR_1000nM_C2_vs_Aplan_7298_NR_Parent	chr2	36091334	36091334	G	C	Lhx6	c.865C>G	p.Arg289Gly	missense_variant	MODERATE	147	0	0.008177	80	15	0.211	7.19669
Aplan_7298_NR_1000nM_C2_vs_Aplan_7298_NR_Parent	chr2	37596737	37596737	C	T	Strbp	c.1740G>A	p.Ala580Ala	synonymous_variant	LOW	82	0	0.014	63	16	0.25	6.32436
Aplan_7298_NR_1000nM_C2_vs_Aplan_7298_NR_Parent	chr2	38354852	38354852	G	C	Lhx2	c.727G>C	p.Ala243Pro	missense_variant&splice_region_variant	MODERATE	66	0	0.016	32	9	0.249	4.749
Aplan_7298_NR_1000nM_C2_vs_Aplan_7298_NR_Parent	chr2	51132416	51132416	C	A	Rnd3	c.613G>T	p.Val205Phe	missense_variant	MODERATE	53	0	0.018	59	12	0.218	3.50327
Aplan_7298_NR_1000nM_C2_vs_Aplan_7298_NR_Parent	chr2	59903195	59903195	G	C	Baz2b	c.5772C>G	p.Pro1924Pro	synonymous_variant	LOW	68	0	0.016	57	15	0.295	5.61379
Aplan_7298_NR_1000nM_C2_vs_Aplan_7298_NR_Parent	chr2	59913562	59913562	G	A	Baz2b	c.4598C>T	p.Pro1533Leu	missense_variant	MODERATE	36	0	0.028	38	12	0.317	3.74371
Aplan_7298_NR_1000nM_C2_vs_Aplan_7298_NR_Parent	chr2	63979583	63979583	G	C	Fign	c.1342C>G	p.Arg448Gly	missense_variant	MODERATE	62	0	0.016	53	12	0.235	4.36388
Aplan_7298_NR_1000nM_C2_vs_Aplan_7298_NR_Parent	chr2	66288939	66288939	G	C	Scn1a	c.4219C>G	p.Arg1407Gly	missense_variant	MODERATE	62	0	0.019	78	19	0.238	5.22214
Aplan_7298_NR_1000nM_C2_vs_Aplan_7298_NR_Parent	chr2	69245906	69245906	G	C	Abcb11	c.3457C>G	p.Arg1153Gly	missense_variant	MODERATE	60	0	0.019	37	9	0.249	4.06024
Aplan_7298_NR_1000nM_C2_vs_Aplan_7298_NR_Parent	chr2	75981129	75981129	G	C	Ttc30a1	c.609C>G	p.Tyr203*	stop_gained	HIGH	149	0	0.007305	123	29	0.232	6.40582
Aplan_7298_NR_1000nM_C2_vs_Aplan_7298_NR_Parent	chr2	76742910	76742910	C	G	Ttn	c.72400G>C	p.Gly24134Arg	missense_variant	MODERATE	97	0	0.011	72	17	0.253	6.8293
Aplan_7298_NR_1000nM_C2_vs_Aplan_7298_NR_Parent	chr2	76788535	76788535	C	G	Ttn	c.43261G>C	p.Val14421Leu	missense_variant	MODERATE	151	0	0.007249	127	30	0.235	6.70304
Aplan_7298_NR_1000nM_C2_vs_Aplan_7298_NR_Parent	chr2	76812532	76812532	G	A	Ttn	c.34521C>T	p.Gly11507Gly	synonymous_variant	LOW	85	0	0.013	66	12	0.21	4.58033
Aplan_7298_NR_1000nM_C2_vs_Aplan_7298_NR_Parent	chr2	76872693	76872693	G	C	Ttn	c.25658C>G	p.Ala8553Gly	missense_variant	MODERATE	51	0	0.022	42	15	0.383	5.89854
Aplan_7298_NR_1000nM_C2_vs_Aplan_7298_NR_Parent	chr2	76891475	76891475	G	C	Ttn	c.17202C>G	p.Asp5734Glu	missense_variant	MODERATE	74	0	0.014	48	13	0.267	5.75534
Aplan_7298_NR_1000nM_C2_vs_Aplan_7298_NR_Parent	chr2	76943309	76943309	G	A	Ttn	c.6967C>T	p.Arg2323Cys	missense_variant	MODERATE	138	0	0.008137	114	32	0.298	6.25461
Aplan_7298_NR_1000nM_C2_vs_Aplan_7298_NR_Parent	chr2	76977184	76977184	G	C	Ttn	c.204C>G	p.Pro68Pro	synonymous_variant	LOW	43	0	0.024	37	15	0.353	5.85043
Aplan_7298_NR_1000nM_C2_vs_Aplan_7298_NR_Parent	chr2	82259373	82259373	T	G	Zfp804a	c.3545T>G	p.Phe1182Cys	missense_variant	MODERATE	177	0	0.006904	150	40	0.241	6.1191
Aplan_7298_NR_1000nM_C2_vs_Aplan_7298_NR_Parent	chr2	87510287	87510287	C	G	Pramel6	c.962C>G	p.Pro321Arg	missense_variant	MODERATE	87	0	0.013	82	24	0.294	6.11067
Aplan_7298_NR_1000nM_C2_vs_Aplan_7298_NR_Parent	chr2	87532442	87532442	C	G	Olfr153	c.408C>G	p.Ser136Ser	synonymous_variant	LOW	294	1	0.00366	193	37	0.208	5.98236
Aplan_7298_NR_1000nM_C2_vs_Aplan_7298_NR_Parent	chr2	91206068	91206068	G	C	Acp2	c.509G>C	p.Arg170Pro	missense_variant	MODERATE	96	0	0.012	67	18	0.251	6.06749
Aplan_7298_NR_1000nM_C2_vs_Aplan_7298_NR_Parent	chr2	91473231	91473231	G	C	Lrp4	c.274G>C	p.Gly92Arg	missense_variant	MODERATE	81	0	0.014	56	10	0.215	4.10984
Aplan_7298_NR_1000nM_C2_vs_Aplan_7298_NR_Parent	chr2	92389173	92389173	C	G	Mapk8ip1	c.312G>C	p.Pro104Pro	synonymous_variant	LOW	30	0	0.035	16	8	0.43	4.30695
Aplan_7298_NR_1000nM_C2_vs_Aplan_7298_NR_Parent	chr2	94371794	94371794	C	G	Ttc17	c.1162G>C	p.Glu388Gln	missense_variant	MODERATE	42	0	0.029	41	12	0.289	4.08855
Aplan_7298_NR_1000nM_C2_vs_Aplan_7298_NR_Parent	chr2	112641101	112641101	C	G	Ryr3	c.13763G>C	p.Arg4588Pro	missense_variant	MODERATE	68	0	0.016	50	11	0.245	4.4085
Aplan_7298_NR_1000nM_C2_vs_Aplan_7298_NR_Parent	chr2	118638516	118638516	C	G	Bub1b	c.2761C>G	p.Arg921Gly	missense_variant	MODERATE	64	0	0.018	49	10	0.268	3.87825
Aplan_7298_NR_1000nM_C2_vs_Aplan_7298_NR_Parent	chr2	118693369	118693369	G	C	Pak6	c.1004G>C	p.Arg335Pro	missense_variant	MODERATE	141	0	0.007951	73	16	0.218	6.39348
Aplan_7298_NR_1000nM_C2_vs_Aplan_7298_NR_Parent	chr2	118711487	118711487	G	C	Plcb2	c.2710C>G	p.Arg904Gly	missense_variant	MODERATE	86	0	0.012	58	17	0.304	7.41862
Aplan_7298_NR_1000nM_C2_vs_Aplan_7298_NR_Parent	chr2	118789786	118789786	G	C	Disp2	c.998G>C	p.Gly333Ala	missense_variant	MODERATE	78	0	0.014	47	11	0.244	5.0272
Aplan_7298_NR_1000nM_C2_vs_Aplan_7298_NR_Parent	chr2	119294611	119294611	G	C	Vps18	c.2018G>C	p.Arg673Pro	missense_variant	MODERATE	48	0	0.023	28	7	0.222	3.26632
Aplan_7298_NR_1000nM_C2_vs_Aplan_7298_NR_Parent	chr2	120269992	120269992	G	C	Pla2g4d	c.1858C>G	p.Arg620Gly	missense_variant	MODERATE	43	0	0.026	18	5	0.262	2.84158
Aplan_7298_NR_1000nM_C2_vs_Aplan_7298_NR_Parent	chr2	121139431	121139431	G	C	Lcmt2	c.1170C>G	p.His390Gln	missense_variant	MODERATE	132	0	0.008402	88	26	0.3	5.82132
Aplan_7298_NR_1000nM_C2_vs_Aplan_7298_NR_Parent	chr2	122611157	122611157	G	C	Gatm	c.60C>G	p.Ile20Met	missense_variant	MODERATE	19	0	0.056	15	5	0.4	1.96689
Aplan_7298_NR_1000nM_C2_vs_Aplan_7298_NR_Parent	chr2	125466673	125466673	G	C	Fbn1	c.468C>G	p.Asn156Lys	missense_variant	MODERATE	68	0	0.018	59	15	0.268	5.46607
Aplan_7298_NR_1000nM_C2_vs_Aplan_7298_NR_Parent	chr2	130739440	130739440	G	C	4930402H24Rik	c.2054C>G	p.Ala685Gly	missense_variant	MODERATE	49	0	0.023	30	6	0.241	2.67036
Aplan_7298_NR_1000nM_C2_vs_Aplan_7298_NR_Parent	chr2	131145079	131145079	C	G	Hspa12b	c.1919C>G	p.Pro640Arg	missense_variant	MODERATE	47	0	0.025	39	7	0.211	2.54325
Aplan_7298_NR_1000nM_C2_vs_Aplan_7298_NR_Parent	chr2	132071421	132071421	G	C	Slc23a2	c.986C>G	p.Thr329Arg	missense_variant	MODERATE	52	0	0.021	40	12	0.298	4.81253
Aplan_7298_NR_1000nM_C2_vs_Aplan_7298_NR_Parent	chr2	145616664	145616664	C	G	Slc24a3	c.1413C>G	p.Ala471Ala	synonymous_variant	LOW	76	0	0.016	57	22	0.375	5.83869
Aplan_7298_NR_1000nM_C2_vs_Aplan_7298_NR_Parent	chr2	147084327	147084327	C	G	Nkx2-4	c.614G>C	p.Arg205Pro	missense_variant	MODERATE	40	0	0.033	21	9	0.409	4.77085
Aplan_7298_NR_1000nM_C2_vs_Aplan_7298_NR_Parent	chr2	152311891	152311891	G	C	Tbc1d20	c.1135G>C	p.Gly379Arg	missense_variant	MODERATE	39	0	0.029	20	6	0.315	3.06538
Aplan_7298_NR_1000nM_C2_vs_Aplan_7298_NR_Parent	chr2	152990069	152990069	C	G	Ttll9	c.565C>G	p.Arg189Gly	missense_variant	MODERATE	36	0	0.032	21	7	0.334	3.35673
Aplan_7298_NR_1000nM_C2_vs_Aplan_7298_NR_Parent	chr2	152991615	152991615	C	G	Ttll9	c.632C>G	p.Pro211Arg	missense_variant	MODERATE	65	0	0.018	48	9	0.208	3.55142
Aplan_7298_NR_1000nM_C2_vs_Aplan_7298_NR_Parent	chr2	153074854	153074854	G	C	Ccm2l	c.1004G>C	p.Arg335Pro	missense_variant	MODERATE	22	0	0.048	15	5	0.352	2.16183
Aplan_7298_NR_1000nM_C2_vs_Aplan_7298_NR_Parent	chr2	155614137	155614137	C	G	Myh7b	c.441C>G	p.Ser147Ser	synonymous_variant	LOW	72	0	0.015	50	13	0.266	5.49068
Aplan_7298_NR_1000nM_C2_vs_Aplan_7298_NR_Parent	chr2	156883607	156883607	G	C	Sla2	c.70C>G	p.Pro24Ala	missense_variant	MODERATE	87	0	0.014	49	15	0.312	7.34125
Aplan_7298_NR_1000nM_C2_vs_Aplan_7298_NR_Parent	chr2	157020737	157020737	C	G	Soga1	c.4271G>C	p.Arg1424Pro	missense_variant	MODERATE	27	0	0.036	23	5	0.273	1.79911
Aplan_7298_NR_1000nM_C2_vs_Aplan_7298_NR_Parent	chr2	158786007	158786007	C	G	Fam83d	c.1615C>G	p.Arg539Gly	missense_variant	MODERATE	50	0	0.021	30	9	0.312	4.20975
Aplan_7298_NR_1000nM_C2_vs_Aplan_7298_NR_Parent	chr2	160905309	160905309	C	G	Lpin3	c.2454C>G	p.Arg818Arg	synonymous_variant	LOW	45	0	0.025	44	8	0.237	2.60042
Aplan_7298_NR_1000nM_C2_vs_Aplan_7298_NR_Parent	chr2	164168202	164168202	C	T	Kcns1	c.636G>A	p.Pro212Pro	synonymous_variant	LOW	27	0	0.035	22	8	0.394	3.14932
Aplan_7298_NR_1000nM_C2_vs_Aplan_7298_NR_Parent	chr2	164851515	164851515	G	C	Pltp	c.703C>G	p.Arg235Gly	missense_variant&splice_region_variant	MODERATE	63	0	0.018	31	11	0.382	5.91137
Aplan_7298_NR_1000nM_C2_vs_Aplan_7298_NR_Parent	chr2	164950084	164950084	G	C	Mmp9	c.787G>C	p.Asp263His	missense_variant	MODERATE	86	0	0.013	53	18	0.347	6.81466
Aplan_7298_NR_1000nM_C2_vs_Aplan_7298_NR_Parent	chr2	165112586	165112586	C	G	Cdh22	c.2014G>C	p.Gly672Arg	missense_variant	MODERATE	62	0	0.018	25	7	0.292	4.08479
Aplan_7298_NR_1000nM_C2_vs_Aplan_7298_NR_Parent	chr2	165143713	165143713	C	G	Cdh22	c.952G>C	p.Gly318Arg	missense_variant	MODERATE	80	0	0.014	53	10	0.208	4.23817
Aplan_7298_NR_1000nM_C2_vs_Aplan_7298_NR_Parent	chr2	172979903	172979903	G	C	Spo11	c.10G>C	p.Ala4Pro	missense_variant	MODERATE	20	0	0.053	7	5	0.572	3.58482
Aplan_7298_NR_1000nM_C2_vs_Aplan_7298_NR_Parent	chr2	173008255	173008255	G	C	Rae1	c.474G>C	p.Thr158Thr	synonymous_variant	LOW	161	0	0.00708	108	27	0.256	6.03209
Aplan_7298_NR_1000nM_C2_vs_Aplan_7298_NR_Parent	chr2	174111196	174111196	C	G	Npepl1	c.270C>G	p.Ser90Ser	synonymous_variant	LOW	67	0	0.017	51	11	0.234	4.30299
Aplan_7298_NR_1000nM_C2_vs_Aplan_7298_NR_Parent	chr2	180172171	180172171	T	G	Adrm1	c.137T>G	p.Leu46Arg	missense_variant	MODERATE	46	0	0.023	42	10	0.242	3.48679
Aplan_7298_NR_1000nM_C2_vs_Aplan_7298_NR_Parent	chr2	180208325	180208325	C	G	Lama5	c.512G>C	p.Arg171Pro	missense_variant	MODERATE	24	0	0.039	23	7	0.319	2.40915
Aplan_7298_NR_1000nM_C2_vs_Aplan_7298_NR_Parent	chr2	180334190	180334190	C	G	Gata5	c.180G>C	p.Ala60Ala	synonymous_variant	LOW	25	0	0.04	15	5	0.313	2.34068
Aplan_7298_NR_1000nM_C2_vs_Aplan_7298_NR_Parent	chr2	180635393	180635393	C	G	Tcfl5	c.1208G>C	p.Arg403Pro	missense_variant&splice_region_variant	MODERATE	39	0	0.026	30	10	0.31	4.05375
Aplan_7298_NR_1000nM_C2_vs_Aplan_7298_NR_Parent	chr2	181795876	181795876	C	G	Myt1	c.505C>G	p.His169Asp	missense_variant	MODERATE	34	0	0.033	17	8	0.474	4.41819
Aplan_7298_NR_1000nM_C2_vs_Aplan_7298_NR_Parent	chr3	5242795	5242795	C	G	Zfhx4	c.1080C>G	p.Arg360Arg	synonymous_variant	LOW	51	0	0.02	60	16	0.279	4.71622
Aplan_7298_NR_1000nM_C2_vs_Aplan_7298_NR_Parent	chr3	20270265	20270265	C	G	Cpb1	c.244G>C	p.Glu82Gln	missense_variant	MODERATE	23	0	0.049	28	7	0.308	1.90852
Aplan_7298_NR_1000nM_C2_vs_Aplan_7298_NR_Parent	chr3	27372001	27372001	C	G	Ghsr	c.205C>G	p.Arg69Gly	missense_variant	MODERATE	106	0	0.009557	63	19	0.295	6.01619
Aplan_7298_NR_1000nM_C2_vs_Aplan_7298_NR_Parent	chr3	31209223	31209223	G	C	Slc7a14	c.2169C>G	p.Pro723Pro	synonymous_variant	LOW	88	0	0.013	49	12	0.244	5.77994
Aplan_7298_NR_1000nM_C2_vs_Aplan_7298_NR_Parent	chr3	32569503	32569503	G	C	Mfn1	c.1831G>C	p.Gly611Arg	missense_variant	MODERATE	46	0	0.024	35	7	0.242	2.71357
Aplan_7298_NR_1000nM_C2_vs_Aplan_7298_NR_Parent	chr3	36450423	36450423	C	G	Anxa5	c.786G>C	p.Thr262Thr	synonymous_variant	LOW	47	0	0.022	29	5	0.213	2.19193
Aplan_7298_NR_1000nM_C2_vs_Aplan_7298_NR_Parent	chr3	45380565	45380565	G	C	Pcdh10	c.1313G>C	p.Arg438Pro	missense_variant	MODERATE	71	0	0.015	48	13	0.244	5.60725
Aplan_7298_NR_1000nM_C2_vs_Aplan_7298_NR_Parent	chr3	45380918	45380918	G	C	Pcdh10	c.1666G>C	p.Gly556Arg	missense_variant	MODERATE	40	0	0.026	21	8	0.362	4.16052
Aplan_7298_NR_1000nM_C2_vs_Aplan_7298_NR_Parent	chr3	53522266	53522266	C	G	Frem2	c.8362G>C	p.Val2788Leu	missense_variant	MODERATE	144	0	0.008014	101	20	0.219	6.66833
Aplan_7298_NR_1000nM_C2_vs_Aplan_7298_NR_Parent	chr3	59326241	59326241	T	C	Igsf10	c.5070A>G	p.Gly1690Gly	synonymous_variant	LOW	22	0	0.043	29	6	0.206	1.51543
Aplan_7298_NR_1000nM_C2_vs_Aplan_7298_NR_Parent	chr3	62340213	62340213	G	C	Arhgef26	c.717G>C	p.Ala239Ala	synonymous_variant	LOW	68	0	0.016	49	10	0.208	4.03559
Aplan_7298_NR_1000nM_C2_vs_Aplan_7298_NR_Parent	chr3	63711027	63711027	G	C	Plch1	c.2086C>G	p.Arg696Gly	missense_variant	MODERATE	107	0	0.011	99	22	0.242	6.01286
Aplan_7298_NR_1000nM_C2_vs_Aplan_7298_NR_Parent	chr3	68870395	68870395	C	G	1110032F04Rik	c.688C>G	p.Arg230Gly	missense_variant	MODERATE	35	0	0.029	18	7	0.421	3.68517
Aplan_7298_NR_1000nM_C2_vs_Aplan_7298_NR_Parent	chr3	79068968	79068968	G	C	Rapgef2	c.4080C>G	p.Pro1360Pro	synonymous_variant	LOW	86	0	0.013	49	11	0.25	5.18638
Aplan_7298_NR_1000nM_C2_vs_Aplan_7298_NR_Parent	chr3	83012915	83012915	G	C	Fgg	c.1000G>C	p.Gly334Arg	missense_variant	MODERATE	95	0	0.012	70	21	0.302	7.08397
Aplan_7298_NR_1000nM_C2_vs_Aplan_7298_NR_Parent	chr3	85601887	85601887	G	C	Gatb	c.355G>C	p.Ala119Pro	missense_variant	MODERATE	58	0	0.02	45	9	0.22	3.45211
Aplan_7298_NR_1000nM_C2_vs_Aplan_7298_NR_Parent	chr3	87971482	87971482	C	G	Nes	c.280C>G	p.Arg94Gly	missense_variant	MODERATE	10	0	0.083	7	5	0.667	2.46933
Aplan_7298_NR_1000nM_C2_vs_Aplan_7298_NR_Parent	chr3	87971569	87971569	C	G	Nes	c.367C>G	p.Arg123Gly	missense_variant	MODERATE	9	0	0.091	6	5	0.714	2.6994
Aplan_7298_NR_1000nM_C2_vs_Aplan_7298_NR_Parent	chr3	88450111	88450111	C	G	Sema4a	c.687G>C	p.Ala229Ala	splice_region_variant&synonymous_variant	LOW	37	0	0.029	37	7	0.219	1.94149
Aplan_7298_NR_1000nM_C2_vs_Aplan_7298_NR_Parent	chr3	88652581	88652581	C	G	Rxfp4	c.562G>C	p.Val188Leu	missense_variant	MODERATE	38	0	0.027	24	7	0.32	3.15258
Aplan_7298_NR_1000nM_C2_vs_Aplan_7298_NR_Parent	chr3	89946440	89946440	C	G	Atp8b2	c.2023G>C	p.Gly675Arg	missense_variant	MODERATE	141	0	0.007607	115	38	0.316	6.0972
Aplan_7298_NR_1000nM_C2_vs_Aplan_7298_NR_Parent	chr3	89959031	89959031	C	G	Atp8b2	c.50G>C	p.Arg17Pro	missense_variant	MODERATE	139	0	0.008576	70	18	0.284	6.23282
Aplan_7298_NR_1000nM_C2_vs_Aplan_7298_NR_Parent	chr3	90465060	90465060	G	C	Npr1	c.444C>G	p.Tyr148*	stop_gained	HIGH	22	0	0.044	19	7	0.369	2.64951
Aplan_7298_NR_1000nM_C2_vs_Aplan_7298_NR_Parent	chr3	92967974	92967974	G	C	Lce3e	c.236G>C	p.Arg79Pro	missense_variant	MODERATE	60	0	0.016	32	6	0.226	2.89591
Aplan_7298_NR_1000nM_C2_vs_Aplan_7298_NR_Parent	chr3	95170120	95170120	G	C	Sema6c	c.1242G>C	p.Pro414Pro	synonymous_variant	LOW	170	0	0.006612	110	23	0.226	7.01583
Aplan_7298_NR_1000nM_C2_vs_Aplan_7298_NR_Parent	chr3	95240014	95240014	C	G	Gm128	c.968G>C	p.Arg323Pro	missense_variant	MODERATE	65	0	0.019	30	6	0.235	3.16545
Aplan_7298_NR_1000nM_C2_vs_Aplan_7298_NR_Parent	chr3	96527120	96527120	G	C	Hfe2	c.174G>C	p.Thr58Thr	synonymous_variant	LOW	51	1	0.026	40	11	0.289	3.40738
Aplan_7298_NR_1000nM_C2_vs_Aplan_7298_NR_Parent	chr3	101003772	101003772	C	G	Cd101	c.2581G>C	p.Ala861Pro	missense_variant	MODERATE	85	0	0.012	50	14	0.261	6.60911
Aplan_7298_NR_1000nM_C2_vs_Aplan_7298_NR_Parent	chr3	101013351	101013351	C	G	Cd101	c.1243G>C	p.Val415Leu	missense_variant	MODERATE	36	0	0.029	31	7	0.25	2.51946
Aplan_7298_NR_1000nM_C2_vs_Aplan_7298_NR_Parent	chr3	101435541	101435541	G	C	Igsf3	c.1433G>C	p.Arg478Pro	missense_variant	MODERATE	74	0	0.014	28	5	0.207	2.92814
Aplan_7298_NR_1000nM_C2_vs_Aplan_7298_NR_Parent	chr3	103736953	103736953	C	G	Olfml3	c.399G>C	p.Thr133Thr	splice_region_variant&synonymous_variant	LOW	99	0	0.011	71	14	0.209	5.66548
Aplan_7298_NR_1000nM_C2_vs_Aplan_7298_NR_Parent	chr3	103809014	103809014	C	G	Dclre1b	c.75G>C	p.Arg25Arg	synonymous_variant	LOW	47	0	0.023	23	10	0.394	5.54002
Aplan_7298_NR_1000nM_C2_vs_Aplan_7298_NR_Parent	chr3	104034126	104034126	G	C	Magi3	c.2512C>G	p.Arg838Gly	missense_variant	MODERATE	29	0	0.036	44	9	0.25	2.02915
Aplan_7298_NR_1000nM_C2_vs_Aplan_7298_NR_Parent	chr3	104465630	104465630	G	C	Lrig2	c.1934C>G	p.Ala645Gly	missense_variant	MODERATE	75	0	0.015	38	8	0.216	4.01969
Aplan_7298_NR_1000nM_C2_vs_Aplan_7298_NR_Parent	chr3	105904942	105904942	C	G	Adora3	c.143C>G	p.Thr48Arg	missense_variant	MODERATE	48	0	0.022	27	7	0.296	3.3493
Aplan_7298_NR_1000nM_C2_vs_Aplan_7298_NR_Parent	chr3	105907464	105907464	T	A	Adora3	c.529T>A	p.Tyr177Asn	missense_variant	MODERATE	147	1	0.015	107	26	0.232	6.55901
Aplan_7298_NR_1000nM_C2_vs_Aplan_7298_NR_Parent	chr3	107213475	107213475	G	C	Cym	c.813C>G	p.Ala271Ala	synonymous_variant	LOW	40	0	0.025	40	12	0.333	3.73174
Aplan_7298_NR_1000nM_C2_vs_Aplan_7298_NR_Parent	chr3	107219683	107219683	C	G	Cym	c.155G>C	p.Ser52Thr	missense_variant	MODERATE	54	0	0.021	42	12	0.27	4.75197
Aplan_7298_NR_1000nM_C2_vs_Aplan_7298_NR_Parent	chr3	108079192	108079192	C	G	Ampd2	c.853G>C	p.Asp285His	missense_variant	MODERATE	97	0	0.012	57	20	0.346	6.62594
Aplan_7298_NR_1000nM_C2_vs_Aplan_7298_NR_Parent	chr3	108187306	108187306	C	G	Amigo1	c.120C>G	p.Cys40Trp	missense_variant	MODERATE	115	0	0.009179	79	21	0.26	6.06214
Aplan_7298_NR_1000nM_C2_vs_Aplan_7298_NR_Parent	chr3	109112185	109112185	T	C	Slc25a54	c.1098+6T>C		splice_region_variant&intron_variant	LOW	41	0	0.025	33	8	0.266	3.03564
Aplan_7298_NR_1000nM_C2_vs_Aplan_7298_NR_Parent	chr3	121463504	121463504	G	C	Slc44a3	c.1539C>G	p.Ser513Ser	synonymous_variant	LOW	64	0	0.017	65	20	0.309	6.47023
Aplan_7298_NR_1000nM_C2_vs_Aplan_7298_NR_Parent	chr3	129868289	129868289	C	G	Cfi	c.1086C>G	p.Ile362Met	missense_variant	MODERATE	26	0	0.037	24	7	0.303	2.46029
Aplan_7298_NR_1000nM_C2_vs_Aplan_7298_NR_Parent	chr3	135608169	135608169	G	C	Nfkb1	c.1184C>G	p.Thr395Ser	missense_variant	MODERATE	66	0	0.017	49	9	0.208	3.53439
Aplan_7298_NR_1000nM_C2_vs_Aplan_7298_NR_Parent	chr3	142630627	142630627	G	C	Gbp2	c.737G>C	p.Ser246Thr	missense_variant	MODERATE	49	0	0.023	38	8	0.243	3.07732
Aplan_7298_NR_1000nM_C2_vs_Aplan_7298_NR_Parent	chr3	146097185	146097185	G	C	Wdr63	c.250C>G	p.Arg84Gly	missense_variant	MODERATE	65	2	0.021	63	11	0.2	2.08646
Aplan_7298_NR_1000nM_C2_vs_Aplan_7298_NR_Parent	chr4	3870800	3870800	G	C	Mos	c.1015C>G	p.Arg339Gly	missense_variant	MODERATE	50	0	0.023	40	8	0.243	3.00344
Aplan_7298_NR_1000nM_C2_vs_Aplan_7298_NR_Parent	chr4	11386379	11386379	C	G	Esrp1	c.58G>C	p.Gly20Arg	missense_variant	MODERATE	71	0	0.016	68	14	0.221	4.67707
Aplan_7298_NR_1000nM_C2_vs_Aplan_7298_NR_Parent	chr4	21796898	21796898	G	C	Usp45	c.591G>C	p.Gly197Gly	synonymous_variant	LOW	30	0	0.035	36	12	0.345	3.56571
Aplan_7298_NR_1000nM_C2_vs_Aplan_7298_NR_Parent	chr4	33500346	33500346	C	G	Rngtt	c.1739C>G	p.Pro580Arg	missense_variant	MODERATE	36	0	0.031	25	11	0.422	4.97219
Aplan_7298_NR_1000nM_C2_vs_Aplan_7298_NR_Parent	chr4	45815564	45815564	C	G	Igfbpl1	c.571G>C	p.Glu191Gln	missense_variant	MODERATE	46	0	0.027	32	7	0.249	2.89482
Aplan_7298_NR_1000nM_C2_vs_Aplan_7298_NR_Parent	chr4	45900233	45900233	C	G	Ccdc180	c.714C>G	p.Asp238Glu	missense_variant	MODERATE	53	0	0.02	28	7	0.241	3.46787
Aplan_7298_NR_1000nM_C2_vs_Aplan_7298_NR_Parent	chr4	46507302	46507302	C	G	Trim14	c.913G>C	p.Ala305Pro	missense_variant	MODERATE	19	0	0.056	10	5	0.455	2.67325
Aplan_7298_NR_1000nM_C2_vs_Aplan_7298_NR_Parent	chr4	46564719	46564719	C	G	Coro2a	c.26G>C	p.Arg9Pro	missense_variant	MODERATE	48	0	0.023	48	12	0.304	3.65158
Aplan_7298_NR_1000nM_C2_vs_Aplan_7298_NR_Parent	chr4	48051256	48051256	C	T	Nr4a3	c.9C>T	p.Cys3Cys	synonymous_variant	LOW	28	0	0.039	18	6	0.304	2.70292
Aplan_7298_NR_1000nM_C2_vs_Aplan_7298_NR_Parent	chr4	48663874	48663874	G	C	Murc	c.253G>C	p.Val85Leu	missense_variant	MODERATE	61	0	0.017	34	9	0.273	4.35028
Aplan_7298_NR_1000nM_C2_vs_Aplan_7298_NR_Parent	chr4	63432764	63432764	G	C	Whrn	c.1320C>G	p.Arg440Arg	synonymous_variant	LOW	25	0	0.042	21	8	0.335	3.10799
Aplan_7298_NR_1000nM_C2_vs_Aplan_7298_NR_Parent	chr4	82965982	82965982	G	C	Frem1	c.3732C>G	p.Ser1244Ser	synonymous_variant	LOW	55	1	0.024	43	14	0.293	4.6122
Aplan_7298_NR_1000nM_C2_vs_Aplan_7298_NR_Parent	chr4	99221458	99221458	G	C	Atg4c	c.661G>C	p.Gly221Arg	missense_variant	MODERATE	52	0	0.021	22	8	0.362	4.67332
Aplan_7298_NR_1000nM_C2_vs_Aplan_7298_NR_Parent	chr4	99967212	99967212	C	G	Pgm2	c.1027C>G	p.Arg343Gly	missense_variant&splice_region_variant	MODERATE	132	0	0.0086	85	29	0.365	6.32388
Aplan_7298_NR_1000nM_C2_vs_Aplan_7298_NR_Parent	chr4	102966201	102966201	G	C	Sgip1	c.2162G>C	p.Arg721Pro	missense_variant	MODERATE	62	0	0.019	43	9	0.256	3.72663
Aplan_7298_NR_1000nM_C2_vs_Aplan_7298_NR_Parent	chr4	106444819	106444819	C	G	Pcsk9	c.1730G>C	p.Arg577Pro	missense_variant	MODERATE	32	0	0.031	20	6	0.318	2.72036
Aplan_7298_NR_1000nM_C2_vs_Aplan_7298_NR_Parent	chr4	107106980	107106980	G	C	Cdcp2	c.1026G>C	p.Pro342Pro	synonymous_variant	LOW	89	0	0.012	58	15	0.271	6.59879
Aplan_7298_NR_1000nM_C2_vs_Aplan_7298_NR_Parent	chr4	115918197	115918197	G	C	Dmbx1	c.900C>G	p.Ala300Ala	synonymous_variant	LOW	37	0	0.028	23	7	0.291	3.19738
Aplan_7298_NR_1000nM_C2_vs_Aplan_7298_NR_Parent	chr4	116310483	116310483	G	C	Mast2	c.3176C>G	p.Thr1059Arg	missense_variant	MODERATE	41	0	0.025	31	8	0.283	3.18105
Aplan_7298_NR_1000nM_C2_vs_Aplan_7298_NR_Parent	chr4	116802696	116802696	G	A	Tesk2	c.1097G>A	p.Arg366Gln	missense_variant	MODERATE	89	0	0.013	49	14	0.28	6.89223
Aplan_7298_NR_1000nM_C2_vs_Aplan_7298_NR_Parent	chr4	117028533	117028533	C	G	Eif2b3	c.271C>G	p.Arg91Gly	missense_variant	MODERATE	49	0	0.021	37	9	0.265	3.56779
Aplan_7298_NR_1000nM_C2_vs_Aplan_7298_NR_Parent	chr4	117154736	117154736	C	G	Rps8	c.289G>C	p.Val97Leu	missense_variant	MODERATE	159	0	0.00701	109	24	0.225	5.98742
Aplan_7298_NR_1000nM_C2_vs_Aplan_7298_NR_Parent	chr4	117760765	117760765	G	C	Klf17	c.394C>G	p.Arg132Gly	missense_variant	MODERATE	46	0	0.021	45	9	0.225	2.94667
Aplan_7298_NR_1000nM_C2_vs_Aplan_7298_NR_Parent	chr4	117933079	117933079	G	C	St3gal3	c.1093C>G	p.Arg365Gly	missense_variant	MODERATE	51	0	0.022	40	12	0.297	4.75184
Aplan_7298_NR_1000nM_C2_vs_Aplan_7298_NR_Parent	chr4	118571724	118571724	G	C	Cfap57	c.3044C>G	p.Thr1015Arg	missense_variant	MODERATE	45	0	0.025	26	10	0.387	4.93916
Aplan_7298_NR_1000nM_C2_vs_Aplan_7298_NR_Parent	chr4	122959321	122959321	G	C	Mfsd2a	c.174C>G	p.Thr58Thr	synonymous_variant	LOW	35	0	0.031	25	10	0.409	4.36295
Aplan_7298_NR_1000nM_C2_vs_Aplan_7298_NR_Parent	chr4	123322720	123322720	G	C	Oxct2a	c.867C>G	p.Pro289Pro	synonymous_variant	LOW	64	0	0.016	49	14	0.294	5.60866
Aplan_7298_NR_1000nM_C2_vs_Aplan_7298_NR_Parent	chr4	123322976	123322976	C	G	Oxct2a	c.611G>C	p.Arg204Pro	missense_variant	MODERATE	52	0	0.02	32	7	0.212	3.12894
Aplan_7298_NR_1000nM_C2_vs_Aplan_7298_NR_Parent	chr4	123351816	123351816	G	C	Macf1	c.21811+6C>G		splice_region_variant&intron_variant	LOW	26	0	0.038	22	6	0.261	2.21608
Aplan_7298_NR_1000nM_C2_vs_Aplan_7298_NR_Parent	chr4	123475704	123475704	G	C	Macf1	c.5263C>G	p.Arg1755Gly	missense_variant	MODERATE	186	0	0.006288	136	35	0.234	6.12584
Aplan_7298_NR_1000nM_C2_vs_Aplan_7298_NR_Parent	chr4	126233602	126233602	G	C	Map7d1	c.2193C>G	p.Ala731Ala	synonymous_variant	LOW	331	0	0.003431	187	43	0.216	5.9244
Aplan_7298_NR_1000nM_C2_vs_Aplan_7298_NR_Parent	chr4	126236718	126236718	C	G	Map7d1	c.1294G>C	p.Ala432Pro	missense_variant	MODERATE	25	0	0.041	24	5	0.201	1.65189
Aplan_7298_NR_1000nM_C2_vs_Aplan_7298_NR_Parent	chr4	127988128	127988128	G	C	Csmd2	c.59G>C	p.Arg20Pro	missense_variant	MODERATE	23	0	0.052	13	7	0.57	3.68705
Aplan_7298_NR_1000nM_C2_vs_Aplan_7298_NR_Parent	chr4	128708035	128708035	G	A	Phc2	c.282G>A	p.Ala94Ala	synonymous_variant	LOW	37	0	0.03	22	8	0.384	3.84102
Aplan_7298_NR_1000nM_C2_vs_Aplan_7298_NR_Parent	chr4	129224129	129224129	G	C	C77080	c.876C>G	p.Ile292Met	missense_variant	MODERATE	57	0	0.019	34	7	0.235	3.17741
Aplan_7298_NR_1000nM_C2_vs_Aplan_7298_NR_Parent	chr4	129577077	129577077	G	C	Fam167b	c.477C>G	p.Phe159Leu	missense_variant	MODERATE	48	0	0.022	42	11	0.262	3.98764
Aplan_7298_NR_1000nM_C2_vs_Aplan_7298_NR_Parent	chr4	130137532	130137532	G	C	Hcrtr1	c.97C>G	p.Arg33Gly	missense_variant	MODERATE	22	0	0.045	10	5	0.444	2.90261
Aplan_7298_NR_1000nM_C2_vs_Aplan_7298_NR_Parent	chr4	131818972	131818972	G	C	Ptpru	c.966C>G	p.Ile322Met	missense_variant	MODERATE	51	0	0.022	23	8	0.335	4.48768
Aplan_7298_NR_1000nM_C2_vs_Aplan_7298_NR_Parent	chr4	132113864	132113864	C	G	Oprd1	c.782G>C	p.Arg261Pro	missense_variant	MODERATE	75	0	0.014	39	12	0.334	6.14991
Aplan_7298_NR_1000nM_C2_vs_Aplan_7298_NR_Parent	chr4	132339228	132339228	G	C	Rcc1	c.87C>G	p.Arg29Arg	synonymous_variant	LOW	44	0	0.024	21	5	0.272	2.60843
Aplan_7298_NR_1000nM_C2_vs_Aplan_7298_NR_Parent	chr4	133061930	133061930	G	A	Ahdc1	c.481G>A	p.Asp161Asn	missense_variant	MODERATE	49	0	0.022	36	11	0.312	4.55036
Aplan_7298_NR_1000nM_C2_vs_Aplan_7298_NR_Parent	chr4	133210695	133210695	C	G	Gpr3	c.665G>C	p.Arg222Pro	missense_variant	MODERATE	68	0	0.015	49	13	0.251	5.37242
Aplan_7298_NR_1000nM_C2_vs_Aplan_7298_NR_Parent	chr4	133211145	133211145	C	G	Gpr3	c.215G>C	p.Arg72Pro	missense_variant	MODERATE	61	0	0.018	52	15	0.298	5.60626
Aplan_7298_NR_1000nM_C2_vs_Aplan_7298_NR_Parent	chr4	133246738	133246738	G	C	Map3k6	c.1527G>C	p.Leu509Leu	synonymous_variant	LOW	84	0	0.013	74	16	0.211	5.68894
Aplan_7298_NR_1000nM_C2_vs_Aplan_7298_NR_Parent	chr4	134081466	134081466	G	C	Aim1l	c.3323G>C	p.Arg1108Pro	missense_variant	MODERATE	52	0	0.02	45	14	0.319	5.22425
Aplan_7298_NR_1000nM_C2_vs_Aplan_7298_NR_Parent	chr4	135785930	135785930	C	G	Myom3	c.1918C>G	p.Arg640Gly	missense_variant	MODERATE	47	0	0.023	23	5	0.261	2.55592
Aplan_7298_NR_1000nM_C2_vs_Aplan_7298_NR_Parent	chr4	135917509	135917509	C	G	Cnr2	c.897C>G	p.Tyr299*	stop_gained	HIGH	77	0	0.013	44	13	0.311	6.2765
Aplan_7298_NR_1000nM_C2_vs_Aplan_7298_NR_Parent	chr4	136238423	136238423	C	G	Asap3	c.1243C>G	p.Arg415Gly	missense_variant	MODERATE	48	0	0.023	25	9	0.384	4.67688
Aplan_7298_NR_1000nM_C2_vs_Aplan_7298_NR_Parent	chr4	138289270	138289270	C	G	Kif17	c.1974C>G	p.Ser658Arg	missense_variant	MODERATE	69	0	0.018	52	11	0.229	4.32504
Aplan_7298_NR_1000nM_C2_vs_Aplan_7298_NR_Parent	chr4	138967621	138967621	G	C	Rnf186	c.471G>C	p.Ala157Ala	synonymous_variant	LOW	105	0	0.011	66	16	0.285	7.16072
Aplan_7298_NR_1000nM_C2_vs_Aplan_7298_NR_Parent	chr4	140715934	140715934	C	G	Rcc2	c.922C>G	p.Arg308Gly	missense_variant	MODERATE	45	0	0.024	31	8	0.291	3.37844
Aplan_7298_NR_1000nM_C2_vs_Aplan_7298_NR_Parent	chr4	140715993	140715993	C	A	Rcc2	c.981C>A	p.Asn327Lys	missense_variant	MODERATE	58	0	0.019	35	9	0.279	4.13425
Aplan_7298_NR_1000nM_C2_vs_Aplan_7298_NR_Parent	chr4	140732330	140732330	C	G	Padi6	c.1213G>C	p.Gly405Arg	missense_variant	MODERATE	47	1	0.026	33	11	0.311	3.80445
Aplan_7298_NR_1000nM_C2_vs_Aplan_7298_NR_Parent	chr4	141317174	141317174	G	C	Epha2	c.1286G>C	p.Arg429Pro	missense_variant	MODERATE	28	0	0.035	24	6	0.272	2.17971
Aplan_7298_NR_1000nM_C2_vs_Aplan_7298_NR_Parent	chr4	141473225	141473225	G	C	Spen	c.8090C>G	p.Thr2697Arg	missense_variant	MODERATE	56	0	0.018	27	6	0.241	3.10555
Aplan_7298_NR_1000nM_C2_vs_Aplan_7298_NR_Parent	chr4	141905019	141905019	G	C	Fhad1	c.3808C>G	p.Arg1270Gly	missense_variant	MODERATE	97	0	0.012	59	13	0.221	5.88598
Aplan_7298_NR_1000nM_C2_vs_Aplan_7298_NR_Parent	chr4	143810340	143810340	C	A	Gm13084	c.1420G>T	p.Gly474Trp	missense_variant	MODERATE	104	0	0.01	77	19	0.253	6.1424
Aplan_7298_NR_1000nM_C2_vs_Aplan_7298_NR_Parent	chr4	145164629	145164629	C	G	Vps13d	c.1655G>C	p.Arg552Pro	missense_variant	MODERATE	35	1	0.036	27	6	0.204	1.43717
Aplan_7298_NR_1000nM_C2_vs_Aplan_7298_NR_Parent	chr4	149226350	149226350	C	G	Kif1b	c.2122G>C	p.Glu708Gln	missense_variant	MODERATE	51	0	0.024	26	8	0.304	4.12933
Aplan_7298_NR_1000nM_C2_vs_Aplan_7298_NR_Parent	chr4	149629374	149629374	C	G	Clstn1	c.512C>G	p.Ala171Gly	missense_variant	MODERATE	27	0	0.036	23	9	0.366	3.48656
Aplan_7298_NR_1000nM_C2_vs_Aplan_7298_NR_Parent	chr4	150101632	150101632	G	A	Gpr157	c.650G>A	p.Arg217Gln	missense_variant	MODERATE	106	0	0.011	77	17	0.246	6.88701
Aplan_7298_NR_1000nM_C2_vs_Aplan_7298_NR_Parent	chr4	151042756	151042756	C	G	Per3	c.307G>C	p.Gly103Arg	missense_variant	MODERATE	51	0	0.023	28	5	0.222	2.36044
Aplan_7298_NR_1000nM_C2_vs_Aplan_7298_NR_Parent	chr4	152282914	152282914	C	G	Gpr153	c.1221C>G	p.Ala407Ala	synonymous_variant	LOW	25	0	0.043	13	5	0.389	2.59107
Aplan_7298_NR_1000nM_C2_vs_Aplan_7298_NR_Parent	chr4	154340840	154340840	G	C	Prdm16	c.2487C>G	p.Tyr829*	stop_gained	HIGH	57	0	0.018	26	9	0.307	5.022
Aplan_7298_NR_1000nM_C2_vs_Aplan_7298_NR_Parent	chr4	154893851	154893851	G	C	Mmel1	c.1849G>C	p.Gly617Arg	missense_variant	MODERATE	97	0	0.011	61	17	0.254	6.133
Aplan_7298_NR_1000nM_C2_vs_Aplan_7298_NR_Parent	chr4	155770621	155770621	G	C	Vwa1	c.955C>G	p.Arg319Gly	missense_variant	MODERATE	35	0	0.031	22	8	0.348	3.71328
Aplan_7298_NR_1000nM_C2_vs_Aplan_7298_NR_Parent	chr4	156172867	156172867	G	C	Agrn	c.3505C>G	p.Arg1169Gly	missense_variant	MODERATE	93	0	0.012	45	15	0.341	6.43861
Aplan_7298_NR_1000nM_C2_vs_Aplan_7298_NR_Parent	chr5	4755657	4755657	C	G	Fzd1	c.1924G>C	p.Val642Leu	missense_variant	MODERATE	84	0	0.013	43	9	0.23	4.4973
Aplan_7298_NR_1000nM_C2_vs_Aplan_7298_NR_Parent	chr5	7976742	7976742	C	G	Steap4	c.704C>G	p.Thr235Arg	missense_variant	MODERATE	114	0	0.01	67	20	0.313	6.494
Aplan_7298_NR_1000nM_C2_vs_Aplan_7298_NR_Parent	chr5	20919550	20919550	G	C	Rsbn1l	c.1253C>G	p.Thr418Arg	missense_variant	MODERATE	76	0	0.014	73	19	0.272	5.9513
Aplan_7298_NR_1000nM_C2_vs_Aplan_7298_NR_Parent	chr5	21773793	21773793	G	C	Dnajc2	c.638C>G	p.Ala213Gly	missense_variant	MODERATE	76	1	0.016	51	13	0.257	4.61611
Aplan_7298_NR_1000nM_C2_vs_Aplan_7298_NR_Parent	chr5	23819459	23819459	C	G	Rint1	c.2258C>G	p.Ser753*	stop_gained	HIGH	69	0	0.016	61	15	0.228	5.37962
Aplan_7298_NR_1000nM_C2_vs_Aplan_7298_NR_Parent	chr5	24324957	24324957	G	C	Kcnh2	c.2150C>G	p.Ala717Gly	missense_variant&splice_region_variant	MODERATE	42	0	0.025	28	5	0.207	2.09043
Aplan_7298_NR_1000nM_C2_vs_Aplan_7298_NR_Parent	chr5	24591358	24591358	G	C	Chpf2	c.1301G>C	p.Arg434Pro	missense_variant	MODERATE	66	0	0.016	36	9	0.258	4.38612
Aplan_7298_NR_1000nM_C2_vs_Aplan_7298_NR_Parent	chr5	30864578	30864578	G	C	Mapre3	c.474G>C	p.Pro158Pro	synonymous_variant	LOW	125	0	0.009271	79	22	0.288	6.91864
Aplan_7298_NR_1000nM_C2_vs_Aplan_7298_NR_Parent	chr5	31072879	31072879	C	G	Cad	c.4625C>G	p.Ala1542Gly	missense_variant	MODERATE	52	0	0.019	49	19	0.357	6.23351
Aplan_7298_NR_1000nM_C2_vs_Aplan_7298_NR_Parent	chr5	31077437	31077437	C	G	Cad	c.6309C>G	p.Tyr2103*	stop_gained	HIGH	38	0	0.026	28	6	0.25	2.38233
Aplan_7298_NR_1000nM_C2_vs_Aplan_7298_NR_Parent	chr5	34236011	34236011	C	G	Zfyve28	c.310G>C	p.Gly104Arg	missense_variant	MODERATE	42	0	0.024	21	6	0.332	3.09765
Aplan_7298_NR_1000nM_C2_vs_Aplan_7298_NR_Parent	chr5	34562441	34562441	C	G	Sh3bp2	c.1793C>G	p.Pro598Arg	missense_variant	MODERATE	18	0	0.056	26	7	0.304	1.5144
Aplan_7298_NR_1000nM_C2_vs_Aplan_7298_NR_Parent	chr5	34923421	34923421	C	G	Msantd1	c.694C>G	p.Arg232Gly	missense_variant	MODERATE	25	0	0.044	16	9	0.558	4.48607
Aplan_7298_NR_1000nM_C2_vs_Aplan_7298_NR_Parent	chr5	35280834	35280834	G	C	Adra2c	c.949G>C	p.Gly317Arg	missense_variant	MODERATE	16	0	0.056	15	6	0.375	2.16764
Aplan_7298_NR_1000nM_C2_vs_Aplan_7298_NR_Parent	chr5	39614744	39614744	G	C	Hs3st1	c.555C>G	p.Asp185Glu	missense_variant	MODERATE	60	0	0.017	42	8	0.231	3.26904
Aplan_7298_NR_1000nM_C2_vs_Aplan_7298_NR_Parent	chr5	41813188	41813188	C	G	Bod1l	c.7846G>C	p.Glu2616Gln	missense_variant	MODERATE	166	0	0.007129	143	31	0.214	5.83936
Aplan_7298_NR_1000nM_C2_vs_Aplan_7298_NR_Parent	chr5	41819499	41819499	G	C	Bod1l	c.4471C>G	p.Arg1491Gly	missense_variant	MODERATE	259	0	0.004459	208	48	0.212	6.0279
Aplan_7298_NR_1000nM_C2_vs_Aplan_7298_NR_Parent	chr5	43237468	43237468	G	C	Cpeb2	c.1788G>C	p.Ser596Ser	synonymous_variant	LOW	50	0	0.022	45	9	0.205	3.12252
Aplan_7298_NR_1000nM_C2_vs_Aplan_7298_NR_Parent	chr5	45553124	45553124	G	C	Fam184b	c.1663C>G	p.Arg555Gly	missense_variant	MODERATE	80	0	0.013	78	19	0.253	5.93732
Aplan_7298_NR_1000nM_C2_vs_Aplan_7298_NR_Parent	chr5	66026841	66026841	G	C	Rbm47	c.418C>G	p.Arg140Gly	missense_variant	MODERATE	59	0	0.017	31	7	0.225	3.45352
Aplan_7298_NR_1000nM_C2_vs_Aplan_7298_NR_Parent	chr5	66283693	66283693	G	C	Nsun7	c.1156G>C	p.Gly386Arg	missense_variant	MODERATE	44	0	0.024	40	16	0.394	6.00699
Aplan_7298_NR_1000nM_C2_vs_Aplan_7298_NR_Parent	chr5	72301603	72301603	G	C	Corin	c.3225C>G	p.Ser1075Ser	synonymous_variant	LOW	36	0	0.029	28	7	0.249	2.71988
Aplan_7298_NR_1000nM_C2_vs_Aplan_7298_NR_Parent	chr5	72619037	72619037	G	C	Cnga1	c.82C>G	p.Arg28Gly	missense_variant	MODERATE	87	0	0.013	65	21	0.326	7.07893
Aplan_7298_NR_1000nM_C2_vs_Aplan_7298_NR_Parent	chr5	76902027	76902027	C	G	Aasdh	c.121G>C	p.Ala41Pro	missense_variant	MODERATE	47	0	0.025	23	9	0.428	4.90081
Aplan_7298_NR_1000nM_C2_vs_Aplan_7298_NR_Parent	chr5	87081051	87081051	C	G	Ugt2b36	c.1132G>C	p.Ala378Pro	missense_variant	MODERATE	186	0	0.00605	123	33	0.28	6.18744
Aplan_7298_NR_1000nM_C2_vs_Aplan_7298_NR_Parent	chr5	89028299	89028299	C	G	Slc4a4	c.260C>G	p.Pro87Arg	missense_variant	MODERATE	63	0	0.017	46	11	0.219	4.45882
Aplan_7298_NR_1000nM_C2_vs_Aplan_7298_NR_Parent	chr5	92392617	92392617	C	A	Art3	c.218C>A	p.Ala73Glu	missense_variant	MODERATE	60	0	0.02	35	10	0.294	4.74071
Aplan_7298_NR_1000nM_C2_vs_Aplan_7298_NR_Parent	chr5	92393026	92393026	C	G	Art3	c.627C>G	p.Ala209Ala	synonymous_variant	LOW	28	0	0.036	22	9	0.435	3.70216
Aplan_7298_NR_1000nM_C2_vs_Aplan_7298_NR_Parent	chr5	97392141	97392141	C	G	Naa11	c.157G>C	p.Val53Leu	missense_variant	MODERATE	93	0	0.011	62	14	0.222	5.99794
Aplan_7298_NR_1000nM_C2_vs_Aplan_7298_NR_Parent	chr5	100673990	100673990	T	G	Coq2	c.252A>C	p.Ile84Ile	splice_region_variant&synonymous_variant	LOW	11	1	0.091	9	5	0.43	1.30238
Aplan_7298_NR_1000nM_C2_vs_Aplan_7298_NR_Parent	chr5	102892411	102892411	C	G	Arhgap24	c.1492C>G	p.Arg498Gly	missense_variant	MODERATE	84	0	0.013	57	22	0.389	6.83774
Aplan_7298_NR_1000nM_C2_vs_Aplan_7298_NR_Parent	chr5	104337717	104337717	C	G	Mepe	c.722C>G	p.Pro241Arg	missense_variant	MODERATE	49	0	0.023	43	16	0.386	6.07518
Aplan_7298_NR_1000nM_C2_vs_Aplan_7298_NR_Parent	chr5	105480140	105480140	C	T	Lrrc8b	c.351C>T	p.Phe117Phe	synonymous_variant	LOW	86	0	0.012	68	17	0.242	6.58603
Aplan_7298_NR_1000nM_C2_vs_Aplan_7298_NR_Parent	chr5	107378068	107378068	G	C	Brdt	c.2786G>C	p.Arg929Pro	missense_variant	MODERATE	50	0	0.021	16	6	0.416	4.05484
Aplan_7298_NR_1000nM_C2_vs_Aplan_7298_NR_Parent	chr5	108584270	108584270	G	C	Gak	c.2351C>G	p.Thr784Arg	missense_variant	MODERATE	32	0	0.033	29	6	0.27	2.06778
Aplan_7298_NR_1000nM_C2_vs_Aplan_7298_NR_Parent	chr5	109340134	109340134	G	C	Vmn2r16	c.872G>C	p.Arg291Pro	missense_variant	MODERATE	286	1	0.004194	217	51	0.249	5.933
Aplan_7298_NR_1000nM_C2_vs_Aplan_7298_NR_Parent	chr5	110234598	110234598	G	C	Ankle2	c.439G>C	p.Gly147Arg	missense_variant	MODERATE	66	0	0.016	41	12	0.291	5.49669
Aplan_7298_NR_1000nM_C2_vs_Aplan_7298_NR_Parent	chr5	111183053	111183053	C	G	Ttc28	c.1045C>G	p.Arg349Gly	missense_variant	MODERATE	50	0	0.02	35	15	0.454	6.74329
Aplan_7298_NR_1000nM_C2_vs_Aplan_7298_NR_Parent	chr5	111223939	111223939	C	G	Ttc28	c.2253C>G	p.Tyr751*	stop_gained	HIGH	74	0	0.015	37	7	0.208	3.51837
Aplan_7298_NR_1000nM_C2_vs_Aplan_7298_NR_Parent	chr5	111277162	111277162	G	C	Ttc28	c.4759G>C	p.Glu1587Gln	missense_variant	MODERATE	56	0	0.019	46	15	0.333	5.83356
Aplan_7298_NR_1000nM_C2_vs_Aplan_7298_NR_Parent	chr5	112450309	112450309	C	G	Gm6588	c.721C>G	p.Arg241Gly	missense_variant	MODERATE	57	0	0.018	48	16	0.334	6.14255
Aplan_7298_NR_1000nM_C2_vs_Aplan_7298_NR_Parent	chr5	112955232	112955232	C	G	Adrbk2	c.579G>C	p.Val193Val	synonymous_variant	LOW	160	0	0.007226	77	17	0.222	7.2149
Aplan_7298_NR_1000nM_C2_vs_Aplan_7298_NR_Parent	chr5	113062067	113062067	G	T	Crybb2	c.429C>A	p.Ser143Ser	synonymous_variant	LOW	80	0	0.015	46	12	0.287	5.6993
Aplan_7298_NR_1000nM_C2_vs_Aplan_7298_NR_Parent	chr5	113280366	113280366	G	C	Sgsm1	c.955C>G	p.Arg319Gly	missense_variant	MODERATE	73	0	0.015	46	12	0.302	5.38713
Aplan_7298_NR_1000nM_C2_vs_Aplan_7298_NR_Parent	chr5	114786785	114786785	C	T	Ankrd13a	c.330C>T	p.Pro110Pro	synonymous_variant	LOW	92	0	0.012	42	10	0.231	5.39412
Aplan_7298_NR_1000nM_C2_vs_Aplan_7298_NR_Parent	chr5	115551525	115551525	C	G	Pxn	c.869C>G	p.Pro290Arg	missense_variant	MODERATE	26	0	0.042	14	8	0.5	4.4084
Aplan_7298_NR_1000nM_C2_vs_Aplan_7298_NR_Parent	chr5	116453549	116453549	G	C	Srrm4	c.930C>G	p.Pro310Pro	synonymous_variant	LOW	183	0	0.00661	96	28	0.298	6.22801
Aplan_7298_NR_1000nM_C2_vs_Aplan_7298_NR_Parent	chr5	119672141	119672141	C	G	Tbx3	c.126C>G	p.Pro42Pro	synonymous_variant	LOW	29	0	0.035	19	6	0.333	2.65542
Aplan_7298_NR_1000nM_C2_vs_Aplan_7298_NR_Parent	chr5	120735014	120735014	G	C	Oas2	c.1975C>G	p.Arg659Gly	missense_variant	MODERATE	66	0	0.019	36	8	0.258	3.86016
Aplan_7298_NR_1000nM_C2_vs_Aplan_7298_NR_Parent	chr5	120788762	120788762	C	G	Oas1e	c.879G>C	p.Leu293Leu	synonymous_variant	LOW	74	0	0.015	39	10	0.265	4.98973
Aplan_7298_NR_1000nM_C2_vs_Aplan_7298_NR_Parent	chr5	121626213	121626213	G	C	Acad10	c.2652C>G	p.His884Gln	missense_variant	MODERATE	53	0	0.02	48	10	0.229	3.46796
Aplan_7298_NR_1000nM_C2_vs_Aplan_7298_NR_Parent	chr5	122888648	122888648	C	G	Kdm2b	c.1760G>C	p.Arg587Pro	missense_variant	MODERATE	49	0	0.023	29	6	0.233	2.73297
Aplan_7298_NR_1000nM_C2_vs_Aplan_7298_NR_Parent	chr5	123447185	123447185	C	G	Mlxip	c.1755C>G	p.Phe585Leu	missense_variant	MODERATE	62	0	0.017	30	8	0.266	4.20149
Aplan_7298_NR_1000nM_C2_vs_Aplan_7298_NR_Parent	chr5	123481782	123481782	C	G	Il31	c.88G>C	p.Gly30Arg	missense_variant	MODERATE	54	0	0.021	39	12	0.325	5.02743
Aplan_7298_NR_1000nM_C2_vs_Aplan_7298_NR_Parent	chr5	123501117	123501117	C	G	Lrrc43	c.1208C>G	p.Ser403Trp	missense_variant	MODERATE	48	0	0.024	25	8	0.309	4.09441
Aplan_7298_NR_1000nM_C2_vs_Aplan_7298_NR_Parent	chr5	123801867	123801867	G	C	Kntc1	c.4723G>C	p.Ala1575Pro	missense_variant	MODERATE	115	0	0.009893	79	18	0.244	6.0446
Aplan_7298_NR_1000nM_C2_vs_Aplan_7298_NR_Parent	chr5	124001277	124001277	C	G	Hip1r	c.2732C>G	p.Ala911Gly	missense_variant	MODERATE	58	0	0.018	45	12	0.275	4.72566
Aplan_7298_NR_1000nM_C2_vs_Aplan_7298_NR_Parent	chr5	124006668	124006668	C	G	Vps37b	c.437G>C	p.Arg146Pro	missense_variant	MODERATE	54	0	0.021	45	11	0.256	4.09405
Aplan_7298_NR_1000nM_C2_vs_Aplan_7298_NR_Parent	chr5	124121992	124121992	G	C	Pitpnm2	c.3436C>G	p.Arg1146Gly	missense_variant	MODERATE	42	0	0.023	25	5	0.223	2.25953
Aplan_7298_NR_1000nM_C2_vs_Aplan_7298_NR_Parent	chr5	124374598	124374598	G	A	Sbno1	c.4107C>T	p.Leu1369Leu	synonymous_variant	LOW	147	0	0.007596	100	30	0.331	6.3558
Aplan_7298_NR_1000nM_C2_vs_Aplan_7298_NR_Parent	chr5	124376239	124376239	G	A	Sbno1	c.3892C>T	p.Arg1298Cys	missense_variant	MODERATE	116	0	0.009382	87	24	0.248	6.19514
Aplan_7298_NR_1000nM_C2_vs_Aplan_7298_NR_Parent	chr5	124556828	124556828	G	A	Ddx55	c.318G>A	p.Thr106Thr	synonymous_variant	LOW	86	0	0.013	47	11	0.227	5.33572
Aplan_7298_NR_1000nM_C2_vs_Aplan_7298_NR_Parent	chr5	124607903	124607903	G	C	Tctn2	c.732G>C	p.Pro244Pro	synonymous_variant	LOW	173	0	0.007058	89	24	0.29	6.58554
Aplan_7298_NR_1000nM_C2_vs_Aplan_7298_NR_Parent	chr5	124791693	124791693	G	C	Dnah10	c.7077G>C	p.Pro2359Pro	synonymous_variant	LOW	29	0	0.038	19	5	0.298	2.16808
Aplan_7298_NR_1000nM_C2_vs_Aplan_7298_NR_Parent	chr5	129771491	129771491	G	C	Psph	c.125C>G	p.Ala42Gly	missense_variant	MODERATE	120	0	0.009216	67	14	0.223	6.65814
Aplan_7298_NR_1000nM_C2_vs_Aplan_7298_NR_Parent	chr5	135133663	135133663	C	G	Mlxipl	c.1974+4C>G		splice_region_variant&intron_variant	LOW	114	0	0.009785	66	19	0.333	6.10706
Aplan_7298_NR_1000nM_C2_vs_Aplan_7298_NR_Parent	chr5	137387889	137387889	C	G	Zan	c.15020G>C	p.Arg5007Pro	missense_variant	MODERATE	144	0	0.008062	78	22	0.275	6.55977
Aplan_7298_NR_1000nM_C2_vs_Aplan_7298_NR_Parent	chr5	139267088	139267088	G	C	Get4	c.690G>C	p.Pro230Pro	synonymous_variant	LOW	130	0	0.009167	84	19	0.203	6.73172
Aplan_7298_NR_1000nM_C2_vs_Aplan_7298_NR_Parent	chr5	142528514	142528514	G	C	Papolb	c.1373C>G	p.Thr458Ser	missense_variant	MODERATE	115	0	0.009747	114	30	0.287	5.99224
Aplan_7298_NR_1000nM_C2_vs_Aplan_7298_NR_Parent	chr5	143015725	143015725	G	C	Rnf216	c.2245C>G	p.Arg749Gly	missense_variant	MODERATE	41	0	0.029	23	6	0.318	2.87082
Aplan_7298_NR_1000nM_C2_vs_Aplan_7298_NR_Parent	chr5	143255173	143255173	C	G	Zfp316	c.1090G>C	p.Ala364Pro	missense_variant	MODERATE	16	0	0.058	10	5	0.5	2.41669
Aplan_7298_NR_1000nM_C2_vs_Aplan_7298_NR_Parent	chr5	143373104	143373104	G	C	Grid2ip	c.662G>C	p.Arg221Pro	missense_variant	MODERATE	20	0	0.05	23	6	0.291	1.63986
Aplan_7298_NR_1000nM_C2_vs_Aplan_7298_NR_Parent	chr5	144191199	144191199	G	C	Bhlha15	c.128G>C	p.Arg43Pro	missense_variant	MODERATE	55	0	0.021	41	13	0.312	5.35998
Aplan_7298_NR_1000nM_C2_vs_Aplan_7298_NR_Parent	chr5	144797122	144797122	C	G	Trrap	c.2784C>G	p.Phe928Leu	missense_variant	MODERATE	51	0	0.019	62	16	0.269	4.36515
Aplan_7298_NR_1000nM_C2_vs_Aplan_7298_NR_Parent	chr5	147042302	147042302	C	T	Lnx2	c.139G>A	p.Asp47Asn	missense_variant	MODERATE	90	0	0.013	63	12	0.2	4.91748
Aplan_7298_NR_1000nM_C2_vs_Aplan_7298_NR_Parent	chr5	149285352	149285352	G	C	Alox5ap	c.250G>C	p.Ala84Pro	missense_variant	MODERATE	68	0	0.018	59	23	0.408	6.89955
Aplan_7298_NR_1000nM_C2_vs_Aplan_7298_NR_Parent	chr5	150436910	150436910	G	C	Fry	c.6020G>C	p.Arg2007Pro	missense_variant	MODERATE	47	0	0.023	23	10	0.392	5.54002
Aplan_7298_NR_1000nM_C2_vs_Aplan_7298_NR_Parent	chr6	23247755	23247755	G	C	Fezf1	c.320C>G	p.Ala107Gly	missense_variant	MODERATE	79	0	0.014	36	11	0.3	6.07345
Aplan_7298_NR_1000nM_C2_vs_Aplan_7298_NR_Parent	chr6	23247960	23247960	G	C	Fezf1	c.115C>G	p.Arg39Gly	missense_variant	MODERATE	106	0	0.011	42	11	0.268	6.47487
Aplan_7298_NR_1000nM_C2_vs_Aplan_7298_NR_Parent	chr6	29713457	29713457	G	C	Tspan33	c.382G>C	p.Glu128Gln	missense_variant	MODERATE	102	0	0.012	55	19	0.335	6.58012
Aplan_7298_NR_1000nM_C2_vs_Aplan_7298_NR_Parent	chr6	34758131	34758131	T	G	Cald1	c.1149+7T>G		splice_region_variant&intron_variant	LOW	55	0	0.021	37	10	0.278	4.31598
Aplan_7298_NR_1000nM_C2_vs_Aplan_7298_NR_Parent	chr6	38636395	38636395	C	G	Klrg2	c.672G>C	p.Pro224Pro	synonymous_variant	LOW	70	0	0.017	36	10	0.314	5.098
Aplan_7298_NR_1000nM_C2_vs_Aplan_7298_NR_Parent	chr6	38636726	38636726	C	G	Klrg2	c.341G>C	p.Arg114Pro	missense_variant	MODERATE	25	0	0.04	10	5	0.5	3.10999
Aplan_7298_NR_1000nM_C2_vs_Aplan_7298_NR_Parent	chr6	39662109	39662109	C	G	Braf	c.707G>C	p.Arg236Pro	missense_variant	MODERATE	28	0	0.037	28	5	0.217	1.28855
Aplan_7298_NR_1000nM_C2_vs_Aplan_7298_NR_Parent	chr6	39677445	39677445	C	G	Braf	c.389G>C	p.Arg130Pro	missense_variant	MODERATE	244	1	0.004766	137	39	0.292	6.05648
Aplan_7298_NR_1000nM_C2_vs_Aplan_7298_NR_Parent	chr6	48025513	48025513	G	C	Zfp777	c.1774C>G	p.Gln592Glu	missense_variant	MODERATE	102	0	0.011	63	16	0.268	7.26894
Aplan_7298_NR_1000nM_C2_vs_Aplan_7298_NR_Parent	chr6	48742971	48742971	G	C	Gimap1	c.516G>C	p.Ala172Ala	synonymous_variant	LOW	70	0	0.015	28	7	0.267	4.06759
Aplan_7298_NR_1000nM_C2_vs_Aplan_7298_NR_Parent	chr6	49334171	49334171	C	T	Ccdc126	c.112C>T	p.Arg38Trp	missense_variant	MODERATE	80	0	0.014	45	12	0.278	5.78711
Aplan_7298_NR_1000nM_C2_vs_Aplan_7298_NR_Parent	chr6	52234837	52234837	G	C	Hoxa10	c.98C>G	p.Ser33Trp	missense_variant	MODERATE	10	0	0.1	13	5	0.455	1.33973
Aplan_7298_NR_1000nM_C2_vs_Aplan_7298_NR_Parent	chr6	70917686	70917686	G	C	Tex37	c.7C>G	p.Arg3Gly	missense_variant	MODERATE	59	0	0.02	33	9	0.277	4.35268
Aplan_7298_NR_1000nM_C2_vs_Aplan_7298_NR_Parent	chr6	71373888	71373888	C	G	Cd8a	c.336C>G	p.Tyr112*	stop_gained	HIGH	47	0	0.023	34	8	0.265	3.24835
Aplan_7298_NR_1000nM_C2_vs_Aplan_7298_NR_Parent	chr6	71399165	71399165	G	A	Rmnd5a	c.650C>T	p.Ala217Val	missense_variant	MODERATE	68	0	0.017	69	14	0.237	4.23145
Aplan_7298_NR_1000nM_C2_vs_Aplan_7298_NR_Parent	chr6	72234947	72234947	G	C	Atoh8	c.218C>G	p.Pro73Arg	missense_variant	MODERATE	79	0	0.014	40	10	0.264	5.0987
Aplan_7298_NR_1000nM_C2_vs_Aplan_7298_NR_Parent	chr6	77244807	77244807	G	T	Lrrtm1	c.1246G>T	p.Gly416Cys	missense_variant	MODERATE	66	0	0.015	49	13	0.245	5.26964
Aplan_7298_NR_1000nM_C2_vs_Aplan_7298_NR_Parent	chr6	83265700	83265700	C	G	Slc4a5	c.705C>G	p.Ser235Ser	synonymous_variant	LOW	46	0	0.025	45	12	0.275	4.04021
Aplan_7298_NR_1000nM_C2_vs_Aplan_7298_NR_Parent	chr6	85444972	85444972	C	G	Smyd5	c.1087C>G	p.Arg363Gly	missense_variant	MODERATE	59	0	0.02	48	17	0.357	6.73785
Aplan_7298_NR_1000nM_C2_vs_Aplan_7298_NR_Parent	chr6	85484253	85484253	G	C	Fbxo41	c.472C>G	p.Arg158Gly	missense_variant	MODERATE	37	0	0.029	22	6	0.306	2.78095
Aplan_7298_NR_1000nM_C2_vs_Aplan_7298_NR_Parent	chr6	86628717	86628717	G	C	Asprv1	c.544G>C	p.Glu182Gln	missense_variant	MODERATE	72	0	0.015	35	7	0.222	3.58858
Aplan_7298_NR_1000nM_C2_vs_Aplan_7298_NR_Parent	chr6	91159199	91159199	C	T	Hdac11	c.190C>T	p.Arg64Trp	missense_variant	MODERATE	80	0	0.014	41	9	0.242	4.50846
Aplan_7298_NR_1000nM_C2_vs_Aplan_7298_NR_Parent	chr6	94611624	94611624	G	C	Lrig1	c.1543C>G	p.Arg515Gly	missense_variant	MODERATE	22	0	0.045	19	7	0.35	2.64951
Aplan_7298_NR_1000nM_C2_vs_Aplan_7298_NR_Parent	chr6	100783278	100783278	G	C	Gxylt2	c.773G>C	p.Arg258Pro	missense_variant	MODERATE	53	0	0.022	37	8	0.249	3.30271
Aplan_7298_NR_1000nM_C2_vs_Aplan_7298_NR_Parent	chr6	112328859	112328859	G	C	Lmcd1	c.920G>C	p.Arg307Pro	missense_variant	MODERATE	32	0	0.037	21	9	0.403	4.17832
Aplan_7298_NR_1000nM_C2_vs_Aplan_7298_NR_Parent	chr6	113176569	113176569	G	C	Lhfpl4	c.520C>G	p.Arg174Gly	missense_variant	MODERATE	83	1	0.014	58	19	0.304	7.07837
Aplan_7298_NR_1000nM_C2_vs_Aplan_7298_NR_Parent	chr6	113494780	113494780	G	C	Prrt3	c.2430C>G	p.Ala810Ala	synonymous_variant	LOW	36	0	0.028	32	6	0.218	2.08201
Aplan_7298_NR_1000nM_C2_vs_Aplan_7298_NR_Parent	chr6	113494834	113494834	G	C	Prrt3	c.2376C>G	p.Ser792Arg	missense_variant	MODERATE	46	0	0.022	29	8	0.275	3.59447
Aplan_7298_NR_1000nM_C2_vs_Aplan_7298_NR_Parent	chr6	113497054	113497054	G	C	Prrt3	c.1022C>G	p.Ser341Cys	missense_variant	MODERATE	66	0	0.018	28	8	0.31	4.55406
Aplan_7298_NR_1000nM_C2_vs_Aplan_7298_NR_Parent	chr6	113736437	113736437	C	G	Sec13	c.99G>C	p.Ser33Ser	synonymous_variant	LOW	58	0	0.02	29	9	0.308	4.7094
Aplan_7298_NR_1000nM_C2_vs_Aplan_7298_NR_Parent	chr6	115626386	115626386	G	C	Raf1	c.1013C>G	p.Ser338Trp	missense_variant	MODERATE	71	0	0.016	54	22	0.407	5.91012
Aplan_7298_NR_1000nM_C2_vs_Aplan_7298_NR_Parent	chr6	116582053	116582053	C	G	Olfr215	c.892G>C	p.Ala298Pro	missense_variant	MODERATE	76	0	0.014	58	17	0.287	6.85397
Aplan_7298_NR_1000nM_C2_vs_Aplan_7298_NR_Parent	chr6	119271291	119271291	G	C	Cacna2d4	c.1165G>C	p.Glu389Gln	missense_variant	MODERATE	79	0	0.014	58	18	0.321	7.49435
Aplan_7298_NR_1000nM_C2_vs_Aplan_7298_NR_Parent	chr6	119630698	119630698	G	C	Erc1	c.2842C>G	p.Leu948Val	missense_variant	MODERATE	73	0	0.016	54	13	0.245	5.23462
Aplan_7298_NR_1000nM_C2_vs_Aplan_7298_NR_Parent	chr6	120792966	120792966	G	C	Slc25a18	c.802G>C	p.Gly268Arg	missense_variant	MODERATE	53	0	0.023	29	7	0.233	3.38664
Aplan_7298_NR_1000nM_C2_vs_Aplan_7298_NR_Parent	chr6	120958563	120958563	C	G	Mical3	c.5001G>C	p.Pro1667Pro	synonymous_variant	LOW	130	0	0.009019	78	19	0.261	7.13812
Aplan_7298_NR_1000nM_C2_vs_Aplan_7298_NR_Parent	chr6	121268573	121268573	G	C	Usp18	c.907G>C	p.Val303Leu	missense_variant	MODERATE	75	0	0.015	45	14	0.327	6.60331
Aplan_7298_NR_1000nM_C2_vs_Aplan_7298_NR_Parent	chr6	122562444	122562444	C	G	Aicda	c.568C>G	p.Arg190Gly	missense_variant	MODERATE	136	0	0.008878	99	23	0.244	6.44557
Aplan_7298_NR_1000nM_C2_vs_Aplan_7298_NR_Parent	chr6	124999290	124999290	G	C	Pianp	c.61G>C	p.Val21Leu	missense_variant	MODERATE	170	0	0.006932	79	20	0.281	6.36241
Aplan_7298_NR_1000nM_C2_vs_Aplan_7298_NR_Parent	chr6	125461234	125461234	C	G	Cd9	c.607G>C	p.Val203Leu	missense_variant	MODERATE	57	0	0.021	23	7	0.32	4.11253
Aplan_7298_NR_1000nM_C2_vs_Aplan_7298_NR_Parent	chr6	125642306	125642306	G	C	Vwf	c.3946G>C	p.Val1316Leu	missense_variant	MODERATE	84	0	0.013	59	21	0.357	6.17458
Aplan_7298_NR_1000nM_C2_vs_Aplan_7298_NR_Parent	chr6	134610752	134610752	C	G	Mansc1	c.461G>C	p.Arg154Pro	missense_variant	MODERATE	53	0	0.021	33	12	0.375	5.63441
Aplan_7298_NR_1000nM_C2_vs_Aplan_7298_NR_Parent	chr6	137252713	137252713	G	C	Ptpro	c.28G>C	p.Gly10Arg	missense_variant	MODERATE	102	0	0.011	61	16	0.296	7.43694
Aplan_7298_NR_1000nM_C2_vs_Aplan_7298_NR_Parent	chr6	142345796	142345796	T	G	Pyroxd1	c.64T>G	p.Cys22Gly	missense_variant	MODERATE	109	0	0.011	58	19	0.313	6.60065
Aplan_7298_NR_1000nM_C2_vs_Aplan_7298_NR_Parent	chr6	146566549	146566549	C	G	Asun	c.447G>C	p.Glu149Asp	missense_variant	MODERATE	123	0	0.01	83	19	0.22	6.53132
Aplan_7298_NR_1000nM_C2_vs_Aplan_7298_NR_Parent	chr6	149036439	149036439	C	G	Dennd5b	c.1959G>C	p.Gly653Gly	synonymous_variant	LOW	112	0	0.011	115	27	0.25	6.20393
Aplan_7298_NR_1000nM_C2_vs_Aplan_7298_NR_Parent	chr7	4145329	4145329	C	T	Leng8	c.2099C>T	p.Ala700Val	missense_variant	MODERATE	74	0	0.015	34	8	0.264	4.28755
Aplan_7298_NR_1000nM_C2_vs_Aplan_7298_NR_Parent	chr7	4151625	4151625	C	G	Cdc42ep5	c.163G>C	p.Gly55Arg	missense_variant	MODERATE	51	0	0.02	35	17	0.472	6.27442
Aplan_7298_NR_1000nM_C2_vs_Aplan_7298_NR_Parent	chr7	4151682	4151682	C	G	Cdc42ep5	c.106G>C	p.Val36Leu	missense_variant	MODERATE	73	0	0.015	45	15	0.311	7.02075
Aplan_7298_NR_1000nM_C2_vs_Aplan_7298_NR_Parent	chr7	6440330	6440330	C	T	Olfr1344	c.429C>T	p.Cys143Cys	synonymous_variant	LOW	78	0	0.013	38	9	0.238	4.66994
Aplan_7298_NR_1000nM_C2_vs_Aplan_7298_NR_Parent	chr7	6678224	6678224	G	A	Zim1	c.439C>T	p.Arg147Trp	missense_variant	MODERATE	117	0	0.009343	113	24	0.208	5.97734
Aplan_7298_NR_1000nM_C2_vs_Aplan_7298_NR_Parent	chr7	10037559	10037559	C	G	Vmn2r50	c.2262G>C	p.Leu754Phe	missense_variant	MODERATE	404	0	0.002752	336	79	0.231	5.69453
Aplan_7298_NR_1000nM_C2_vs_Aplan_7298_NR_Parent	chr7	10047986	10047986	T	G	Vmn2r50	c.879A>C	p.Leu293Phe	missense_variant	MODERATE	403	0	0.002786	302	67	0.225	6.07222
Aplan_7298_NR_1000nM_C2_vs_Aplan_7298_NR_Parent	chr7	12928413	12928413	G	C	Rnf225	c.518G>C	p.Arg173Pro	missense_variant	MODERATE	21	0	0.043	15	5	0.375	2.09878
Aplan_7298_NR_1000nM_C2_vs_Aplan_7298_NR_Parent	chr7	13043428	13043428	G	C	Mzf1	c.2048C>G	p.Ala683Gly	missense_variant	MODERATE	16	0	0.063	14	5	0.434	1.85237
Aplan_7298_NR_1000nM_C2_vs_Aplan_7298_NR_Parent	chr7	13044478	13044478	G	C	Mzf1	c.998C>G	p.Ala333Gly	missense_variant	MODERATE	44	0	0.023	29	6	0.214	2.55433
Aplan_7298_NR_1000nM_C2_vs_Aplan_7298_NR_Parent	chr7	13344457	13344457	G	C	Pla2g4c	c.1153G>C	p.Val385Leu	missense_variant	MODERATE	61	0	0.018	36	15	0.424	7.44392
Aplan_7298_NR_1000nM_C2_vs_Aplan_7298_NR_Parent	chr7	16885211	16885211	C	G	Dact3	c.630C>G	p.Ala210Ala	synonymous_variant	LOW	61	0	0.017	32	10	0.334	5.09774
Aplan_7298_NR_1000nM_C2_vs_Aplan_7298_NR_Parent	chr7	19068157	19068157	C	G	Rsph6a	c.1889+6C>G		splice_region_variant&intron_variant	LOW	66	0	0.017	46	10	0.219	4.1425
Aplan_7298_NR_1000nM_C2_vs_Aplan_7298_NR_Parent	chr7	19696667	19696667	C	T	Apoe	c.649G>A	p.Ala217Thr	missense_variant	MODERATE	78	0	0.013	54	11	0.222	4.55819
Aplan_7298_NR_1000nM_C2_vs_Aplan_7298_NR_Parent	chr7	20811792	20811792	A	G	Vmn1r114	c.395T>C	p.Val132Ala	missense_variant	MODERATE	33	0	0.028	44	12	0.282	3.08869
Aplan_7298_NR_1000nM_C2_vs_Aplan_7298_NR_Parent	chr7	24333668	24333668	G	C	Tescl	c.231C>G	p.Arg77Arg	synonymous_variant	LOW	77	0	0.013	49	25	0.49	5.97288
Aplan_7298_NR_1000nM_C2_vs_Aplan_7298_NR_Parent	chr7	24433314	24433314	C	G	Irgc1	c.77G>C	p.Arg26Pro	missense_variant	MODERATE	23	0	0.043	20	5	0.24	1.793
Aplan_7298_NR_1000nM_C2_vs_Aplan_7298_NR_Parent	chr7	24925845	24925845	C	G	Arhgef1	c.2727C>G	p.Arg909Arg	synonymous_variant	LOW	144	0	0.008349	85	16	0.222	7.30798
Aplan_7298_NR_1000nM_C2_vs_Aplan_7298_NR_Parent	chr7	25096942	25096942	G	C	Pou2f2	c.1031C>G	p.Ala344Gly	missense_variant	MODERATE	142	2	0.009226	78	21	0.278	6.95376
Aplan_7298_NR_1000nM_C2_vs_Aplan_7298_NR_Parent	chr7	27655050	27655050	G	C	Ttc9b	c.560G>C	p.Arg187Pro	missense_variant	MODERATE	40	0	0.026	27	10	0.348	4.46829
Aplan_7298_NR_1000nM_C2_vs_Aplan_7298_NR_Parent	chr7	28107227	28107227	G	C	Fcgbp	c.6619G>C	p.Gly2207Arg	missense_variant	MODERATE	126	0	0.008291	88	22	0.24	6.32658
Aplan_7298_NR_1000nM_C2_vs_Aplan_7298_NR_Parent	chr7	28565018	28565018	C	G	Pak4	c.458G>C	p.Arg153Pro	missense_variant	MODERATE	60	0	0.017	39	9	0.269	3.91214
Aplan_7298_NR_1000nM_C2_vs_Aplan_7298_NR_Parent	chr7	28911558	28911558	G	C	Actn4	c.754C>G	p.Arg252Gly	missense_variant	MODERATE	64	0	0.017	43	16	0.384	7.21353
Aplan_7298_NR_1000nM_C2_vs_Aplan_7298_NR_Parent	chr7	28913383	28913383	G	C	Actn4	c.649C>G	p.Arg217Gly	missense_variant	MODERATE	45	0	0.024	23	6	0.262	3.03514
Aplan_7298_NR_1000nM_C2_vs_Aplan_7298_NR_Parent	chr7	29040593	29040593	G	C	Ryr1	c.11907C>G	p.Thr3969Thr	synonymous_variant	LOW	95	0	0.011	41	11	0.267	6.18782
Aplan_7298_NR_1000nM_C2_vs_Aplan_7298_NR_Parent	chr7	29047475	29047475	C	G	Ryr1	c.11352G>C	p.Gln3784His	missense_variant	MODERATE	16	0	0.061	18	9	0.416	2.94117
Aplan_7298_NR_1000nM_C2_vs_Aplan_7298_NR_Parent	chr7	29348332	29348332	G	A	Sipa1l3	c.4130C>T	p.Ser1377Leu	missense_variant	MODERATE	61	0	0.018	45	12	0.25	4.88379
Aplan_7298_NR_1000nM_C2_vs_Aplan_7298_NR_Parent	chr7	29388138	29388138	C	T	Sipa1l3	c.1661G>A	p.Arg554Gln	missense_variant	MODERATE	80	0	0.015	42	14	0.333	7.2089
Aplan_7298_NR_1000nM_C2_vs_Aplan_7298_NR_Parent	chr7	30133307	30133307	C	G	Zfp382	c.382C>G	p.Pro128Ala	missense_variant	MODERATE	72	0	0.015	34	8	0.272	4.22038
Aplan_7298_NR_1000nM_C2_vs_Aplan_7298_NR_Parent	chr7	30355959	30355959	C	G	Lrfn3	c.1560G>C	p.Thr520Thr	synonymous_variant	LOW	42	0	0.027	22	6	0.303	3.0021
Aplan_7298_NR_1000nM_C2_vs_Aplan_7298_NR_Parent	chr7	30958457	30958457	C	G	Lsr	c.1281G>C	p.Trp427Cys	missense_variant	MODERATE	96	0	0.011	58	14	0.249	6.41424
Aplan_7298_NR_1000nM_C2_vs_Aplan_7298_NR_Parent	chr7	35584788	35584788	C	G	Rgs9bp	c.433G>C	p.Ala145Pro	missense_variant	MODERATE	15	0	0.063	17	6	0.369	1.71715
Aplan_7298_NR_1000nM_C2_vs_Aplan_7298_NR_Parent	chr7	36769987	36769987	C	G	Tshz3	c.1400C>G	p.Ala467Gly	missense_variant	MODERATE	50	0	0.022	33	9	0.297	3.93057
Aplan_7298_NR_1000nM_C2_vs_Aplan_7298_NR_Parent	chr7	36771405	36771405	G	C	Tshz3	c.2818G>C	p.Gly940Arg	missense_variant	MODERATE	91	0	0.013	71	14	0.238	5.36026
Aplan_7298_NR_1000nM_C2_vs_Aplan_7298_NR_Parent	chr7	41865195	41865195	G	C	Vmn2r58	c.349C>G	p.Arg117Gly	missense_variant	MODERATE	108	0	0.009908	104	26	0.242	5.96623
Aplan_7298_NR_1000nM_C2_vs_Aplan_7298_NR_Parent	chr7	44885456	44885456	G	C	Med25	c.571C>G	p.Leu191Val	missense_variant	MODERATE	70	1	0.015	31	10	0.354	4.69753
Aplan_7298_NR_1000nM_C2_vs_Aplan_7298_NR_Parent	chr7	45000537	45000537	G	C	Irf3	c.574G>C	p.Ala192Pro	missense_variant	MODERATE	76	0	0.014	47	15	0.33	6.96985
Aplan_7298_NR_1000nM_C2_vs_Aplan_7298_NR_Parent	chr7	45147997	45147997	C	G	Aldh16a1	c.386G>C	p.Arg129Pro	missense_variant	MODERATE	106	0	0.01	77	18	0.232	7.32897
Aplan_7298_NR_1000nM_C2_vs_Aplan_7298_NR_Parent	chr7	45149745	45149745	G	C	Aldh16a1	c.112C>G	p.Arg38Gly	missense_variant	MODERATE	81	0	0.014	35	9	0.294	5.03331
Aplan_7298_NR_1000nM_C2_vs_Aplan_7298_NR_Parent	chr7	45415975	45415975	G	C	Ntf5	c.530G>C	p.Arg177Pro	missense_variant	MODERATE	63	0	0.017	52	10	0.2	3.67318
Aplan_7298_NR_1000nM_C2_vs_Aplan_7298_NR_Parent	chr7	45636836	45636836	C	G	Rasip1	c.2482C>G	p.Arg828Gly	missense_variant	MODERATE	121	0	0.009287	59	12	0.244	6.17117
Aplan_7298_NR_1000nM_C2_vs_Aplan_7298_NR_Parent	chr7	45700288	45700288	C	G	Car11	c.16C>G	p.Arg6Gly	missense_variant	MODERATE	25	0	0.04	12	5	0.419	2.74066
Aplan_7298_NR_1000nM_C2_vs_Aplan_7298_NR_Parent	chr7	45811554	45811554	C	G	Cyth2	c.409G>C	p.Asp137His	missense_variant	MODERATE	65	0	0.019	48	15	0.3	6.21895
Aplan_7298_NR_1000nM_C2_vs_Aplan_7298_NR_Parent	chr7	49461920	49461920	G	C	Nav2	c.2173G>C	p.Glu725Gln	missense_variant	MODERATE	51	0	0.022	34	8	0.281	3.42334
Aplan_7298_NR_1000nM_C2_vs_Aplan_7298_NR_Parent	chr7	55985480	55985480	G	C	Nipa1	c.384C>G	p.Val128Val	synonymous_variant	LOW	45	0	0.025	29	10	0.32	4.55469
Aplan_7298_NR_1000nM_C2_vs_Aplan_7298_NR_Parent	chr7	65311140	65311140	G	C	Tjp1	c.4063C>G	p.Arg1355Gly	missense_variant	MODERATE	58	0	0.019	57	13	0.241	4.30007
Aplan_7298_NR_1000nM_C2_vs_Aplan_7298_NR_Parent	chr7	66289639	66289639	C	G	Lrrk1	c.2500G>C	p.Gly834Arg	missense_variant	MODERATE	20	0	0.049	22	6	0.299	1.6653
Aplan_7298_NR_1000nM_C2_vs_Aplan_7298_NR_Parent	chr7	68193549	68193549	G	C	Igf1r	c.2407G>C	p.Asp803His	missense_variant	MODERATE	34	0	0.032	25	8	0.375	3.3118
Aplan_7298_NR_1000nM_C2_vs_Aplan_7298_NR_Parent	chr7	79381687	79381687	G	C	Rlbp1	c.292C>G	p.Arg98Gly	missense_variant	MODERATE	82	0	0.015	34	10	0.294	5.79385
Aplan_7298_NR_1000nM_C2_vs_Aplan_7298_NR_Parent	chr7	79842106	79842106	G	C	Anpep	c.146C>G	p.Thr49Arg	missense_variant	MODERATE	62	0	0.017	42	13	0.317	5.68068
Aplan_7298_NR_1000nM_C2_vs_Aplan_7298_NR_Parent	chr7	80359356	80359356	G	C	Man2a2	c.2508C>G	p.Thr836Thr	synonymous_variant	LOW	36	0	0.028	20	8	0.435	4.05217
Aplan_7298_NR_1000nM_C2_vs_Aplan_7298_NR_Parent	chr7	80379847	80379847	G	C	Fes	c.1892C>G	p.Pro631Arg	missense_variant	MODERATE	119	0	0.009381	73	19	0.294	7.0715
Aplan_7298_NR_1000nM_C2_vs_Aplan_7298_NR_Parent	chr7	80723080	80723080	C	A	Iqgap1	c.4510G>T	p.Val1504Leu	missense_variant	MODERATE	39	0	0.027	19	8	0.425	4.40416
Aplan_7298_NR_1000nM_C2_vs_Aplan_7298_NR_Parent	chr7	82777600	82777600	G	A	Efl1	c.3305G>A	p.Arg1102Gln	missense_variant	MODERATE	37	0	0.031	31	9	0.321	3.38818
Aplan_7298_NR_1000nM_C2_vs_Aplan_7298_NR_Parent	chr7	83633170	83633170	G	C	Stard5	c.190G>C	p.Val64Leu	missense_variant	MODERATE	24	0	0.04	16	5	0.312	2.17795
Aplan_7298_NR_1000nM_C2_vs_Aplan_7298_NR_Parent	chr7	86800970	86800970	G	C	Vmn2r77	c.423G>C	p.Thr141Thr	synonymous_variant	LOW	102	0	0.011	81	21	0.256	6.59265
Aplan_7298_NR_1000nM_C2_vs_Aplan_7298_NR_Parent	chr7	97457800	97457800	C	G	Kctd14	c.420C>G	p.Tyr140*	stop_gained	HIGH	61	0	0.018	37	12	0.324	5.64198
Aplan_7298_NR_1000nM_C2_vs_Aplan_7298_NR_Parent	chr7	98194504	98194504	C	G	B3gnt6	c.248G>C	p.Arg83Thr	missense_variant	MODERATE	48	0	0.024	34	7	0.208	2.84923
Aplan_7298_NR_1000nM_C2_vs_Aplan_7298_NR_Parent	chr7	98194526	98194526	C	G	B3gnt6	c.226G>C	p.Gly76Arg	missense_variant	MODERATE	50	0	0.022	35	8	0.202	3.31064
Aplan_7298_NR_1000nM_C2_vs_Aplan_7298_NR_Parent	chr7	99911854	99911854	G	C	Xrra1	c.1301G>C	p.Arg434Pro	missense_variant	MODERATE	79	0	0.014	40	8	0.205	4.0085
Aplan_7298_NR_1000nM_C2_vs_Aplan_7298_NR_Parent	chr7	100654625	100654625	G	C	Plekhb1	c.327C>G	p.Cys109Trp	missense_variant	MODERATE	178	1	0.006748	107	28	0.259	6.18381
Aplan_7298_NR_1000nM_C2_vs_Aplan_7298_NR_Parent	chr7	100878542	100878542	C	G	Arhgef17	c.5267G>C	p.Arg1756Pro	missense_variant	MODERATE	78	0	0.015	31	7	0.241	4.05428
Aplan_7298_NR_1000nM_C2_vs_Aplan_7298_NR_Parent	chr7	101786349	101786349	C	G	Clpb	c.1623C>G	p.Phe541Leu	missense_variant	MODERATE	117	1	0.01	52	11	0.215	5.01896
Aplan_7298_NR_1000nM_C2_vs_Aplan_7298_NR_Parent	chr7	101840710	101840710	C	G	Folr2	c.350G>C	p.Arg117Pro	missense_variant	MODERATE	75	0	0.014	46	13	0.304	5.9842
Aplan_7298_NR_1000nM_C2_vs_Aplan_7298_NR_Parent	chr7	101858620	101858620	G	C	Folr1	c.612C>G	p.Ser204Arg	missense_variant	MODERATE	51	0	0.023	38	10	0.315	4.03168
Aplan_7298_NR_1000nM_C2_vs_Aplan_7298_NR_Parent	chr7	102089993	102089993	C	G	Xntrpc	c.2692C>G	p.Arg898Gly	missense_variant	MODERATE	106	0	0.011	63	16	0.259	7.44336
Aplan_7298_NR_1000nM_C2_vs_Aplan_7298_NR_Parent	chr7	102093624	102093624	G	A	Xntrpc	c.2962G>A	p.Val988Met	missense_variant	MODERATE	62	0	0.018	38	11	0.289	5.07077
Aplan_7298_NR_1000nM_C2_vs_Aplan_7298_NR_Parent	chr7	102710162	102710162	G	C	Olfr558	c.902G>C	p.Arg301Pro	missense_variant	MODERATE	131	0	0.008407	87	26	0.285	5.8336
Aplan_7298_NR_1000nM_C2_vs_Aplan_7298_NR_Parent	chr7	105384488	105384488	C	G	Fam160a2	c.1562G>C	p.Arg521Pro	missense_variant	MODERATE	75	0	0.016	39	7	0.217	3.42735
Aplan_7298_NR_1000nM_C2_vs_Aplan_7298_NR_Parent	chr7	107001786	107001786	G	C	Olfr2	c.73C>G	p.Arg25Gly	missense_variant	MODERATE	73	0	0.015	47	14	0.306	6.29212
Aplan_7298_NR_1000nM_C2_vs_Aplan_7298_NR_Parent	chr7	107181842	107181842	C	G	Nlrp14	c.245C>G	p.Thr82Arg	missense_variant	MODERATE	63	0	0.017	62	19	0.323	6.1128
Aplan_7298_NR_1000nM_C2_vs_Aplan_7298_NR_Parent	chr7	107504316	107504316	C	T	Syt9	c.1320C>T	p.Ala440Ala	synonymous_variant	LOW	40	0	0.026	34	6	0.212	2.13907
Aplan_7298_NR_1000nM_C2_vs_Aplan_7298_NR_Parent	chr7	110329842	110329842	G	C	Sbf2	c.4431C>G	p.Ser1477Arg	missense_variant	MODERATE	46	0	0.026	27	6	0.27	2.75973
Aplan_7298_NR_1000nM_C2_vs_Aplan_7298_NR_Parent	chr7	110628938	110628938	C	G	Adm	c.325C>G	p.Arg109Gly	missense_variant	MODERATE	56	0	0.018	31	8	0.296	3.86966
Aplan_7298_NR_1000nM_C2_vs_Aplan_7298_NR_Parent	chr7	114264921	114264921	G	C	Psma1	c.771C>G	p.Ala257Ala	synonymous_variant	LOW	68	0	0.017	50	12	0.26	4.84682
Aplan_7298_NR_1000nM_C2_vs_Aplan_7298_NR_Parent	chr7	118672276	118672276	G	C	Tmc5	c.2811G>C	p.Val937Val	synonymous_variant	LOW	34	0	0.031	23	5	0.227	2.09494
Aplan_7298_NR_1000nM_C2_vs_Aplan_7298_NR_Parent	chr7	127001545	127001545	C	G	Mvp	c.283G>C	p.Ala95Pro	missense_variant	MODERATE	80	0	0.015	41	11	0.283	5.60649
Aplan_7298_NR_1000nM_C2_vs_Aplan_7298_NR_Parent	chr7	127203268	127203268	C	G	Tbc1d10b	c.1133G>C	p.Arg378Pro	missense_variant	MODERATE	102	0	0.011	70	21	0.323	6.14865
Aplan_7298_NR_1000nM_C2_vs_Aplan_7298_NR_Parent	chr7	127236739	127236739	C	G	Zfp553	c.1465C>G	p.Arg489Gly	missense_variant	MODERATE	52	0	0.02	30	9	0.335	4.31139
Aplan_7298_NR_1000nM_C2_vs_Aplan_7298_NR_Parent	chr7	127343751	127343751	C	G	Zfp768	c.1213G>C	p.Glu405Gln	missense_variant	MODERATE	40	0	0.026	24	6	0.251	2.74588
Aplan_7298_NR_1000nM_C2_vs_Aplan_7298_NR_Parent	chr7	127344059	127344059	G	C	Zfp768	c.905C>G	p.Ser302Trp	missense_variant	MODERATE	103	0	0.011	64	16	0.276	7.23176
Aplan_7298_NR_1000nM_C2_vs_Aplan_7298_NR_Parent	chr7	127374426	127374426	G	C	Zfp747	c.571C>G	p.Arg191Gly	missense_variant	MODERATE	301	0	0.003332	238	60	0.255	5.7862
Aplan_7298_NR_1000nM_C2_vs_Aplan_7298_NR_Parent	chr7	127540804	127540804	G	T	Srcap	c.4074G>T	p.Thr1358Thr	synonymous_variant	LOW	163	0	0.007232	73	21	0.295	5.99057
Aplan_7298_NR_1000nM_C2_vs_Aplan_7298_NR_Parent	chr7	127582552	127582552	C	G	Phkg2	c.835C>G	p.Arg279Gly	missense_variant	MODERATE	97	0	0.011	75	15	0.208	5.78559
Aplan_7298_NR_1000nM_C2_vs_Aplan_7298_NR_Parent	chr7	127589563	127589563	C	G	Rnf40	c.184C>G	p.Arg62Gly	missense_variant	MODERATE	50	0	0.023	27	9	0.385	4.53682
Aplan_7298_NR_1000nM_C2_vs_Aplan_7298_NR_Parent	chr7	127783988	127783988	C	G	Setd1a	c.655C>G	p.Arg219Gly	missense_variant	MODERATE	68	0	0.016	28	7	0.267	4.00288
Aplan_7298_NR_1000nM_C2_vs_Aplan_7298_NR_Parent	chr7	127802279	127802279	C	G	Hsd3b7	c.575C>G	p.Thr192Arg	missense_variant	MODERATE	69	0	0.016	46	13	0.311	5.68133
Aplan_7298_NR_1000nM_C2_vs_Aplan_7298_NR_Parent	chr7	127802356	127802356	C	G	Hsd3b7	c.652C>G	p.Arg218Gly	missense_variant	MODERATE	70	0	0.016	38	13	0.379	6.58012
Aplan_7298_NR_1000nM_C2_vs_Aplan_7298_NR_Parent	chr7	127811187	127811187	C	G	Stx1b	c.330G>C	p.Ala110Ala	synonymous_variant	LOW	91	0	0.013	43	9	0.222	4.71374
Aplan_7298_NR_1000nM_C2_vs_Aplan_7298_NR_Parent	chr7	127867308	127867308	G	C	Zfp668	c.703C>G	p.Arg235Gly	missense_variant	MODERATE	62	0	0.017	29	10	0.321	5.50632
Aplan_7298_NR_1000nM_C2_vs_Aplan_7298_NR_Parent	chr7	128010257	128010257	G	C	Trim72	c.1230G>C	p.Pro410Pro	synonymous_variant	LOW	53	0	0.019	34	11	0.295	4.99073
Aplan_7298_NR_1000nM_C2_vs_Aplan_7298_NR_Parent	chr7	128270316	128270316	G	C	Slc5a2	c.1052G>C	p.Arg351Pro	missense_variant	MODERATE	79	0	0.015	35	10	0.303	5.56906
Aplan_7298_NR_1000nM_C2_vs_Aplan_7298_NR_Parent	chr7	128667774	128667774	C	G	Inpp5f	c.847C>G	p.Arg283Gly	missense_variant	MODERATE	30	0	0.032	28	8	0.322	2.79008
Aplan_7298_NR_1000nM_C2_vs_Aplan_7298_NR_Parent	chr7	128676764	128676764	C	G	Inpp5f	c.1277C>G	p.Thr426Arg	missense_variant	MODERATE	72	0	0.018	79	26	0.339	6.4097
Aplan_7298_NR_1000nM_C2_vs_Aplan_7298_NR_Parent	chr7	131090454	131090454	C	T	Dmbt1	c.2916C>T	p.Ser972Ser	synonymous_variant	LOW	109	0	0.009653	103	30	0.301	6.24142
Aplan_7298_NR_1000nM_C2_vs_Aplan_7298_NR_Parent	chr7	132715734	132715734	G	C	Fam53b	c.1178C>G	p.Pro393Arg	missense_variant	MODERATE	61	0	0.016	31	6	0.216	2.98609
Aplan_7298_NR_1000nM_C2_vs_Aplan_7298_NR_Parent	chr7	133890209	133890209	C	G	Adam12	c.2622G>C	p.Gly874Gly	synonymous_variant	LOW	18	0	0.053	19	5	0.293	1.33412
Aplan_7298_NR_1000nM_C2_vs_Aplan_7298_NR_Parent	chr7	134851545	134851545	G	C	Dock1	c.2502G>C	p.Thr834Thr	synonymous_variant	LOW	95	0	0.012	84	23	0.279	6.5665
Aplan_7298_NR_1000nM_C2_vs_Aplan_7298_NR_Parent	chr7	140323193	140323193	C	G	Olfr525	c.493C>G	p.Arg165Gly	missense_variant	MODERATE	117	0	0.008691	71	15	0.215	6.78553
Aplan_7298_NR_1000nM_C2_vs_Aplan_7298_NR_Parent	chr7	140638541	140638541	C	G	Olfr61	c.839C>G	p.Ser280Trp	missense_variant	MODERATE	393	0	0.002901	292	69	0.248	5.93249
Aplan_7298_NR_1000nM_C2_vs_Aplan_7298_NR_Parent	chr7	141070503	141070503	G	C	B4galnt4	c.2282G>C	p.Arg761Pro	missense_variant	MODERATE	45	0	0.024	34	7	0.206	2.73146
Aplan_7298_NR_1000nM_C2_vs_Aplan_7298_NR_Parent	chr7	141092382	141092382	G	C	Sigirr	c.724C>G	p.Arg242Gly	missense_variant&splice_region_variant	MODERATE	65	0	0.017	36	11	0.304	5.4225
Aplan_7298_NR_1000nM_C2_vs_Aplan_7298_NR_Parent	chr7	141092605	141092605	G	C	Sigirr	c.603C>G	p.Arg201Arg	synonymous_variant	LOW	53	0	0.021	37	15	0.361	6.68935
Aplan_7298_NR_1000nM_C2_vs_Aplan_7298_NR_Parent	chr7	141464935	141464935	G	C	Cracr2b	c.585-4G>C		splice_region_variant&intron_variant	LOW	76	0	0.015	47	10	0.228	4.46198
Aplan_7298_NR_1000nM_C2_vs_Aplan_7298_NR_Parent	chr7	141491635	141491635	G	C	Tspan4	c.394G>C	p.Val132Leu	missense_variant	MODERATE	92	0	0.013	51	11	0.209	5.25842
Aplan_7298_NR_1000nM_C2_vs_Aplan_7298_NR_Parent	chr7	142370979	142370979	G	C	Ifitm10	c.122C>G	p.Thr41Arg	missense_variant	MODERATE	79	1	0.017	56	14	0.26	4.8114
Aplan_7298_NR_1000nM_C2_vs_Aplan_7298_NR_Parent	chr8	10021424	10021424	G	C	Tnfsf13b	c.548G>C	p.Arg183Pro	missense_variant	MODERATE	35	0	0.036	28	6	0.224	2.25612
Aplan_7298_NR_1000nM_C2_vs_Aplan_7298_NR_Parent	chr8	11514178	11514178	G	C	Cars2	c.1595C>G	p.Ala532Gly	missense_variant	MODERATE	66	0	0.017	50	18	0.365	7.49333
Aplan_7298_NR_1000nM_C2_vs_Aplan_7298_NR_Parent	chr8	14896838	14896838	G	C	Cln8	c.851G>C	p.Arg284Pro	missense_variant	MODERATE	31	0	0.032	27	6	0.248	2.13588
Aplan_7298_NR_1000nM_C2_vs_Aplan_7298_NR_Parent	chr8	22560973	22560973	G	C	Slc20a2	c.1021G>C	p.Gly341Arg	missense_variant	MODERATE	63	0	0.018	37	7	0.222	3.19168
Aplan_7298_NR_1000nM_C2_vs_Aplan_7298_NR_Parent	chr8	23087030	23087030	G	C	Ank1	c.637G>C	p.Ala213Pro	missense_variant	MODERATE	32	0	0.036	25	8	0.34	3.18406
Aplan_7298_NR_1000nM_C2_vs_Aplan_7298_NR_Parent	chr8	35826075	35826075	C	G	Cldn23	c.258G>C	p.Thr86Thr	synonymous_variant	LOW	73	0	0.014	29	12	0.379	7.41552
Aplan_7298_NR_1000nM_C2_vs_Aplan_7298_NR_Parent	chr8	40510116	40510116	C	G	Cnot7	c.16G>C	p.Val6Leu	missense_variant	MODERATE	77	0	0.014	83	22	0.279	6.16882
Aplan_7298_NR_1000nM_C2_vs_Aplan_7298_NR_Parent	chr8	43674418	43674418	C	G	Gm5347	c.1544G>C	p.Arg515Pro	missense_variant	MODERATE	404	0	0.002762	347	87	0.257	5.99536
Aplan_7298_NR_1000nM_C2_vs_Aplan_7298_NR_Parent	chr8	45036229	45036229	C	T	Fat1	c.10467C>T	p.Asn3489Asn	synonymous_variant	LOW	51	0	0.021	47	15	0.326	5.38577
Aplan_7298_NR_1000nM_C2_vs_Aplan_7298_NR_Parent	chr8	47193475	47193475	G	C	Stox2	c.949C>G	p.Arg317Gly	missense_variant	MODERATE	56	0	0.018	34	11	0.355	5.16263
Aplan_7298_NR_1000nM_C2_vs_Aplan_7298_NR_Parent	chr8	53514287	53514287	C	G	Aga	c.332C>G	p.Ala111Gly	missense_variant	MODERATE	42	0	0.03	26	5	0.217	2.19995
Aplan_7298_NR_1000nM_C2_vs_Aplan_7298_NR_Parent	chr8	54077907	54077907	C	T	Vegfc	c.129C>T	p.Pro43Pro	synonymous_variant	LOW	20	0	0.048	19	5	0.316	1.69473
Aplan_7298_NR_1000nM_C2_vs_Aplan_7298_NR_Parent	chr8	54662865	54662865	G	C	Wdr17	c.1902C>G	p.His634Gln	missense_variant	MODERATE	53	0	0.019	52	9	0.2	2.91211
Aplan_7298_NR_1000nM_C2_vs_Aplan_7298_NR_Parent	chr8	69870137	69870137	C	G	Pbx4	c.892C>G	p.Arg298Gly	missense_variant	MODERATE	43	0	0.025	34	11	0.292	4.36837
Aplan_7298_NR_1000nM_C2_vs_Aplan_7298_NR_Parent	chr8	69882014	69882014	G	C	Cilp2	c.2333C>G	p.Thr778Arg	missense_variant	MODERATE	12	0	0.091	9	5	0.5	2.20817
Aplan_7298_NR_1000nM_C2_vs_Aplan_7298_NR_Parent	chr8	69883082	69883082	G	C	Cilp2	c.1265C>G	p.Pro422Arg	missense_variant	MODERATE	71	0	0.015	33	10	0.314	5.45023
Aplan_7298_NR_1000nM_C2_vs_Aplan_7298_NR_Parent	chr8	70291579	70291579	C	G	Homer3	c.864C>G	p.Arg288Arg	synonymous_variant	LOW	54	0	0.02	28	8	0.323	4.05946
Aplan_7298_NR_1000nM_C2_vs_Aplan_7298_NR_Parent	chr8	70330822	70330822	G	C	Gdf1	c.419G>C	p.Arg140Pro	missense_variant	MODERATE	32	0	0.033	22	8	0.318	3.51239
Aplan_7298_NR_1000nM_C2_vs_Aplan_7298_NR_Parent	chr8	70332731	70332731	G	C	Upf1	c.3267C>G	p.Leu1089Leu	synonymous_variant	LOW	47	0	0.022	37	10	0.257	3.89908
Aplan_7298_NR_1000nM_C2_vs_Aplan_7298_NR_Parent	chr8	70335292	70335292	G	C	Upf1	c.2416C>G	p.Arg806Gly	missense_variant	MODERATE	47	0	0.024	40	11	0.279	4.08329
Aplan_7298_NR_1000nM_C2_vs_Aplan_7298_NR_Parent	chr8	70452076	70452076	C	G	Klhl26	c.1183G>C	p.Val395Leu	missense_variant	MODERATE	27	0	0.037	16	5	0.333	2.34316
Aplan_7298_NR_1000nM_C2_vs_Aplan_7298_NR_Parent	chr8	70501203	70501203	G	C	Crlf1	c.958G>C	p.Gly320Arg	missense_variant	MODERATE	58	0	0.02	25	5	0.207	2.73757
Aplan_7298_NR_1000nM_C2_vs_Aplan_7298_NR_Parent	chr8	70749347	70749347	C	G	Pde4c	c.1736C>G	p.Ser579Trp	missense_variant	MODERATE	50	0	0.023	31	9	0.276	4.11196
Aplan_7298_NR_1000nM_C2_vs_Aplan_7298_NR_Parent	chr8	70817003	70817003	G	C	Il12rb1	c.1510G>C	p.Val504Leu	missense_variant	MODERATE	53	0	0.019	34	12	0.384	5.50981
Aplan_7298_NR_1000nM_C2_vs_Aplan_7298_NR_Parent	chr8	70819358	70819358	C	G	Il12rb1	c.1715C>G	p.Ala572Gly	missense_variant	MODERATE	121	0	0.009925	67	13	0.206	6.1811
Aplan_7298_NR_1000nM_C2_vs_Aplan_7298_NR_Parent	chr8	71623107	71623107	G	C	Colgalt1	c.1397G>C	p.Arg466Pro	missense_variant	MODERATE	76	0	0.014	40	9	0.244	4.4453
Aplan_7298_NR_1000nM_C2_vs_Aplan_7298_NR_Parent	chr8	71692999	71692999	C	G	B3gnt3	c.724G>C	p.Val242Leu	missense_variant	MODERATE	90	0	0.012	49	12	0.234	5.85866
Aplan_7298_NR_1000nM_C2_vs_Aplan_7298_NR_Parent	chr8	72462267	72462267	C	G	Cherp	c.2282G>C	p.Arg761Pro	missense_variant	MODERATE	87	0	0.012	42	14	0.333	7.56707
Aplan_7298_NR_1000nM_C2_vs_Aplan_7298_NR_Parent	chr8	72579645	72579645	C	G	Tmem38a	c.207C>G	p.Ala69Ala	synonymous_variant	LOW	58	1	0.022	38	11	0.297	3.93531
Aplan_7298_NR_1000nM_C2_vs_Aplan_7298_NR_Parent	chr8	78435101	78435101	G	C	Pou4f2	c.872C>G	p.Pro291Arg	missense_variant	MODERATE	54	0	0.021	48	9	0.205	3.13535
Aplan_7298_NR_1000nM_C2_vs_Aplan_7298_NR_Parent	chr8	78813060	78813060	G	C	Lsm6	c.10C>G	p.Arg4Gly	missense_variant	MODERATE	109	0	0.011	90	18	0.218	6.65027
Aplan_7298_NR_1000nM_C2_vs_Aplan_7298_NR_Parent	chr8	79274104	79274104	C	G	Mmaa	c.724G>C	p.Gly242Arg	missense_variant&splice_region_variant	MODERATE	91	0	0.013	70	24	0.354	6.40265
Aplan_7298_NR_1000nM_C2_vs_Aplan_7298_NR_Parent	chr8	83319416	83319416	G	C	Elmod2	c.531C>G	p.Leu177Leu	splice_region_variant&synonymous_variant	LOW	79	0	0.015	64	11	0.211	4.06492
Aplan_7298_NR_1000nM_C2_vs_Aplan_7298_NR_Parent	chr8	84130868	84130868	C	G	Podnl1	c.1105C>G	p.Arg369Gly	missense_variant	MODERATE	31	0	0.033	22	5	0.251	2.03732
Aplan_7298_NR_1000nM_C2_vs_Aplan_7298_NR_Parent	chr8	84131055	84131055	G	C	Podnl1	c.1292G>C	p.Arg431Pro	missense_variant	MODERATE	32	0	0.033	35	12	0.334	3.75253
Aplan_7298_NR_1000nM_C2_vs_Aplan_7298_NR_Parent	chr8	84548574	84548574	G	C	Cacna1a	c.1630G>C	p.Gly544Arg	missense_variant	MODERATE	68	0	0.017	52	9	0.204	3.45365
Aplan_7298_NR_1000nM_C2_vs_Aplan_7298_NR_Parent	chr8	84834226	84834226	C	G	Gadd45gip1	c.469C>G	p.Gln157Glu	missense_variant	MODERATE	33	0	0.035	25	8	0.345	3.24852
Aplan_7298_NR_1000nM_C2_vs_Aplan_7298_NR_Parent	chr8	92360247	92360247	C	G	Irx5	c.806C>G	p.Ala269Gly	missense_variant	MODERATE	16	0	0.059	12	5	0.385	2.09374
Aplan_7298_NR_1000nM_C2_vs_Aplan_7298_NR_Parent	chr8	92879403	92879403	C	A	Lpcat2	c.801C>A	p.Leu267Leu	synonymous_variant	LOW	37	0	0.03	27	11	0.333	4.75613
Aplan_7298_NR_1000nM_C2_vs_Aplan_7298_NR_Parent	chr8	94346397	94346397	G	A	Slc12a3	c.2147G>A	p.Arg716His	missense_variant	MODERATE	58	0	0.021	33	6	0.205	2.77947
Aplan_7298_NR_1000nM_C2_vs_Aplan_7298_NR_Parent	chr8	94521048	94521048	C	G	Nlrc5	c.4862C>G	p.Thr1621Ser	missense_variant	MODERATE	501	0	0.002323	339	84	0.245	5.75552
Aplan_7298_NR_1000nM_C2_vs_Aplan_7298_NR_Parent	chr8	94913334	94913334	G	A	Ccdc102a	c.331C>T	p.Arg111Cys	missense_variant	MODERATE	21	0	0.053	9	5	0.6	3.05346
Aplan_7298_NR_1000nM_C2_vs_Aplan_7298_NR_Parent	chr8	95034980	95034980	G	C	Adgrg3	c.370G>C	p.Glu124Gln	missense_variant	MODERATE	54	0	0.021	22	5	0.236	2.84606
Aplan_7298_NR_1000nM_C2_vs_Aplan_7298_NR_Parent	chr8	95076255	95076255	C	G	Drc7	c.2208C>G	p.Arg736Arg	synonymous_variant	LOW	42	0	0.025	20	8	0.389	4.42879
Aplan_7298_NR_1000nM_C2_vs_Aplan_7298_NR_Parent	chr8	95328122	95328122	C	G	Zfp319	c.1452G>C	p.Pro484Pro	synonymous_variant	LOW	38	0	0.026	27	5	0.221	2.00994
Aplan_7298_NR_1000nM_C2_vs_Aplan_7298_NR_Parent	chr8	95709799	95709799	G	C	Ndrg4	c.654G>C	p.Thr218Thr	synonymous_variant	LOW	116	0	0.009777	59	14	0.26	7.10645
Aplan_7298_NR_1000nM_C2_vs_Aplan_7298_NR_Parent	chr8	104293733	104293733	C	G	Cmtm1	c.789G>C	p.Ser263Ser	synonymous_variant	LOW	93	0	0.012	62	15	0.224	6.46592
Aplan_7298_NR_1000nM_C2_vs_Aplan_7298_NR_Parent	chr8	105275550	105275550	G	C	Hsf4	c.1371G>C	p.Ala457Ala	synonymous_variant	LOW	102	0	0.011	47	10	0.25	5.32389
Aplan_7298_NR_1000nM_C2_vs_Aplan_7298_NR_Parent	chr8	105567125	105567125	C	G	Agrp	c.208G>C	p.Ala70Pro	missense_variant	MODERATE	120	0	0.009436	48	9	0.215	5.14879
Aplan_7298_NR_1000nM_C2_vs_Aplan_7298_NR_Parent	chr8	105704172	105704172	G	C	Enkd1	c.821C>G	p.Pro274Arg	missense_variant	MODERATE	105	0	0.011	71	16	0.241	6.79701
Aplan_7298_NR_1000nM_C2_vs_Aplan_7298_NR_Parent	chr8	105945654	105945654	G	C	Slc12a4	c.2520C>G	p.His840Gln	missense_variant	MODERATE	68	0	0.017	40	12	0.353	5.69822
Aplan_7298_NR_1000nM_C2_vs_Aplan_7298_NR_Parent	chr8	105950204	105950204	G	C	Slc12a4	c.1453C>G	p.Arg485Gly	missense_variant	MODERATE	57	0	0.02	16	5	0.293	3.5364
Aplan_7298_NR_1000nM_C2_vs_Aplan_7298_NR_Parent	chr8	105974766	105974766	C	G	Dpep3	c.1150G>C	p.Gly384Arg	missense_variant	MODERATE	67	0	0.018	35	9	0.26	4.51106
Aplan_7298_NR_1000nM_C2_vs_Aplan_7298_NR_Parent	chr8	105977937	105977937	G	C	Dpep3	c.640C>G	p.Arg214Gly	missense_variant	MODERATE	37	0	0.028	29	6	0.27	2.28165
Aplan_7298_NR_1000nM_C2_vs_Aplan_7298_NR_Parent	chr8	105988711	105988711	G	C	Dpep2	c.1150C>G	p.Arg384Gly	missense_variant	MODERATE	49	0	0.021	30	6	0.2	2.67036
Aplan_7298_NR_1000nM_C2_vs_Aplan_7298_NR_Parent	chr8	105990642	105990642	G	C	Dpep2	c.481C>G	p.Arg161Gly	missense_variant	MODERATE	80	0	0.014	39	9	0.25	4.65937
Aplan_7298_NR_1000nM_C2_vs_Aplan_7298_NR_Parent	chr8	106011397	106011397	G	C	Ddx28	c.28C>G	p.Leu10Val	missense_variant	MODERATE	42	0	0.028	23	7	0.291	3.45328
Aplan_7298_NR_1000nM_C2_vs_Aplan_7298_NR_Parent	chr8	106133632	106133632	C	G	Esrp2	c.895G>C	p.Glu299Gln	missense_variant	MODERATE	222	0	0.005257	133	36	0.264	6.20589
Aplan_7298_NR_1000nM_C2_vs_Aplan_7298_NR_Parent	chr8	106539129	106539129	C	G	Cdh3	c.803C>G	p.Thr268Arg	missense_variant	MODERATE	30	0	0.039	19	9	0.5	4.34713
Aplan_7298_NR_1000nM_C2_vs_Aplan_7298_NR_Parent	chr8	106555328	106555328	G	C	Cdh3	c.2347G>C	p.Ala783Pro	missense_variant	MODERATE	99	0	0.012	68	17	0.232	7.21643
Aplan_7298_NR_1000nM_C2_vs_Aplan_7298_NR_Parent	chr8	106668472	106668472	G	C	Cdh1	c.2512G>C	p.Glu838Gln	missense_variant	MODERATE	83	0	0.014	56	22	0.378	6.88824
Aplan_7298_NR_1000nM_C2_vs_Aplan_7298_NR_Parent	chr8	110881461	110881461	C	G	Cog4	c.2185C>G	p.Arg729Gly	missense_variant	MODERATE	82	0	0.014	67	16	0.241	6.03711
Aplan_7298_NR_1000nM_C2_vs_Aplan_7298_NR_Parent	chr8	111071608	111071608	C	G	Clec18a	c.1210G>C	p.Gly404Arg	missense_variant	MODERATE	44	0	0.024	30	11	0.379	4.88375
Aplan_7298_NR_1000nM_C2_vs_Aplan_7298_NR_Parent	chr8	111629353	111629353	C	G	Ldhd	c.397G>C	p.Val133Leu	missense_variant	MODERATE	38	0	0.025	20	8	0.45	4.18231
Aplan_7298_NR_1000nM_C2_vs_Aplan_7298_NR_Parent	chr8	112005677	112005677	C	G	Kars	c.258G>C	p.Thr86Thr	synonymous_variant	LOW	70	0	0.015	44	9	0.232	3.96109
Aplan_7298_NR_1000nM_C2_vs_Aplan_7298_NR_Parent	chr8	114706355	114706355	C	G	Wwox	c.760C>G	p.Arg254Gly	missense_variant	MODERATE	58	0	0.02	38	10	0.298	4.37769
Aplan_7298_NR_1000nM_C2_vs_Aplan_7298_NR_Parent	chr8	119575445	119575445	G	C	Dnaaf1	c.84G>C	p.Ala28Ala	synonymous_variant	LOW	51	0	0.024	32	6	0.213	2.61964
Aplan_7298_NR_1000nM_C2_vs_Aplan_7298_NR_Parent	chr8	119745522	119745522	C	G	Atp2c2	c.1314C>G	p.Cys438Trp	missense_variant	MODERATE	24	0	0.045	13	6	0.417	3.13187
Aplan_7298_NR_1000nM_C2_vs_Aplan_7298_NR_Parent	chr8	119870413	119870413	G	C	Klhl36	c.852G>C	p.Thr284Thr	synonymous_variant	LOW	41	0	0.026	38	11	0.282	3.87564
Aplan_7298_NR_1000nM_C2_vs_Aplan_7298_NR_Parent	chr8	121798211	121798211	C	G	Klhdc4	c.1070G>C	p.Arg357Pro	missense_variant	MODERATE	34	0	0.032	18	5	0.262	2.48192
Aplan_7298_NR_1000nM_C2_vs_Aplan_7298_NR_Parent	chr8	122865357	122865357	C	A	Cdh15	c.1882C>A	p.Arg628Arg	synonymous_variant	LOW	231	0	0.005284	140	29	0.2	6.07492
Aplan_7298_NR_1000nM_C2_vs_Aplan_7298_NR_Parent	chr8	123090225	123090225	G	C	Spg7	c.1654G>C	p.Val552Leu	missense_variant	MODERATE	53	0	0.024	30	6	0.222	2.80323
Aplan_7298_NR_1000nM_C2_vs_Aplan_7298_NR_Parent	chr8	123420656	123420656	C	G	Tubb3	c.327C>G	p.Gly109Gly	synonymous_variant	LOW	47	0	0.024	33	10	0.335	4.25013
Aplan_7298_NR_1000nM_C2_vs_Aplan_7298_NR_Parent	chr8	123421266	123421266	G	C	Tubb3	c.937G>C	p.Val313Leu	missense_variant	MODERATE	84	0	0.013	55	18	0.328	6.49931
Aplan_7298_NR_1000nM_C2_vs_Aplan_7298_NR_Parent	chr8	125032504	125032504	C	G	Tsnax	c.503C>G	p.Ala168Gly	missense_variant	MODERATE	77	0	0.016	49	15	0.326	6.81497
Aplan_7298_NR_1000nM_C2_vs_Aplan_7298_NR_Parent	chr8	125670059	125670059	G	C	Map10	c.190G>C	p.Gly64Arg	missense_variant	MODERATE	24	0	0.04	16	6	0.389	2.68062
Aplan_7298_NR_1000nM_C2_vs_Aplan_7298_NR_Parent	chr9	5302436	5302436	C	G	Casp1	c.357C>G	p.Asn119Lys	missense_variant	MODERATE	69	0	0.016	40	9	0.25	4.1929
Aplan_7298_NR_1000nM_C2_vs_Aplan_7298_NR_Parent	chr9	7176883	7176883	C	G	Dync2h1	c.75G>C	p.Pro25Pro	synonymous_variant	LOW	52	0	0.022	35	10	0.345	4.33832
Aplan_7298_NR_1000nM_C2_vs_Aplan_7298_NR_Parent	chr9	14740478	14740478	G	C	Piwil4	c.256C>G	p.Arg86Gly	missense_variant	MODERATE	80	0	0.014	49	14	0.32	6.46074
Aplan_7298_NR_1000nM_C2_vs_Aplan_7298_NR_Parent	chr9	14750823	14750823	G	A	Fut4	c.1174C>T	p.Arg392Cys	missense_variant	MODERATE	44	0	0.023	26	6	0.25	2.75549
Aplan_7298_NR_1000nM_C2_vs_Aplan_7298_NR_Parent	chr9	18409505	18409505	C	T	Ubtfl1	c.328C>T	p.Arg110Cys	missense_variant	MODERATE	63	0	0.017	34	8	0.265	3.9009
Aplan_7298_NR_1000nM_C2_vs_Aplan_7298_NR_Parent	chr9	20889380	20889380	G	C	Ppan	c.232G>C	p.Gly78Arg	missense_variant	MODERATE	72	0	0.016	60	15	0.246	5.60739
Aplan_7298_NR_1000nM_C2_vs_Aplan_7298_NR_Parent	chr9	20967587	20967587	C	G	S1pr2	c.944G>C	p.Arg315Pro	missense_variant	MODERATE	55	0	0.018	32	8	0.239	3.74472
Aplan_7298_NR_1000nM_C2_vs_Aplan_7298_NR_Parent	chr9	21027453	21027453	C	G	Icam1	c.1211C>G	p.Thr404Arg	missense_variant	MODERATE	111	1	0.011	74	15	0.2	5.34367
Aplan_7298_NR_1000nM_C2_vs_Aplan_7298_NR_Parent	chr9	21035478	21035478	G	C	Icam5	c.1301G>C	p.Arg434Pro	missense_variant	MODERATE	52	0	0.02	25	5	0.231	2.5704
Aplan_7298_NR_1000nM_C2_vs_Aplan_7298_NR_Parent	chr9	21035526	21035526	C	G	Icam5	c.1349C>G	p.Ala450Gly	missense_variant	MODERATE	50	0	0.02	23	6	0.279	3.22694
Aplan_7298_NR_1000nM_C2_vs_Aplan_7298_NR_Parent	chr9	21107893	21107893	G	C	Tyk2	c.3232C>G	p.Arg1078Gly	missense_variant	MODERATE	63	0	0.018	23	8	0.384	5.0343
Aplan_7298_NR_1000nM_C2_vs_Aplan_7298_NR_Parent	chr9	21206270	21206270	C	G	Pde4a	c.1827C>G	p.Arg609Arg	synonymous_variant	LOW	55	0	0.019	24	9	0.419	5.19703
Aplan_7298_NR_1000nM_C2_vs_Aplan_7298_NR_Parent	chr9	21305376	21305376	C	G	Ap1m2	c.579G>C	p.Glu193Asp	missense_variant	MODERATE	52	0	0.02	23	7	0.32	3.90828
Aplan_7298_NR_1000nM_C2_vs_Aplan_7298_NR_Parent	chr9	21305378	21305378	C	G	Ap1m2	c.577G>C	p.Glu193Gln	missense_variant	MODERATE	52	0	0.019	23	7	0.32	3.90828
Aplan_7298_NR_1000nM_C2_vs_Aplan_7298_NR_Parent	chr9	21342635	21342635	C	G	Slc44a2	c.479C>G	p.Ala160Gly	missense_variant	MODERATE	64	0	0.016	43	10	0.25	4.26307
Aplan_7298_NR_1000nM_C2_vs_Aplan_7298_NR_Parent	chr9	21412056	21412056	C	G	Qtrt1	c.202C>G	p.Arg68Gly	missense_variant	MODERATE	79	0	0.014	55	14	0.285	5.89485
Aplan_7298_NR_1000nM_C2_vs_Aplan_7298_NR_Parent	chr9	21419312	21419312	C	G	Qtrt1	c.807C>G	p.Val269Val	synonymous_variant	LOW	141	0	0.008227	88	26	0.284	6.3931
Aplan_7298_NR_1000nM_C2_vs_Aplan_7298_NR_Parent	chr9	21474563	21474563	C	G	Dnm2	c.881C>G	p.Pro294Arg	missense_variant	MODERATE	193	0	0.006513	92	26	0.268	6.88908
Aplan_7298_NR_1000nM_C2_vs_Aplan_7298_NR_Parent	chr9	21569490	21569490	C	G	Carm1	c.259C>G	p.Arg87Gly	missense_variant	MODERATE	102	0	0.011	88	21	0.252	5.83555
Aplan_7298_NR_1000nM_C2_vs_Aplan_7298_NR_Parent	chr9	21658856	21658856	C	G	Smarca4	c.2154C>G	p.Tyr718*	stop_gained	HIGH	51	0	0.021	44	10	0.211	3.60986
Aplan_7298_NR_1000nM_C2_vs_Aplan_7298_NR_Parent	chr9	21915819	21915819	G	C	Rab3d	c.114C>G	p.Phe38Leu	missense_variant	MODERATE	48	0	0.024	25	8	0.308	4.09441
Aplan_7298_NR_1000nM_C2_vs_Aplan_7298_NR_Parent	chr9	22360860	22360860	G	C	Anln	c.1962C>G	p.Ala654Ala	synonymous_variant	LOW	72	0	0.016	60	20	0.339	6.18678
Aplan_7298_NR_1000nM_C2_vs_Aplan_7298_NR_Parent	chr9	24695990	24695990	G	C	Dpy19l2	c.174C>G	p.Gly58Gly	synonymous_variant	LOW	28	0	0.037	29	5	0.241	1.28538
Aplan_7298_NR_1000nM_C2_vs_Aplan_7298_NR_Parent	chr9	24770864	24770864	C	G	Tbx20	c.193G>C	p.Ala65Pro	missense_variant	MODERATE	103	0	0.011	34	12	0.364	6.26762
Aplan_7298_NR_1000nM_C2_vs_Aplan_7298_NR_Parent	chr9	28813324	28813324	C	G	Opcml	c.417C>G	p.Thr139Thr	synonymous_variant	LOW	68	0	0.018	48	9	0.216	3.6576
Aplan_7298_NR_1000nM_C2_vs_Aplan_7298_NR_Parent	chr9	32257583	32257583	C	G	Arhgap32	c.3908C>G	p.Thr1303Arg	missense_variant	MODERATE	72	0	0.014	42	8	0.204	3.66864
Aplan_7298_NR_1000nM_C2_vs_Aplan_7298_NR_Parent	chr9	37384591	37384591	C	G	Hepacam	c.1037C>G	p.Pro346Arg	missense_variant	MODERATE	22	0	0.045	22	5	0.238	1.31429
Aplan_7298_NR_1000nM_C2_vs_Aplan_7298_NR_Parent	chr9	43020649	43020649	C	G	Arhgef12	c.541G>C	p.Ala181Pro	missense_variant	MODERATE	51	0	0.024	25	7	0.296	3.65781
Aplan_7298_NR_1000nM_C2_vs_Aplan_7298_NR_Parent	chr9	44046793	44046793	C	G	Thy1	c.217C>G	p.His73Asp	missense_variant	MODERATE	72	0	0.015	46	14	0.302	6.33747
Aplan_7298_NR_1000nM_C2_vs_Aplan_7298_NR_Parent	chr9	44090140	44090140	G	T	Usp2	c.978G>T	p.Thr326Thr	synonymous_variant	LOW	68	0	0.015	40	9	0.224	4.15547
Aplan_7298_NR_1000nM_C2_vs_Aplan_7298_NR_Parent	chr9	44111891	44111891	G	C	Rnf26	c.1059C>G	p.Ala353Ala	synonymous_variant	LOW	35	0	0.032	23	7	0.332	3.08865
Aplan_7298_NR_1000nM_C2_vs_Aplan_7298_NR_Parent	chr9	44243037	44243037	C	G	Ccdc153	c.160C>G	p.Arg54Gly	missense_variant	MODERATE	23	0	0.043	14	7	0.5	3.4771
Aplan_7298_NR_1000nM_C2_vs_Aplan_7298_NR_Parent	chr9	44287246	44287246	C	G	Abcg4	c.208G>C	p.Val70Leu	missense_variant	MODERATE	39	0	0.03	21	9	0.445	4.70152
Aplan_7298_NR_1000nM_C2_vs_Aplan_7298_NR_Parent	chr9	44316344	44316344	C	G	C2cd2l	c.872G>C	p.Arg291Pro	missense_variant	MODERATE	54	0	0.021	29	8	0.31	3.9633
Aplan_7298_NR_1000nM_C2_vs_Aplan_7298_NR_Parent	chr9	44453897	44453897	C	G	Upk2	c.245G>C	p.Gly82Ala	missense_variant	MODERATE	89	0	0.012	59	15	0.249	6.5178
Aplan_7298_NR_1000nM_C2_vs_Aplan_7298_NR_Parent	chr9	44454082	44454082	C	T	Upk2	c.188G>A	p.Arg63Gln	missense_variant	MODERATE	82	0	0.014	51	14	0.276	6.37427
Aplan_7298_NR_1000nM_C2_vs_Aplan_7298_NR_Parent	chr9	46242760	46242760	C	G	Apoa4	c.658C>G	p.Arg220Gly	missense_variant	MODERATE	41	0	0.027	24	5	0.218	2.28854
Aplan_7298_NR_1000nM_C2_vs_Aplan_7298_NR_Parent	chr9	48659811	48659811	C	G	Zbtb16	c.1654G>C	p.Gly552Arg	missense_variant	MODERATE	17	0	0.07	14	6	0.434	2.38949
Aplan_7298_NR_1000nM_C2_vs_Aplan_7298_NR_Parent	chr9	49557158	49557158	C	G	Ncam1	c.1000G>C	p.Gly334Arg	missense_variant	MODERATE	73	0	0.016	49	10	0.268	4.22456
Aplan_7298_NR_1000nM_C2_vs_Aplan_7298_NR_Parent	chr9	50621176	50621176	C	T	Pih1d2	c.533C>T	p.Ala178Val	missense_variant	MODERATE	43	0	0.025	38	10	0.289	3.59917
Aplan_7298_NR_1000nM_C2_vs_Aplan_7298_NR_Parent	chr9	50770265	50770265	G	C	Fdxacb1	c.485G>C	p.Cys162Ser	missense_variant	MODERATE	42	0	0.027	29	7	0.287	2.93047
Aplan_7298_NR_1000nM_C2_vs_Aplan_7298_NR_Parent	chr9	57019966	57019966	C	G	Ptpn9	c.126C>G	p.Leu42Leu	synonymous_variant	LOW	47	0	0.024	57	14	0.261	3.9954
Aplan_7298_NR_1000nM_C2_vs_Aplan_7298_NR_Parent	chr9	57036745	57036745	G	C	Ptpn9	c.902G>C	p.Arg301Pro	missense_variant	MODERATE	79	0	0.014	70	19	0.296	6.88235
Aplan_7298_NR_1000nM_C2_vs_Aplan_7298_NR_Parent	chr9	57451416	57451416	C	G	Scamp5	c.76G>C	p.Glu26Gln	missense_variant	MODERATE	100	0	0.011	79	19	0.236	7.34278
Aplan_7298_NR_1000nM_C2_vs_Aplan_7298_NR_Parent	chr9	57579508	57579508	C	G	Scamp2	c.301C>G	p.Arg101Gly	missense_variant	MODERATE	41	0	0.028	22	5	0.227	2.42637
Aplan_7298_NR_1000nM_C2_vs_Aplan_7298_NR_Parent	chr9	57587118	57587118	C	G	Scamp2	c.773C>G	p.Pro258Arg	missense_variant	MODERATE	50	0	0.023	39	10	0.277	3.90301
Aplan_7298_NR_1000nM_C2_vs_Aplan_7298_NR_Parent	chr9	58199462	58199462	C	G	Islr2	c.646G>C	p.Ala216Pro	missense_variant	MODERATE	80	0	0.014	31	10	0.31	6.06524
Aplan_7298_NR_1000nM_C2_vs_Aplan_7298_NR_Parent	chr9	59894876	59894876	C	G	Myo9a	c.5960C>G	p.Ala1987Gly	missense_variant&splice_region_variant	MODERATE	65	0	0.017	51	17	0.333	6.84011
Aplan_7298_NR_1000nM_C2_vs_Aplan_7298_NR_Parent	chr9	59900441	59900441	A	G	Myo9a	c.6290A>G	p.Asp2097Gly	missense_variant	MODERATE	45	0	0.025	23	7	0.364	3.59708
Aplan_7298_NR_1000nM_C2_vs_Aplan_7298_NR_Parent	chr9	62755281	62755281	G	C	Itga11	c.1535G>C	p.Arg512Pro	missense_variant	MODERATE	69	0	0.016	49	12	0.238	4.96601
Aplan_7298_NR_1000nM_C2_vs_Aplan_7298_NR_Parent	chr9	65415221	65415221	C	G	Slc51b	c.37G>C	p.Glu13Gln	missense_variant	MODERATE	176	0	0.007141	114	29	0.245	6.10336
Aplan_7298_NR_1000nM_C2_vs_Aplan_7298_NR_Parent	chr9	65556319	65556319	C	G	Plekho2	c.1247G>C	p.Arg416Pro	missense_variant	MODERATE	66	0	0.016	40	11	0.274	5.08009
Aplan_7298_NR_1000nM_C2_vs_Aplan_7298_NR_Parent	chr9	66834506	66834506	G	C	Aph1c	c.93C>G	p.Arg31Arg	synonymous_variant	LOW	73	0	0.016	39	8	0.206	3.8881
Aplan_7298_NR_1000nM_C2_vs_Aplan_7298_NR_Parent	chr9	66834518	66834518	G	C	Aph1c	c.81C>G	p.Thr27Thr	synonymous_variant	LOW	75	0	0.016	40	13	0.323	6.60855
Aplan_7298_NR_1000nM_C2_vs_Aplan_7298_NR_Parent	chr9	67831512	67831512	G	T	C2cd4a	c.248C>A	p.Ala83Glu	missense_variant	MODERATE	48	0	0.021	36	8	0.258	3.15856
Aplan_7298_NR_1000nM_C2_vs_Aplan_7298_NR_Parent	chr9	67923684	67923684	C	T	Vps13c	c.4595C>T	p.Ser1532Leu	missense_variant	MODERATE	113	0	0.01	70	18	0.264	6.58186
Aplan_7298_NR_1000nM_C2_vs_Aplan_7298_NR_Parent	chr9	68653850	68653850	C	G	Rora	c.44C>G	p.Pro15Arg	missense_variant	MODERATE	28	0	0.037	18	6	0.333	2.70292
Aplan_7298_NR_1000nM_C2_vs_Aplan_7298_NR_Parent	chr9	72491803	72491803	C	G	Tex9	c.43G>C	p.Gly15Arg	missense_variant	MODERATE	57	0	0.02	30	8	0.275	3.99929
Aplan_7298_NR_1000nM_C2_vs_Aplan_7298_NR_Parent	chr9	79616068	79616068	C	G	Col12a1	c.8226G>C	p.Thr2742Thr	synonymous_variant	LOW	146	1	0.008943	95	29	0.31	6.56896
Aplan_7298_NR_1000nM_C2_vs_Aplan_7298_NR_Parent	chr9	79818581	79818581	C	G	Filip1	c.2755G>C	p.Glu919Gln	missense_variant	MODERATE	121	0	0.008921	92	25	0.281	6.51283
Aplan_7298_NR_1000nM_C2_vs_Aplan_7298_NR_Parent	chr9	86520000	86520000	C	G	Dopey1	c.3252C>G	p.Ser1084Arg	missense_variant	MODERATE	68	0	0.016	68	23	0.334	6.05309
Aplan_7298_NR_1000nM_C2_vs_Aplan_7298_NR_Parent	chr9	89728930	89728930	G	C	Ankrd34c	c.1357C>G	p.Arg453Gly	missense_variant	MODERATE	65	0	0.017	36	10	0.297	4.87843
Aplan_7298_NR_1000nM_C2_vs_Aplan_7298_NR_Parent	chr9	96685782	96685782	G	C	Zbtb38	c.3248C>G	p.Thr1083Arg	missense_variant	MODERATE	125	0	0.009649	78	17	0.237	6.03229
Aplan_7298_NR_1000nM_C2_vs_Aplan_7298_NR_Parent	chr9	102542565	102542565	C	G	Ky	c.1770C>G	p.Pro590Pro	synonymous_variant	LOW	53	0	0.02	34	8	0.235	3.50764
Aplan_7298_NR_1000nM_C2_vs_Aplan_7298_NR_Parent	chr9	103191102	103191102	G	C	Srprb	c.563C>G	p.Ala188Gly	missense_variant	MODERATE	82	0	0.015	53	14	0.292	6.20031
Aplan_7298_NR_1000nM_C2_vs_Aplan_7298_NR_Parent	chr9	105755558	105755558	C	G	Col6a6	c.4415G>C	p.Gly1472Ala	missense_variant&splice_region_variant	MODERATE	120	0	0.009371	72	27	0.416	5.82142
Aplan_7298_NR_1000nM_C2_vs_Aplan_7298_NR_Parent	chr9	105939891	105939891	C	G	Col6a5	c.1220G>C	p.Gly407Ala	missense_variant	MODERATE	105	0	0.01	57	16	0.29	6.32366
Aplan_7298_NR_1000nM_C2_vs_Aplan_7298_NR_Parent	chr9	106698129	106698129	C	G	Rad54l2	c.3305G>C	p.Arg1102Pro	missense_variant	MODERATE	150	0	0.008484	95	25	0.286	6.90549
Aplan_7298_NR_1000nM_C2_vs_Aplan_7298_NR_Parent	chr9	107526683	107526683	C	G	Cacna2d2	c.3002-5C>G		splice_region_variant&intron_variant	LOW	52	0	0.02	30	6	0.234	2.77065
Aplan_7298_NR_1000nM_C2_vs_Aplan_7298_NR_Parent	chr9	107599118	107599118	G	C	Sema3b	c.1903C>G	p.Arg635Gly	missense_variant	MODERATE	41	0	0.028	21	5	0.288	2.50243
Aplan_7298_NR_1000nM_C2_vs_Aplan_7298_NR_Parent	chr9	107599150	107599150	C	G	Sema3b	c.1871G>C	p.Arg624Pro	missense_variant	MODERATE	38	0	0.03	16	6	0.375	3.50855
Aplan_7298_NR_1000nM_C2_vs_Aplan_7298_NR_Parent	chr9	107615692	107615692	G	C	Gnai2	c.1011C>G	p.Phe337Leu	missense_variant	MODERATE	45	0	0.023	31	10	0.314	4.33287
Aplan_7298_NR_1000nM_C2_vs_Aplan_7298_NR_Parent	chr9	107615738	107615738	G	C	Gnai2	c.965C>G	p.Thr322Arg	missense_variant	MODERATE	60	0	0.019	37	13	0.335	6.11673
Aplan_7298_NR_1000nM_C2_vs_Aplan_7298_NR_Parent	chr9	107912180	107912180	C	G	Mst1r	c.1657C>G	p.Arg553Gly	missense_variant	MODERATE	102	0	0.011	66	18	0.281	6.41847
Aplan_7298_NR_1000nM_C2_vs_Aplan_7298_NR_Parent	chr9	108106867	108106867	G	C	Bsn	c.9987C>G	p.Tyr3329*	stop_gained	HIGH	104	0	0.01	59	18	0.304	7.12001
Aplan_7298_NR_1000nM_C2_vs_Aplan_7298_NR_Parent	chr9	108574351	108574351	G	C	Wdr6	c.2332C>G	p.Arg778Gly	missense_variant	MODERATE	46	0	0.022	35	7	0.235	2.71357
Aplan_7298_NR_1000nM_C2_vs_Aplan_7298_NR_Parent	chr9	108579101	108579101	C	G	P4htm	c.1499G>C	p.Arg500Pro	missense_variant	MODERATE	27	0	0.035	26	6	0.231	1.99876
Aplan_7298_NR_1000nM_C2_vs_Aplan_7298_NR_Parent	chr9	108728248	108728248	C	G	Prkar2a	c.504C>G	p.Gly168Gly	synonymous_variant	LOW	89	0	0.013	66	19	0.302	6.23463
Aplan_7298_NR_1000nM_C2_vs_Aplan_7298_NR_Parent	chr9	108827738	108827738	C	G	Celsr3	c.1419C>G	p.Ala473Ala	synonymous_variant	LOW	77	0	0.014	44	11	0.251	5.22135
Aplan_7298_NR_1000nM_C2_vs_Aplan_7298_NR_Parent	chr9	108860619	108860619	G	C	Slc26a6	c.1550G>C	p.Gly517Ala	missense_variant	MODERATE	117	0	0.01	64	18	0.281	7.23487
Aplan_7298_NR_1000nM_C2_vs_Aplan_7298_NR_Parent	chr9	110320820	110320820	C	G	Elp6	c.678C>G	p.Ser226Arg	missense_variant	MODERATE	76	0	0.015	49	13	0.237	5.76575
Aplan_7298_NR_1000nM_C2_vs_Aplan_7298_NR_Parent	chr9	110629847	110629847	G	C	Nbeal2	c.6109C>G	p.Arg2037Gly	missense_variant	MODERATE	115	0	0.00974	52	11	0.229	5.92154
Aplan_7298_NR_1000nM_C2_vs_Aplan_7298_NR_Parent	chr9	111235998	111235998	G	A	Mlh1	c.1588C>T	p.Arg530Cys	missense_variant	MODERATE	36	0	0.033	23	9	0.412	4.18686
[truncated: 5,022 more rows]
