# Supplementary material for: 5-Aza-4’-thio-2’-deoxycytidine induces C&gt;G transversions in a specific trinucleotide context and leads to acute lymphoid leukemia
Source: Research Square preprint supplement (doi:10.21203/rs.3.rs-3186246/v1), 2023-12-19
Supplement: Supplementary file 10 [file aa3e0c325eedf05bbb4f33d4.xlsx]

## Sheet: NHD13 IR Experiments
SampleName	Chr	Start	End	REF	ALT	Gene_Name	HGVS.c	HGVS.p	Annotation	Annotation_Impact	DP_NORMAL	AD_NORMAL.2	AF_NORMAL	DP_TUMOR	AD_TUMOR.2	AF_TUMOR	LOG_FISHER
Aplan-10-3617-BM_vs_Aplan-10th-Exp-NHD13-Donor-plus-Pooled-Tail-Ref	chr1	36311949	36311949	C	G	Arid5a	c.72C>G	p.His24Gln	missense_variant	MODERATE	172	0	0.007587	35	11	0.353	7.25207
Aplan-10-3617-BM_vs_Aplan-10th-Exp-NHD13-Donor-plus-Pooled-Tail-Ref	chr1	56899122	56899122	G	A	Satb2	c.347-5C>T		splice_region_variant&intron_variant	LOW	113	0	0.01	41	16	0.396	6.9671
Aplan-10-3617-BM_vs_Aplan-10th-Exp-NHD13-Donor-plus-Pooled-Tail-Ref	chr1	87099533	87099533	C	T	Alpi	c.1023G>A	p.Ala341Ala	synonymous_variant	LOW	215	0	0.005229	37	15	0.428	6.83279
Aplan-10-3617-BM_vs_Aplan-10th-Exp-NHD13-Donor-plus-Pooled-Tail-Ref	chr1	90960041	90960041	G	C	Rab17	c.396C>G	p.Asn132Lys	missense_variant	MODERATE	181	0	0.007634	19	6	0.315	6.48249
Aplan-10-3617-BM_vs_Aplan-10th-Exp-NHD13-Donor-plus-Pooled-Tail-Ref	chr1	157529202	157529202	G	C	Sec16b	c.-22G>C		5_prime_UTR_variant	MODIFIER	109	0	0.01	19	9	0.5	6.3595
Aplan-10-3617-BM_vs_Aplan-10th-Exp-NHD13-Donor-plus-Pooled-Tail-Ref	chr1	163829209	163829209	G	C	Kifap3	c.1097G>C	p.Arg366Pro	missense_variant	MODERATE	322	0	0.003827	119	31	0.269	6.00772
Aplan-10-3617-BM_vs_Aplan-10th-Exp-NHD13-Donor-plus-Pooled-Tail-Ref	chr1	172244856	172244856	G	C	Atp1a4	c.1230C>G	p.Ala410Ala	synonymous_variant	LOW	253	1	0.004818	52	23	0.442	6.73188
Aplan-10-3617-BM_vs_Aplan-10th-Exp-NHD13-Donor-plus-Pooled-Tail-Ref	chr1	175978796	175978796	G	C	Pld5	c.1071-3169C>G		intron_variant	MODIFIER	346	0	0.003147	77	29	0.357	6.34123
Aplan-10-3617-BM_vs_Aplan-10th-Exp-NHD13-Donor-plus-Pooled-Tail-Ref	chr2	38354513	38354513	C	G	Lhx2	c.388C>G	p.Arg130Gly	missense_variant	MODERATE	280	1	0.004602	53	16	0.313	6.55781
Aplan-10-3617-BM_vs_Aplan-10th-Exp-NHD13-Donor-plus-Pooled-Tail-Ref	chr2	71279594	71279594	C	G	Slc25a12	c.1507G>C	p.Ala503Pro	missense_variant	MODERATE	166	0	0.007989	34	12	0.387	6.52015
Aplan-10-3617-BM_vs_Aplan-10th-Exp-NHD13-Donor-plus-Pooled-Tail-Ref	chr2	156067102	156067102	G	C	Spag4	c.558G>C	p.Gly186Gly	synonymous_variant	LOW	234	0	0.005159	39	22	0.563	6.52924
Aplan-10-3617-BM_vs_Aplan-10th-Exp-NHD13-Donor-plus-Pooled-Tail-Ref	chr2	174457596	174457596	C	G	Tubb1	c.1070C>G	p.Pro357Arg	missense_variant	MODERATE	148	0	0.00767	39	12	0.371	7.0239
Aplan-10-3617-BM_vs_Aplan-10th-Exp-NHD13-Donor-plus-Pooled-Tail-Ref	chr3	33808758	33808758	C	G	Ttc14	c.1470C>G	p.Ser490Ser	synonymous_variant	LOW	216	0	0.005575	58	21	0.372	6.51659
Aplan-10-3617-BM_vs_Aplan-10th-Exp-NHD13-Donor-plus-Pooled-Tail-Ref	chr3	41601318	41601318	C	G	Jade1	c.868-49C>G		intron_variant	MODIFIER	131	0	0.009078	33	11	0.333	6.52269
Aplan-10-3617-BM_vs_Aplan-10th-Exp-NHD13-Donor-plus-Pooled-Tail-Ref	chr3	63927312	63927312	C	G	E130311K13Rik	c.126G>C	p.Thr42Thr	synonymous_variant	LOW	358	0	0.003519	98	38	0.379	6.52036
Aplan-10-3617-BM_vs_Aplan-10th-Exp-NHD13-Donor-plus-Pooled-Tail-Ref	chr3	86445502	86445502	C	G	Lrba	c.5927+29C>G		intron_variant	MODIFIER	149	0	0.007644	57	23	0.389	6.97215
Aplan-10-3617-BM_vs_Aplan-10th-Exp-NHD13-Donor-plus-Pooled-Tail-Ref	chr3	94388929	94388929	C	G	Rorc	c.477C>G	p.Gly159Gly	synonymous_variant	LOW	150	0	0.007853	27	10	0.333	6.95538
Aplan-10-3617-BM_vs_Aplan-10th-Exp-NHD13-Donor-plus-Pooled-Tail-Ref	chr3	95983359	95983359	C	G	Gm9054	n.-2151C>G		upstream_gene_variant	MODIFIER	138	0	0.009258	37	15	0.414	6.34275
Aplan-10-3617-BM_vs_Aplan-10th-Exp-NHD13-Donor-plus-Pooled-Tail-Ref	chr3	103058958	103058958	G	C	Nras	c.37G>C	p.Gly13Arg	missense_variant	MODERATE	518	0	0.002521	84	26	0.319	6.03875
Aplan-10-3617-BM_vs_Aplan-10th-Exp-NHD13-Donor-plus-Pooled-Tail-Ref	chr3	121486309	121486309	G	A	Slc44a3	c.1444C>T	p.His482Tyr	missense_variant	MODERATE	78	0	0.014	28	12	0.417	6.11075
Aplan-10-3617-BM_vs_Aplan-10th-Exp-NHD13-Donor-plus-Pooled-Tail-Ref	chr3	122007563	122007563	G	C	Arhgap29	c.1946G>C	p.Arg649Pro	missense_variant	MODERATE	191	0	0.00604	69	24	0.367	6.62184
Aplan-10-3617-BM_vs_Aplan-10th-Exp-NHD13-Donor-plus-Pooled-Tail-Ref	chr3	124322095	124322095	G	C	Tram1l1	c.903G>C	p.Ser301Ser	synonymous_variant	LOW	169	0	0.006575	52	23	0.419	6.09945
Aplan-10-3617-BM_vs_Aplan-10th-Exp-NHD13-Donor-plus-Pooled-Tail-Ref	chr4	41629782	41629782	G	C	Dnaic1	c.1315-10G>C		intron_variant	MODIFIER	167	0	0.006897	68	30	0.4	6.19102
Aplan-10-3617-BM_vs_Aplan-10th-Exp-NHD13-Donor-plus-Pooled-Tail-Ref	chr4	104790631	104790631	G	C	C8b	c.1018G>C	p.Gly340Arg	missense_variant	MODERATE	172	0	0.007141	39	8	0.237	6.14137
Aplan-10-3617-BM_vs_Aplan-10th-Exp-NHD13-Donor-plus-Pooled-Tail-Ref	chr4	116088546	116088546	C	G	Lrrc41	c.457C>G	p.Arg153Gly	missense_variant	MODERATE	371	0	0.003246	84	24	0.305	5.99069
Aplan-10-3617-BM_vs_Aplan-10th-Exp-NHD13-Donor-plus-Pooled-Tail-Ref	chr4	154015857	154015857	G	A	Lrrc47	c.823G>A	p.Ala275Thr	missense_variant	MODERATE	168	0	0.006911	13	10	0.692	6.77672
Aplan-10-3617-BM_vs_Aplan-10th-Exp-NHD13-Donor-plus-Pooled-Tail-Ref	chr4	155649616	155649616	G	C	Cdk11b	c.2262+5G>C		splice_region_variant&intron_variant	LOW	212	0	0.005428	51	18	0.362	6.25596
Aplan-10-3617-BM_vs_Aplan-10th-Exp-NHD13-Donor-plus-Pooled-Tail-Ref	chr5	118762739	118762739	C	G	Med13l	c.6530C>G	p.Thr2177Arg	missense_variant	MODERATE	95	0	0.012	17	5	0.313	4.33605
Aplan-10-3617-BM_vs_Aplan-10th-Exp-NHD13-Donor-plus-Pooled-Tail-Ref	chr5	128800970	128800970	C	G	Rimbp2	c.651G>C	p.Ala217Ala	synonymous_variant	LOW	398	1	0.003252	79	30	0.397	6.3692
Aplan-10-3617-BM_vs_Aplan-10th-Exp-NHD13-Donor-plus-Pooled-Tail-Ref	chr5	150067230	150067230	C	G	Rxfp2	c.1455C>G	p.Ala485Ala	synonymous_variant	LOW	139	0	0.008156	33	10	0.29	7.71332
Aplan-10-3617-BM_vs_Aplan-10th-Exp-NHD13-Donor-plus-Pooled-Tail-Ref	chr6	34880800	34880800	G	C	Wdr91	c.*4C>G		3_prime_UTR_variant	MODIFIER	115	0	0.01	20	6	0.315	5.28736
Aplan-10-3617-BM_vs_Aplan-10th-Exp-NHD13-Donor-plus-Pooled-Tail-Ref	chr6	48485488	48485488	C	G	Sspo	c.11184+8C>G		splice_region_variant&intron_variant	LOW	68	0	0.018	15	8	0.538	6.78742
Aplan-10-3617-BM_vs_Aplan-10th-Exp-NHD13-Donor-plus-Pooled-Tail-Ref	chr6	73188436	73188436	G	C	Dnah6	c.1685C>G	p.Pro562Arg	missense_variant	MODERATE	166	1	0.007205	59	30	0.48	6.77554
Aplan-10-3617-BM_vs_Aplan-10th-Exp-NHD13-Donor-plus-Pooled-Tail-Ref	chr6	137537688	137537688	G	C	Eps8	c.144C>G	p.Tyr48*	stop_gained	HIGH	217	1	0.005757	60	32	0.521	6.70321
Aplan-10-3617-BM_vs_Aplan-10th-Exp-NHD13-Donor-plus-Pooled-Tail-Ref	chr6	139772481	139772481	C	G	Pik3c2g	c.1087C>G	p.Arg363Gly	missense_variant	MODERATE	288	0	0.004325	60	18	0.313	6.806
Aplan-10-3617-BM_vs_Aplan-10th-Exp-NHD13-Donor-plus-Pooled-Tail-Ref	chr6	148354881	148354881	G	C	Tmtc1	c.933-18549C>G		intron_variant	MODIFIER	233	0	0.00492	42	11	0.27	6.05014
Aplan-10-3617-BM_vs_Aplan-10th-Exp-NHD13-Donor-plus-Pooled-Tail-Ref	chr7	24760248	24760248	C	G	Cd177	c.39G>C	p.Thr13Thr	synonymous_variant	LOW	158	0	0.007442	37	15	0.402	6.90075
Aplan-10-3617-BM_vs_Aplan-10th-Exp-NHD13-Donor-plus-Pooled-Tail-Ref	chr7	29562329	29562329	C	G	Sipa1l3-Catsperg2	n.29562329C>G		intergenic_region	MODIFIER	507	1	0.002349	108	44	0.404	6.35228
Aplan-10-3617-BM_vs_Aplan-10th-Exp-NHD13-Donor-plus-Pooled-Tail-Ref	chr7	64348959	64348959	G	C	Fan1	c.2814C>G	p.Leu938Leu	synonymous_variant	LOW	72	0	0.016	39	18	0.441	6.37611
Aplan-10-3617-BM_vs_Aplan-10th-Exp-NHD13-Donor-plus-Pooled-Tail-Ref	chr7	98458734	98458734	G	C	Gucy2d	c.2097G>C	p.Glu699Asp	missense_variant	MODERATE	268	0	0.004319	53	17	0.304	6.37464
Aplan-10-3617-BM_vs_Aplan-10th-Exp-NHD13-Donor-plus-Pooled-Tail-Ref	chr7	101501946	101501946	C	G	Pde2a	c.843+18C>G		intron_variant	MODIFIER	120	0	0.009934	32	10	0.321	7.31769
Aplan-10-3617-BM_vs_Aplan-10th-Exp-NHD13-Donor-plus-Pooled-Tail-Ref	chr7	101786246	101786246	C	G	Clpb	c.1561-41C>G		intron_variant	MODIFIER	347	1	0.003472	73	26	0.338	6.37568
Aplan-10-3617-BM_vs_Aplan-10th-Exp-NHD13-Donor-plus-Pooled-Tail-Ref	chr7	105435144	105435144	C	G	Cckbr	c.1084C>G	p.Arg362Gly	missense_variant	MODERATE	179	0	0.005948	44	20	0.486	6.48465
Aplan-10-3617-BM_vs_Aplan-10th-Exp-NHD13-Donor-plus-Pooled-Tail-Ref	chr7	120246953	120246953	C	G	Abca14	c.1826C>G	p.Pro609Arg	missense_variant	MODERATE	242	0	0.004767	84	18	0.253	6.66198
Aplan-10-3617-BM_vs_Aplan-10th-Exp-NHD13-Donor-plus-Pooled-Tail-Ref	chr7	127600543	127600543	C	T	Rnf40	c.2746C>T	p.Arg916Trp	missense_variant	MODERATE	212	0	0.006088	44	19	0.447	6.56082
Aplan-10-3617-BM_vs_Aplan-10th-Exp-NHD13-Donor-plus-Pooled-Tail-Ref	chr8	12639711	12639711	C	T	Tubgcp3	c.1554G>A	p.Ala518Ala	synonymous_variant	LOW	166	0	0.007564	42	17	0.385	6.65069
Aplan-10-3617-BM_vs_Aplan-10th-Exp-NHD13-Donor-plus-Pooled-Tail-Ref	chr8	62096689	62096689	G	C	Anxa10	c.100+21C>G		intron_variant	MODIFIER	96	0	0.013	27	15	0.546	6.4347
Aplan-10-3617-BM_vs_Aplan-10th-Exp-NHD13-Donor-plus-Pooled-Tail-Ref	chr8	70887845	70887845	C	G	Slc5a5	c.1360G>C	p.Ala454Pro	missense_variant	MODERATE	82	0	0.013	18	8	0.421	6.62866
Aplan-10-3617-BM_vs_Aplan-10th-Exp-NHD13-Donor-plus-Pooled-Tail-Ref	chr8	84223663	84223663	C	G	Zswim4	c.1909+8G>C		splice_region_variant&intron_variant	LOW	99	0	0.011	22	6	0.35	4.71189
Aplan-10-3617-BM_vs_Aplan-10th-Exp-NHD13-Donor-plus-Pooled-Tail-Ref	chr8	84223812	84223812	G	C	Zswim4	c.1768C>G	p.Gln590Glu	missense_variant	MODERATE	177	0	0.007096	20	8	0.45	6.54633
Aplan-10-3617-BM_vs_Aplan-10th-Exp-NHD13-Donor-plus-Pooled-Tail-Ref	chr8	122785841	122785841	G	C	Acsf3	c.1000G>C	p.Ala334Pro	missense_variant	MODERATE	133	0	0.009457	23	10	0.45	7.20286
Aplan-10-3617-BM_vs_Aplan-10th-Exp-NHD13-Donor-plus-Pooled-Tail-Ref	chr9	59313828	59313828	C	G	Adpgk	c.916C>G	p.Leu306Val	missense_variant	MODERATE	257	0	0.005047	78	24	0.328	6.47094
Aplan-10-3617-BM_vs_Aplan-10th-Exp-NHD13-Donor-plus-Pooled-Tail-Ref	chr9	73931058	73931058	G	C	Unc13c	c.2510C>G	p.Ala837Gly	missense_variant	MODERATE	311	0	0.003614	93	37	0.379	6.27815
Aplan-10-3617-BM_vs_Aplan-10th-Exp-NHD13-Donor-plus-Pooled-Tail-Ref	chr9	86755241	86755241	G	C	Prss35	c.63G>C	p.Ser21Ser	synonymous_variant	LOW	261	0	0.004611	69	28	0.397	6.70725
Aplan-10-3617-BM_vs_Aplan-10th-Exp-NHD13-Donor-plus-Pooled-Tail-Ref	chr9	101101857	101101857	C	G	Msl2	c.1429C>G	p.Arg477Gly	missense_variant	MODERATE	234	0	0.004833	62	21	0.333	6.54056
Aplan-10-3617-BM_vs_Aplan-10th-Exp-NHD13-Donor-plus-Pooled-Tail-Ref	chr9	108509781	108509781	C	G	Qars	c.516+276C>G		intron_variant	MODIFIER	270	0	0.004437	90	31	0.355	6.78751
Aplan-10-3617-BM_vs_Aplan-10th-Exp-NHD13-Donor-plus-Pooled-Tail-Ref	chr9	109148233	109148233	G	C	Fbxw21	c.412-5C>G		splice_region_variant&intron_variant	LOW	303	0	0.003797	68	23	0.344	6.48822
Aplan-10-3617-BM_vs_Aplan-10th-Exp-NHD13-Donor-plus-Pooled-Tail-Ref	chr9	119610058	119610058	C	G	Scn10a	c.4744G>C	p.Gly1582Arg	missense_variant	MODERATE	172	0	0.006519	42	10	0.27	7.48393
Aplan-10-3617-BM_vs_Aplan-10th-Exp-NHD13-Donor-plus-Pooled-Tail-Ref	chr9	121977548	121977548	C	T	Fam198a	c.1346C>T	p.Ser449Phe	missense_variant	MODERATE	223	0	0.00598	59	24	0.389	6.36802
Aplan-10-3617-BM_vs_Aplan-10th-Exp-NHD13-Donor-plus-Pooled-Tail-Ref	chr10	51481191	51481191	C	G	Lilr4b	c.122C>G	p.Ala41Gly	missense_variant	MODERATE	344	0	0.003415	108	37	0.349	6.65979
Aplan-10-3617-BM_vs_Aplan-10th-Exp-NHD13-Donor-plus-Pooled-Tail-Ref	chr10	56388786	56388786	C	G	Gja1	c.*91C>G		3_prime_UTR_variant	MODIFIER	161	0	0.00728	35	12	0.382	6.29149
Aplan-10-3617-BM_vs_Aplan-10th-Exp-NHD13-Donor-plus-Pooled-Tail-Ref	chr10	62880007	62880007	C	G	Tet1	c.8G>C	p.Arg3Pro	missense_variant	MODERATE	162	0	0.006816	33	9	0.333	7.38296
Aplan-10-3617-BM_vs_Aplan-10th-Exp-NHD13-Donor-plus-Pooled-Tail-Ref	chr10	128777188	128777188	C	G	Pym1-Mmp19	n.128777188C>G		intergenic_region	MODIFIER	180	0	0.006974	35	15	0.419	6.3866
Aplan-10-3617-BM_vs_Aplan-10th-Exp-NHD13-Donor-plus-Pooled-Tail-Ref	chr10	129767661	129767661	C	G	Olfr808	c.164C>G	p.Thr55Ser	missense_variant	MODERATE	433	0	0.002743	131	51	0.376	5.73331
Aplan-10-3617-BM_vs_Aplan-10th-Exp-NHD13-Donor-plus-Pooled-Tail-Ref	chr11	4140450	4140450	C	G	Mir3060	n.*1004C>G		downstream_gene_variant	MODIFIER	193	0	0.005945	31	9	0.31	6.33349
Aplan-10-3617-BM_vs_Aplan-10th-Exp-NHD13-Donor-plus-Pooled-Tail-Ref	chr11	43222209	43222209	C	G	Atp10b	c.2581C>G	p.Leu861Val	missense_variant	MODERATE	108	1	0.011	38	15	0.38	7.17857
Aplan-10-3617-BM_vs_Aplan-10th-Exp-NHD13-Donor-plus-Pooled-Tail-Ref	chr11	52022750	52022750	C	G	Cdkl3	c.665C>G	p.Pro222Arg	missense_variant	MODERATE	221	0	0.005429	68	18	0.237	6.14984
Aplan-10-3617-BM_vs_Aplan-10th-Exp-NHD13-Donor-plus-Pooled-Tail-Ref	chr11	100893711	100893711	G	C	Stat3	c.1842C>G	p.Ser614Arg	missense_variant	MODERATE	228	0	0.005079	51	24	0.489	6.32262
Aplan-10-3617-BM_vs_Aplan-10th-Exp-NHD13-Donor-plus-Pooled-Tail-Ref	chr12	16681337	16681337	G	C	Greb1	c.4999C>G	p.Arg1667Gly	missense_variant	MODERATE	122	0	0.01	47	17	0.375	7.20311
Aplan-10-3617-BM_vs_Aplan-10th-Exp-NHD13-Donor-plus-Pooled-Tail-Ref	chr12	38854215	38854215	G	C	Etv1	c.927G>C	p.Pro309Pro	synonymous_variant	LOW	322	0	0.00384	87	29	0.343	6.09935
Aplan-10-3617-BM_vs_Aplan-10th-Exp-NHD13-Donor-plus-Pooled-Tail-Ref	chr12	79073503	79073503	G	C	Plekhh1	c.3114G>C	p.Thr1038Thr	synonymous_variant	LOW	217	0	0.006031	37	15	0.382	6.86974
Aplan-10-3617-BM_vs_Aplan-10th-Exp-NHD13-Donor-plus-Pooled-Tail-Ref	chr12	86882948	86882948	G	C	Irf2bpl	c.950C>G	p.Thr317Arg	missense_variant	MODERATE	58	0	0.02	18	9	0.5	6.4669
Aplan-10-3617-BM_vs_Aplan-10th-Exp-NHD13-Donor-plus-Pooled-Tail-Ref	chr12	100500147	100500147	G	C	Ttc7b	c.205C>G	p.Arg69Gly	missense_variant	MODERATE	172	0	0.007613	18	9	0.437	6.18825
Aplan-10-3617-BM_vs_Aplan-10th-Exp-NHD13-Donor-plus-Pooled-Tail-Ref	chr13	15648708	15648708	G	C	Gli3	c.1014G>C	p.Ser338Ser	synonymous_variant	LOW	372	0	0.003381	60	23	0.346	6.09748
Aplan-10-3617-BM_vs_Aplan-10th-Exp-NHD13-Donor-plus-Pooled-Tail-Ref	chr13	55783916	55783916	G	C	Catsper3	c.-746G>C		upstream_gene_variant	MODIFIER	79	0	0.014	22	9	0.35	6.62307
Aplan-10-3617-BM_vs_Aplan-10th-Exp-NHD13-Donor-plus-Pooled-Tail-Ref	chr13	92038320	92038320	C	G	Rasgrf2-Msh3	n.92038320C>G		intergenic_region	MODIFIER	253	0	0.004944	64	23	0.36	6.94925
Aplan-10-3617-BM_vs_Aplan-10th-Exp-NHD13-Donor-plus-Pooled-Tail-Ref	chr14	34594831	34594831	C	G	Opn4	c.1000G>C	p.Val334Leu	missense_variant	MODERATE	181	0	0.007118	30	9	0.333	6.25279
Aplan-10-3617-BM_vs_Aplan-10th-Exp-NHD13-Donor-plus-Pooled-Tail-Ref	chr14	77826388	77826388	C	G	Dnajc15	c.*9G>C		3_prime_UTR_variant	MODIFIER	212	0	0.006047	55	15	0.285	6.2497
Aplan-10-3617-BM_vs_Aplan-10th-Exp-NHD13-Donor-plus-Pooled-Tail-Ref	chr15	10515114	10515114	C	G	Ttc23l	c.1177G>C	p.Gly393Arg	missense_variant	MODERATE	155	0	0.008421	38	15	0.424	6.69039
Aplan-10-3617-BM_vs_Aplan-10th-Exp-NHD13-Donor-plus-Pooled-Tail-Ref	chr15	82853132	82853132	G	C	Tcf20	c.4117C>G	p.Arg1373Gly	missense_variant	MODERATE	263	0	0.004522	83	31	0.39	6.29636
Aplan-10-3617-BM_vs_Aplan-10th-Exp-NHD13-Donor-plus-Pooled-Tail-Ref	chr15	92271239	92271239	C	G	Cntn1	c.1695C>G	p.Asp565Glu	missense_variant	MODERATE	159	0	0.007381	32	10	0.3	6.49096
Aplan-10-3617-BM_vs_Aplan-10th-Exp-NHD13-Donor-plus-Pooled-Tail-Ref	chr15	92769580	92769580	C	G	Pdzrn4	c.1612C>G	p.Arg538Gly	missense_variant	MODERATE	124	0	0.009091	42	19	0.46	6.64106
Aplan-10-3617-BM_vs_Aplan-10th-Exp-NHD13-Donor-plus-Pooled-Tail-Ref	chr15	101015995	101015995	C	T	Scn8a	c.3267C>T	p.Asn1089Asn	synonymous_variant	LOW	149	0	0.008098	49	19	0.375	6.64632
Aplan-10-3617-BM_vs_Aplan-10th-Exp-NHD13-Donor-plus-Pooled-Tail-Ref	chr16	9992468	9992468	C	G	Grin2a	c.66G>C	p.Ala22Ala	synonymous_variant	LOW	182	0	0.006421	22	7	0.348	7.18795
Aplan-10-3617-BM_vs_Aplan-10th-Exp-NHD13-Donor-plus-Pooled-Tail-Ref	chr16	34986526	34986526	G	C	Mylk	c.5140G>C	p.Glu1714Gln	missense_variant	MODERATE	106	0	0.012	18	6	0.353	5.3812
Aplan-10-3617-BM_vs_Aplan-10th-Exp-NHD13-Donor-plus-Pooled-Tail-Ref	chr16	38601819	38601819	C	G	Arhgap31	c.3884G>C	p.Arg1295Pro	missense_variant	MODERATE	270	0	0.004307	75	22	0.289	6.81085
Aplan-10-3617-BM_vs_Aplan-10th-Exp-NHD13-Donor-plus-Pooled-Tail-Ref	chr16	56773496	56773496	C	G	Adgrg7	c.356G>C	p.Arg119Pro	missense_variant	MODERATE	224	0	0.005581	75	28	0.359	6.23589
Aplan-10-3617-BM_vs_Aplan-10th-Exp-NHD13-Donor-plus-Pooled-Tail-Ref	chr16	64478541	64478541	C	G	Csnka2ip	c.127G>C	p.Ala43Pro	missense_variant	MODERATE	196	0	0.005811	69	26	0.391	6.84565
Aplan-10-3617-BM_vs_Aplan-10th-Exp-NHD13-Donor-plus-Pooled-Tail-Ref	chr16	66812861	66812861	G	C	Cadm2	c.398C>G	p.Pro133Arg	missense_variant	MODERATE	122	0	0.009959	56	15	0.302	6.51636
Aplan-10-3617-BM_vs_Aplan-10th-Exp-NHD13-Donor-plus-Pooled-Tail-Ref	chr17	13888963	13888963	G	C	Mllt4	c.4792G>C	p.Glu1598Gln	missense_variant	MODERATE	137	0	0.008427	43	11	0.263	7.31166
Aplan-10-3617-BM_vs_Aplan-10th-Exp-NHD13-Donor-plus-Pooled-Tail-Ref	chr17	17843992	17843992	G	C	Has1	c.1384C>G	p.Arg462Gly	missense_variant	MODERATE	152	0	0.007123	47	17	0.353	6.91254
Aplan-10-3617-BM_vs_Aplan-10th-Exp-NHD13-Donor-plus-Pooled-Tail-Ref	chr17	25947735	25947735	G	C	Nhlrc4	c.-3964C>G		upstream_gene_variant	MODIFIER	207	1	0.005665	61	32	0.51	6.29681
Aplan-10-3617-BM_vs_Aplan-10th-Exp-NHD13-Donor-plus-Pooled-Tail-Ref	chr17	27151229	27151229	G	C	Ip6k3	c.214C>G	p.Arg72Gly	missense_variant	MODERATE	123	0	0.00885	16	6	0.375	6.04974
Aplan-10-3617-BM_vs_Aplan-10th-Exp-NHD13-Donor-plus-Pooled-Tail-Ref	chr17	28532312	28532312	C	G	Armc12	c.310-31C>G		intron_variant	MODIFIER	155	0	0.00739	48	27	0.571	6.52187
Aplan-10-3617-BM_vs_Aplan-10th-Exp-NHD13-Donor-plus-Pooled-Tail-Ref	chr17	47469222	47469222	C	G	AI661453	c.3504-54C>G		intron_variant	MODIFIER	138	0	0.007972	34	12	0.368	7.37313
Aplan-10-3617-BM_vs_Aplan-10th-Exp-NHD13-Donor-plus-Pooled-Tail-Ref	chr17	49901761	49901761	C	G	Kif6	c.2208C>G	p.Cys736Trp	missense_variant&splice_region_variant	MODERATE	158	0	0.007721	47	20	0.41	6.64207
Aplan-10-3617-BM_vs_Aplan-10th-Exp-NHD13-Donor-plus-Pooled-Tail-Ref	chr18	23602596	23602596	C	G	Dtna	c.1007C>G	p.Pro336Arg	missense_variant	MODERATE	445	0	0.002874	63	23	0.377	6.6668
Aplan-10-3617-BM_vs_Aplan-10th-Exp-NHD13-Donor-plus-Pooled-Tail-Ref	chr18	25504165	25504165	C	G	Celf4	c.772G>C	p.Gly258Arg	missense_variant	MODERATE	118	0	0.009008	24	11	0.5	7.53242
Aplan-10-3617-BM_vs_Aplan-10th-Exp-NHD13-Donor-plus-Pooled-Tail-Ref	chr18	37520117	37520117	G	C	Pcdhb22	c.1637G>C	p.Arg546Pro	missense_variant	MODERATE	579	0	0.002011	147	55	0.356	6.27468
Aplan-10-3617-BM_vs_Aplan-10th-Exp-NHD13-Donor-plus-Pooled-Tail-Ref	chr18	37691571	37691571	G	C	Pcdhgb2	c.1614G>C	p.Ser538Ser	synonymous_variant	LOW	251	0	0.004233	102	41	0.383	5.89123
Aplan-10-3617-BM_vs_Aplan-10th-Exp-NHD13-Donor-plus-Pooled-Tail-Ref	chr18	53984507	53984507	G	A	Csnk1g3-Redrum	n.53984507G>A		intergenic_region	MODIFIER	516	3	0.00678	149	67	0.447	5.92863
Aplan-10-3617-BM_vs_Aplan-10th-Exp-NHD13-Donor-plus-Pooled-Tail-Ref	chr18	54899585	54899585	G	C	Zfp608	c.1282C>G	p.Arg428Gly	missense_variant	MODERATE	170	0	0.007031	23	7	0.308	6.85923
Aplan-10-3617-BM_vs_Aplan-10th-Exp-NHD13-Donor-plus-Pooled-Tail-Ref	chr18	71367164	71367164	C	G	Dcc	c.3011G>C	p.Arg1004Pro	missense_variant	MODERATE	183	0	0.006666	54	15	0.292	7.02821
Aplan-10-3617-BM_vs_Aplan-10th-Exp-NHD13-Donor-plus-Pooled-Tail-Ref	chr19	9984763	9984763	C	G	Best1	c.*623G>C		downstream_gene_variant	MODIFIER	299	0	0.003888	91	31	0.348	6.45203
Aplan-10-3617-BM_vs_Aplan-10th-Exp-NHD13-Donor-plus-Pooled-Tail-Ref	chr19	18854122	18854122	G	C	Trpm6	c.4350G>C	p.Ser1450Ser	synonymous_variant	LOW	311	0	0.003773	61	26	0.463	6.20286
Aplan-10-3617-BM_vs_Aplan-10th-Exp-NHD13-Donor-plus-Pooled-Tail-Ref	chr19	57755632	57755632	C	T	Atrnl1	c.3651+14C>T		intron_variant	MODIFIER	348	0	0.003608	105	39	0.375	6.33364
Aplan-10-3617-BM_vs_Aplan-10th-Exp-NHD13-Donor-plus-Pooled-Tail-Ref	chrX	20108745	20108745	G	C	Slc9a7	c.1859C>G	p.Pro620Arg	missense_variant	MODERATE	181	0	0.007628	33	24	0.714	6.70242
Aplan-10-3617-BM_vs_Aplan-10th-Exp-NHD13-Donor-plus-Pooled-Tail-Ref	chrX	133931435	133931435	G	C	Srpx2	c.1376G>C	p.Arg459Pro	missense_variant	MODERATE	156	0	0.007492	29	19	0.667	6.24347
Aplan-10-3617-BM_vs_Aplan-10th-Exp-NHD13-Donor-plus-Pooled-Tail-Ref	chrX	147747015	147747015	C	G	Lrch2-Gm15080	n.147747015C>G		intergenic_region	MODIFIER	830	1	0.001511	115	95	0.815	6.3895
Aplan-10-3617-BM_vs_Aplan-10th-Exp-NHD13-Donor-plus-Pooled-Tail-Ref	chrX	161187306	161187306	G	C	Scml2	c.371G>C	p.Arg124Pro	missense_variant	MODERATE	258	0	0.004876	49	40	0.795	6.51163
Aplan-10-3619-Thy_vs_Aplan-Pooled-Tail-Ref	chr1	9968889	9968889	G	GT	Ppp1r42	c.1004dupA	p.Asn335fs	frameshift_variant	HIGH	251	0	0.004968	120	58	0.506	5.93264
Aplan-10-3619-Thy_vs_Aplan-Pooled-Tail-Ref	chr1	36348919	36348919	G	C	Kansl3	c.1483C>G	p.Arg495Gly	missense_variant	MODERATE	274	0	0.004454	37	18	0.484	6.5604
Aplan-10-3619-Thy_vs_Aplan-Pooled-Tail-Ref	chr1	36553246	36553246	C	G	Sema4c	c.612G>C	p.Glu204Asp	missense_variant	MODERATE	116	0	0.01	35	5	0.2	3.27526
Aplan-10-3619-Thy_vs_Aplan-Pooled-Tail-Ref	chr1	74362838	74362838	G	C	Catip	c.114G>C	p.Val38Val	synonymous_variant	LOW	138	0	0.008604	25	15	0.545	6.95344
Aplan-10-3619-Thy_vs_Aplan-Pooled-Tail-Ref	chr1	80200314	80200314	G	C	Fam124b	c.967C>G	p.Leu323Val	missense_variant	MODERATE	241	0	0.004961	34	8	0.233	7.60549
Aplan-10-3619-Thy_vs_Aplan-Pooled-Tail-Ref	chr1	89137732	89137732	G	C	Sh3bp4	c.47G>C	p.Arg16Pro	missense_variant	MODERATE	102	0	0.012	26	11	0.429	6.64623
Aplan-10-3619-Thy_vs_Aplan-Pooled-Tail-Ref	chr1	92876995	92876995	C	T	Ankmy1	c.2559+16G>A		intron_variant	MODIFIER	96	0	0.012	32	13	0.462	6.98285
Aplan-10-3619-Thy_vs_Aplan-Pooled-Tail-Ref	chr1	93046704	93046704	G	C	Kif1a	c.2622C>G	p.Ser874Arg	missense_variant	MODERATE	98	0	0.013	24	13	0.5	6.95681
Aplan-10-3619-Thy_vs_Aplan-Pooled-Tail-Ref	chr1	93874591	93874591	G	C	Gal3st2	c.693G>C	p.Glu231Asp	missense_variant	MODERATE	143	0	0.008664	57	22	0.425	6.20408
Aplan-10-3619-Thy_vs_Aplan-Pooled-Tail-Ref	chr1	127954987	127954987	G	C	Zranb3	c.3202C>G	p.Arg1068Gly	missense_variant	MODERATE	496	0	0.002634	80	31	0.393	6.5944
Aplan-10-3619-Thy_vs_Aplan-Pooled-Tail-Ref	chr1	128216434	128216434	C	G	R3hdm1	c.2338C>G	p.His780Asp	missense_variant	MODERATE	159	0	0.0077	62	22	0.369	6.25151
Aplan-10-3619-Thy_vs_Aplan-Pooled-Tail-Ref	chr1	131129501	131129501	G	C	Dyrk3	c.934C>G	p.Arg312Gly	missense_variant	MODERATE	111	0	0.009512	31	16	0.462	7.05905
Aplan-10-3619-Thy_vs_Aplan-Pooled-Tail-Ref	chr1	131158198	131158198	C	G	Eif2d	c.429C>G	p.Pro143Pro	synonymous_variant	LOW	129	0	0.009895	31	15	0.458	6.9432
Aplan-10-3619-Thy_vs_Aplan-Pooled-Tail-Ref	chr1	132516503	132516503	G	C	Cntn2	c.2850+21C>G		intron_variant	MODIFIER	94	0	0.014	40	24	0.636	6.30604
Aplan-10-3619-Thy_vs_Aplan-Pooled-Tail-Ref	chr1	156666712	156666712	G	C	Tor3a	c.669C>G	p.Asp223Glu	missense_variant	MODERATE	19	0	0.059	5	5	0.833	4.62843
Aplan-10-3619-Thy_vs_Aplan-Pooled-Tail-Ref	chr1	161972411	161972411	G	C	Pigc	c.*1067G>C		3_prime_UTR_variant	MODIFIER	185	0	0.006238	60	26	0.442	6.43965
Aplan-10-3619-Thy_vs_Aplan-Pooled-Tail-Ref	chr1	172232082	172232082	G	C	Atp1a4	c.2476-34C>G		intron_variant	MODIFIER	120	0	0.009842	32	19	0.572	6.88404
Aplan-10-3619-Thy_vs_Aplan-Pooled-Tail-Ref	chr1	174185639	174185639	G	C	Spta1	c.1115G>C	p.Arg372Pro	missense_variant	MODERATE	220	0	0.006182	93	51	0.537	5.89768
Aplan-10-3619-Thy_vs_Aplan-Pooled-Tail-Ref	chr2	9874432	9874432	G	C	Gata3	c.732C>G	p.Thr244Thr	synonymous_variant	LOW	97	0	0.012	22	10	0.546	6.33765
Aplan-10-3619-Thy_vs_Aplan-Pooled-Tail-Ref	chr2	9874648	9874648	G	C	Gata3	c.516C>G	p.Ala172Ala	synonymous_variant	LOW	224	0	0.005523	21	14	0.644	7.21088
Aplan-10-3619-Thy_vs_Aplan-Pooled-Tail-Ref	chr2	9874698	9874698	G	C	Gata3	c.466C>G	p.Pro156Ala	missense_variant	MODERATE	213	0	0.005556	15	11	0.714	6.49188
Aplan-10-3619-Thy_vs_Aplan-Pooled-Tail-Ref	chr2	10164699	10164699	C	G	Itih5	c.106C>G	p.Pro36Ala	missense_variant	MODERATE	350	0	0.003698	62	26	0.447	6.70583
Aplan-10-3619-Thy_vs_Aplan-Pooled-Tail-Ref	chr2	24435903	24435903	G	A	Pax8	c.968C>T	p.Ser323Phe	missense_variant	MODERATE	66	0	0.018	17	7	0.375	5.32937
Aplan-10-3619-Thy_vs_Aplan-Pooled-Tail-Ref	chr2	25460821	25460821	C	G	BC029214	c.91G>C	p.Gly31Arg	missense_variant	MODERATE	184	1	0.006419	27	15	0.515	7.26211
Aplan-10-3619-Thy_vs_Aplan-Pooled-Tail-Ref	chr2	26591424	26591424	C	G	Mir126b	n.-4G>C		upstream_gene_variant	MODIFIER	69	0	0.016	20	8	0.412	5.74869
Aplan-10-3619-Thy_vs_Aplan-Pooled-Tail-Ref	chr2	28848333	28848333	C	G	Ddx31	c.505C>G	p.Leu169Val	missense_variant	MODERATE	243	0	0.00534	78	31	0.4	6.23981
Aplan-10-3619-Thy_vs_Aplan-Pooled-Tail-Ref	chr2	29980241	29980241	C	G	Sptan1	c.363+39C>G		intron_variant	MODIFIER	61	0	0.018	33	16	0.464	6.85263
Aplan-10-3619-Thy_vs_Aplan-Pooled-Tail-Ref	chr2	31918498	31918498	C	G	Lamc3	c.2265C>G	p.Asn755Lys	missense_variant	MODERATE	91	0	0.012	25	12	0.4	7.22381
Aplan-10-3619-Thy_vs_Aplan-Pooled-Tail-Ref	chr2	32038101	32038101	G	C	Nup214	c.5510-1G>C		splice_acceptor_variant&intron_variant	HIGH	169	0	0.007622	85	27	0.321	6.11469
Aplan-10-3619-Thy_vs_Aplan-Pooled-Tail-Ref	chr2	32919788	32919788	C	G	Fam129b	c.896C>G	p.Pro299Arg	missense_variant	MODERATE	108	0	0.011	23	12	0.546	6.67161
Aplan-10-3619-Thy_vs_Aplan-Pooled-Tail-Ref	chr2	32922898	32922898	C	G	Fam129b	c.1477C>G	p.Arg493Gly	missense_variant	MODERATE	221	0	0.005724	44	27	0.569	6.06676
Aplan-10-3619-Thy_vs_Aplan-Pooled-Tail-Ref	chr2	35304303	35304303	G	C	Gsn	c.1949G>C	p.Arg650Pro	missense_variant	MODERATE	98	0	0.012	25	13	0.527	6.75277
Aplan-10-3619-Thy_vs_Aplan-Pooled-Tail-Ref	chr2	35720037	35720037	C	G	Dab2ip	c.2263C>G	p.Arg755Gly	missense_variant	MODERATE	85	0	0.013	33	15	0.483	6.23272
Aplan-10-3619-Thy_vs_Aplan-Pooled-Tail-Ref	chr2	69712325	69712325	G	C	Fastkd1	c.137C>G	p.Thr46Arg	missense_variant	MODERATE	132	0	0.009036	48	20	0.41	6.7825
Aplan-10-3619-Thy_vs_Aplan-Pooled-Tail-Ref	chr2	71515831	71515831	C	G	Mir5098	n.24+101124C>G		intron_variant	MODIFIER	60	0	0.017	22	9	0.455	5.77022
Aplan-10-3619-Thy_vs_Aplan-Pooled-Tail-Ref	chr2	76781106	76781106	G	C	Ttn	c.46843C>G	p.Arg15615Gly	missense_variant	MODERATE	184	0	0.006518	65	22	0.372	6.7254
Aplan-10-3619-Thy_vs_Aplan-Pooled-Tail-Ref	chr2	91154740	91154740	G	C	Madd	c.3888C>G	p.Asp1296Glu	missense_variant	MODERATE	160	0	0.007362	41	15	0.389	6.45687
Aplan-10-3619-Thy_vs_Aplan-Pooled-Tail-Ref	chr2	118693747	118693747	G	C	Pak6	c.1359+23G>C		intron_variant	MODIFIER	112	0	0.009517	17	9	0.428	6.87273
Aplan-10-3619-Thy_vs_Aplan-Pooled-Tail-Ref	chr2	119071859	119071859	C	T	Casc5	c.4040C>T	p.Ser1347Leu	missense_variant	MODERATE	158	0	0.007194	74	35	0.476	6.24714
Aplan-10-3619-Thy_vs_Aplan-Pooled-Tail-Ref	chr2	122065162	122065162	G	C	Spg11	c.5574C>G	p.His1858Gln	missense_variant	MODERATE	119	0	0.009993	59	25	0.42	6.55816
Aplan-10-3619-Thy_vs_Aplan-Pooled-Tail-Ref	chr2	126758429	126758429	C	G	Usp8	c.3099C>G	p.Tyr1033*	stop_gained	HIGH	127	0	0.008798	31	11	0.357	6.67223
Aplan-10-3619-Thy_vs_Aplan-Pooled-Tail-Ref	chr2	128147078	128147078	C	G	Bcl2l11	c.383-7C>G		splice_region_variant&intron_variant	LOW	47	0	0.024	21	12	0.571	7.39401
Aplan-10-3619-Thy_vs_Aplan-Pooled-Tail-Ref	chr2	152917615	152917615	C	G	Mylk2	c.1224C>G	p.Cys408Trp	missense_variant	MODERATE	137	0	0.008722	18	8	0.5	6.19357
Aplan-10-3619-Thy_vs_Aplan-Pooled-Tail-Ref	chr2	164887124	164887124	G	C	Pcif1	c.968G>C	p.Arg323Pro	missense_variant	MODERATE	112	0	0.012	32	15	0.565	6.20129
Aplan-10-3619-Thy_vs_Aplan-Pooled-Tail-Ref	chr2	168756166	168756166	C	G	Sall4	c.753G>C	p.Thr251Thr	synonymous_variant	LOW	147	0	0.007386	29	15	0.504	6.47123
Aplan-10-3619-Thy_vs_Aplan-Pooled-Tail-Ref	chr2	173158523	173158523	G	C	Pck1	c.1746G>C	p.Lys582Asn	missense_variant	MODERATE	97	0	0.012	13	6	0.491	6.09627
Aplan-10-3619-Thy_vs_Aplan-Pooled-Tail-Ref	chr2	173522740	173522740	C	G	1700021F07Rik	c.68+9C>G		intron_variant	MODIFIER	63	1	0.02	22	8	0.412	4.29984
Aplan-10-3619-Thy_vs_Aplan-Pooled-Tail-Ref	chr2	180279535	180279535	C	T	Rbbp8nl	c.1055G>A	p.Arg352Gln	missense_variant	MODERATE	39	0	0.024	7	5	0.625	4.81474
Aplan-10-3619-Thy_vs_Aplan-Pooled-Tail-Ref	chr3	36461872	36461872	C	T	Anxa5	c.297+9G>A		intron_variant	MODIFIER	120	0	0.011	35	8	0.233	5.46565
Aplan-10-3619-Thy_vs_Aplan-Pooled-Tail-Ref	chr3	59179164	59179164	C	G	Gpr87	c.919G>C	p.Val307Leu	missense_variant	MODERATE	111	0	0.009725	73	27	0.393	6.30888
Aplan-10-3619-Thy_vs_Aplan-Pooled-Tail-Ref	chr3	83014209	83014209	C	G	Fgg	c.1198C>G	p.Arg400Gly	missense_variant	MODERATE	68	0	0.018	40	22	0.549	6.84803
Aplan-10-3619-Thy_vs_Aplan-Pooled-Tail-Ref	chr3	86799512	86799512	G	A	Dclk2	c.1691C>T	p.Thr564Met	missense_variant	MODERATE	79	0	0.015	35	21	0.615	6.77716
Aplan-10-3619-Thy_vs_Aplan-Pooled-Tail-Ref	chr3	87084989	87084989	G	A	Kirrel	c.1676-45C>T		intron_variant	MODIFIER	112	0	0.009549	28	13	0.464	6.71939
Aplan-10-3619-Thy_vs_Aplan-Pooled-Tail-Ref	chr3	88642590	88642590	C	G	Arhgef2	c.1951C>G	p.Arg651Gly	missense_variant	MODERATE	169	0	0.007108	15	9	0.668	6.77141
Aplan-10-3619-Thy_vs_Aplan-Pooled-Tail-Ref	chr3	89890255	89890255	C	G	Il6ra	c.304G>C	p.Val102Leu	missense_variant	MODERATE	186	0	0.006706	36	14	0.469	6.90991
Aplan-10-3619-Thy_vs_Aplan-Pooled-Tail-Ref	chr3	94387469	94387469	C	G	Rorc	c.166C>G	p.Arg56Gly	missense_variant	MODERATE	59	0	0.018	11	6	0.5	5.45301
Aplan-10-3619-Thy_vs_Aplan-Pooled-Tail-Ref	chr3	94387541	94387541	C	G	Rorc	c.238C>G	p.Arg80Gly	missense_variant	MODERATE	72	0	0.017	10	6	0.557	6.22205
Aplan-10-3619-Thy_vs_Aplan-Pooled-Tail-Ref	chr3	97411149	97411149	G	T	Olfr1402	c.31C>A	p.Arg11Ser	missense_variant	MODERATE	100	0	0.013	49	23	0.475	6.89723
Aplan-10-3619-Thy_vs_Aplan-Pooled-Tail-Ref	chr3	106210570	106210570	C	G	Chil4	c.383G>C	p.Arg128Pro	missense_variant	MODERATE	446	0	0.002799	282	62	0.228	5.71208
Aplan-10-3619-Thy_vs_Aplan-Pooled-Tail-Ref	chr3	108385020	108385020	G	C	Psrc1	c.128G>C	p.Arg43Pro	missense_variant	MODERATE	71	0	0.015	12	7	0.546	6.71952
Aplan-10-3619-Thy_vs_Aplan-Pooled-Tail-Ref	chr3	127796890	127796890	C	G	Tifa	c.309C>G	p.Leu103Leu	synonymous_variant	LOW	175	1	0.006296	78	34	0.448	5.82049
Aplan-10-3619-Thy_vs_Aplan-Pooled-Tail-Ref	chr3	152384223	152384223	G	C	Usp33	c.2399G>C	p.Arg800Pro	missense_variant&splice_region_variant	MODERATE	47	0	0.022	17	8	0.5	5.26024
Aplan-10-3619-Thy_vs_Aplan-Pooled-Tail-Ref	chr4	11379328	11379328	G	C	Esrp1	c.453C>G	p.Pro151Pro	synonymous_variant	LOW	112	0	0.012	46	23	0.528	6.81784
Aplan-10-3619-Thy_vs_Aplan-Pooled-Tail-Ref	chr4	33085593	33085593	G	C	Gabrr2	c.1012G>C	p.Ala338Pro	missense_variant	MODERATE	93	0	0.013	24	12	0.536	7.51368
Aplan-10-3619-Thy_vs_Aplan-Pooled-Tail-Ref	chr4	43543209	43543209	G	C	Tln1	c.3954C>G	p.Ala1318Ala	synonymous_variant	LOW	119	0	0.009562	28	12	0.478	6.15073
Aplan-10-3619-Thy_vs_Aplan-Pooled-Tail-Ref	chr4	45243683	45243683	C	G	Frmpd1	c.155C>G	p.Thr52Arg	missense_variant	MODERATE	102	0	0.012	48	15	0.343	6.50908
Aplan-10-3619-Thy_vs_Aplan-Pooled-Tail-Ref	chr4	88571632	88571632	C	G	Ifna14	c.167G>C	p.Arg56Pro	missense_variant	MODERATE	370	0	0.003075	139	75	0.54	6.02548
Aplan-10-3619-Thy_vs_Aplan-Pooled-Tail-Ref	chr4	88804078	88804078	G	A	Gm13288	c.-2108G>A		upstream_gene_variant	MODIFIER	356	0	0.003308	160	60	0.361	6.03036
Aplan-10-3619-Thy_vs_Aplan-Pooled-Tail-Ref	chr4	120883144	120883144	G	A	Rims3	c.287G>A	p.Arg96Gln	missense_variant	MODERATE	65	0	0.019	34	10	0.322	5.07485
Aplan-10-3619-Thy_vs_Aplan-Pooled-Tail-Ref	chr4	123208488	123208488	C	G	Nt5c1a	c.206C>G	p.Thr69Arg	missense_variant	MODERATE	72	0	0.016	16	6	0.4	4.83042
Aplan-10-3619-Thy_vs_Aplan-Pooled-Tail-Ref	chr4	126734577	126734577	G	C	Tfap2e	c.562+23C>G		intron_variant	MODIFIER	137	0	0.009486	27	14	0.562	7.06898
Aplan-10-3619-Thy_vs_Aplan-Pooled-Tail-Ref	chr4	128473931	128473931	C	G	Csmd2	c.5312C>G	p.Ala1771Gly	missense_variant&splice_region_variant	MODERATE	36	0	0.03	12	6	0.546	4.12323
Aplan-10-3619-Thy_vs_Aplan-Pooled-Tail-Ref	chr4	128751609	128751609	C	G	Phc2	c.2508C>G	p.Pro836Pro	synonymous_variant	LOW	117	0	0.01	25	10	0.435	6.43797
Aplan-10-3619-Thy_vs_Aplan-Pooled-Tail-Ref	chr4	132728367	132728367	G	C	Xkr8	c.694C>G	p.His232Asp	missense_variant	MODERATE	70	0	0.016	23	11	0.454	7.65406
Aplan-10-3619-Thy_vs_Aplan-Pooled-Tail-Ref	chr4	133415354	133415354	G	C	Slc9a1	c.879G>C	p.Ser293Ser	synonymous_variant	LOW	129	0	0.009261	35	21	0.539	6.9293
Aplan-10-3619-Thy_vs_Aplan-Pooled-Tail-Ref	chr4	141920901	141920901	C	G	Fhad1	c.2648G>C	p.Arg883Pro	missense_variant	MODERATE	159	0	0.007422	46	21	0.45	6.32592
Aplan-10-3619-Thy_vs_Aplan-Pooled-Tail-Ref	chr4	149653456	149653456	G	C	Pik3cd	c.2458C>G	p.Pro820Ala	missense_variant	MODERATE	90	0	0.014	23	12	0.591	6.02131
Aplan-10-3619-Thy_vs_Aplan-Pooled-Tail-Ref	chr4	149655452	149655452	C	G	Pik3cd	c.1573G>C	p.Glu525Gln	missense_variant	MODERATE	200	0	0.005908	43	26	0.593	6.00328
Aplan-10-3619-Thy_vs_Aplan-Pooled-Tail-Ref	chr4	154064626	154064626	C	G	Trp73	c.839+12G>C		intron_variant	MODIFIER	97	0	0.011	36	11	0.323	6.79796
Aplan-10-3619-Thy_vs_Aplan-Pooled-Tail-Ref	chr4	155588679	155588679	C	G	Nadk	c.1159C>G	p.Arg387Gly	missense_variant	MODERATE	113	0	0.011	30	12	0.36	7.18112
Aplan-10-3619-Thy_vs_Aplan-Pooled-Tail-Ref	chr4	156222766	156222766	G	A	Plekhn1	c.1326C>T	p.Asn442Asn	synonymous_variant	LOW	111	0	0.01	28	12	0.458	7.44095
Aplan-10-3619-Thy_vs_Aplan-Pooled-Tail-Ref	chr5	3729706	3729706	C	G	Ankib1	c.1162G>C	p.Val388Leu	missense_variant	MODERATE	124	0	0.009825	76	41	0.523	6.38062
Aplan-10-3619-Thy_vs_Aplan-Pooled-Tail-Ref	chr5	30970310	30970310	C	G	Tcf23	c.455C>G	p.Pro152Arg	missense_variant	MODERATE	133	0	0.009152	33	15	0.448	6.75239
Aplan-10-3619-Thy_vs_Aplan-Pooled-Tail-Ref	chr5	31191373	31191373	G	T	Eif2b4	c.553C>A	p.Arg185Arg	synonymous_variant	LOW	200	2	0.018	53	23	0.436	6.0674
Aplan-10-3619-Thy_vs_Aplan-Pooled-Tail-Ref	chr5	32285859	32285859	G	C	Plb1	c.849G>C	p.Ala283Ala	synonymous_variant	LOW	127	0	0.011	50	26	0.513	6.52891
Aplan-10-3619-Thy_vs_Aplan-Pooled-Tail-Ref	chr5	65393921	65393921	C	G	Rpl9	c.-2930G>C		upstream_gene_variant	MODIFIER	108	0	0.011	43	19	0.455	7.04913
Aplan-10-3619-Thy_vs_Aplan-Pooled-Tail-Ref	chr5	65422687	65422687	C	G	Ugdh	c.759G>C	p.Thr253Thr	synonymous_variant	LOW	114	0	0.011	49	15	0.351	6.8827
Aplan-10-3619-Thy_vs_Aplan-Pooled-Tail-Ref	chr5	67398319	67398319	C	G	Bend4	c.1543G>C	p.Gly515Arg	missense_variant	MODERATE	90	0	0.013	35	15	0.448	6.17027
Aplan-10-3619-Thy_vs_Aplan-Pooled-Tail-Ref	chr5	92265031	92265031	C	G	Naaa	c.681+50G>C		intron_variant	MODIFIER	95	1	0.013	33	16	0.533	6.71668
Aplan-10-3619-Thy_vs_Aplan-Pooled-Tail-Ref	chr5	92940810	92940810	C	G	Shroom3	c.1418C>G	p.Pro473Arg	missense_variant	MODERATE	130	0	0.009253	28	10	0.4	6.34103
Aplan-10-3619-Thy_vs_Aplan-Pooled-Tail-Ref	chr5	100485636	100485636	G	C	Lin54	c.188C>G	p.Thr63Arg	missense_variant	MODERATE	255	0	0.004434	96	46	0.482	6.4021
Aplan-10-3619-Thy_vs_Aplan-Pooled-Tail-Ref	chr5	110614177	110614177	G	C	Galnt9	c.1180G>C	p.Ala394Pro	missense_variant	MODERATE	97	0	0.012	34	9	0.333	5.65391
Aplan-10-3619-Thy_vs_Aplan-Pooled-Tail-Ref	chr5	111266563	111266563	G	C	Ttc28	c.3943G>C	p.Glu1315Gln	missense_variant	MODERATE	111	0	0.011	29	10	0.366	7.45697
Aplan-10-3619-Thy_vs_Aplan-Pooled-Tail-Ref	chr5	112471787	112471787	G	C	Sez6l	c.983-5C>G		splice_region_variant&intron_variant	LOW	66	0	0.019	15	6	0.417	4.81186
Aplan-10-3619-Thy_vs_Aplan-Pooled-Tail-Ref	chr5	114014016	114014016	G	C	Dao	c.383+11G>C		intron_variant	MODIFIER	102	0	0.012	28	15	0.577	6.49402
Aplan-10-3619-Thy_vs_Aplan-Pooled-Tail-Ref	chr5	114233282	114233282	G	C	Acacb	c.5471G>C	p.Arg1824Pro	missense_variant	MODERATE	111	1	0.012	27	17	0.601	6.7777
Aplan-10-3619-Thy_vs_Aplan-Pooled-Tail-Ref	chr5	114355152	114355152	C	G	Myo1h	c.2093-40C>G		intron_variant	MODIFIER	46	0	0.026	33	13	0.4	5.6632
Aplan-10-3619-Thy_vs_Aplan-Pooled-Tail-Ref	chr5	115246863	115246863	G	C	Rnf10	c.1867+17C>G		intron_variant	MODIFIER	423	0	0.002961	65	27	0.418	6.13114
Aplan-10-3619-Thy_vs_Aplan-Pooled-Tail-Ref	chr5	115330615	115330615	C	G	Srsf9	c.309C>G	p.Asn103Lys	missense_variant	MODERATE	268	0	0.004783	48	21	0.441	6.39684
Aplan-10-3619-Thy_vs_Aplan-Pooled-Tail-Ref	chr5	117324884	117324884	C	G	Vsig10	c.174C>G	p.His58Gln	missense_variant	MODERATE	127	0	0.009797	33	18	0.556	6.24747
Aplan-10-3619-Thy_vs_Aplan-Pooled-Tail-Ref	chr5	118255766	118255766	C	G	2410131K14Rik	c.208C>G	p.Arg70Gly	missense_variant	MODERATE	68	0	0.017	15	10	0.692	6.85029
Aplan-10-3619-Thy_vs_Aplan-Pooled-Tail-Ref	chr5	120625743	120625743	G	C	Ddx54	c.1956G>C	p.Pro652Pro	synonymous_variant	LOW	81	0	0.015	25	8	0.4	5.44535
Aplan-10-3619-Thy_vs_Aplan-Pooled-Tail-Ref	chr5	120805453	120805453	G	C	Oas1c	c.620C>G	p.Ala207Gly	missense_variant	MODERATE	320	0	0.003742	110	47	0.449	5.94554
Aplan-10-3619-Thy_vs_Aplan-Pooled-Tail-Ref	chr5	124469839	124469839	C	G	Rilpl2	c.317G>C	p.Gly106Ala	missense_variant	MODERATE	193	0	0.006546	31	6	0.2	5.34779
Aplan-10-3619-Thy_vs_Aplan-Pooled-Tail-Ref	chr5	125011345	125011345	G	C	Fam101a	c.355G>C	p.Val119Leu	missense_variant	MODERATE	80	0	0.015	18	10	0.467	6.55154
Aplan-10-3619-Thy_vs_Aplan-Pooled-Tail-Ref	chr5	125032087	125032087	C	G	Ncor2	c.4549G>C	p.Ala1517Pro	missense_variant	MODERATE	91	0	0.014	5	5	0.833	7.78621
Aplan-10-3619-Thy_vs_Aplan-Pooled-Tail-Ref	chr5	134729416	134729416	G	C	Eln	c.402C>G	p.Gly134Gly	synonymous_variant	LOW	111	0	0.01	23	9	0.479	7.55263
Aplan-10-3619-Thy_vs_Aplan-Pooled-Tail-Ref	chr5	135037512	135037512	G	C	Stx1a	c.145G>C	p.Glu49Gln	missense_variant	MODERATE	119	0	0.011	39	18	0.5	6.2289
Aplan-10-3619-Thy_vs_Aplan-Pooled-Tail-Ref	chr5	135249382	135249382	G	C	Fzd9	c.1648C>G	p.Arg550Gly	missense_variant	MODERATE	101	0	0.012	29	15	0.542	6.27386
Aplan-10-3619-Thy_vs_Aplan-Pooled-Tail-Ref	chr5	137113625	137113625	G	C	Trim56	c.1036C>G	p.Arg346Gly	missense_variant	MODERATE	146	1	0.01	18	7	0.389	6.36675
Aplan-10-3619-Thy_vs_Aplan-Pooled-Tail-Ref	chr5	137609083	137609083	G	C	Pcolce	c.268C>G	p.Arg90Gly	missense_variant	MODERATE	41	1	0.029	13	9	0.636	5.90765
Aplan-10-3619-Thy_vs_Aplan-Pooled-Tail-Ref	chr5	139752250	139752250	G	C	Ints1	c.6322C>G	p.Arg2108Gly	missense_variant	MODERATE	79	0	0.015	25	11	0.421	7.69931
Aplan-10-3619-Thy_vs_Aplan-Pooled-Tail-Ref	chr5	139807972	139807972	C	G	Tmem184a	c.542G>C	p.Arg181Pro	missense_variant	MODERATE	110	0	0.011	33	19	0.572	6.2958
Aplan-10-3619-Thy_vs_Aplan-Pooled-Tail-Ref	chr5	140626469	140626469	G	C	Ttyh3	c.1482C>G	p.Arg494Arg	synonymous_variant	LOW	100	0	0.013	23	10	0.471	6.25778
Aplan-10-3619-Thy_vs_Aplan-Pooled-Tail-Ref	chr5	142173715	142173715	C	G	Sdk1	c.5693C>G	p.Ser1898Cys	missense_variant	MODERATE	204	0	0.006514	32	8	0.279	7.30375
Aplan-10-3619-Thy_vs_Aplan-Pooled-Tail-Ref	chr5	142580238	142580238	C	G	Mmd2	c.75G>C	p.Ala25Ala	synonymous_variant	LOW	89	0	0.015	20	7	0.375	5.58476
Aplan-10-3619-Thy_vs_Aplan-Pooled-Tail-Ref	chr5	148303270	148303270	G	C	Mtus2	c.3631-213G>C		intron_variant	MODIFIER	170	0	0.007462	34	20	0.613	6.53628
Aplan-10-3619-Thy_vs_Aplan-Pooled-Tail-Ref	chr6	21216575	21216575	C	G	Kcnd2	c.277C>G	p.Arg93Gly	missense_variant	MODERATE	183	0	0.006597	55	30	0.555	6.39245
Aplan-10-3619-Thy_vs_Aplan-Pooled-Tail-Ref	chr6	30624610	30624610	G	C	Cpa5	c.448G>C	p.Asp150His	missense_variant	MODERATE	156	0	0.008287	82	30	0.362	6.28065
Aplan-10-3619-Thy_vs_Aplan-Pooled-Tail-Ref	chr6	38307321	38307321	G	C	Zc3hav1	c.*3738C>G		downstream_gene_variant	MODIFIER	150	0	0.007642	56	29	0.528	6.39436
Aplan-10-3619-Thy_vs_Aplan-Pooled-Tail-Ref	chr6	48765928	48765928	G	C	Gimap3	c.67C>G	p.Leu23Val	missense_variant	MODERATE	212	0	0.005377	36	12	0.333	7.17122
Aplan-10-3619-Thy_vs_Aplan-Pooled-Tail-Ref	chr6	50584456	50584456	G	C	4921507P07Rik	c.482C>G	p.Pro161Arg	missense_variant	MODERATE	109	0	0.012	32	16	0.518	6.80348
Aplan-10-3619-Thy_vs_Aplan-Pooled-Tail-Ref	chr6	53388868	53388868	G	T	Creb5	c.232G>T	p.Glu78*	stop_gained	HIGH	110	0	0.012	35	16	0.433	6.36601
Aplan-10-3619-Thy_vs_Aplan-Pooled-Tail-Ref	chr6	83049989	83049989	C	G	Loxl3	c.1798C>G	p.His600Asp	missense_variant	MODERATE	152	0	0.007513	31	7	0.214	5.6644
Aplan-10-3619-Thy_vs_Aplan-Pooled-Tail-Ref	chr6	83087946	83087946	G	C	Lbx2	c.463G>C	p.Gly155Arg	missense_variant	MODERATE	178	1	0.007359	16	9	0.565	6.18332
Aplan-10-3619-Thy_vs_Aplan-Pooled-Tail-Ref	chr6	83088024	83088024	G	A	Lbx2	c.541G>A	p.Asp181Asn	missense_variant	MODERATE	142	0	0.008795	12	8	0.584	7.76145
Aplan-10-3619-Thy_vs_Aplan-Pooled-Tail-Ref	chr6	91482318	91482318	C	G	Tmem43	c.770C>G	p.Pro257Arg	missense_variant	MODERATE	240	0	0.005269	36	15	0.444	6.09816
Aplan-10-3619-Thy_vs_Aplan-Pooled-Tail-Ref	chr6	113735074	113735074	G	C	Sec13	c.299C>G	p.Ser100Trp	missense_variant	MODERATE	125	0	0.009765	35	21	0.607	6.77174
Aplan-10-3619-Thy_vs_Aplan-Pooled-Tail-Ref	chr6	118153965	118153965	G	C	Ret	c.3236C>G	p.Thr1079Arg	missense_variant	MODERATE	121	0	0.009727	43	13	0.324	6.50963
Aplan-10-3619-Thy_vs_Aplan-Pooled-Tail-Ref	chr6	119951676	119951676	G	C	Wnk1	c.4090C>G	p.Arg1364Gly	missense_variant	MODERATE	117	1	0.011	69	34	0.509	5.97616
Aplan-10-3619-Thy_vs_Aplan-Pooled-Tail-Ref	chr6	125152619	125152619	G	C	Iffo1	c.1086G>C	p.Pro362Pro	synonymous_variant	LOW	74	0	0.017	14	8	0.545	7.3305
Aplan-10-3619-Thy_vs_Aplan-Pooled-Tail-Ref	chr6	125363648	125363648	G	C	Plekhg6	c.1748C>G	p.Pro583Arg	missense_variant	MODERATE	128	1	0.009441	24	5	0.263	3.44409
Aplan-10-3619-Thy_vs_Aplan-Pooled-Tail-Ref	chr6	129330932	129330932	G	C	4922502D21Rik	c.157+16C>G		intron_variant	MODIFIER	165	0	0.007417	69	22	0.346	6.8902
Aplan-10-3619-Thy_vs_Aplan-Pooled-Tail-Ref	chr6	134985864	134985864	C	G	Apold1	c.*1539C>G		3_prime_UTR_variant	MODIFIER	127	1	0.009158	69	36	0.546	6.2557
Aplan-10-3619-Thy_vs_Aplan-Pooled-Tail-Ref	chr6	135078651	135078651	C	G	Gprc5a	c.95C>G	p.Ala32Gly	missense_variant	MODERATE	157	0	0.007719	29	15	0.478	6.73167
Aplan-10-3619-Thy_vs_Aplan-Pooled-Tail-Ref	chr6	145047340	145047340	C	G	Bcat1	c.231G>C	p.Ala77Ala	synonymous_variant	LOW	257	0	0.004812	62	30	0.523	6.63506
Aplan-10-3619-Thy_vs_Aplan-Pooled-Tail-Ref	chr6	145246772	145246772	C	G	Kras	c.34G>C	p.Gly12Arg	missense_variant	MODERATE	196	0	0.006806	71	23	0.309	6.05377
Aplan-10-3619-Thy_vs_Aplan-Pooled-Tail-Ref	chr7	3233121	3233136	GCCCTTGACACAGTAA	G	Nlrp12	c.2515_2529delTTACTGTGTCAAGGG	p.Leu839_Gly843del	conservative_inframe_deletion	MODERATE	168	0	0.007222	12	5	0.463	6.27413
Aplan-10-3619-Thy_vs_Aplan-Pooled-Tail-Ref	chr7	12979636	12979636	G	C	Zfp446	c.828G>C	p.Gly276Gly	synonymous_variant	LOW	97	0	0.012	22	11	0.476	7.22066
Aplan-10-3619-Thy_vs_Aplan-Pooled-Tail-Ref	chr7	16248851	16248851	G	C	C5ar1	c.243C>G	p.Ala81Ala	synonymous_variant	LOW	67	0	0.017	25	14	0.518	6.0266
Aplan-10-3619-Thy_vs_Aplan-Pooled-Tail-Ref	chr7	16454116	16454116	C	G	Tmem160	c.209-5C>G		splice_region_variant&intron_variant	LOW	130	0	0.009683	35	19	0.519	6.73256
Aplan-10-3619-Thy_vs_Aplan-Pooled-Tail-Ref	chr7	16497913	16497913	C	G	Arhgap35	c.4240G>C	p.Ala1414Pro	missense_variant	MODERATE	97	0	0.012	24	13	0.565	6.91673
Aplan-10-3619-Thy_vs_Aplan-Pooled-Tail-Ref	chr7	17006142	17006142	G	C	Ppp5c	c.1273C>G	p.Arg425Gly	missense_variant	MODERATE	55	0	0.019	20	6	0.35	3.71559
Aplan-10-3619-Thy_vs_Aplan-Pooled-Tail-Ref	chr7	18816807	18816807	C	G	Psg17	c.1122G>C	p.Ala374Ala	synonymous_variant	LOW	361	0	0.003313	191	91	0.462	5.7529
Aplan-10-3619-Thy_vs_Aplan-Pooled-Tail-Ref	chr7	19858801	19858801	G	C	Ceacam16	c.181C>G	p.Leu61Val	missense_variant	MODERATE	210	0	0.005657	19	11	0.556	7.18274
Aplan-10-3619-Thy_vs_Aplan-Pooled-Tail-Ref	chr7	19905811	19905811	G	C	Pvr	c.1129C>G	p.Arg377Gly	missense_variant&splice_region_variant	MODERATE	36	0	0.037	21	11	0.5	5.71859
Aplan-10-3619-Thy_vs_Aplan-Pooled-Tail-Ref	chr7	24670630	24670630	G	C	Tex101	c.13C>G	p.Arg5Gly	missense_variant	MODERATE	230	0	0.00539	49	28	0.512	6.27771
Aplan-10-3619-Thy_vs_Aplan-Pooled-Tail-Ref	chr7	27673581	27673581	G	C	Map3k10	c.444C>G	p.Leu148Leu	synonymous_variant	LOW	139	0	0.008683	15	6	0.429	6.52557
Aplan-10-3619-Thy_vs_Aplan-Pooled-Tail-Ref	chr7	28316883	28316883	C	T	Supt5	c.2375G>A	p.Arg792His	missense_variant	MODERATE	178	0	0.006899	47	23	0.465	6.97366
Aplan-10-3619-Thy_vs_Aplan-Pooled-Tail-Ref	chr7	29247250	29247250	G	C	Yif1b	c.794G>C	p.Arg265Pro	missense_variant	MODERATE	246	0	0.005334	22	9	0.468	6.51694
Aplan-10-3619-Thy_vs_Aplan-Pooled-Tail-Ref	chr7	29400774	29400774	G	C	Sipa1l3	c.69C>G	p.Thr23Thr	synonymous_variant	LOW	112	0	0.011	13	9	0.617	6.15053
Aplan-10-3619-Thy_vs_Aplan-Pooled-Tail-Ref	chr7	30104730	30104730	C	G	Zfp260	c.54C>G	p.Pro18Pro	synonymous_variant	LOW	420	0	0.003086	64	29	0.427	6.60202
Aplan-10-3619-Thy_vs_Aplan-Pooled-Tail-Ref	chr7	30855141	30855141	C	G	Ffar3	c.753G>C	p.Pro251Pro	synonymous_variant	LOW	121	0	0.008798	25	13	0.522	6.11466
Aplan-10-3619-Thy_vs_Aplan-Pooled-Tail-Ref	chr7	39536906	39536906	C	G	Zfp619	c.2359C>G	p.Arg787Gly	missense_variant	MODERATE	99	0	0.012	35	12	0.344	5.99993
Aplan-10-3619-Thy_vs_Aplan-Pooled-Tail-Ref	chr7	44505694	44505694	G	C	Mybpc2	c.2788C>G	p.Pro930Ala	missense_variant	MODERATE	251	0	0.005287	35	13	0.433	7.32687
Aplan-10-3619-Thy_vs_Aplan-Pooled-Tail-Ref	chr7	45619308	45619308	G	C	Fut1	c.685G>C	p.Val229Leu	missense_variant	MODERATE	181	0	0.006321	40	20	0.444	7.07282
Aplan-10-3619-Thy_vs_Aplan-Pooled-Tail-Ref	chr7	47078863	47078863	G	C	Ptpn5	c.1588C>G	p.Leu530Val	missense_variant	MODERATE	119	0	0.01	43	16	0.363	6.94434
Aplan-10-3619-Thy_vs_Aplan-Pooled-Tail-Ref	chr7	80458833	80458833	G	C	Blm	c.4062C>G	p.Tyr1354*	stop_gained	HIGH	159	0	0.007273	45	23	0.466	6.65494
Aplan-10-3619-Thy_vs_Aplan-Pooled-Tail-Ref	chr7	97722606	97722606	G	C	Clns1a	c.*6088G>C		downstream_gene_variant	MODIFIER	29	0	0.035	11	5	0.462	3.15359
Aplan-10-3619-Thy_vs_Aplan-Pooled-Tail-Ref	chr7	98562897	98562897	C	G	Lrrc32-Emsy	n.98562897C>G		intergenic_region	MODIFIER	130	0	0.009939	64	23	0.36	6.59028
Aplan-10-3619-Thy_vs_Aplan-Pooled-Tail-Ref	chr7	120889259	120889259	C	G	Eef2k	c.1366C>G	p.Arg456Gly	missense_variant	MODERATE	110	0	0.011	30	11	0.348	6.30492
Aplan-10-3619-Thy_vs_Aplan-Pooled-Tail-Ref	chr7	125576470	125576470	G	C	Il4ra	c.1849G>C	p.Gly617Arg	missense_variant	MODERATE	78	0	0.014	15	5	0.375	4.23821
Aplan-10-3619-Thy_vs_Aplan-Pooled-Tail-Ref	chr7	126692028	126692028	G	C	Slx1b	c.598C>G	p.His200Asp	missense_variant	MODERATE	121	1	0.01	18	13	0.647	7.18682
Aplan-10-3619-Thy_vs_Aplan-Pooled-Tail-Ref	chr7	126783142	126783142	G	C	Ypel3	c.*3026G>C		downstream_gene_variant	MODIFIER	169	0	0.007137	21	10	0.421	6.65499
Aplan-10-3619-Thy_vs_Aplan-Pooled-Tail-Ref	chr7	126952136	126952136	G	C	Sez6l2	c.211+5G>C		splice_region_variant&intron_variant	LOW	86	0	0.014	14	5	0.385	4.57526
Aplan-10-3619-Thy_vs_Aplan-Pooled-Tail-Ref	chr7	127027997	127027997	G	C	Kif22	c.1876-7C>G		splice_region_variant&intron_variant	LOW	163	0	0.006559	43	18	0.378	7.14337
Aplan-10-3619-Thy_vs_Aplan-Pooled-Tail-Ref	chr7	127217736	127217736	G	A	45170	c.188C>T	p.Thr63Met	missense_variant	MODERATE	175	0	0.007029	28	12	0.44	6.06857
Aplan-10-3619-Thy_vs_Aplan-Pooled-Tail-Ref	chr7	127384977	127384977	G	C	9130019O22Rik	c.952C>G	p.Arg318Gly	missense_variant	MODERATE	351	0	0.003256	145	68	0.486	5.97568
Aplan-10-3619-Thy_vs_Aplan-Pooled-Tail-Ref	chr7	127404684	127404684	G	A	Zfp764	c.1274C>T	p.Pro425Leu	missense_variant	MODERATE	263	0	0.004637	72	26	0.339	6.27261
Aplan-10-3619-Thy_vs_Aplan-Pooled-Tail-Ref	chr7	127404999	127404999	G	C	Zfp764	c.959C>G	p.Pro320Arg	missense_variant	MODERATE	178	1	0.006439	89	45	0.487	5.82991
Aplan-10-3619-Thy_vs_Aplan-Pooled-Tail-Ref	chr7	127749773	127749773	G	C	Fbxl19	c.241G>C	p.Glu81Gln	missense_variant	MODERATE	100	0	0.012	13	8	0.557	6.47127
Aplan-10-3619-Thy_vs_Aplan-Pooled-Tail-Ref	chr7	133961093	133961093	G	C	Adam12	c.1139C>G	p.Pro380Arg	missense_variant	MODERATE	82	0	0.014	15	8	0.5	7.35138
Aplan-10-3619-Thy_vs_Aplan-Pooled-Tail-Ref	chr7	135514244	135514244	C	G	Clrn3	c.410-34G>C		intron_variant	MODIFIER	64	1	0.035	26	11	0.438	5.73504
Aplan-10-3619-Thy_vs_Aplan-Pooled-Tail-Ref	chr7	140150217	140150217	C	G	Mtg1	c.925C>G	p.Arg309Gly	missense_variant	MODERATE	165	0	0.008086	21	5	0.294	4.9363
Aplan-10-3619-Thy_vs_Aplan-Pooled-Tail-Ref	chr7	141110446	141110446	G	C	Ano9	c.274C>G	p.Arg92Gly	missense_variant	MODERATE	201	0	0.006101	53	23	0.405	6.8724
Aplan-10-3619-Thy_vs_Aplan-Pooled-Tail-Ref	chr7	143521392	143521392	C	G	Nap1l4	c.1065+9G>C		intron_variant	MODIFIER	252	0	0.005077	56	33	0.571	6.30702
Aplan-10-3619-Thy_vs_Aplan-Pooled-Tail-Ref	chr7	144411022	144411022	C	G	Shank2	c.2996C>G	p.Ala999Gly	missense_variant	MODERATE	80	0	0.014	17	9	0.473	7.76929
Aplan-10-3619-Thy_vs_Aplan-Pooled-Tail-Ref	chr7	144457708	144457708	G	C	Cttn	c.363C>G	p.Phe121Leu	missense_variant	MODERATE	137	0	0.009623	42	18	0.412	6.46603
Aplan-10-3619-Thy_vs_Aplan-Pooled-Tail-Ref	chr8	13018159	13018159	C	G	Mcf2l	c.3342C>G	p.Gly1114Gly	synonymous_variant	LOW	79	0	0.014	31	14	0.459	7.0451
Aplan-10-3619-Thy_vs_Aplan-Pooled-Tail-Ref	chr8	13409885	13409885	C	G	Grk1	c.1056C>G	p.Tyr352*	stop_gained	HIGH	153	0	0.008761	62	31	0.51	6.82105
Aplan-10-3619-Thy_vs_Aplan-Pooled-Tail-Ref	chr8	13476152	13476152	C	G	Gas6	c.785G>C	p.Arg262Pro	missense_variant	MODERATE	96	0	0.013	37	20	0.536	6.78329
Aplan-10-3619-Thy_vs_Aplan-Pooled-Tail-Ref	chr8	14928925	14928925	C	G	Arhgef10	c.191C>G	p.Thr64Arg	missense_variant	MODERATE	82	0	0.014	36	19	0.5	6.78531
Aplan-10-3619-Thy_vs_Aplan-Pooled-Tail-Ref	chr8	22011684	22011684	C	G	Atp7b	c.2582-25G>C		intron_variant	MODIFIER	173	1	0.007157	50	21	0.444	6.8901
Aplan-10-3619-Thy_vs_Aplan-Pooled-Tail-Ref	chr8	22390033	22390033	G	C	Slc25a15	c.95C>G	p.Thr32Arg	missense_variant	MODERATE	119	0	0.01	17	10	0.556	6.38893
Aplan-10-3619-Thy_vs_Aplan-Pooled-Tail-Ref	chr8	22474459	22474459	G	C	Smim19	c.-34C>G		5_prime_UTR_variant	MODIFIER	98	0	0.013	15	8	0.595	7.90048
Aplan-10-3619-Thy_vs_Aplan-Pooled-Tail-Ref	chr8	25889973	25889973	G	A	Kcnu1	c.1224G>A	p.Ser408Ser	synonymous_variant	LOW	277	0	0.004801	82	22	0.258	6.44365
Aplan-10-3619-Thy_vs_Aplan-Pooled-Tail-Ref	chr8	33571882	33571882	C	G	Tex15	c.1339C>G	p.Arg447Gly	missense_variant	MODERATE	187	0	0.006369	77	28	0.369	5.95038
Aplan-10-3619-Thy_vs_Aplan-Pooled-Tail-Ref	chr8	33681508	33681508	G	C	Gsr	c.673G>C	p.Ala225Pro	missense_variant	MODERATE	77	0	0.016	13	5	0.417	4.53337
Aplan-10-3619-Thy_vs_Aplan-Pooled-Tail-Ref	chr8	40380694	40380694	C	G	Micu3	c.1368C>G	p.Tyr456*	stop_gained	HIGH	142	0	0.008481	81	36	0.459	6.17867
Aplan-10-3619-Thy_vs_Aplan-Pooled-Tail-Ref	chr8	45245617	45245617	C	A	F11	c.1477+12G>T		intron_variant	MODIFIER	139	1	0.012	51	24	0.472	6.34257
Aplan-10-3619-Thy_vs_Aplan-Pooled-Tail-Ref	chr8	69797740	69797740	C	G	Atp13a1	c.1108C>G	p.Leu370Val	missense_variant	MODERATE	69	0	0.016	23	12	0.524	6.5836
Aplan-10-3619-Thy_vs_Aplan-Pooled-Tail-Ref	chr8	69816103	69816103	C	G	Gmip	c.1377C>G	p.Ser459Ser	synonymous_variant	LOW	87	0	0.013	24	14	0.55	7.30836
Aplan-10-3619-Thy_vs_Aplan-Pooled-Tail-Ref	chr8	70837165	70837165	G	C	Arrdc2	c.794C>G	p.Pro265Arg	missense_variant	MODERATE	97	0	0.012	28	12	0.443	6.92092
Aplan-10-3619-Thy_vs_Aplan-Pooled-Tail-Ref	chr8	70913551	70913551	C	T	Map1s	c.1099C>T	p.Arg367Cys	missense_variant	MODERATE	115	0	0.011	16	10	0.572	6.52711
Aplan-10-3619-Thy_vs_Aplan-Pooled-Tail-Ref	chr8	71386045	71386045	G	C	Ushbp1	c.1743-7C>G		splice_region_variant&intron_variant	LOW	51	0	0.022	11	6	0.5	5.12405
Aplan-10-3619-Thy_vs_Aplan-Pooled-Tail-Ref	chr8	83255921	83255921	C	G	Tbc1d9	c.2334C>G	p.Tyr778*	stop_gained	HIGH	110	0	0.011	22	12	0.501	6.94567
Aplan-10-3619-Thy_vs_Aplan-Pooled-Tail-Ref	chr8	87781197	87781197	C	G	Zfp423	c.2518G>C	p.Val840Leu	missense_variant	MODERATE	116	0	0.009899	19	7	0.389	6.43891
Aplan-10-3619-Thy_vs_Aplan-Pooled-Tail-Ref	chr8	88144599	88144599	C	G	Heatr3	c.580C>G	p.Arg194Gly	missense_variant	MODERATE	130	0	0.009493	51	21	0.436	6.92799
Aplan-10-3619-Thy_vs_Aplan-Pooled-Tail-Ref	chr8	95571022	95571022	G	C	Prss54	c.219C>G	p.Ser73Ser	synonymous_variant	LOW	112	0	0.012	13	6	0.364	6.43671
Aplan-10-3619-Thy_vs_Aplan-Pooled-Tail-Ref	chr8	105268566	105268566	C	G	Fbxl8	c.709C>G	p.Leu237Val	missense_variant	MODERATE	144	0	0.007703	10	6	0.632	7.90276
Aplan-10-3619-Thy_vs_Aplan-Pooled-Tail-Ref	chr8	105293543	105293543	C	G	Exoc3l	c.749G>C	p.Arg250Pro	missense_variant	MODERATE	94	0	0.011	22	9	0.381	7.18544
Aplan-10-3619-Thy_vs_Aplan-Pooled-Tail-Ref	chr8	117043274	117043274	C	G	Pkd1l2	c.3439G>C	p.Gly1147Arg	missense_variant	MODERATE	52	0	0.024	26	11	0.455	6.00294
Aplan-10-3619-Thy_vs_Aplan-Pooled-Tail-Ref	chr8	117059565	117059565	C	G	Pkd1l2	c.1900G>C	p.Ala634Pro	missense_variant	MODERATE	92	0	0.014	16	7	0.467	6.38692
Aplan-10-3619-Thy_vs_Aplan-Pooled-Tail-Ref	chr8	119941929	119941929	C	G	Usp10	c.968C>G	p.Ser323Cys	missense_variant	MODERATE	97	0	0.012	30	12	0.417	6.60126
Aplan-10-3619-Thy_vs_Aplan-Pooled-Tail-Ref	chr8	120608966	120608966	G	C	Emc8-1190005i06rik	c.*6C>G		3_prime_UTR_variant	MODIFIER	140	0	0.008823	21	13	0.632	6.00933
Aplan-10-3619-Thy_vs_Aplan-Pooled-Tail-Ref	chr8	122482408	122482408	G	A	Piezo1	c.7293C>T	p.Ile2431Ile	synonymous_variant	LOW	128	0	0.009481	17	6	0.412	5.97279
Aplan-10-3619-Thy_vs_Aplan-Pooled-Tail-Ref	chr9	21474653	21474653	G	C	Dnm2	c.971G>C	p.Arg324Pro	missense_variant	MODERATE	211	0	0.005472	29	15	0.542	6.55127
Aplan-10-3619-Thy_vs_Aplan-Pooled-Tail-Ref	chr9	21480426	21480426	G	C	Dnm2	c.1336-907G>C		intron_variant	MODIFIER	104	0	0.012	31	21	0.632	6.63036
Aplan-10-3619-Thy_vs_Aplan-Pooled-Tail-Ref	chr9	30951384	30951384	C	G	Adamts8	c.884C>G	p.Pro295Arg	missense_variant	MODERATE	154	0	0.008156	26	9	0.333	6.26255
Aplan-10-3619-Thy_vs_Aplan-Pooled-Tail-Ref	chr9	43137407	43137407	G	C	Pou2f3	c.773C>G	p.Ala258Gly	missense_variant	MODERATE	63	0	0.021	15	5	0.384	3.84696
Aplan-10-3619-Thy_vs_Aplan-Pooled-Tail-Ref	chr9	57677407	57677407	G	C	Cyp1a2	c.1363C>G	p.Arg455Gly	missense_variant	MODERATE	68	0	0.017	24	10	0.45	6.56544
Aplan-10-3619-Thy_vs_Aplan-Pooled-Tail-Ref	chr9	59712156	59712156	G	A	Gramd2	c.588+10G>A		intron_variant	MODIFIER	128	0	0.009276	26	9	0.353	7.52969
Aplan-10-3619-Thy_vs_Aplan-Pooled-Tail-Ref	chr9	64907181	64907181	G	C	Dennd4a	c.4590G>C	p.Ser1530Ser	synonymous_variant	LOW	181	0	0.006654	90	21	0.233	6.44462
Aplan-10-3619-Thy_vs_Aplan-Pooled-Tail-Ref	chr9	78377638	78377638	G	C	Ooep	c.412C>G	p.Leu138Val	missense_variant	MODERATE	85	0	0.016	32	10	0.308	6.1407
Aplan-10-3619-Thy_vs_Aplan-Pooled-Tail-Ref	chr9	103226863	103226863	C	G	Trf	c.300G>C	p.Ala100Ala	synonymous_variant	LOW	300	0	0.004612	24	7	0.35	6.23319
Aplan-10-3619-Thy_vs_Aplan-Pooled-Tail-Ref	chr9	104099567	104099567	G	C	Ackr4	c.180C>G	p.Ser60Ser	synonymous_variant	LOW	118	0	0.009252	58	26	0.425	6.10674
Aplan-10-3619-Thy_vs_Aplan-Pooled-Tail-Ref	chr9	106881838	106881838	G	C	Vprbp	c.*1854G>C		downstream_gene_variant	MODIFIER	102	0	0.012	28	19	0.667	6.93457
Aplan-10-3619-Thy_vs_Aplan-Pooled-Tail-Ref	chr9	107570680	107570680	C	G	Hyal2	c.531C>G	p.Tyr177*	stop_gained	HIGH	170	1	0.006546	33	7	0.276	4.92448
Aplan-10-3619-Thy_vs_Aplan-Pooled-Tail-Ref	chr9	108496419	108496419	C	G	Usp19	c.2109+4C>G		splice_region_variant&intron_variant	LOW	93	0	0.012	27	14	0.496	6.94343
Aplan-10-3619-Thy_vs_Aplan-Pooled-Tail-Ref	chr9	110897752	110897752	C	G	Als2cl	c.2597C>G	p.Thr866Arg	missense_variant	MODERATE	126	0	0.00996	27	10	0.385	6.37928
Aplan-10-3619-Thy_vs_Aplan-Pooled-Tail-Ref	chr9	119148695	119148695	C	G	Dlec1	c.*1001C>G		downstream_gene_variant	MODIFIER	129	0	0.008941	52	24	0.478	6.27509
Aplan-10-3619-Thy_vs_Aplan-Pooled-Tail-Ref	chr9	121448845	121448845	C	T	Trak1	c.996C>T	p.Tyr332Tyr	synonymous_variant	LOW	180	0	0.006514	19	15	0.769	6.51308
Aplan-10-3619-Thy_vs_Aplan-Pooled-Tail-Ref	chr10	25484278	25484278	C	G	Epb41l2	c.1537C>G	p.Arg513Gly	missense_variant	MODERATE	60	0	0.02	32	11	0.35	5.61972
Aplan-10-3619-Thy_vs_Aplan-Pooled-Tail-Ref	chr10	39030447	39030447	G	C	Lama4	c.808G>C	p.Val270Leu	missense_variant	MODERATE	91	0	0.013	49	29	0.59	5.96777
Aplan-10-3619-Thy_vs_Aplan-Pooled-Tail-Ref	chr10	41264020	41264020	C	G	Fig4	c.904G>C	p.Glu302Gln	missense_variant	MODERATE	182	0	0.006939	64	28	0.408	6.08176
Aplan-10-3619-Thy_vs_Aplan-Pooled-Tail-Ref	chr10	60186355	60186355	G	C	Chst3	c.687C>G	p.Cys229Trp	missense_variant	MODERATE	104	0	0.011	36	21	0.576	6.82129
Aplan-10-3619-Thy_vs_Aplan-Pooled-Tail-Ref	chr10	60186809	60186809	G	C	Chst3	c.233C>G	p.Ser78Trp	missense_variant	MODERATE	113	0	0.011	20	8	0.438	7.19183
Aplan-10-3619-Thy_vs_Aplan-Pooled-Tail-Ref	chr10	60323490	60323490	G	C	Cdh23	c.6505C>G	p.Arg2169Gly	missense_variant	MODERATE	180	0	0.0064	20	11	0.55	6.49817
Aplan-10-3619-Thy_vs_Aplan-Pooled-Tail-Ref	chr10	62109039	62109039	G	T	2010107G23Rik	c.178C>A	p.Gln60Lys	missense_variant	MODERATE	68	0	0.018	15	7	0.429	5.8097
Aplan-10-3619-Thy_vs_Aplan-Pooled-Tail-Ref	chr10	75928500	75928500	G	C	Mmp11	c.130C>G	p.Arg44Gly	missense_variant	MODERATE	43	0	0.024	16	11	0.6	7.80668
Aplan-10-3619-Thy_vs_Aplan-Pooled-Tail-Ref	chr10	76711611	76711611	C	G	Col6a1	c.2027G>C	p.Arg676Pro	missense_variant	MODERATE	223	0	0.005982	44	23	0.513	6.37189
Aplan-10-3619-Thy_vs_Aplan-Pooled-Tail-Ref	chr10	77870506	77870506	C	G	Tspear	c.1109C>G	p.Thr370Arg	missense_variant	MODERATE	76	1	0.034	34	15	0.4	6.23004
Aplan-10-3619-Thy_vs_Aplan-Pooled-Tail-Ref	chr10	78401792	78401792	G	C	Rrp1	c.1294+58C>G		intron_variant	MODIFIER	131	0	0.00915	35	12	0.4	7.03993
Aplan-10-3619-Thy_vs_Aplan-Pooled-Tail-Ref	chr10	79724551	79724551	G	C	Hcn2	c.715G>C	p.Gly239Arg	missense_variant	MODERATE	80	0	0.015	32	14	0.444	6.92949
Aplan-10-3619-Thy_vs_Aplan-Pooled-Tail-Ref	chr10	79826530	79826530	G	C	Misp	c.780G>C	p.Thr260Thr	synonymous_variant	LOW	78	0	0.015	34	21	0.556	6.91181
Aplan-10-3619-Thy_vs_Aplan-Pooled-Tail-Ref	chr10	79826682	79826682	G	C	Misp	c.932G>C	p.Arg311Pro	missense_variant	MODERATE	88	0	0.013	25	8	0.318	5.67497
Aplan-10-3619-Thy_vs_Aplan-Pooled-Tail-Ref	chr10	80136414	80136414	G	C	Cbarp	c.379C>G	p.Arg127Gly	missense_variant	MODERATE	87	1	0.027	8	5	0.625	5.24888
Aplan-10-3619-Thy_vs_Aplan-Pooled-Tail-Ref	chr10	80238297	80238297	G	C	Bc1	n.94+131247C>G		intron_variant	MODIFIER	58	0	0.021	33	20	0.574	6.2381
Aplan-10-3619-Thy_vs_Aplan-Pooled-Tail-Ref	chr10	80382295	80382295	C	G	Mex3d	c.1087G>C	p.Val363Leu	missense_variant	MODERATE	165	0	0.007018	27	7	0.238	6.2842
Aplan-10-3619-Thy_vs_Aplan-Pooled-Tail-Ref	chr10	80910022	80910022	G	C	Lmnb2	c.222C>G	p.Tyr74*	stop_gained	HIGH	95	0	0.012	25	6	0.25	4.3144
Aplan-10-3619-Thy_vs_Aplan-Pooled-Tail-Ref	chr10	81246604	81246604	G	C	Zfr2	c.1575G>C	p.Pro525Pro	synonymous_variant	LOW	59	0	0.021	33	13	0.422	6.59057
Aplan-10-3619-Thy_vs_Aplan-Pooled-Tail-Ref	chr10	81250644	81250644	G	C	Zfr2	c.2352G>C	p.Pro784Pro	synonymous_variant	LOW	80	1	0.028	13	5	0.364	3.86225
Aplan-10-3619-Thy_vs_Aplan-Pooled-Tail-Ref	chr10	81265758	81265758	G	C	Mrpl54	c.168C>G	p.Pro56Pro	synonymous_variant	LOW	78	0	0.016	15	8	0.455	7.19938
Aplan-10-3619-Thy_vs_Aplan-Pooled-Tail-Ref	chr10	81272926	81272926	G	C	Apba3	c.1611G>C	p.Ala537Ala	synonymous_variant	LOW	140	0	0.008011	44	8	0.2	5.19747
Aplan-10-3619-Thy_vs_Aplan-Pooled-Tail-Ref	chr10	86064061	86064061	G	C	Syn3	c.1228-12C>G		intron_variant	MODIFIER	105	0	0.011	46	23	0.447	6.47013
Aplan-10-3619-Thy_vs_Aplan-Pooled-Tail-Ref	chr10	112024398	112024398	C	G	Glipr1-Glipr1l1	n.112024398C>G		intergenic_region	MODIFIER	65	0	0.02	43	15	0.355	6.76184
Aplan-10-3619-Thy_vs_Aplan-Pooled-Tail-Ref	chr10	115456604	115456604	G	C	Lgr5	c.1552+44C>G		intron_variant	MODIFIER	168	0	0.007064	59	18	0.308	6.78898
Aplan-10-3619-Thy_vs_Aplan-Pooled-Tail-Ref	chr10	117792630	117792630	C	G	Nup107	c.-19G>C		5_prime_UTR_variant	MODIFIER	95	0	0.014	17	9	0.5	6.37188
Aplan-10-3619-Thy_vs_Aplan-Pooled-Tail-Ref	chr10	121343516	121343516	G	C	Tbc1d30-Gns	n.121343516G>C		intergenic_region	MODIFIER	565	1	0.002136	214	97	0.45	5.83926
Aplan-10-3619-Thy_vs_Aplan-Pooled-Tail-Ref	chr10	123032565	123032565	G	C	Mon2	c.1582C>G	p.Arg528Gly	missense_variant	MODERATE	188	0	0.00693	31	11	0.296	6.47321
Aplan-10-3619-Thy_vs_Aplan-Pooled-Tail-Ref	chr10	127322910	127322910	G	C	Arhgap9	c.513+20G>C		intron_variant	MODIFIER	58	0	0.019	11	8	0.636	7.7048
Aplan-10-3619-Thy_vs_Aplan-Pooled-Tail-Ref	chr10	128676298	128676298	G	C	Suox	c.-3707C>G		upstream_gene_variant	MODIFIER	491	0	0.002526	174	75	0.427	5.65762
Aplan-10-3619-Thy_vs_Aplan-Pooled-Tail-Ref	chr11	6264693	6264693	G	C	Ddx56	c.993C>G	p.Arg331Arg	synonymous_variant	LOW	227	0	0.005432	53	25	0.438	6.72256
Aplan-10-3619-Thy_vs_Aplan-Pooled-Tail-Ref	chr11	11761323	11761323	C	CCG	Ikzf1	c.817_818insCG	p.Arg273fs	frameshift_variant	HIGH	68	0	0.017	58	26	0.466	6.00067
Aplan-10-3619-Thy_vs_Aplan-Pooled-Tail-Ref	chr11	28434146	28434146	A	G	Ccdc85a	c.1228T>C	p.Ser410Pro	missense_variant	MODERATE	70	0	0.018	18	8	0.443	6.167
Aplan-10-3619-Thy_vs_Aplan-Pooled-Tail-Ref	chr11	36008481	36008481	C	G	Tenm2	c.7849G>C	p.Ala2617Pro	missense_variant	MODERATE	222	0	0.005231	34	13	0.37	6.99264
Aplan-10-3619-Thy_vs_Aplan-Pooled-Tail-Ref	chr11	36010370	36010370	C	G	Tenm2	c.7533+5G>C		splice_region_variant&intron_variant	LOW	65	0	0.017	18	7	0.388	5.11549
Aplan-10-3619-Thy_vs_Aplan-Pooled-Tail-Ref	chr11	50233607	50233607	C	G	Mgat4b	c.1293C>G	p.Ala431Ala	synonymous_variant	LOW	98	0	0.011	32	14	0.5	6.29526
Aplan-10-3619-Thy_vs_Aplan-Pooled-Tail-Ref	chr11	54466252	54466252	C	G	Fnip1	c.219+39C>G		intron_variant	MODIFIER	54	0	0.023	26	15	0.56	7.09824
Aplan-10-3619-Thy_vs_Aplan-Pooled-Tail-Ref	chr11	59570830	59570830	T	C	Olfr222	c.909A>G	p.Gly303Gly	synonymous_variant	LOW	162	0	0.007752	49	24	0.51	6.84424
Aplan-10-3619-Thy_vs_Aplan-Pooled-Tail-Ref	chr11	59833059	59833059	C	G	Cops3	c.271G>C	p.Glu91Gln	missense_variant	MODERATE	230	0	0.005643	104	42	0.405	5.84525
Aplan-10-3619-Thy_vs_Aplan-Pooled-Tail-Ref	chr11	60491059	60491059	G	C	Myo15	c.4468G>C	p.Ala1490Pro	missense_variant	MODERATE	138	0	0.009262	24	12	0.524	7.37641
Aplan-10-3619-Thy_vs_Aplan-Pooled-Tail-Ref	chr11	61487914	61487914	C	G	Mfap4	c.687C>G	p.Leu229Leu	synonymous_variant	LOW	128	0	0.009379	43	20	0.444	6.13763
Aplan-10-3619-Thy_vs_Aplan-Pooled-Tail-Ref	chr11	62343171	62343171	G	C	Ncor1	c.4369C>G	p.Arg1457Gly	missense_variant	MODERATE	175	0	0.007079	37	19	0.515	6.61264
Aplan-10-3619-Thy_vs_Aplan-Pooled-Tail-Ref	chr11	69483256	69483256	G	C	Dnah2	c.4588C>G	p.Arg1530Gly	missense_variant	MODERATE	244	0	0.005353	40	16	0.424	6.51963
Aplan-10-3619-Thy_vs_Aplan-Pooled-Tail-Ref	chr11	69804582	69804582	C	G	Tmem102	c.563G>C	p.Arg188Pro	missense_variant	MODERATE	159	0	0.007291	61	35	0.544	6.54479
Aplan-10-3619-Thy_vs_Aplan-Pooled-Tail-Ref	chr11	70097788	70097788	C	G	Asgr2	c.338-32C>G		intron_variant	MODIFIER	144	0	0.008098	39	20	0.5	6.13772
Aplan-10-3619-Thy_vs_Aplan-Pooled-Tail-Ref	chr11	70465956	70465956	C	G	Zmynd15	c.2081C>G	p.Pro694Arg	missense_variant	MODERATE	114	0	0.011	12	5	0.364	5.48906
Aplan-10-3619-Thy_vs_Aplan-Pooled-Tail-Ref	chr11	72980636	72980636	G	C	Atp2a3	c.1962G>C	p.Thr654Thr	synonymous_variant	LOW	98	0	0.013	28	11	0.375	6.1914
Aplan-10-3619-Thy_vs_Aplan-Pooled-Tail-Ref	chr11	73240553	73240553	G	C	Trpv1	c.916G>C	p.Val306Leu	missense_variant	MODERATE	191	0	0.006163	36	20	0.556	6.75231
Aplan-10-3619-Thy_vs_Aplan-Pooled-Tail-Ref	chr11	76782223	76782223	C	G	Cpd	c.4095G>C	p.Thr1365Thr	synonymous_variant	LOW	84	0	0.014	43	20	0.455	6.37761
Aplan-10-3619-Thy_vs_Aplan-Pooled-Tail-Ref	chr11	78269660	78269660	C	G	2610507B11Rik	c.1944C>G	p.Ser648Ser	synonymous_variant	LOW	156	0	0.007952	33	19	0.543	6.71884
Aplan-10-3619-Thy_vs_Aplan-Pooled-Tail-Ref	chr11	78952986	78952986	G	C	Nos2	c.2758G>C	p.Ala920Pro	missense_variant	MODERATE	118	0	0.01	23	12	0.55	6.99499
Aplan-10-3619-Thy_vs_Aplan-Pooled-Tail-Ref	chr11	86244492	86244492	C	G	Ints2	c.1095G>C	p.Ser365Ser	synonymous_variant	LOW	146	0	0.008986	34	19	0.54	6.25832
Aplan-10-3619-Thy_vs_Aplan-Pooled-Tail-Ref	chr11	86770134	86770134	C	G	Dhx40	c.2328G>C	p.Lys776Asn	missense_variant	MODERATE	106	0	0.011	34	16	0.483	6.35885
Aplan-10-3619-Thy_vs_Aplan-Pooled-Tail-Ref	chr11	94361345	94361345	C	G	Abcc3	c.2411G>C	p.Arg804Pro	missense_variant	MODERATE	33	0	0.031	21	8	0.368	3.70868
Aplan-10-3619-Thy_vs_Aplan-Pooled-Tail-Ref	chr11	94565151	94565151	G	C	Chad	c.54G>C	p.Ala18Ala	synonymous_variant	LOW	259	1	0.004836	24	12	0.516	6.1052
Aplan-10-3619-Thy_vs_Aplan-Pooled-Tail-Ref	chr11	99322875	99322875	G	C	Krt25	c.17C>G	p.Ser6Cys	missense_variant	MODERATE	93	0	0.012	32	13	0.464	6.85572
Aplan-10-3619-Thy_vs_Aplan-Pooled-Tail-Ref	chr11	100142149	100142149	C	G	Krt19	c.572G>C	p.Arg191Pro	missense_variant	MODERATE	141	0	0.008221	45	17	0.378	6.80123
Aplan-10-3619-Thy_vs_Aplan-Pooled-Tail-Ref	chr11	101091130	101091130	G	C	Mlx	c.862G>C	p.Gly288Arg	missense_variant	MODERATE	161	0	0.007931	75	33	0.407	6.67951
Aplan-10-3619-Thy_vs_Aplan-Pooled-Tail-Ref	chr11	101372669	101372669	C	G	G6pc	c.341-33C>G		intron_variant	MODIFIER	91	0	0.014	33	12	0.367	7.65207
Aplan-10-3619-Thy_vs_Aplan-Pooled-Tail-Ref	chr11	101526211	101526211	C	G	Brca1	c.1096G>C	p.Asp366His	missense_variant	MODERATE	187	0	0.00607	64	26	0.444	6.09538
Aplan-10-3619-Thy_vs_Aplan-Pooled-Tail-Ref	chr11	101586405	101586405	C	G	Nbr1	c.*5647C>G		downstream_gene_variant	MODIFIER	150	0	0.008153	37	20	0.546	6.6242
Aplan-10-3619-Thy_vs_Aplan-Pooled-Tail-Ref	chr11	103542030	103542030	G	C	Gm884	c.3784C>G	p.Arg1262Gly	missense_variant	MODERATE	338	0	0.003567	51	27	0.531	6.35474
Aplan-10-3619-Thy_vs_Aplan-Pooled-Tail-Ref	chr11	106142442	106142442	C	G	Map3k3	c.520C>G	p.Arg174Gly	missense_variant	MODERATE	115	0	0.011	69	33	0.44	5.79114
Aplan-10-3619-Thy_vs_Aplan-Pooled-Tail-Ref	chr11	106320260	106320260	G	C	Scn4a	c.4930C>G	p.Pro1644Ala	missense_variant	MODERATE	127	0	0.009016	66	35	0.557	6.11309
Aplan-10-3619-Thy_vs_Aplan-Pooled-Tail-Ref	chr11	106688816	106688816	G	C	Pecam1	c.1419C>G	p.His473Gln	missense_variant	MODERATE	214	0	0.005705	38	15	0.414	6.69174
Aplan-10-3619-Thy_vs_Aplan-Pooled-Tail-Ref	chr11	109453415	109453415	C	G	LOC100503496	n.*56C>G		downstream_gene_variant	MODIFIER	59	0	0.02	16	10	0.6	6.08412
Aplan-10-3619-Thy_vs_Aplan-Pooled-Tail-Ref	chr11	113624853	113624853	C	G	Sstr2	c.597C>G	p.Gly199Gly	synonymous_variant	LOW	174	0	0.006562	50	33	0.648	6.68391
Aplan-10-3619-Thy_vs_Aplan-Pooled-Tail-Ref	chr11	114448871	114448871	G	C	4932435O22Rik	n.-11C>G		upstream_gene_variant	MODIFIER	107	0	0.012	25	7	0.261	5.38946
Aplan-10-3619-Thy_vs_Aplan-Pooled-Tail-Ref	chr11	115979625	115979625	C	G	Itgb4	c.279C>G	p.Ile93Met	missense_variant	MODERATE	56	0	0.019	14	6	0.462	4.6401
Aplan-10-3619-Thy_vs_Aplan-Pooled-Tail-Ref	chr11	115981121	115981121	C	G	Itgb4	c.741+9C>G		intron_variant	MODIFIER	80	0	0.015	15	7	0.5	6.23482
Aplan-10-3619-Thy_vs_Aplan-Pooled-Tail-Ref	chr11	116050756	116050756	C	G	Unk	c.828C>G	p.Asp276Glu	missense_variant	MODERATE	69	0	0.017	22	18	0.79	7.21863
Aplan-10-3619-Thy_vs_Aplan-Pooled-Tail-Ref	chr11	116685290	116685290	C	G	St6galnac2	c.359-25G>C		intron_variant	MODIFIER	52	0	0.019	18	5	0.294	3.15001
Aplan-10-3619-Thy_vs_Aplan-Pooled-Tail-Ref	chr11	116861666	116861666	G	C	Mfsd11	c.640G>C	p.Glu214Gln	missense_variant&splice_region_variant	MODERATE	156	0	0.007617	43	21	0.511	6.62228
Aplan-10-3619-Thy_vs_Aplan-Pooled-Tail-Ref	chr11	119317217	119317217	C	G	Card14	c.112C>G	p.Arg38Gly	missense_variant	MODERATE	115	0	0.011	22	6	0.333	5.04198
Aplan-10-3619-Thy_vs_Aplan-Pooled-Tail-Ref	chr11	119346431	119346431	G	C	Sgsh	c.1356C>G	p.Ala452Ala	synonymous_variant	LOW	277	0	0.004226	26	10	0.417	7.40708
Aplan-10-3619-Thy_vs_Aplan-Pooled-Tail-Ref	chr11	120719115	120719115	C	G	Lrrc45	c.1384C>G	p.Arg462Gly	missense_variant	MODERATE	87	0	0.014	14	7	0.455	6.69997
Aplan-10-3619-Thy_vs_Aplan-Pooled-Tail-Ref	chr11	121037113	121037113	G	T	Cd7	c.563C>A	p.Pro188Gln	missense_variant	MODERATE	205	0	0.006273	52	20	0.379	6.22053
Aplan-10-3619-Thy_vs_Aplan-Pooled-Tail-Ref	chr11	121329355	121329355	G	C	Wdr45b	c.777C>G	p.Ala259Ala	synonymous_variant	LOW	224	0	0.005891	94	34	0.366	6.73909
Aplan-10-3619-Thy_vs_Aplan-Pooled-Tail-Ref	chr12	53142085	53142085	G	C	Akap6	c.6281G>C	p.Arg2094Pro	missense_variant	MODERATE	192	0	0.005963	69	29	0.442	6.41262
Aplan-10-3619-Thy_vs_Aplan-Pooled-Tail-Ref	chr12	110639835	110639835	C	G	Dync1h1	c.7338C>G	p.Asp2446Glu	missense_variant	MODERATE	81	0	0.014	23	5	0.263	3.43664
Aplan-10-3619-Thy_vs_Aplan-Pooled-Tail-Ref	chr12	112732514	112732514	G	C	Cep170b	c.289G>C	p.Val97Leu	missense_variant	MODERATE	57	0	0.021	25	13	0.5	6.16998
Aplan-10-3619-Thy_vs_Aplan-Pooled-Tail-Ref	chr12	112733580	112733580	G	C	Mir6940	n.*189G>C		downstream_gene_variant	MODIFIER	27	0	0.037	15	8	0.429	4.26344
Aplan-10-3619-Thy_vs_Aplan-Pooled-Tail-Ref	chr12	116370041	116370041	C	G	Esyt2	c.2472C>G	p.Leu824Leu	synonymous_variant	LOW	194	0	0.006142	75	34	0.492	6.62194
Aplan-10-3619-Thy_vs_Aplan-Pooled-Tail-Ref	chr13	8672461	8672461	C	G	Adarb2	c.1152C>G	p.Val384Val	synonymous_variant	LOW	127	0	0.01	32	9	0.299	6.70477
Aplan-10-3619-Thy_vs_Aplan-Pooled-Tail-Ref	chr13	25107554	25107554	C	G	Dcdc2a	c.558-37C>G		intron_variant	MODIFIER	101	0	0.012	28	7	0.293	4.92641
Aplan-10-3619-Thy_vs_Aplan-Pooled-Tail-Ref	chr13	45408377	45408377	C	G	Mylip	c.849C>G	p.Ala283Ala	synonymous_variant	LOW	60	0	0.019	18	7	0.475	4.91916
Aplan-10-3619-Thy_vs_Aplan-Pooled-Tail-Ref	chr13	49090988	49090988	C	G	Wnk2	c.1371G>C	p.Thr457Thr	synonymous_variant	LOW	75	0	0.014	19	14	0.647	6.52145
Aplan-10-3619-Thy_vs_Aplan-Pooled-Tail-Ref	chr13	59664339	59664339	C	G	Golm1	c.168G>C	p.Ala56Ala	synonymous_variant	LOW	138	0	0.009198	21	9	0.474	6.69974
Aplan-10-3619-Thy_vs_Aplan-Pooled-Tail-Ref	chr13	64220691	64220691	C	G	Cdc14b	c.553G>C	p.Ala185Pro	missense_variant	MODERATE	171	0	0.007403	45	19	0.444	6.60566
Aplan-10-3619-Thy_vs_Aplan-Pooled-Tail-Ref	chr13	97093675	97093675	G	C	Fam169a	c.217G>C	p.Glu73Gln	missense_variant	MODERATE	224	0	0.005773	96	42	0.438	6.06347
Aplan-10-3619-Thy_vs_Aplan-Pooled-Tail-Ref	chr13	97985350	97985350	G	C	Arhgef28	c.1705C>G	p.Arg569Gly	missense_variant	MODERATE	74	0	0.017	28	11	0.391	6.91888
Aplan-10-3619-Thy_vs_Aplan-Pooled-Tail-Ref	chr13	102772525	102772525	C	G	Mast4	c.2017G>C	p.Ala673Pro	missense_variant	MODERATE	87	0	0.014	20	10	0.5	6.37559
Aplan-10-3619-Thy_vs_Aplan-Pooled-Tail-Ref	chr14	14855630	14855630	C	G	Nek10	c.1169-46C>G		intron_variant	MODIFIER	102	0	0.012	25	6	0.25	4.46522
Aplan-10-3619-Thy_vs_Aplan-Pooled-Tail-Ref	chr14	36926861	36926861	C	G	Ccser2	c.1680G>C	p.Pro560Pro	synonymous_variant	LOW	224	0	0.00591	80	39	0.515	6.20297
Aplan-10-3619-Thy_vs_Aplan-Pooled-Tail-Ref	chr14	44368903	44368903	G	C	1700047E10Rik-BC061237	n.44368903G>C		intergenic_region	MODIFIER	196	0	0.006269	39	9	0.256	7.38634
Aplan-10-3619-Thy_vs_Aplan-Pooled-Tail-Ref	chr14	55871551	55871551	C	G	Nynrin	c.4114C>G	p.Arg1372Gly	missense_variant	MODERATE	382	0	0.003208	68	27	0.37	6.3302
Aplan-10-3619-Thy_vs_Aplan-Pooled-Tail-Ref	chr14	63493785	63493785	G	A	Tdh	c.939C>T	p.Asp313Asp	synonymous_variant	LOW	64	0	0.019	13	5	0.364	4.18616
Aplan-10-3619-Thy_vs_Aplan-Pooled-Tail-Ref	chr14	70508039	70508039	C	G	Bmp1	c.705G>C	p.Arg235Arg	synonymous_variant	LOW	93	1	0.026	37	25	0.613	6.93642
Aplan-10-3619-Thy_vs_Aplan-Pooled-Tail-Ref	chr14	121658730	121658730	C	G	Dock9	c.556G>C	p.Ala186Pro	missense_variant	MODERATE	70	0	0.017	13	7	0.583	6.38373
Aplan-10-3619-Thy_vs_Aplan-Pooled-Tail-Ref	chr14	122668576	122668576	G	C	Pcca	c.958G>C	p.Ala320Pro	missense_variant	MODERATE	114	1	0.022	57	33	0.565	6.07593
Aplan-10-3619-Thy_vs_Aplan-Pooled-Tail-Ref	chr15	25778186	25778186	C	G	Myo10	c.2275C>G	p.Arg759Gly	missense_variant&splice_region_variant	MODERATE	73	0	0.016	24	7	0.263	4.56957
Aplan-10-3619-Thy_vs_Aplan-Pooled-Tail-Ref	chr15	28313766	28313766	G	T	Dnah5	c.5727G>T	p.Thr1909Thr	synonymous_variant	LOW	89	0	0.013	34	9	0.31	5.39948
Aplan-10-3619-Thy_vs_Aplan-Pooled-Tail-Ref	chr15	34399169	34399169	C	G	Matn2	c.1201C>G	p.Arg401Gly	missense_variant	MODERATE	206	0	0.005944	61	30	0.491	6.37708
Aplan-10-3619-Thy_vs_Aplan-Pooled-Tail-Ref	chr15	57938021	57938021	C	G	Tbc1d31	c.951C>G	p.His317Gln	missense_variant	MODERATE	149	0	0.008547	82	35	0.462	6.32125
Aplan-10-3619-Thy_vs_Aplan-Pooled-Tail-Ref	chr15	76297146	76297146	C	G	Oplah	c.3593G>C	p.Arg1198Pro	missense_variant	MODERATE	107	0	0.01	14	8	0.563	6.38565
Aplan-10-3619-Thy_vs_Aplan-Pooled-Tail-Ref	chr15	77735780	77735780	G	C	Apol9b	c.775G>C	p.Ala259Pro	missense_variant	MODERATE	219	0	0.005212	63	32	0.507	6.73857
Aplan-10-3619-Thy_vs_Aplan-Pooled-Tail-Ref	chr15	78349097	78349097	C	G	Csf2rb	c.2603C>G	p.Pro868Arg	missense_variant	MODERATE	109	0	0.012	26	12	0.458	6.15832
Aplan-10-3619-Thy_vs_Aplan-Pooled-Tail-Ref	chr15	79029170	79029170	C	G	H1f0	c.449C>G	p.Pro150Arg	missense_variant	MODERATE	114	0	0.009249	42	13	0.366	6.38386
Aplan-10-3619-Thy_vs_Aplan-Pooled-Tail-Ref	chr15	79255909	79255909	G	C	Slc16a8	c.-2102C>G		upstream_gene_variant	MODIFIER	249	0	0.00445	86	33	0.43	6.73194
Aplan-10-3619-Thy_vs_Aplan-Pooled-Tail-Ref	chr15	81695164	81695164	G	C	Chadl	c.263C>G	p.Thr88Arg	missense_variant	MODERATE	65	0	0.019	13	6	0.5	5.17516
Aplan-10-3619-Thy_vs_Aplan-Pooled-Tail-Ref	chr15	82072053	82072053	G	C	Mei1	c.283+48G>C		intron_variant	MODIFIER	127	0	0.008894	16	6	0.428	6.12501
Aplan-10-3619-Thy_vs_Aplan-Pooled-Tail-Ref	chr15	89369581	89369581	C	G	Sco2	c.*2101G>C		downstream_gene_variant	MODIFIER	158	0	0.007667	49	21	0.4	7.03222
Aplan-10-3619-Thy_vs_Aplan-Pooled-Tail-Ref	chr15	93259169	93259169	G	C	Gxylt1	c.400C>G	p.Arg134Gly	missense_variant	MODERATE	78	0	0.016	38	12	0.3	6.4049
Aplan-10-3619-Thy_vs_Aplan-Pooled-Tail-Ref	chr15	96361900	96361900	C	G	Arid2	c.940C>G	p.Arg314Gly	missense_variant	MODERATE	157	0	0.007348	50	20	0.404	6.26524
Aplan-10-3619-Thy_vs_Aplan-Pooled-Tail-Ref	chr15	98932016	98932016	G	C	Tuba1b	c.922C>G	p.Arg308Gly	missense_variant	MODERATE	145	0	0.008386	81	38	0.476	6.40623
Aplan-10-3619-Thy_vs_Aplan-Pooled-Tail-Ref	chr15	99101101	99101101	G	C	Dnajc22	c.166G>C	p.Val56Leu	missense_variant	MODERATE	212	1	0.00922	32	18	0.572	7.04778
Aplan-10-3619-Thy_vs_Aplan-Pooled-Tail-Ref	chr15	101029731	101029731	G	A	Scn8a	c.4090G>A	p.Glu1364Lys	missense_variant	MODERATE	156	0	0.008186	35	14	0.418	6.35192
Aplan-10-3619-Thy_vs_Aplan-Pooled-Tail-Ref	chr15	101813184	101813184	C	G	Krt2	c.1421G>C	p.Arg474Pro	missense_variant	MODERATE	133	0	0.008802	33	20	0.593	6.72283
Aplan-10-3619-Thy_vs_Aplan-Pooled-Tail-Ref	chr15	101892645	101892645	G	C	Krt76	c.215C>G	p.Ala72Gly	missense_variant	MODERATE	30	0	0.035	33	17	0.517	5.89617
Aplan-10-3619-Thy_vs_Aplan-Pooled-Tail-Ref	chr15	102144731	102144731	G	C	Igfbp6	c.184G>C	p.Gly62Arg	missense_variant	MODERATE	95	0	0.012	15	10	0.583	6.20561
Aplan-10-3619-Thy_vs_Aplan-Pooled-Tail-Ref	chr16	4137426	4137426	G	C	Crebbp	c.1267C>G	p.Arg423Gly	missense_variant	MODERATE	152	1	0.008267	43	26	0.556	6.17711
Aplan-10-3619-Thy_vs_Aplan-Pooled-Tail-Ref	chr16	8636179	8636179	G	C	Tmem186	c.217C>G	p.Arg73Gly	missense_variant	MODERATE	143	0	0.007891	31	8	0.28	6.35095
Aplan-10-3619-Thy_vs_Aplan-Pooled-Tail-Ref	chr16	11755299	11755299	C	G	Snx29	c.2430C>G	p.Asn810Lys	missense_variant	MODERATE	157	0	0.00871	25	15	0.524	6.12081
Aplan-10-3619-Thy_vs_Aplan-Pooled-Tail-Ref	chr16	17573973	17573973	C	A	Slc7a4	c.1596G>T	p.Gln532His	missense_variant	MODERATE	19	0	0.05	23	14	0.597	4.56091
Aplan-10-3619-Thy_vs_Aplan-Pooled-Tail-Ref	chr16	18403379	18403379	G	A	Arvcf	c.2296G>A	p.Ala766Thr	missense_variant	MODERATE	162	0	0.00779	18	6	0.438	6.36907
Aplan-10-3619-Thy_vs_Aplan-Pooled-Tail-Ref	chr16	18403445	18403445	G	C	Arvcf	c.2362G>C	p.Val788Leu	missense_variant	MODERATE	147	0	0.008059	23	11	0.474	6.83901
Aplan-10-3619-Thy_vs_Aplan-Pooled-Tail-Ref	chr16	18404482	18404482	G	C	Arvcf	c.2718G>C	p.Arg906Arg	synonymous_variant	LOW	210	0	0.006016	68	29	0.383	6.1253
Aplan-10-3619-Thy_vs_Aplan-Pooled-Tail-Ref	chr16	22038599	22038599	C	G	Senp2	c.1170C>G	p.Ser390Arg	missense_variant	MODERATE	167	0	0.007811	37	19	0.484	6.40304
Aplan-10-3619-Thy_vs_Aplan-Pooled-Tail-Ref	chr16	30582702	30582702	G	C	Lsg1	c.227-51C>G		intron_variant	MODIFIER	102	1	0.023	49	35	0.639	6.6593
Aplan-10-3619-Thy_vs_Aplan-Pooled-Tail-Ref	chr16	32679926	32679926	G	C	Tnk2	c.2056G>C	p.Ala686Pro	missense_variant	MODERATE	106	0	0.011	17	8	0.5	7.627
Aplan-10-3619-Thy_vs_Aplan-Pooled-Tail-Ref	chr16	33975779	33975779	C	G	Kalrn	c.8686G>C	p.Gly2896Arg	missense_variant	MODERATE	109	1	0.011	40	15	0.413	6.93844
Aplan-10-3619-Thy_vs_Aplan-Pooled-Tail-Ref	chr16	95715112	95715112	C	G	Ets2	c.735C>G	p.Thr245Thr	synonymous_variant	LOW	147	0	0.008067	51	17	0.372	6.33662
Aplan-10-3619-Thy_vs_Aplan-Pooled-Tail-Ref	chr17	3044074	3044074	G	C	CHR_START-Pisd-ps2	n.3044074G>C		intergenic_region	MODIFIER	52	0	0.022	13	6	0.429	4.68246
Aplan-10-3619-Thy_vs_Aplan-Pooled-Tail-Ref	chr17	5342477	5342477	C	G	Arid1b	c.6125C>G	p.Pro2042Arg	missense_variant	MODERATE	163	0	0.007146	29	12	0.416	7.13532
Aplan-10-3619-Thy_vs_Aplan-Pooled-Tail-Ref	chr17	6941735	6941735	G	C	Rsph3b	c.135C>G	p.Tyr45*	stop_gained	HIGH	190	0	0.006318	93	46	0.453	5.83457
Aplan-10-3619-Thy_vs_Aplan-Pooled-Tail-Ref	chr17	23734981	23734981	C	G	Pkmyt1	c.861C>G	p.Ile287Met	missense_variant	MODERATE	224	0	0.006005	46	22	0.487	6.5009
Aplan-10-3619-Thy_vs_Aplan-Pooled-Tail-Ref	chr17	24405288	24405288	C	G	Abca3	c.4208C>G	p.Ser1403Cys	missense_variant	MODERATE	94	0	0.011	33	20	0.613	6.22132
Aplan-10-3619-Thy_vs_Aplan-Pooled-Tail-Ref	chr17	24506759	24506759	G	C	Caskin1	c.4018G>C	p.Val1340Leu	missense_variant	MODERATE	65	1	0.018	13	6	0.462	4.36786
Aplan-10-3619-Thy_vs_Aplan-Pooled-Tail-Ref	chr17	27563949	27563949	G	C	AI413582	c.*2C>G		3_prime_UTR_variant	MODIFIER	105	0	0.011	24	12	0.473	6.37729
Aplan-10-3619-Thy_vs_Aplan-Pooled-Tail-Ref	chr17	27886947	27886947	G	C	Uhrf1bp1	c.2446G>C	p.Ala816Pro	missense_variant	MODERATE	222	0	0.005243	31	16	0.533	6.05767
Aplan-10-3619-Thy_vs_Aplan-Pooled-Tail-Ref	chr17	30527323	30527323	G	C	Btbd9	c.528C>G	p.Asp176Glu	missense_variant	MODERATE	174	0	0.007022	58	26	0.432	6.31877
Aplan-10-3619-Thy_vs_Aplan-Pooled-Tail-Ref	chr17	32158221	32158221	C	G	Notch3	c.795G>C	p.Pro265Pro	synonymous_variant	LOW	179	0	0.006798	37	15	0.437	6.11424
Aplan-10-3619-Thy_vs_Aplan-Pooled-Tail-Ref	chr17	34114361	34114361	G	C	Brd2	c.1315C>G	p.Arg439Gly	missense_variant	MODERATE	107	0	0.011	63	25	0.423	6.57821
Aplan-10-3619-Thy_vs_Aplan-Pooled-Tail-Ref	chr17	34600716	34600716	G	C	Ager	c.1122G>C	p.Pro374Pro	synonymous_variant	LOW	84	0	0.014	19	8	0.444	6.49772
Aplan-10-3619-Thy_vs_Aplan-Pooled-Tail-Ref	chr17	34810574	34810574	G	C	C4a	c.4581C>G	p.Gly1527Gly	synonymous_variant	LOW	49	0	0.023	22	10	0.5	5.85373
Aplan-10-3619-Thy_vs_Aplan-Pooled-Tail-Ref	chr17	35246954	35246954	C	G	Ddx39b	c.450C>G	p.Gly150Gly	synonymous_variant	LOW	84	0	0.015	34	15	0.419	6.03288
Aplan-10-3619-Thy_vs_Aplan-Pooled-Tail-Ref	chr17	56131552	56131552	C	G	Sema6b	c.343G>C	p.Asp115His	missense_variant	MODERATE	147	1	0.008114	44	19	0.461	6.67
Aplan-10-3619-Thy_vs_Aplan-Pooled-Tail-Ref	chr17	57081119	57081119	C	G	Tubb4a	c.906G>C	p.Ala302Ala	synonymous_variant	LOW	111	0	0.011	38	21	0.543	6.8048
Aplan-10-3619-Thy_vs_Aplan-Pooled-Tail-Ref	chr17	84252361	84252361	C	G	Thada	c.4387G>C	p.Asp1463His	missense_variant	MODERATE	67	0	0.019	23	16	0.632	6.57859
Aplan-10-3619-Thy_vs_Aplan-Pooled-Tail-Ref	chr17	84692028	84692028	G	C	Abcg8	c.554G>C	p.Arg185Pro	missense_variant	MODERATE	52	0	0.021	24	9	0.391	5.03727
Aplan-10-3619-Thy_vs_Aplan-Pooled-Tail-Ref	chr17	93202335	93202335	C	G	Adcyap1	c.213C>G	p.Tyr71*	stop_gained	HIGH	50	0	0.021	23	6	0.286	3.22694
Aplan-10-3619-Thy_vs_Aplan-Pooled-Tail-Ref	chr18	31789160	31789160	C	G	Polr2d	c.-12C>G		5_prime_UTR_variant	MODIFIER	115	0	0.011	15	7	0.545	7.21527
Aplan-10-3619-Thy_vs_Aplan-Pooled-Tail-Ref	chr18	36947724	36947724	C	T	Pcdha3	c.1518C>T	p.Ser506Ser	synonymous_variant	LOW	280	0	0.004282	134	58	0.478	5.84314
Aplan-10-3619-Thy_vs_Aplan-Pooled-Tail-Ref	chr18	37663990	37663990	C	G	Pcdhga1	c.2046C>G	p.Ala682Ala	synonymous_variant	LOW	222	0	0.005141	58	21	0.362	6.65038
Aplan-10-3619-Thy_vs_Aplan-Pooled-Tail-Ref	chr18	84948038	84948038	C	G	Timm21	c.515G>C	p.Arg172Pro	missense_variant	MODERATE	169	0	0.007123	79	33	0.429	6.6023
Aplan-10-3619-Thy_vs_Aplan-Pooled-Tail-Ref	chr19	5082347	5082347	C	G	Tmem151a	c.830G>C	p.Arg277Pro	missense_variant	MODERATE	118	1	0.009514	14	10	0.616	6.62779
Aplan-10-3619-Thy_vs_Aplan-Pooled-Tail-Ref	chr19	5307108	5307108	G	C	Gal3st3	c.510G>C	p.Pro170Pro	synonymous_variant	LOW	181	1	0.006979	20	8	0.437	7.72896
Aplan-10-3619-Thy_vs_Aplan-Pooled-Tail-Ref	chr19	5465016	5465016	C	G	Fibp	c.*22C>G		3_prime_UTR_variant	MODIFIER	303	0	0.003977	41	22	0.549	6.33486
Aplan-10-3619-Thy_vs_Aplan-Pooled-Tail-Ref	chr19	7096090	7096090	C	G	Flrt1	c.1091G>C	p.Arg364Pro	missense_variant	MODERATE	65	0	0.018	12	6	0.461	5.40925
Aplan-10-3619-Thy_vs_Aplan-Pooled-Tail-Ref	chr19	27239866	27239866	C	G	Vldlr	c.1208C>G	p.Pro403Arg	missense_variant	MODERATE	134	0	0.008838	60	23	0.377	6.08993
Aplan-10-3619-Thy_vs_Aplan-Pooled-Tail-Ref	chr19	34234028	34234028	G	C	Stambpl1	c.488G>C	p.Arg163Pro	missense_variant	MODERATE	157	0	0.007261	50	21	0.41	6.87765
Aplan-10-3619-Thy_vs_Aplan-Pooled-Tail-Ref	chr19	42564226	42564226	T	A	R3hcc1l	c.1661T>A	p.Val554Glu	missense_variant	MODERATE	107	0	0.01	63	35	0.528	6.10223
Aplan-10-3619-Thy_vs_Aplan-Pooled-Tail-Ref	chr19	43837464	43837464	C	G	Abcc2	c.4539C>G	p.Tyr1513*	stop_gained	HIGH	90	0	0.014	41	15	0.364	6.77099
Aplan-10-3619-Thy_vs_Aplan-Pooled-Tail-Ref	chr19	47756110	47756110	C	G	Cfap43	c.3603G>C	p.Ala1201Ala	synonymous_variant	LOW	102	0	0.013	47	25	0.5	6.20119
Aplan-10-3619-Thy_vs_Aplan-Pooled-Tail-Ref	chrX	12039046	12039046	G	C	Bcor	c.4854C>G	p.Tyr1618*	stop_gained	HIGH	155	0	0.007687	52	12	0.238	5.98933
Aplan-10-3619-Thy_vs_Aplan-Pooled-Tail-Ref	chrX	20668727	20668727	C	G	Uba1	c.333C>G	p.Asp111Glu	missense_variant	MODERATE	232	1	0.005206	92	49	0.514	6.23267
Aplan-10-3619-Thy_vs_Aplan-Pooled-Tail-Ref	chrX	38549623	38549623	C	G	Cul4b	c.1363G>C	p.Ala455Pro	missense_variant	MODERATE	132	0	0.009398	45	21	0.513	6.63227
Aplan-10-3619-Thy_vs_Aplan-Pooled-Tail-Ref	chrX	44789442	44789442	C	G	Dcaf12l1	c.478G>C	p.Val160Leu	missense_variant	MODERATE	97	0	0.012	32	8	0.259	5.1611
Aplan-10-3619-Thy_vs_Aplan-Pooled-Tail-Ref	chrX	48497303	48497303	T	C	Aifm1	c.471+31A>G		intron_variant	MODIFIER	175	0	0.006636	54	9	0.2	5.88388
Aplan-10-3619-Thy_vs_Aplan-Pooled-Tail-Ref	chrX	101542479	101542479	C	G	Taf1	c.790C>G	p.Arg264Gly	missense_variant	MODERATE	71	0	0.017	25	14	0.473	6.2552
Aplan-10-3619-Thy_vs_Aplan-Pooled-Tail-Ref	chrX	152026337	152026337	C	G	Smc1a	c.511C>G	p.Arg171Gly	missense_variant	MODERATE	88	0	0.012	40	25	0.588	6.51402
Aplan-10-3620-Thy_vs_Aplan-10th-Exp-NHD13-Donor-plus-Pooled-Tail-Ref	chr1	19104553	19104553	G	C	Tfap2d	c.229G>C	p.Glu77Gln	missense_variant	MODERATE	438	0	0.002734	65	14	0.237	6.34953
Aplan-10-3620-Thy_vs_Aplan-10th-Exp-NHD13-Donor-plus-Pooled-Tail-Ref	chr1	21457439	21457439	C	G	Kcnq5	c.1493G>C	p.Arg498Pro	missense_variant	MODERATE	234	3	0.006847	26	5	0.273	3.50535
Aplan-10-3620-Thy_vs_Aplan-10th-Exp-NHD13-Donor-plus-Pooled-Tail-Ref	chr1	36812253	36812253	G	C	Tmem131	c.2915C>G	p.Thr972Arg	missense_variant	MODERATE	337	1	0.007358	90	45	0.513	6.18453
Aplan-10-3620-Thy_vs_Aplan-10th-Exp-NHD13-Donor-plus-Pooled-Tail-Ref	chr1	55171817	55171817	C	G	Rftn2	c.1496G>C	p.Cys499Ser	missense_variant	MODERATE	198	0	0.006014	50	12	0.25	7.05961
Aplan-10-3620-Thy_vs_Aplan-10th-Exp-NHD13-Donor-plus-Pooled-Tail-Ref	chr1	58713703	58713703	G	C	Cflar	c.-132+2111G>C		intron_variant	MODIFIER	368	2	0.006512	84	29	0.339	6.43257
Aplan-10-3620-Thy_vs_Aplan-10th-Exp-NHD13-Donor-plus-Pooled-Tail-Ref	chr1	59484660	59484660	G	C	Fzd7	c.1701G>C	p.Lys567Asn	missense_variant	MODERATE	201	0	0.005815	31	7	0.257	6.39642
Aplan-10-3620-Thy_vs_Aplan-10th-Exp-NHD13-Donor-plus-Pooled-Tail-Ref	chr1	71288705	71288705	G	C	Abca12	c.4215C>G	p.Tyr1405*	stop_gained	HIGH	103	0	0.012	32	5	0.222	3.23595
Aplan-10-3620-Thy_vs_Aplan-10th-Exp-NHD13-Donor-plus-Pooled-Tail-Ref	chr1	72534962	72534962	G	C	44989	c.176C>G	p.Ala59Gly	missense_variant	MODERATE	112	0	0.011	16	5	0.333	4.78225
Aplan-10-3620-Thy_vs_Aplan-10th-Exp-NHD13-Donor-plus-Pooled-Tail-Ref	chr1	74278961	74278961	G	C	Gpbar1	c.362G>C	p.Gly121Ala	missense_variant	MODERATE	273	0	0.004219	41	13	0.333	6.96768
Aplan-10-3620-Thy_vs_Aplan-10th-Exp-NHD13-Donor-plus-Pooled-Tail-Ref	chr1	74381761	74381761	G	C	Slc11a1	c.812G>C	p.Arg271Pro	missense_variant	MODERATE	205	0	0.005982	43	7	0.21	5.51345
Aplan-10-3620-Thy_vs_Aplan-10th-Exp-NHD13-Donor-plus-Pooled-Tail-Ref	chr1	75239599	75239599	C	G	Dnajb2	c.321C>G	p.Phe107Leu	missense_variant	MODERATE	218	0	0.005835	31	13	0.393	7.32826
Aplan-10-3620-Thy_vs_Aplan-10th-Exp-NHD13-Donor-plus-Pooled-Tail-Ref	chr1	75384660	75384660	G	C	Speg	c.399G>C	p.Ser133Ser	synonymous_variant	LOW	261	0	0.005131	35	15	0.407	6.52576
Aplan-10-3620-Thy_vs_Aplan-10th-Exp-NHD13-Donor-plus-Pooled-Tail-Ref	chr1	87068741	87068741	C	G	Dis3l2-Alppl2	n.87068741C>G		intergenic_region	MODIFIER	227	0	0.005488	33	6	0.2	5.5629
Aplan-10-3620-Thy_vs_Aplan-10th-Exp-NHD13-Donor-plus-Pooled-Tail-Ref	chr1	88205133	88205133	G	C	Dnajb3	c.546C>G	p.Gly182Gly	synonymous_variant	LOW	268	1	0.004233	76	30	0.378	6.1211
Aplan-10-3620-Thy_vs_Aplan-10th-Exp-NHD13-Donor-plus-Pooled-Tail-Ref	chr1	90807978	90807978	C	G	Col6a3	c.3769G>C	p.Glu1257Gln	missense_variant	MODERATE	153	0	0.007632	46	10	0.219	6.71869
Aplan-10-3620-Thy_vs_Aplan-10th-Exp-NHD13-Donor-plus-Pooled-Tail-Ref	chr1	91153250	91153250	G	C	Rbm44	c.1159G>C	p.Val387Leu	missense_variant	MODERATE	160	0	0.00693	49	13	0.292	7.0254
Aplan-10-3620-Thy_vs_Aplan-10th-Exp-NHD13-Donor-plus-Pooled-Tail-Ref	chr1	91520846	91520846	G	C	Traf3ip1	c.1251-38G>C		intron_variant	MODIFIER	90	0	0.012	30	9	0.321	5.86384
Aplan-10-3620-Thy_vs_Aplan-10th-Exp-NHD13-Donor-plus-Pooled-Tail-Ref	chr1	118836368	118836368	C	G	Gli2	c.4052G>C	p.Arg1351Pro	missense_variant	MODERATE	248	0	0.004634	43	15	0.317	6.71662
Aplan-10-3620-Thy_vs_Aplan-10th-Exp-NHD13-Donor-plus-Pooled-Tail-Ref	chr1	131977954	131977954	G	C	Slc45a3	c.714G>C	p.Ser238Ser	synonymous_variant	LOW	224	0	0.005302	33	19	0.516	7.12645
Aplan-10-3620-Thy_vs_Aplan-10th-Exp-NHD13-Donor-plus-Pooled-Tail-Ref	chr1	132303719	132303719	C	G	Klhdc8a	c.758-10C>G		intron_variant	MODIFIER	185	1	0.012	44	15	0.335	6.18176
Aplan-10-3620-Thy_vs_Aplan-10th-Exp-NHD13-Donor-plus-Pooled-Tail-Ref	chr1	132991756	132991756	G	C	Mdm4	c.1373C>G	p.Thr458Arg	missense_variant	MODERATE	502	0	0.002593	85	18	0.202	6.43183
Aplan-10-3620-Thy_vs_Aplan-10th-Exp-NHD13-Donor-plus-Pooled-Tail-Ref	chr1	135452231	135452231	C	G	Nav1	c.4732G>C	p.Gly1578Arg	missense_variant	MODERATE	94	0	0.012	22	6	0.285	4.59953
Aplan-10-3620-Thy_vs_Aplan-10th-Exp-NHD13-Donor-plus-Pooled-Tail-Ref	chr1	135828061	135828061	G	C	Lad1	c.1059+15G>C		intron_variant	MODIFIER	292	1	0.004393	51	26	0.531	6.60813
Aplan-10-3620-Thy_vs_Aplan-10th-Exp-NHD13-Donor-plus-Pooled-Tail-Ref	chr1	139423301	139423301	C	G	Zbtb41	c.151C>G	p.Arg51Gly	missense_variant	MODERATE	288	0	0.004101	103	17	0.204	7.11888
Aplan-10-3620-Thy_vs_Aplan-10th-Exp-NHD13-Donor-plus-Pooled-Tail-Ref	chr1	150582290	150582290	G	C	Hmcn1	c.15744C>G	p.Arg5248Arg	synonymous_variant	LOW	218	0	0.005779	69	17	0.264	6.58039
Aplan-10-3620-Thy_vs_Aplan-10th-Exp-NHD13-Donor-plus-Pooled-Tail-Ref	chr1	153255234	153255234	G	C	Lamc1	c.970C>G	p.Arg324Gly	missense_variant	MODERATE	144	2	0.00853	43	9	0.242	4.47443
Aplan-10-3620-Thy_vs_Aplan-10th-Exp-NHD13-Donor-plus-Pooled-Tail-Ref	chr1	153844136	153844136	C	G	Rgsl1	c.-22G>C		5_prime_UTR_premature_start_codon_gain_variant	LOW	107	0	0.011	22	5	0.273	4.01919
Aplan-10-3620-Thy_vs_Aplan-10th-Exp-NHD13-Donor-plus-Pooled-Tail-Ref	chr1	155527108	155527108	C	G	Gm5532	n.4G>C		non_coding_transcript_exon_variant	MODIFIER	187	0	0.006352	70	17	0.271	7.06832
Aplan-10-3620-Thy_vs_Aplan-10th-Exp-NHD13-Donor-plus-Pooled-Tail-Ref	chr1	156439733	156439733	C	G	Soat1	c.879G>C	p.Ala293Ala	synonymous_variant	LOW	297	0	0.004204	99	25	0.243	6.39341
Aplan-10-3620-Thy_vs_Aplan-10th-Exp-NHD13-Donor-plus-Pooled-Tail-Ref	chr1	156656625	156656625	C	G	Tor3a	c.783-29G>C		intron_variant	MODIFIER	192	0	0.006206	29	5	0.2	4.54834
Aplan-10-3620-Thy_vs_Aplan-10th-Exp-NHD13-Donor-plus-Pooled-Tail-Ref	chr1	157538289	157538289	G	C	Sec16b	c.1287G>C	p.Thr429Thr	synonymous_variant	LOW	80	0	0.015	24	8	0.304	5.54434
Aplan-10-3620-Thy_vs_Aplan-10th-Exp-NHD13-Donor-plus-Pooled-Tail-Ref	chr1	159328693	159328693	C	G	Rfwd2	c.2070C>G	p.Asp690Glu	missense_variant	MODERATE	341	0	0.003658	102	19	0.208	6.71252
Aplan-10-3620-Thy_vs_Aplan-10th-Exp-NHD13-Donor-plus-Pooled-Tail-Ref	chr1	160993431	160993431	C	G	Serpinc1	c.447C>G	p.Ser149Ser	synonymous_variant	LOW	522	0	0.002488	64	13	0.2	6.18619
Aplan-10-3620-Thy_vs_Aplan-10th-Exp-NHD13-Donor-plus-Pooled-Tail-Ref	chr1	161163283	161163283	C	G	Ankrd45	c.707C>G	p.Ala236Gly	missense_variant	MODERATE	220	0	0.005131	85	34	0.399	6.50999
Aplan-10-3620-Thy_vs_Aplan-10th-Exp-NHD13-Donor-plus-Pooled-Tail-Ref	chr1	166127098	166127098	G	C	Dusp27	c.82C>G	p.Arg28Gly	missense_variant	MODERATE	347	0	0.003796	57	20	0.383	5.96626
Aplan-10-3620-Thy_vs_Aplan-10th-Exp-NHD13-Donor-plus-Pooled-Tail-Ref	chr1	171285276	171285276	G	C	Usp21	c.760C>G	p.Arg254Gly	missense_variant	MODERATE	107	0	0.011	28	10	0.347	7.47725
Aplan-10-3620-Thy_vs_Aplan-10th-Exp-NHD13-Donor-plus-Pooled-Tail-Ref	chr1	172287302	172287302	G	C	Atp1a2	c.915C>G	p.Phe305Leu	missense_variant	MODERATE	75	0	0.015	31	14	0.4	6.82727
Aplan-10-3620-Thy_vs_Aplan-10th-Exp-NHD13-Donor-plus-Pooled-Tail-Ref	chr1	172495203	172495203	C	G	Igsf9	c.1733C>G	p.Ala578Gly	missense_variant	MODERATE	332	2	0.00628	49	11	0.251	6.95772
Aplan-10-3620-Thy_vs_Aplan-10th-Exp-NHD13-Donor-plus-Pooled-Tail-Ref	chr1	180162147	180162147	G	C	Cdc42bpa	c.5180G>C	p.Arg1727Pro	missense_variant	MODERATE	263	0	0.004558	82	21	0.239	6.65845
Aplan-10-3620-Thy_vs_Aplan-10th-Exp-NHD13-Donor-plus-Pooled-Tail-Ref	chr1	180333264	180333264	C	G	Itpkb	c.954C>G	p.Leu318Leu	synonymous_variant	LOW	167	0	0.007071	45	14	0.287	6.82394
Aplan-10-3620-Thy_vs_Aplan-10th-Exp-NHD13-Donor-plus-Pooled-Tail-Ref	chr1	180722006	180722006	C	G	Acbd3	c.-4096C>G		upstream_gene_variant	MODIFIER	680	0	0.001806	137	29	0.223	6.64428
Aplan-10-3620-Thy_vs_Aplan-10th-Exp-NHD13-Donor-plus-Pooled-Tail-Ref	chr1	182597717	182597717	G	C	Capn8	c.560+9G>C		intron_variant	MODIFIER	121	0	0.009498	32	17	0.516	6.69787
Aplan-10-3620-Thy_vs_Aplan-10th-Exp-NHD13-Donor-plus-Pooled-Tail-Ref	chr1	182975140	182975140	G	C	Tlr5	c.2008G>C	p.Val670Leu	missense_variant	MODERATE	337	0	0.003395	84	27	0.34	6.33213
Aplan-10-3620-Thy_vs_Aplan-10th-Exp-NHD13-Donor-plus-Pooled-Tail-Ref	chr1	189659528	189659528	C	G	Cenpf	c.2106G>C	p.Ser702Ser	synonymous_variant	LOW	405	0	0.002837	152	30	0.202	6.1954
Aplan-10-3620-Thy_vs_Aplan-10th-Exp-NHD13-Donor-plus-Pooled-Tail-Ref	chr1	193348412	193348412	G	A	Camk1g	c.988C>T	p.Arg330Cys	missense_variant	MODERATE	146	0	0.008138	46	12	0.263	6.26879
Aplan-10-3620-Thy_vs_Aplan-10th-Exp-NHD13-Donor-plus-Pooled-Tail-Ref	chr2	10090220	10090220	C	G	Itih2	c.*4534G>C		downstream_gene_variant	MODIFIER	213	0	0.005598	68	18	0.254	5.98695
Aplan-10-3620-Thy_vs_Aplan-10th-Exp-NHD13-Donor-plus-Pooled-Tail-Ref	chr2	23192581	23192581	C	G	Yme1l1	c.1564+19C>G		intron_variant	MODIFIER	167	0	0.007368	62	13	0.241	6.1658
Aplan-10-3620-Thy_vs_Aplan-10th-Exp-NHD13-Donor-plus-Pooled-Tail-Ref	chr2	24958200	24958200	C	G	Zmynd19	c.524C>G	p.Thr175Arg	missense_variant	MODERATE	260	0	0.004834	74	14	0.226	6.38756
Aplan-10-3620-Thy_vs_Aplan-10th-Exp-NHD13-Donor-plus-Pooled-Tail-Ref	chr2	24980745	24980745	C	G	Pnpla7	c.226C>G	p.Arg76Gly	missense_variant	MODERATE	117	0	0.01	26	7	0.25	5.50206
Aplan-10-3620-Thy_vs_Aplan-10th-Exp-NHD13-Donor-plus-Pooled-Tail-Ref	chr2	25536752	25536752	C	G	Traf2	c.311G>C	p.Arg104Pro	missense_variant	MODERATE	172	0	0.006765	43	11	0.291	6.41698
Aplan-10-3620-Thy_vs_Aplan-10th-Exp-NHD13-Donor-plus-Pooled-Tail-Ref	chr2	25778125	25778125	G	C	Lcn11	c.294G>C	p.Gln98His	missense_variant	MODERATE	206	0	0.005891	72	17	0.221	6.12354
Aplan-10-3620-Thy_vs_Aplan-10th-Exp-NHD13-Donor-plus-Pooled-Tail-Ref	chr2	26090386	26090386	C	G	Nacc2	c.37G>C	p.Gly13Arg	missense_variant	MODERATE	167	1	0.007814	30	9	0.344	6.90036
Aplan-10-3620-Thy_vs_Aplan-10th-Exp-NHD13-Donor-plus-Pooled-Tail-Ref	chr2	26357859	26357859	C	G	Card9	c.479G>C	p.Arg160Pro	missense_variant	MODERATE	171	0	0.006716	34	9	0.207	7.44892
Aplan-10-3620-Thy_vs_Aplan-10th-Exp-NHD13-Donor-plus-Pooled-Tail-Ref	chr2	26435975	26435975	C	G	Sec16a	c.3689G>C	p.Arg1230Pro	missense_variant	MODERATE	145	0	0.007516	48	9	0.222	5.70347
Aplan-10-3620-Thy_vs_Aplan-10th-Exp-NHD13-Donor-plus-Pooled-Tail-Ref	chr2	26954523	26954523	C	T	Rexo4	c.1253G>A	p.Arg418Gln	missense_variant	MODERATE	174	0	0.007471	25	5	0.208	4.66775
Aplan-10-3620-Thy_vs_Aplan-10th-Exp-NHD13-Donor-plus-Pooled-Tail-Ref	chr2	27018485	27018485	G	C	Cacfd1	c.425+5G>C		splice_region_variant&intron_variant	LOW	115	0	0.01	23	6	0.261	4.93
Aplan-10-3620-Thy_vs_Aplan-10th-Exp-NHD13-Donor-plus-Pooled-Tail-Ref	chr2	27103062	27103062	G	C	Adamtsl2	c.2107-4G>C		splice_region_variant&intron_variant	LOW	185	1	0.006676	43	13	0.335	6.09865
Aplan-10-3620-Thy_vs_Aplan-10th-Exp-NHD13-Donor-plus-Pooled-Tail-Ref	chr2	27244341	27244341	G	T	Sardh	c.162C>A	p.Ser54Ser	synonymous_variant	LOW	222	0	0.005101	27	8	0.26	6.2151
Aplan-10-3620-Thy_vs_Aplan-10th-Exp-NHD13-Donor-plus-Pooled-Tail-Ref	chr2	27518734	27518734	C	G	Wdr5	c.23C>G	p.Pro8Arg	missense_variant	MODERATE	156	0	0.007894	28	7	0.24	6.02777
Aplan-10-3620-Thy_vs_Aplan-10th-Exp-NHD13-Donor-plus-Pooled-Tail-Ref	chr2	29872856	29872856	C	G	Cercam	c.601C>G	p.Arg201Gly	missense_variant	MODERATE	210	0	0.005585	41	8	0.205	6.56271
Aplan-10-3620-Thy_vs_Aplan-10th-Exp-NHD13-Donor-plus-Pooled-Tail-Ref	chr2	32096021	32096021	C	G	Plpp7	c.210C>G	p.Cys70Trp	missense_variant	MODERATE	121	0	0.008963	18	5	0.316	4.67143
Aplan-10-3620-Thy_vs_Aplan-10th-Exp-NHD13-Donor-plus-Pooled-Tail-Ref	chr2	32109985	32109985	C	G	Plpp7	c.*12C>G		3_prime_UTR_variant	MODIFIER	114	0	0.011	23	6	0.273	4.9107
Aplan-10-3620-Thy_vs_Aplan-10th-Exp-NHD13-Donor-plus-Pooled-Tail-Ref	chr2	32214909	32214909	C	G	Prrc2b	c.4398C>G	p.Cys1466Trp	missense_variant	MODERATE	115	0	0.01	21	6	0.333	5.16083
Aplan-10-3620-Thy_vs_Aplan-10th-Exp-NHD13-Donor-plus-Pooled-Tail-Ref	chr2	32340041	32340041	G	C	Dnm1	c.469C>G	p.Arg157Gly	missense_variant	MODERATE	106	0	0.012	24	11	0.435	7.1403
Aplan-10-3620-Thy_vs_Aplan-10th-Exp-NHD13-Donor-plus-Pooled-Tail-Ref	chr2	32631238	32631238	G	C	Ak1	c.372+46G>C		intron_variant	MODIFIER	122	0	0.009547	29	8	0.24	6.11172
Aplan-10-3620-Thy_vs_Aplan-10th-Exp-NHD13-Donor-plus-Pooled-Tail-Ref	chr2	32633381	32633381	C	G	Ak1	c.460C>G	p.Arg154Gly	missense_variant	MODERATE	152	0	0.007274	58	12	0.24	7.09698
Aplan-10-3620-Thy_vs_Aplan-10th-Exp-NHD13-Donor-plus-Pooled-Tail-Ref	chr2	32692711	32692711	C	G	Fpgs	c.149G>C	p.Arg50Pro	missense_variant	MODERATE	116	0	0.009646	31	6	0.241	4.23465
Aplan-10-3620-Thy_vs_Aplan-10th-Exp-NHD13-Donor-plus-Pooled-Tail-Ref	chr2	35302611	35302611	C	G	Gsn	c.1684C>G	p.Arg562Gly	missense_variant	MODERATE	109	0	0.011	24	6	0.261	4.70708
Aplan-10-3620-Thy_vs_Aplan-10th-Exp-NHD13-Donor-plus-Pooled-Tail-Ref	chr2	38710597	38710597	G	C	Nr5a1	c.103-46C>G		intron_variant	MODIFIER	158	0	0.00773	17	6	0.353	6.47069
Aplan-10-3620-Thy_vs_Aplan-10th-Exp-NHD13-Donor-plus-Pooled-Tail-Ref	chr2	52216277	52216277	C	G	Neb	c.13328G>C	p.Arg4443Pro	missense_variant	MODERATE	412	1	0.003154	143	31	0.22	5.94455
Aplan-10-3620-Thy_vs_Aplan-10th-Exp-NHD13-Donor-plus-Pooled-Tail-Ref	chr2	59308256	59308256	C	G	Pkp4	c.849C>G	p.Ala283Ala	synonymous_variant	LOW	276	0	0.003984	72	20	0.272	7.00261
Aplan-10-3620-Thy_vs_Aplan-10th-Exp-NHD13-Donor-plus-Pooled-Tail-Ref	chr2	71509761	71509761	C	G	Metap1d	c.219C>G	p.Tyr73*	stop_gained	HIGH	171	0	0.007268	41	8	0.237	5.9669
Aplan-10-3620-Thy_vs_Aplan-10th-Exp-NHD13-Donor-plus-Pooled-Tail-Ref	chr2	76740022	76740022	C	G	Ttn	c.75288G>C	p.Thr25096Thr	synonymous_variant	LOW	241	2	0.009705	76	18	0.229	6.06747
Aplan-10-3620-Thy_vs_Aplan-10th-Exp-NHD13-Donor-plus-Pooled-Tail-Ref	chr2	76914850	76914850	C	G	Ttn	c.10378+6701G>C		intron_variant	MODIFIER	268	0	0.004091	102	21	0.239	6.63672
Aplan-10-3620-Thy_vs_Aplan-10th-Exp-NHD13-Donor-plus-Pooled-Tail-Ref	chr2	85663829	85663829	C	G	Olfr154	c.604G>C	p.Val202Leu	missense_variant	MODERATE	429	0	0.00268	167	35	0.222	6.51003
Aplan-10-3620-Thy_vs_Aplan-10th-Exp-NHD13-Donor-plus-Pooled-Tail-Ref	chr2	87092673	87092673	G	C	Olfr1109	c.723C>G	p.Cys241Trp	missense_variant	MODERATE	320	0	0.003561	154	32	0.214	6.39563
Aplan-10-3620-Thy_vs_Aplan-10th-Exp-NHD13-Donor-plus-Pooled-Tail-Ref	chr2	90459613	90459613	C	G	Ptprj	c.2020G>C	p.Val674Leu	missense_variant	MODERATE	190	0	0.006504	54	12	0.225	6.58109
Aplan-10-3620-Thy_vs_Aplan-10th-Exp-NHD13-Donor-plus-Pooled-Tail-Ref	chr2	91143672	91143672	G	C	Madd	c.4323C>G	p.Cys1441Trp	missense_variant	MODERATE	156	0	0.007781	43	10	0.21	7.04626
Aplan-10-3620-Thy_vs_Aplan-10th-Exp-NHD13-Donor-plus-Pooled-Tail-Ref	chr2	102069984	102069984	G	C	Ldlrad3	c.268C>G	p.Arg90Gly	missense_variant	MODERATE	90	0	0.013	23	14	0.578	6.22233
Aplan-10-3620-Thy_vs_Aplan-10th-Exp-NHD13-Donor-plus-Pooled-Tail-Ref	chr2	102766950	102766950	C	G	Slc1a2	c.1301C>G	p.Ala434Gly	missense_variant	MODERATE	215	0	0.005913	32	6	0.203	5.51506
Aplan-10-3620-Thy_vs_Aplan-10th-Exp-NHD13-Donor-plus-Pooled-Tail-Ref	chr2	108875005	108875005	C	G	Kcna4-Mettl15	n.108875005C>G		intergenic_region	MODIFIER	246	0	0.004502	68	16	0.225	6.55456
Aplan-10-3620-Thy_vs_Aplan-10th-Exp-NHD13-Donor-plus-Pooled-Tail-Ref	chr2	118792087	118792087	C	G	Disp2	c.3299C>G	p.Ala1100Gly	missense_variant	MODERATE	243	0	0.004731	40	8	0.231	7.07946
Aplan-10-3620-Thy_vs_Aplan-10th-Exp-NHD13-Donor-plus-Pooled-Tail-Ref	chr2	119071985	119071985	C	G	Casc5	c.4166C>G	p.Thr1389Ser	missense_variant	MODERATE	266	0	0.004298	104	24	0.224	5.97713
Aplan-10-3620-Thy_vs_Aplan-10th-Exp-NHD13-Donor-plus-Pooled-Tail-Ref	chr2	119752168	119752168	C	G	Itpka	c.*1301C>G		downstream_gene_variant	MODIFIER	171	0	0.006909	35	8	0.233	6.47393
Aplan-10-3620-Thy_vs_Aplan-10th-Exp-NHD13-Donor-plus-Pooled-Tail-Ref	chr2	120495950	120495950	G	C	Capn3	c.1622G>C	p.Arg541Pro	missense_variant	MODERATE	212	0	0.005951	40	9	0.212	7.55323
Aplan-10-3620-Thy_vs_Aplan-10th-Exp-NHD13-Donor-plus-Pooled-Tail-Ref	chr2	120510523	120510523	G	C	Zfp106	c.5574C>G	p.Cys1858Trp	missense_variant	MODERATE	137	0	0.008896	36	7	0.2	4.98894
Aplan-10-3620-Thy_vs_Aplan-10th-Exp-NHD13-Donor-plus-Pooled-Tail-Ref	chr2	122147724	122147724	C	G	B2m	c.-14C>G		5_prime_UTR_variant	MODIFIER	451	0	0.002748	39	8	0.2	7.04611
Aplan-10-3620-Thy_vs_Aplan-10th-Exp-NHD13-Donor-plus-Pooled-Tail-Ref	chr2	122595525	122595525	C	G	Gatm	c.1244G>C	p.Arg415Pro	missense_variant	MODERATE	103	0	0.012	25	6	0.273	4.48607
Aplan-10-3620-Thy_vs_Aplan-10th-Exp-NHD13-Donor-plus-Pooled-Tail-Ref	chr2	122785042	122785042	G	C	Sqrdl	c.82G>C	p.Gly28Arg	missense_variant	MODERATE	73	0	0.018	23	5	0.222	3.25924
Aplan-10-3620-Thy_vs_Aplan-10th-Exp-NHD13-Donor-plus-Pooled-Tail-Ref	chr2	129038425	129038425	C	G	Zc3h6-Ttl	n.129038425C>G		intergenic_region	MODIFIER	170	0	0.006584	58	13	0.259	6.51785
Aplan-10-3620-Thy_vs_Aplan-10th-Exp-NHD13-Donor-plus-Pooled-Tail-Ref	chr2	132002942	132002942	G	C	Rassf2	c.579C>G	p.Val193Val	synonymous_variant	LOW	298	0	0.004212	49	15	0.335	6.86407
Aplan-10-3620-Thy_vs_Aplan-10th-Exp-NHD13-Donor-plus-Pooled-Tail-Ref	chr2	147068789	147068789	C	T	Xrn2	c.2585-3C>T		splice_region_variant&intron_variant	LOW	221	0	0.005705	59	11	0.213	6.07997
Aplan-10-3620-Thy_vs_Aplan-10th-Exp-NHD13-Donor-plus-Pooled-Tail-Ref	chr2	147187733	147187733	C	G	Nkx2-2	c.-1715G>C		upstream_gene_variant	MODIFIER	285	1	0.004729	99	17	0.202	6.59665
Aplan-10-3620-Thy_vs_Aplan-10th-Exp-NHD13-Donor-plus-Pooled-Tail-Ref	chr2	149830549	149830549	G	C	Syndig1	c.-68947G>C		upstream_gene_variant	MODIFIER	121	0	0.009542	16	6	0.357	6.01127
Aplan-10-3620-Thy_vs_Aplan-10th-Exp-NHD13-Donor-plus-Pooled-Tail-Ref	chr2	152623053	152623053	C	G	Defb25	c.-26G>C		5_prime_UTR_variant	MODIFIER	120	0	0.011	54	14	0.23	6.05978
Aplan-10-3620-Thy_vs_Aplan-10th-Exp-NHD13-Donor-plus-Pooled-Tail-Ref	chr2	153393486	153393486	C	G	Asxl1	c.703C>G	p.Arg235Gly	missense_variant	MODERATE	156	0	0.00714	31	7	0.25	5.73123
Aplan-10-3620-Thy_vs_Aplan-10th-Exp-NHD13-Donor-plus-Pooled-Tail-Ref	chr2	153420585	153420585	C	G	Nol4l	c.1066G>C	p.Gly356Arg	missense_variant	MODERATE	157	0	0.007451	36	7	0.211	5.32711
Aplan-10-3620-Thy_vs_Aplan-10th-Exp-NHD13-Donor-plus-Pooled-Tail-Ref	chr2	153649053	153649053	G	C	Dnmt3b	c.-12378G>C		upstream_gene_variant	MODIFIER	143	0	0.009007	33	13	0.448	6.89563
Aplan-10-3620-Thy_vs_Aplan-10th-Exp-NHD13-Donor-plus-Pooled-Tail-Ref	chr2	153662816	153662816	C	G	Dnmt3b	c.337C>G	p.Arg113Gly	missense_variant	MODERATE	151	0	0.007835	51	10	0.2	6.289
Aplan-10-3620-Thy_vs_Aplan-10th-Exp-NHD13-Donor-plus-Pooled-Tail-Ref	chr2	154689604	154689604	C	G	Chmp4b	c.277C>G	p.Arg93Gly	missense_variant	MODERATE	120	0	0.009994	32	8	0.214	5.74593
Aplan-10-3620-Thy_vs_Aplan-10th-Exp-NHD13-Donor-plus-Pooled-Tail-Ref	chr2	155500775	155500775	C	G	Ggt7	c.1030G>C	p.Gly344Arg	missense_variant	MODERATE	51	0	0.022	24	8	0.348	4.36058
Aplan-10-3620-Thy_vs_Aplan-10th-Exp-NHD13-Donor-plus-Pooled-Tail-Ref	chr2	155986945	155986945	C	G	Cep250	c.3695-50C>G		intron_variant	MODIFIER	74	0	0.018	21	7	0.375	4.97786
Aplan-10-3620-Thy_vs_Aplan-10th-Exp-NHD13-Donor-plus-Pooled-Tail-Ref	chr2	156039148	156039148	G	C	Fer1l4	c.2497C>G	p.Arg833Gly	missense_variant	MODERATE	121	0	0.009341	31	7	0.275	5.08971
Aplan-10-3620-Thy_vs_Aplan-10th-Exp-NHD13-Donor-plus-Pooled-Tail-Ref	chr2	156503805	156503805	G	C	Epb41l1	c.727G>C	p.Ala243Pro	missense_variant	MODERATE	96	0	0.012	29	9	0.318	6.18376
Aplan-10-3620-Thy_vs_Aplan-10th-Exp-NHD13-Donor-plus-Pooled-Tail-Ref	chr2	157935361	157935361	G	C	Vstm2l	c.158G>C	p.Arg53Pro	missense_variant	MODERATE	235	1	0.005419	49	9	0.209	6.21273
Aplan-10-3620-Thy_vs_Aplan-10th-Exp-NHD13-Donor-plus-Pooled-Tail-Ref	chr2	158217699	158217699	G	C	D630003M21Rik	c.280C>G	p.Pro94Ala	missense_variant	MODERATE	119	0	0.009517	31	6	0.2	4.2882
Aplan-10-3620-Thy_vs_Aplan-10th-Exp-NHD13-Donor-plus-Pooled-Tail-Ref	chr2	158322139	158322139	G	C	Lbp	c.981+25G>C		intron_variant	MODIFIER	308	0	0.00395	82	19	0.236	6.22712
Aplan-10-3620-Thy_vs_Aplan-10th-Exp-NHD13-Donor-plus-Pooled-Tail-Ref	chr2	163319633	163319633	C	G	Tox2	c.972C>G	p.Leu324Leu	synonymous_variant	LOW	209	0	0.006358	47	14	0.297	6.18182
Aplan-10-3620-Thy_vs_Aplan-10th-Exp-NHD13-Donor-plus-Pooled-Tail-Ref	chr2	164178524	164178524	C	G	Wfdc5	c.347G>C	p.Arg116Pro	missense_variant	MODERATE	218	0	0.00534	30	8	0.25	7.73318
Aplan-10-3620-Thy_vs_Aplan-10th-Exp-NHD13-Donor-plus-Pooled-Tail-Ref	chr2	165380523	165380523	C	G	Zfp334	c.1599G>C	p.Ala533Ala	synonymous_variant	LOW	357	0	0.003647	28	8	0.269	7.41716
Aplan-10-3620-Thy_vs_Aplan-10th-Exp-NHD13-Donor-plus-Pooled-Tail-Ref	chr2	165408909	165408909	G	C	Slc13a3	c.1539C>G	p.Val513Val	synonymous_variant	LOW	124	0	0.009986	18	6	0.293	5.74125
Aplan-10-3620-Thy_vs_Aplan-10th-Exp-NHD13-Donor-plus-Pooled-Tail-Ref	chr2	165716005	165716005	C	G	Eya2	c.520C>G	p.Pro174Ala	missense_variant	MODERATE	413	0	0.00297	57	13	0.25	7.15483
Aplan-10-3620-Thy_vs_Aplan-10th-Exp-NHD13-Donor-plus-Pooled-Tail-Ref	chr2	168185094	168185094	G	C	Adnp	c.280C>G	p.Arg94Gly	missense_variant	MODERATE	274	0	0.004424	109	20	0.206	6.98999
Aplan-10-3620-Thy_vs_Aplan-10th-Exp-NHD13-Donor-plus-Pooled-Tail-Ref	chr2	172249804	172249804	C	G	Mc3r	c.945C>G	p.Cys315Trp	missense_variant	MODERATE	332	2	0.003768	69	18	0.217	6.99885
Aplan-10-3620-Thy_vs_Aplan-10th-Exp-NHD13-Donor-plus-Pooled-Tail-Ref	chr2	172357122	172357122	C	G	Aurka	c.1027G>C	p.Glu343Gln	missense_variant	MODERATE	140	0	0.0086	59	16	0.296	6.06144
Aplan-10-3620-Thy_vs_Aplan-10th-Exp-NHD13-Donor-plus-Pooled-Tail-Ref	chr2	173155239	173155239	C	G	Pck1	c.673C>G	p.Arg225Gly	missense_variant	MODERATE	116	0	0.009994	29	5	0.2	3.62274
Aplan-10-3620-Thy_vs_Aplan-10th-Exp-NHD13-Donor-plus-Pooled-Tail-Ref	chr2	173156042	173156042	C	G	Pck1	c.903C>G	p.Pro301Pro	synonymous_variant	LOW	166	0	0.007594	39	8	0.235	6.03941
Aplan-10-3620-Thy_vs_Aplan-10th-Exp-NHD13-Donor-plus-Pooled-Tail-Ref	chr2	179780397	179780397	C	G	Cdh4	c.313C>G	p.Arg105Gly	missense_variant	MODERATE	56	0	0.02	18	5	0.296	3.27418
Aplan-10-3620-Thy_vs_Aplan-10th-Exp-NHD13-Donor-plus-Pooled-Tail-Ref	chr2	180180270	180180270	G	C	Mir7005	n.-447C>G		upstream_gene_variant	MODIFIER	128	0	0.008427	46	9	0.231	5.47176
Aplan-10-3620-Thy_vs_Aplan-10th-Exp-NHD13-Donor-plus-Pooled-Tail-Ref	chr2	181000935	181000935	C	G	Col20a1	c.2243C>G	p.Ser748Trp	missense_variant	MODERATE	149	0	0.008346	39	7	0.212	4.98061
Aplan-10-3620-Thy_vs_Aplan-10th-Exp-NHD13-Donor-plus-Pooled-Tail-Ref	chr3	51323282	51323282	C	G	Elf2	c.12G>C	p.Ala4Ala	synonymous_variant	LOW	191	0	0.006325	74	18	0.246	6.21093
Aplan-10-3620-Thy_vs_Aplan-10th-Exp-NHD13-Donor-plus-Pooled-Tail-Ref	chr3	63722912	63722912	C	G	Plch1	c.1435-1G>C		splice_acceptor_variant&intron_variant	HIGH	281	0	0.003961	91	19	0.224	6.37777
Aplan-10-3620-Thy_vs_Aplan-10th-Exp-NHD13-Donor-plus-Pooled-Tail-Ref	chr3	69567118	69567118	G	C	Ppm1l-B3galnt1	n.69567118G>C		intergenic_region	MODIFIER	508	0	0.00231	167	77	0.471	6.07704
Aplan-10-3620-Thy_vs_Aplan-10th-Exp-NHD13-Donor-plus-Pooled-Tail-Ref	chr3	69575737	69575737	G	C	B3galnt1	c.190C>G	p.Arg64Gly	missense_variant	MODERATE	225	0	0.004962	83	16	0.211	6.48248
Aplan-10-3620-Thy_vs_Aplan-10th-Exp-NHD13-Donor-plus-Pooled-Tail-Ref	chr3	79419404	79419404	G	C	Gm17359	c.338G>C	p.Arg113Pro	missense_variant	MODERATE	178	0	0.007267	57	14	0.25	6.01914
Aplan-10-3620-Thy_vs_Aplan-10th-Exp-NHD13-Donor-plus-Pooled-Tail-Ref	chr3	86359905	86359905	C	G	Lrba	c.4901C>G	p.Ala1634Gly	missense_variant	MODERATE	201	1	0.011	74	16	0.242	7.11817
Aplan-10-3620-Thy_vs_Aplan-10th-Exp-NHD13-Donor-plus-Pooled-Tail-Ref	chr3	88333571	88333571	C	G	Tmem79	c.69G>C	p.Pro23Pro	synonymous_variant	LOW	138	0	0.008446	34	6	0.206	4.38886
Aplan-10-3620-Thy_vs_Aplan-10th-Exp-NHD13-Donor-plus-Pooled-Tail-Ref	chr3	88376846	88376846	C	G	Bglap3	c.-7310G>C		upstream_gene_variant	MODIFIER	65	0	0.018	56	22	0.355	6.56284
Aplan-10-3620-Thy_vs_Aplan-10th-Exp-NHD13-Donor-plus-Pooled-Tail-Ref	chr3	88376904	88376904	C	G	Bglap3	c.-7368G>C		upstream_gene_variant	MODIFIER	56	0	0.02	42	16	0.378	6.75528
Aplan-10-3620-Thy_vs_Aplan-10th-Exp-NHD13-Donor-plus-Pooled-Tail-Ref	chr3	89219208	89219208	G	C	Thbs3	c.757-5G>C		splice_region_variant&intron_variant	LOW	236	0	0.004806	47	10	0.227	6.37402
Aplan-10-3620-Thy_vs_Aplan-10th-Exp-NHD13-Donor-plus-Pooled-Tail-Ref	chr3	89226518	89226518	C	G	Thbs3	c.2813-8C>G		splice_region_variant&intron_variant	LOW	284	0	0.004253	91	23	0.246	6.552
Aplan-10-3620-Thy_vs_Aplan-10th-Exp-NHD13-Donor-plus-Pooled-Tail-Ref	chr3	89230868	89230868	C	G	Muc1	c.1016C>G	p.Ser339Trp	missense_variant	MODERATE	547	0	0.00218	133	29	0.212	6.50426
Aplan-10-3620-Thy_vs_Aplan-10th-Exp-NHD13-Donor-plus-Pooled-Tail-Ref	chr3	89236473	89236473	C	G	Trim46	c.1716G>C	p.Thr572Thr	synonymous_variant	LOW	60	2	0.037	15	5	0.357	2.54783
Aplan-10-3620-Thy_vs_Aplan-10th-Exp-NHD13-Donor-plus-Pooled-Tail-Ref	chr3	89334838	89334838	G	C	Efna4	c.422C>G	p.Pro141Arg	missense_variant	MODERATE	101	0	0.012	25	5	0.238	3.66245
Aplan-10-3620-Thy_vs_Aplan-10th-Exp-NHD13-Donor-plus-Pooled-Tail-Ref	chr3	90170016	90170016	G	C	Nup210l	c.2658G>C	p.Ala886Ala	synonymous_variant	LOW	213	0	0.005941	35	11	0.333	6.42694
Aplan-10-3620-Thy_vs_Aplan-10th-Exp-NHD13-Donor-plus-Pooled-Tail-Ref	chr3	94387507	94387507	G	C	Rorc	c.204G>C	p.Thr68Thr	synonymous_variant	LOW	87	1	0.026	13	5	0.332	4.02059
Aplan-10-3620-Thy_vs_Aplan-10th-Exp-NHD13-Donor-plus-Pooled-Tail-Ref	chr3	96185194	96185194	G	C	Sv2a	c.209G>C	p.Gly70Ala	missense_variant	MODERATE	105	2	0.031	34	11	0.343	5.60388
Aplan-10-3620-Thy_vs_Aplan-10th-Exp-NHD13-Donor-plus-Pooled-Tail-Ref	chr3	96284376	96284376	G	C	Fcgr1	c.1115C>G	p.Ala372Gly	missense_variant	MODERATE	393	0	0.003127	49	13	0.272	6.1975
Aplan-10-3620-Thy_vs_Aplan-10th-Exp-NHD13-Donor-plus-Pooled-Tail-Ref	chr3	96286992	96286992	G	C	Fcgr1	c.578C>G	p.Thr193Arg	missense_variant	MODERATE	241	0	0.005278	81	17	0.2	6.24801
Aplan-10-3620-Thy_vs_Aplan-10th-Exp-NHD13-Donor-plus-Pooled-Tail-Ref	chr3	96652904	96652904	G	C	Itga10	c.1733G>C	p.Arg578Pro	missense_variant	MODERATE	171	0	0.007189	44	13	0.275	6.30552
Aplan-10-3620-Thy_vs_Aplan-10th-Exp-NHD13-Donor-plus-Pooled-Tail-Ref	chr3	96679629	96679629	G	C	Ankrd35	c.260-1G>C		splice_acceptor_variant&intron_variant	HIGH	233	0	0.005136	61	13	0.25	6.10869
Aplan-10-3620-Thy_vs_Aplan-10th-Exp-NHD13-Donor-plus-Pooled-Tail-Ref	chr3	97050888	97050888	C	G	Gja5	c.260C>G	p.Thr87Arg	missense_variant	MODERATE	173	0	0.007142	60	14	0.255	7.06996
Aplan-10-3620-Thy_vs_Aplan-10th-Exp-NHD13-Donor-plus-Pooled-Tail-Ref	chr3	101835167	101835167	G	C	Mab21l3	c.76C>G	p.Arg26Gly	missense_variant	MODERATE	199	0	0.006115	48	9	0.214	6.68591
Aplan-10-3620-Thy_vs_Aplan-10th-Exp-NHD13-Donor-plus-Pooled-Tail-Ref	chr3	102183976	102183976	G	C	Vangl1	c.793C>G	p.Arg265Gly	missense_variant	MODERATE	190	0	0.006365	52	15	0.288	6.06111
Aplan-10-3620-Thy_vs_Aplan-10th-Exp-NHD13-Donor-plus-Pooled-Tail-Ref	chr3	103165039	103165039	G	C	Dennd2c	c.2439G>C	p.Ala813Ala	synonymous_variant	LOW	222	0	0.005667	49	14	0.311	6.23457
Aplan-10-3620-Thy_vs_Aplan-10th-Exp-NHD13-Donor-plus-Pooled-Tail-Ref	chr3	103171787	103171787	C	G	Bcas2	c.15C>G	p.Gly5Gly	synonymous_variant	LOW	279	0	0.004349	40	9	0.235	6.58784
Aplan-10-3620-Thy_vs_Aplan-10th-Exp-NHD13-Donor-plus-Pooled-Tail-Ref	chr3	105658698	105658698	G	C	Kcnd3	c.1194G>C	p.Pro398Pro	synonymous_variant	LOW	185	0	0.006138	36	7	0.221	5.74507
Aplan-10-3620-Thy_vs_Aplan-10th-Exp-NHD13-Donor-plus-Pooled-Tail-Ref	chr3	105928009	105928009	C	G	I830077J02Rik	c.51G>C	p.Thr17Thr	synonymous_variant	LOW	196	0	0.006105	62	18	0.282	6.07107
Aplan-10-3620-Thy_vs_Aplan-10th-Exp-NHD13-Donor-plus-Pooled-Tail-Ref	chr3	108109553	108109553	G	C	Gnai3	c.934C>G	p.Arg312Gly	missense_variant	MODERATE	292	0	0.004012	134	32	0.223	6.76504
Aplan-10-3620-Thy_vs_Aplan-10th-Exp-NHD13-Donor-plus-Pooled-Tail-Ref	chr3	116900605	116900605	G	C	Frrs1	c.1325G>C	p.Arg442Pro	missense_variant&splice_region_variant	MODERATE	214	0	0.005777	57	14	0.256	6.75139
Aplan-10-3620-Thy_vs_Aplan-10th-Exp-NHD13-Donor-plus-Pooled-Tail-Ref	chr3	127634822	127634822	C	G	Neurog2	c.*302C>G		3_prime_UTR_variant	MODIFIER	224	0	0.004847	65	14	0.218	6.35479
Aplan-10-3620-Thy_vs_Aplan-10th-Exp-NHD13-Donor-plus-Pooled-Tail-Ref	chr3	129693006	129693006	G	C	Egf	c.2790C>G	p.Cys930Trp	missense_variant	MODERATE	185	0	0.006709	43	16	0.335	6.28935
Aplan-10-3620-Thy_vs_Aplan-10th-Exp-NHD13-Donor-plus-Pooled-Tail-Ref	chr3	135727446	135727446	C	G	Nfkb1-Slc39a8	n.135727446C>G		intergenic_region	MODIFIER	161	0	0.008053	37	12	0.281	6.06679
Aplan-10-3620-Thy_vs_Aplan-10th-Exp-NHD13-Donor-plus-Pooled-Tail-Ref	chr3	138114209	138114209	G	C	Mttp	c.959C>G	p.Ala320Gly	missense_variant	MODERATE	95	0	0.012	14	6	0.5	5.82887
Aplan-10-3620-Thy_vs_Aplan-10th-Exp-NHD13-Donor-plus-Pooled-Tail-Ref	chr3	146284841	146284841	C	G	Lpar3	c.913C>G	p.Arg305Gly	missense_variant	MODERATE	192	1	0.006278	49	11	0.211	7.02816
Aplan-10-3620-Thy_vs_Aplan-10th-Exp-NHD13-Donor-plus-Pooled-Tail-Ref	chr3	148846906	148846906	C	G	Adgrl2	c.1960G>C	p.Val654Leu	missense_variant	MODERATE	267	1	0.004797	53	11	0.204	6.43768
Aplan-10-3620-Thy_vs_Aplan-10th-Exp-NHD13-Donor-plus-Pooled-Tail-Ref	chr3	148849727	148849727	C	G	Adgrl2	c.1833+39G>C		intron_variant	MODIFIER	149	1	0.00874	29	9	0.296	6.65301
Aplan-10-3620-Thy_vs_Aplan-10th-Exp-NHD13-Donor-plus-Pooled-Tail-Ref	chr3	152846637	152846637	C	G	St6galnac5	c.292G>C	p.Val98Leu	missense_variant	MODERATE	100	0	0.012	51	9	0.209	4.46229
Aplan-10-3620-Thy_vs_Aplan-10th-Exp-NHD13-Donor-plus-Pooled-Tail-Ref	chr4	8832560	8832560	G	C	Chd7	c.3434G>C	p.Arg1145Pro	missense_variant	MODERATE	139	0	0.008621	51	12	0.244	7.30998
Aplan-10-3620-Thy_vs_Aplan-10th-Exp-NHD13-Donor-plus-Pooled-Tail-Ref	chr4	8844575	8844575	C	G	Chd7	c.4683C>G	p.Asp1561Glu	missense_variant	MODERATE	236	0	0.004808	56	12	0.25	7.25212
Aplan-10-3620-Thy_vs_Aplan-10th-Exp-NHD13-Donor-plus-Pooled-Tail-Ref	chr4	8866206	8866206	G	C	Chd7	c.8512G>C	p.Asp2838His	missense_variant	MODERATE	172	0	0.006912	54	17	0.287	6.74821
Aplan-10-3620-Thy_vs_Aplan-10th-Exp-NHD13-Donor-plus-Pooled-Tail-Ref	chr4	40177857	40177857	C	G	Aco1	c.877C>G	p.Arg293Gly	missense_variant	MODERATE	112	0	0.011	35	6	0.225	3.89133
Aplan-10-3620-Thy_vs_Aplan-10th-Exp-NHD13-Donor-plus-Pooled-Tail-Ref	chr4	41119816	41119816	G	C	Nol6	c.1681C>G	p.Leu561Val	missense_variant	MODERATE	135	0	0.008822	19	14	0.684	7.32239
Aplan-10-3620-Thy_vs_Aplan-10th-Exp-NHD13-Donor-plus-Pooled-Tail-Ref	chr4	41773152	41773152	G	C	Il11ra1	c.*4032G>C		downstream_gene_variant	MODIFIER	120	0	0.009919	42	20	0.512	7.11412
Aplan-10-3620-Thy_vs_Aplan-10th-Exp-NHD13-Donor-plus-Pooled-Tail-Ref	chr4	43414816	43414816	G	C	Rusc2	c.121G>C	p.Ala41Pro	missense_variant	MODERATE	150	0	0.007869	28	11	0.385	6.11797
Aplan-10-3620-Thy_vs_Aplan-10th-Exp-NHD13-Donor-plus-Pooled-Tail-Ref	chr4	43643629	43643629	C	G	Npr2	c.1656C>G	p.His552Gln	missense_variant	MODERATE	399	0	0.00313	76	17	0.242	6.39304
Aplan-10-3620-Thy_vs_Aplan-10th-Exp-NHD13-Donor-plus-Pooled-Tail-Ref	chr4	43821337	43821337	G	C	Olfr156	c.23C>G	p.Thr8Arg	missense_variant	MODERATE	372	0	0.003273	124	56	0.428	5.77385
Aplan-10-3620-Thy_vs_Aplan-10th-Exp-NHD13-Donor-plus-Pooled-Tail-Ref	chr4	43835582	43835582	C	G	Olfr157	c.907G>C	p.Val303Leu	missense_variant	MODERATE	361	0	0.003317	123	23	0.21	6.12037
Aplan-10-3620-Thy_vs_Aplan-10th-Exp-NHD13-Donor-plus-Pooled-Tail-Ref	chr4	46532991	46532991	G	C	Coro2a	c.*6145C>G		downstream_gene_variant	MODIFIER	232	0	0.005727	41	10	0.286	6.8135
Aplan-10-3620-Thy_vs_Aplan-10th-Exp-NHD13-Donor-plus-Pooled-Tail-Ref	chr4	48083211	48083211	G	C	Nr4a3	c.1743G>C	p.Glu581Asp	missense_variant	MODERATE	88	0	0.013	29	9	0.321	5.91627
Aplan-10-3620-Thy_vs_Aplan-10th-Exp-NHD13-Donor-plus-Pooled-Tail-Ref	chr4	49586771	49586771	G	C	Tmem246	c.396C>G	p.Cys132Trp	missense_variant	MODERATE	204	0	0.005734	58	13	0.224	7.24487
Aplan-10-3620-Thy_vs_Aplan-10th-Exp-NHD13-Donor-plus-Pooled-Tail-Ref	chr4	58179651	58179651	G	C	Svep1	c.591C>G	p.Asp197Glu	missense_variant	MODERATE	187	0	0.006718	51	12	0.262	6.7588
Aplan-10-3620-Thy_vs_Aplan-10th-Exp-NHD13-Donor-plus-Pooled-Tail-Ref	chr4	59099309	59099309	C	G	Gng10-Ugcg	n.59099309C>G		intergenic_region	MODIFIER	238	0	0.005069	76	35	0.422	6.64412
Aplan-10-3620-Thy_vs_Aplan-10th-Exp-NHD13-Donor-plus-Pooled-Tail-Ref	chr4	59914406	59914406	G	C	Slc46a2	c.516C>G	p.Ser172Ser	synonymous_variant	LOW	102	0	0.01	36	14	0.437	7.34239
Aplan-10-3620-Thy_vs_Aplan-10th-Exp-NHD13-Donor-plus-Pooled-Tail-Ref	chr4	63368092	63368092	G	C	Akna	c.4169C>G	p.Ala1390Gly	missense_variant	MODERATE	91	0	0.013	28	7	0.24	4.67496
Aplan-10-3620-Thy_vs_Aplan-10th-Exp-NHD13-Donor-plus-Pooled-Tail-Ref	chr4	63982684	63982684	G	C	Tnc	c.4546C>G	p.Arg1516Gly	missense_variant	MODERATE	244	1	0.01	68	14	0.214	7.16486
Aplan-10-3620-Thy_vs_Aplan-10th-Exp-NHD13-Donor-plus-Pooled-Tail-Ref	chr4	64018029	64018029	G	C	Tnc	c.669C>G	p.Asn223Lys	missense_variant	MODERATE	206	0	0.005972	54	16	0.312	6.89391
Aplan-10-3620-Thy_vs_Aplan-10th-Exp-NHD13-Donor-plus-Pooled-Tail-Ref	chr4	96056937	96056937	G	C	Cyp2j13	c.1030C>G	p.Arg344Gly	missense_variant	MODERATE	169	0	0.006919	53	11	0.212	7.2173
Aplan-10-3620-Thy_vs_Aplan-10th-Exp-NHD13-Donor-plus-Pooled-Tail-Ref	chr4	100974100	100974100	G	C	Cachd1	c.2088G>C	p.Thr696Thr	synonymous_variant	LOW	164	0	0.007227	61	21	0.396	7.04957
Aplan-10-3620-Thy_vs_Aplan-10th-Exp-NHD13-Donor-plus-Pooled-Tail-Ref	chr4	101745588	101745588	G	C	Lepr	c.572G>C	p.Arg191Pro	missense_variant	MODERATE	255	0	0.004814	82	26	0.307	6.26821
Aplan-10-3620-Thy_vs_Aplan-10th-Exp-NHD13-Donor-plus-Pooled-Tail-Ref	chr4	103235486	103235486	G	C	4921539E11Rik	c.795+145C>G		intron_variant	MODIFIER	132	0	0.008978	43	8	0.201	5.10689
Aplan-10-3620-Thy_vs_Aplan-10th-Exp-NHD13-Donor-plus-Pooled-Tail-Ref	chr4	108642247	108642247	G	C	Zfyve9	c.1800C>G	p.Asn600Lys	missense_variant	MODERATE	146	0	0.008081	46	7	0.2	4.50408
Aplan-10-3620-Thy_vs_Aplan-10th-Exp-NHD13-Donor-plus-Pooled-Tail-Ref	chr4	115898570	115898570	C	G	Kncn-Dmbx1	n.115898570C>G		intergenic_region	MODIFIER	203	0	0.006063	36	8	0.219	6.88937
Aplan-10-3620-Thy_vs_Aplan-10th-Exp-NHD13-Donor-plus-Pooled-Tail-Ref	chr4	116510750	116510750	C	A	Ipp	c.179C>A	p.Pro60Gln	missense_variant	MODERATE	190	1	0.006856	37	11	0.324	6.65608
Aplan-10-3620-Thy_vs_Aplan-10th-Exp-NHD13-Donor-plus-Pooled-Tail-Ref	chr4	116599085	116599085	G	C	Ccdc17	c.1174G>C	p.Ala392Pro	missense_variant	MODERATE	187	0	0.006043	41	9	0.237	7.04772
Aplan-10-3620-Thy_vs_Aplan-10th-Exp-NHD13-Donor-plus-Pooled-Tail-Ref	chr4	116806083	116806083	C	G	Toe1	c.394G>C	p.Val132Leu	missense_variant	MODERATE	164	1	0.014	45	10	0.231	6.0772
Aplan-10-3620-Thy_vs_Aplan-10th-Exp-NHD13-Donor-plus-Pooled-Tail-Ref	chr4	117162206	117162206	G	C	Kif2c	c.1845+7C>G		splice_region_variant&intron_variant	LOW	253	1	0.009491	107	23	0.213	6.52446
Aplan-10-3620-Thy_vs_Aplan-10th-Exp-NHD13-Donor-plus-Pooled-Tail-Ref	chr4	117865197	117865197	G	C	Slc6a9	c.1437G>C	p.Gly479Gly	splice_region_variant&synonymous_variant	LOW	529	2	0.004498	106	25	0.206	6.46562
Aplan-10-3620-Thy_vs_Aplan-10th-Exp-NHD13-Donor-plus-Pooled-Tail-Ref	chr4	117877440	117877440	G	C	B4galt2	c.730C>G	p.Arg244Gly	missense_variant&splice_region_variant	MODERATE	93	0	0.012	34	7	0.207	4.22037
Aplan-10-3620-Thy_vs_Aplan-10th-Exp-NHD13-Donor-plus-Pooled-Tail-Ref	chr4	117900991	117900991	G	C	Ipo13	c.2174C>G	p.Pro725Arg	missense_variant	MODERATE	148	1	0.016	42	13	0.277	6.65519
Aplan-10-3620-Thy_vs_Aplan-10th-Exp-NHD13-Donor-plus-Pooled-Tail-Ref	chr4	118385579	118385579	G	C	Szt2	c.4398+31C>G		intron_variant	MODIFIER	170	0	0.00671	61	13	0.241	6.30228
Aplan-10-3620-Thy_vs_Aplan-10th-Exp-NHD13-Donor-plus-Pooled-Tail-Ref	chr4	121045988	121045988	G	C	Col9a2	c.735+9G>C		intron_variant	MODIFIER	294	0	0.004104	96	18	0.202	6.89801
Aplan-10-3620-Thy_vs_Aplan-10th-Exp-NHD13-Donor-plus-Pooled-Tail-Ref	chr4	124938642	124938642	C	G	9930104L06Rik	c.200C>G	p.Pro67Arg	missense_variant	MODERATE	253	0	0.005105	43	12	0.302	7.08053
Aplan-10-3620-Thy_vs_Aplan-10th-Exp-NHD13-Donor-plus-Pooled-Tail-Ref	chr4	124938665	124938665	C	G	9930104L06Rik	c.223C>G	p.Arg75Gly	missense_variant	MODERATE	267	0	0.004797	40	11	0.289	6.68133
Aplan-10-3620-Thy_vs_Aplan-10th-Exp-NHD13-Donor-plus-Pooled-Tail-Ref	chr4	125623669	125623669	G	C	Grik3	c.292+12G>C		intron_variant	MODIFIER	214	0	0.005786	58	26	0.488	6.47704
Aplan-10-3620-Thy_vs_Aplan-10th-Exp-NHD13-Donor-plus-Pooled-Tail-Ref	chr4	126355165	126355165	G	C	Ago3	c.1592C>G	p.Ala531Gly	missense_variant&splice_region_variant	MODERATE	129	0	0.008927	32	6	0.207	4.38547
Aplan-10-3620-Thy_vs_Aplan-10th-Exp-NHD13-Donor-plus-Pooled-Tail-Ref	chr4	126542384	126542384	C	G	Ago4-Clspn	n.126542384C>G		intergenic_region	MODIFIER	368	0	0.003424	62	16	0.264	6.22221
Aplan-10-3620-Thy_vs_Aplan-10th-Exp-NHD13-Donor-plus-Pooled-Tail-Ref	chr4	127200293	127200293	G	C	Dlgap3	c.1337G>C	p.Arg446Pro	missense_variant	MODERATE	465	0	0.002917	31	7	0.222	6.60965
Aplan-10-3620-Thy_vs_Aplan-10th-Exp-NHD13-Donor-plus-Pooled-Tail-Ref	chr4	128592470	128592470	C	G	Zscan20	c.436G>C	p.Glu146Gln	missense_variant	MODERATE	163	0	0.007333	40	9	0.256	6.69273
Aplan-10-3620-Thy_vs_Aplan-10th-Exp-NHD13-Donor-plus-Pooled-Tail-Ref	chr4	129139394	129139394	C	G	Fndc5	c.253C>G	p.Arg85Gly	missense_variant	MODERATE	135	0	0.009428	37	7	0.229	4.87992
Aplan-10-3620-Thy_vs_Aplan-10th-Exp-NHD13-Donor-plus-Pooled-Tail-Ref	chr4	129490457	129490457	C	G	Tssk3	c.145+5G>C		splice_region_variant&intron_variant	LOW	143	0	0.008791	32	9	0.3	7.08884
Aplan-10-3620-Thy_vs_Aplan-10th-Exp-NHD13-Donor-plus-Pooled-Tail-Ref	chr4	129490556	129490556	C	G	Tssk3	c.51G>C	p.Gly17Gly	synonymous_variant	LOW	154	0	0.00813	39	11	0.294	6.41573
Aplan-10-3620-Thy_vs_Aplan-10th-Exp-NHD13-Donor-plus-Pooled-Tail-Ref	chr4	129490565	129490565	C	G	Tssk3	c.42G>C	p.Lys14Asn	missense_variant	MODERATE	155	0	0.007947	43	12	0.285	6.77443
Aplan-10-3620-Thy_vs_Aplan-10th-Exp-NHD13-Donor-plus-Pooled-Tail-Ref	chr4	129528978	129528978	G	C	Hdac1	c.229C>G	p.Arg77Gly	missense_variant	MODERATE	225	1	0.005669	77	17	0.219	6.76651
Aplan-10-3620-Thy_vs_Aplan-10th-Exp-NHD13-Donor-plus-Pooled-Tail-Ref	chr4	129578178	129578178	G	C	Fam167b	c.198C>G	p.Pro66Pro	synonymous_variant	LOW	119	0	0.0096	30	13	0.4	6.62771
Aplan-10-3620-Thy_vs_Aplan-10th-Exp-NHD13-Donor-plus-Pooled-Tail-Ref	chr4	129578188	129578188	G	C	Fam167b	c.188C>G	p.Pro63Arg	missense_variant	MODERATE	124	0	0.009259	30	13	0.4	6.78645
Aplan-10-3620-Thy_vs_Aplan-10th-Exp-NHD13-Donor-plus-Pooled-Tail-Ref	chr4	131808413	131808413	C	G	Ptpru	c.1252G>C	p.Ala418Pro	missense_variant	MODERATE	161	0	0.00779	40	10	0.263	7.44518
Aplan-10-3620-Thy_vs_Aplan-10th-Exp-NHD13-Donor-plus-Pooled-Tail-Ref	chr4	132857355	132857355	G	C	Stx12	c.677C>G	p.Ser226Trp	missense_variant	MODERATE	246	0	0.005075	54	18	0.317	6.62694
Aplan-10-3620-Thy_vs_Aplan-10th-Exp-NHD13-Donor-plus-Pooled-Tail-Ref	chr4	132994738	132994738	G	C	Fgr	c.484G>C	p.Glu162Gln	missense_variant	MODERATE	83	0	0.013	30	7	0.251	4.27808
Aplan-10-3620-Thy_vs_Aplan-10th-Exp-NHD13-Donor-plus-Pooled-Tail-Ref	chr4	134233779	134233779	G	C	Cnksr1	c.685-15C>G		intron_variant	MODIFIER	209	0	0.005702	31	6	0.214	5.52954
Aplan-10-3620-Thy_vs_Aplan-10th-Exp-NHD13-Donor-plus-Pooled-Tail-Ref	chr4	134905405	134905405	G	C	Tmem50a	c.213C>G	p.Asn71Lys	missense_variant	MODERATE	168	0	0.007711	41	8	0.234	5.91654
Aplan-10-3620-Thy_vs_Aplan-10th-Exp-NHD13-Donor-plus-Pooled-Tail-Ref	chr4	135506379	135506379	G	C	Stpg1	c.-30G>C		5_prime_UTR_variant	MODIFIER	118	0	0.011	37	8	0.226	5.25071
Aplan-10-3620-Thy_vs_Aplan-10th-Exp-NHD13-Donor-plus-Pooled-Tail-Ref	chr4	135715812	135715812	G	C	Ifnlr1-Il22ra1	n.135715812G>C		intergenic_region	MODIFIER	153	0	0.00738	50	9	0.214	5.7307
Aplan-10-3620-Thy_vs_Aplan-10th-Exp-NHD13-Donor-plus-Pooled-Tail-Ref	chr4	136273591	136273591	G	C	Tcea3	c.964-53G>C		intron_variant	MODIFIER	157	0	0.007233	43	15	0.366	6.15811
Aplan-10-3620-Thy_vs_Aplan-10th-Exp-NHD13-Donor-plus-Pooled-Tail-Ref	chr4	136559221	136559221	G	C	Kdm1a	c.1431C>G	p.Ala477Ala	synonymous_variant	LOW	141	0	0.009261	37	12	0.273	7.07228
Aplan-10-3620-Thy_vs_Aplan-10th-Exp-NHD13-Donor-plus-Pooled-Tail-Ref	chr4	137322518	137322518	G	C	Cdc42	c.*12C>G		3_prime_UTR_variant	MODIFIER	120	0	0.009934	48	11	0.231	6.37799
Aplan-10-3620-Thy_vs_Aplan-10th-Exp-NHD13-Donor-plus-Pooled-Tail-Ref	chr4	137515387	137515387	G	C	Hspg2	c.1912G>C	p.Val638Leu	missense_variant	MODERATE	123	0	0.009728	29	7	0.269	5.31626
Aplan-10-3620-Thy_vs_Aplan-10th-Exp-NHD13-Donor-plus-Pooled-Tail-Ref	chr4	140735668	140735668	C	G	Padi6	c.822+8G>C		splice_region_variant&intron_variant	LOW	160	0	0.007575	29	6	0.269	5.08992
Aplan-10-3620-Thy_vs_Aplan-10th-Exp-NHD13-Donor-plus-Pooled-Tail-Ref	chr4	140827962	140827962	C	G	Padi1	c.866G>C	p.Arg289Pro	missense_variant	MODERATE	89	1	0.013	33	8	0.275	3.98098
Aplan-10-3620-Thy_vs_Aplan-10th-Exp-NHD13-Donor-plus-Pooled-Tail-Ref	chr4	141308727	141308727	G	C	Epha2	c.473G>C	p.Arg158Pro	missense_variant	MODERATE	126	0	0.008374	41	7	0.201	4.44942
Aplan-10-3620-Thy_vs_Aplan-10th-Exp-NHD13-Donor-plus-Pooled-Tail-Ref	chr4	141475756	141475756	G	C	Spen	c.5559C>G	p.Ser1853Arg	missense_variant	MODERATE	268	0	0.004192	78	40	0.5	6.52146
Aplan-10-3620-Thy_vs_Aplan-10th-Exp-NHD13-Donor-plus-Pooled-Tail-Ref	chr4	141614542	141614542	G	C	Tmem82	c.*39C>G		3_prime_UTR_variant	MODIFIER	256	0	0.004616	36	7	0.219	6.60222
Aplan-10-3620-Thy_vs_Aplan-10th-Exp-NHD13-Donor-plus-Pooled-Tail-Ref	chr4	141805492	141805492	G	C	Casp9	c.698G>C	p.Arg233Pro	missense_variant	MODERATE	187	1	0.006598	75	20	0.25	6.5221
Aplan-10-3620-Thy_vs_Aplan-10th-Exp-NHD13-Donor-plus-Pooled-Tail-Ref	chr4	145085345	145085345	C	G	Vps13d	c.10091G>C	p.Arg3364Pro	missense_variant	MODERATE	241	1	0.004914	70	16	0.228	6.96343
Aplan-10-3620-Thy_vs_Aplan-10th-Exp-NHD13-Donor-plus-Pooled-Tail-Ref	chr4	148011096	148011096	G	C	Clcn6	c.2017C>G	p.Arg673Gly	missense_variant	MODERATE	78	0	0.015	30	6	0.231	3.50822
Aplan-10-3620-Thy_vs_Aplan-10th-Exp-NHD13-Donor-plus-Pooled-Tail-Ref	chr4	149270862	149270862	G	C	Kif1b	c.463C>G	p.Arg155Gly	missense_variant	MODERATE	120	0	0.009972	41	7	0.216	4.33609
Aplan-10-3620-Thy_vs_Aplan-10th-Exp-NHD13-Donor-plus-Pooled-Tail-Ref	chr4	149457445	149457445	G	C	Rbp7	c.-2495C>G		upstream_gene_variant	MODIFIER	232	0	0.005001	55	14	0.217	7.24734
Aplan-10-3620-Thy_vs_Aplan-10th-Exp-NHD13-Donor-plus-Pooled-Tail-Ref	chr4	149744811	149744811	C	G	Slc25a33	c.890G>C	p.Arg297Pro	missense_variant	MODERATE	110	0	0.01	26	5	0.231	3.73813
Aplan-10-3620-Thy_vs_Aplan-10th-Exp-NHD13-Donor-plus-Pooled-Tail-Ref	chr4	149906654	149906654	G	C	Spsb1	c.456C>G	p.Asp152Glu	missense_variant	MODERATE	226	0	0.005018	33	15	0.455	6.24447
Aplan-10-3620-Thy_vs_Aplan-10th-Exp-NHD13-Donor-plus-Pooled-Tail-Ref	chr4	152106423	152106423	G	C	Plekhg5	c.1057G>C	p.Gly353Arg	missense_variant	MODERATE	103	0	0.012	16	5	0.333	4.62131
Aplan-10-3620-Thy_vs_Aplan-10th-Exp-NHD13-Donor-plus-Pooled-Tail-Ref	chr4	152280165	152280165	G	C	Gpr153	c.677G>C	p.Arg226Pro	missense_variant	MODERATE	159	0	0.007274	28	5	0.23	4.26415
Aplan-10-3620-Thy_vs_Aplan-10th-Exp-NHD13-Donor-plus-Pooled-Tail-Ref	chr4	156230223	156230223	G	C	Klhl17	c.1734C>G	p.Tyr578*	stop_gained	HIGH	202	0	0.006122	25	6	0.272	6.00167
Aplan-10-3620-Thy_vs_Aplan-10th-Exp-NHD13-Donor-plus-Pooled-Tail-Ref	chr5	3236806	3236806	C	G	CHR_START-Cdk6	n.3236806C>G		intergenic_region	MODIFIER	348	0	0.003355	107	24	0.25	6.25772
Aplan-10-3620-Thy_vs_Aplan-10th-Exp-NHD13-Donor-plus-Pooled-Tail-Ref	chr5	3603251	3603251	C	G	Pex1	c.149C>G	p.Ala50Gly	missense_variant	MODERATE	236	1	0.005186	79	14	0.21	6.3293
Aplan-10-3620-Thy_vs_Aplan-10th-Exp-NHD13-Donor-plus-Pooled-Tail-Ref	chr5	4029978	4029978	G	C	Akap9	c.5729G>C	p.Arg1910Pro	missense_variant	MODERATE	183	0	0.006757	41	8	0.216	6.16134
Aplan-10-3620-Thy_vs_Aplan-10th-Exp-NHD13-Donor-plus-Pooled-Tail-Ref	chr5	7344272	7344272	G	C	Zfp804b	c.107C>G	p.Pro36Arg	missense_variant&splice_region_variant	MODERATE	118	0	0.01	27	5	0.2	3.79036
Aplan-10-3620-Thy_vs_Aplan-10th-Exp-NHD13-Donor-plus-Pooled-Tail-Ref	chr5	21683217	21683217	G	C	Napepld	c.233C>G	p.Pro78Arg	missense_variant	MODERATE	226	0	0.005513	55	14	0.258	7.13832
Aplan-10-3620-Thy_vs_Aplan-10th-Exp-NHD13-Donor-plus-Pooled-Tail-Ref	chr5	32945122	32945122	C	G	Depdc5	c.2971C>G	p.Arg991Gly	missense_variant	MODERATE	179	0	0.006489	49	11	0.239	6.05359
Aplan-10-3620-Thy_vs_Aplan-10th-Exp-NHD13-Donor-plus-Pooled-Tail-Ref	chr5	34217629	34217629	C	G	Zfyve28	c.1040G>C	p.Arg347Pro	missense_variant	MODERATE	156	0	0.007387	40	15	0.385	6.47044
Aplan-10-3620-Thy_vs_Aplan-10th-Exp-NHD13-Donor-plus-Pooled-Tail-Ref	chr5	34420077	34420077	G	C	Fam193a	c.545G>C	p.Gly182Ala	missense_variant	MODERATE	119	0	0.009998	30	12	0.423	7.38168
Aplan-10-3620-Thy_vs_Aplan-10th-Exp-NHD13-Donor-plus-Pooled-Tail-Ref	chr5	34628520	34628520	C	G	Add1	c.1861+7C>G		splice_region_variant&intron_variant	LOW	114	0	0.01	31	6	0.221	4.19833
Aplan-10-3620-Thy_vs_Aplan-10th-Exp-NHD13-Donor-plus-Pooled-Tail-Ref	chr5	35066560	35066560	G	C	Dok7	c.331G>C	p.Val111Leu	missense_variant	MODERATE	170	0	0.007294	46	13	0.27	6.09623
Aplan-10-3620-Thy_vs_Aplan-10th-Exp-NHD13-Donor-plus-Pooled-Tail-Ref	chr5	36027917	36027917	C	G	Sorcs2	c.2814G>C	p.Val938Val	synonymous_variant	LOW	72	0	0.017	35	8	0.214	4.14142
Aplan-10-3620-Thy_vs_Aplan-10th-Exp-NHD13-Donor-plus-Pooled-Tail-Ref	chr5	63800039	63800039	C	G	Nwd2	c.711C>G	p.Ile237Met	missense_variant	MODERATE	86	0	0.013	32	7	0.235	4.1949
Aplan-10-3620-Thy_vs_Aplan-10th-Exp-NHD13-Donor-plus-Pooled-Tail-Ref	chr5	63805507	63805507	C	G	Nwd2	c.2433C>G	p.Pro811Pro	synonymous_variant	LOW	282	2	0.008498	49	11	0.244	6.36056
Aplan-10-3620-Thy_vs_Aplan-10th-Exp-NHD13-Donor-plus-Pooled-Tail-Ref	chr5	63807536	63807536	C	G	Nwd2	c.4462C>G	p.Pro1488Ala	missense_variant	MODERATE	183	0	0.00595	55	13	0.269	7.0439
Aplan-10-3620-Thy_vs_Aplan-10th-Exp-NHD13-Donor-plus-Pooled-Tail-Ref	chr5	64926817	64926817	C	G	Tlr1	c.416G>C	p.Gly139Ala	missense_variant	MODERATE	433	0	0.002619	154	31	0.202	6.12862
Aplan-10-3620-Thy_vs_Aplan-10th-Exp-NHD13-Donor-plus-Pooled-Tail-Ref	chr5	65223773	65223773	C	G	Wdr19	c.1139C>G	p.Pro380Arg	missense_variant	MODERATE	129	0	0.008876	36	6	0.206	4.1181
Aplan-10-3620-Thy_vs_Aplan-10th-Exp-NHD13-Donor-plus-Pooled-Tail-Ref	chr5	65372247	65372247	G	C	Klb	c.1117G>C	p.Gly373Arg	missense_variant	MODERATE	188	0	0.006534	58	18	0.354	6.21724
Aplan-10-3620-Thy_vs_Aplan-10th-Exp-NHD13-Donor-plus-Pooled-Tail-Ref	chr5	66261084	66261084	C	G	Nsun7	c.156C>G	p.Tyr52*	stop_gained	HIGH	208	0	0.005601	70	24	0.327	5.99875
Aplan-10-3620-Thy_vs_Aplan-10th-Exp-NHD13-Donor-plus-Pooled-Tail-Ref	chr5	72245758	72245758	C	G	Atp10d	c.990C>G	p.Arg330Arg	synonymous_variant	LOW	234	0	0.005431	61	16	0.261	6.85613
Aplan-10-3620-Thy_vs_Aplan-10th-Exp-NHD13-Donor-plus-Pooled-Tail-Ref	chr5	81766193	81766193	C	G	Adgrl3	c.3647C>G	p.Thr1216Arg	missense_variant	MODERATE	149	0	0.008288	45	11	0.243	7.43276
Aplan-10-3620-Thy_vs_Aplan-10th-Exp-NHD13-Donor-plus-Pooled-Tail-Ref	chr5	86414599	86414599	G	T	Tmprss11a	c.886C>A	p.Arg296Ser	missense_variant	MODERATE	278	0	0.004062	85	23	0.277	6.83171
Aplan-10-3620-Thy_vs_Aplan-10th-Exp-NHD13-Donor-plus-Pooled-Tail-Ref	chr5	93162159	93162159	C	G	45180	c.820C>G	p.Arg274Gly	missense_variant	MODERATE	121	0	0.009887	42	9	0.222	5.60307
Aplan-10-3620-Thy_vs_Aplan-10th-Exp-NHD13-Donor-plus-Pooled-Tail-Ref	chr5	103477072	103477072	G	C	Ptpn13	c.241G>C	p.Ala81Pro	missense_variant	MODERATE	110	0	0.011	39	22	0.543	6.10961
Aplan-10-3620-Thy_vs_Aplan-10th-Exp-NHD13-Donor-plus-Pooled-Tail-Ref	chr5	103527088	103527088	G	C	Ptpn13	c.1930G>C	p.Ala644Pro	missense_variant	MODERATE	139	0	0.008541	45	21	0.537	6.89488
Aplan-10-3620-Thy_vs_Aplan-10th-Exp-NHD13-Donor-plus-Pooled-Tail-Ref	chr5	103968716	103968716	G	C	Hsd17b13	c.539C>G	p.Pro180Arg	missense_variant	MODERATE	77	0	0.017	25	7	0.274	4.58452
Aplan-10-3620-Thy_vs_Aplan-10th-Exp-NHD13-Donor-plus-Pooled-Tail-Ref	chr5	104520211	104520211	G	C	BC005561	c.2598G>C	p.Ser866Ser	synonymous_variant	LOW	455	0	0.002609	144	28	0.206	6.23621
Aplan-10-3620-Thy_vs_Aplan-10th-Exp-NHD13-Donor-plus-Pooled-Tail-Ref	chr5	105607670	105607670	C	G	Lrrc8c	c.1310C>G	p.Pro437Arg	missense_variant	MODERATE	224	0	0.00491	66	15	0.272	6.93662
Aplan-10-3620-Thy_vs_Aplan-10th-Exp-NHD13-Donor-plus-Pooled-Tail-Ref	chr5	105811901	105811901	C	G	Lrrc8d	c.176C>G	p.Pro59Arg	missense_variant	MODERATE	151	1	0.014	51	16	0.333	6.45593
Aplan-10-3620-Thy_vs_Aplan-10th-Exp-NHD13-Donor-plus-Pooled-Tail-Ref	chr5	105813099	105813099	C	G	Lrrc8d	c.1374C>G	p.Phe458Leu	missense_variant	MODERATE	175	0	0.006561	44	10	0.231	7.35945
Aplan-10-3620-Thy_vs_Aplan-10th-Exp-NHD13-Donor-plus-Pooled-Tail-Ref	chr5	107433140	107433140	C	T	Lpcat2b	c.334C>T	p.Arg112Cys	missense_variant	MODERATE	325	0	0.003606	84	31	0.382	6.59351
Aplan-10-3620-Thy_vs_Aplan-10th-Exp-NHD13-Donor-plus-Pooled-Tail-Ref	chr5	107433268	107433268	G	C	Lpcat2b	c.462G>C	p.Ala154Ala	synonymous_variant	LOW	322	1	0.007363	63	23	0.383	6.85332
Aplan-10-3620-Thy_vs_Aplan-10th-Exp-NHD13-Donor-plus-Pooled-Tail-Ref	chr5	110104924	110104924	G	C	Gtpbp6	c.1061C>G	p.Ala354Gly	missense_variant	MODERATE	167	0	0.00672	35	8	0.25	6.4046
Aplan-10-3620-Thy_vs_Aplan-10th-Exp-NHD13-Donor-plus-Pooled-Tail-Ref	chr5	110303876	110303876	G	C	Pole	c.2583G>C	p.Thr861Thr	synonymous_variant	LOW	194	2	0.012	80	15	0.209	6.55819
Aplan-10-3620-Thy_vs_Aplan-10th-Exp-NHD13-Donor-plus-Pooled-Tail-Ref	chr5	110577564	110577564	G	C	Galnt9	c.366G>C	p.Ala122Ala	synonymous_variant	LOW	39	0	0.028	24	7	0.252	3.20373
Aplan-10-3620-Thy_vs_Aplan-10th-Exp-NHD13-Donor-plus-Pooled-Tail-Ref	chr5	110596166	110596166	G	C	Galnt9	c.865G>C	p.Ala289Pro	missense_variant	MODERATE	135	0	0.008907	31	7	0.269	5.36277
Aplan-10-3620-Thy_vs_Aplan-10th-Exp-NHD13-Donor-plus-Pooled-Tail-Ref	chr5	113577374	113577374	G	C	Wscd2	c.1274G>C	p.Arg425Pro	missense_variant	MODERATE	112	0	0.011	29	10	0.375	7.48892
Aplan-10-3620-Thy_vs_Aplan-10th-Exp-NHD13-Donor-plus-Pooled-Tail-Ref	chr5	114195325	114195325	G	C	Acacb	c.1509G>C	p.Ala503Ala	synonymous_variant	LOW	186	1	0.012	24	7	0.38	6.09997
Aplan-10-3620-Thy_vs_Aplan-10th-Exp-NHD13-Donor-plus-Pooled-Tail-Ref	chr5	114361217	114361217	C	G	Kctd10	c.*4425G>C		downstream_gene_variant	MODIFIER	213	0	0.005264	68	17	0.246	6.54858
Aplan-10-3620-Thy_vs_Aplan-10th-Exp-NHD13-Donor-plus-Pooled-Tail-Ref	chr5	115110920	115110920	G	C	Acads	c.1173C>G	p.Tyr391*	stop_gained	HIGH	76	0	0.014	14	7	0.5	6.33785
Aplan-10-3620-Thy_vs_Aplan-10th-Exp-NHD13-Donor-plus-Pooled-Tail-Ref	chr5	115111375	115111375	G	C	Acads	c.973C>G	p.Arg325Gly	missense_variant	MODERATE	134	0	0.009176	41	8	0.219	5.28806
Aplan-10-3620-Thy_vs_Aplan-10th-Exp-NHD13-Donor-plus-Pooled-Tail-Ref	chr5	116136419	116136419	G	C	Ccdc60	c.1125C>G	p.Thr375Thr	synonymous_variant	LOW	138	0	0.009267	54	9	0.214	5.18155
Aplan-10-3620-Thy_vs_Aplan-10th-Exp-NHD13-Donor-plus-Pooled-Tail-Ref	chr5	118261124	118261124	C	G	2410131K14Rik	c.559C>G	p.Arg187Gly	missense_variant	MODERATE	223	0	0.005894	40	8	0.235	6.82149
Aplan-10-3620-Thy_vs_Aplan-10th-Exp-NHD13-Donor-plus-Pooled-Tail-Ref	chr5	121292748	121292748	C	G	Gm15800	c.2647C>G	p.Arg883Gly	missense_variant	MODERATE	164	0	0.007552	57	15	0.236	6.3068
Aplan-10-3620-Thy_vs_Aplan-10th-Exp-NHD13-Donor-plus-Pooled-Tail-Ref	chr5	121301780	121301780	C	G	Gm15800	c.3342C>G	p.Tyr1114*	stop_gained	HIGH	168	0	0.007429	64	19	0.314	6.92905
Aplan-10-3620-Thy_vs_Aplan-10th-Exp-NHD13-Donor-plus-Pooled-Tail-Ref	chr5	121379353	121379353	G	C	Trafd1	c.237+63C>G		intron_variant	MODIFIER	324	0	0.003675	78	28	0.368	6.2247
Aplan-10-3620-Thy_vs_Aplan-10th-Exp-NHD13-Donor-plus-Pooled-Tail-Ref	chr5	122572778	122572778	G	C	Ift81	c.1200C>G	p.Tyr400*	stop_gained	HIGH	307	0	0.004056	80	22	0.257	6.07302
Aplan-10-3620-Thy_vs_Aplan-10th-Exp-NHD13-Donor-plus-Pooled-Tail-Ref	chr5	123810754	123810754	C	G	Kntc1	c.5620-59C>G		intron_variant	MODIFIER	153	0	0.006928	53	12	0.24	7.5181
Aplan-10-3620-Thy_vs_Aplan-10th-Exp-NHD13-Donor-plus-Pooled-Tail-Ref	chr5	124556984	124556984	C	G	Ddx55	c.361C>G	p.Arg121Gly	missense_variant	MODERATE	302	0	0.004069	81	34	0.414	6.32022
Aplan-10-3620-Thy_vs_Aplan-10th-Exp-NHD13-Donor-plus-Pooled-Tail-Ref	chr5	125698571	125698571	G	C	Tmem132b	c.1108G>C	p.Gly370Arg	missense_variant	MODERATE	127	0	0.009232	27	6	0.241	4.75367
Aplan-10-3620-Thy_vs_Aplan-10th-Exp-NHD13-Donor-plus-Pooled-Tail-Ref	chr5	129847019	129847019	C	G	Sumf2	c.24C>G	p.Pro8Pro	synonymous_variant	LOW	269	0	0.004833	33	8	0.269	6.12833
Aplan-10-3620-Thy_vs_Aplan-10th-Exp-NHD13-Donor-plus-Pooled-Tail-Ref	chr5	130246506	130246506	G	C	Tmem248	c.*5208G>C		downstream_gene_variant	MODIFIER	72	0	0.015	39	9	0.235	4.37739
Aplan-10-3620-Thy_vs_Aplan-10th-Exp-NHD13-Donor-plus-Pooled-Tail-Ref	chr5	135736545	135736545	G	C	Mir7034	n.-656C>G		upstream_gene_variant	MODIFIER	310	0	0.003808	56	11	0.215	7.48252
Aplan-10-3620-Thy_vs_Aplan-10th-Exp-NHD13-Donor-plus-Pooled-Tail-Ref	chr5	135786277	135786277	C	G	Mdh2	c.474C>G	p.His158Gln	missense_variant	MODERATE	253	0	0.004743	48	10	0.219	6.52596
Aplan-10-3620-Thy_vs_Aplan-10th-Exp-NHD13-Donor-plus-Pooled-Tail-Ref	chr5	137474158	137474158	G	C	Zan	c.325C>G	p.Arg109Gly	missense_variant	MODERATE	173	0	0.00648	38	16	0.432	6.60466
Aplan-10-3620-Thy_vs_Aplan-10th-Exp-NHD13-Donor-plus-Pooled-Tail-Ref	chr5	137758453	137758453	G	C	Tsc22d4	c.906-231G>C		intron_variant	MODIFIER	200	0	0.005607	41	9	0.231	7.26825
Aplan-10-3620-Thy_vs_Aplan-10th-Exp-NHD13-Donor-plus-Pooled-Tail-Ref	chr5	138304429	138304429	C	G	Stag3	c.3049C>G	p.Pro1017Ala	missense_variant	MODERATE	271	0	0.004535	87	22	0.253	6.01686
Aplan-10-3620-Thy_vs_Aplan-10th-Exp-NHD13-Donor-plus-Pooled-Tail-Ref	chr5	139771176	139771176	C	G	Ints1	c.1386G>C	p.Ala462Ala	synonymous_variant	LOW	154	0	0.00793	39	6	0.2	4.30837
Aplan-10-3620-Thy_vs_Aplan-10th-Exp-NHD13-Donor-plus-Pooled-Tail-Ref	chr5	139806372	139806372	C	G	Tmem184a	c.900G>C	p.Met300Ile	missense_variant	MODERATE	73	0	0.016	40	9	0.206	4.33912
Aplan-10-3620-Thy_vs_Aplan-10th-Exp-NHD13-Donor-plus-Pooled-Tail-Ref	chr5	140563634	140563634	C	G	Grifin	c.326G>C	p.Arg109Pro	missense_variant	MODERATE	125	1	0.009592	21	5	0.299	3.66897
Aplan-10-3620-Thy_vs_Aplan-10th-Exp-NHD13-Donor-plus-Pooled-Tail-Ref	chr5	142543754	142543754	G	C	Radil	c.273C>G	p.Pro91Pro	synonymous_variant	LOW	171	0	0.006967	28	6	0.28	5.3267
Aplan-10-3620-Thy_vs_Aplan-10th-Exp-NHD13-Donor-plus-Pooled-Tail-Ref	chr5	143564063	143564063	C	G	Fam220a	c.*446C>G		3_prime_UTR_variant	MODIFIER	355	0	0.0032	67	17	0.281	6.47329
Aplan-10-3620-Thy_vs_Aplan-10th-Exp-NHD13-Donor-plus-Pooled-Tail-Ref	chr5	143701662	143701662	C	G	Cyth3	c.628C>G	p.Arg210Gly	missense_variant	MODERATE	119	0	0.009791	30	14	0.464	6.01801
Aplan-10-3620-Thy_vs_Aplan-10th-Exp-NHD13-Donor-plus-Pooled-Tail-Ref	chr5	145035830	145035830	C	G	Gm4871	c.-3123G>C		upstream_gene_variant	MODIFIER	156	1	0.00783	34	6	0.241	3.86748
Aplan-10-3620-Thy_vs_Aplan-10th-Exp-NHD13-Donor-plus-Pooled-Tail-Ref	chr5	146090737	146090737	C	G	Cyp3a59	c.317C>G	p.Pro106Arg	missense_variant&splice_region_variant	MODERATE	482	0	0.002554	147	36	0.261	6.21113
Aplan-10-3620-Thy_vs_Aplan-10th-Exp-NHD13-Donor-plus-Pooled-Tail-Ref	chr5	147370482	147370482	G	C	Flt3	c.720C>G	p.Arg240Arg	synonymous_variant	LOW	258	0	0.004748	43	13	0.324	6.5633
Aplan-10-3620-Thy_vs_Aplan-10th-Exp-NHD13-Donor-plus-Pooled-Tail-Ref	chr5	149456905	149456905	G	C	Tex26	c.400G>C	p.Ala134Pro	missense_variant	MODERATE	255	0	0.004762	74	29	0.391	6.69079
Aplan-10-3620-Thy_vs_Aplan-10th-Exp-NHD13-Donor-plus-Pooled-Tail-Ref	chr6	17533933	17533933	G	C	Met	c.1882G>C	p.Ala628Pro	missense_variant	MODERATE	272	1	0.004334	106	24	0.225	6.4743
Aplan-10-3620-Thy_vs_Aplan-10th-Exp-NHD13-Donor-plus-Pooled-Tail-Ref	chr6	28434493	28434493	C	G	Fscn3	c.1066C>G	p.Arg356Gly	missense_variant	MODERATE	152	1	0.017	45	21	0.486	6.86686
Aplan-10-3620-Thy_vs_Aplan-10th-Exp-NHD13-Donor-plus-Pooled-Tail-Ref	chr6	28874836	28874836	C	G	Snd1	c.1780-25C>G		intron_variant	MODIFIER	135	0	0.009252	28	5	0.23	3.9624
Aplan-10-3620-Thy_vs_Aplan-10th-Exp-NHD13-Donor-plus-Pooled-Tail-Ref	chr6	29717566	29717566	C	G	Tspan33	c.780C>G	p.Leu260Leu	synonymous_variant	LOW	115	0	0.00961	34	10	0.29	6.92036
Aplan-10-3620-Thy_vs_Aplan-10th-Exp-NHD13-Donor-plus-Pooled-Tail-Ref	chr6	34159478	34159478	G	C	Slc35b4	c.704C>G	p.Thr235Arg	missense_variant	MODERATE	144	0	0.008214	62	13	0.236	7.19861
Aplan-10-3620-Thy_vs_Aplan-10th-Exp-NHD13-Donor-plus-Pooled-Tail-Ref	chr6	34356326	34356326	C	G	Akr1b8	c.137C>G	p.Ala46Gly	missense_variant	MODERATE	208	0	0.005833	24	7	0.32	7.2771
Aplan-10-3620-Thy_vs_Aplan-10th-Exp-NHD13-Donor-plus-Pooled-Tail-Ref	chr6	34755733	34755733	C	G	Cald1	c.843C>G	p.Arg281Arg	synonymous_variant	LOW	55	0	0.02	19	7	0.356	4.55284
Aplan-10-3620-Thy_vs_Aplan-10th-Exp-NHD13-Donor-plus-Pooled-Tail-Ref	chr6	38481854	38481854	C	G	Ubn2	c.1605C>G	p.Asn535Lys	missense_variant	MODERATE	232	0	0.005528	55	10	0.204	7.48409
Aplan-10-3620-Thy_vs_Aplan-10th-Exp-NHD13-Donor-plus-Pooled-Tail-Ref	chr6	40926201	40926201	C	G	1700074P13Rik	c.236G>C	p.Arg79Pro	missense_variant	MODERATE	130	0	0.008771	49	20	0.413	6.58526
Aplan-10-3620-Thy_vs_Aplan-10th-Exp-NHD13-Donor-plus-Pooled-Tail-Ref	chr6	42539421	42539421	C	G	Olfr455	c.-401G>C		upstream_gene_variant	MODIFIER	549	0	0.002333	150	29	0.217	6.68858
Aplan-10-3620-Thy_vs_Aplan-10th-Exp-NHD13-Donor-plus-Pooled-Tail-Ref	chr6	48905254	48905254	G	C	Aoc1	c.63G>C	p.Thr21Thr	synonymous_variant	LOW	153	1	0.007745	52	9	0.207	4.69847
Aplan-10-3620-Thy_vs_Aplan-10th-Exp-NHD13-Donor-plus-Pooled-Tail-Ref	chr6	48991012	48991012	C	G	Svs1	c.2375C>G	p.Ser792Trp	missense_variant	MODERATE	273	0	0.004411	75	19	0.276	6.11988
Aplan-10-3620-Thy_vs_Aplan-10th-Exp-NHD13-Donor-plus-Pooled-Tail-Ref	chr6	54635770	54635770	C	G	Plekha8	c.1361C>G	p.Ala454Gly	missense_variant&splice_region_variant	MODERATE	712	1	0.003572	159	65	0.393	5.87345
Aplan-10-3620-Thy_vs_Aplan-10th-Exp-NHD13-Donor-plus-Pooled-Tail-Ref	chr6	65098657	65098657	C	G	Smarcad1	c.2115C>G	p.His705Gln	missense_variant	MODERATE	324	0	0.0038	102	25	0.235	6.68995
Aplan-10-3620-Thy_vs_Aplan-10th-Exp-NHD13-Donor-plus-Pooled-Tail-Ref	chr6	67316256	67316256	G	C	Il12rb2	c.1238C>G	p.Ser413Cys	missense_variant	MODERATE	133	0	0.009091	40	8	0.2	5.34157
Aplan-10-3620-Thy_vs_Aplan-10th-Exp-NHD13-Donor-plus-Pooled-Tail-Ref	chr6	73089696	73089696	G	C	Dnah6	c.7690C>G	p.Arg2564Gly	missense_variant	MODERATE	133	0	0.009487	43	8	0.229	5.12709
Aplan-10-3620-Thy_vs_Aplan-10th-Exp-NHD13-Donor-plus-Pooled-Tail-Ref	chr6	73192890	73192890	C	G	Dnah6	c.1056+10G>C		intron_variant	MODIFIER	161	1	0.0074	51	15	0.29	6.11432
Aplan-10-3620-Thy_vs_Aplan-10th-Exp-NHD13-Donor-plus-Pooled-Tail-Ref	chr6	83147704	83147704	C	G	Rtkn	c.426C>G	p.Gly142Gly	splice_region_variant&synonymous_variant	LOW	204	0	0.005732	85	31	0.381	6.34011
Aplan-10-3620-Thy_vs_Aplan-10th-Exp-NHD13-Donor-plus-Pooled-Tail-Ref	chr6	85756540	85756540	C	G	Nat8f3	c.*4555G>C		downstream_gene_variant	MODIFIER	207	0	0.005696	58	16	0.269	6.56766
Aplan-10-3620-Thy_vs_Aplan-10th-Exp-NHD13-Donor-plus-Pooled-Tail-Ref	chr6	85910846	85910846	C	G	Nat8f1	c.131G>C	p.Arg44Pro	missense_variant	MODERATE	153	0	0.006813	68	15	0.222	6.55286
Aplan-10-3620-Thy_vs_Aplan-10th-Exp-NHD13-Donor-plus-Pooled-Tail-Ref	chr6	86629113	86629113	G	C	Asprv1	c.940G>C	p.Gly314Arg	missense_variant	MODERATE	213	0	0.005526	57	14	0.231	6.73237
Aplan-10-3620-Thy_vs_Aplan-10th-Exp-NHD13-Donor-plus-Pooled-Tail-Ref	chr6	86629177	86629177	C	G	Asprv1	c.1004C>G	p.Pro335Arg	missense_variant	MODERATE	169	0	0.006637	51	18	0.39	6.3935
Aplan-10-3620-Thy_vs_Aplan-10th-Exp-NHD13-Donor-plus-Pooled-Tail-Ref	chr6	89357480	89357480	C	T	Plxna1	c.166G>A	p.Glu56Lys	missense_variant	MODERATE	127	0	0.009728	35	12	0.306	6.92161
Aplan-10-3620-Thy_vs_Aplan-10th-Exp-NHD13-Donor-plus-Pooled-Tail-Ref	chr6	91408802	91408802	C	G	Wnt7a	c.168G>C	p.Pro56Pro	synonymous_variant	LOW	178	0	0.006747	44	23	0.469	6.31322
Aplan-10-3620-Thy_vs_Aplan-10th-Exp-NHD13-Donor-plus-Pooled-Tail-Ref	chr6	101151915	101151915	C	G	Pdzrn3	c.1789G>C	p.Ala597Pro	missense_variant	MODERATE	247	0	0.004839	36	9	0.25	6.5715
Aplan-10-3620-Thy_vs_Aplan-10th-Exp-NHD13-Donor-plus-Pooled-Tail-Ref	chr6	108405321	108405321	C	G	Itpr1	c.4252-79C>G		intron_variant	MODIFIER	197	0	0.006522	53	11	0.233	6.08626
Aplan-10-3620-Thy_vs_Aplan-10th-Exp-NHD13-Donor-plus-Pooled-Tail-Ref	chr6	108410791	108410791	C	G	Itpr1	c.4507-18C>G		intron_variant	MODIFIER	536	0	0.002409	43	16	0.378	6.63583
Aplan-10-3620-Thy_vs_Aplan-10th-Exp-NHD13-Donor-plus-Pooled-Tail-Ref	chr6	108485253	108485253	C	G	Itpr1	c.6275C>G	p.Ser2092Trp	missense_variant	MODERATE	216	0	0.005658	78	19	0.289	7.07845
Aplan-10-3620-Thy_vs_Aplan-10th-Exp-NHD13-Donor-plus-Pooled-Tail-Ref	chr6	112727467	112727467	C	G	Srgap3	c.2632G>C	p.Gly878Arg	missense_variant	MODERATE	110	0	0.011	10	5	0.5	5.87867
Aplan-10-3620-Thy_vs_Aplan-10th-Exp-NHD13-Donor-plus-Pooled-Tail-Ref	chr6	113462725	113462725	C	G	Il17re	c.378C>G	p.Leu126Leu	synonymous_variant	LOW	166	0	0.007026	34	8	0.273	6.48212
Aplan-10-3620-Thy_vs_Aplan-10th-Exp-NHD13-Donor-plus-Pooled-Tail-Ref	chr6	113462908	113462908	C	G	Il17re	c.487C>G	p.Arg163Gly	missense_variant	MODERATE	185	0	0.006705	46	11	0.243	6.40851
Aplan-10-3620-Thy_vs_Aplan-10th-Exp-NHD13-Donor-plus-Pooled-Tail-Ref	chr6	113545017	113545017	C	G	Fancd2	c.572C>G	p.Thr191Arg	missense_variant	MODERATE	179	0	0.006699	68	29	0.404	6.10274
Aplan-10-3620-Thy_vs_Aplan-10th-Exp-NHD13-Donor-plus-Pooled-Tail-Ref	chr6	113796288	113796288	C	G	Atp2b2	c.1017G>C	p.Ser339Ser	synonymous_variant	LOW	153	0	0.008143	51	20	0.415	6.03588
Aplan-10-3620-Thy_vs_Aplan-10th-Exp-NHD13-Donor-plus-Pooled-Tail-Ref	chr6	115619882	115619882	G	C	Raf1	c.1571C>G	p.Pro524Arg	missense_variant	MODERATE	318	0	0.003689	75	17	0.238	6.65278
Aplan-10-3620-Thy_vs_Aplan-10th-Exp-NHD13-Donor-plus-Pooled-Tail-Ref	chr6	115792232	115792232	C	G	Cand2	c.2002C>G	p.Arg668Gly	missense_variant	MODERATE	236	0	0.00502	32	8	0.258	7.75181
Aplan-10-3620-Thy_vs_Aplan-10th-Exp-NHD13-Donor-plus-Pooled-Tail-Ref	chr6	115894436	115894436	C	G	Ift122	c.1674+17C>G		intron_variant	MODIFIER	77	0	0.015	15	7	0.434	6.13398
Aplan-10-3620-Thy_vs_Aplan-10th-Exp-NHD13-Donor-plus-Pooled-Tail-Ref	chr6	115905982	115905982	C	G	Ift122	c.2031+26C>G		intron_variant	MODIFIER	139	0	0.008288	40	10	0.257	6.92938
Aplan-10-3620-Thy_vs_Aplan-10th-Exp-NHD13-Donor-plus-Pooled-Tail-Ref	chr6	115915995	115915995	C	G	Ift122	c.2562C>G	p.Asp854Glu	missense_variant	MODERATE	129	0	0.009739	24	6	0.239	5.07869
Aplan-10-3620-Thy_vs_Aplan-10th-Exp-NHD13-Donor-plus-Pooled-Tail-Ref	chr6	119057362	119057362	G	C	Cacna1c	c.203C>G	p.Ala68Gly	missense_variant	MODERATE	242	0	0.004963	38	10	0.263	7.24001
Aplan-10-3620-Thy_vs_Aplan-10th-Exp-NHD13-Donor-plus-Pooled-Tail-Ref	chr6	119440368	119440368	G	C	Wnt5b	c.535C>G	p.Arg179Gly	missense_variant	MODERATE	173	0	0.006831	32	6	0.207	5.0239
Aplan-10-3620-Thy_vs_Aplan-10th-Exp-NHD13-Donor-plus-Pooled-Tail-Ref	chr6	119630747	119630747	C	G	Erc1	c.2793G>C	p.Lys931Asn	missense_variant&splice_region_variant	MODERATE	165	0	0.006928	38	13	0.324	6.80919
Aplan-10-3620-Thy_vs_Aplan-10th-Exp-NHD13-Donor-plus-Pooled-Tail-Ref	chr6	125160602	125160602	C	G	Iffo1	c.1653C>G	p.Ser551Ser	synonymous_variant	LOW	92	0	0.013	39	17	0.452	6.93498
Aplan-10-3620-Thy_vs_Aplan-10th-Exp-NHD13-Donor-plus-Pooled-Tail-Ref	chr6	125173431	125173431	G	C	Ncapd2	c.2630C>G	p.Ala877Gly	missense_variant	MODERATE	121	0	0.009275	31	9	0.322	6.66751
Aplan-10-3620-Thy_vs_Aplan-10th-Exp-NHD13-Donor-plus-Pooled-Tail-Ref	chr6	125281205	125281205	G	C	Tuba3a	c.821C>G	p.Pro274Arg	missense_variant	MODERATE	298	0	0.003882	93	19	0.214	6.54358
Aplan-10-3620-Thy_vs_Aplan-10th-Exp-NHD13-Donor-plus-Pooled-Tail-Ref	chr6	125307427	125307427	C	G	Ltbr	c.1051G>C	p.Gly351Arg	missense_variant	MODERATE	89	0	0.013	30	9	0.271	5.82998
Aplan-10-3620-Thy_vs_Aplan-10th-Exp-NHD13-Donor-plus-Pooled-Tail-Ref	chr6	135023293	135023293	C	G	Ddx47	c.1251C>G	p.His417Gln	missense_variant	MODERATE	72	2	0.034	29	14	0.478	6.8945
Aplan-10-3620-Thy_vs_Aplan-10th-Exp-NHD13-Donor-plus-Pooled-Tail-Ref	chr6	136727864	136727864	C	G	Gucy2c	c.1651G>C	p.Val551Leu	missense_variant	MODERATE	182	0	0.006569	37	10	0.294	6.39259
Aplan-10-3620-Thy_vs_Aplan-10th-Exp-NHD13-Donor-plus-Pooled-Tail-Ref	chr6	140568929	140568929	C	G	Plekha5	c.2154+48C>G		intron_variant	MODIFIER	293	0	0.004156	116	27	0.227	6.36603
Aplan-10-3620-Thy_vs_Aplan-10th-Exp-NHD13-Donor-plus-Pooled-Tail-Ref	chr6	142566276	142566276	G	C	Kcnj8	c.604C>G	p.Arg202Gly	missense_variant	MODERATE	157	0	0.007552	41	9	0.231	6.48561
Aplan-10-3620-Thy_vs_Aplan-10th-Exp-NHD13-Donor-plus-Pooled-Tail-Ref	chr6	142658568	142658568	C	G	Abcc9	c.1940G>C	p.Arg647Pro	missense_variant	MODERATE	436	0	0.002846	91	36	0.383	6.37454
Aplan-10-3620-Thy_vs_Aplan-10th-Exp-NHD13-Donor-plus-Pooled-Tail-Ref	chr6	142682119	142682119	C	G	Abcc9	c.1184G>C	p.Arg395Pro	missense_variant	MODERATE	167	0	0.007283	76	18	0.238	6.65946
Aplan-10-3620-Thy_vs_Aplan-10th-Exp-NHD13-Donor-plus-Pooled-Tail-Ref	chr6	145266350	145266350	C	G	Gm15706-1700073E17Rik	n.145266350C>G		intergenic_region	MODIFIER	175	1	0.006279	42	9	0.249	5.81305
Aplan-10-3620-Thy_vs_Aplan-10th-Exp-NHD13-Donor-plus-Pooled-Tail-Ref	chr6	146589953	146589953	C	G	Fgfr1op2	c.313C>G	p.Arg105Gly	missense_variant	MODERATE	231	0	0.005431	78	25	0.338	6.45065
Aplan-10-3620-Thy_vs_Aplan-10th-Exp-NHD13-Donor-plus-Pooled-Tail-Ref	chr6	148306092	148306092	C	G	Tmtc1	c.1336G>C	p.Gly446Arg	missense_variant	MODERATE	90	0	0.013	30	13	0.464	7.04458
Aplan-10-3620-Thy_vs_Aplan-10th-Exp-NHD13-Donor-plus-Pooled-Tail-Ref	chr7	4546317	4546317	C	G	Syt5	c.-6G>C		5_prime_UTR_variant	MODIFIER	150	0	0.008779	20	9	0.4	7.14054
Aplan-10-3620-Thy_vs_Aplan-10th-Exp-NHD13-Donor-plus-Pooled-Tail-Ref	chr7	10748502	10748502	G	C	Vmn1r71	c.258C>G	p.Phe86Leu	missense_variant	MODERATE	285	0	0.003928	108	23	0.213	6.61254
Aplan-10-3620-Thy_vs_Aplan-10th-Exp-NHD13-Donor-plus-Pooled-Tail-Ref	chr7	15626292	15626292	G	C	Obox3	c.451C>G	p.Arg151Gly	missense_variant	MODERATE	578	0	0.002156	140	25	0.205	6.07591
Aplan-10-3620-Thy_vs_Aplan-10th-Exp-NHD13-Donor-plus-Pooled-Tail-Ref	chr7	15972105	15972105	G	C	Gltscr1	c.4410C>G	p.Ser1470Ser	synonymous_variant	LOW	179	1	0.013	29	11	0.37	6.0075
Aplan-10-3620-Thy_vs_Aplan-10th-Exp-NHD13-Donor-plus-Pooled-Tail-Ref	chr7	16366801	16366801	G	C	Sae1	c.639+6C>G		splice_region_variant&intron_variant	LOW	334	0	0.003786	76	26	0.3	6.27297
Aplan-10-3620-Thy_vs_Aplan-10th-Exp-NHD13-Donor-plus-Pooled-Tail-Ref	chr7	16883174	16883174	C	G	Dact3	c.297C>G	p.Asp99Glu	missense_variant	MODERATE	197	0	0.006572	15	7	0.437	6.54176
Aplan-10-3620-Thy_vs_Aplan-10th-Exp-NHD13-Donor-plus-Pooled-Tail-Ref	chr7	16883434	16883434	C	G	Dact3	c.423C>G	p.Ser141Ser	synonymous_variant	LOW	176	1	0.007274	24	8	0.347	6.95376
Aplan-10-3620-Thy_vs_Aplan-10th-Exp-NHD13-Donor-plus-Pooled-Tail-Ref	chr7	19200595	19200595	C	G	Eml2	c.1275C>G	p.Ser425Ser	synonymous_variant	LOW	95	0	0.013	12	5	0.429	5.12784
Aplan-10-3620-Thy_vs_Aplan-10th-Exp-NHD13-Donor-plus-Pooled-Tail-Ref	chr7	24533862	24533862	C	G	Irgq	c.1127C>G	p.Pro376Arg	missense_variant	MODERATE	180	0	0.006704	25	6	0.25	5.73291
Aplan-10-3620-Thy_vs_Aplan-10th-Exp-NHD13-Donor-plus-Pooled-Tail-Ref	chr7	25303026	25303026	C	G	Prr19	c.148C>G	p.Arg50Gly	missense_variant	MODERATE	163	0	0.007006	41	10	0.275	7.38957
Aplan-10-3620-Thy_vs_Aplan-10th-Exp-NHD13-Donor-plus-Pooled-Tail-Ref	chr7	28565018	28565018	C	G	Pak4	c.458G>C	p.Arg153Pro	missense_variant	MODERATE	176	0	0.006624	20	5	0.235	5.16933
Aplan-10-3620-Thy_vs_Aplan-10th-Exp-NHD13-Donor-plus-Pooled-Tail-Ref	chr7	28882869	28882869	C	G	Capn12	c.407C>G	p.Ala136Gly	missense_variant	MODERATE	252	0	0.004706	49	10	0.213	6.43934
Aplan-10-3620-Thy_vs_Aplan-10th-Exp-NHD13-Donor-plus-Pooled-Tail-Ref	chr7	29008538	29008538	C	T	Ryr1	c.14503-20G>A		intron_variant	MODIFIER	123	0	0.009428	34	11	0.31	6.18285
Aplan-10-3620-Thy_vs_Aplan-10th-Exp-NHD13-Donor-plus-Pooled-Tail-Ref	chr7	29825710	29825710	C	G	Zfp790	c.152C>G	p.Pro51Arg	missense_variant	MODERATE	267	2	0.009185	76	15	0.203	7.01987
Aplan-10-3620-Thy_vs_Aplan-10th-Exp-NHD13-Donor-plus-Pooled-Tail-Ref	chr7	30015136	30015136	G	C	Zfp568	c.437G>C	p.Arg146Thr	missense_variant	MODERATE	284	0	0.004511	76	28	0.373	6.57245
Aplan-10-3620-Thy_vs_Aplan-10th-Exp-NHD13-Donor-plus-Pooled-Tail-Ref	chr7	30972010	30972010	C	G	Lsr	c.297G>C	p.Gln99His	missense_variant	MODERATE	135	0	0.007889	35	11	0.317	6.38888
Aplan-10-3620-Thy_vs_Aplan-10th-Exp-NHD13-Donor-plus-Pooled-Tail-Ref	chr7	30977700	30977700	G	C	Fam187b	c.633G>C	p.Pro211Pro	synonymous_variant	LOW	191	0	0.006441	50	24	0.489	6.55206
Aplan-10-3620-Thy_vs_Aplan-10th-Exp-NHD13-Donor-plus-Pooled-Tail-Ref	chr7	42446484	42446484	G	A	4933421I07Rik	c.384-45C>T		intron_variant	MODIFIER	188	0	0.006108	44	13	0.321	6.66588
Aplan-10-3620-Thy_vs_Aplan-10th-Exp-NHD13-Donor-plus-Pooled-Tail-Ref	chr7	44395934	44395934	C	G	Syt3	c.1597C>G	p.Arg533Gly	missense_variant	MODERATE	162	0	0.00716	39	15	0.382	6.74736
Aplan-10-3620-Thy_vs_Aplan-10th-Exp-NHD13-Donor-plus-Pooled-Tail-Ref	chr7	44541760	44541760	G	C	Pold1	c.646C>G	p.Arg216Gly	missense_variant	MODERATE	147	1	0.008273	26	5	0.221	3.53725
Aplan-10-3620-Thy_vs_Aplan-10th-Exp-NHD13-Donor-plus-Pooled-Tail-Ref	chr7	45045923	45045923	G	C	Prr12	c.4118C>G	p.Ser1373Trp	missense_variant	MODERATE	142	0	0.008224	18	9	0.474	7.38109
Aplan-10-3620-Thy_vs_Aplan-10th-Exp-NHD13-Donor-plus-Pooled-Tail-Ref	chr7	45286887	45286887	G	C	Slc6a21	c.288G>C	p.Met96Ile	missense_variant	MODERATE	109	0	0.01	14	7	0.468	7.31587
Aplan-10-3620-Thy_vs_Aplan-10th-Exp-NHD13-Donor-plus-Pooled-Tail-Ref	chr7	46115729	46115729	G	C	Abcc8	c.3420+45C>G		intron_variant	MODIFIER	92	0	0.014	32	13	0.461	6.81264
Aplan-10-3620-Thy_vs_Aplan-10th-Exp-NHD13-Donor-plus-Pooled-Tail-Ref	chr7	79409182	79409182	C	G	Fanci	c.798C>G	p.His266Gln	missense_variant	MODERATE	205	0	0.006139	62	18	0.294	6.27094
Aplan-10-3620-Thy_vs_Aplan-10th-Exp-NHD13-Donor-plus-Pooled-Tail-Ref	chr7	80220226	80220226	C	G	Sema4b	c.1261C>G	p.Arg421Gly	missense_variant	MODERATE	166	0	0.007152	40	8	0.214	5.9597
Aplan-10-3620-Thy_vs_Aplan-10th-Exp-NHD13-Donor-plus-Pooled-Tail-Ref	chr7	80239360	80239360	C	G	Gdpgp1	c.1138C>G	p.Leu380Val	missense_variant	MODERATE	150	0	0.007442	39	10	0.279	7.29639
Aplan-10-3620-Thy_vs_Aplan-10th-Exp-NHD13-Donor-plus-Pooled-Tail-Ref	chr7	80383982	80383982	G	C	Fes	c.520C>G	p.Arg174Gly	missense_variant	MODERATE	179	0	0.006461	30	5	0.208	4.34679
Aplan-10-3620-Thy_vs_Aplan-10th-Exp-NHD13-Donor-plus-Pooled-Tail-Ref	chr7	84282084	84282084	C	G	Arnt2	c.1164+13G>C		intron_variant	MODIFIER	81	0	0.015	33	7	0.221	3.9837
Aplan-10-3620-Thy_vs_Aplan-10th-Exp-NHD13-Donor-plus-Pooled-Tail-Ref	chr7	98048502	98048502	C	G	Myo7a	c.*3125G>C		downstream_gene_variant	MODIFIER	144	0	0.008266	68	15	0.237	6.29854
Aplan-10-3620-Thy_vs_Aplan-10th-Exp-NHD13-Donor-plus-Pooled-Tail-Ref	chr7	98097507	98097507	G	C	Myo7a	c.616C>G	p.Arg206Gly	missense_variant	MODERATE	193	0	0.00616	40	8	0.216	6.39462
Aplan-10-3620-Thy_vs_Aplan-10th-Exp-NHD13-Donor-plus-Pooled-Tail-Ref	chr7	98451863	98451863	C	G	Gucy2d	c.1392C>G	p.Phe464Leu	missense_variant	MODERATE	112	0	0.011	37	12	0.333	6.21088
Aplan-10-3620-Thy_vs_Aplan-10th-Exp-NHD13-Donor-plus-Pooled-Tail-Ref	chr7	99349156	99349156	G	C	Serpinh1	c.266C>G	p.Ala89Gly	missense_variant	MODERATE	108	1	0.01	26	6	0.24	3.71119
Aplan-10-3620-Thy_vs_Aplan-10th-Exp-NHD13-Donor-plus-Pooled-Tail-Ref	chr7	101404950	101404950	C	G	Arap1	c.3960+525C>G		intron_variant	MODIFIER	225	1	0.005749	40	10	0.279	6.11294
Aplan-10-3620-Thy_vs_Aplan-10th-Exp-NHD13-Donor-plus-Pooled-Tail-Ref	chr7	101554829	101554829	G	C	Art2a-ps	c.501C>G	p.Ser167Ser	synonymous_variant	LOW	372	0	0.003081	108	45	0.413	6.4343
Aplan-10-3620-Thy_vs_Aplan-10th-Exp-NHD13-Donor-plus-Pooled-Tail-Ref	chr7	102430922	102430922	G	C	Stim1	c.1512G>C	p.Thr504Thr	synonymous_variant	LOW	116	0	0.011	17	8	0.47	7.90631
Aplan-10-3620-Thy_vs_Aplan-10th-Exp-NHD13-Donor-plus-Pooled-Tail-Ref	chr7	103947370	103947370	C	G	Olfr633	c.803C>G	p.Ala268Gly	missense_variant	MODERATE	259	0	0.004555	98	22	0.227	6.15142
Aplan-10-3620-Thy_vs_Aplan-10th-Exp-NHD13-Donor-plus-Pooled-Tail-Ref	chr7	106330659	106330659	C	G	Gm8989-Gm4759	n.106330659C>G		intergenic_region	MODIFIER	212	0	0.005697	57	12	0.208	6.76845
Aplan-10-3620-Thy_vs_Aplan-10th-Exp-NHD13-Donor-plus-Pooled-Tail-Ref	chr7	114834891	114834891	G	C	Insc	c.1130G>C	p.Gly377Ala	missense_variant	MODERATE	245	0	0.005045	82	19	0.227	6.265
Aplan-10-3620-Thy_vs_Aplan-10th-Exp-NHD13-Donor-plus-Pooled-Tail-Ref	chr7	121105876	121105876	G	C	Otoa	c.640G>C	p.Ala214Pro	missense_variant	MODERATE	100	0	0.012	24	5	0.227	3.72404
Aplan-10-3620-Thy_vs_Aplan-10th-Exp-NHD13-Donor-plus-Pooled-Tail-Ref	chr7	125575598	125575598	C	G	Il4ra	c.977C>G	p.Pro326Arg	missense_variant	MODERATE	114	0	0.01	25	8	0.333	6.41544
Aplan-10-3620-Thy_vs_Aplan-10th-Exp-NHD13-Donor-plus-Pooled-Tail-Ref	chr7	125641504	125641504	G	C	Gtf3c1	c.*2C>G		3_prime_UTR_variant	MODIFIER	97	0	0.013	34	11	0.333	7.0449
Aplan-10-3620-Thy_vs_Aplan-10th-Exp-NHD13-Donor-plus-Pooled-Tail-Ref	chr7	126587357	126587357	C	G	Apobr	c.2039C>G	p.Thr680Arg	missense_variant	MODERATE	117	0	0.009877	30	14	0.464	7.34561
Aplan-10-3620-Thy_vs_Aplan-10th-Exp-NHD13-Donor-plus-Pooled-Tail-Ref	chr7	126978284	126978284	C	G	Cdipt	c.201C>G	p.Leu67Leu	synonymous_variant	LOW	153	0	0.007894	39	11	0.265	6.39302
Aplan-10-3620-Thy_vs_Aplan-10th-Exp-NHD13-Donor-plus-Pooled-Tail-Ref	chr7	127092650	127092650	C	G	AI467606	c.396C>G	p.Tyr132*	stop_gained	HIGH	187	0	0.006115	34	7	0.233	5.93589
Aplan-10-3620-Thy_vs_Aplan-10th-Exp-NHD13-Donor-plus-Pooled-Tail-Ref	chr7	127473774	127473774	C	G	Prr14	c.315-23C>G		intron_variant	MODIFIER	294	0	0.004134	51	10	0.217	6.80354
Aplan-10-3620-Thy_vs_Aplan-10th-Exp-NHD13-Donor-plus-Pooled-Tail-Ref	chr7	127767542	127767542	C	G	Fbxl19	c.1725C>G	p.His575Gln	missense_variant	MODERATE	170	0	0.007274	32	5	0.214	4.12191
Aplan-10-3620-Thy_vs_Aplan-10th-Exp-NHD13-Donor-plus-Pooled-Tail-Ref	chr7	127767939	127767939	C	G	Fbxl19	c.*9C>G		3_prime_UTR_variant	MODIFIER	180	0	0.006924	18	5	0.333	5.44916
Aplan-10-3620-Thy_vs_Aplan-10th-Exp-NHD13-Donor-plus-Pooled-Tail-Ref	chr7	127886579	127886579	C	G	Prss53	c.1588G>C	p.Ala530Pro	missense_variant	MODERATE	151	0	0.007957	38	8	0.25	5.85163
Aplan-10-3620-Thy_vs_Aplan-10th-Exp-NHD13-Donor-plus-Pooled-Tail-Ref	chr7	128240859	128240859	C	G	Armc5	c.1348C>G	p.Arg450Gly	missense_variant	MODERATE	93	0	0.012	21	8	0.315	6.43209
Aplan-10-3620-Thy_vs_Aplan-10th-Exp-NHD13-Donor-plus-Pooled-Tail-Ref	chr7	131226753	131226753	G	C	5430419D17Rik	c.936G>C	p.Ala312Ala	synonymous_variant	LOW	242	0	0.005135	87	17	0.221	7.15734
Aplan-10-3620-Thy_vs_Aplan-10th-Exp-NHD13-Donor-plus-Pooled-Tail-Ref	chr7	133702418	133702418	C	G	Uros	c.-26G>C		5_prime_UTR_variant	MODIFIER	115	0	0.01	20	8	0.389	7.24509
Aplan-10-3620-Thy_vs_Aplan-10th-Exp-NHD13-Donor-plus-Pooled-Tail-Ref	chr7	140037604	140037604	C	G	Zfp511	c.518C>G	p.Ala173Gly	missense_variant	MODERATE	141	0	0.008656	43	11	0.289	7.41966
Aplan-10-3620-Thy_vs_Aplan-10th-Exp-NHD13-Donor-plus-Pooled-Tail-Ref	chr7	140072589	140072589	C	G	Caly	c.245G>C	p.Arg82Pro	missense_variant	MODERATE	171	0	0.007105	47	10	0.22	7.01966
Aplan-10-3620-Thy_vs_Aplan-10th-Exp-NHD13-Donor-plus-Pooled-Tail-Ref	chr7	140897429	140897429	C	G	Psmd13	c.850C>G	p.Arg284Gly	missense_variant	MODERATE	267	0	0.004405	67	13	0.207	6.23721
Aplan-10-3620-Thy_vs_Aplan-10th-Exp-NHD13-Donor-plus-Pooled-Tail-Ref	chr7	140955688	140955688	G	C	Ifitm2	c.228C>G	p.Ala76Ala	synonymous_variant	LOW	374	0	0.003283	76	25	0.347	6.2281
Aplan-10-3620-Thy_vs_Aplan-10th-Exp-NHD13-Donor-plus-Pooled-Tail-Ref	chr7	140969599	140969599	C	G	Ifitm1	c.294C>G	p.Val98Val	synonymous_variant	LOW	388	0	0.003334	86	23	0.278	6.44147
Aplan-10-3620-Thy_vs_Aplan-10th-Exp-NHD13-Donor-plus-Pooled-Tail-Ref	chr7	142576582	142576582	G	C	Mir675	n.*482C>G		downstream_gene_variant	MODIFIER	78	0	0.014	29	8	0.208	4.88048
Aplan-10-3620-Thy_vs_Aplan-10th-Exp-NHD13-Donor-plus-Pooled-Tail-Ref	chr8	10633526	10633526	C	G	Myo16	c.5636C>G	p.Ala1879Gly	missense_variant	MODERATE	52	0	0.024	23	8	0.381	4.53667
Aplan-10-3620-Thy_vs_Aplan-10th-Exp-NHD13-Donor-plus-Pooled-Tail-Ref	chr8	11454270	11454270	C	G	Rab20	c.429G>C	p.Lys143Asn	missense_variant	MODERATE	159	0	0.007433	38	8	0.206	5.99834
Aplan-10-3620-Thy_vs_Aplan-10th-Exp-NHD13-Donor-plus-Pooled-Tail-Ref	chr8	11454323	11454323	C	G	Rab20	c.376G>C	p.Gly126Arg	missense_variant	MODERATE	129	0	0.009213	32	7	0.218	5.16083
Aplan-10-3620-Thy_vs_Aplan-10th-Exp-NHD13-Donor-plus-Pooled-Tail-Ref	chr8	13011519	13011519	C	G	Mcf2l	c.2517C>G	p.Ala839Ala	synonymous_variant	LOW	117	0	0.009752	35	8	0.257	5.39615
Aplan-10-3620-Thy_vs_Aplan-10th-Exp-NHD13-Donor-plus-Pooled-Tail-Ref	chr8	13079887	13079887	G	C	Pcid2	c.860+8C>G		splice_region_variant&intron_variant	LOW	239	1	0.01	84	43	0.483	5.9777
Aplan-10-3620-Thy_vs_Aplan-10th-Exp-NHD13-Donor-plus-Pooled-Tail-Ref	chr8	13177107	13177107	C	G	Grtp1	c.975G>C	p.Thr325Thr	synonymous_variant	LOW	106	0	0.012	15	8	0.533	6.11619
Aplan-10-3620-Thy_vs_Aplan-10th-Exp-NHD13-Donor-plus-Pooled-Tail-Ref	chr8	13248671	13248671	G	C	Adprhl1	c.258C>G	p.Tyr86*	stop_gained	HIGH	161	0	0.006912	17	7	0.449	7.70976
Aplan-10-3620-Thy_vs_Aplan-10th-Exp-NHD13-Donor-plus-Pooled-Tail-Ref	chr8	13386676	13386676	G	C	Atp4b	c.835C>G	p.His279Asp	missense_variant	MODERATE	128	0	0.009789	30	11	0.407	6.83832
Aplan-10-3620-Thy_vs_Aplan-10th-Exp-NHD13-Donor-plus-Pooled-Tail-Ref	chr8	13766444	13766444	C	G	Cdc16	c.794C>G	p.Ala265Gly	missense_variant	MODERATE	308	0	0.004244	121	22	0.211	6.92255
Aplan-10-3620-Thy_vs_Aplan-10th-Exp-NHD13-Donor-plus-Pooled-Tail-Ref	chr8	19142591	19142591	C	G	Spag11b	c.212-25C>G		intron_variant	MODIFIER	226	0	0.005272	65	16	0.259	6.40381
Aplan-10-3620-Thy_vs_Aplan-10th-Exp-NHD13-Donor-plus-Pooled-Tail-Ref	chr8	21163156	21163156	G	C	Defa22	c.*1G>C		3_prime_UTR_variant	MODIFIER	535	0	0.002261	126	27	0.233	6.47109
Aplan-10-3620-Thy_vs_Aplan-10th-Exp-NHD13-Donor-plus-Pooled-Tail-Ref	chr8	22065562	22065562	C	G	Alg11	c.838C>G	p.Pro280Ala	missense_variant	MODERATE	366	0	0.003109	99	24	0.259	5.99289
Aplan-10-3620-Thy_vs_Aplan-10th-Exp-NHD13-Donor-plus-Pooled-Tail-Ref	chr8	23174528	23174528	C	G	Gpat4	c.*24G>C		3_prime_UTR_variant	MODIFIER	268	0	0.004857	59	19	0.326	6.13244
Aplan-10-3620-Thy_vs_Aplan-10th-Exp-NHD13-Donor-plus-Pooled-Tail-Ref	chr8	25683127	25683127	C	G	Whsc1l1	c.2471-25C>G		intron_variant	MODIFIER	207	0	0.005457	60	15	0.264	7.05103
Aplan-10-3620-Thy_vs_Aplan-10th-Exp-NHD13-Donor-plus-Pooled-Tail-Ref	chr8	25722501	25722501	C	G	Plpp5	c.523C>G	p.Arg175Gly	missense_variant	MODERATE	199	0	0.006336	58	13	0.255	7.14408
Aplan-10-3620-Thy_vs_Aplan-10th-Exp-NHD13-Donor-plus-Pooled-Tail-Ref	chr8	25913671	25913671	C	G	Kcnu1	c.2209C>G	p.Arg737Gly	missense_variant	MODERATE	175	0	0.007294	58	13	0.25	6.63129
Aplan-10-3620-Thy_vs_Aplan-10th-Exp-NHD13-Donor-plus-Pooled-Tail-Ref	chr8	27121628	27121628	G	C	Adgra2	c.3604G>C	p.Ala1202Pro	missense_variant	MODERATE	62	0	0.018	14	6	0.417	4.86213
Aplan-10-3620-Thy_vs_Aplan-10th-Exp-NHD13-Donor-plus-Pooled-Tail-Ref	chr8	29417489	29417489	G	A	Unc5d-4933433F19Rik	n.29417489G>A		intergenic_region	MODIFIER	216	0	0.005655	72	21	0.291	6.39272
Aplan-10-3620-Thy_vs_Aplan-10th-Exp-NHD13-Donor-plus-Pooled-Tail-Ref	chr8	32477234	32477234	G	C	Gm8179-Gm3985	n.32477234G>C		intergenic_region	MODIFIER	457	0	0.002543	139	30	0.235	6.60696
Aplan-10-3620-Thy_vs_Aplan-10th-Exp-NHD13-Donor-plus-Pooled-Tail-Ref	chr8	33638496	33638496	C	G	Ubxn8	c.195G>C	p.Ser65Ser	synonymous_variant	LOW	71	0	0.017	32	7	0.249	3.76987
Aplan-10-3620-Thy_vs_Aplan-10th-Exp-NHD13-Donor-plus-Pooled-Tail-Ref	chr8	34124674	34124674	C	G	Mboat4	c.1264C>G	p.Leu422Val	missense_variant	MODERATE	258	0	0.004662	69	14	0.206	6.66016
Aplan-10-3620-Thy_vs_Aplan-10th-Exp-NHD13-Donor-plus-Pooled-Tail-Ref	chr8	45794978	45794978	G	C	Sorbs2	c.1265G>C	p.Gly422Ala	missense_variant&splice_region_variant	MODERATE	127	0	0.009091	44	13	0.302	6.59533
Aplan-10-3620-Thy_vs_Aplan-10th-Exp-NHD13-Donor-plus-Pooled-Tail-Ref	chr8	46493025	46493025	C	G	Acsl1	c.194C>G	p.Ala65Gly	missense_variant&splice_region_variant	MODERATE	166	0	0.006799	42	11	0.282	6.38532
Aplan-10-3620-Thy_vs_Aplan-10th-Exp-NHD13-Donor-plus-Pooled-Tail-Ref	chr8	46505772	46505772	C	G	Acsl1	c.313+6C>G		splice_region_variant&intron_variant	LOW	205	0	0.006235	66	15	0.222	6.55957
Aplan-10-3620-Thy_vs_Aplan-10th-Exp-NHD13-Donor-plus-Pooled-Tail-Ref	chr8	46846145	46846145	C	G	Irf2	c.973C>G	p.Arg325Gly	missense_variant	MODERATE	95	0	0.012	24	9	0.375	6.86909
Aplan-10-3620-Thy_vs_Aplan-10th-Exp-NHD13-Donor-plus-Pooled-Tail-Ref	chr8	61495033	61495033	G	C	Cbr4	c.398-35G>C		intron_variant	MODIFIER	203	0	0.006316	53	18	0.311	7.03571
Aplan-10-3620-Thy_vs_Aplan-10th-Exp-NHD13-Donor-plus-Pooled-Tail-Ref	chr8	69882898	69882898	C	G	Cilp2	c.1449G>C	p.Ala483Ala	synonymous_variant	LOW	89	0	0.012	15	7	0.429	6.51867
Aplan-10-3620-Thy_vs_Aplan-10th-Exp-NHD13-Donor-plus-Pooled-Tail-Ref	chr8	69883203	69883203	C	G	Cilp2	c.1144G>C	p.Gly382Arg	missense_variant	MODERATE	222	0	0.005519	21	9	0.388	6.3835
Aplan-10-3620-Thy_vs_Aplan-10th-Exp-NHD13-Donor-plus-Pooled-Tail-Ref	chr8	70098152	70098152	C	G	Ncan	c.3391G>C	p.Ala1131Pro	missense_variant	MODERATE	193	0	0.006472	32	6	0.206	5.26935
Aplan-10-3620-Thy_vs_Aplan-10th-Exp-NHD13-Donor-plus-Pooled-Tail-Ref	chr8	70107705	70107705	C	G	Ncan	c.2611G>C	p.Glu871Gln	missense_variant	MODERATE	152	0	0.007919	32	9	0.327	7.28937
Aplan-10-3620-Thy_vs_Aplan-10th-Exp-NHD13-Donor-plus-Pooled-Tail-Ref	chr8	70285452	70285452	C	G	Homer3	c.73C>G	p.Arg25Gly	missense_variant	MODERATE	155	0	0.007442	48	16	0.286	6.24462
Aplan-10-3620-Thy_vs_Aplan-10th-Exp-NHD13-Donor-plus-Pooled-Tail-Ref	chr8	71655102	71655102	C	G	Unc13a	c.1623+31G>C		intron_variant	MODIFIER	192	0	0.006214	25	6	0.262	5.88293
Aplan-10-3620-Thy_vs_Aplan-10th-Exp-NHD13-Donor-plus-Pooled-Tail-Ref	chr8	71685437	71685437	C	G	Jak3	c.2531C>G	p.Thr844Arg	missense_variant	MODERATE	152	0	0.007559	24	7	0.273	6.42448
Aplan-10-3620-Thy_vs_Aplan-10th-Exp-NHD13-Donor-plus-Pooled-Tail-Ref	chr8	72319076	72319076	C	G	Klf2	c.-2C>G		5_prime_UTR_variant	MODIFIER	124	2	0.021	15	7	0.4	5.91463
Aplan-10-3620-Thy_vs_Aplan-10th-Exp-NHD13-Donor-plus-Pooled-Tail-Ref	chr8	72657143	72657143	G	C	Nwd1	c.167G>C	p.Arg56Pro	missense_variant	MODERATE	188	0	0.006331	69	20	0.281	6.46914
Aplan-10-3620-Thy_vs_Aplan-10th-Exp-NHD13-Donor-plus-Pooled-Tail-Ref	chr8	77720367	77720367	G	C	Ednra	c.81C>G	p.Ser27Arg	missense_variant	MODERATE	185	1	0.013	47	10	0.231	6.3255
Aplan-10-3620-Thy_vs_Aplan-10th-Exp-NHD13-Donor-plus-Pooled-Tail-Ref	chr8	80618258	80618258	G	C	Frem3	c.5209G>C	p.Ala1737Pro	missense_variant	MODERATE	206	0	0.006251	70	18	0.213	6.84662
Aplan-10-3620-Thy_vs_Aplan-10th-Exp-NHD13-Donor-plus-Pooled-Tail-Ref	chr8	82767374	82767374	C	G	Zfp330	c.292-35G>C		intron_variant	MODIFIER	162	0	0.00744	45	13	0.295	6.00923
Aplan-10-3620-Thy_vs_Aplan-10th-Exp-NHD13-Donor-plus-Pooled-Tail-Ref	chr8	83938991	83938991	C	G	Adgrl1	c.4306C>G	p.Arg1436Gly	missense_variant	MODERATE	47	0	0.025	14	6	0.462	4.26694
Aplan-10-3620-Thy_vs_Aplan-10th-Exp-NHD13-Donor-plus-Pooled-Tail-Ref	chr8	84003290	84003290	C	G	1700067K01Rik	c.408-6C>G		splice_region_variant&intron_variant	LOW	299	0	0.003956	50	19	0.396	6.30027
Aplan-10-3620-Thy_vs_Aplan-10th-Exp-NHD13-Donor-plus-Pooled-Tail-Ref	chr8	84176285	84176285	G	C	Nanos3	c.247C>G	p.Leu83Val	missense_variant	MODERATE	118	1	0.009843	31	10	0.346	6.41391
Aplan-10-3620-Thy_vs_Aplan-10th-Exp-NHD13-Donor-plus-Pooled-Tail-Ref	chr8	84837965	84837965	G	C	Gadd45gip1	c.*3539G>C		downstream_gene_variant	MODIFIER	141	0	0.007245	30	14	0.536	6.67159
Aplan-10-3620-Thy_vs_Aplan-10th-Exp-NHD13-Donor-plus-Pooled-Tail-Ref	chr8	85287719	85287719	G	C	Vps35	c.300C>G	p.Tyr100*	stop_gained	HIGH	364	0	0.003529	128	49	0.376	5.93444
Aplan-10-3620-Thy_vs_Aplan-10th-Exp-NHD13-Donor-plus-Pooled-Tail-Ref	chr8	86509818	86509818	C	G	Abcc12	c.3366G>C	p.Pro1122Pro	synonymous_variant	LOW	283	0	0.004392	71	14	0.201	6.91028
Aplan-10-3620-Thy_vs_Aplan-10th-Exp-NHD13-Donor-plus-Pooled-Tail-Ref	chr8	87783094	87783094	G	C	Zfp423	c.621C>G	p.Cys207Trp	missense_variant	MODERATE	140	1	0.008232	28	11	0.37	6.73237
Aplan-10-3620-Thy_vs_Aplan-10th-Exp-NHD13-Donor-plus-Pooled-Tail-Ref	chr8	94575791	94575791	G	C	Fam192a	c.611C>G	p.Ser204Trp	missense_variant	MODERATE	121	0	0.009428	29	8	0.32	6.08808
Aplan-10-3620-Thy_vs_Aplan-10th-Exp-NHD13-Donor-plus-Pooled-Tail-Ref	chr8	95709122	95709122	C	G	Ndrg4	c.556C>G	p.Arg186Gly	missense_variant	MODERATE	148	0	0.007591	26	8	0.25	7.0542
Aplan-10-3620-Thy_vs_Aplan-10th-Exp-NHD13-Donor-plus-Pooled-Tail-Ref	chr8	105274853	105274853	C	G	Hsf4	c.1194C>G	p.Leu398Leu	synonymous_variant	LOW	393	1	0.006111	64	14	0.229	6.79951
Aplan-10-3620-Thy_vs_Aplan-10th-Exp-NHD13-Donor-plus-Pooled-Tail-Ref	chr8	105353481	105353481	G	C	Slc9a5	c.255G>C	p.Leu85Phe	missense_variant	MODERATE	214	0	0.005483	37	9	0.206	6.05071
Aplan-10-3620-Thy_vs_Aplan-10th-Exp-NHD13-Donor-plus-Pooled-Tail-Ref	chr8	105390293	105390293	G	C	Kctd19	c.1203C>G	p.Pro401Pro	synonymous_variant	LOW	95	0	0.012	30	15	0.517	7.21803
Aplan-10-3620-Thy_vs_Aplan-10th-Exp-NHD13-Donor-plus-Pooled-Tail-Ref	chr8	105615016	105615016	C	G	Fam65a	c.331C>G	p.Arg111Gly	missense_variant	MODERATE	117	0	0.01	33	10	0.303	7.10159
Aplan-10-3620-Thy_vs_Aplan-10th-Exp-NHD13-Donor-plus-Pooled-Tail-Ref	chr8	105621302	105621302	C	G	Fam65a	c.3391C>G	p.Arg1131Gly	missense_variant	MODERATE	240	0	0.004667	45	14	0.318	6.90742
Aplan-10-3620-Thy_vs_Aplan-10th-Exp-NHD13-Donor-plus-Pooled-Tail-Ref	chr8	105913338	105913338	C	G	Pskh1	c.649C>G	p.Arg217Gly	missense_variant	MODERATE	207	0	0.005568	55	13	0.229	6.09007
Aplan-10-3620-Thy_vs_Aplan-10th-Exp-NHD13-Donor-plus-Pooled-Tail-Ref	chr8	106878779	106878779	G	C	Has3	c.1616G>C	p.Arg539Thr	missense_variant	MODERATE	160	0	0.007302	41	14	0.357	7.08895
Aplan-10-3620-Thy_vs_Aplan-10th-Exp-NHD13-Donor-plus-Pooled-Tail-Ref	chr8	109959855	109959855	C	G	Marveld3	c.393-15G>C		intron_variant	MODIFIER	137	0	0.008875	41	10	0.243	6.78299
Aplan-10-3620-Thy_vs_Aplan-10th-Exp-NHD13-Donor-plus-Pooled-Tail-Ref	chr8	110728689	110728689	C	G	Mtss1l	c.458-39C>G		intron_variant	MODIFIER	22	0	0.044	14	10	0.636	5.40472
Aplan-10-3620-Thy_vs_Aplan-10th-Exp-NHD13-Donor-plus-Pooled-Tail-Ref	chr8	111451052	111451052	C	G	Wdr59	c.2774G>C	p.Arg925Pro	missense_variant	MODERATE	83	0	0.014	27	9	0.348	5.99595
Aplan-10-3620-Thy_vs_Aplan-10th-Exp-NHD13-Donor-plus-Pooled-Tail-Ref	chr8	112003425	112003425	G	C	Kars	c.319C>G	p.Arg107Gly	missense_variant	MODERATE	138	0	0.009456	24	8	0.381	7.12778
Aplan-10-3620-Thy_vs_Aplan-10th-Exp-NHD13-Donor-plus-Pooled-Tail-Ref	chr8	113736900	113736900	G	C	Adamts18	c.2313C>G	p.Pro771Pro	synonymous_variant	LOW	101	1	0.013	38	13	0.375	7.02227
Aplan-10-3620-Thy_vs_Aplan-10th-Exp-NHD13-Donor-plus-Pooled-Tail-Ref	chr8	121535486	121535486	C	G	1700018B08Rik	c.306G>C	p.Pro102Pro	synonymous_variant	LOW	237	0	0.005227	31	9	0.333	6.95807
Aplan-10-3620-Thy_vs_Aplan-10th-Exp-NHD13-Donor-plus-Pooled-Tail-Ref	chr8	122333765	122333765	G	C	Zfpm1	c.592G>C	p.Gly198Arg	missense_variant	MODERATE	133	1	0.01	30	5	0.209	3.08429
Aplan-10-3620-Thy_vs_Aplan-10th-Exp-NHD13-Donor-plus-Pooled-Tail-Ref	chr8	122451273	122451273	C	G	9330133O14Rik	n.*4797C>G		downstream_gene_variant	MODIFIER	188	0	0.006489	37	7	0.243	5.70927
Aplan-10-3620-Thy_vs_Aplan-10th-Exp-NHD13-Donor-plus-Pooled-Tail-Ref	chr8	122620870	122620870	C	G	Pabpn1l	c.617G>C	p.Ser206Thr	missense_variant	MODERATE	194	2	0.013	46	9	0.225	5.14915
Aplan-10-3620-Thy_vs_Aplan-10th-Exp-NHD13-Donor-plus-Pooled-Tail-Ref	chr8	123062978	123062978	G	C	Spg7	c.-2549G>C		upstream_gene_variant	MODIFIER	90	1	0.028	35	8	0.267	3.8442
Aplan-10-3620-Thy_vs_Aplan-10th-Exp-NHD13-Donor-plus-Pooled-Tail-Ref	chr8	123307105	123307105	C	G	Fanca	c.817+25G>C		intron_variant	MODIFIER	173	0	0.007362	35	6	0.234	4.80909
Aplan-10-3620-Thy_vs_Aplan-10th-Exp-NHD13-Donor-plus-Pooled-Tail-Ref	chr8	124874368	124874368	C	G	Gnpat	c.565+20C>G		intron_variant	MODIFIER	244	0	0.005125	50	12	0.239	6.34443
Aplan-10-3620-Thy_vs_Aplan-10th-Exp-NHD13-Donor-plus-Pooled-Tail-Ref	chr8	125447657	125447657	C	G	Sipa1l2	c.3881G>C	p.Arg1294Pro	missense_variant	MODERATE	118	0	0.009464	39	8	0.235	5.09392
Aplan-10-3620-Thy_vs_Aplan-10th-Exp-NHD13-Donor-plus-Pooled-Tail-Ref	chr8	126851078	126851078	G	C	Irf2bp2-Tomm20	n.126851078G>C		intergenic_region	MODIFIER	83	0	0.014	45	7	0.21	3.31869
Aplan-10-3620-Thy_vs_Aplan-10th-Exp-NHD13-Donor-plus-Pooled-Tail-Ref	chr8	128497825	128497825	G	C	Nrp1	c.2068G>C	p.Gly690Arg	missense_variant	MODERATE	118	0	0.009934	42	12	0.258	7.54182
Aplan-10-3620-Thy_vs_Aplan-10th-Exp-NHD13-Donor-plus-Pooled-Tail-Ref	chr9	3411448	3411448	C	G	Cwf19l2	c.324C>G	p.Ser108Ser	synonymous_variant	LOW	91	0	0.014	33	9	0.277	5.56575
Aplan-10-3620-Thy_vs_Aplan-10th-Exp-NHD13-Donor-plus-Pooled-Tail-Ref	chr9	21035569	21035569	C	G	Icam5	c.1392C>G	p.Leu464Leu	synonymous_variant	LOW	114	0	0.009793	33	14	0.419	6.7532
Aplan-10-3620-Thy_vs_Aplan-10th-Exp-NHD13-Donor-plus-Pooled-Tail-Ref	chr9	21346731	21346731	C	G	Slc44a2	c.1276C>G	p.Arg426Gly	missense_variant	MODERATE	245	0	0.004923	43	8	0.243	6.86563
Aplan-10-3620-Thy_vs_Aplan-10th-Exp-NHD13-Donor-plus-Pooled-Tail-Ref	chr9	22076626	22076626	C	G	Ecsit	c.116G>C	p.Arg39Pro	missense_variant	MODERATE	165	0	0.007284	47	12	0.256	6.63169
Aplan-10-3620-Thy_vs_Aplan-10th-Exp-NHD13-Donor-plus-Pooled-Tail-Ref	chr9	32259547	32259547	C	G	Arhgap32	c.4669C>G	p.Arg1557Gly	missense_variant	MODERATE	300	0	0.003725	85	32	0.383	6.58499
Aplan-10-3620-Thy_vs_Aplan-10th-Exp-NHD13-Donor-plus-Pooled-Tail-Ref	chr9	44683104	44683104	C	G	Treh	c.664C>G	p.Pro222Ala	missense_variant	MODERATE	273	0	0.004024	76	17	0.232	7.12235
Aplan-10-3620-Thy_vs_Aplan-10th-Exp-NHD13-Donor-plus-Pooled-Tail-Ref	chr9	44684629	44684629	G	C	Treh	c.1215G>C	p.Lys405Asn	missense_variant	MODERATE	130	1	0.017	35	7	0.249	4.10637
Aplan-10-3620-Thy_vs_Aplan-10th-Exp-NHD13-Donor-plus-Pooled-Tail-Ref	chr9	45928637	45928637	C	G	Pcsk7	c.2122C>G	p.Arg708Gly	missense_variant	MODERATE	158	0	0.006985	37	13	0.326	6.76116
Aplan-10-3620-Thy_vs_Aplan-10th-Exp-NHD13-Donor-plus-Pooled-Tail-Ref	chr9	46270260	46270260	C	G	Apoa5	c.633C>G	p.His211Gln	missense_variant	MODERATE	103	0	0.011	30	11	0.333	6.07849
Aplan-10-3620-Thy_vs_Aplan-10th-Exp-NHD13-Donor-plus-Pooled-Tail-Ref	chr9	50870217	50870217	C	G	Ppp2r1b	c.1319C>G	p.Pro440Arg	missense_variant	MODERATE	166	0	0.007106	31	11	0.367	6.0619
Aplan-10-3620-Thy_vs_Aplan-10th-Exp-NHD13-Donor-plus-Pooled-Tail-Ref	chr9	55980809	55980809	C	G	4930563M21Rik	c.80G>C	p.Arg27Pro	missense_variant	MODERATE	256	0	0.004767	94	58	0.585	5.94109
Aplan-10-3620-Thy_vs_Aplan-10th-Exp-NHD13-Donor-plus-Pooled-Tail-Ref	chr9	56045227	56045227	G	C	Rcn2	c.355G>C	p.Ala119Pro	missense_variant	MODERATE	217	0	0.005867	74	16	0.215	6.8744
Aplan-10-3620-Thy_vs_Aplan-10th-Exp-NHD13-Donor-plus-Pooled-Tail-Ref	chr9	56620942	56620942	C	G	Lingo1	c.380G>C	p.Arg127Pro	missense_variant	MODERATE	165	0	0.006795	38	14	0.406	6.20059
Aplan-10-3620-Thy_vs_Aplan-10th-Exp-NHD13-Donor-plus-Pooled-Tail-Ref	chr9	56885983	56885983	G	C	Cspg4	c.1001G>C	p.Arg334Pro	missense_variant	MODERATE	218	1	0.005459	47	14	0.283	7.09127
Aplan-10-3620-Thy_vs_Aplan-10th-Exp-NHD13-Donor-plus-Pooled-Tail-Ref	chr9	56898325	56898325	C	G	Cspg4	c.6419C>G	p.Thr2140Ser	missense_variant	MODERATE	209	0	0.00545	33	9	0.275	6.3608
Aplan-10-3620-Thy_vs_Aplan-10th-Exp-NHD13-Donor-plus-Pooled-Tail-Ref	chr9	56898847	56898847	G	C	Cspg4	c.6941G>C	p.Arg2314Pro	missense_variant	MODERATE	112	0	0.01	40	8	0.25	4.88192
Aplan-10-3620-Thy_vs_Aplan-10th-Exp-NHD13-Donor-plus-Pooled-Tail-Ref	chr9	57681004	57681004	G	C	Cyp1a2	c.936C>G	p.Ile312Met	missense_variant	MODERATE	127	0	0.009385	53	26	0.442	6.13672
Aplan-10-3620-Thy_vs_Aplan-10th-Exp-NHD13-Donor-plus-Pooled-Tail-Ref	chr9	60848653	60848653	C	G	Uaca	c.339C>G	p.Tyr113*	stop_gained	HIGH	194	0	0.006991	56	14	0.239	6.43528
Aplan-10-3620-Thy_vs_Aplan-10th-Exp-NHD13-Donor-plus-Pooled-Tail-Ref	chr9	63953872	63953872	C	G	Smad6	c.1140G>C	p.Ser380Ser	synonymous_variant	LOW	128	0	0.009283	16	6	0.4	6.14349
Aplan-10-3620-Thy_vs_Aplan-10th-Exp-NHD13-Donor-plus-Pooled-Tail-Ref	chr9	64311445	64311445	C	G	Dis3l	c.2201+1G>C		splice_donor_variant&intron_variant	HIGH	117	0	0.009726	33	10	0.311	7.10159
Aplan-10-3620-Thy_vs_Aplan-10th-Exp-NHD13-Donor-plus-Pooled-Tail-Ref	chr9	64851201	64851201	C	G	Dennd4a	c.632-11C>G		intron_variant	MODIFIER	243	0	0.004938	88	23	0.277	6.95528
Aplan-10-3620-Thy_vs_Aplan-10th-Exp-NHD13-Donor-plus-Pooled-Tail-Ref	chr9	66220658	66220658	C	G	Dapk2	c.217C>G	p.Arg73Gly	missense_variant	MODERATE	100	0	0.012	25	10	0.4	7.73449
Aplan-10-3620-Thy_vs_Aplan-10th-Exp-NHD13-Donor-plus-Pooled-Tail-Ref	chr9	66445534	66445534	C	G	Herc1	c.6301C>G	p.Arg2101Gly	missense_variant	MODERATE	225	0	0.005354	116	26	0.25	6.30743
Aplan-10-3620-Thy_vs_Aplan-10th-Exp-NHD13-Donor-plus-Pooled-Tail-Ref	chr9	67913258	67913258	C	G	Vps13c	c.3482C>G	p.Pro1161Arg	missense_variant	MODERATE	283	2	0.008641	74	16	0.219	6.85071
Aplan-10-3620-Thy_vs_Aplan-10th-Exp-NHD13-Donor-plus-Pooled-Tail-Ref	chr9	69416272	69416272	C	G	Ice2	c.2048C>G	p.Pro683Arg	missense_variant	MODERATE	164	1	0.014	41	17	0.389	6.22963
Aplan-10-3620-Thy_vs_Aplan-10th-Exp-NHD13-Donor-plus-Pooled-Tail-Ref	chr9	73122366	73122366	C	G	Rsl24d1	c.*29C>G		3_prime_UTR_variant	MODIFIER	388	1	0.003049	86	21	0.256	6.83138
Aplan-10-3620-Thy_vs_Aplan-10th-Exp-NHD13-Donor-plus-Pooled-Tail-Ref	chr9	73175442	73175442	C	G	Rsl24d1-Unc13c	n.73175442C>G		intergenic_region	MODIFIER	166	0	0.007194	47	10	0.209	6.91672
Aplan-10-3620-Thy_vs_Aplan-10th-Exp-NHD13-Donor-plus-Pooled-Tail-Ref	chr9	75266989	75266989	C	G	Myo5c	c.1663-36C>G		intron_variant	MODIFIER	106	0	0.011	28	11	0.44	6.4639
Aplan-10-3620-Thy_vs_Aplan-10th-Exp-NHD13-Donor-plus-Pooled-Tail-Ref	chr9	75269579	75269579	C	G	Myo5c	c.1805C>G	p.Ala602Gly	missense_variant	MODERATE	244	1	0.005241	63	11	0.22	6.8863
Aplan-10-3620-Thy_vs_Aplan-10th-Exp-NHD13-Donor-plus-Pooled-Tail-Ref	chr9	79700419	79700419	G	C	Col12a1	c.1126C>G	p.Arg376Gly	missense_variant	MODERATE	156	0	0.007271	56	14	0.26	6.95975
Aplan-10-3620-Thy_vs_Aplan-10th-Exp-NHD13-Donor-plus-Pooled-Tail-Ref	chr9	86825067	86825067	G	A	Snap91	c.669C>T	p.Phe223Phe	synonymous_variant	LOW	201	0	0.005893	72	32	0.45	6.15394
Aplan-10-3620-Thy_vs_Aplan-10th-Exp-NHD13-Donor-plus-Pooled-Tail-Ref	chr9	87016303	87016303	G	C	Ripply2	c.199G>C	p.Gly67Arg	missense_variant	MODERATE	128	0	0.009345	54	11	0.215	6.14477
Aplan-10-3620-Thy_vs_Aplan-10th-Exp-NHD13-Donor-plus-Pooled-Tail-Ref	chr9	88382168	88382168	G	C	Snx14	c.2356C>G	p.Arg786Gly	missense_variant	MODERATE	196	1	0.006377	64	28	0.428	6.12694
Aplan-10-3620-Thy_vs_Aplan-10th-Exp-NHD13-Donor-plus-Pooled-Tail-Ref	chr9	89994881	89994881	C	G	Rasgrf1	c.2298C>G	p.Ser766Ser	synonymous_variant	LOW	230	0	0.005198	30	6	0.241	5.83365
Aplan-10-3620-Thy_vs_Aplan-10th-Exp-NHD13-Donor-plus-Pooled-Tail-Ref	chr9	90185796	90185796	G	C	Adamts7	c.1338G>C	p.Ser446Ser	synonymous_variant	LOW	160	0	0.007833	37	9	0.257	6.91507
Aplan-10-3620-Thy_vs_Aplan-10th-Exp-NHD13-Donor-plus-Pooled-Tail-Ref	chr9	95874731	95874731	G	C	Atr	c.2662G>C	p.Ala888Pro	missense_variant	MODERATE	187	0	0.00622	71	16	0.23	6.41958
Aplan-10-3620-Thy_vs_Aplan-10th-Exp-NHD13-Donor-plus-Pooled-Tail-Ref	chr9	95927292	95927292	C	G	Atr	c.6022C>G	p.Arg2008Gly	missense_variant	MODERATE	108	1	0.022	40	14	0.37	6.26094
Aplan-10-3620-Thy_vs_Aplan-10th-Exp-NHD13-Donor-plus-Pooled-Tail-Ref	chr9	96996168	96996168	G	C	Spsb4	c.101C>G	p.Pro34Arg	missense_variant	MODERATE	194	1	0.012	24	9	0.317	6.58694
Aplan-10-3620-Thy_vs_Aplan-10th-Exp-NHD13-Donor-plus-Pooled-Tail-Ref	chr9	100552813	100552813	C	G	Slc35g2	c.804G>C	p.Thr268Thr	synonymous_variant	LOW	344	0	0.003404	90	32	0.338	6.16867
Aplan-10-3620-Thy_vs_Aplan-10th-Exp-NHD13-Donor-plus-Pooled-Tail-Ref	chr9	105397319	105397319	C	G	Aste1	c.757C>G	p.Arg253Gly	missense_variant	MODERATE	373	1	0.004611	91	22	0.253	5.95575
Aplan-10-3620-Thy_vs_Aplan-10th-Exp-NHD13-Donor-plus-Pooled-Tail-Ref	chr9	107300653	107300653	C	G	Cish	c.527C>G	p.Pro176Arg	missense_variant	MODERATE	191	0	0.0059	38	12	0.334	6.56538
Aplan-10-3620-Thy_vs_Aplan-10th-Exp-NHD13-Donor-plus-Pooled-Tail-Ref	chr9	107513531	107513531	G	C	Cacna2d2	c.1061G>C	p.Arg354Pro	missense_variant	MODERATE	127	0	0.008469	30	6	0.233	4.50246
Aplan-10-3620-Thy_vs_Aplan-10th-Exp-NHD13-Donor-plus-Pooled-Tail-Ref	chr9	107583364	107583364	C	G	Nat6	c.457C>G	p.Arg153Gly	missense_variant	MODERATE	172	0	0.006912	35	9	0.272	7.35853
Aplan-10-3620-Thy_vs_Aplan-10th-Exp-NHD13-Donor-plus-Pooled-Tail-Ref	chr9	107600080	107600080	C	G	Sema3b	c.1519G>C	p.Ala507Pro	missense_variant	MODERATE	119	0	0.00872	42	8	0.21	4.90036
Aplan-10-3620-Thy_vs_Aplan-10th-Exp-NHD13-Donor-plus-Pooled-Tail-Ref	chr9	108115298	108115298	C	G	Bsn	c.3254G>C	p.Arg1085Pro	missense_variant	MODERATE	110	0	0.01	22	7	0.318	5.8395
Aplan-10-3620-Thy_vs_Aplan-10th-Exp-NHD13-Donor-plus-Pooled-Tail-Ref	chr9	108492917	108492917	G	C	Lamb2	c.*2497G>C		downstream_gene_variant	MODIFIER	223	0	0.005491	65	15	0.225	6.98979
Aplan-10-3620-Thy_vs_Aplan-10th-Exp-NHD13-Donor-plus-Pooled-Tail-Ref	chr9	108495064	108495064	C	G	Usp19	c.1319C>G	p.Pro440Arg	missense_variant	MODERATE	141	1	0.015	29	5	0.206	3.2506
Aplan-10-3620-Thy_vs_Aplan-10th-Exp-NHD13-Donor-plus-Pooled-Tail-Ref	chr9	108542512	108542512	C	G	Qrich1	c.1600C>G	p.Arg534Gly	missense_variant	MODERATE	203	0	0.005849	64	23	0.385	6.84364
Aplan-10-3620-Thy_vs_Aplan-10th-Exp-NHD13-Donor-plus-Pooled-Tail-Ref	chr9	108984159	108984159	G	C	Col7a1	c.8771G>C	p.Arg2924Pro	missense_variant	MODERATE	246	0	0.004529	38	8	0.222	7.28849
Aplan-10-3620-Thy_vs_Aplan-10th-Exp-NHD13-Donor-plus-Pooled-Tail-Ref	chr9	109744865	109744865	C	G	Fbxw26	c.218G>C	p.Arg73Pro	missense_variant	MODERATE	697	0	0.0017	165	74	0.443	6.26093
Aplan-10-3620-Thy_vs_Aplan-10th-Exp-NHD13-Donor-plus-Pooled-Tail-Ref	chr9	110766664	110766664	C	G	Myl3	c.228C>G	p.Gly76Gly	synonymous_variant	LOW	151	0	0.007869	37	15	0.395	6.71209
Aplan-10-3620-Thy_vs_Aplan-10th-Exp-NHD13-Donor-plus-Pooled-Tail-Ref	chr9	110888641	110888641	C	G	Als2cl	c.846-45C>G		intron_variant	MODIFIER	206	0	0.005787	51	19	0.383	6.80018
Aplan-10-3620-Thy_vs_Aplan-10th-Exp-NHD13-Donor-plus-Pooled-Tail-Ref	chr9	113899416	113899416	G	C	Clasp2	c.3175-40G>C		intron_variant	MODIFIER	130	0	0.007873	46	11	0.262	6.8358
Aplan-10-3620-Thy_vs_Aplan-10th-Exp-NHD13-Donor-plus-Pooled-Tail-Ref	chr9	114513484	114513484	C	G	Trim71	c.1729G>C	p.Gly577Arg	missense_variant	MODERATE	317	0	0.00365	65	12	0.203	6.2623
Aplan-10-3620-Thy_vs_Aplan-10th-Exp-NHD13-Donor-plus-Pooled-Tail-Ref	chr9	115954575	115954575	C	G	Gadl1	c.598C>G	p.His200Asp	missense_variant	MODERATE	320	0	0.003942	89	31	0.353	6.13489
Aplan-10-3620-Thy_vs_Aplan-10th-Exp-NHD13-Donor-plus-Pooled-Tail-Ref	chr9	116636459	116636459	G	C	Rbms3	c.1041C>G	p.Ala347Ala	synonymous_variant	LOW	186	0	0.006943	35	8	0.233	6.72223
Aplan-10-3620-Thy_vs_Aplan-10th-Exp-NHD13-Donor-plus-Pooled-Tail-Ref	chr9	119127527	119127527	C	G	Dlec1	c.2268C>G	p.Tyr756*	stop_gained	HIGH	209	0	0.005891	45	10	0.211	6.13558
Aplan-10-3620-Thy_vs_Aplan-10th-Exp-NHD13-Donor-plus-Pooled-Tail-Ref	chr9	119138214	119138214	C	G	Dlec1	c.3642+25C>G		intron_variant	MODIFIER	113	0	0.009231	27	9	0.319	6.9705
Aplan-10-3620-Thy_vs_Aplan-10th-Exp-NHD13-Donor-plus-Pooled-Tail-Ref	chr9	119754312	119754312	C	G	Scn11a	c.5236G>C	p.Val1746Leu	missense_variant	MODERATE	225	0	0.005248	58	18	0.273	7.03981
Aplan-10-3620-Thy_vs_Aplan-10th-Exp-NHD13-Donor-plus-Pooled-Tail-Ref	chr10	3958198	3958198	C	G	Plekhg1	c.3114C>G	p.Pro1038Pro	synonymous_variant	LOW	321	0	0.003921	64	13	0.214	7.13382
Aplan-10-3620-Thy_vs_Aplan-10th-Exp-NHD13-Donor-plus-Pooled-Tail-Ref	chr10	3985610	3985610	C	G	Mthfd1l	c.584C>G	p.Pro195Arg	missense_variant	MODERATE	418	0	0.003035	100	28	0.286	6.14102
Aplan-10-3620-Thy_vs_Aplan-10th-Exp-NHD13-Donor-plus-Pooled-Tail-Ref	chr10	7126696	7126696	G	C	Cnksr3	c.1218C>G	p.Pro406Pro	synonymous_variant	LOW	179	0	0.007112	51	11	0.205	7.59454
Aplan-10-3620-Thy_vs_Aplan-10th-Exp-NHD13-Donor-plus-Pooled-Tail-Ref	chr10	7862443	7862443	G	C	Zc3h12d	c.512G>C	p.Arg171Pro	missense_variant	MODERATE	156	0	0.008202	26	5	0.201	4.37902
Aplan-10-3620-Thy_vs_Aplan-10th-Exp-NHD13-Donor-plus-Pooled-Tail-Ref	chr10	21345096	21345096	G	C	Hbs1l	c.979G>C	p.Gly327Arg	missense_variant	MODERATE	243	0	0.005068	94	46	0.477	6.30341
Aplan-10-3620-Thy_vs_Aplan-10th-Exp-NHD13-Donor-plus-Pooled-Tail-Ref	chr10	24596510	24596510	G	C	Ctgf	c.450G>C	p.Pro150Pro	synonymous_variant	LOW	208	0	0.005184	35	8	0.233	7.05704
Aplan-10-3620-Thy_vs_Aplan-10th-Exp-NHD13-Donor-plus-Pooled-Tail-Ref	chr10	24661940	24661940	G	C	Enpp1	c.1146C>G	p.Val382Val	synonymous_variant	LOW	122	0	0.009797	23	5	0.238	4.17042
Aplan-10-3620-Thy_vs_Aplan-10th-Exp-NHD13-Donor-plus-Pooled-Tail-Ref	chr10	34044145	34044145	G	C	Fam26d	c.125C>G	p.Pro42Arg	missense_variant	MODERATE	198	0	0.005844	62	11	0.223	7.16432
Aplan-10-3620-Thy_vs_Aplan-10th-Exp-NHD13-Donor-plus-Pooled-Tail-Ref	chr10	34298214	34298214	G	C	Tspyl4	c.701G>C	p.Arg234Pro	missense_variant	MODERATE	198	0	0.006147	64	20	0.321	6.03708
Aplan-10-3620-Thy_vs_Aplan-10th-Exp-NHD13-Donor-plus-Pooled-Tail-Ref	chr10	40737858	40737858	G	C	Mettl24	c.548+44G>C		intron_variant	MODIFIER	95	0	0.012	28	12	0.433	6.8418
Aplan-10-3620-Thy_vs_Aplan-10th-Exp-NHD13-Donor-plus-Pooled-Tail-Ref	chr10	40851104	40851104	G	C	Cdc40	c.491-35C>G		intron_variant	MODIFIER	239	0	0.004998	96	20	0.221	6.99401
Aplan-10-3620-Thy_vs_Aplan-10th-Exp-NHD13-Donor-plus-Pooled-Tail-Ref	chr10	41455204	41455204	C	G	Zbtb24	c.1117+9C>G		intron_variant	MODIFIER	161	0	0.007708	16	6	0.356	6.68979
Aplan-10-3620-Thy_vs_Aplan-10th-Exp-NHD13-Donor-plus-Pooled-Tail-Ref	chr10	41485198	41485198	C	G	Mical1	c.2476C>G	p.Arg826Gly	missense_variant	MODERATE	114	0	0.01	25	7	0.3	5.55014
Aplan-10-3620-Thy_vs_Aplan-10th-Exp-NHD13-Donor-plus-Pooled-Tail-Ref	chr10	53652366	53652366	C	G	Fam184a	c.2398G>C	p.Val800Leu	missense_variant	MODERATE	134	1	0.00937	50	12	0.261	6.23924
Aplan-10-3620-Thy_vs_Aplan-10th-Exp-NHD13-Donor-plus-Pooled-Tail-Ref	chr10	58628630	58628630	G	C	Edar	c.186C>G	p.Tyr62*	stop_gained	HIGH	91	0	0.013	29	5	0.208	3.20542
Aplan-10-3620-Thy_vs_Aplan-10th-Exp-NHD13-Donor-plus-Pooled-Tail-Ref	chr10	59733099	59733099	C	G	Micu1	c.278C>G	p.Ala93Gly	missense_variant	MODERATE	79	0	0.014	31	6	0.208	3.46375
Aplan-10-3620-Thy_vs_Aplan-10th-Exp-NHD13-Donor-plus-Pooled-Tail-Ref	chr10	62265174	62265174	G	C	Tacr2	c.1062G>C	p.Lys354Asn	missense_variant	MODERATE	149	0	0.008396	25	6	0.227	5.2999
Aplan-10-3620-Thy_vs_Aplan-10th-Exp-NHD13-Donor-plus-Pooled-Tail-Ref	chr10	62832907	62832907	G	C	Tet1	c.4292C>G	p.Pro1431Arg	missense_variant	MODERATE	180	0	0.006748	52	11	0.217	7.5336
Aplan-10-3620-Thy_vs_Aplan-10th-Exp-NHD13-Donor-plus-Pooled-Tail-Ref	chr10	62950766	62950766	G	C	Dna2	c.292G>C	p.Val98Leu	missense_variant	MODERATE	180	0	0.006719	65	12	0.208	7.26572
Aplan-10-3620-Thy_vs_Aplan-10th-Exp-NHD13-Donor-plus-Pooled-Tail-Ref	chr10	62950778	62950778	G	C	Dna2	c.304G>C	p.Gly102Arg	missense_variant	MODERATE	190	0	0.006361	65	12	0.204	7.47894
Aplan-10-3620-Thy_vs_Aplan-10th-Exp-NHD13-Donor-plus-Pooled-Tail-Ref	chr10	63076423	63076423	G	C	Pbld1	c.829G>C	p.Gly277Arg	missense_variant	MODERATE	296	0	0.004145	61	16	0.25	6.6142
Aplan-10-3620-Thy_vs_Aplan-10th-Exp-NHD13-Donor-plus-Pooled-Tail-Ref	chr10	67987453	67987453	G	C	Rtkn2	c.186G>C	p.Thr62Thr	synonymous_variant	LOW	114	1	0.021	34	9	0.25	5.2218
Aplan-10-3620-Thy_vs_Aplan-10th-Exp-NHD13-Donor-plus-Pooled-Tail-Ref	chr10	68097692	68097692	G	C	Arid5b	c.2379C>G	p.Leu793Leu	synonymous_variant	LOW	254	1	0.009184	75	18	0.258	6.89855
Aplan-10-3620-Thy_vs_Aplan-10th-Exp-NHD13-Donor-plus-Pooled-Tail-Ref	chr10	69990965	69990965	G	C	Ank3	c.4409-3407G>C		intron_variant	MODIFIER	148	0	0.007421	34	8	0.25	6.14827
Aplan-10-3620-Thy_vs_Aplan-10th-Exp-NHD13-Donor-plus-Pooled-Tail-Ref	chr10	74991466	74991466	C	G	Gnaz	c.49C>G	p.Arg17Gly	missense_variant	MODERATE	100	0	0.011	23	7	0.304	5.46197
Aplan-10-3620-Thy_vs_Aplan-10th-Exp-NHD13-Donor-plus-Pooled-Tail-Ref	chr10	75937378	75937378	C	G	Chchd10	c.321C>G	p.Asp107Glu	missense_variant	MODERATE	157	0	0.007434	30	6	0.213	4.96491
Aplan-10-3620-Thy_vs_Aplan-10th-Exp-NHD13-Donor-plus-Pooled-Tail-Ref	chr10	75937512	75937512	C	G	Gm867	c.*1677G>C		downstream_gene_variant	MODIFIER	135	1	0.009188	46	10	0.245	5.3477
Aplan-10-3620-Thy_vs_Aplan-10th-Exp-NHD13-Donor-plus-Pooled-Tail-Ref	chr10	75949326	75949326	G	C	Vpreb3	c.236G>C	p.Arg79Pro	missense_variant	MODERATE	166	0	0.006721	30	9	0.269	5.99576
Aplan-10-3620-Thy_vs_Aplan-10th-Exp-NHD13-Donor-plus-Pooled-Tail-Ref	chr10	76563936	76563936	C	G	Spatc1l	c.291C>G	p.Ala97Ala	synonymous_variant	LOW	196	0	0.006462	47	10	0.23	7.50064
Aplan-10-3620-Thy_vs_Aplan-10th-Exp-NHD13-Donor-plus-Pooled-Tail-Ref	chr10	77260617	77260617	C	G	Pofut2	c.175C>G	p.Arg59Gly	missense_variant	MODERATE	454	0	0.002699	56	12	0.235	6.67071
Aplan-10-3620-Thy_vs_Aplan-10th-Exp-NHD13-Donor-plus-Pooled-Tail-Ref	chr10	78000699	78000699	G	C	Pfkl	c.570C>G	p.Asp190Glu	missense_variant	MODERATE	165	0	0.007496	39	14	0.375	6.08689
Aplan-10-3620-Thy_vs_Aplan-10th-Exp-NHD13-Donor-plus-Pooled-Tail-Ref	chr10	79711243	79711243	C	G	Bc1	n.118-13893G>C		intron_variant	MODIFIER	167	1	0.014	28	6	0.222	4.47366
Aplan-10-3620-Thy_vs_Aplan-10th-Exp-NHD13-Donor-plus-Pooled-Tail-Ref	chr10	79736303	79736303	G	C	Hcn2	c.*763G>C		downstream_gene_variant	MODIFIER	342	0	0.003533	82	17	0.212	6.54979
Aplan-10-3620-Thy_vs_Aplan-10th-Exp-NHD13-Donor-plus-Pooled-Tail-Ref	chr10	79736773	79736773	G	C	Polrmt	c.3366C>G	p.Cys1122Trp	missense_variant	MODERATE	48	0	0.024	24	8	0.338	4.21149
Aplan-10-3620-Thy_vs_Aplan-10th-Exp-NHD13-Donor-plus-Pooled-Tail-Ref	chr10	79756792	79756792	G	C	Fgf22	c.320G>C	p.Arg107Pro	missense_variant	MODERATE	151	0	0.007707	35	6	0.205	4.51401
Aplan-10-3620-Thy_vs_Aplan-10th-Exp-NHD13-Donor-plus-Pooled-Tail-Ref	chr10	79866456	79866456	C	G	Plppr3	c.781G>C	p.Val261Leu	missense_variant	MODERATE	152	0	0.007398	37	13	0.348	6.61221
Aplan-10-3620-Thy_vs_Aplan-10th-Exp-NHD13-Donor-plus-Pooled-Tail-Ref	chr10	80027806	80027806	C	G	Bc1	n.95-64341G>C		intron_variant	MODIFIER	74	0	0.016	30	6	0.24	3.40747
Aplan-10-3620-Thy_vs_Aplan-10th-Exp-NHD13-Donor-plus-Pooled-Tail-Ref	chr10	80029030	80029030	C	G	Hmha1	c.2793C>G	p.Phe931Leu	missense_variant	MODERATE	102	0	0.011	22	5	0.238	3.93196
Aplan-10-3620-Thy_vs_Aplan-10th-Exp-NHD13-Donor-plus-Pooled-Tail-Ref	chr10	80066555	80066555	G	C	Sbno2	c.1507C>G	p.Arg503Gly	missense_variant	MODERATE	128	0	0.009334	29	7	0.279	5.41662
Aplan-10-3620-Thy_vs_Aplan-10th-Exp-NHD13-Donor-plus-Pooled-Tail-Ref	chr10	80306311	80306311	G	C	Apc2	c.991G>C	p.Ala331Pro	missense_variant	MODERATE	98	0	0.011	14	9	0.572	7.26821
Aplan-10-3620-Thy_vs_Aplan-10th-Exp-NHD13-Donor-plus-Pooled-Tail-Ref	chr10	80358815	80358815	G	C	Plk5	c.371G>C	p.Arg124Pro	missense_variant	MODERATE	180	0	0.007307	36	10	0.303	6.45741
Aplan-10-3620-Thy_vs_Aplan-10th-Exp-NHD13-Donor-plus-Pooled-Tail-Ref	chr10	80717820	80717820	G	C	Ap3d1	c.1592C>G	p.Ala531Gly	missense_variant	MODERATE	98	0	0.013	21	9	0.414	7.51729
Aplan-10-3620-Thy_vs_Aplan-10th-Exp-NHD13-Donor-plus-Pooled-Tail-Ref	chr10	81200439	81200439	G	C	Nmrk2	c.176C>G	p.Ser59Cys	missense_variant	MODERATE	283	0	0.004294	45	21	0.405	6.98287
Aplan-10-3620-Thy_vs_Aplan-10th-Exp-NHD13-Donor-plus-Pooled-Tail-Ref	chr10	81214825	81214825	G	C	Atcay	c.255C>G	p.Leu85Leu	synonymous_variant	LOW	197	0	0.006405	72	26	0.393	6.59942
Aplan-10-3620-Thy_vs_Aplan-10th-Exp-NHD13-Donor-plus-Pooled-Tail-Ref	chr10	81214907	81214907	C	G	Atcay	c.173G>C	p.Arg58Pro	missense_variant	MODERATE	143	0	0.007849	48	10	0.217	6.33088
Aplan-10-3620-Thy_vs_Aplan-10th-Exp-NHD13-Donor-plus-Pooled-Tail-Ref	chr10	81420465	81420465	G	C	Nfic	c.364C>G	p.Arg122Gly	missense_variant	MODERATE	155	0	0.007343	43	10	0.237	7.02387
Aplan-10-3620-Thy_vs_Aplan-10th-Exp-NHD13-Donor-plus-Pooled-Tail-Ref	chr10	81812276	81812276	G	C	Gm10778	c.-5G>C		5_prime_UTR_variant	MODIFIER	227	1	0.005515	43	19	0.462	6.58549
Aplan-10-3620-Thy_vs_Aplan-10th-Exp-NHD13-Donor-plus-Pooled-Tail-Ref	chr10	83092108	83092108	G	C	Chst11	c.158G>C	p.Arg53Pro	missense_variant	MODERATE	208	0	0.00633	56	11	0.227	6.06654
Aplan-10-3620-Thy_vs_Aplan-10th-Exp-NHD13-Donor-plus-Pooled-Tail-Ref	chr10	84527868	84527868	G	C	Ckap4	c.1330C>G	p.Leu444Val	missense_variant	MODERATE	127	0	0.00829	17	7	0.421	7.05292
Aplan-10-3620-Thy_vs_Aplan-10th-Exp-NHD13-Donor-plus-Pooled-Tail-Ref	chr10	84684243	84684243	C	G	Polr3b	c.2022C>G	p.Tyr674*	stop_gained	HIGH	386	0	0.003219	82	15	0.21	6.92387
Aplan-10-3620-Thy_vs_Aplan-10th-Exp-NHD13-Donor-plus-Pooled-Tail-Ref	chr10	89642076	89642076	G	C	Scyl2	c.2060C>G	p.Ala687Gly	missense_variant	MODERATE	184	0	0.00658	82	17	0.206	6.20048
Aplan-10-3620-Thy_vs_Aplan-10th-Exp-NHD13-Donor-plus-Pooled-Tail-Ref	chr10	89878275	89878275	G	C	Anks1b	c.134+4470G>C		intron_variant	MODIFIER	202	0	0.005681	47	9	0.215	6.80813
Aplan-10-3620-Thy_vs_Aplan-10th-Exp-NHD13-Donor-plus-Pooled-Tail-Ref	chr10	90077242	90077242	G	C	Anks1b	c.1128+100G>C		intron_variant	MODIFIER	145	0	0.008626	51	11	0.256	6.81171
Aplan-10-3620-Thy_vs_Aplan-10th-Exp-NHD13-Donor-plus-Pooled-Tail-Ref	chr10	93525947	93525947	G	C	Amdhd1	c.1092C>G	p.Ala364Ala	synonymous_variant	LOW	161	1	0.007454	33	11	0.308	6.53485
Aplan-10-3620-Thy_vs_Aplan-10th-Exp-NHD13-Donor-plus-Pooled-Tail-Ref	chr10	94045387	94045387	G	C	Fgd6	c.2102G>C	p.Arg701Pro	missense_variant	MODERATE	161	0	0.007009	54	23	0.412	6.65246
Aplan-10-3620-Thy_vs_Aplan-10th-Exp-NHD13-Donor-plus-Pooled-Tail-Ref	chr10	117777175	117777175	C	G	Nup107	c.847G>C	p.Gly283Arg	missense_variant	MODERATE	301	0	0.004162	89	19	0.231	6.81734
Aplan-10-3620-Thy_vs_Aplan-10th-Exp-NHD13-Donor-plus-Pooled-Tail-Ref	chr10	121376216	121376216	C	G	Gns	c.444C>G	p.Ala148Ala	synonymous_variant	LOW	312	0	0.003967	42	14	0.283	6.86033
Aplan-10-3620-Thy_vs_Aplan-10th-Exp-NHD13-Donor-plus-Pooled-Tail-Ref	chr10	127068481	127068481	G	C	Tspan31	c.443C>G	p.Ala148Gly	missense_variant&splice_region_variant	MODERATE	263	1	0.008213	88	23	0.26	6.88617
Aplan-10-3620-Thy_vs_Aplan-10th-Exp-NHD13-Donor-plus-Pooled-Tail-Ref	chr10	127187222	127187222	C	G	Arhgef25	c.315G>C	p.Pro105Pro	synonymous_variant	LOW	154	0	0.008064	44	7	0.2	4.74422
Aplan-10-3620-Thy_vs_Aplan-10th-Exp-NHD13-Donor-plus-Pooled-Tail-Ref	chr10	127811060	127811060	G	C	Rdh16	c.320G>C	p.Trp107Ser	missense_variant	MODERATE	571	0	0.002107	128	46	0.377	6.42705
Aplan-10-3620-Thy_vs_Aplan-10th-Exp-NHD13-Donor-plus-Pooled-Tail-Ref	chr10	128044442	128044442	G	C	Naca	c.5342G>C	p.Gly1781Ala	missense_variant	MODERATE	340	0	0.003465	61	15	0.25	6.4346
Aplan-10-3620-Thy_vs_Aplan-10th-Exp-NHD13-Donor-plus-Pooled-Tail-Ref	chr10	128250683	128250683	C	G	Apon	c.-3772C>G		upstream_gene_variant	MODIFIER	206	0	0.005637	47	19	0.386	6.09899
Aplan-10-3620-Thy_vs_Aplan-10th-Exp-NHD13-Donor-plus-Pooled-Tail-Ref	chr10	128308206	128308206	C	G	Pan2	c.424C>G	p.Arg142Gly	missense_variant	MODERATE	202	2	0.006103	49	18	0.349	6.46663
Aplan-10-3620-Thy_vs_Aplan-10th-Exp-NHD13-Donor-plus-Pooled-Tail-Ref	chr10	128326174	128326174	C	G	Cnpy2	c.315C>G	p.Tyr105*	stop_gained	HIGH	150	1	0.00821	35	9	0.265	5.97205
Aplan-10-3620-Thy_vs_Aplan-10th-Exp-NHD13-Donor-plus-Pooled-Tail-Ref	chr10	128635778	128635778	G	C	Ikzf4	c.997+12C>G		intron_variant	MODIFIER	92	0	0.012	16	7	0.438	6.38692
Aplan-10-3620-Thy_vs_Aplan-10th-Exp-NHD13-Donor-plus-Pooled-Tail-Ref	chr10	128640153	128640153	G	C	Ikzf4	c.703C>G	p.Arg235Gly	missense_variant	MODERATE	190	0	0.006693	23	13	0.519	6.66603
Aplan-10-3620-Thy_vs_Aplan-10th-Exp-NHD13-Donor-plus-Pooled-Tail-Ref	chr10	128641108	128641108	G	C	Ikzf4	c.492C>G	p.Cys164Trp	missense_variant	MODERATE	112	1	0.022	26	9	0.37	6.1435
Aplan-10-3620-Thy_vs_Aplan-10th-Exp-NHD13-Donor-plus-Pooled-Tail-Ref	chr11	3888352	3888352	C	G	4921536K21Rik	c.358-43G>C		intron_variant	MODIFIER	162	0	0.0067	56	15	0.26	6.33808
Aplan-10-3620-Thy_vs_Aplan-10th-Exp-NHD13-Donor-plus-Pooled-Tail-Ref	chr11	4094011	4094011	C	G	Mtfp1	c.218G>C	p.Arg73Pro	missense_variant	MODERATE	96	0	0.013	23	6	0.285	4.53625
Aplan-10-3620-Thy_vs_Aplan-10th-Exp-NHD13-Donor-plus-Pooled-Tail-Ref	chr11	4107953	4107953	C	G	Sec14l2	c.664+544G>C		intron_variant	MODIFIER	148	0	0.007995	53	17	0.333	6.17299
Aplan-10-3620-Thy_vs_Aplan-10th-Exp-NHD13-Donor-plus-Pooled-Tail-Ref	chr11	4214776	4214776	C	G	Tbc1d10a	c.1126C>G	p.Arg376Gly	missense_variant	MODERATE	168	0	0.007688	23	6	0.291	5.79034
Aplan-10-3620-Thy_vs_Aplan-10th-Exp-NHD13-Donor-plus-Pooled-Tail-Ref	chr11	4664258	4664258	C	G	Ascc2	c.863C>G	p.Pro288Arg	missense_variant	MODERATE	144	0	0.008409	38	8	0.207	5.71796
Aplan-10-3620-Thy_vs_Aplan-10th-Exp-NHD13-Donor-plus-Pooled-Tail-Ref	chr11	4737434	4737434	C	G	Zmat5	c.486C>G	p.Ser162Ser	synonymous_variant	LOW	105	0	0.012	18	5	0.297	4.40172
Aplan-10-3620-Thy_vs_Aplan-10th-Exp-NHD13-Donor-plus-Pooled-Tail-Ref	chr11	4740506	4740506	C	G	Cabp7	c.116G>C	p.Arg39Pro	missense_variant	MODERATE	60	1	0.021	18	6	0.353	3.36286
Aplan-10-3620-Thy_vs_Aplan-10th-Exp-NHD13-Donor-plus-Pooled-Tail-Ref	chr11	4914525	4914525	C	G	Thoc5	c.970C>G	p.Arg324Gly	missense_variant	MODERATE	323	0	0.003996	53	21	0.4	6.73627
Aplan-10-3620-Thy_vs_Aplan-10th-Exp-NHD13-Donor-plus-Pooled-Tail-Ref	chr11	5868787	5868787	C	G	Aebp1	c.1663C>G	p.Arg555Gly	missense_variant	MODERATE	146	0	0.007602	39	9	0.216	6.43278
Aplan-10-3620-Thy_vs_Aplan-10th-Exp-NHD13-Donor-plus-Pooled-Tail-Ref	chr11	5868827	5868827	C	G	Pold2	c.*3431G>C		downstream_gene_variant	MODIFIER	136	0	0.008125	36	7	0.2	4.971
Aplan-10-3620-Thy_vs_Aplan-10th-Exp-NHD13-Donor-plus-Pooled-Tail-Ref	chr11	5972307	5972307	C	G	Camk2b	c.1549G>C	p.Glu517Gln	missense_variant	MODERATE	231	0	0.005659	35	19	0.531	6.95312
Aplan-10-3620-Thy_vs_Aplan-10th-Exp-NHD13-Donor-plus-Pooled-Tail-Ref	chr11	6215108	6215108	C	G	Npc1l1	c.3203G>C	p.Arg1068Pro	missense_variant	MODERATE	142	0	0.008623	35	18	0.485	6.4232
Aplan-10-3620-Thy_vs_Aplan-10th-Exp-NHD13-Donor-plus-Pooled-Tail-Ref	chr11	11839451	11839451	C	G	Ddc	c.823G>C	p.Ala275Pro	missense_variant	MODERATE	252	0	0.004966	90	21	0.24	7.01984
Aplan-10-3620-Thy_vs_Aplan-10th-Exp-NHD13-Donor-plus-Pooled-Tail-Ref	chr11	11875554	11875554	C	G	Ddc	c.315+691G>C		intron_variant	MODIFIER	132	0	0.009611	52	12	0.22	7.02368
Aplan-10-3620-Thy_vs_Aplan-10th-Exp-NHD13-Donor-plus-Pooled-Tail-Ref	chr11	22137953	22137953	G	C	Ehbp1	c.1205C>G	p.Pro402Arg	missense_variant	MODERATE	110	0	0.011	58	15	0.245	7.51002
Aplan-10-3620-Thy_vs_Aplan-10th-Exp-NHD13-Donor-plus-Pooled-Tail-Ref	chr11	29461775	29461775	G	C	Ccdc88a	c.1583G>C	p.Ser528Thr	missense_variant	MODERATE	104	0	0.012	35	8	0.219	5.07777
Aplan-10-3620-Thy_vs_Aplan-10th-Exp-NHD13-Donor-plus-Pooled-Tail-Ref	chr11	34078411	34078411	G	C	Lcp2	c.818+7G>C		splice_region_variant&intron_variant	LOW	593	0	0.002025	211	44	0.209	5.84142
Aplan-10-3620-Thy_vs_Aplan-10th-Exp-NHD13-Donor-plus-Pooled-Tail-Ref	chr11	34402048	34402048	G	C	Fam196b	c.89G>C	p.Arg30Pro	missense_variant	MODERATE	161	0	0.007149	40	9	0.236	6.65324
Aplan-10-3620-Thy_vs_Aplan-10th-Exp-NHD13-Donor-plus-Pooled-Tail-Ref	chr11	45937456	45937456	C	G	Lsm11	c.494G>C	p.Arg165Pro	missense_variant	MODERATE	184	0	0.006399	54	11	0.219	7.4583
Aplan-10-3620-Thy_vs_Aplan-10th-Exp-NHD13-Donor-plus-Pooled-Tail-Ref	chr11	45984746	45984746	C	G	Sox30	c.1324C>G	p.Arg442Gly	missense_variant	MODERATE	228	0	0.005171	71	16	0.21	6.03458
Aplan-10-3620-Thy_vs_Aplan-10th-Exp-NHD13-Donor-plus-Pooled-Tail-Ref	chr11	48807881	48807881	C	G	Rack1	c.*1836C>G		downstream_gene_variant	MODIFIER	124	0	0.00916	33	19	0.543	6.8554
Aplan-10-3620-Thy_vs_Aplan-10th-Exp-NHD13-Donor-plus-Pooled-Tail-Ref	chr11	49634227	49634227	C	G	Flt4	c.1899C>G	p.His633Gln	missense_variant	MODERATE	171	1	0.007216	43	20	0.487	5.98474
Aplan-10-3620-Thy_vs_Aplan-10th-Exp-NHD13-Donor-plus-Pooled-Tail-Ref	chr11	49863615	49863615	C	G	Mapk9	c.194C>G	p.Thr65Arg	missense_variant	MODERATE	175	0	0.006896	90	21	0.239	6.27559
Aplan-10-3620-Thy_vs_Aplan-10th-Exp-NHD13-Donor-plus-Pooled-Tail-Ref	chr11	50232920	50232920	G	C	Mir6919	n.*614G>C		downstream_gene_variant	MODIFIER	107	0	0.011	34	10	0.303	6.67291
Aplan-10-3620-Thy_vs_Aplan-10th-Exp-NHD13-Donor-plus-Pooled-Tail-Ref	chr11	50238420	50238420	C	G	Ltc4s	c.16G>C	p.Ala6Pro	missense_variant	MODERATE	196	0	0.006603	66	13	0.229	6.51865
Aplan-10-3620-Thy_vs_Aplan-10th-Exp-NHD13-Donor-plus-Pooled-Tail-Ref	chr11	51713505	51713505	C	G	Sec24a	c.2257+26G>C		intron_variant	MODIFIER	122	0	0.00931	33	8	0.267	5.69486
Aplan-10-3620-Thy_vs_Aplan-10th-Exp-NHD13-Donor-plus-Pooled-Tail-Ref	chr11	53437292	53437292	C	G	Gdf9	c.1074C>G	p.Ile358Met	missense_variant	MODERATE	274	0	0.004252	69	16	0.238	6.95307
Aplan-10-3620-Thy_vs_Aplan-10th-Exp-NHD13-Donor-plus-Pooled-Tail-Ref	chr11	53613920	53613920	C	T	Il4	c.317G>A	p.Arg106Gln	missense_variant	MODERATE	187	0	0.006515	51	10	0.204	7.01632
Aplan-10-3620-Thy_vs_Aplan-10th-Exp-NHD13-Donor-plus-Pooled-Tail-Ref	chr11	53775938	53775938	G	C	Irf1	c.741G>C	p.Trp247Cys	missense_variant	MODERATE	202	0	0.006033	51	12	0.214	7.05175
Aplan-10-3620-Thy_vs_Aplan-10th-Exp-NHD13-Donor-plus-Pooled-Tail-Ref	chr11	54327250	54327250	G	C	Acsl6	c.788G>C	p.Gly263Ala	missense_variant	MODERATE	134	0	0.009229	33	14	0.379	6.03603
Aplan-10-3620-Thy_vs_Aplan-10th-Exp-NHD13-Donor-plus-Pooled-Tail-Ref	chr11	54934029	54934029	G	C	Tnip1	c.626C>G	p.Ser209Cys	missense_variant	MODERATE	96	0	0.013	26	5	0.238	3.49848
Aplan-10-3620-Thy_vs_Aplan-10th-Exp-NHD13-Donor-plus-Pooled-Tail-Ref	chr11	54934070	54934070	G	C	Tnip1	c.585C>G	p.Thr195Thr	synonymous_variant	LOW	108	1	0.012	27	5	0.217	2.92079
Aplan-10-3620-Thy_vs_Aplan-10th-Exp-NHD13-Donor-plus-Pooled-Tail-Ref	chr11	55103706	55103706	C	G	Gm2a	c.201C>G	p.Ser67Arg	missense_variant	MODERATE	243	0	0.005017	51	12	0.222	6.25284
Aplan-10-3620-Thy_vs_Aplan-10th-Exp-NHD13-Donor-plus-Pooled-Tail-Ref	chr11	55281317	55281317	C	G	Fat2	c.8569G>C	p.Gly2857Arg	missense_variant	MODERATE	250	0	0.004705	63	17	0.305	6.43474
Aplan-10-3620-Thy_vs_Aplan-10th-Exp-NHD13-Donor-plus-Pooled-Tail-Ref	chr11	57808057	57808057	C	G	Sap30l	c.355C>G	p.Arg119Gly	missense_variant	MODERATE	127	0	0.009487	31	5	0.203	3.65613
Aplan-10-3620-Thy_vs_Aplan-10th-Exp-NHD13-Donor-plus-Pooled-Tail-Ref	chr11	58509126	58509126	G	C	Olfr331-Olfr330	n.58509126G>C		intergenic_region	MODIFIER	262	1	0.004786	72	15	0.2	6.55714
Aplan-10-3620-Thy_vs_Aplan-10th-Exp-NHD13-Donor-plus-Pooled-Tail-Ref	chr11	58817803	58817803	C	G	Olfr313	c.794C>G	p.Ser265Cys	missense_variant	MODERATE	818	0	0.001524	214	92	0.424	5.92662
Aplan-10-3620-Thy_vs_Aplan-10th-Exp-NHD13-Donor-plus-Pooled-Tail-Ref	chr11	58841456	58841456	C	G	Olfr311	c.341C>G	p.Thr114Arg	missense_variant	MODERATE	787	0	0.001468	189	41	0.226	6.26649
Aplan-10-3620-Thy_vs_Aplan-10th-Exp-NHD13-Donor-plus-Pooled-Tail-Ref	chr11	59051320	59051320	C	T	Obscn	c.13228G>A	p.Glu4410Lys	missense_variant	MODERATE	197	0	0.006122	31	7	0.241	6.34284
Aplan-10-3620-Thy_vs_Aplan-10th-Exp-NHD13-Donor-plus-Pooled-Tail-Ref	chr11	59069936	59069936	C	G	Obscn	c.9548G>C	p.Arg3183Pro	missense_variant	MODERATE	102	0	0.011	25	12	0.45	6.0945
Aplan-10-3620-Thy_vs_Aplan-10th-Exp-NHD13-Donor-plus-Pooled-Tail-Ref	chr11	59082421	59082421	G	C	Obscn	c.5925C>G	p.Val1975Val	synonymous_variant	LOW	139	0	0.008503	22	6	0.249	5.46988
Aplan-10-3620-Thy_vs_Aplan-10th-Exp-NHD13-Donor-plus-Pooled-Tail-Ref	chr11	59129548	59129548	C	G	Obscn	c.2572+893G>C		intron_variant	MODIFIER	260	1	0.008735	56	16	0.309	5.99841
Aplan-10-3620-Thy_vs_Aplan-10th-Exp-NHD13-Donor-plus-Pooled-Tail-Ref	chr11	59132629	59132629	C	G	Obscn	c.1921G>C	p.Glu641Gln	missense_variant	MODERATE	134	0	0.008981	41	19	0.444	5.99135
Aplan-10-3620-Thy_vs_Aplan-10th-Exp-NHD13-Donor-plus-Pooled-Tail-Ref	chr11	59758646	59758646	G	C	Mprip	c.2160+3537G>C		intron_variant	MODIFIER	108	0	0.01	39	9	0.237	5.51146
Aplan-10-3620-Thy_vs_Aplan-10th-Exp-NHD13-Donor-plus-Pooled-Tail-Ref	chr11	59775467	59775467	C	G	Mprip	c.3043-49C>G		intron_variant	MODIFIER	192	0	0.006269	24	11	0.381	6.0217
Aplan-10-3620-Thy_vs_Aplan-10th-Exp-NHD13-Donor-plus-Pooled-Tail-Ref	chr11	60188402	60188402	C	G	Rai1	c.3291C>G	p.Ala1097Ala	synonymous_variant	LOW	125	0	0.009345	38	12	0.333	6.50074
Aplan-10-3620-Thy_vs_Aplan-10th-Exp-NHD13-Donor-plus-Pooled-Tail-Ref	chr11	60745871	60745871	C	G	Top3a	c.1967G>C	p.Arg656Pro	missense_variant	MODERATE	197	0	0.006056	77	16	0.234	6.26096
Aplan-10-3620-Thy_vs_Aplan-10th-Exp-NHD13-Donor-plus-Pooled-Tail-Ref	chr11	61336964	61336964	C	G	Slc47a2	c.334-1G>C		splice_acceptor_variant&intron_variant	HIGH	126	0	0.009362	34	11	0.3	6.26598
Aplan-10-3620-Thy_vs_Aplan-10th-Exp-NHD13-Donor-plus-Pooled-Tail-Ref	chr11	61673661	61673661	C	G	Slc5a10	c.1491G>C	p.Pro497Pro	synonymous_variant	LOW	98	0	0.012	19	5	0.294	4.15864
Aplan-10-3620-Thy_vs_Aplan-10th-Exp-NHD13-Donor-plus-Pooled-Tail-Ref	chr11	62992665	62992665	C	G	Cdrt4	c.192C>G	p.Thr64Thr	synonymous_variant	LOW	157	0	0.006931	61	18	0.339	6.29863
Aplan-10-3620-Thy_vs_Aplan-10th-Exp-NHD13-Donor-plus-Pooled-Tail-Ref	chr11	63889146	63889146	C	G	Hs3st3b1	c.1154G>C	p.Arg385Pro	missense_variant	MODERATE	93	0	0.013	31	5	0.208	3.12225
Aplan-10-3620-Thy_vs_Aplan-10th-Exp-NHD13-Donor-plus-Pooled-Tail-Ref	chr11	66094000	66094000	C	G	Dnah9	c.3737+5G>C		splice_region_variant&intron_variant	LOW	95	0	0.012	45	10	0.263	5.25484
Aplan-10-3620-Thy_vs_Aplan-10th-Exp-NHD13-Donor-plus-Pooled-Tail-Ref	chr11	67250784	67250784	G	C	Myh4	c.2468G>C	p.Arg823Pro	missense_variant	MODERATE	323	0	0.003815	129	27	0.209	6.27149
Aplan-10-3620-Thy_vs_Aplan-10th-Exp-NHD13-Donor-plus-Pooled-Tail-Ref	chr11	69328477	69328477	C	G	Cntrob	c.-5515G>C		upstream_gene_variant	MODIFIER	286	0	0.004268	102	21	0.205	6.97029
Aplan-10-3620-Thy_vs_Aplan-10th-Exp-NHD13-Donor-plus-Pooled-Tail-Ref	chr11	69331296	69331296	C	G	Kcnab3	c.867C>G	p.Cys289Trp	missense_variant	MODERATE	338	1	0.003658	86	17	0.222	6.91755
Aplan-10-3620-Thy_vs_Aplan-10th-Exp-NHD13-Donor-plus-Pooled-Tail-Ref	chr11	69357806	69357806	G	C	Chd3	c.2398C>G	p.Arg800Gly	missense_variant	MODERATE	108	1	0.012	35	8	0.233	4.30964
Aplan-10-3620-Thy_vs_Aplan-10th-Exp-NHD13-Donor-plus-Pooled-Tail-Ref	chr11	69557425	69557425	G	C	Efnb3	c.190C>G	p.Arg64Gly	missense_variant	MODERATE	84	0	0.014	33	8	0.281	4.69122
Aplan-10-3620-Thy_vs_Aplan-10th-Exp-NHD13-Donor-plus-Pooled-Tail-Ref	chr11	69589210	69589210	C	G	Trp53	c.733C>G	p.Arg245Gly	missense_variant	MODERATE	154	0	0.008215	43	14	0.371	6.70628
Aplan-10-3620-Thy_vs_Aplan-10th-Exp-NHD13-Donor-plus-Pooled-Tail-Ref	chr11	69668718	69668718	C	G	Eif4a1	c.550G>C	p.Ala184Pro	missense_variant	MODERATE	656	0	0.001934	207	85	0.398	5.83229
Aplan-10-3620-Thy_vs_Aplan-10th-Exp-NHD13-Donor-plus-Pooled-Tail-Ref	chr11	69900370	69900370	C	G	2810408A11Rik	c.382G>C	p.Glu128Gln	missense_variant	MODERATE	121	0	0.009509	23	9	0.368	7.8424
Aplan-10-3620-Thy_vs_Aplan-10th-Exp-NHD13-Donor-plus-Pooled-Tail-Ref	chr11	69936946	69936946	C	G	Ybx2	c.324C>G	p.Tyr108*	stop_gained	HIGH	376	0	0.003325	58	22	0.386	6.62985
Aplan-10-3620-Thy_vs_Aplan-10th-Exp-NHD13-Donor-plus-Pooled-Tail-Ref	chr11	69940720	69940720	C	G	Ybx2	c.982C>G	p.Arg328Gly	missense_variant	MODERATE	215	0	0.005695	25	8	0.36	6.36613
Aplan-10-3620-Thy_vs_Aplan-10th-Exp-NHD13-Donor-plus-Pooled-Tail-Ref	chr11	70405649	70405649	C	G	Pelp1	c.398G>C	p.Arg133Pro	missense_variant	MODERATE	78	0	0.017	35	11	0.333	6.14408
Aplan-10-3620-Thy_vs_Aplan-10th-Exp-NHD13-Donor-plus-Pooled-Tail-Ref	chr11	70676434	70676434	G	C	Camta2	c.2003C>G	p.Ala668Gly	missense_variant	MODERATE	190	0	0.006894	33	6	0.218	5.15867
Aplan-10-3620-Thy_vs_Aplan-10th-Exp-NHD13-Donor-plus-Pooled-Tail-Ref	chr11	71768696	71768696	C	G	Wscd1	c.601C>G	p.Arg201Gly	missense_variant	MODERATE	76	1	0.016	34	10	0.3	4.61896
Aplan-10-3620-Thy_vs_Aplan-10th-Exp-NHD13-Donor-plus-Pooled-Tail-Ref	chr11	72191552	72191552	C	G	4933427D14Rik	c.947G>C	p.Arg316Pro	missense_variant	MODERATE	156	0	0.007954	24	5	0.273	4.54442
Aplan-10-3620-Thy_vs_Aplan-10th-Exp-NHD13-Donor-plus-Pooled-Tail-Ref	chr11	72446266	72446266	G	C	Mybbp1a	c.1818+9G>C		intron_variant	MODIFIER	105	0	0.009959	24	6	0.293	4.62594
Aplan-10-3620-Thy_vs_Aplan-10th-Exp-NHD13-Donor-plus-Pooled-Tail-Ref	chr11	73120331	73120331	C	G	Itgae	c.1926C>G	p.Ser642Ser	synonymous_variant	LOW	180	0	0.007138	36	12	0.4	6.57429
Aplan-10-3620-Thy_vs_Aplan-10th-Exp-NHD13-Donor-plus-Pooled-Tail-Ref	chr11	73186258	73186258	C	G	Tax1bp3	c.*5033C>G		downstream_gene_variant	MODIFIER	50	0	0.022	31	8	0.279	3.61037
Aplan-10-3620-Thy_vs_Aplan-10th-Exp-NHD13-Donor-plus-Pooled-Tail-Ref	chr11	73331182	73331182	C	G	Spata22	c.31C>G	p.Arg11Gly	missense_variant	MODERATE	317	0	0.004104	115	27	0.221	5.95582
Aplan-10-3620-Thy_vs_Aplan-10th-Exp-NHD13-Donor-plus-Pooled-Tail-Ref	chr11	74865073	74865073	G	C	Mir6926	n.*3054C>G		downstream_gene_variant	MODIFIER	108	0	0.012	19	5	0.252	4.33972
Aplan-10-3620-Thy_vs_Aplan-10th-Exp-NHD13-Donor-plus-Pooled-Tail-Ref	chr11	75497140	75497140	C	G	Prpf8	c.3774+61C>G		intron_variant	MODIFIER	115	0	0.009987	21	8	0.384	7.06314
Aplan-10-3620-Thy_vs_Aplan-10th-Exp-NHD13-Donor-plus-Pooled-Tail-Ref	chr11	75879039	75879039	C	G	Rph3al	c.352-4G>C		splice_region_variant&intron_variant	LOW	150	0	0.008441	19	9	0.5	7.33908
Aplan-10-3620-Thy_vs_Aplan-10th-Exp-NHD13-Donor-plus-Pooled-Tail-Ref	chr11	76240916	76240916	G	C	Glod4	c.97C>G	p.Arg33Gly	missense_variant	MODERATE	220	0	0.005955	59	15	0.261	6.08731
Aplan-10-3620-Thy_vs_Aplan-10th-Exp-NHD13-Donor-plus-Pooled-Tail-Ref	chr11	76452353	76452353	G	C	Abr	c.1673C>G	p.Thr558Arg	missense_variant	MODERATE	226	0	0.005501	56	15	0.267	6.42759
Aplan-10-3620-Thy_vs_Aplan-10th-Exp-NHD13-Donor-plus-Pooled-Tail-Ref	chr11	76802205	76802205	C	G	Cpd	c.2227+27G>C		intron_variant	MODIFIER	283	1	0.004437	116	23	0.212	6.6589
Aplan-10-3620-Thy_vs_Aplan-10th-Exp-NHD13-Donor-plus-Pooled-Tail-Ref	chr11	77137280	77137280	C	G	Efcab5	c.1632G>C	p.Glu544Asp	missense_variant	MODERATE	401	0	0.002791	116	41	0.343	5.99923
Aplan-10-3620-Thy_vs_Aplan-10th-Exp-NHD13-Donor-plus-Pooled-Tail-Ref	chr11	78171093	78171093	C	G	Nek8	c.824G>C	p.Arg275Pro	missense_variant	MODERATE	104	0	0.00961	35	7	0.229	4.40435
Aplan-10-3620-Thy_vs_Aplan-10th-Exp-NHD13-Donor-plus-Pooled-Tail-Ref	chr11	78189645	78189645	C	G	Rab34	c.129C>G	p.His43Gln	missense_variant	MODERATE	154	0	0.007875	22	7	0.35	6.73185
Aplan-10-3620-Thy_vs_Aplan-10th-Exp-NHD13-Donor-plus-Pooled-Tail-Ref	chr11	78219280	78219280	G	C	Supt6	c.3378C>G	p.Ile1126Met	missense_variant	MODERATE	130	0	0.009397	41	18	0.432	6.3578
Aplan-10-3620-Thy_vs_Aplan-10th-Exp-NHD13-Donor-plus-Pooled-Tail-Ref	chr11	79408794	79408794	G	C	Nf1	c.730+17G>C		intron_variant	MODIFIER	201	0	0.005957	108	20	0.2	6.67265
Aplan-10-3620-Thy_vs_Aplan-10th-Exp-NHD13-Donor-plus-Pooled-Tail-Ref	chr11	83519246	83519246	C	G	Heatr9	c.168G>C	p.Val56Val	synonymous_variant	LOW	156	0	0.008089	34	17	0.452	6.24563
Aplan-10-3620-Thy_vs_Aplan-10th-Exp-NHD13-Donor-plus-Pooled-Tail-Ref	chr11	83621755	83621755	C	G	E230016K23Rik	n.1015C>G		non_coding_transcript_exon_variant	MODIFIER	115	0	0.011	33	19	0.571	6.50148
Aplan-10-3620-Thy_vs_Aplan-10th-Exp-NHD13-Donor-plus-Pooled-Tail-Ref	chr11	83779414	83779414	C	G	Heatr6	c.2792C>G	p.Ala931Gly	missense_variant	MODERATE	101	0	0.011	44	7	0.2	3.77985
Aplan-10-3620-Thy_vs_Aplan-10th-Exp-NHD13-Donor-plus-Pooled-Tail-Ref	chr11	84885324	84885324	C	G	Myo19	c.135C>G	p.Pro45Pro	synonymous_variant	LOW	150	0	0.00741	55	15	0.298	6.10451
Aplan-10-3620-Thy_vs_Aplan-10th-Exp-NHD13-Donor-plus-Pooled-Tail-Ref	chr11	85801889	85801889	C	G	Bcas3	c.2575C>G	p.Arg859Gly	missense_variant	MODERATE	151	0	0.00814	26	6	0.217	5.23115
Aplan-10-3620-Thy_vs_Aplan-10th-Exp-NHD13-Donor-plus-Pooled-Tail-Ref	chr11	86555093	86555093	C	G	Tubd1	c.558C>G	p.Asn186Lys	missense_variant	MODERATE	271	0	0.004518	96	18	0.215	6.51638
Aplan-10-3620-Thy_vs_Aplan-10th-Exp-NHD13-Donor-plus-Pooled-Tail-Ref	chr11	87059560	87059560	G	C	Gdpd1	c.186C>G	p.His62Gln	missense_variant&splice_region_variant	MODERATE	233	0	0.004956	62	17	0.268	6.20764
Aplan-10-3620-Thy_vs_Aplan-10th-Exp-NHD13-Donor-plus-Pooled-Tail-Ref	chr11	87423031	87423031	G	C	Tex14	c.-4650G>C		upstream_gene_variant	MODIFIER	199	0	0.006564	54	13	0.238	6.01894
Aplan-10-3620-Thy_vs_Aplan-10th-Exp-NHD13-Donor-plus-Pooled-Tail-Ref	chr11	87443390	87443390	C	G	Mir8115	n.84-40337C>G		intron_variant	MODIFIER	107	0	0.011	27	14	0.5	6.10417
Aplan-10-3620-Thy_vs_Aplan-10th-Exp-NHD13-Donor-plus-Pooled-Tail-Ref	chr11	87443408	87443408	C	G	Mir8115	n.84-40319C>G		intron_variant	MODIFIER	133	0	0.009608	35	18	0.5	6.1362
Aplan-10-3620-Thy_vs_Aplan-10th-Exp-NHD13-Donor-plus-Pooled-Tail-Ref	chr11	88076248	88076248	G	C	Vezf1	c.850G>C	p.Glu284Gln	missense_variant	MODERATE	184	0	0.006988	65	12	0.2	7.35206
Aplan-10-3620-Thy_vs_Aplan-10th-Exp-NHD13-Donor-plus-Pooled-Tail-Ref	chr11	88944453	88944453	G	C	Scpep1	c.393C>G	p.Tyr131*	stop_gained	HIGH	154	0	0.008322	32	7	0.25	5.60745
Aplan-10-3620-Thy_vs_Aplan-10th-Exp-NHD13-Donor-plus-Pooled-Tail-Ref	chr11	88972726	88972726	C	G	Coil	c.-1223C>G		upstream_gene_variant	MODIFIER	199	0	0.006025	53	13	0.25	6.09532
Aplan-10-3620-Thy_vs_Aplan-10th-Exp-NHD13-Donor-plus-Pooled-Tail-Ref	chr11	89055460	89055460	G	C	Dgke	c.513C>G	p.Ser171Arg	missense_variant	MODERATE	324	0	0.003887	75	22	0.288	6.67686
Aplan-10-3620-Thy_vs_Aplan-10th-Exp-NHD13-Donor-plus-Pooled-Tail-Ref	chr11	94442847	94442847	G	C	Cacna1g	c.2793C>G	p.Asn931Lys	missense_variant	MODERATE	105	0	0.01	30	5	0.222	3.38612
Aplan-10-3620-Thy_vs_Aplan-10th-Exp-NHD13-Donor-plus-Pooled-Tail-Ref	chr11	94483389	94483389	C	G	Spata20	c.1054G>C	p.Ala352Pro	missense_variant	MODERATE	260	1	0.004945	56	18	0.361	6.25354
Aplan-10-3620-Thy_vs_Aplan-10th-Exp-NHD13-Donor-plus-Pooled-Tail-Ref	chr11	94542860	94542860	C	T	Rsad1	c.1211+21G>A		intron_variant	MODIFIER	238	0	0.005667	33	8	0.259	7.67042
Aplan-10-3620-Thy_vs_Aplan-10th-Exp-NHD13-Donor-plus-Pooled-Tail-Ref	chr11	95763586	95763586	C	G	Zfp652	c.1354C>G	p.Arg452Gly	missense_variant	MODERATE	86	0	0.013	23	6	0.262	4.30234
Aplan-10-3620-Thy_vs_Aplan-10th-Exp-NHD13-Donor-plus-Pooled-Tail-Ref	chr11	97676090	97676090	C	G	Mir6927	n.-970C>G		upstream_gene_variant	MODIFIER	240	0	0.005071	51	11	0.25	6.92522
Aplan-10-3620-Thy_vs_Aplan-10th-Exp-NHD13-Donor-plus-Pooled-Tail-Ref	chr11	97692805	97692805	C	G	Pcgf2	c.130G>C	p.Val44Leu	missense_variant	MODERATE	175	1	0.014	54	18	0.334	6.87932
Aplan-10-3620-Thy_vs_Aplan-10th-Exp-NHD13-Donor-plus-Pooled-Tail-Ref	chr11	97768326	97768326	C	G	Cwc25	c.-1884G>C		upstream_gene_variant	MODIFIER	390	0	0.003002	125	35	0.284	6.28473
Aplan-10-3620-Thy_vs_Aplan-10th-Exp-NHD13-Donor-plus-Pooled-Tail-Ref	chr11	98041349	98041349	C	G	Stac2	c.727G>C	p.Gly243Arg	missense_variant	MODERATE	359	0	0.003315	55	10	0.2	7.1987
Aplan-10-3620-Thy_vs_Aplan-10th-Exp-NHD13-Donor-plus-Pooled-Tail-Ref	chr11	98250255	98250255	C	G	Cdk12	c.4321C>G	p.Pro1441Ala	missense_variant	MODERATE	125	0	0.009258	35	15	0.437	6.20898
Aplan-10-3620-Thy_vs_Aplan-10th-Exp-NHD13-Donor-plus-Pooled-Tail-Ref	chr11	98687743	98687743	C	G	Psmd3	c.603C>G	p.Leu201Leu	synonymous_variant	LOW	131	0	0.009079	41	10	0.257	6.6301
Aplan-10-3620-Thy_vs_Aplan-10th-Exp-NHD13-Donor-plus-Pooled-Tail-Ref	chr11	98709638	98709638	G	C	Med24	c.1923C>G	p.Ile641Met	missense_variant	MODERATE	94	0	0.012	36	10	0.266	6.02038
Aplan-10-3620-Thy_vs_Aplan-10th-Exp-NHD13-Donor-plus-Pooled-Tail-Ref	chr11	99864541	99864541	C	G	Gm11559	c.15C>G	p.Cys5Trp	missense_variant	MODERATE	197	0	0.006285	72	17	0.254	7.16631
Aplan-10-3620-Thy_vs_Aplan-10th-Exp-NHD13-Donor-plus-Pooled-Tail-Ref	chr11	100086719	100086719	C	G	Krt32	c.520G>C	p.Val174Leu	missense_variant	MODERATE	388	1	0.006232	107	24	0.214	6.42042
Aplan-10-3620-Thy_vs_Aplan-10th-Exp-NHD13-Donor-plus-Pooled-Tail-Ref	chr11	100383511	100383511	C	G	Jup	c.352G>C	p.Glu118Gln	missense_variant	MODERATE	234	0	0.005067	40	10	0.282	6.93379
Aplan-10-3620-Thy_vs_Aplan-10th-Exp-NHD13-Donor-plus-Pooled-Tail-Ref	chr11	101762258	101762258	C	G	Dhx8	c.2921C>G	p.Pro974Arg	missense_variant	MODERATE	189	0	0.006489	50	21	0.428	6.69449
Aplan-10-3620-Thy_vs_Aplan-10th-Exp-NHD13-Donor-plus-Pooled-Tail-Ref	chr11	102053576	102053576	C	G	Cd300lg	c.1114C>G	p.Gln372Glu	missense_variant	MODERATE	181	0	0.006604	47	16	0.368	7.01878
Aplan-10-3620-Thy_vs_Aplan-10th-Exp-NHD13-Donor-plus-Pooled-Tail-Ref	chr11	102399794	102399794	G	C	Slc25a39	c.*3626C>G		downstream_gene_variant	MODIFIER	123	0	0.01	11	5	0.4	5.85892
Aplan-10-3620-Thy_vs_Aplan-10th-Exp-NHD13-Donor-plus-Pooled-Tail-Ref	chr11	102466259	102466259	C	G	Itga2b	c.794G>C	p.Arg265Pro	missense_variant&splice_region_variant	MODERATE	186	0	0.006587	22	7	0.318	7.24787
Aplan-10-3620-Thy_vs_Aplan-10th-Exp-NHD13-Donor-plus-Pooled-Tail-Ref	chr11	102800361	102800361	G	C	Gjc1	c.815C>G	p.Pro272Arg	missense_variant	MODERATE	269	1	0.00427	86	21	0.246	6.04202
Aplan-10-3620-Thy_vs_Aplan-10th-Exp-NHD13-Donor-plus-Pooled-Tail-Ref	chr11	102894510	102894510	G	C	Gfap	c.639C>G	p.Ala213Ala	synonymous_variant	LOW	103	0	0.011	21	5	0.285	4.04393
Aplan-10-3620-Thy_vs_Aplan-10th-Exp-NHD13-Donor-plus-Pooled-Tail-Ref	chr11	103201282	103201282	G	C	1700023F06Rik	c.260C>G	p.Pro87Arg	missense_variant	MODERATE	309	2	0.007694	72	20	0.276	6.66426
Aplan-10-3620-Thy_vs_Aplan-10th-Exp-NHD13-Donor-plus-Pooled-Tail-Ref	chr11	103239434	103239434	G	C	Map3k14	c.656C>G	p.Pro219Arg	missense_variant	MODERATE	242	2	0.009027	44	10	0.233	6.82387
Aplan-10-3620-Thy_vs_Aplan-10th-Exp-NHD13-Donor-plus-Pooled-Tail-Ref	chr11	104642278	104642278	C	G	Itgb3	c.1217C>G	p.Pro406Arg	missense_variant	MODERATE	144	0	0.00834	53	10	0.2	5.99405
Aplan-10-3620-Thy_vs_Aplan-10th-Exp-NHD13-Donor-plus-Pooled-Tail-Ref	chr11	105673441	105673441	C	G	Tanc2	c.89C>G	p.Pro30Arg	missense_variant	MODERATE	84	0	0.014	28	6	0.249	3.80279
Aplan-10-3620-Thy_vs_Aplan-10th-Exp-NHD13-Donor-plus-Pooled-Tail-Ref	chr11	107173263	107173263	G	C	Nol11	c.1722C>G	p.Pro574Pro	synonymous_variant	LOW	213	1	0.005744	54	11	0.209	7.01223
Aplan-10-3620-Thy_vs_Aplan-10th-Exp-NHD13-Donor-plus-Pooled-Tail-Ref	chr11	107735014	107735014	C	G	Cacng4	c.750G>C	p.Thr250Thr	synonymous_variant	LOW	194	0	0.005934	48	17	0.357	6.65816
Aplan-10-3620-Thy_vs_Aplan-10th-Exp-NHD13-Donor-plus-Pooled-Tail-Ref	chr11	108437325	108437325	C	G	Cep112	c.226C>G	p.Arg76Gly	missense_variant	MODERATE	200	0	0.00621	66	19	0.278	6.43378
Aplan-10-3620-Thy_vs_Aplan-10th-Exp-NHD13-Donor-plus-Pooled-Tail-Ref	chr11	111025234	111025234	G	C	Kcnj16	c.721G>C	p.Val241Leu	missense_variant	MODERATE	193	0	0.005766	84	16	0.215	7.10157
Aplan-10-3620-Thy_vs_Aplan-10th-Exp-NHD13-Donor-plus-Pooled-Tail-Ref	chr11	113795003	113795003	C	G	Sdk2	c.5690G>C	p.Gly1897Ala	missense_variant	MODERATE	91	0	0.014	27	8	0.347	5.51786
Aplan-10-3620-Thy_vs_Aplan-10th-Exp-NHD13-Donor-plus-Pooled-Tail-Ref	chr11	113834893	113834893	C	G	Sdk2	c.3529G>C	p.Val1177Leu	missense_variant	MODERATE	147	0	0.007905	18	6	0.412	6.13897
Aplan-10-3620-Thy_vs_Aplan-10th-Exp-NHD13-Donor-plus-Pooled-Tail-Ref	chr11	114783054	114783054	C	G	Kif19a	c.1000C>G	p.Arg334Gly	missense_variant	MODERATE	171	0	0.007307	40	14	0.363	6.11229
Aplan-10-3620-Thy_vs_Aplan-10th-Exp-NHD13-Donor-plus-Pooled-Tail-Ref	chr11	115012607	115012607	G	A	Cd300c2-Cd300ld4	n.115012607G>A		intergenic_region	MODIFIER	619	0	0.00206	135	38	0.264	6.22053
Aplan-10-3620-Thy_vs_Aplan-10th-Exp-NHD13-Donor-plus-Pooled-Tail-Ref	chr11	115146562	115146562	C	G	Rab37	n.115146562C>G		intragenic_variant	MODIFIER	222	0	0.005763	34	16	0.467	6.89474
Aplan-10-3620-Thy_vs_Aplan-10th-Exp-NHD13-Donor-plus-Pooled-Tail-Ref	chr11	115348915	115348915	C	G	Hid1	c.2188G>C	p.Gly730Arg	missense_variant	MODERATE	174	0	0.006707	27	7	0.261	6.42564
Aplan-10-3620-Thy_vs_Aplan-10th-Exp-NHD13-Donor-plus-Pooled-Tail-Ref	chr11	115863011	115863011	C	G	Llgl2-Recql5	n.115863011C>G		intergenic_region	MODIFIER	198	0	0.005756	53	12	0.217	6.8134
Aplan-10-3620-Thy_vs_Aplan-10th-Exp-NHD13-Donor-plus-Pooled-Tail-Ref	chr11	115886321	115886321	G	C	Llgl2-Recql5	n.115886321G>C		intergenic_region	MODIFIER	360	0	0.003443	50	11	0.237	6.86155
Aplan-10-3620-Thy_vs_Aplan-10th-Exp-NHD13-Donor-plus-Pooled-Tail-Ref	chr11	115893071	115893071	C	G	Recql5	c.2936G>C	p.Gly979Ala	missense_variant	MODERATE	78	0	0.016	25	6	0.273	3.90707
Aplan-10-3620-Thy_vs_Aplan-10th-Exp-NHD13-Donor-plus-Pooled-Tail-Ref	chr11	116054486	116054486	C	G	Unk	c.1371+24C>G		intron_variant	MODIFIER	354	1	0.003635	78	16	0.217	6.93864
Aplan-10-3620-Thy_vs_Aplan-10th-Exp-NHD13-Donor-plus-Pooled-Tail-Ref	chr11	116766039	116766039	C	G	St6galnac1	c.1389+34G>C		intron_variant	MODIFIER	256	0	0.004659	53	13	0.26	7.0563
Aplan-10-3620-Thy_vs_Aplan-10th-Exp-NHD13-Donor-plus-Pooled-Tail-Ref	chr11	119080943	119080943	G	C	Cbx4	c.1605C>G	p.Asp535Glu	missense_variant	MODERATE	64	0	0.019	22	5	0.3	3.12139
Aplan-10-3620-Thy_vs_Aplan-10th-Exp-NHD13-Donor-plus-Pooled-Tail-Ref	chr11	119374898	119374898	C	G	Slc26a11	c.1236C>G	p.Arg412Arg	synonymous_variant	LOW	272	0	0.004324	35	13	0.372	6.21247
Aplan-10-3620-Thy_vs_Aplan-10th-Exp-NHD13-Donor-plus-Pooled-Tail-Ref	chr11	120285226	120285226	C	G	Bahcc1	c.5795C>G	p.Ala1932Gly	missense_variant	MODERATE	221	0	0.005036	47	19	0.377	6.40844
Aplan-10-3620-Thy_vs_Aplan-10th-Exp-NHD13-Donor-plus-Pooled-Tail-Ref	chr11	120460079	120460079	G	C	Ccdc137	c.306G>C	p.Ala102Ala	synonymous_variant	LOW	101	0	0.012	21	5	0.263	4.00803
Aplan-10-3620-Thy_vs_Aplan-10th-Exp-NHD13-Donor-plus-Pooled-Tail-Ref	chr11	120726399	120726399	C	G	Rac3	c.*2790C>G		downstream_gene_variant	MODIFIER	160	0	0.007025	49	12	0.277	6.34463
Aplan-10-3620-Thy_vs_Aplan-10th-Exp-NHD13-Donor-plus-Pooled-Tail-Ref	chr11	120813673	120813673	G	C	Fasn	c.4085C>G	p.Ala1362Gly	missense_variant	MODERATE	151	0	0.007764	30	8	0.268	6.6204
Aplan-10-3620-Thy_vs_Aplan-10th-Exp-NHD13-Donor-plus-Pooled-Tail-Ref	chr11	120902027	120902027	C	G	Ccdc57	c.900G>C	p.Ala300Ala	synonymous_variant	LOW	83	0	0.014	24	5	0.217	3.39814
Aplan-10-3620-Thy_vs_Aplan-10th-Exp-NHD13-Donor-plus-Pooled-Tail-Ref	chr11	121106492	121106492	C	G	Sectm1a-Tex19.2	n.121106492C>G		intergenic_region	MODIFIER	237	2	0.005178	72	16	0.222	6.18149
Aplan-10-3620-Thy_vs_Aplan-10th-Exp-NHD13-Donor-plus-Pooled-Tail-Ref	chr11	121237281	121237281	C	G	Narf	c.-44C>G		5_prime_UTR_premature_start_codon_gain_variant	LOW	122	0	0.009145	15	8	0.459	6.49936
Aplan-10-3620-Thy_vs_Aplan-10th-Exp-NHD13-Donor-plus-Pooled-Tail-Ref	chr12	30002736	30002736	G	C	Pxdn	c.2911G>C	p.Gly971Arg	missense_variant	MODERATE	128	0	0.008705	27	7	0.295	5.62178
Aplan-10-3620-Thy_vs_Aplan-10th-Exp-NHD13-Donor-plus-Pooled-Tail-Ref	chr12	33036557	33036557	G	C	Cdhr3	c.2337C>G	p.Ala779Ala	synonymous_variant	LOW	198	0	0.006279	82	18	0.233	7.07236
Aplan-10-3620-Thy_vs_Aplan-10th-Exp-NHD13-Donor-plus-Pooled-Tail-Ref	chr12	33401201	33401201	G	C	Efcab10	c.371G>C	p.Arg124Thr	missense_variant	MODERATE	372	0	0.003343	162	37	0.24	5.9544
Aplan-10-3620-Thy_vs_Aplan-10th-Exp-NHD13-Donor-plus-Pooled-Tail-Ref	chr12	51999680	51999680	C	G	Dtd2	c.375G>C	p.Leu125Leu	synonymous_variant	LOW	405	0	0.003058	86	22	0.267	6.02169
Aplan-10-3620-Thy_vs_Aplan-10th-Exp-NHD13-Donor-plus-Pooled-Tail-Ref	chr12	52024114	52024114	G	C	Gpr33	c.141C>G	p.Asn47Lys	missense_variant	MODERATE	183	0	0.00645	71	25	0.339	6.7416
Aplan-10-3620-Thy_vs_Aplan-10th-Exp-NHD13-Donor-plus-Pooled-Tail-Ref	chr12	53069134	53069134	C	G	Akap6	c.3019C>G	p.His1007Asp	missense_variant	MODERATE	278	0	0.004522	101	23	0.214	6.86787
Aplan-10-3620-Thy_vs_Aplan-10th-Exp-NHD13-Donor-plus-Pooled-Tail-Ref	chr12	54068683	54068683	C	G	Npas3	c.2387C>G	p.Pro796Arg	missense_variant	MODERATE	97	0	0.012	15	5	0.356	4.65005
Aplan-10-3620-Thy_vs_Aplan-10th-Exp-NHD13-Donor-plus-Pooled-Tail-Ref	chr12	55565997	55565997	G	C	Aldoart2	c.706G>C	p.Ala236Pro	missense_variant	MODERATE	261	0	0.004548	83	19	0.267	6.49921
Aplan-10-3620-Thy_vs_Aplan-10th-Exp-NHD13-Donor-plus-Pooled-Tail-Ref	chr12	71075531	71075531	C	G	Arid4a	c.2685C>G	p.Ala895Ala	synonymous_variant	LOW	165	0	0.006806	45	10	0.215	7.06411
Aplan-10-3620-Thy_vs_Aplan-10th-Exp-NHD13-Donor-plus-Pooled-Tail-Ref	chr12	76773393	76773393	C	G	Churc1	c.175C>G	p.His59Asp	missense_variant&splice_region_variant	MODERATE	170	0	0.007123	61	11	0.204	6.6723
Aplan-10-3620-Thy_vs_Aplan-10th-Exp-NHD13-Donor-plus-Pooled-Tail-Ref	chr12	80719000	80719000	G	C	Plekhd1	c.738G>C	p.Thr246Thr	synonymous_variant	LOW	56	0	0.021	21	5	0.294	2.9872
Aplan-10-3620-Thy_vs_Aplan-10th-Exp-NHD13-Donor-plus-Pooled-Tail-Ref	chr12	84650224	84650224	C	G	Vrtn	c.1747C>G	p.Arg583Gly	missense_variant	MODERATE	167	0	0.006951	40	13	0.326	6.62792
Aplan-10-3620-Thy_vs_Aplan-10th-Exp-NHD13-Donor-plus-Pooled-Tail-Ref	chr12	85094780	85094780	C	G	Prox2	c.648G>C	p.Pro216Pro	synonymous_variant	LOW	205	0	0.00553	40	12	0.333	6.61062
Aplan-10-3620-Thy_vs_Aplan-10th-Exp-NHD13-Donor-plus-Pooled-Tail-Ref	chr12	98689315	98689315	G	C	Ptpn21	c.1392C>G	p.His464Gln	missense_variant	MODERATE	308	0	0.003741	53	15	0.266	6.65038
Aplan-10-3620-Thy_vs_Aplan-10th-Exp-NHD13-Donor-plus-Pooled-Tail-Ref	chr12	98699992	98699992	C	G	Ptpn21	c.819G>C	p.Leu273Leu	synonymous_variant	LOW	221	0	0.005978	98	16	0.2	6.95772
Aplan-10-3620-Thy_vs_Aplan-10th-Exp-NHD13-Donor-plus-Pooled-Tail-Ref	chr12	99910311	99910311	C	G	Tdp1	c.1084C>G	p.Arg362Gly	missense_variant	MODERATE	293	0	0.00415	125	34	0.267	6.4365
Aplan-10-3620-Thy_vs_Aplan-10th-Exp-NHD13-Donor-plus-Pooled-Tail-Ref	chr12	105218301	105218301	G	C	Tcl1	c.291+358C>G		intron_variant	MODIFIER	169	0	0.007509	71	20	0.272	6.92799
Aplan-10-3620-Thy_vs_Aplan-10th-Exp-NHD13-Donor-plus-Pooled-Tail-Ref	chr12	108311871	108311871	C	G	Hhipl1	c.457C>G	p.Arg153Gly	missense_variant	MODERATE	239	0	0.00485	58	12	0.204	7.15215
Aplan-10-3620-Thy_vs_Aplan-10th-Exp-NHD13-Donor-plus-Pooled-Tail-Ref	chr12	108311912	108311912	C	G	Hhipl1	c.498C>G	p.Ser166Arg	missense_variant	MODERATE	257	1	0.004631	58	13	0.236	6.08464
Aplan-10-3620-Thy_vs_Aplan-10th-Exp-NHD13-Donor-plus-Pooled-Tail-Ref	chr12	110629753	110629753	C	G	Dync1h1	c.4703+10C>G		intron_variant	MODIFIER	100	0	0.01	35	11	0.343	7.03044
Aplan-10-3620-Thy_vs_Aplan-10th-Exp-NHD13-Donor-plus-Pooled-Tail-Ref	chr12	110634403	110634403	C	G	Dync1h1	c.5971+25C>G		intron_variant	MODIFIER	67	0	0.018	27	6	0.241	3.43943
Aplan-10-3620-Thy_vs_Aplan-10th-Exp-NHD13-Donor-plus-Pooled-Tail-Ref	chr12	110866867	110866867	C	G	Zfp839	c.1837+42C>G		intron_variant	MODIFIER	87	2	0.027	17	7	0.375	4.56448
Aplan-10-3620-Thy_vs_Aplan-10th-Exp-NHD13-Donor-plus-Pooled-Tail-Ref	chr12	111325944	111325944	C	G	Cdc42bpb	c.1140+16G>C		intron_variant	MODIFIER	162	0	0.007267	56	17	0.294	6.29564
Aplan-10-3620-Thy_vs_Aplan-10th-Exp-NHD13-Donor-plus-Pooled-Tail-Ref	chr12	111429493	111429493	C	G	Exoc3l4	c.1939C>G	p.Arg647Gly	missense_variant	MODERATE	125	0	0.01	18	7	0.414	6.8174
Aplan-10-3620-Thy_vs_Aplan-10th-Exp-NHD13-Donor-plus-Pooled-Tail-Ref	chr12	112130957	112130957	C	G	Aspg	c.*4212C>G		downstream_gene_variant	MODIFIER	143	0	0.009182	16	6	0.455	6.40607
Aplan-10-3620-Thy_vs_Aplan-10th-Exp-NHD13-Donor-plus-Pooled-Tail-Ref	chr12	112415183	112415183	C	G	A730018C14Rik	n.291-1106G>C		intron_variant	MODIFIER	104	0	0.01	54	16	0.298	6.55237
Aplan-10-3620-Thy_vs_Aplan-10th-Exp-NHD13-Donor-plus-Pooled-Tail-Ref	chr12	112634227	112634227	C	G	Adssl1	c.560C>G	p.Ser187Trp	missense_variant	MODERATE	264	0	0.004552	45	9	0.2	6.03693
Aplan-10-3620-Thy_vs_Aplan-10th-Exp-NHD13-Donor-plus-Pooled-Tail-Ref	chr12	113188474	113188474	C	G	Tmem121	c.311C>G	p.Ala104Gly	missense_variant	MODERATE	157	1	0.007708	32	14	0.448	6.26552
Aplan-10-3620-Thy_vs_Aplan-10th-Exp-NHD13-Donor-plus-Pooled-Tail-Ref	chr13	12276425	12276425	C	G	Actn2	c.2092G>C	p.Asp698His	missense_variant	MODERATE	276	0	0.00478	22	9	0.369	6.83825
Aplan-10-3620-Thy_vs_Aplan-10th-Exp-NHD13-Donor-plus-Pooled-Tail-Ref	chr13	18862623	18862623	C	G	Vps41	c.2343C>G	p.Gly781Gly	synonymous_variant	LOW	357	3	0.006669	124	26	0.216	6.25465
Aplan-10-3620-Thy_vs_Aplan-10th-Exp-NHD13-Donor-plus-Pooled-Tail-Ref	chr13	19263403	19263403	C	G	Amph-Stard3nl	n.19263403C>G		intergenic_region	MODIFIER	259	0	0.004749	68	19	0.29	6.36746
Aplan-10-3620-Thy_vs_Aplan-10th-Exp-NHD13-Donor-plus-Pooled-Tail-Ref	chr13	19690875	19690875	C	G	Nme8	c.361G>C	p.Val121Leu	missense_variant	MODERATE	334	0	0.003745	132	37	0.293	6.5966
Aplan-10-3620-Thy_vs_Aplan-10th-Exp-NHD13-Donor-plus-Pooled-Tail-Ref	chr13	19729507	19729507	C	G	A530099J19Rik	c.374G>C	p.Arg125Pro	missense_variant	MODERATE	251	1	0.007961	86	26	0.276	6.41476
Aplan-10-3620-Thy_vs_Aplan-10th-Exp-NHD13-Donor-plus-Pooled-Tail-Ref	chr13	38192995	38192995	G	A	Dsp	c.4755G>A	p.Ala1585Ala	synonymous_variant	LOW	96	0	0.012	31	9	0.258	5.94403
Aplan-10-3620-Thy_vs_Aplan-10th-Exp-NHD13-Donor-plus-Pooled-Tail-Ref	chr13	41656275	41656275	G	C	Gm5082	c.264G>C	p.Thr88Thr	synonymous_variant	LOW	361	1	0.003438	94	28	0.31	6.26379
Aplan-10-3620-Thy_vs_Aplan-10th-Exp-NHD13-Donor-plus-Pooled-Tail-Ref	chr13	51649642	51649642	C	G	Cks2	c.117C>G	p.Ser39Ser	synonymous_variant	LOW	279	1	0.004551	98	26	0.268	6.20474
Aplan-10-3620-Thy_vs_Aplan-10th-Exp-NHD13-Donor-plus-Pooled-Tail-Ref	chr13	51656923	51656923	C	G	Secisbp2	c.620C>G	p.Ala207Gly	missense_variant	MODERATE	114	1	0.011	47	12	0.289	5.89325
Aplan-10-3620-Thy_vs_Aplan-10th-Exp-NHD13-Donor-plus-Pooled-Tail-Ref	chr13	55013224	55013224	C	G	Hk3	c.908+4G>C		splice_region_variant&intron_variant	LOW	87	0	0.013	26	11	0.409	6.0925
Aplan-10-3620-Thy_vs_Aplan-10th-Exp-NHD13-Donor-plus-Pooled-Tail-Ref	chr13	55166152	55166152	C	G	Fgfr4	c.1678C>G	p.Arg560Gly	missense_variant	MODERATE	159	0	0.007417	30	9	0.357	7.68885
Aplan-10-3620-Thy_vs_Aplan-10th-Exp-NHD13-Donor-plus-Pooled-Tail-Ref	chr13	55826259	55826259	G	C	Pitx1	c.758C>G	p.Ser253Trp	missense_variant	MODERATE	165	0	0.007279	15	5	0.313	5.69529
Aplan-10-3620-Thy_vs_Aplan-10th-Exp-NHD13-Donor-plus-Pooled-Tail-Ref	chr13	58808935	58808935	G	C	Ntrk2	c.207G>C	p.Thr69Thr	synonymous_variant	LOW	158	0	0.00807	26	5	0.231	4.40302
Aplan-10-3620-Thy_vs_Aplan-10th-Exp-NHD13-Donor-plus-Pooled-Tail-Ref	chr13	62871341	62871341	G	C	Fbp1	c.427-35C>G		intron_variant	MODIFIER	139	0	0.008915	49	13	0.256	6.46861
Aplan-10-3620-Thy_vs_Aplan-10th-Exp-NHD13-Donor-plus-Pooled-Tail-Ref	chr13	63210174	63210174	C	G	2010111I01Rik	c.1983+8C>G		splice_region_variant&intron_variant	LOW	280	0	0.004565	82	18	0.214	6.29381
Aplan-10-3620-Thy_vs_Aplan-10th-Exp-NHD13-Donor-plus-Pooled-Tail-Ref	chr13	64268043	64268043	C	G	Cdc14b	c.160+6548G>C		intron_variant	MODIFIER	223	1	0.005263	83	40	0.494	5.77893
Aplan-10-3620-Thy_vs_Aplan-10th-Exp-NHD13-Donor-plus-Pooled-Tail-Ref	chr13	64922658	64922658	C	G	Spata31	c.2619C>G	p.Pro873Pro	synonymous_variant	LOW	265	0	0.004507	73	16	0.234	6.54159
Aplan-10-3620-Thy_vs_Aplan-10th-Exp-NHD13-Donor-plus-Pooled-Tail-Ref	chr13	65559625	65559625	G	C	Zfp369-Gm10324	n.65559625G>C		intergenic_region	MODIFIER	369	0	0.003321	64	14	0.241	7.07173
Aplan-10-3620-Thy_vs_Aplan-10th-Exp-NHD13-Donor-plus-Pooled-Tail-Ref	chr13	73613677	73613677	C	G	Clptm1l	c.999C>G	p.Ser333Arg	missense_variant	MODERATE	116	0	0.011	45	17	0.359	7.20898
Aplan-10-3620-Thy_vs_Aplan-10th-Exp-NHD13-Donor-plus-Pooled-Tail-Ref	chr13	91774887	91774887	G	C	Acot12	c.1102G>C	p.Gly368Arg	missense_variant	MODERATE	240	0	0.005454	83	17	0.231	6.11456
Aplan-10-3620-Thy_vs_Aplan-10th-Exp-NHD13-Donor-plus-Pooled-Tail-Ref	chr13	92346766	92346766	C	G	Msh3	c.868G>C	p.Ala290Pro	missense_variant	MODERATE	170	0	0.00679	65	12	0.225	7.0434
Aplan-10-3620-Thy_vs_Aplan-10th-Exp-NHD13-Donor-plus-Pooled-Tail-Ref	chr13	93092064	93092064	C	G	Cmya5	c.6515G>C	p.Arg2172Pro	missense_variant	MODERATE	306	0	0.003746	68	17	0.242	6.95409
Aplan-10-3620-Thy_vs_Aplan-10th-Exp-NHD13-Donor-plus-Pooled-Tail-Ref	chr13	97114270	97114270	C	G	Fam169a	c.1097+11C>G		intron_variant	MODIFIER	143	0	0.008071	28	9	0.333	7.60493
Aplan-10-3620-Thy_vs_Aplan-10th-Exp-NHD13-Donor-plus-Pooled-Tail-Ref	chr13	100035798	100035798	G	C	Bdp1	c.6309C>G	p.Thr2103Thr	synonymous_variant	LOW	189	0	0.006758	60	14	0.228	6.03217
Aplan-10-3620-Thy_vs_Aplan-10th-Exp-NHD13-Donor-plus-Pooled-Tail-Ref	chr13	100607789	100607789	C	G	Marveld2	c.1161G>C	p.Ser387Ser	synonymous_variant	LOW	343	1	0.003912	104	30	0.268	6.39891
Aplan-10-3620-Thy_vs_Aplan-10th-Exp-NHD13-Donor-plus-Pooled-Tail-Ref	chr13	113346563	113346563	G	C	Esm1-4921509O07Rik	n.113346563G>C		intergenic_region	MODIFIER	165	0	0.006822	54	12	0.244	6.06393
Aplan-10-3620-Thy_vs_Aplan-10th-Exp-NHD13-Donor-plus-Pooled-Tail-Ref	chr14	8248010	8248010	G	C	Acox2	c.1271C>G	p.Pro424Arg	missense_variant	MODERATE	70	0	0.019	39	8	0.241	3.79064
Aplan-10-3620-Thy_vs_Aplan-10th-Exp-NHD13-Donor-plus-Pooled-Tail-Ref	chr14	21010130	21010130	C	G	Vcl	c.1836C>G	p.Ala612Ala	synonymous_variant	LOW	117	0	0.009823	33	7	0.276	4.83787
Aplan-10-3620-Thy_vs_Aplan-10th-Exp-NHD13-Donor-plus-Pooled-Tail-Ref	chr14	21664714	21664714	C	G	Kat6b	c.2715C>G	p.Asp905Glu	missense_variant	MODERATE	69	0	0.016	30	7	0.269	3.86407
Aplan-10-3620-Thy_vs_Aplan-10th-Exp-NHD13-Donor-plus-Pooled-Tail-Ref	chr14	23650086	23650086	G	C	Kcnma1	c.602+39C>G		intron_variant	MODIFIER	168	0	0.007672	83	18	0.218	6.23569
Aplan-10-3620-Thy_vs_Aplan-10th-Exp-NHD13-Donor-plus-Pooled-Tail-Ref	chr14	24621369	24621369	C	G	Rps24-4930572O13Rik	n.24621369C>G		intergenic_region	MODIFIER	204	0	0.005452	59	14	0.263	6.40551
Aplan-10-3620-Thy_vs_Aplan-10th-Exp-NHD13-Donor-plus-Pooled-Tail-Ref	chr14	25658238	25658238	C	G	Zmiz1	c.2821C>G	p.Leu941Val	missense_variant	MODERATE	205	0	0.0058	54	14	0.286	6.82109
Aplan-10-3620-Thy_vs_Aplan-10th-Exp-NHD13-Donor-plus-Pooled-Tail-Ref	chr14	30921456	30921456	G	C	Itih3	c.387-14C>G		intron_variant	MODIFIER	155	0	0.007302	68	15	0.237	6.60797
Aplan-10-3620-Thy_vs_Aplan-10th-Exp-NHD13-Donor-plus-Pooled-Tail-Ref	chr14	31286214	31286214	C	G	Dnah1	c.6326G>C	p.Arg2109Pro	missense_variant	MODERATE	214	0	0.005512	61	11	0.204	7.52224
Aplan-10-3620-Thy_vs_Aplan-10th-Exp-NHD13-Donor-plus-Pooled-Tail-Ref	chr14	44657321	44657321	C	G	BC061237-Gm8267	n.44657321C>G		intergenic_region	MODIFIER	300	0	0.003859	87	18	0.208	6.31665
Aplan-10-3620-Thy_vs_Aplan-10th-Exp-NHD13-Donor-plus-Pooled-Tail-Ref	chr14	46853905	46853905	C	G	Cgrrf1	c.885C>G	p.Cys295Trp	missense_variant	MODERATE	120	0	0.00996	23	7	0.293	5.93071
Aplan-10-3620-Thy_vs_Aplan-10th-Exp-NHD13-Donor-plus-Pooled-Tail-Ref	chr14	47531681	47531681	C	G	Fbxo34	c.*409C>G		3_prime_UTR_variant	MODIFIER	267	0	0.004412	85	19	0.213	6.48436
Aplan-10-3620-Thy_vs_Aplan-10th-Exp-NHD13-Donor-plus-Pooled-Tail-Ref	chr14	50643207	50643207	C	G	Olfr745	c.925C>G	p.Arg309Gly	missense_variant	MODERATE	322	0	0.003732	69	15	0.235	6.94354
Aplan-10-3620-Thy_vs_Aplan-10th-Exp-NHD13-Donor-plus-Pooled-Tail-Ref	chr14	51105544	51105544	G	C	Rnase4	c.*277G>C		3_prime_UTR_variant	MODIFIER	519	0	0.002339	108	24	0.228	6.31333
Aplan-10-3620-Thy_vs_Aplan-10th-Exp-NHD13-Donor-plus-Pooled-Tail-Ref	chr14	54516085	54516085	G	C	Prmt5	c.315+21C>G		intron_variant	MODIFIER	296	3	0.008476	69	14	0.21	6.73637
Aplan-10-3620-Thy_vs_Aplan-10th-Exp-NHD13-Donor-plus-Pooled-Tail-Ref	chr14	54626012	54626012	G	C	Psmb11	c.686G>C	p.Arg229Pro	missense_variant	MODERATE	160	0	0.007278	38	11	0.285	6.65374
Aplan-10-3620-Thy_vs_Aplan-10th-Exp-NHD13-Donor-plus-Pooled-Tail-Ref	chr14	55065262	55065262	G	C	Zfhx2	c.5264C>G	p.Pro1755Arg	missense_variant	MODERATE	194	0	0.006276	47	13	0.3	6.5021
Aplan-10-3620-Thy_vs_Aplan-10th-Exp-NHD13-Donor-plus-Pooled-Tail-Ref	chr14	55104430	55104430	C	G	Ap1g2	c.674G>C	p.Arg225Pro	missense_variant	MODERATE	148	0	0.007732	41	8	0.216	5.56074
Aplan-10-3620-Thy_vs_Aplan-10th-Exp-NHD13-Donor-plus-Pooled-Tail-Ref	chr14	55501561	55501561	G	C	Lrrc16b	c.2671G>C	p.Glu891Gln	missense_variant	MODERATE	212	0	0.005859	13	7	0.533	7.15902
Aplan-10-3620-Thy_vs_Aplan-10th-Exp-NHD13-Donor-plus-Pooled-Tail-Ref	chr14	55581636	55581636	C	G	Emc9	c.548G>C	p.Arg183Pro	missense_variant	MODERATE	239	0	0.004955	77	19	0.239	6.4704
Aplan-10-3620-Thy_vs_Aplan-10th-Exp-NHD13-Donor-plus-Pooled-Tail-Ref	chr14	55598819	55598819	C	G	Rnf31	c.2286+8C>G		splice_region_variant&intron_variant	LOW	349	0	0.003246	73	14	0.206	6.30197
Aplan-10-3620-Thy_vs_Aplan-10th-Exp-NHD13-Donor-plus-Pooled-Tail-Ref	chr14	55779771	55779771	C	G	Adcy4	c.862G>C	p.Glu288Gln	missense_variant	MODERATE	115	0	0.009464	23	6	0.26	4.93
Aplan-10-3620-Thy_vs_Aplan-10th-Exp-NHD13-Donor-plus-Pooled-Tail-Ref	chr14	55832422	55832422	G	C	Nfatc4	c.2256G>C	p.Thr752Thr	synonymous_variant	LOW	350	0	0.003493	48	9	0.201	6.67333
Aplan-10-3620-Thy_vs_Aplan-10th-Exp-NHD13-Donor-plus-Pooled-Tail-Ref	chr14	57100323	57100323	G	C	Gjb2	c.427C>G	p.Arg143Gly	missense_variant	MODERATE	230	0	0.004849	74	16	0.235	7.13629
Aplan-10-3620-Thy_vs_Aplan-10th-Exp-NHD13-Donor-plus-Pooled-Tail-Ref	chr14	61682293	61682293	G	C	Dleu2	n.81C>G		non_coding_transcript_exon_variant	MODIFIER	161	0	0.008073	17	5	0.286	5.35676
Aplan-10-3620-Thy_vs_Aplan-10th-Exp-NHD13-Donor-plus-Pooled-Tail-Ref	chr14	64210396	64210396	G	C	Msra	c.537+32C>G		intron_variant	MODIFIER	141	1	0.008252	32	17	0.481	6.88245
Aplan-10-3620-Thy_vs_Aplan-10th-Exp-NHD13-Donor-plus-Pooled-Tail-Ref	chr14	66037494	66037494	C	G	Adam2	c.1789G>C	p.Val597Leu	missense_variant	MODERATE	189	0	0.006204	51	13	0.271	6.062
Aplan-10-3620-Thy_vs_Aplan-10th-Exp-NHD13-Donor-plus-Pooled-Tail-Ref	chr14	66143428	66143428	C	G	Chrna2	c.145C>G	p.Arg49Gly	missense_variant	MODERATE	178	1	0.006884	48	13	0.232	6.78468
Aplan-10-3620-Thy_vs_Aplan-10th-Exp-NHD13-Donor-plus-Pooled-Tail-Ref	chr14	69796670	69796670	C	G	Rhobtb2	c.1105G>C	p.Gly369Arg	missense_variant	MODERATE	111	0	0.01	34	7	0.227	4.63254
Aplan-10-3620-Thy_vs_Aplan-10th-Exp-NHD13-Donor-plus-Pooled-Tail-Ref	chr14	70079284	70079284	G	C	Egr3	c.543G>C	p.Pro181Pro	synonymous_variant	LOW	397	0	0.003238	48	16	0.325	6.37684
Aplan-10-3620-Thy_vs_Aplan-10th-Exp-NHD13-Donor-plus-Pooled-Tail-Ref	chr14	70508751	70508751	G	C	Bmp1	c.447C>G	p.Thr149Thr	splice_region_variant&synonymous_variant	LOW	96	0	0.011	22	7	0.348	5.49016
Aplan-10-3620-Thy_vs_Aplan-10th-Exp-NHD13-Donor-plus-Pooled-Tail-Ref	chr14	70558036	70558036	G	C	Hr	c.1020G>C	p.Arg340Ser	missense_variant	MODERATE	106	0	0.01	32	7	0.25	4.68248
Aplan-10-3620-Thy_vs_Aplan-10th-Exp-NHD13-Donor-plus-Pooled-Tail-Ref	chr14	75963160	75963160	G	C	Kctd4	c.570G>C	p.Ser190Ser	synonymous_variant	LOW	272	0	0.00439	92	24	0.262	6.80332
Aplan-10-3620-Thy_vs_Aplan-10th-Exp-NHD13-Donor-plus-Pooled-Tail-Ref	chr14	78984282	78984282	C	G	Vwa8	c.1677C>G	p.Thr559Thr	synonymous_variant	LOW	152	0	0.008278	48	12	0.268	6.2413
Aplan-10-3620-Thy_vs_Aplan-10th-Exp-NHD13-Donor-plus-Pooled-Tail-Ref	chr14	79401759	79401759	G	C	Mtrf1	c.330G>C	p.Arg110Ser	missense_variant	MODERATE	165	0	0.007121	46	22	0.498	6.08005
Aplan-10-3620-Thy_vs_Aplan-10th-Exp-NHD13-Donor-plus-Pooled-Tail-Ref	chr14	79573333	79573333	G	C	Elf1	c.968G>C	p.Arg323Pro	missense_variant	MODERATE	144	1	0.008128	54	15	0.25	6.61556
Aplan-10-3620-Thy_vs_Aplan-10th-Exp-NHD13-Donor-plus-Pooled-Tail-Ref	chr14	79768966	79768966	G	C	Pcdh8	c.2156C>G	p.Pro719Arg	missense_variant	MODERATE	120	0	0.009379	15	5	0.4	5.0624
Aplan-10-3620-Thy_vs_Aplan-10th-Exp-NHD13-Donor-plus-Pooled-Tail-Ref	chr14	84446596	84446596	C	G	Pcdh17	c.502C>G	p.Arg168Gly	missense_variant	MODERATE	147	0	0.007614	50	17	0.32	6.43761
Aplan-10-3620-Thy_vs_Aplan-10th-Exp-NHD13-Donor-plus-Pooled-Tail-Ref	chr14	95882692	95882692	G	C	4921530L21Rik	c.*59G>C		3_prime_UTR_variant	MODIFIER	283	0	0.004193	122	27	0.228	6.79308
Aplan-10-3620-Thy_vs_Aplan-10th-Exp-NHD13-Donor-plus-Pooled-Tail-Ref	chr14	99062325	99062325	C	G	Bora	c.732C>G	p.Ser244Arg	missense_variant	MODERATE	219	0	0.005564	86	18	0.221	6.08674
Aplan-10-3620-Thy_vs_Aplan-10th-Exp-NHD13-Donor-plus-Pooled-Tail-Ref	chr14	101982006	101982006	G	A	Lmo7-Kctd12	n.101982006G>A		intergenic_region	MODIFIER	264	0	0.004328	68	15	0.263	6.19569
Aplan-10-3620-Thy_vs_Aplan-10th-Exp-NHD13-Donor-plus-Pooled-Tail-Ref	chr14	103703812	103703812	G	C	Slain1os	n.-4380C>G		upstream_gene_variant	MODIFIER	307	0	0.004193	56	18	0.293	6.26513
Aplan-10-3620-Thy_vs_Aplan-10th-Exp-NHD13-Donor-plus-Pooled-Tail-Ref	chr14	121237193	121237193	C	G	Farp1	c.817C>G	p.Arg273Gly	missense_variant	MODERATE	146	0	0.008577	39	7	0.2	4.9309
Aplan-10-3620-Thy_vs_Aplan-10th-Exp-NHD13-Donor-plus-Pooled-Tail-Ref	chr14	121462462	121462462	C	G	Slc15a1	c.1938+5G>C		splice_region_variant&intron_variant	LOW	170	0	0.007764	25	10	0.363	6.03764
Aplan-10-3620-Thy_vs_Aplan-10th-Exp-NHD13-Donor-plus-Pooled-Tail-Ref	chr15	31457398	31457398	G	C	44991	c.*1791C>G		3_prime_UTR_variant	MODIFIER	227	0	0.005443	62	16	0.264	6.64606
Aplan-10-3620-Thy_vs_Aplan-10th-Exp-NHD13-Donor-plus-Pooled-Tail-Ref	chr15	36151622	36151622	C	G	Fbxo43	c.*22G>C		3_prime_UTR_variant	MODIFIER	190	0	0.005873	40	21	0.525	6.88403
Aplan-10-3620-Thy_vs_Aplan-10th-Exp-NHD13-Donor-plus-Pooled-Tail-Ref	chr15	54747980	54747980	C	G	Nov	c.510C>G	p.Asp170Glu	missense_variant	MODERATE	94	0	0.012	36	7	0.218	4.10225
Aplan-10-3620-Thy_vs_Aplan-10th-Exp-NHD13-Donor-plus-Pooled-Tail-Ref	chr15	59366191	59366191	C	G	E430025E21Rik	c.683G>C	p.Arg228Pro	missense_variant	MODERATE	229	0	0.005308	54	12	0.24	7.29082
Aplan-10-3620-Thy_vs_Aplan-10th-Exp-NHD13-Donor-plus-Pooled-Tail-Ref	chr15	73557547	73557547	C	G	Dennd3	c.2713-35C>G		intron_variant	MODIFIER	132	0	0.009035	23	12	0.547	7.41088
Aplan-10-3620-Thy_vs_Aplan-10th-Exp-NHD13-Donor-plus-Pooled-Tail-Ref	chr15	74081004	74081004	G	C	Mroh5-Adgrb1	n.74081004G>C		intergenic_region	MODIFIER	150	0	0.007359	59	11	0.208	6.35724
Aplan-10-3620-Thy_vs_Aplan-10th-Exp-NHD13-Donor-plus-Pooled-Tail-Ref	chr15	74587079	74587079	C	G	Adgrb1	c.4029C>G	p.Tyr1343*	stop_gained	HIGH	311	0	0.004006	52	27	0.477	6.81762
Aplan-10-3620-Thy_vs_Aplan-10th-Exp-NHD13-Donor-plus-Pooled-Tail-Ref	chr15	75891306	75891306	G	C	Mroh6	c.-2583C>G		upstream_gene_variant	MODIFIER	179	0	0.006045	32	8	0.29	6.90847
Aplan-10-3620-Thy_vs_Aplan-10th-Exp-NHD13-Donor-plus-Pooled-Tail-Ref	chr15	76646454	76646454	C	A	Cyhr1	c.*884G>T		downstream_gene_variant	MODIFIER	188	0	0.006271	34	10	0.285	6.8148
Aplan-10-3620-Thy_vs_Aplan-10th-Exp-NHD13-Donor-plus-Pooled-Tail-Ref	chr15	78292547	78292547	C	G	Csf2rb2	c.644G>C	p.Arg215Pro	missense_variant	MODERATE	304	0	0.003873	95	21	0.221	6.58256
Aplan-10-3620-Thy_vs_Aplan-10th-Exp-NHD13-Donor-plus-Pooled-Tail-Ref	chr15	78410249	78410249	C	G	Mpst	c.180C>G	p.Phe60Leu	missense_variant	MODERATE	114	0	0.00992	38	21	0.556	6.94167
Aplan-10-3620-Thy_vs_Aplan-10th-Exp-NHD13-Donor-plus-Pooled-Tail-Ref	chr15	78410618	78410618	C	G	Mpst	c.549C>G	p.Ala183Ala	synonymous_variant	LOW	128	0	0.01	16	8	0.467	6.40599
Aplan-10-3620-Thy_vs_Aplan-10th-Exp-NHD13-Donor-plus-Pooled-Tail-Ref	chr15	78461273	78461273	C	G	Tmprss6	c.341G>C	p.Arg114Pro	missense_variant	MODERATE	133	2	0.019	14	5	0.462	4.15111
Aplan-10-3620-Thy_vs_Aplan-10th-Exp-NHD13-Donor-plus-Pooled-Tail-Ref	chr15	79524915	79524915	G	C	Kdelr3	c.304G>C	p.Val102Leu	missense_variant	MODERATE	237	1	0.01	54	10	0.214	6.65761
Aplan-10-3620-Thy_vs_Aplan-10th-Exp-NHD13-Donor-plus-Pooled-Tail-Ref	chr15	80395362	80395362	C	G	Cacna1i	c.6303C>G	p.Ser2101Ser	synonymous_variant	LOW	63	0	0.018	8	6	0.571	6.70884
Aplan-10-3620-Thy_vs_Aplan-10th-Exp-NHD13-Donor-plus-Pooled-Tail-Ref	chr15	80916826	80916826	C	G	Tnrc6b	c.4332C>G	p.Ile1444Met	missense_variant	MODERATE	67	0	0.018	25	11	0.417	7.08131
Aplan-10-3620-Thy_vs_Aplan-10th-Exp-NHD13-Donor-plus-Pooled-Tail-Ref	chr15	81705444	81705444	G	C	Rangap1	c.1700+9C>G		intron_variant	MODIFIER	166	0	0.006737	35	6	0.205	4.71877
Aplan-10-3620-Thy_vs_Aplan-10th-Exp-NHD13-Donor-plus-Pooled-Tail-Ref	chr15	81946824	81946824	C	G	Csdc2	c.71C>G	p.Thr24Arg	missense_variant	MODERATE	47	0	0.023	22	6	0.249	3.20592
Aplan-10-3620-Thy_vs_Aplan-10th-Exp-NHD13-Donor-plus-Pooled-Tail-Ref	chr15	82101005	82101005	C	G	Mei1	c.1994C>G	p.Thr665Ser	missense_variant	MODERATE	189	0	0.006694	33	15	0.395	6.85301
Aplan-10-3620-Thy_vs_Aplan-10th-Exp-NHD13-Donor-plus-Pooled-Tail-Ref	chr15	82103339	82103339	G	C	Mei1	c.2453G>C	p.Arg818Pro	missense_variant	MODERATE	226	0	0.005263	36	15	0.419	7.16098
Aplan-10-3620-Thy_vs_Aplan-10th-Exp-NHD13-Donor-plus-Pooled-Tail-Ref	chr15	85817351	85817351	G	C	Pkdrej	c.4383C>G	p.Ser1461Ser	synonymous_variant	LOW	201	2	0.005788	66	14	0.246	7.09744
Aplan-10-3620-Thy_vs_Aplan-10th-Exp-NHD13-Donor-plus-Pooled-Tail-Ref	chr15	85832338	85832338	C	G	Ttc38	c.-61C>G		5_prime_UTR_variant	MODIFIER	421	2	0.003328	26	6	0.25	6.25502
Aplan-10-3620-Thy_vs_Aplan-10th-Exp-NHD13-Donor-plus-Pooled-Tail-Ref	chr15	89185037	89185037	C	G	Dennd6b	c.1708G>C	p.Val570Leu	missense_variant	MODERATE	136	0	0.008589	38	11	0.273	6.08855
Aplan-10-3620-Thy_vs_Aplan-10th-Exp-NHD13-Donor-plus-Pooled-Tail-Ref	chr15	89259105	89259105	C	G	Ppp6r2	c.454C>G	p.Gln152Glu	missense_variant	MODERATE	71	0	0.017	36	10	0.29	5.14062
Aplan-10-3620-Thy_vs_Aplan-10th-Exp-NHD13-Donor-plus-Pooled-Tail-Ref	chr15	89352661	89352661	G	C	Lmf2	c.1377C>G	p.Gly459Gly	synonymous_variant	LOW	187	0	0.006064	41	13	0.333	6.95591
Aplan-10-3620-Thy_vs_Aplan-10th-Exp-NHD13-Donor-plus-Pooled-Tail-Ref	chr15	89387622	89387622	C	G	Klhdc7b	c.732C>G	p.His244Gln	missense_variant	MODERATE	205	0	0.005541	51	10	0.205	7.33888
Aplan-10-3620-Thy_vs_Aplan-10th-Exp-NHD13-Donor-plus-Pooled-Tail-Ref	chr15	93248466	93248466	G	C	Gxylt1	c.773C>G	p.Ala258Gly	missense_variant	MODERATE	209	0	0.005997	82	19	0.233	6.64693
Aplan-10-3620-Thy_vs_Aplan-10th-Exp-NHD13-Donor-plus-Pooled-Tail-Ref	chr15	94566927	94566927	G	C	Irak4	c.1347+30G>C		intron_variant	MODIFIER	617	1	0.003914	201	48	0.237	5.9616
Aplan-10-3620-Thy_vs_Aplan-10th-Exp-NHD13-Donor-plus-Pooled-Tail-Ref	chr15	96419863	96419863	C	G	Scaf11	c.1819G>C	p.Val607Leu	missense_variant	MODERATE	443	0	0.002676	137	59	0.433	5.87562
Aplan-10-3620-Thy_vs_Aplan-10th-Exp-NHD13-Donor-plus-Pooled-Tail-Ref	chr15	98042929	98042929	C	G	Senp1	c.1884G>C	p.Lys628Asn	missense_variant	MODERATE	238	0	0.005308	67	19	0.26	6.05872
Aplan-10-3620-Thy_vs_Aplan-10th-Exp-NHD13-Donor-plus-Pooled-Tail-Ref	chr15	99077803	99077803	C	G	Mir6960	n.-3002C>G		upstream_gene_variant	MODIFIER	156	0	0.007116	37	10	0.303	7.65086
Aplan-10-3620-Thy_vs_Aplan-10th-Exp-NHD13-Donor-plus-Pooled-Tail-Ref	chr15	100335307	100335307	C	G	Mettl7a3	c.378C>G	p.Val126Val	synonymous_variant	LOW	196	0	0.006263	66	14	0.224	7.15107
Aplan-10-3620-Thy_vs_Aplan-10th-Exp-NHD13-Donor-plus-Pooled-Tail-Ref	chr15	101491093	101491093	G	C	Krt85	c.210C>G	p.Ile70Met	missense_variant	MODERATE	215	0	0.005582	79	17	0.222	7.09632
Aplan-10-3620-Thy_vs_Aplan-10th-Exp-NHD13-Donor-plus-Pooled-Tail-Ref	chr15	101506270	101506270	G	C	Gm6042	n.239G>C		non_coding_transcript_exon_variant	MODIFIER	148	0	0.008218	40	9	0.275	6.38635
Aplan-10-3620-Thy_vs_Aplan-10th-Exp-NHD13-Donor-plus-Pooled-Tail-Ref	chr15	101550376	101550376	G	C	Krt82	c.228C>G	p.Phe76Leu	missense_variant	MODERATE	122	0	0.009085	27	6	0.249	4.66621
Aplan-10-3620-Thy_vs_Aplan-10th-Exp-NHD13-Donor-plus-Pooled-Tail-Ref	chr15	101801914	101801914	G	C	Krt73	c.384C>G	p.Arg128Arg	synonymous_variant	LOW	311	0	0.003817	81	15	0.2	6.097
Aplan-10-3620-Thy_vs_Aplan-10th-Exp-NHD13-Donor-plus-Pooled-Tail-Ref	chr15	101937857	101937857	C	G	Krt79	c.655G>C	p.Val219Leu	missense_variant	MODERATE	255	0	0.005053	29	12	0.417	7.20985
Aplan-10-3620-Thy_vs_Aplan-10th-Exp-NHD13-Donor-plus-Pooled-Tail-Ref	chr15	102179050	102179050	G	C	Csad	c.1077C>G	p.Arg359Arg	synonymous_variant	LOW	179	0	0.00718	45	11	0.282	6.37891
Aplan-10-3620-Thy_vs_Aplan-10th-Exp-NHD13-Donor-plus-Pooled-Tail-Ref	chr15	102223453	102223453	C	G	Itgb7	c.694G>C	p.Val232Leu	missense_variant	MODERATE	174	0	0.007046	21	10	0.5	6.74534
Aplan-10-3620-Thy_vs_Aplan-10th-Exp-NHD13-Donor-plus-Pooled-Tail-Ref	chr15	102927213	102927213	C	G	Hoxc13	c.775C>G	p.Arg259Gly	missense_variant	MODERATE	313	0	0.003887	42	9	0.243	6.77515
Aplan-10-3620-Thy_vs_Aplan-10th-Exp-NHD13-Donor-plus-Pooled-Tail-Ref	chr15	103034955	103034955	C	G	Hoxc4	c.233C>G	p.Ser78Trp	missense_variant	MODERATE	91	0	0.013	20	10	0.474	6.52269
Aplan-10-3620-Thy_vs_Aplan-10th-Exp-NHD13-Donor-plus-Pooled-Tail-Ref	chr16	4613449	4613449	G	C	Glis2	c.839G>C	p.Arg280Pro	missense_variant	MODERATE	190	0	0.006368	42	12	0.258	6.1446
Aplan-10-3620-Thy_vs_Aplan-10th-Exp-NHD13-Donor-plus-Pooled-Tail-Ref	chr16	16767013	16767013	C	G	Spag6l	c.1270G>C	p.Ala424Pro	missense_variant	MODERATE	207	0	0.005993	73	19	0.259	6.0747
Aplan-10-3620-Thy_vs_Aplan-10th-Exp-NHD13-Donor-plus-Pooled-Tail-Ref	chr16	17141207	17141207	G	C	Ccdc116	c.1617C>G	p.His539Gln	missense_variant	MODERATE	98	0	0.013	25	6	0.274	4.38011
Aplan-10-3620-Thy_vs_Aplan-10th-Exp-NHD13-Donor-plus-Pooled-Tail-Ref	chr16	17258239	17258239	G	C	Hic2	c.931G>C	p.Gly311Arg	missense_variant	MODERATE	124	0	0.009822	22	5	0.273	4.29201
Aplan-10-3620-Thy_vs_Aplan-10th-Exp-NHD13-Donor-plus-Pooled-Tail-Ref	chr16	17354954	17354954	G	C	Pi4ka	c.1563C>G	p.Ala521Ala	synonymous_variant	LOW	81	0	0.016	26	9	0.364	6.05976
Aplan-10-3620-Thy_vs_Aplan-10th-Exp-NHD13-Donor-plus-Pooled-Tail-Ref	chr16	19065604	19065604	C	G	Hira-Olfr164	n.19065604C>G		intergenic_region	MODIFIER	211	2	0.005531	69	23	0.356	6.70771
Aplan-10-3620-Thy_vs_Aplan-10th-Exp-NHD13-Donor-plus-Pooled-Tail-Ref	chr16	20692435	20692435	C	G	Eif4g1	c.*4C>G		3_prime_UTR_variant	MODIFIER	88	0	0.013	41	12	0.286	6.52008
Aplan-10-3620-Thy_vs_Aplan-10th-Exp-NHD13-Donor-plus-Pooled-Tail-Ref	chr16	20734444	20734444	C	G	Thpo	c.-5368G>C		upstream_gene_variant	MODIFIER	351	1	0.006862	45	10	0.256	7.16785
Aplan-10-3620-Thy_vs_Aplan-10th-Exp-NHD13-Donor-plus-Pooled-Tail-Ref	chr16	23157544	23157544	G	C	Adipoq	c.694G>C	p.Val232Leu	missense_variant	MODERATE	193	0	0.005422	29	6	0.207	5.51448
Aplan-10-3620-Thy_vs_Aplan-10th-Exp-NHD13-Donor-plus-Pooled-Tail-Ref	chr16	33961636	33961636	G	C	Umps	c.915C>G	p.His305Gln	missense_variant	MODERATE	276	0	0.004459	84	21	0.26	6.76837
Aplan-10-3620-Thy_vs_Aplan-10th-Exp-NHD13-Donor-plus-Pooled-Tail-Ref	chr16	34205248	34205248	C	G	Kalrn	c.3602G>C	p.Arg1201Pro	missense_variant	MODERATE	230	0	0.005387	66	16	0.236	6.40707
Aplan-10-3620-Thy_vs_Aplan-10th-Exp-NHD13-Donor-plus-Pooled-Tail-Ref	chr16	35647083	35647083	C	G	Sema5b	c.716C>G	p.Ala239Gly	missense_variant	MODERATE	165	0	0.007645	29	17	0.542	6.05667
Aplan-10-3620-Thy_vs_Aplan-10th-Exp-NHD13-Donor-plus-Pooled-Tail-Ref	chr16	44499596	44499596	G	A	Boc	c.1024C>T	p.Arg342*	stop_gained	HIGH	106	0	0.012	33	5	0.2	3.22894
Aplan-10-3620-Thy_vs_Aplan-10th-Exp-NHD13-Donor-plus-Pooled-Tail-Ref	chr16	48618558	48618558	C	G	Morc1	c.2315C>G	p.Ser772Cys	missense_variant	MODERATE	140	0	0.008817	42	16	0.405	6.46831
Aplan-10-3620-Thy_vs_Aplan-10th-Exp-NHD13-Donor-plus-Pooled-Tail-Ref	chr16	56652211	56652211	G	C	Abi3bp	c.2092G>C	p.Ala698Pro	missense_variant	MODERATE	310	1	0.003838	80	20	0.286	6.5389
Aplan-10-3620-Thy_vs_Aplan-10th-Exp-NHD13-Donor-plus-Pooled-Tail-Ref	chr16	64478541	64478541	C	G	Csnka2ip	c.127G>C	p.Ala43Pro	missense_variant	MODERATE	196	0	0.005811	94	21	0.241	6.60624
Aplan-10-3620-Thy_vs_Aplan-10th-Exp-NHD13-Donor-plus-Pooled-Tail-Ref	chr16	93369794	93369794	C	G	Mir802	n.75C>G		non_coding_transcript_exon_variant	MODIFIER	218	0	0.005858	57	13	0.231	6.13673
Aplan-10-3620-Thy_vs_Aplan-10th-Exp-NHD13-Donor-plus-Pooled-Tail-Ref	chr17	5752882	5752882	C	G	Zdhhc14	c.1259C>G	p.Thr420Arg	missense_variant	MODERATE	96	0	0.013	28	12	0.407	6.88152
Aplan-10-3620-Thy_vs_Aplan-10th-Exp-NHD13-Donor-plus-Pooled-Tail-Ref	chr17	20960589	20960589	C	G	Ppp2r1a	c.1252C>G	p.Arg418Gly	missense_variant	MODERATE	196	0	0.005739	74	24	0.329	6.33739
Aplan-10-3620-Thy_vs_Aplan-10th-Exp-NHD13-Donor-plus-Pooled-Tail-Ref	chr17	23676223	23676223	C	G	Tnfrsf12a	c.250G>C	p.Gly84Arg	missense_variant	MODERATE	121	0	0.01	48	16	0.317	6.44666
Aplan-10-3620-Thy_vs_Aplan-10th-Exp-NHD13-Donor-plus-Pooled-Tail-Ref	chr17	23732487	23732487	C	G	Pkmyt1	c.14C>G	p.Thr5Ser	missense_variant	MODERATE	246	0	0.005035	31	5	0.201	4.88723
Aplan-10-3620-Thy_vs_Aplan-10th-Exp-NHD13-Donor-plus-Pooled-Tail-Ref	chr17	24186000	24186000	G	C	Tbc1d24	c.169C>G	p.Arg57Gly	missense_variant	MODERATE	111	0	0.01	30	7	0.285	4.96767
Aplan-10-3620-Thy_vs_Aplan-10th-Exp-NHD13-Donor-plus-Pooled-Tail-Ref	chr17	24408241	24408241	C	G	Abca3	c.4680C>G	p.Ala1560Ala	synonymous_variant	LOW	109	0	0.011	24	8	0.336	6.42553
Aplan-10-3620-Thy_vs_Aplan-10th-Exp-NHD13-Donor-plus-Pooled-Tail-Ref	chr17	26012042	26012042	C	G	Rab11fip3	c.2228G>C	p.Arg743Pro	missense_variant	MODERATE	184	0	0.007018	48	15	0.253	6.2929
Aplan-10-3620-Thy_vs_Aplan-10th-Exp-NHD13-Donor-plus-Pooled-Tail-Ref	chr17	28552449	28552449	G	C	Clpsl2	c.248G>C	p.Arg83Pro	missense_variant	MODERATE	337	0	0.003908	80	24	0.302	6.74692
Aplan-10-3620-Thy_vs_Aplan-10th-Exp-NHD13-Donor-plus-Pooled-Tail-Ref	chr17	29308554	29308554	C	G	BC004004-Pi16	n.29308554C>G		intergenic_region	MODIFIER	820	3	0.004372	267	104	0.378	5.85981
Aplan-10-3620-Thy_vs_Aplan-10th-Exp-NHD13-Donor-plus-Pooled-Tail-Ref	chr17	30984050	30984050	C	G	Umodl1	c.1376C>G	p.Thr459Arg	missense_variant	MODERATE	173	0	0.007156	53	23	0.403	6.10611
Aplan-10-3620-Thy_vs_Aplan-10th-Exp-NHD13-Donor-plus-Pooled-Tail-Ref	chr17	31197648	31197648	C	G	Tmprss3	c.113G>C	p.Arg38Pro	missense_variant	MODERATE	173	0	0.006899	69	17	0.246	6.78094
Aplan-10-3620-Thy_vs_Aplan-10th-Exp-NHD13-Donor-plus-Pooled-Tail-Ref	chr17	32146537	32146537	C	G	Notch3	c.3200G>C	p.Arg1067Pro	missense_variant	MODERATE	239	0	0.005069	40	10	0.228	7.00457
Aplan-10-3620-Thy_vs_Aplan-10th-Exp-NHD13-Donor-plus-Pooled-Tail-Ref	chr17	32368056	32368056	G	C	Wiz	c.279C>G	p.Ala93Ala	synonymous_variant	LOW	135	0	0.008561	16	5	0.333	5.14637
Aplan-10-3620-Thy_vs_Aplan-10th-Exp-NHD13-Donor-plus-Pooled-Tail-Ref	chr17	33886835	33886835	G	C	Kifc1	c.85C>G	p.Arg29Gly	missense_variant	MODERATE	293	0	0.004081	96	23	0.253	6.4124
Aplan-10-3620-Thy_vs_Aplan-10th-Exp-NHD13-Donor-plus-Pooled-Tail-Ref	chr17	33958234	33958234	C	G	Rps18	c.-2614G>C		upstream_gene_variant	MODIFIER	212	0	0.005732	37	10	0.257	6.89586
Aplan-10-3620-Thy_vs_Aplan-10th-Exp-NHD13-Donor-plus-Pooled-Tail-Ref	chr17	34027056	34027056	C	G	H2-Ke6	c.520G>C	p.Val174Leu	missense_variant	MODERATE	319	0	0.003757	71	13	0.212	6.6746
Aplan-10-3620-Thy_vs_Aplan-10th-Exp-NHD13-Donor-plus-Pooled-Tail-Ref	chr17	34093876	34093876	C	G	H2-Oa	c.126C>G	p.Tyr42*	stop_gained	HIGH	204	0	0.006033	31	8	0.25	7.41371
Aplan-10-3620-Thy_vs_Aplan-10th-Exp-NHD13-Donor-plus-Pooled-Tail-Ref	chr17	34183709	34183709	G	C	Psmb9	c.296C>G	p.Ala99Gly	missense_variant	MODERATE	310	3	0.012	63	18	0.288	6.73486
Aplan-10-3620-Thy_vs_Aplan-10th-Exp-NHD13-Donor-plus-Pooled-Tail-Ref	chr17	34671477	34671477	C	G	Tnxb	c.793C>G	p.Arg265Gly	missense_variant	MODERATE	200	0	0.006181	17	5	0.333	5.79141
Aplan-10-3620-Thy_vs_Aplan-10th-Exp-NHD13-Donor-plus-Pooled-Tail-Ref	chr17	34802736	34802736	C	G	Cyp21a1	c.856G>C	p.Gly286Arg	missense_variant	MODERATE	88	0	0.014	23	5	0.249	3.5808
Aplan-10-3620-Thy_vs_Aplan-10th-Exp-NHD13-Donor-plus-Pooled-Tail-Ref	chr17	34876242	34876242	G	C	C2	c.648C>G	p.Tyr216*	stop_gained	HIGH	243	0	0.004622	70	19	0.262	7.05335
Aplan-10-3620-Thy_vs_Aplan-10th-Exp-NHD13-Donor-plus-Pooled-Tail-Ref	chr17	35160113	35160113	C	G	Prrc2a	c.1057G>C	p.Glu353Gln	missense_variant	MODERATE	546	1	0.002327	61	22	0.34	6.6781
Aplan-10-3620-Thy_vs_Aplan-10th-Exp-NHD13-Donor-plus-Pooled-Tail-Ref	chr17	35556003	35556003	C	G	Cdsn	c.1428C>G	p.Cys476Trp	missense_variant	MODERATE	334	0	0.003559	42	12	0.305	6.69351
Aplan-10-3620-Thy_vs_Aplan-10th-Exp-NHD13-Donor-plus-Pooled-Tail-Ref	chr17	47395703	47395703	C	G	Guca1a	c.202-6G>C		splice_region_variant&intron_variant	LOW	234	1	0.005417	32	16	0.464	6.98444
Aplan-10-3620-Thy_vs_Aplan-10th-Exp-NHD13-Donor-plus-Pooled-Tail-Ref	chr17	47413826	47413826	C	G	1700001C19Rik	c.369G>C	p.Pro123Pro	synonymous_variant	LOW	142	0	0.008517	27	6	0.24	4.99971
Aplan-10-3620-Thy_vs_Aplan-10th-Exp-NHD13-Donor-plus-Pooled-Tail-Ref	chr17	56310661	56310661	C	G	Uhrf1	c.397-15C>G		intron_variant	MODIFIER	134	0	0.009266	34	8	0.25	5.86444
Aplan-10-3620-Thy_vs_Aplan-10th-Exp-NHD13-Donor-plus-Pooled-Tail-Ref	chr17	56320217	56320217	C	G	Uhrf1	c.1886C>G	p.Pro629Arg	missense_variant	MODERATE	158	0	0.007087	40	10	0.236	7.37835
Aplan-10-3620-Thy_vs_Aplan-10th-Exp-NHD13-Donor-plus-Pooled-Tail-Ref	chr17	57257310	57257310	C	G	Trip10	c.1228C>G	p.Arg410Gly	missense_variant	MODERATE	169	0	0.007572	55	12	0.225	6.0773
Aplan-10-3620-Thy_vs_Aplan-10th-Exp-NHD13-Donor-plus-Pooled-Tail-Ref	chr17	64671904	64671904	C	G	Man2a1	c.1428C>G	p.Ala476Ala	synonymous_variant	LOW	152	0	0.008305	69	13	0.224	6.93941
Aplan-10-3620-Thy_vs_Aplan-10th-Exp-NHD13-Donor-plus-Pooled-Tail-Ref	chr17	65937819	65937819	C	G	Twsg1	c.202G>C	p.Glu68Gln	missense_variant	MODERATE	65	0	0.02	16	6	0.4	4.60774
Aplan-10-3620-Thy_vs_Aplan-10th-Exp-NHD13-Donor-plus-Pooled-Tail-Ref	chr17	66377929	66377929	C	G	Mtcl1	c.2864G>C	p.Arg955Pro	missense_variant	MODERATE	65	0	0.02	12	5	0.428	4.39701
Aplan-10-3620-Thy_vs_Aplan-10th-Exp-NHD13-Donor-plus-Pooled-Tail-Ref	chr17	66438291	66438291	C	G	Mtcl1	c.1130G>C	p.Arg377Pro	missense_variant	MODERATE	305	1	0.007845	28	7	0.222	6.97585
Aplan-10-3620-Thy_vs_Aplan-10th-Exp-NHD13-Donor-plus-Pooled-Tail-Ref	chr17	71709594	71709594	G	C	Fam179a	c.1942G>C	p.Gly648Arg	missense_variant	MODERATE	178	0	0.006887	30	7	0.231	6.17097
Aplan-10-3620-Thy_vs_Aplan-10th-Exp-NHD13-Donor-plus-Pooled-Tail-Ref	chr17	79509200	79509200	C	G	Gm10494	n.710+12G>C		intron_variant	MODIFIER	100	0	0.012	31	7	0.233	4.62778
Aplan-10-3620-Thy_vs_Aplan-10th-Exp-NHD13-Donor-plus-Pooled-Tail-Ref	chr17	81052856	81052856	C	G	Thumpd2	c.750+39G>C		intron_variant	MODIFIER	150	0	0.008112	54	15	0.313	6.18903
Aplan-10-3620-Thy_vs_Aplan-10th-Exp-NHD13-Donor-plus-Pooled-Tail-Ref	chr18	9214287	9214287	G	C	Fzd8	c.1368G>C	p.Ala456Ala	synonymous_variant	LOW	141	0	0.008287	22	5	0.217	4.53435
Aplan-10-3620-Thy_vs_Aplan-10th-Exp-NHD13-Donor-plus-Pooled-Tail-Ref	chr18	20601317	20601317	C	G	Dsg2	c.2351C>G	p.Ala784Gly	missense_variant	MODERATE	194	0	0.006277	46	12	0.289	7.34135
Aplan-10-3620-Thy_vs_Aplan-10th-Exp-NHD13-Donor-plus-Pooled-Tail-Ref	chr18	24230804	24230804	G	C	Galnt1	c.-160-1795G>C		intron_variant	MODIFIER	271	0	0.004745	92	19	0.22	6.155
Aplan-10-3620-Thy_vs_Aplan-10th-Exp-NHD13-Donor-plus-Pooled-Tail-Ref	chr18	31994319	31994319	G	A	Myo7b	c.1929C>T	p.Ile643Ile	synonymous_variant	LOW	120	0	0.011	21	10	0.429	7.23886
Aplan-10-3620-Thy_vs_Aplan-10th-Exp-NHD13-Donor-plus-Pooled-Tail-Ref	chr18	34823502	34823502	C	G	Kdm3b	c.3509C>G	p.Ala1170Gly	missense_variant	MODERATE	156	0	0.008017	48	9	0.201	5.92462
Aplan-10-3620-Thy_vs_Aplan-10th-Exp-NHD13-Donor-plus-Pooled-Tail-Ref	chr18	34970088	34970088	G	C	Hspa9-Ctnna1	n.34970088G>C		intergenic_region	MODIFIER	216	0	0.005508	44	9	0.219	7.26359
Aplan-10-3620-Thy_vs_Aplan-10th-Exp-NHD13-Donor-plus-Pooled-Tail-Ref	chr18	35252720	35252720	G	C	Ctnna1	c.2403G>C	p.Gln801His	missense_variant	MODERATE	184	0	0.006972	27	7	0.28	6.57544
Aplan-10-3620-Thy_vs_Aplan-10th-Exp-NHD13-Donor-plus-Pooled-Tail-Ref	chr18	36765142	36765142	G	C	Dnd1	c.558C>G	p.Phe186Leu	missense_variant	MODERATE	102	0	0.013	26	5	0.2	3.60444
Aplan-10-3620-Thy_vs_Aplan-10th-Exp-NHD13-Donor-plus-Pooled-Tail-Ref	chr18	36931898	36931898	G	C	Pcdha1	c.1614G>C	p.Ala538Ala	synonymous_variant	LOW	449	0	0.002559	167	37	0.235	6.11045
Aplan-10-3620-Thy_vs_Aplan-10th-Exp-NHD13-Donor-plus-Pooled-Tail-Ref	chr18	36932265	36932265	G	C	Pcdha1	c.1981G>C	p.Ala661Pro	missense_variant	MODERATE	338	0	0.003284	113	26	0.248	6.83969
Aplan-10-3620-Thy_vs_Aplan-10th-Exp-NHD13-Donor-plus-Pooled-Tail-Ref	chr18	36954374	36954374	G	C	Gm37013	c.1609G>C	p.Ala537Pro	missense_variant	MODERATE	459	0	0.002657	169	36	0.221	6.50992
Aplan-10-3620-Thy_vs_Aplan-10th-Exp-NHD13-Donor-plus-Pooled-Tail-Ref	chr18	37742654	37742654	G	C	Pcdhgb6	c.414G>C	p.Thr138Thr	synonymous_variant	LOW	306	0	0.003608	87	22	0.267	6.61972
Aplan-10-3620-Thy_vs_Aplan-10th-Exp-NHD13-Donor-plus-Pooled-Tail-Ref	chr18	41986547	41986547	C	G	Grxcr2	c.727G>C	p.Glu243Gln	missense_variant	MODERATE	235	0	0.00526	43	12	0.243	6.81057
Aplan-10-3620-Thy_vs_Aplan-10th-Exp-NHD13-Donor-plus-Pooled-Tail-Ref	chr18	41998967	41998967	G	C	Grxcr2	c.36C>G	p.Ser12Arg	missense_variant	MODERATE	169	0	0.007047	28	5	0.207	4.37847
Aplan-10-3620-Thy_vs_Aplan-10th-Exp-NHD13-Donor-plus-Pooled-Tail-Ref	chr18	52871347	52871347	G	C	Sncaip	c.1045G>C	p.Gly349Arg	missense_variant	MODERATE	172	0	0.007288	41	9	0.237	6.77676
Aplan-10-3620-Thy_vs_Aplan-10th-Exp-NHD13-Donor-plus-Pooled-Tail-Ref	chr18	53194423	53194423	C	G	Snx2	c.227-7C>G		splice_region_variant&intron_variant	LOW	282	0	0.004422	39	8	0.229	7.6193
Aplan-10-3620-Thy_vs_Aplan-10th-Exp-NHD13-Donor-plus-Pooled-Tail-Ref	chr18	61973330	61973330	G	C	Sh3tc2	c.429G>C	p.Thr143Thr	synonymous_variant	LOW	150	0	0.007684	42	15	0.335	6.08383
Aplan-10-3620-Thy_vs_Aplan-10th-Exp-NHD13-Donor-plus-Pooled-Tail-Ref	chr18	74787109	74787109	C	G	Acaa2	c.17-10C>G		intron_variant	MODIFIER	167	0	0.006603	49	15	0.306	7.10979
Aplan-10-3620-Thy_vs_Aplan-10th-Exp-NHD13-Donor-plus-Pooled-Tail-Ref	chr18	77441697	77441697	G	C	Loxhd1	c.6035G>C	p.Arg2012Pro	missense_variant	MODERATE	183	2	0.013	59	18	0.316	6.09564
Aplan-10-3620-Thy_vs_Aplan-10th-Exp-NHD13-Donor-plus-Pooled-Tail-Ref	chr19	3887371	3887371	G	C	Chka	c.858-18G>C		intron_variant	MODIFIER	315	0	0.004005	91	31	0.361	6.76486
Aplan-10-3620-Thy_vs_Aplan-10th-Exp-NHD13-Donor-plus-Pooled-Tail-Ref	chr19	3909252	3909252	G	C	Ndufs8	c.408C>G	p.Ala136Ala	synonymous_variant	LOW	93	0	0.013	13	6	0.5	5.99744
Aplan-10-3620-Thy_vs_Aplan-10th-Exp-NHD13-Donor-plus-Pooled-Tail-Ref	chr19	3942751	3942751	C	G	Unc93b1	c.902C>G	p.Pro301Arg	missense_variant	MODERATE	240	0	0.005234	35	6	0.206	5.54445
Aplan-10-3620-Thy_vs_Aplan-10th-Exp-NHD13-Donor-plus-Pooled-Tail-Ref	chr19	4001220	4001220	C	G	Nudt8	c.219C>G	p.Pro73Pro	synonymous_variant	LOW	99	0	0.012	19	8	0.4	6.98581
Aplan-10-3620-Thy_vs_Aplan-10th-Exp-NHD13-Donor-plus-Pooled-Tail-Ref	chr19	4041672	4041672	C	G	Gstp2	c.56G>C	p.Arg19Pro	missense_variant	MODERATE	356	1	0.003436	90	22	0.253	6.7691
Aplan-10-3620-Thy_vs_Aplan-10th-Exp-NHD13-Donor-plus-Pooled-Tail-Ref	chr19	4166260	4166260	G	C	Carns1	c.1922C>G	p.Ser641Trp	missense_variant	MODERATE	109	0	0.009955	33	9	0.282	6.11225
Aplan-10-3620-Thy_vs_Aplan-10th-Exp-NHD13-Donor-plus-Pooled-Tail-Ref	chr19	4287830	4287830	G	C	Adrbk1	c.1647C>G	p.His549Gln	missense_variant	MODERATE	134	0	0.008469	38	8	0.237	5.51762
Aplan-10-3620-Thy_vs_Aplan-10th-Exp-NHD13-Donor-plus-Pooled-Tail-Ref	chr19	4456497	4456497	G	C	Syt12	c.619C>G	p.Arg207Gly	missense_variant&splice_region_variant	MODERATE	140	1	0.018	20	8	0.352	6.92731
Aplan-10-3620-Thy_vs_Aplan-10th-Exp-NHD13-Donor-plus-Pooled-Tail-Ref	chr19	4859428	4859428	C	G	Ctsf	c.1005C>G	p.Tyr335*	stop_gained	HIGH	292	0	0.003873	59	18	0.288	6.9516
Aplan-10-3620-Thy_vs_Aplan-10th-Exp-NHD13-Donor-plus-Pooled-Tail-Ref	chr19	5068785	5068785	C	G	Cd248	c.660C>G	p.Gly220Gly	synonymous_variant	LOW	216	0	0.005396	45	8	0.226	6.34701
Aplan-10-3620-Thy_vs_Aplan-10th-Exp-NHD13-Donor-plus-Pooled-Tail-Ref	chr19	5069148	5069148	C	G	Cd248	c.1023C>G	p.His341Gln	missense_variant	MODERATE	160	0	0.00718	34	8	0.258	6.37436
Aplan-10-3620-Thy_vs_Aplan-10th-Exp-NHD13-Donor-plus-Pooled-Tail-Ref	chr19	5302678	5302678	G	C	Gal3st3	c.125+7G>C		splice_region_variant&intron_variant	LOW	45	0	0.026	15	7	0.5	4.77827
Aplan-10-3620-Thy_vs_Aplan-10th-Exp-NHD13-Donor-plus-Pooled-Tail-Ref	chr19	5502860	5502860	G	C	1700020D05Rik	c.*7C>G		3_prime_UTR_variant	MODIFIER	144	0	0.007747	39	14	0.359	6.8949
Aplan-10-3620-Thy_vs_Aplan-10th-Exp-NHD13-Donor-plus-Pooled-Tail-Ref	chr19	5638371	5638371	C	G	Rela	c.8-61C>G		intron_variant	MODIFIER	367	0	0.003469	60	12	0.2	7.10183
Aplan-10-3620-Thy_vs_Aplan-10th-Exp-NHD13-Donor-plus-Pooled-Tail-Ref	chr19	5654012	5654012	C	G	Sipa1	c.2281G>C	p.Gly761Arg	missense_variant	MODERATE	50	1	0.022	10	5	0.4	3.59198
Aplan-10-3620-Thy_vs_Aplan-10th-Exp-NHD13-Donor-plus-Pooled-Tail-Ref	chr19	6122113	6122113	G	C	Snx15	c.299C>G	p.Ala100Gly	missense_variant	MODERATE	122	0	0.009963	21	9	0.451	6.32668
Aplan-10-3620-Thy_vs_Aplan-10th-Exp-NHD13-Donor-plus-Pooled-Tail-Ref	chr19	6251304	6251304	C	G	Atg2a	c.2407C>G	p.Arg803Gly	missense_variant	MODERATE	212	0	0.005641	34	7	0.212	6.26596
Aplan-10-3620-Thy_vs_Aplan-10th-Exp-NHD13-Donor-plus-Pooled-Tail-Ref	chr19	6853902	6853902	G	C	Ccdc88b	c.1671C>G	p.Pro557Pro	synonymous_variant	LOW	172	0	0.006561	49	9	0.217	6.1554
Aplan-10-3620-Thy_vs_Aplan-10th-Exp-NHD13-Donor-plus-Pooled-Tail-Ref	chr19	6855614	6855614	G	C	Ccdc88b	c.918+38C>G		intron_variant	MODIFIER	241	0	0.005413	35	9	0.273	6.59206
Aplan-10-3620-Thy_vs_Aplan-10th-Exp-NHD13-Donor-plus-Pooled-Tail-Ref	chr19	6964578	6964578	G	C	Plcb3	c.865+19C>G		intron_variant	MODIFIER	107	0	0.011	23	6	0.291	4.7714
Aplan-10-3620-Thy_vs_Aplan-10th-Exp-NHD13-Donor-plus-Pooled-Tail-Ref	chr19	7002159	7002159	G	C	Trpt1	c.*3173G>C		downstream_gene_variant	MODIFIER	64	0	0.017	15	8	0.5	6.60791
Aplan-10-3620-Thy_vs_Aplan-10th-Exp-NHD13-Donor-plus-Pooled-Tail-Ref	chr19	8679292	8679292	C	G	Chrm1	c.1360C>G	p.Arg454Gly	missense_variant	MODERATE	106	1	0.011	29	7	0.25	4.11559
Aplan-10-3620-Thy_vs_Aplan-10th-Exp-NHD13-Donor-plus-Pooled-Tail-Ref	chr19	10597374	10597374	C	G	Tkfc	c.501G>C	p.Leu167Leu	synonymous_variant	LOW	246	0	0.005136	31	12	0.339	6.81888
Aplan-10-3620-Thy_vs_Aplan-10th-Exp-NHD13-Donor-plus-Pooled-Tail-Ref	chr19	10664740	10664740	C	G	Vwce	c.*39C>G		3_prime_UTR_variant	MODIFIER	178	0	0.006594	64	13	0.232	6.27636
Aplan-10-3620-Thy_vs_Aplan-10th-Exp-NHD13-Donor-plus-Pooled-Tail-Ref	chr19	12429783	12429783	C	G	Pfpl	c.1397C>G	p.Ala466Gly	missense_variant	MODERATE	368	0	0.003168	164	36	0.222	5.73023
Aplan-10-3620-Thy_vs_Aplan-10th-Exp-NHD13-Donor-plus-Pooled-Tail-Ref	chr19	25678252	25678252	C	G	Dmrt2	c.1214C>G	p.Pro405Arg	missense_variant	MODERATE	189	0	0.005751	61	12	0.21	6.07128
Aplan-10-3620-Thy_vs_Aplan-10th-Exp-NHD13-Donor-plus-Pooled-Tail-Ref	chr19	32819875	32819875	G	C	Pten	c.1059G>C	p.Glu353Asp	missense_variant	MODERATE	185	0	0.006592	67	29	0.421	6.39301
Aplan-10-3620-Thy_vs_Aplan-10th-Exp-NHD13-Donor-plus-Pooled-Tail-Ref	chr19	34500134	34500134	G	C	Lipa	c.851C>G	p.Ala284Gly	missense_variant	MODERATE	327	0	0.003962	117	22	0.206	6.36591
Aplan-10-3620-Thy_vs_Aplan-10th-Exp-NHD13-Donor-plus-Pooled-Tail-Ref	chr19	37287114	37287114	G	C	Ide	c.2016C>G	p.Asp672Glu	missense_variant&splice_region_variant	MODERATE	138	0	0.008767	29	7	0.259	5.60791
Aplan-10-3620-Thy_vs_Aplan-10th-Exp-NHD13-Donor-plus-Pooled-Tail-Ref	chr19	37330577	37330577	G	C	Ide	c.35C>G	p.Pro12Arg	missense_variant	MODERATE	220	0	0.005805	63	18	0.313	6.50929
Aplan-10-3620-Thy_vs_Aplan-10th-Exp-NHD13-Donor-plus-Pooled-Tail-Ref	chr19	37936090	37936090	C	G	Myof	c.3793G>C	p.Val1265Leu	missense_variant	MODERATE	240	0	0.004622	71	21	0.288	7.00043
Aplan-10-3620-Thy_vs_Aplan-10th-Exp-NHD13-Donor-plus-Pooled-Tail-Ref	chr19	38069127	38069127	G	C	Cep55	c.576G>C	p.Glu192Asp	missense_variant	MODERATE	184	1	0.007013	59	18	0.314	6.63533
Aplan-10-3620-Thy_vs_Aplan-10th-Exp-NHD13-Donor-plus-Pooled-Tail-Ref	chr19	40608982	40608982	G	C	Tctn3	c.623C>G	p.Pro208Arg	missense_variant	MODERATE	177	0	0.006765	39	19	0.469	6.38387
Aplan-10-3620-Thy_vs_Aplan-10th-Exp-NHD13-Donor-plus-Pooled-Tail-Ref	chr19	40912765	40912765	G	C	Zfp518a	c.1137G>C	p.Glu379Asp	missense_variant	MODERATE	220	0	0.00504	58	11	0.204	6.12786
Aplan-10-3620-Thy_vs_Aplan-10th-Exp-NHD13-Donor-plus-Pooled-Tail-Ref	chr19	41287538	41287538	C	G	Pik3ap1	c.2102G>C	p.Ser701Thr	missense_variant	MODERATE	150	0	0.008099	33	9	0.3	7.12929
Aplan-10-3620-Thy_vs_Aplan-10th-Exp-NHD13-Donor-plus-Pooled-Tail-Ref	chr19	44493656	44493656	G	C	Wnt8b	c.107G>C	p.Arg36Pro	missense_variant	MODERATE	229	2	0.01	60	13	0.231	6.1736
Aplan-10-3620-Thy_vs_Aplan-10th-Exp-NHD13-Donor-plus-Pooled-Tail-Ref	chr19	45007781	45007781	C	G	Peo1	c.652C>G	p.Arg218Gly	missense_variant	MODERATE	178	0	0.006401	63	15	0.214	6.18589
Aplan-10-3620-Thy_vs_Aplan-10th-Exp-NHD13-Donor-plus-Pooled-Tail-Ref	chr19	45026360	45026360	C	G	Lzts2	c.1891C>G	p.Arg631Gly	missense_variant	MODERATE	125	0	0.009541	13	7	0.583	7.97505
Aplan-10-3620-Thy_vs_Aplan-10th-Exp-NHD13-Donor-plus-Pooled-Tail-Ref	chr19	46314645	46314645	C	G	Psd	c.2294G>C	p.Arg765Pro	missense_variant	MODERATE	121	0	0.009634	30	7	0.25	5.18039
Aplan-10-3620-Thy_vs_Aplan-10th-Exp-NHD13-Donor-plus-Pooled-Tail-Ref	chr19	47015719	47015719	G	C	Ina	c.965G>C	p.Arg322Pro	missense_variant	MODERATE	216	1	0.005871	35	12	0.351	6.76737
Aplan-10-3620-Thy_vs_Aplan-10th-Exp-NHD13-Donor-plus-Pooled-Tail-Ref	chr19	47125196	47125196	G	C	Pdcd11	c.4058+29G>C		intron_variant	MODIFIER	131	0	0.009092	38	8	0.205	5.45519
Aplan-10-3620-Thy_vs_Aplan-10th-Exp-NHD13-Donor-plus-Pooled-Tail-Ref	chr19	56478478	56478478	C	G	Plekhs1	c.740C>G	p.Pro247Arg	missense_variant	MODERATE	157	0	0.007932	45	12	0.258	6.62905
Aplan-10-3620-Thy_vs_Aplan-10th-Exp-NHD13-Donor-plus-Pooled-Tail-Ref	chrX	8155460	8155460	G	C	Tbc1d25	c.1474C>G	p.Pro492Ala	missense_variant	MODERATE	145	0	0.00757	18	13	0.684	6.80581
Aplan-10-3620-Thy_vs_Aplan-10th-Exp-NHD13-Donor-plus-Pooled-Tail-Ref	chrX	8199077	8199077	C	G	Porcn	c.1163G>C	p.Arg388Pro	missense_variant	MODERATE	215	0	0.005735	32	12	0.321	6.23904
Aplan-10-3620-Thy_vs_Aplan-10th-Exp-NHD13-Donor-plus-Pooled-Tail-Ref	chrX	48272896	48272896	C	G	Utp14a	c.634C>G	p.Leu212Val	missense_variant	MODERATE	178	0	0.006787	44	13	0.282	6.45718
Aplan-10-3620-Thy_vs_Aplan-10th-Exp-NHD13-Donor-plus-Pooled-Tail-Ref	chrX	73861178	73861178	G	C	L1cam	c.1570C>G	p.Arg524Gly	missense_variant	MODERATE	278	0	0.004187	35	10	0.303	6.36598
Aplan-10-3620-Thy_vs_Aplan-10th-Exp-NHD13-Donor-plus-Pooled-Tail-Ref	chrX	74171318	74171318	G	C	Tex28	c.-4534C>G		upstream_gene_variant	MODIFIER	127	0	0.007668	32	8	0.264	5.906
Aplan-10-3620-Thy_vs_Aplan-10th-Exp-NHD13-Donor-plus-Pooled-Tail-Ref	chrX	117903022	117903022	C	T	Gm14920-Tgif2lx2	n.117903022C>T		intergenic_region	MODIFIER	115	0	0.01	20	5	0.264	4.34951
Aplan-10-3620-Thy_vs_Aplan-10th-Exp-NHD13-Donor-plus-Pooled-Tail-Ref	chrX	135746711	135746711	C	G	Armcx5	c.1535C>G	p.Ala512Gly	missense_variant	MODERATE	185	0	0.006298	27	10	0.32	6.02273
Aplan-10-3620-Thy_vs_Aplan-10th-Exp-NHD13-Donor-plus-Pooled-Tail-Ref	chrX	150646145	150646145	C	G	Tro	c.5824G>C	p.Gly1942Arg	missense_variant	MODERATE	148	0	0.007811	26	16	0.6	6.5699
Aplan-10-3620-Thy_vs_Aplan-10th-Exp-NHD13-Donor-plus-Pooled-Tail-Ref	chrX	152209202	152209202	C	G	Iqsec2	c.1834C>G	p.Arg612Gly	missense_variant	MODERATE	87	1	0.014	19	8	0.416	5.69239
Aplan-10-3620-Thy_vs_Aplan-10th-Exp-NHD13-Donor-plus-Pooled-Tail-Ref	chrX	157568283	157568283	G	C	Yy2	c.486C>G	p.Ala162Ala	synonymous_variant	LOW	249	0	0.00467	50	19	0.386	6.62674
Aplan-10-3621-Thy_vs_Aplan-Pooled-Tail-Ref	chr1	9968889	9968889	G	GT	Ppp1r42	c.1004dupA	p.Asn335fs	frameshift_variant	HIGH	251	0	0.004968	26	9	0.375	6.04261
Aplan-10-3621-Thy_vs_Aplan-Pooled-Tail-Ref	chr11	86355316	86355316	T	C	Med13	c.259A>G	p.Lys87Glu	missense_variant	MODERATE	231	0	0.005223	16	5	0.25	6.22633
Aplan-10-3621-Thy_vs_Aplan-Pooled-Tail-Ref	chr14	75727727	75727727	G	A	Cog3	c.1575C>T	p.Ala525Ala	synonymous_variant	LOW	283	2	0.009114	27	5	0.238	4.18817
Aplan-10-3621-Thy_vs_Aplan-Pooled-Tail-Ref	chr15	57938021	57938021	C	G	Tbc1d31	c.951C>G	p.His317Gln	missense_variant	MODERATE	149	0	0.008547	17	5	0.285	5.20341
Aplan-10-3621-Thy_vs_Aplan-Pooled-Tail-Ref	chr18	36947724	36947724	C	T	Pcdha3	c.1518C>T	p.Ser506Ser	synonymous_variant	LOW	280	0	0.004282	21	7	0.35	6.43203
Aplan-10-3625-Thy_vs_Aplan-Pooled-Tail-Ref	chr1	4348136	4348136	C	G	Rp1	c.2752G>C	p.Gly918Arg	missense_variant	MODERATE	268	0	0.004338	200	61	0.305	5.88812
Aplan-10-3625-Thy_vs_Aplan-Pooled-Tail-Ref	chr1	4492288	4492288	C	G	Sox17	c.688G>C	p.Val230Leu	missense_variant	MODERATE	60	0	0.02	7	5	0.572	5.66265
Aplan-10-3625-Thy_vs_Aplan-Pooled-Tail-Ref	chr1	5916315	5916315	G	C	Npbwr1	c.979C>G	p.Arg327Gly	missense_variant	MODERATE	70	0	0.018	20	7	0.368	4.98399
Aplan-10-3625-Thy_vs_Aplan-Pooled-Tail-Ref	chr1	11065761	11065761	C	A	Prex2	c.190-33C>A		intron_variant	MODIFIER	73	1	0.036	48	37	0.785	6.16287
Aplan-10-3625-Thy_vs_Aplan-Pooled-Tail-Ref	chr1	12836220	12836220	C	G	Sulf1	c.1485C>G	p.Arg495Arg	synonymous_variant	LOW	92	0	0.013	28	8	0.32	5.43192
Aplan-10-3625-Thy_vs_Aplan-Pooled-Tail-Ref	chr1	12872122	12872122	C	G	Slco5a1	c.2299G>C	p.Gly767Arg	missense_variant	MODERATE	95	0	0.012	36	9	0.285	5.39987
Aplan-10-3625-Thy_vs_Aplan-Pooled-Tail-Ref	chr1	31222569	31222569	G	C	Pih1d3	c.-370G>C		upstream_gene_variant	MODIFIER	69	0	0.017	29	7	0.272	3.94762
Aplan-10-3625-Thy_vs_Aplan-Pooled-Tail-Ref	chr1	32519851	32519851	G	C	Gm9839	c.1149C>G	p.Phe383Leu	missense_variant	MODERATE	455	0	0.002519	197	73	0.362	5.93097
Aplan-10-3625-Thy_vs_Aplan-Pooled-Tail-Ref	chr1	34178449	34178449	C	G	Dst	c.4827+3654C>G		intron_variant	MODIFIER	65	0	0.018	36	10	0.325	4.87843
Aplan-10-3625-Thy_vs_Aplan-Pooled-Tail-Ref	chr1	34463182	34463182	G	A	Ptpn18	c.278G>A	p.Arg93Gln	missense_variant&splice_region_variant	MODERATE	142	0	0.008298	57	22	0.378	6.16867
Aplan-10-3625-Thy_vs_Aplan-Pooled-Tail-Ref	chr1	36413010	36413010	C	G	Fer1l5	c.4054+69C>G		intron_variant	MODIFIER	52	0	0.02	31	12	0.333	5.83651
Aplan-10-3625-Thy_vs_Aplan-Pooled-Tail-Ref	chr1	36527746	36527746	C	G	Cnnm3	c.*2516C>G		3_prime_UTR_variant	MODIFIER	165	1	0.008213	50	21	0.405	6.64675
Aplan-10-3625-Thy_vs_Aplan-Pooled-Tail-Ref	chr1	36778984	36778984	C	G	Zap70	c.956-133C>G		intron_variant	MODIFIER	154	1	0.007975	25	14	0.565	6.05015
Aplan-10-3625-Thy_vs_Aplan-Pooled-Tail-Ref	chr1	40547872	40547872	C	G	Il18rap	c.1313C>G	p.Pro438Arg	missense_variant	MODERATE	77	0	0.017	62	25	0.449	6.91227
Aplan-10-3625-Thy_vs_Aplan-Pooled-Tail-Ref	chr1	42663584	42663584	C	G	Pantr1	n.261G>C		non_coding_transcript_exon_variant	MODIFIER	130	0	0.009534	63	12	0.207	6.16854
Aplan-10-3625-Thy_vs_Aplan-Pooled-Tail-Ref	chr1	43141689	43141689	C	G	Fhl2	c.331+9G>C		intron_variant	MODIFIER	194	0	0.006848	80	27	0.339	6.34633
Aplan-10-3625-Thy_vs_Aplan-Pooled-Tail-Ref	chr1	45331643	45331643	C	G	Col3a1	c.1192-35C>G		intron_variant	MODIFIER	102	0	0.01	61	15	0.221	6.92943
Aplan-10-3625-Thy_vs_Aplan-Pooled-Tail-Ref	chr1	46608925	46608925	C	G	Dnah7c	c.3865C>G	p.Arg1289Gly	missense_variant	MODERATE	291	0	0.004103	216	63	0.306	5.96482
Aplan-10-3625-Thy_vs_Aplan-Pooled-Tail-Ref	chr1	53631657	53631657	C	G	Dnah7a	c.1435G>C	p.Val479Leu	missense_variant	MODERATE	315	1	0.00377	219	72	0.3	5.82553
Aplan-10-3625-Thy_vs_Aplan-Pooled-Tail-Ref	chr1	58213103	58213103	G	A	Aox4	c.112+24G>A		intron_variant	MODIFIER	59	1	0.036	27	18	0.654	7.09523
Aplan-10-3625-Thy_vs_Aplan-Pooled-Tail-Ref	chr1	58252126	58252126	C	G	Aox4	c.2402C>G	p.Ala801Gly	missense_variant	MODERATE	126	0	0.011	54	19	0.341	6.47725
Aplan-10-3625-Thy_vs_Aplan-Pooled-Tail-Ref	chr1	58336584	58336584	C	G	Aox2	c.2587-16C>G		intron_variant	MODIFIER	168	0	0.007687	101	32	0.304	6.06829
Aplan-10-3625-Thy_vs_Aplan-Pooled-Tail-Ref	chr1	58904179	58904179	G	C	Trak2	c.2067C>G	p.Ser689Ser	synonymous_variant	LOW	118	0	0.00914	24	5	0.25	4.02292
Aplan-10-3625-Thy_vs_Aplan-Pooled-Tail-Ref	chr1	59144646	59144646	G	C	Mpp4	c.983+8C>G		splice_region_variant&intron_variant	LOW	57	0	0.019	30	10	0.346	5.12437
Aplan-10-3625-Thy_vs_Aplan-Pooled-Tail-Ref	chr1	59541432	59541432	G	C	Gm973	c.473G>C	p.Arg158Pro	missense_variant	MODERATE	63	0	0.018	21	9	0.421	6.09777
Aplan-10-3625-Thy_vs_Aplan-Pooled-Tail-Ref	chr1	59566666	59566666	C	G	Gm973	c.1655C>G	p.Pro552Arg	missense_variant	MODERATE	141	0	0.00895	78	16	0.25	6.08124
Aplan-10-3625-Thy_vs_Aplan-Pooled-Tail-Ref	chr1	59847167	59847167	G	A	Bmpr2	c.962G>A	p.Arg321Gln	missense_variant	MODERATE	210	2	0.018	94	77	0.785	5.71269
Aplan-10-3625-Thy_vs_Aplan-Pooled-Tail-Ref	chr1	59867928	59867928	G	C	Bmpr2	c.2179G>C	p.Ala727Pro	missense_variant	MODERATE	256	2	0.004838	114	41	0.363	5.75791
Aplan-10-3625-Thy_vs_Aplan-Pooled-Tail-Ref	chr1	60010147	60010147	G	C	Ica1l	c.646C>G	p.Arg216Gly	missense_variant	MODERATE	110	0	0.012	67	19	0.284	7.16843
Aplan-10-3625-Thy_vs_Aplan-Pooled-Tail-Ref	chr1	60117505	60117505	C	G	Carf	c.304-7346C>G		intron_variant	MODIFIER	309	0	0.003768	143	41	0.294	6.2825
Aplan-10-3625-Thy_vs_Aplan-Pooled-Tail-Ref	chr1	60136254	60136254	C	G	Carf	c.755-10C>G		intron_variant	MODIFIER	99	0	0.012	58	15	0.28	7.04864
Aplan-10-3625-Thy_vs_Aplan-Pooled-Tail-Ref	chr1	62745412	62745412	C	G	Nrp2	c.719C>G	p.Ser240Trp	missense_variant	MODERATE	147	0	0.008398	98	22	0.222	6.50195
Aplan-10-3625-Thy_vs_Aplan-Pooled-Tail-Ref	chr1	63537001	63537001	G	C	Adam23	c.924+17G>C		intron_variant	MODIFIER	173	0	0.007156	142	26	0.22	6.59145
Aplan-10-3625-Thy_vs_Aplan-Pooled-Tail-Ref	chr1	64607803	64607803	G	C	Mettl21a	c.594C>G	p.Tyr198*	stop_gained	HIGH	313	0	0.003783	154	57	0.376	5.7896
Aplan-10-3625-Thy_vs_Aplan-Pooled-Tail-Ref	chr1	66569937	66569937	G	C	Unc80	c.3784G>C	p.Val1262Leu	missense_variant	MODERATE	141	0	0.009057	48	12	0.244	7.63934
Aplan-10-3625-Thy_vs_Aplan-Pooled-Tail-Ref	chr1	68254623	68254623	G	C	Erbb4	c.2108C>G	p.Thr703Arg	missense_variant	MODERATE	227	0	0.005	102	34	0.344	6.23268
Aplan-10-3625-Thy_vs_Aplan-Pooled-Tail-Ref	chr1	71598476	71598476	G	C	Fn1	c.6155-13C>G		intron_variant	MODIFIER	189	0	0.006544	91	32	0.362	6.71853
Aplan-10-3625-Thy_vs_Aplan-Pooled-Tail-Ref	chr1	72863253	72863253	G	C	Igfbp5	c.574C>G	p.Arg192Gly	missense_variant	MODERATE	59	0	0.021	16	6	0.384	4.40045
Aplan-10-3625-Thy_vs_Aplan-Pooled-Tail-Ref	chr1	74140988	74140988	C	G	Rufy4	c.1401C>G	p.Asp467Glu	missense_variant	MODERATE	77	0	0.017	34	10	0.31	5.59446
Aplan-10-3625-Thy_vs_Aplan-Pooled-Tail-Ref	chr1	74611271	74611271	G	C	Stk36	c.948+13G>C		intron_variant	MODIFIER	107	0	0.01	29	10	0.382	7.32678
Aplan-10-3625-Thy_vs_Aplan-Pooled-Tail-Ref	chr1	75137819	75137819	G	C	Cnppd1	c.511-3C>G		splice_region_variant&intron_variant	LOW	182	0	0.007205	60	16	0.24	7.12971
Aplan-10-3625-Thy_vs_Aplan-Pooled-Tail-Ref	chr1	75139822	75139822	G	C	Cnppd1	c.259C>G	p.Arg87Gly	missense_variant&splice_region_variant	MODERATE	100	0	0.011	56	15	0.255	7.26761
Aplan-10-3625-Thy_vs_Aplan-Pooled-Tail-Ref	chr1	75145229	75145229	G	C	Cnppd1	c.-3745C>G		upstream_gene_variant	MODIFIER	139	0	0.008573	88	24	0.292	6.53599
Aplan-10-3625-Thy_vs_Aplan-Pooled-Tail-Ref	chr1	75219226	75219226	G	C	Tuba4a	c.-31C>G		5_prime_UTR_variant	MODIFIER	161	0	0.007565	54	13	0.282	6.61596
Aplan-10-3625-Thy_vs_Aplan-Pooled-Tail-Ref	chr1	75257358	75257358	G	C	Ptprn	c.1064C>G	p.Pro355Arg	missense_variant	MODERATE	79	0	0.015	20	6	0.263	4.46104
Aplan-10-3625-Thy_vs_Aplan-Pooled-Tail-Ref	chr1	81241332	81241332	G	C	Nyap2	c.1068G>C	p.Pro356Pro	synonymous_variant	LOW	301	0	0.004142	49	10	0.202	7.02757
Aplan-10-3625-Thy_vs_Aplan-Pooled-Tail-Ref	chr1	82493567	82493567	G	C	Col4a4	c.2066C>G	p.Pro689Arg	missense_variant	MODERATE	145	0	0.009338	28	8	0.363	6.73502
Aplan-10-3625-Thy_vs_Aplan-Pooled-Tail-Ref	chr1	84751610	84751610	G	C	Trip12	c.3285C>G	p.Ile1095Met	missense_variant	MODERATE	199	0	0.006251	124	46	0.374	6.01929
Aplan-10-3625-Thy_vs_Aplan-Pooled-Tail-Ref	chr1	86026435	86026435	C	G	Spata3	c.498C>G	p.Cys166Trp	missense_variant	MODERATE	441	0	0.003079	102	35	0.347	5.973
Aplan-10-3625-Thy_vs_Aplan-Pooled-Tail-Ref	chr1	86426441	86426441	C	G	1700019O17Rik	c.71C>G	p.Ser24Trp	missense_variant	MODERATE	94	0	0.013	50	11	0.227	5.39844
Aplan-10-3625-Thy_vs_Aplan-Pooled-Tail-Ref	chr1	87087487	87087487	G	C	Alppl2	c.1239C>G	p.Asn413Lys	missense_variant	MODERATE	186	0	0.006309	80	22	0.224	6.64325
Aplan-10-3625-Thy_vs_Aplan-Pooled-Tail-Ref	chr1	87778970	87778970	C	G	Atg16l1	c.1051C>G	p.Arg351Gly	missense_variant	MODERATE	115	0	0.011	41	13	0.384	6.52655
Aplan-10-3625-Thy_vs_Aplan-Pooled-Tail-Ref	chr1	87926252	87926252	C	G	Dgkd	c.1816C>G	p.Arg606Gly	missense_variant	MODERATE	94	0	0.012	37	16	0.404	6.7005
Aplan-10-3625-Thy_vs_Aplan-Pooled-Tail-Ref	chr1	87934147	87934147	C	G	Dgkd	c.2423C>G	p.Thr808Ser	missense_variant	MODERATE	98	0	0.012	53	14	0.276	6.91444
Aplan-10-3625-Thy_vs_Aplan-Pooled-Tail-Ref	chr1	88319006	88319006	C	G	Trpm8	c.37C>G	p.Arg13Gly	missense_variant	MODERATE	13	0	0.077	13	8	0.5	2.78315
Aplan-10-3625-Thy_vs_Aplan-Pooled-Tail-Ref	chr1	89888694	89888694	G	C	Agap1	c.2374G>C	p.Gly792Arg	missense_variant	MODERATE	77	0	0.016	26	12	0.458	6.403
Aplan-10-3625-Thy_vs_Aplan-Pooled-Tail-Ref	chr1	89928842	89928842	G	C	Gbx2	c.825C>G	p.Thr275Thr	synonymous_variant	LOW	203	0	0.005864	48	15	0.275	6.69438
Aplan-10-3625-Thy_vs_Aplan-Pooled-Tail-Ref	chr1	90942884	90942884	C	G	Mlph	c.1516C>G	p.Arg506Gly	missense_variant	MODERATE	245	0	0.005396	74	14	0.224	6.1532
Aplan-10-3625-Thy_vs_Aplan-Pooled-Tail-Ref	chr1	90958958	90958958	G	C	Rab17	c.571C>G	p.Arg191Gly	missense_variant	MODERATE	109	0	0.011	24	7	0.339	5.55561
Aplan-10-3625-Thy_vs_Aplan-Pooled-Tail-Ref	chr1	91344841	91344841	G	C	Espnl	c.1922G>C	p.Arg641Pro	missense_variant	MODERATE	216	0	0.00541	25	9	0.4	7.44045
Aplan-10-3625-Thy_vs_Aplan-Pooled-Tail-Ref	chr1	91359340	91359340	G	C	Klhl30	c.1347G>C	p.Ala449Ala	synonymous_variant	LOW	116	0	0.011	46	14	0.304	6.66097
Aplan-10-3625-Thy_vs_Aplan-Pooled-Tail-Ref	chr1	92881874	92881874	C	G	Ankmy1	c.1941G>C	p.Pro647Pro	synonymous_variant	LOW	62	0	0.02	19	13	0.612	6.40989
Aplan-10-3625-Thy_vs_Aplan-Pooled-Tail-Ref	chr1	93281626	93281626	G	C	Sned1	c.2486-26G>C		intron_variant	MODIFIER	116	0	0.01	21	11	0.481	6.42237
Aplan-10-3625-Thy_vs_Aplan-Pooled-Tail-Ref	chr1	106023728	106023728	C	G	Zcchc2	c.1792C>G	p.Pro598Ala	missense_variant	MODERATE	127	0	0.009902	72	26	0.377	6.08779
Aplan-10-3625-Thy_vs_Aplan-Pooled-Tail-Ref	chr1	118836308	118836308	G	C	Gli2	c.4112C>G	p.Thr1371Arg	missense_variant	MODERATE	180	0	0.006184	40	8	0.207	6.192
Aplan-10-3625-Thy_vs_Aplan-Pooled-Tail-Ref	chr1	118855654	118855654	G	C	Gli2	c.632-17C>G		intron_variant	MODIFIER	58	0	0.021	16	8	0.467	6.06858
Aplan-10-3625-Thy_vs_Aplan-Pooled-Tail-Ref	chr1	119707739	119707739	G	C	Ptpn4	c.1196+37C>G		intron_variant	MODIFIER	88	0	0.014	48	19	0.389	6.65154
Aplan-10-3625-Thy_vs_Aplan-Pooled-Tail-Ref	chr1	119937313	119937313	G	C	Cfap221	c.1570C>G	p.Arg524Gly	missense_variant	MODERATE	100	0	0.012	33	13	0.444	6.99575
Aplan-10-3625-Thy_vs_Aplan-Pooled-Tail-Ref	chr1	119955649	119955649	G	C	Cfap221	c.791C>G	p.Pro264Arg	missense_variant&splice_region_variant	MODERATE	90	0	0.013	52	17	0.36	6.62494
Aplan-10-3625-Thy_vs_Aplan-Pooled-Tail-Ref	chr1	121561271	121561271	G	C	Ddx18	c.1036+10C>G		intron_variant	MODIFIER	154	0	0.008218	43	17	0.389	6.20538
Aplan-10-3625-Thy_vs_Aplan-Pooled-Tail-Ref	chr1	126258462	126258462	G	C	Nckap5	c.358C>G	p.Arg120Gly	missense_variant	MODERATE	324	0	0.004048	110	37	0.291	6.13881
Aplan-10-3625-Thy_vs_Aplan-Pooled-Tail-Ref	chr1	127365209	127365209	C	G	Mgat5	c.465C>G	p.Cys155Trp	missense_variant	MODERATE	108	0	0.011	97	34	0.338	6.01089
Aplan-10-3625-Thy_vs_Aplan-Pooled-Tail-Ref	chr1	128304263	128304263	C	G	Lct	c.1848G>C	p.Pro616Pro	synonymous_variant	LOW	30	0	0.032	23	8	0.381	3.25712
Aplan-10-3625-Thy_vs_Aplan-Pooled-Tail-Ref	chr1	130933134	130933134	C	G	Il19	c.*14G>C		3_prime_UTR_variant	MODIFIER	84	0	0.014	65	19	0.3	6.05081
Aplan-10-3625-Thy_vs_Aplan-Pooled-Tail-Ref	chr1	131129597	131129597	G	C	Dyrk3	c.838C>G	p.Arg280Gly	missense_variant	MODERATE	175	0	0.006775	72	22	0.338	6.94672
Aplan-10-3625-Thy_vs_Aplan-Pooled-Tail-Ref	chr1	132115475	132115475	G	C	Cdk18	c.1311C>G	p.Phe437Leu	missense_variant	MODERATE	129	0	0.009694	33	9	0.28	6.64141
Aplan-10-3625-Thy_vs_Aplan-Pooled-Tail-Ref	chr1	132518702	132518702	C	G	Cntn2	c.2397G>C	p.Gly799Gly	synonymous_variant	LOW	187	1	0.006564	27	12	0.423	7.3722
Aplan-10-3625-Thy_vs_Aplan-Pooled-Tail-Ref	chr1	133101463	133101464	TC	T	Pik3c2b	c.4277+10delC		intron_variant	MODIFIER	176	12	0.068	21	19	0.844	6.5716
Aplan-10-3625-Thy_vs_Aplan-Pooled-Tail-Ref	chr1	133680653	133680653	G	C	Lax1	c.367-18C>G		intron_variant	MODIFIER	69	1	0.031	65	24	0.354	6.09515
Aplan-10-3625-Thy_vs_Aplan-Pooled-Tail-Ref	chr1	133714026	133714026	G	C	Atp2b4	c.3312+1028C>G		intron_variant	MODIFIER	46	0	0.023	34	8	0.242	3.20319
Aplan-10-3625-Thy_vs_Aplan-Pooled-Tail-Ref	chr1	133738111	133738111	G	C	Atp2b4	c.783C>G	p.His261Gln	missense_variant	MODERATE	141	1	0.008508	53	13	0.244	6.79727
Aplan-10-3625-Thy_vs_Aplan-Pooled-Tail-Ref	chr1	133914453	133914453	C	G	Prelp	c.953G>C	p.Ser318Thr	missense_variant	MODERATE	280	3	0.004903	84	33	0.392	6.63893
Aplan-10-3625-Thy_vs_Aplan-Pooled-Tail-Ref	chr1	134200143	134200143	G	C	Mybph	c.1435+7G>C		splice_region_variant&intron_variant	LOW	100	0	0.01	35	8	0.25	4.97363
Aplan-10-3625-Thy_vs_Aplan-Pooled-Tail-Ref	chr1	134327271	134327271	C	G	Ppfia4	c.845G>C	p.Arg282Pro	missense_variant	MODERATE	47	0	0.022	21	6	0.315	3.30472
Aplan-10-3625-Thy_vs_Aplan-Pooled-Tail-Ref	chr1	134410515	134410515	G	C	Cyb5r1	c.668G>C	p.Arg223Pro	missense_variant	MODERATE	163	0	0.007557	94	29	0.292	5.83842
Aplan-10-3625-Thy_vs_Aplan-Pooled-Tail-Ref	chr1	134423980	134423980	C	G	Adipor1	c.164C>G	p.Pro55Arg	missense_variant	MODERATE	61	0	0.021	57	17	0.333	6.00024
Aplan-10-3625-Thy_vs_Aplan-Pooled-Tail-Ref	chr1	134593440	134593440	C	G	Kdm5b	c.688C>G	p.Arg230Gly	missense_variant	MODERATE	106	0	0.011	41	13	0.345	6.21168
Aplan-10-3625-Thy_vs_Aplan-Pooled-Tail-Ref	chr1	134760435	134760435	G	C	Syt2-Ppp1r12b	n.134760435G>C		intergenic_region	MODIFIER	176	0	0.007309	83	27	0.319	6.50005
Aplan-10-3625-Thy_vs_Aplan-Pooled-Tail-Ref	chr1	136281445	136281445	C	G	Camsap2	c.2326G>C	p.Ala776Pro	missense_variant	MODERATE	291	0	0.003834	82	28	0.324	6.23979
Aplan-10-3625-Thy_vs_Aplan-Pooled-Tail-Ref	chr1	139237086	139237087	CG	C	Crb1	c.3481delC	p.Arg1161fs	frameshift_variant	HIGH	154	2	0.022	65	52	0.784	6.09047
Aplan-10-3625-Thy_vs_Aplan-Pooled-Tail-Ref	chr1	140553053	140553053	G	C	Kcnt2	c.2577G>C	p.Ala859Ala	synonymous_variant	LOW	104	0	0.011	92	20	0.211	7.10165
Aplan-10-3625-Thy_vs_Aplan-Pooled-Tail-Ref	chr1	143745224	143745224	G	C	Glrx2	c.339+1G>C		splice_donor_variant&intron_variant	HIGH	113	0	0.011	50	18	0.383	7.08092
Aplan-10-3625-Thy_vs_Aplan-Pooled-Tail-Ref	chr1	151360847	151360847	C	G	Ivns1abp	c.1242+8C>G		splice_region_variant&intron_variant	LOW	334	0	0.003771	176	37	0.217	6.04884
Aplan-10-3625-Thy_vs_Aplan-Pooled-Tail-Ref	chr1	153152168	153152168	C	G	Lamc2	c.509G>C	p.Arg170Pro	missense_variant	MODERATE	63	0	0.016	61	13	0.245	4.32003
Aplan-10-3625-Thy_vs_Aplan-Pooled-Tail-Ref	chr1	153243364	153243364	C	G	Lamc1	c.2508G>C	p.Ala836Ala	synonymous_variant	LOW	186	0	0.006749	40	8	0.243	6.28698
Aplan-10-3625-Thy_vs_Aplan-Pooled-Tail-Ref	chr1	153437603	153437603	C	T	Shcbp1l	c.1113C>T	p.Ile371Ile	synonymous_variant	LOW	85	0	0.015	68	20	0.3	6.27687
Aplan-10-3625-Thy_vs_Aplan-Pooled-Tail-Ref	chr1	153876207	153876207	C	G	Teddm1b	c.*840C>G		3_prime_UTR_variant	MODIFIER	178	1	0.006638	97	28	0.296	6.42239
Aplan-10-3625-Thy_vs_Aplan-Pooled-Tail-Ref	chr1	155223461	155223461	C	G	Stx6-Xpr1	n.155223461C>G		intergenic_region	MODIFIER	98	0	0.011	17	6	0.4	5.3567
Aplan-10-3625-Thy_vs_Aplan-Pooled-Tail-Ref	chr1	155862771	155862771	G	C	Cep350	c.7325C>G	p.Ser2442Trp	missense_variant	MODERATE	121	0	0.008739	36	10	0.286	6.86701
Aplan-10-3625-Thy_vs_Aplan-Pooled-Tail-Ref	chr1	156441396	156441396	G	C	Soat1	c.583C>G	p.Arg195Gly	missense_variant	MODERATE	84	0	0.014	78	14	0.2	4.73159
Aplan-10-3625-Thy_vs_Aplan-Pooled-Tail-Ref	chr1	156669593	156669593	G	C	Tor3a	c.381C>G	p.Leu127Leu	synonymous_variant	LOW	127	0	0.009734	45	13	0.325	6.4945
Aplan-10-3625-Thy_vs_Aplan-Pooled-Tail-Ref	chr1	158668598	158668598	G	C	Astn1	c.3251-30G>C		intron_variant	MODIFIER	174	0	0.007243	84	26	0.28	6.87992
Aplan-10-3625-Thy_vs_Aplan-Pooled-Tail-Ref	chr1	160118366	160118366	G	C	Tnn	c.2881C>G	p.Arg961Gly	missense_variant	MODERATE	225	0	0.005844	98	29	0.28	6.84017
Aplan-10-3625-Thy_vs_Aplan-Pooled-Tail-Ref	chr1	160125612	160125612	G	C	Tnn	c.1857C>G	p.Ile619Met	missense_variant	MODERATE	109	0	0.01	67	19	0.281	7.12299
Aplan-10-3625-Thy_vs_Aplan-Pooled-Tail-Ref	chr1	160735653	160735653	C	G	Rabgap1l	c.437G>C	p.Arg146Pro	missense_variant	MODERATE	108	0	0.011	63	24	0.368	6.17029
Aplan-10-3625-Thy_vs_Aplan-Pooled-Tail-Ref	chr1	161098367	161098367	C	G	Klhl20	c.1310G>C	p.Arg437Pro	missense_variant	MODERATE	114	0	0.01	45	10	0.225	5.82495
Aplan-10-3625-Thy_vs_Aplan-Pooled-Tail-Ref	chr1	162954336	162954336	G	C	Fmo3	c.1447C>G	p.Arg483Gly	missense_variant	MODERATE	101	0	0.011	44	9	0.236	4.93195
Aplan-10-3625-Thy_vs_Aplan-Pooled-Tail-Ref	chr1	165659336	165659336	G	C	Rcsd1	c.270+37C>G		intron_variant	MODIFIER	122	0	0.01	61	15	0.298	6.11442
Aplan-10-3625-Thy_vs_Aplan-Pooled-Tail-Ref	chr1	166663533	166663533	G	C	Fmo9	c.1375C>G	p.Leu459Val	missense_variant	MODERATE	133	0	0.008379	71	30	0.417	5.91989
Aplan-10-3625-Thy_vs_Aplan-Pooled-Tail-Ref	chr1	167377277	167377277	G	C	Mgst3	c.175C>G	p.Arg59Gly	missense_variant	MODERATE	295	0	0.004272	114	38	0.342	6.49001
Aplan-10-3625-Thy_vs_Aplan-Pooled-Tail-Ref	chr1	170151028	170151028	G	C	Uap1	c.943C>G	p.Arg315Gly	missense_variant	MODERATE	173	0	0.006785	109	38	0.356	5.94059
Aplan-10-3625-Thy_vs_Aplan-Pooled-Tail-Ref	chr1	171402227	171402227	C	G	Arhgap30	c.499C>G	p.Arg167Gly	missense_variant	MODERATE	188	0	0.006608	96	40	0.392	6.07255
Aplan-10-3625-Thy_vs_Aplan-Pooled-Tail-Ref	chr1	171601158	171601158	G	C	Ly9	c.893C>G	p.Ala298Gly	missense_variant	MODERATE	198	0	0.005783	57	18	0.283	6.53942
Aplan-10-3625-Thy_vs_Aplan-Pooled-Tail-Ref	chr1	172012940	172012940	C	G	Vangl2	c.80G>C	p.Arg27Pro	missense_variant	MODERATE	137	0	0.008068	29	12	0.44	6.50224
Aplan-10-3625-Thy_vs_Aplan-Pooled-Tail-Ref	chr1	172054283	172054283	G	C	Nhlh1	c.15C>G	p.Ser5Ser	synonymous_variant	LOW	32	0	0.03	17	6	0.385	3.05305
Aplan-10-3625-Thy_vs_Aplan-Pooled-Tail-Ref	chr1	172318824	172318824	G	C	Igsf8	c.1577G>C	p.Arg526Pro	missense_variant	MODERATE	156	1	0.008029	19	11	0.546	7.30176
Aplan-10-3625-Thy_vs_Aplan-Pooled-Tail-Ref	chr1	172377886	172377886	C	G	Pigm	c.1188C>G	p.Phe396Leu	missense_variant	MODERATE	174	0	0.006494	66	19	0.34	6.93066
Aplan-10-3625-Thy_vs_Aplan-Pooled-Tail-Ref	chr1	172560382	172560382	G	C	Vsig8	c.374G>C	p.Cys125Ser	missense_variant	MODERATE	111	0	0.011	43	8	0.237	4.65298
Aplan-10-3625-Thy_vs_Aplan-Pooled-Tail-Ref	chr1	173749191	173749191	G	C	Ifi204	c.1839+4C>G		splice_region_variant&intron_variant	LOW	253	0	0.004839	131	37	0.308	6.29343
Aplan-10-3625-Thy_vs_Aplan-Pooled-Tail-Ref	chr1	174214141	174214141	G	C	Spta1	c.4076G>C	p.Arg1359Pro	missense_variant	MODERATE	138	0	0.008675	45	13	0.341	6.82153
Aplan-10-3625-Thy_vs_Aplan-Pooled-Tail-Ref	chr1	174694469	174694469	G	C	Fmn2	c.3913G>C	p.Glu1305Gln	missense_variant	MODERATE	316	0	0.003897	98	32	0.301	5.96453
Aplan-10-3625-Thy_vs_Aplan-Pooled-Tail-Ref	chr1	175663649	175663649	G	C	Opn3	c.817C>G	p.Arg273Gly	missense_variant	MODERATE	74	0	0.015	49	12	0.256	5.19284
Aplan-10-3625-Thy_vs_Aplan-Pooled-Tail-Ref	chr1	177991530	177991530	G	C	Gm16432	c.14G>C	p.Arg5Pro	missense_variant	MODERATE	68	0	0.017	23	8	0.409	5.23888
Aplan-10-3625-Thy_vs_Aplan-Pooled-Tail-Ref	chr1	179763600	179763600	G	C	Ahctf1	c.3614C>G	p.Ser1205Cys	missense_variant	MODERATE	100	1	0.024	49	14	0.295	6.32533
Aplan-10-3625-Thy_vs_Aplan-Pooled-Tail-Ref	chr1	180688002	180688002	G	C	Lin9	c.1336G>C	p.Asp446His	missense_variant	MODERATE	92	0	0.013	52	19	0.4	6.40278
Aplan-10-3625-Thy_vs_Aplan-Pooled-Tail-Ref	chr1	180946593	180946593	C	G	Tmem63a	c.14C>G	p.Pro5Arg	missense_variant	MODERATE	182	0	0.006476	48	18	0.406	7.05705
Aplan-10-3625-Thy_vs_Aplan-Pooled-Tail-Ref	chr1	182487698	182487698	C	G	Capn2	c.974+17G>C		intron_variant	MODIFIER	118	0	0.011	41	16	0.378	7.16335
Aplan-10-3625-Thy_vs_Aplan-Pooled-Tail-Ref	chr1	190943961	190943961	C	G	Vash2	c.*6223G>C		downstream_gene_variant	MODIFIER	124	0	0.009323	67	17	0.267	6.75346
Aplan-10-3625-Thy_vs_Aplan-Pooled-Tail-Ref	chr1	191039666	191039666	C	G	Spata45	c.84C>G	p.Arg28Arg	synonymous_variant	LOW	94	0	0.013	51	9	0.222	4.29935
Aplan-10-3625-Thy_vs_Aplan-Pooled-Tail-Ref	chr1	191357820	191357820	C	G	Ppp2r5a	c.736G>C	p.Val246Leu	missense_variant	MODERATE	100	0	0.012	35	11	0.321	7.03044
Aplan-10-3625-Thy_vs_Aplan-Pooled-Tail-Ref	chr1	195168629	195168629	G	C	Cr2	c.59-5042C>G		intron_variant	MODIFIER	210	0	0.005833	147	40	0.283	5.80444
Aplan-10-3625-Thy_vs_Aplan-Pooled-Tail-Ref	chr2	3409296	3409296	C	G	Meig1	c.166G>C	p.Val56Leu	missense_variant	MODERATE	470	0	0.002819	90	33	0.383	5.97711
Aplan-10-3625-Thy_vs_Aplan-Pooled-Tail-Ref	chr2	3443801	3443801	C	G	Dclre1c	c.917+11C>G		intron_variant	MODIFIER	141	0	0.008824	117	38	0.333	5.7386
Aplan-10-3625-Thy_vs_Aplan-Pooled-Tail-Ref	chr2	5138218	5138218	C	G	Ccdc3	c.285C>G	p.Ala95Ala	synonymous_variant	LOW	43	0	0.029	18	6	0.375	3.47582
Aplan-10-3625-Thy_vs_Aplan-Pooled-Tail-Ref	chr2	6206453	6206453	G	C	Echdc3	c.352C>G	p.Arg118Gly	missense_variant	MODERATE	135	0	0.009281	59	20	0.348	6.86016
Aplan-10-3625-Thy_vs_Aplan-Pooled-Tail-Ref	chr2	9874574	9874574	G	C	Gata3	c.590C>G	p.Thr197Arg	missense_variant	MODERATE	225	0	0.005851	47	14	0.293	6.46464
Aplan-10-3625-Thy_vs_Aplan-Pooled-Tail-Ref	chr2	10042514	10042514	G	C	Taf3	c.322C>G	p.Gln108Glu	missense_variant	MODERATE	175	0	0.007188	98	22	0.212	6.25618
Aplan-10-3625-Thy_vs_Aplan-Pooled-Tail-Ref	chr2	11283838	11283838	C	G	Prkcq	c.1601C>G	p.Ala534Gly	missense_variant	MODERATE	117	0	0.01	83	33	0.358	6.43115
Aplan-10-3625-Thy_vs_Aplan-Pooled-Tail-Ref	chr2	11482402	11482402	C	G	Pfkfb3	c.1213+43G>C		intron_variant	MODIFIER	48	0	0.023	27	10	0.375	4.99237
Aplan-10-3625-Thy_vs_Aplan-Pooled-Tail-Ref	chr2	13010307	13010307	C	G	C1ql3	c.541G>C	p.Gly181Arg	missense_variant	MODERATE	72	0	0.016	19	6	0.389	4.39036
Aplan-10-3625-Thy_vs_Aplan-Pooled-Tail-Ref	chr2	13219093	13219093	C	G	Rsu1	c.316G>C	p.Gly106Arg	missense_variant	MODERATE	96	0	0.013	61	13	0.22	5.71337
Aplan-10-3625-Thy_vs_Aplan-Pooled-Tail-Ref	chr2	14968125	14968125	G	C	Cacnb2	c.792+50G>C		intron_variant	MODIFIER	192	0	0.006322	145	38	0.269	6.01784
Aplan-10-3625-Thy_vs_Aplan-Pooled-Tail-Ref	chr2	16712137	16712137	C	G	Plxdc2	c.1184C>G	p.Thr395Arg	missense_variant	MODERATE	54	0	0.025	29	11	0.364	5.66891
Aplan-10-3625-Thy_vs_Aplan-Pooled-Tail-Ref	chr2	18123731	18123731	C	T	Mllt10	c.522C>T	p.Ala174Ala	synonymous_variant	LOW	160	2	0.024	100	70	0.689	5.75503
Aplan-10-3625-Thy_vs_Aplan-Pooled-Tail-Ref	chr2	21213238	21213238	G	A	Thnsl1	c.1802G>A	p.Arg601Gln	missense_variant	MODERATE	171	0	0.007076	93	64	0.678	5.71497
Aplan-10-3625-Thy_vs_Aplan-Pooled-Tail-Ref	chr2	21368582	21368582	G	C	Gpr158	c.327G>C	p.Pro109Pro	synonymous_variant	LOW	125	0	0.00869	36	10	0.31	6.9795
Aplan-10-3625-Thy_vs_Aplan-Pooled-Tail-Ref	chr2	22600132	22600132	C	G	Myo3a-Gad2	n.22600132C>G		intergenic_region	MODIFIER	155	0	0.008488	80	25	0.262	6.07665
Aplan-10-3625-Thy_vs_Aplan-Pooled-Tail-Ref	chr2	24847947	24847947	G	C	Ehmt1	c.1644C>G	p.His548Gln	missense_variant	MODERATE	89	0	0.014	46	10	0.25	4.98502
Aplan-10-3625-Thy_vs_Aplan-Pooled-Tail-Ref	chr2	24926409	24926409	G	C	Arrdc1	c.658C>G	p.Arg220Gly	missense_variant	MODERATE	118	0	0.009849	60	17	0.302	7.10723
Aplan-10-3625-Thy_vs_Aplan-Pooled-Tail-Ref	chr2	25061728	25061728	C	G	Nsmf	c.1558C>G	p.Arg520Gly	missense_variant	MODERATE	144	0	0.007743	45	20	0.45	6.44136
Aplan-10-3625-Thy_vs_Aplan-Pooled-Tail-Ref	chr2	25094771	25094771	C	G	Noxa1	c.154G>C	p.Gly52Arg	missense_variant	MODERATE	131	0	0.009397	37	17	0.437	6.27149
Aplan-10-3625-Thy_vs_Aplan-Pooled-Tail-Ref	chr2	25094873	25094873	C	G	Noxa1	c.52G>C	p.Val18Leu	missense_variant	MODERATE	92	0	0.013	29	13	0.48	7.30675
Aplan-10-3625-Thy_vs_Aplan-Pooled-Tail-Ref	chr2	25290535	25290535	G	C	Lrrc26	c.547G>C	p.Glu183Gln	missense_variant	MODERATE	97	0	0.012	19	7	0.368	5.96632
Aplan-10-3625-Thy_vs_Aplan-Pooled-Tail-Ref	chr2	25397502	25397502	G	C	Entpd2	c.224G>C	p.Cys75Ser	missense_variant	MODERATE	80	0	0.014	42	9	0.243	4.43701
Aplan-10-3625-Thy_vs_Aplan-Pooled-Tail-Ref	chr2	25446768	25446768	C	G	Mir3087	n.*3934C>G		downstream_gene_variant	MODIFIER	93	0	0.012	53	12	0.217	5.66405
Aplan-10-3625-Thy_vs_Aplan-Pooled-Tail-Ref	chr2	25578744	25578744	C	G	Gm996	c.1154G>C	p.Arg385Pro	missense_variant	MODERATE	263	1	0.004667	39	17	0.419	6.15474
Aplan-10-3625-Thy_vs_Aplan-Pooled-Tail-Ref	chr2	25578750	25578750	C	G	Gm996	c.1148G>C	p.Arg383Pro	missense_variant	MODERATE	280	0	0.004252	40	9	0.225	6.5987
Aplan-10-3625-Thy_vs_Aplan-Pooled-Tail-Ref	chr2	25602513	25602513	G	C	Rabl6	c.173C>G	p.Ala58Gly	missense_variant	MODERATE	81	0	0.016	38	10	0.219	5.35231
Aplan-10-3625-Thy_vs_Aplan-Pooled-Tail-Ref	chr2	26009150	26009150	C	G	Ubac1	c.544+11G>C		intron_variant	MODIFIER	165	0	0.007753	145	53	0.345	5.82143
Aplan-10-3625-Thy_vs_Aplan-Pooled-Tail-Ref	chr2	26323601	26323601	C	G	Gpsm1	c.480C>G	p.Cys160Trp	missense_variant	MODERATE	121	0	0.009822	27	10	0.375	6.24781
Aplan-10-3625-Thy_vs_Aplan-Pooled-Tail-Ref	chr2	26415402	26415402	C	G	Sec16a	c.6758-1G>C		splice_acceptor_variant&intron_variant	HIGH	66	0	0.018	39	13	0.4	6.23525
Aplan-10-3625-Thy_vs_Aplan-Pooled-Tail-Ref	chr2	26459499	26459499	G	C	Notch1	c.*32C>G		3_prime_UTR_variant	MODIFIER	87	0	0.014	27	6	0.208	3.9547
Aplan-10-3625-Thy_vs_Aplan-Pooled-Tail-Ref	chr2	26856699	26856699	C	G	Abo	c.14-7709G>C		intron_variant	MODIFIER	120	0	0.01	42	10	0.264	6.24458
Aplan-10-3625-Thy_vs_Aplan-Pooled-Tail-Ref	chr2	27239422	27239422	G	C	Sardh	c.863C>G	p.Pro288Arg	missense_variant	MODERATE	199	0	0.006303	59	18	0.312	6.38652
Aplan-10-3625-Thy_vs_Aplan-Pooled-Tail-Ref	chr2	27525186	27525186	G	C	Wdr5	c.584+25G>C		intron_variant	MODIFIER	234	0	0.005443	142	43	0.293	6.41986
Aplan-10-3625-Thy_vs_Aplan-Pooled-Tail-Ref	chr2	27757819	27757819	G	C	Rxra	c.1209G>C	p.Ala403Ala	synonymous_variant	LOW	84	0	0.015	53	15	0.244	6.79315
Aplan-10-3625-Thy_vs_Aplan-Pooled-Tail-Ref	chr2	27759584	27759584	G	C	Rxra	c.1300G>C	p.Gly434Arg	missense_variant	MODERATE	169	0	0.007381	18	7	0.333	7.64836
Aplan-10-3625-Thy_vs_Aplan-Pooled-Tail-Ref	chr2	28450594	28450594	C	G	Ppp1r26	c.235C>G	p.Arg79Gly	missense_variant	MODERATE	153	0	0.008059	27	8	0.281	7.02178
Aplan-10-3625-Thy_vs_Aplan-Pooled-Tail-Ref	chr2	28452019	28452019	C	G	Ppp1r26	c.1660C>G	p.Arg554Gly	missense_variant	MODERATE	147	0	0.007658	44	12	0.317	6.47876
Aplan-10-3625-Thy_vs_Aplan-Pooled-Tail-Ref	chr2	28497771	28497771	C	G	Gbgt1	c.6C>G	p.Thr2Thr	synonymous_variant	LOW	338	0	0.003979	62	28	0.465	5.95149
Aplan-10-3625-Thy_vs_Aplan-Pooled-Tail-Ref	chr2	28497772	28497772	C	G	Gbgt1	c.7C>G	p.Arg3Gly	missense_variant	MODERATE	338	0	0.003963	62	16	0.255	7.09802
Aplan-10-3625-Thy_vs_Aplan-Pooled-Tail-Ref	chr2	28545092	28545092	C	G	Ralgds	c.1259C>G	p.Ala420Gly	missense_variant	MODERATE	158	0	0.007732	42	13	0.324	6.2068
Aplan-10-3625-Thy_vs_Aplan-Pooled-Tail-Ref	chr2	28693610	28693610	C	G	Tsc1	c.*6437C>G		downstream_gene_variant	MODIFIER	67	0	0.017	50	13	0.263	5.24165
Aplan-10-3625-Thy_vs_Aplan-Pooled-Tail-Ref	chr2	28835247	28835247	G	C	Gtf3c4	c.472C>G	p.Arg158Gly	missense_variant	MODERATE	178	0	0.006392	69	24	0.381	6.24459
Aplan-10-3625-Thy_vs_Aplan-Pooled-Tail-Ref	chr2	29719632	29719632	C	G	Rapgef1	c.2080C>G	p.Pro694Ala	missense_variant	MODERATE	288	0	0.004349	56	16	0.287	6.89448
Aplan-10-3625-Thy_vs_Aplan-Pooled-Tail-Ref	chr2	29763424	29763424	G	C	Gm13547	c.273G>C	p.Pro91Pro	synonymous_variant	LOW	401	0	0.003171	123	39	0.311	6.13423
Aplan-10-3625-Thy_vs_Aplan-Pooled-Tail-Ref	chr2	29958459	29958459	C	G	Gle1	c.2044C>G	p.Arg682Gly	missense_variant	MODERATE	68	0	0.017	73	15	0.209	4.5084
Aplan-10-3625-Thy_vs_Aplan-Pooled-Tail-Ref	chr2	30092434	30092434	C	G	Zdhhc12	c.250G>C	p.Gly84Arg	missense_variant	MODERATE	90	0	0.014	9	6	0.625	7.12514
Aplan-10-3625-Thy_vs_Aplan-Pooled-Tail-Ref	chr2	30307610	30307610	C	G	Nup188	c.675C>G	p.Phe225Leu	missense_variant	MODERATE	109	0	0.011	70	24	0.333	6.63939
Aplan-10-3625-Thy_vs_Aplan-Pooled-Tail-Ref	chr2	30323619	30323619	C	G	Nup188	c.2061C>G	p.Val687Val	synonymous_variant	LOW	101	0	0.012	28	9	0.346	6.47231
Aplan-10-3625-Thy_vs_Aplan-Pooled-Tail-Ref	chr2	30820676	30820676	C	G	Ntmt1	c.390C>G	p.Asp130Glu	missense_variant	MODERATE	153	0	0.007399	23	9	0.428	6.67968
Aplan-10-3625-Thy_vs_Aplan-Pooled-Tail-Ref	chr2	30878560	30878560	G	C	Prrx2	c.398G>C	p.Arg133Pro	missense_variant	MODERATE	87	0	0.015	36	14	0.345	6.67311
Aplan-10-3625-Thy_vs_Aplan-Pooled-Tail-Ref	chr2	31800258	31800258	C	G	Abl1	c.1788C>G	p.Arg596Arg	synonymous_variant	LOW	81	0	0.015	34	9	0.249	5.12733
Aplan-10-3625-Thy_vs_Aplan-Pooled-Tail-Ref	chr2	31801881	31801881	C	G	Abl1	c.3411C>G	p.Ser1137Arg	missense_variant	MODERATE	40	0	0.027	24	6	0.272	2.74588
Aplan-10-3625-Thy_vs_Aplan-Pooled-Tail-Ref	chr2	31833909	31833909	C	G	Fibcd1	c.717G>C	p.Pro239Pro	synonymous_variant	LOW	69	0	0.019	29	11	0.423	6.51035
Aplan-10-3625-Thy_vs_Aplan-Pooled-Tail-Ref	chr2	31994720	31994720	C	G	Nup214	c.1492C>G	p.Pro498Ala	missense_variant	MODERATE	429	0	0.002781	52	11	0.244	7.31509
Aplan-10-3625-Thy_vs_Aplan-Pooled-Tail-Ref	chr2	31996430	31996430	C	G	Nup214	c.1803C>G	p.Ser601Ser	synonymous_variant	LOW	175	0	0.006857	54	18	0.341	6.2574
Aplan-10-3625-Thy_vs_Aplan-Pooled-Tail-Ref	chr2	32258328	32258328	G	C	Uck1	c.475C>G	p.His159Asp	missense_variant	MODERATE	81	0	0.015	58	22	0.391	6.53675
Aplan-10-3625-Thy_vs_Aplan-Pooled-Tail-Ref	chr2	32258339	32258339	C	G	Uck1	c.464G>C	p.Arg155Pro	missense_variant	MODERATE	81	0	0.014	55	19	0.347	6.80208
Aplan-10-3625-Thy_vs_Aplan-Pooled-Tail-Ref	chr2	32335944	32335944	C	G	Dnm1	c.1122G>C	p.Leu374Leu	synonymous_variant	LOW	85	0	0.012	36	8	0.251	4.47325
Aplan-10-3625-Thy_vs_Aplan-Pooled-Tail-Ref	chr2	32338040	32338040	G	C	Dnm1	c.649C>G	p.Arg217Gly	missense_variant	MODERATE	145	0	0.008012	31	8	0.276	6.39148
Aplan-10-3625-Thy_vs_Aplan-Pooled-Tail-Ref	chr2	32563739	32563739	G	C	Fam102a	c.599G>C	p.Arg200Pro	missense_variant	MODERATE	319	0	0.003908	44	9	0.202	6.67824
Aplan-10-3625-Thy_vs_Aplan-Pooled-Tail-Ref	chr2	32778947	32778947	G	C	Cfap157	c.1143C>G	p.His381Gln	missense_variant&splice_region_variant	MODERATE	260	0	0.004719	90	35	0.378	5.99833
Aplan-10-3625-Thy_vs_Aplan-Pooled-Tail-Ref	chr2	32779681	32779681	C	G	Ttc16	c.-4333G>C		upstream_gene_variant	MODIFIER	110	0	0.011	35	8	0.264	5.22835
Aplan-10-3625-Thy_vs_Aplan-Pooled-Tail-Ref	chr2	32973696	32973696	C	G	Slc2a8	c.1333G>C	p.Ala445Pro	missense_variant	MODERATE	41	0	0.029	28	6	0.232	2.5027
Aplan-10-3625-Thy_vs_Aplan-Pooled-Tail-Ref	chr2	33567221	33567221	C	G	Lmx1b	c.599G>C	p.Arg200Pro	missense_variant	MODERATE	116	0	0.01	21	7	0.3	6.12146
Aplan-10-3625-Thy_vs_Aplan-Pooled-Tail-Ref	chr2	33645526	33645526	C	G	C130021I20Rik	n.3678C>G		non_coding_transcript_exon_variant	MODIFIER	79	0	0.013	46	13	0.27	6.17743
Aplan-10-3625-Thy_vs_Aplan-Pooled-Tail-Ref	chr2	34178318	34178318	G	C	Pbx3	c.868C>G	p.Arg290Gly	missense_variant	MODERATE	156	0	0.008527	59	22	0.347	6.44435
Aplan-10-3625-Thy_vs_Aplan-Pooled-Tail-Ref	chr2	34984846	34984846	C	G	Hc	c.4790-13G>C		intron_variant	MODIFIER	201	0	0.005975	78	13	0.212	7.5319
Aplan-10-3625-Thy_vs_Aplan-Pooled-Tail-Ref	chr2	35095863	35095863	C	G	AI182371	c.343G>C	p.Val115Leu	missense_variant	MODERATE	200	0	0.006167	184	64	0.347	6.00693
Aplan-10-3625-Thy_vs_Aplan-Pooled-Tail-Ref	chr2	35376021	35376021	C	G	4930402F06Rik	c.636G>C	p.Thr212Thr	synonymous_variant	LOW	296	0	0.004134	157	48	0.331	6.28791
Aplan-10-3625-Thy_vs_Aplan-Pooled-Tail-Ref	chr2	36479566	36479566	G	C	Olfr341	c.563C>G	p.Ser188Trp	missense_variant	MODERATE	336	0	0.003416	215	91	0.42	6.02569
Aplan-10-3625-Thy_vs_Aplan-Pooled-Tail-Ref	chr2	50288933	50288933	G	C	Mmadhc	c.472C>G	p.Arg158Gly	missense_variant	MODERATE	186	0	0.006881	99	28	0.289	6.12462
Aplan-10-3625-Thy_vs_Aplan-Pooled-Tail-Ref	chr2	51628031	51628031	G	C	Tas2r134	c.521G>C	p.Arg174Pro	missense_variant	MODERATE	233	0	0.004721	128	47	0.352	5.68417
Aplan-10-3625-Thy_vs_Aplan-Pooled-Tail-Ref	chr2	52148848	52148848	G	C	Neb	c.20938C>G	p.Arg6980Gly	missense_variant	MODERATE	130	1	0.00964	79	20	0.294	6.67331
Aplan-10-3625-Thy_vs_Aplan-Pooled-Tail-Ref	chr2	52192499	52192499	C	G	Neb	c.17098G>C	p.Ala5700Pro	missense_variant	MODERATE	198	1	0.006447	149	52	0.383	5.80495
Aplan-10-3625-Thy_vs_Aplan-Pooled-Tail-Ref	chr2	53114216	53114216	G	C	Fmnl2	c.1939G>C	p.Asp647His	missense_variant	MODERATE	66	0	0.016	63	19	0.327	6.0409
Aplan-10-3625-Thy_vs_Aplan-Pooled-Tail-Ref	chr2	53128765	53128765	G	C	Fmnl2	c.3167-1647G>C		intron_variant	MODIFIER	176	0	0.007499	70	25	0.328	6.61378
Aplan-10-3625-Thy_vs_Aplan-Pooled-Tail-Ref	chr2	57111615	57111615	G	C	Nr4a2	c.825C>G	p.Tyr275*	stop_gained	HIGH	126	0	0.009429	31	15	0.5	6.84462
Aplan-10-3625-Thy_vs_Aplan-Pooled-Tail-Ref	chr2	57289886	57289886	G	C	Gpd2	c.144G>C	p.Glu48Asp	missense_variant	MODERATE	90	0	0.013	44	17	0.395	6.16783
Aplan-10-3625-Thy_vs_Aplan-Pooled-Tail-Ref	chr2	57305839	57305839	G	C	Gpd2	c.431G>C	p.Arg144Pro	missense_variant	MODERATE	338	0	0.003996	166	61	0.357	6.1312
Aplan-10-3625-Thy_vs_Aplan-Pooled-Tail-Ref	chr2	58771488	58771488	G	C	Upp2	c.302G>C	p.Arg101Pro	missense_variant	MODERATE	103	0	0.012	65	23	0.346	6.35643
Aplan-10-3625-Thy_vs_Aplan-Pooled-Tail-Ref	chr2	59785343	59785343	G	C	Tanc1	c.693G>C	p.Ser231Ser	synonymous_variant	LOW	57	1	0.021	23	14	0.636	6.54936
Aplan-10-3625-Thy_vs_Aplan-Pooled-Tail-Ref	chr2	59841063	59841063	C	G	Tanc1	c.4019C>G	p.Ser1340Trp	missense_variant	MODERATE	93	0	0.013	24	12	0.524	7.51368
Aplan-10-3625-Thy_vs_Aplan-Pooled-Tail-Ref	chr2	60668409	60668409	G	C	Itgb6	c.472C>G	p.Arg158Gly	missense_variant	MODERATE	112	0	0.011	50	10	0.244	5.40065
Aplan-10-3625-Thy_vs_Aplan-Pooled-Tail-Ref	chr2	60755422	60755422	G	C	Rbms1	c.1170C>G	p.Pro390Pro	synonymous_variant	LOW	247	0	0.005306	67	20	0.302	6.84915
Aplan-10-3625-Thy_vs_Aplan-Pooled-Tail-Ref	chr2	62046579	62046579	G	C	Slc4a10	c.-66G>C		5_prime_UTR_variant	MODIFIER	38	0	0.029	19	6	0.353	3.12628
Aplan-10-3625-Thy_vs_Aplan-Pooled-Tail-Ref	chr2	62610586	62610586	C	G	Ifih1	c.1382G>C	p.Arg461Pro	missense_variant	MODERATE	117	0	0.011	72	25	0.339	6.20574
Aplan-10-3625-Thy_vs_Aplan-Pooled-Tail-Ref	chr2	65497651	65497651	C	G	Scn3a	c.2494G>C	p.Ala832Pro	missense_variant	MODERATE	127	1	0.01	96	43	0.443	6.01581
Aplan-10-3625-Thy_vs_Aplan-Pooled-Tail-Ref	chr2	66546999	66546999	C	G	Gm13629	n.966-92C>G		intron_variant	MODIFIER	168	0	0.007209	72	23	0.342	6.1825
Aplan-10-3625-Thy_vs_Aplan-Pooled-Tail-Ref	chr2	66699818	66699818	A	T	Scn7a	c.2157+25T>A		intron_variant	MODIFIER	91	1	0.026	69	27	0.374	6.00495
Aplan-10-3625-Thy_vs_Aplan-Pooled-Tail-Ref	chr2	67511660	67511660	C	G	Xirp2	c.4244C>G	p.Ser1415Trp	missense_variant	MODERATE	119	1	0.009516	87	29	0.346	5.92803
Aplan-10-3625-Thy_vs_Aplan-Pooled-Tail-Ref	chr2	69323845	69323845	C	G	Abcb11	c.376G>C	p.Gly126Arg	missense_variant	MODERATE	121	0	0.009798	102	25	0.253	6.34021
Aplan-10-3625-Thy_vs_Aplan-Pooled-Tail-Ref	chr2	69505287	69505287	C	G	Lrp2	c.4091G>C	p.Arg1364Pro	missense_variant	MODERATE	180	0	0.006518	103	32	0.304	6.25096
Aplan-10-3625-Thy_vs_Aplan-Pooled-Tail-Ref	chr2	69507765	69507765	G	C	Lrp2	c.3670C>G	p.Pro1224Ala	missense_variant&splice_region_variant	MODERATE	157	1	0.00779	109	21	0.216	6.24164
Aplan-10-3625-Thy_vs_Aplan-Pooled-Tail-Ref	chr2	69670988	69670988	G	C	Klhl41	c.792G>C	p.Pro264Pro	synonymous_variant	LOW	212	0	0.005622	150	69	0.442	5.91022
Aplan-10-3625-Thy_vs_Aplan-Pooled-Tail-Ref	chr2	69772110	69772110	C	G	Ccdc173	c.956G>C	p.Arg319Pro	missense_variant	MODERATE	131	0	0.009283	101	28	0.293	6.04962
Aplan-10-3625-Thy_vs_Aplan-Pooled-Tail-Ref	chr2	70252979	70252979	G	C	Myo3b	c.1975G>C	p.Val659Leu	missense_variant	MODERATE	83	0	0.016	19	5	0.278	3.8551
Aplan-10-3625-Thy_vs_Aplan-Pooled-Tail-Ref	chr2	70597260	70597260	C	G	Gad1	c.1509C>G	p.Phe503Leu	missense_variant	MODERATE	135	0	0.008671	36	13	0.323	6.28294
Aplan-10-3625-Thy_vs_Aplan-Pooled-Tail-Ref	chr2	70965671	70965671	G	C	Mettl8	c.1012C>G	p.Arg338Gly	missense_variant	MODERATE	102	1	0.013	87	35	0.386	5.81317
Aplan-10-3625-Thy_vs_Aplan-Pooled-Tail-Ref	chr2	71137605	71137605	G	C	Cybrd1	c.519G>C	p.Thr173Thr	synonymous_variant	LOW	116	0	0.011	76	16	0.246	6.89852
Aplan-10-3625-Thy_vs_Aplan-Pooled-Tail-Ref	chr2	71247283	71247283	C	G	Dync1i2	c.822-6C>G		splice_region_variant&intron_variant	LOW	158	0	0.007409	106	33	0.335	6.3005
Aplan-10-3625-Thy_vs_Aplan-Pooled-Tail-Ref	chr2	71895781	71895781	G	C	Pdk1	c.1032G>C	p.Thr344Thr	synonymous_variant	LOW	73	0	0.018	27	10	0.384	6.31215
Aplan-10-3625-Thy_vs_Aplan-Pooled-Tail-Ref	chr2	72141097	72141097	G	C	Rapgef4	c.518-56G>C		intron_variant	MODIFIER	278	0	0.004471	68	24	0.345	6.68036
Aplan-10-3625-Thy_vs_Aplan-Pooled-Tail-Ref	chr2	76707219	76707219	C	G	Ttn	c.99126G>C	p.Ala33042Ala	synonymous_variant	LOW	257	0	0.004872	124	34	0.267	5.97928
Aplan-10-3625-Thy_vs_Aplan-Pooled-Tail-Ref	chr2	76726961	76726961	C	G	Ttn	c.84550G>C	p.Asp28184His	missense_variant	MODERATE	135	0	0.008361	84	29	0.34	6.37635
Aplan-10-3625-Thy_vs_Aplan-Pooled-Tail-Ref	chr2	76732011	76732011	C	G	Ttn	c.81251G>C	p.Arg27084Pro	missense_variant	MODERATE	272	0	0.004334	113	29	0.255	6.13364
Aplan-10-3625-Thy_vs_Aplan-Pooled-Tail-Ref	chr2	76776330	76776330	G	C	Ttn	c.48997C>G	p.Arg16333Gly	missense_variant	MODERATE	262	1	0.008758	111	42	0.384	6.38531
Aplan-10-3625-Thy_vs_Aplan-Pooled-Tail-Ref	chr2	76786653	76786653	G	C	Ttn	c.44128C>G	p.Arg14710Gly	missense_variant	MODERATE	144	0	0.007162	90	28	0.325	5.98451
Aplan-10-3625-Thy_vs_Aplan-Pooled-Tail-Ref	chr2	76789463	76789463	G	C	Ttn	c.42622C>G	p.Gln14208Glu	missense_variant	MODERATE	145	0	0.007919	100	31	0.309	6.12377
Aplan-10-3625-Thy_vs_Aplan-Pooled-Tail-Ref	chr2	76800512	76800512	C	G	Ttn	c.37309G>C	p.Glu12437Gln	missense_variant	MODERATE	64	0	0.019	47	19	0.421	6.59018
Aplan-10-3625-Thy_vs_Aplan-Pooled-Tail-Ref	chr2	76808516	76808516	G	C	Ttn	c.36579+4C>G		splice_region_variant&intron_variant	LOW	195	0	0.006034	104	33	0.282	6.1673
Aplan-10-3625-Thy_vs_Aplan-Pooled-Tail-Ref	chr2	76808901	76808901	C	G	Ttn	c.36289G>C	p.Gly12097Arg	missense_variant	MODERATE	196	0	0.005793	80	24	0.287	6.88288
Aplan-10-3625-Thy_vs_Aplan-Pooled-Tail-Ref	chr2	76825586	76825586	G	C	Ttn	c.32725+489C>G		intron_variant	MODIFIER	330	0	0.003725	180	67	0.351	5.75707
Aplan-10-3625-Thy_vs_Aplan-Pooled-Tail-Ref	chr2	76870734	76870734	C	G	Ttn	c.26188G>C	p.Ala8730Pro	missense_variant	MODERATE	202	0	0.005589	120	41	0.369	5.97255
Aplan-10-3625-Thy_vs_Aplan-Pooled-Tail-Ref	chr2	76892915	76892915	G	C	Ttn	c.16788C>G	p.Cys5596Trp	missense_variant	MODERATE	231	0	0.005474	158	43	0.284	6.20487
Aplan-10-3625-Thy_vs_Aplan-Pooled-Tail-Ref	chr2	76945517	76945517	G	C	Ttn	c.5318C>G	p.Ala1773Gly	missense_variant	MODERATE	157	0	0.006808	67	23	0.383	6.25416
Aplan-10-3625-Thy_vs_Aplan-Pooled-Tail-Ref	chr2	77030530	77030530	C	G	Ccdc141	c.2865+37G>C		intron_variant	MODIFIER	62	1	0.036	51	11	0.256	2.97192
Aplan-10-3625-Thy_vs_Aplan-Pooled-Tail-Ref	chr2	77049741	77049741	C	G	Ccdc141	c.1737G>C	p.Gln579His	missense_variant	MODERATE	115	0	0.01	52	18	0.292	6.94182
Aplan-10-3625-Thy_vs_Aplan-Pooled-Tail-Ref	chr2	77206263	77206263	C	G	Sestd1	c.915G>C	p.Ser305Ser	synonymous_variant	LOW	114	0	0.011	50	21	0.447	6.37587
Aplan-10-3625-Thy_vs_Aplan-Pooled-Tail-Ref	chr2	77212406	77212406	C	G	Sestd1	c.803G>C	p.Arg268Pro	missense_variant	MODERATE	120	0	0.011	25	11	0.409	7.40656
Aplan-10-3625-Thy_vs_Aplan-Pooled-Tail-Ref	chr2	80418464	80418464	G	C	Frzb	c.645C>G	p.Ala215Ala	synonymous_variant	LOW	141	1	0.00836	78	26	0.333	6.60245
Aplan-10-3625-Thy_vs_Aplan-Pooled-Tail-Ref	chr2	80837843	80837843	G	C	Nup35-Zfp804a	n.80837843G>C		intergenic_region	MODIFIER	176	0	0.007556	61	21	0.341	6.30037
Aplan-10-3625-Thy_vs_Aplan-Pooled-Tail-Ref	chr2	82992127	82992127	C	G	Zfp804a-Zc3h15	n.82992127C>G		intergenic_region	MODIFIER	183	0	0.005979	163	52	0.321	6.15862
Aplan-10-3625-Thy_vs_Aplan-Pooled-Tail-Ref	chr2	84675457	84675457	G	C	Tmx2	c.389C>G	p.Pro130Arg	missense_variant	MODERATE	195	0	0.006804	93	23	0.256	6.50261
Aplan-10-3625-Thy_vs_Aplan-Pooled-Tail-Ref	chr2	84702336	84702336	G	C	Zdhhc5	c.223C>G	p.Arg75Gly	missense_variant	MODERATE	44	0	0.025	50	17	0.349	5.30081
Aplan-10-3625-Thy_vs_Aplan-Pooled-Tail-Ref	chr2	85137006	85137006	G	C	Aplnr	c.374G>C	p.Arg125Pro	missense_variant	MODERATE	180	0	0.006148	68	34	0.446	6.02308
Aplan-10-3625-Thy_vs_Aplan-Pooled-Tail-Ref	chr2	86228266	86228266	C	G	Olfr1047	c.704G>C	p.Arg235Pro	missense_variant	MODERATE	238	0	0.004925	168	56	0.347	5.80724
Aplan-10-3625-Thy_vs_Aplan-Pooled-Tail-Ref	chr2	86786570	86786570	C	G	Olfr1093	c.839C>G	p.Ser280*	stop_gained	HIGH	196	0	0.006112	181	72	0.393	5.80312
Aplan-10-3625-Thy_vs_Aplan-Pooled-Tail-Ref	chr2	86890826	86890826	C	G	Olfr1097	c.348G>C	p.Ser116Ser	synonymous_variant	LOW	482	1	0.00252	184	70	0.366	5.73144
Aplan-10-3625-Thy_vs_Aplan-Pooled-Tail-Ref	chr2	87645805	87645805	C	G	Olfr1133	c.317G>C	p.Gly106Ala	missense_variant	MODERATE	311	0	0.003861	192	59	0.309	5.88137
Aplan-10-3625-Thy_vs_Aplan-Pooled-Tail-Ref	chr2	89055058	89055058	C	G	Olfr1218	c.367G>C	p.Val123Leu	missense_variant	MODERATE	306	1	0.003822	168	43	0.261	5.89193
Aplan-10-3625-Thy_vs_Aplan-Pooled-Tail-Ref	chr2	90015096	90015096	C	G	Olfr1263	c.165C>G	p.Tyr55*	stop_gained	HIGH	360	0	0.003274	218	78	0.354	5.67086
Aplan-10-3625-Thy_vs_Aplan-Pooled-Tail-Ref	chr2	90776305	90776305	C	G	Fnbp4	c.2485-26C>G		intron_variant	MODIFIER	131	0	0.00893	80	26	0.288	6.59174
Aplan-10-3625-Thy_vs_Aplan-Pooled-Tail-Ref	chr2	91480446	91480446	C	G	Lrp4	c.1831C>G	p.Arg611Gly	missense_variant	MODERATE	54	0	0.021	25	10	0.417	5.64418
Aplan-10-3625-Thy_vs_Aplan-Pooled-Tail-Ref	chr2	91492578	91492578	C	G	Lrp4	c.3406C>G	p.Arg1136Gly	missense_variant	MODERATE	126	0	0.009635	64	22	0.333	7.05583
Aplan-10-3625-Thy_vs_Aplan-Pooled-Tail-Ref	chr2	91596481	91596481	C	G	Ckap5	c.4147C>G	p.Arg1383Gly	missense_variant	MODERATE	192	0	0.006533	130	27	0.214	5.92498
Aplan-10-3625-Thy_vs_Aplan-Pooled-Tail-Ref	chr2	91772420	91772420	C	G	Ambra1	c.748C>G	p.Arg250Gly	missense_variant	MODERATE	293	0	0.004296	51	18	0.349	6.5054
Aplan-10-3625-Thy_vs_Aplan-Pooled-Tail-Ref	chr2	91931083	91931083	C	G	Chrm4	c.*2395C>G		downstream_gene_variant	MODIFIER	106	0	0.011	28	6	0.231	4.27996
Aplan-10-3625-Thy_vs_Aplan-Pooled-Tail-Ref	chr2	93842940	93842940	C	G	Accs	c.471G>C	p.Pro157Pro	synonymous_variant	LOW	118	0	0.01	33	7	0.24	4.85849
Aplan-10-3625-Thy_vs_Aplan-Pooled-Tail-Ref	chr2	94427539	94427539	G	C	Api5	c.364C>G	p.Leu122Val	missense_variant	MODERATE	222	0	0.005673	109	38	0.349	6.36978
Aplan-10-3625-Thy_vs_Aplan-Pooled-Tail-Ref	chr2	97948354	97948354	C	G	Lrrc4c-B230118H07Rik	n.97948354C>G		intergenic_region	MODIFIER	57	0	0.018	18	6	0.372	4.0353
Aplan-10-3625-Thy_vs_Aplan-Pooled-Tail-Ref	chr2	97948537	97948537	C	G	Lrrc4c-B230118H07Rik	n.97948537C>G		intergenic_region	MODIFIER	197	0	0.006249	60	24	0.417	6.62541
Aplan-10-3625-Thy_vs_Aplan-Pooled-Tail-Ref	chr2	103705060	103705060	C	G	Abtb2	c.1571C>G	p.Thr524Arg	missense_variant	MODERATE	122	1	0.011	82	20	0.243	6.14567
Aplan-10-3625-Thy_vs_Aplan-Pooled-Tail-Ref	chr2	103752620	103752620	C	G	Nat10	c.455G>C	p.Arg152Pro	missense_variant	MODERATE	107	0	0.011	44	12	0.211	6.94846
Aplan-10-3625-Thy_vs_Aplan-Pooled-Tail-Ref	chr2	104664923	104664923	G	C	Cstf3	c.*4G>C		3_prime_UTR_variant	MODIFIER	51	0	0.02	29	7	0.259	3.30864
Aplan-10-3625-Thy_vs_Aplan-Pooled-Tail-Ref	chr2	105691526	105691526	G	C	Pax6	c.566-39G>C		intron_variant	MODIFIER	66	0	0.019	38	11	0.303	5.26801
Aplan-10-3625-Thy_vs_Aplan-Pooled-Tail-Ref	chr2	105702786	105702786	G	C	Elp4	c.1213C>G	p.Arg405Gly	missense_variant	MODERATE	66	0	0.019	31	16	0.464	6.12923
Aplan-10-3625-Thy_vs_Aplan-Pooled-Tail-Ref	chr2	105966995	105966995	G	C	Dnajc24	c.416C>G	p.Ser139Trp	missense_variant	MODERATE	79	0	0.015	58	21	0.383	7.28716
Aplan-10-3625-Thy_vs_Aplan-Pooled-Tail-Ref	chr2	106867017	106867017	C	G	Mpped2	c.836C>G	p.Pro279Arg	missense_variant	MODERATE	160	0	0.00809	67	15	0.245	6.81436
Aplan-10-3625-Thy_vs_Aplan-Pooled-Tail-Ref	chr2	109723668	109723668	C	G	Bdnf	c.290C>G	p.Ala97Gly	missense_variant	MODERATE	112	0	0.01	71	21	0.282	6.5333
Aplan-10-3625-Thy_vs_Aplan-Pooled-Tail-Ref	chr2	110007180	110007180	C	G	Lgr4	c.1289C>G	p.Thr430Arg	missense_variant	MODERATE	117	0	0.011	66	21	0.328	6.00539
Aplan-10-3625-Thy_vs_Aplan-Pooled-Tail-Ref	chr2	111484341	111484341	C	G	Olfr1288	c.*4617C>G		downstream_gene_variant	MODIFIER	188	1	0.006469	137	42	0.331	5.83742
Aplan-10-3625-Thy_vs_Aplan-Pooled-Tail-Ref	chr2	112459579	112459579	G	T	Emc7	c.353G>T	p.Arg118Leu	missense_variant&splice_region_variant	MODERATE	192	0	0.006909	103	26	0.256	6.14784
Aplan-10-3625-Thy_vs_Aplan-Pooled-Tail-Ref	chr2	112480424	112480424	C	G	Chrm5	c.346G>C	p.Ala116Pro	missense_variant	MODERATE	119	0	0.009616	82	21	0.27	6.02454
Aplan-10-3625-Thy_vs_Aplan-Pooled-Tail-Ref	chr2	112756296	112756296	G	C	Ryr3	c.8208C>G	p.Pro2736Pro	synonymous_variant	LOW	118	0	0.01	86	36	0.4	6.37997
Aplan-10-3625-Thy_vs_Aplan-Pooled-Tail-Ref	chr2	112922384	112922384	G	C	Ryr3	c.1328+41C>G		intron_variant	MODIFIER	90	0	0.015	33	14	0.406	7.26515
Aplan-10-3625-Thy_vs_Aplan-Pooled-Tail-Ref	chr2	113788820	113788820	G	C	Scg5	c.405C>G	p.Pro135Pro	synonymous_variant	LOW	177	0	0.006954	106	21	0.209	6.58457
Aplan-10-3625-Thy_vs_Aplan-Pooled-Tail-Ref	chr2	114011864	114011864	G	C	Gjd2	c.131C>G	p.Thr44Arg	missense_variant	MODERATE	71	0	0.015	40	9	0.222	4.26669
Aplan-10-3625-Thy_vs_Aplan-Pooled-Tail-Ref	chr2	117305862	117305862	C	G	Rasgrp1	c.242G>C	p.Arg81Pro	missense_variant	MODERATE	72	0	0.017	38	7	0.226	3.40166
Aplan-10-3625-Thy_vs_Aplan-Pooled-Tail-Ref	chr2	118693622	118693622	G	C	Pak6	c.1257G>C	p.Thr419Thr	synonymous_variant	LOW	179	0	0.006564	33	10	0.27	6.76515
Aplan-10-3625-Thy_vs_Aplan-Pooled-Tail-Ref	chr2	119071787	119071787	C	G	Casc5	c.3968C>G	p.Thr1323Ser	missense_variant	MODERATE	130	0	0.009112	78	25	0.31	6.27914
Aplan-10-3625-Thy_vs_Aplan-Pooled-Tail-Ref	chr2	119783898	119783898	G	C	Rpap1	c.17C>G	p.Pro6Arg	missense_variant	MODERATE	114	0	0.009874	24	6	0.26	4.80506
Aplan-10-3625-Thy_vs_Aplan-Pooled-Tail-Ref	chr2	119958332	119958332	C	T	Mga	c.7301C>T	p.Ser2434Phe	missense_variant	MODERATE	97	0	0.013	104	74	0.691	5.96817
Aplan-10-3625-Thy_vs_Aplan-Pooled-Tail-Ref	chr2	120047802	120047802	C	G	Gm28042	n.*4770C>G		downstream_gene_variant	MODIFIER	140	0	0.009174	36	10	0.257	7.37712
Aplan-10-3625-Thy_vs_Aplan-Pooled-Tail-Ref	chr2	120056269	120056269	G	C	Gm28042-Ehd4	n.120056269G>C		intergenic_region	MODIFIER	222	0	0.004759	36	10	0.27	7.15435
Aplan-10-3625-Thy_vs_Aplan-Pooled-Tail-Ref	chr2	120494883	120494883	G	C	Capn3	c.1466G>C	p.Arg489Pro	missense_variant	MODERATE	65	0	0.018	50	17	0.35	6.94738
Aplan-10-3625-Thy_vs_Aplan-Pooled-Tail-Ref	chr2	120615818	120615818	C	G	Haus2	c.257-37C>G		intron_variant	MODIFIER	171	0	0.007538	106	29	0.282	6.21958
Aplan-10-3625-Thy_vs_Aplan-Pooled-Tail-Ref	chr2	121004812	121004812	C	G	Ccndbp1	c.-3698C>G		upstream_gene_variant	MODIFIER	111	0	0.011	78	20	0.271	6.80707
Aplan-10-3625-Thy_vs_Aplan-Pooled-Tail-Ref	chr2	121305481	121305481	G	C	Map1a	c.6777G>C	p.Glu2259Asp	missense_variant	MODERATE	160	0	0.007452	48	21	0.405	6.11706
Aplan-10-3625-Thy_vs_Aplan-Pooled-Tail-Ref	chr2	121585881	121585881	G	C	Frmd5	c.329+25C>G		intron_variant	MODIFIER	45	0	0.027	23	7	0.368	3.59708
Aplan-10-3625-Thy_vs_Aplan-Pooled-Tail-Ref	chr2	121585938	121585938	G	C	Frmd5	c.297C>G	p.Ala99Ala	synonymous_variant	LOW	55	0	0.023	31	9	0.348	4.35813
Aplan-10-3625-Thy_vs_Aplan-Pooled-Tail-Ref	chr2	122597425	122597425	C	G	Gatm	c.1106G>C	p.Arg369Pro	missense_variant	MODERATE	334	0	0.003826	162	55	0.351	6.02258
Aplan-10-3625-Thy_vs_Aplan-Pooled-Tail-Ref	chr2	122598214	122598214	C	G	Gatm	c.979-14G>C		intron_variant	MODIFIER	99	0	0.013	58	20	0.34	6.62543
Aplan-10-3625-Thy_vs_Aplan-Pooled-Tail-Ref	chr2	124653694	124653694	G	C	Sema6d	c.60G>C	p.Ala20Ala	synonymous_variant	LOW	176	0	0.007561	62	18	0.276	6.74396
Aplan-10-3625-Thy_vs_Aplan-Pooled-Tail-Ref	chr2	124660210	124660210	G	C	Sema6d	c.1647-73G>C		intron_variant	MODIFIER	60	0	0.019	41	15	0.363	6.67121
Aplan-10-3625-Thy_vs_Aplan-Pooled-Tail-Ref	chr2	126126939	126126939	C	T	Fam227b	c.214G>A	p.Asp72Asn	missense_variant	MODERATE	117	0	0.011	133	39	0.301	5.89804
Aplan-10-3625-Thy_vs_Aplan-Pooled-Tail-Ref	chr2	126829212	126829212	G	C	Trpm7	c.1849C>G	p.Arg617Gly	missense_variant	MODERATE	102	0	0.01	59	22	0.397	6.44026
Aplan-10-3625-Thy_vs_Aplan-Pooled-Tail-Ref	chr2	127292153	127292153	C	G	Stard7	c.755C>G	p.Ala252Gly	missense_variant&splice_region_variant	MODERATE	295	0	0.004229	97	33	0.334	6.11258
Aplan-10-3625-Thy_vs_Aplan-Pooled-Tail-Ref	chr2	127345411	127345411	G	C	Astl	c.244-39G>C		intron_variant	MODIFIER	115	0	0.01	43	12	0.333	7.33178
Aplan-10-3625-Thy_vs_Aplan-Pooled-Tail-Ref	chr2	127367177	127367177	G	C	Adra2b	c.*2251G>C		3_prime_UTR_variant	MODIFIER	103	0	0.012	78	29	0.39	6.22332
Aplan-10-3625-Thy_vs_Aplan-Pooled-Tail-Ref	chr2	127754036	127754036	C	A	Nphp1	c.1508G>T	p.Arg503Leu	missense_variant	MODERATE	211	0	0.006128	62	19	0.305	7.02559
Aplan-10-3625-Thy_vs_Aplan-Pooled-Tail-Ref	chr2	128424440	128424440	C	G	Gm14005	n.258+4654G>C		intron_variant	MODIFIER	70	0	0.016	44	16	0.351	7.49061
Aplan-10-3625-Thy_vs_Aplan-Pooled-Tail-Ref	chr2	128894938	128894938	C	G	Fbln7	c.950+34C>G		intron_variant	MODIFIER	54	0	0.018	24	8	0.336	4.50352
Aplan-10-3625-Thy_vs_Aplan-Pooled-Tail-Ref	chr2	128997794	128997794	C	G	Zc3h6	c.526C>G	p.Arg176Gly	missense_variant	MODERATE	128	0	0.009463	116	43	0.362	5.94941
Aplan-10-3625-Thy_vs_Aplan-Pooled-Tail-Ref	chr2	129092972	129092972	G	C	Ttl	c.1051G>C	p.Val351Leu	missense_variant	MODERATE	71	0	0.018	48	14	0.308	6.08848
Aplan-10-3625-Thy_vs_Aplan-Pooled-Tail-Ref	chr2	130202152	130202152	A	C	Tmc2	c.305A>C	p.Glu102Ala	missense_variant	MODERATE	56	0	0.022	24	6	0.263	3.34881
Aplan-10-3625-Thy_vs_Aplan-Pooled-Tail-Ref	chr2	130405803	130405803	C	G	1700020A23Rik	c.181C>G	p.Arg61Gly	missense_variant	MODERATE	104	0	0.012	50	10	0.209	5.17418
Aplan-10-3625-Thy_vs_Aplan-Pooled-Tail-Ref	chr2	130438201	130438201	C	G	Vps16	c.345C>G	p.Phe115Leu	missense_variant	MODERATE	171	0	0.006342	50	17	0.379	7.12554
Aplan-10-3625-Thy_vs_Aplan-Pooled-Tail-Ref	chr2	130549502	130549502	C	G	Ptpra	c.2019C>G	p.Tyr673*	stop_gained	HIGH	125	0	0.01	29	16	0.52	6.60908
Aplan-10-3625-Thy_vs_Aplan-Pooled-Tail-Ref	chr2	130576881	130576881	C	G	Oxt	c.327C>G	p.Gly109Gly	synonymous_variant	LOW	155	0	0.008373	25	9	0.368	6.41978
Aplan-10-3625-Thy_vs_Aplan-Pooled-Tail-Ref	chr2	130576885	130576885	C	G	Oxt	c.331C>G	p.Arg111Gly	missense_variant	MODERATE	155	0	0.008333	25	9	0.368	6.41978
Aplan-10-3625-Thy_vs_Aplan-Pooled-Tail-Ref	chr2	130637277	130637277	C	G	Lzts3	c.215G>C	p.Ser72Thr	missense_variant	MODERATE	100	0	0.012	32	11	0.361	7.42853
Aplan-10-3625-Thy_vs_Aplan-Pooled-Tail-Ref	chr2	130637301	130637301	C	G	Lzts3	c.191G>C	p.Arg64Pro	missense_variant	MODERATE	89	0	0.013	29	10	0.37	6.68712
Aplan-10-3625-Thy_vs_Aplan-Pooled-Tail-Ref	chr2	130719997	130719997	C	G	4930402H24Rik	c.2654-22G>C		intron_variant	MODIFIER	111	0	0.011	55	16	0.295	6.74638
Aplan-10-3625-Thy_vs_Aplan-Pooled-Tail-Ref	chr2	131083475	131083475	C	G	Siglec1	c.1065G>C	p.Thr355Thr	synonymous_variant	LOW	211	0	0.006076	55	10	0.222	7.14859
Aplan-10-3625-Thy_vs_Aplan-Pooled-Tail-Ref	chr2	131138484	131138484	C	G	Hspa12b	c.322C>G	p.Leu108Val	missense_variant	MODERATE	100	0	0.012	82	23	0.288	6.46061
Aplan-10-3625-Thy_vs_Aplan-Pooled-Tail-Ref	chr2	131138529	131138529	C	G	Hspa12b	c.367C>G	p.Arg123Gly	missense_variant	MODERATE	99	0	0.012	70	23	0.379	6.85631
Aplan-10-3625-Thy_vs_Aplan-Pooled-Tail-Ref	chr2	132065418	132065418	G	C	Slc23a2	c.1296C>G	p.Thr432Thr	synonymous_variant	LOW	96	0	0.012	73	25	0.324	6.02458
Aplan-10-3625-Thy_vs_Aplan-Pooled-Tail-Ref	chr2	132924969	132924969	G	C	Fermt1	c.1077C>G	p.Ala359Ala	synonymous_variant	LOW	290	0	0.004437	73	15	0.2	6.26442
Aplan-10-3625-Thy_vs_Aplan-Pooled-Tail-Ref	chr2	136058942	136058942	G	C	Lamp5	c.65-4G>C		splice_region_variant&intron_variant	LOW	93	0	0.013	55	24	0.467	6.23577
Aplan-10-3625-Thy_vs_Aplan-Pooled-Tail-Ref	chr2	143801190	143801190	G	C	Pcsk2	c.1386G>C	p.Pro462Pro	synonymous_variant	LOW	114	0	0.01	45	10	0.237	5.82495
Aplan-10-3625-Thy_vs_Aplan-Pooled-Tail-Ref	chr2	143831891	143831891	G	C	Bfsp1	c.896C>G	p.Thr299Arg	missense_variant	MODERATE	86	0	0.013	29	8	0.32	5.13927
Aplan-10-3625-Thy_vs_Aplan-Pooled-Tail-Ref	chr2	144585780	144585780	G	C	Sec23b	c.1905+21G>C		intron_variant	MODIFIER	133	0	0.009428	50	14	0.32	6.82998
Aplan-10-3625-Thy_vs_Aplan-Pooled-Tail-Ref	chr2	145879013	145879013	C	G	Rin2	c.2092+38C>G		intron_variant	MODIFIER	81	0	0.014	34	5	0.207	2.7416
Aplan-10-3625-Thy_vs_Aplan-Pooled-Tail-Ref	chr2	145903300	145903300	C	G	Naa20	c.-10C>G		5_prime_UTR_variant	MODIFIER	51	0	0.027	16	9	0.533	6.57259
Aplan-10-3625-Thy_vs_Aplan-Pooled-Tail-Ref	chr2	148698196	148698196	G	C	Napb	c.773C>G	p.Ala258Gly	missense_variant	MODERATE	230	0	0.005591	132	55	0.421	5.89757
Aplan-10-3625-Thy_vs_Aplan-Pooled-Tail-Ref	chr2	148789577	148789577	C	G	Cst12	c.217C>G	p.Arg73Gly	missense_variant	MODERATE	88	0	0.013	62	12	0.223	4.9021
Aplan-10-3625-Thy_vs_Aplan-Pooled-Tail-Ref	chr2	150958851	150958851	C	G	Ninl	c.1493G>C	p.Arg498Pro	missense_variant	MODERATE	219	0	0.005545	65	21	0.295	5.97117
Aplan-10-3625-Thy_vs_Aplan-Pooled-Tail-Ref	chr2	152917534	152917534	C	G	Mylk2	c.1143C>G	p.Gly381Gly	synonymous_variant	LOW	140	0	0.008542	52	20	0.396	6.60662
Aplan-10-3625-Thy_vs_Aplan-Pooled-Tail-Ref	chr2	152919128	152919128	C	G	Mylk2	c.1276-21C>G		intron_variant	MODIFIER	198	0	0.006257	40	13	0.353	7.29164
Aplan-10-3625-Thy_vs_Aplan-Pooled-Tail-Ref	chr2	153070817	153070817	C	G	Ccm2l	c.283-5C>G		splice_region_variant&intron_variant	LOW	115	0	0.009294	25	6	0.259	4.72406
Aplan-10-3625-Thy_vs_Aplan-Pooled-Tail-Ref	chr2	153079510	153079510	C	G	Ccm2l	c.1305C>G	p.Thr435Thr	synonymous_variant	LOW	108	0	0.011	20	7	0.353	6.08614
Aplan-10-3625-Thy_vs_Aplan-Pooled-Tail-Ref	chr2	153393404	153393404	C	G	Asxl1	c.621C>G	p.Ser207Arg	missense_variant	MODERATE	74	0	0.016	36	11	0.314	5.85102
Aplan-10-3625-Thy_vs_Aplan-Pooled-Tail-Ref	chr2	153393621	153393621	C	G	Asxl1	c.719-3C>G		splice_region_variant&intron_variant	LOW	147	0	0.00774	55	19	0.348	7.12809
Aplan-10-3625-Thy_vs_Aplan-Pooled-Tail-Ref	chr2	155407369	155407369	C	G	Ncoa6	c.4014G>C	p.Ser1338Ser	synonymous_variant	LOW	365	0	0.003417	174	64	0.36	5.82197
Aplan-10-3625-Thy_vs_Aplan-Pooled-Tail-Ref	chr2	155503498	155503498	C	G	Ggt7	c.676-19G>C		intron_variant	MODIFIER	77	1	0.016	32	8	0.277	3.70654
Aplan-10-3625-Thy_vs_Aplan-Pooled-Tail-Ref	chr2	155615464	155615464	C	G	Myh7b	c.591C>G	p.Val197Val	synonymous_variant	LOW	219	0	0.005997	65	26	0.398	6.86718
Aplan-10-3625-Thy_vs_Aplan-Pooled-Tail-Ref	chr2	155941710	155941710	C	G	Gdf5	c.1321G>C	p.Ala441Pro	missense_variant	MODERATE	96	0	0.012	47	14	0.25	7.41522
Aplan-10-3625-Thy_vs_Aplan-Pooled-Tail-Ref	chr2	156948289	156948289	G	C	Ndrg3	c.273C>G	p.His91Gln	missense_variant	MODERATE	64	0	0.021	44	9	0.257	3.74173
Aplan-10-3625-Thy_vs_Aplan-Pooled-Tail-Ref	chr2	157325699	157325699	G	C	Ghrh	c.*3898C>G		downstream_gene_variant	MODIFIER	162	0	0.008305	97	32	0.338	6.1187
Aplan-10-3625-Thy_vs_Aplan-Pooled-Tail-Ref	chr2	157469272	157469272	C	G	Src	c.1279C>G	p.Arg427Gly	missense_variant	MODERATE	151	0	0.007987	48	10	0.244	6.51333
Aplan-10-3625-Thy_vs_Aplan-Pooled-Tail-Ref	chr2	157997123	157997123	C	G	Tti1	c.2591G>C	p.Arg864Pro	missense_variant	MODERATE	51	0	0.022	27	6	0.24	2.93838
Aplan-10-3625-Thy_vs_Aplan-Pooled-Tail-Ref	chr2	158124242	158124242	G	C	Tgm2	c.1491C>G	p.Asn497Lys	missense_variant	MODERATE	68	0	0.016	25	9	0.318	5.67284
Aplan-10-3625-Thy_vs_Aplan-Pooled-Tail-Ref	chr2	158309671	158309671	G	C	Lbp	c.310G>C	p.Ala104Pro	missense_variant	MODERATE	125	0	0.009928	41	8	0.235	5.10074
Aplan-10-3625-Thy_vs_Aplan-Pooled-Tail-Ref	chr2	160754418	160754418	C	G	Plcg1	c.1933C>G	p.Arg645Gly	missense_variant	MODERATE	162	0	0.007226	67	30	0.448	6.11264
Aplan-10-3625-Thy_vs_Aplan-Pooled-Tail-Ref	chr2	160780341	160780341	C	G	Zhx3	c.1905G>C	p.Glu635Asp	missense_variant	MODERATE	278	1	0.004299	122	41	0.366	6.3874
Aplan-10-3625-Thy_vs_Aplan-Pooled-Tail-Ref	chr2	163068126	163068126	C	G	Mybl2	c.501-30C>G		intron_variant	MODIFIER	65	0	0.018	17	6	0.352	4.45169
Aplan-10-3625-Thy_vs_Aplan-Pooled-Tail-Ref	chr2	163083235	163083235	C	G	Mybl2	c.2056C>G	p.Arg686Gly	missense_variant	MODERATE	75	0	0.017	37	15	0.433	6.52613
Aplan-10-3625-Thy_vs_Aplan-Pooled-Tail-Ref	chr2	163087307	163087307	C	G	Gtsf1l	c.255G>C	p.Pro85Pro	synonymous_variant	LOW	213	0	0.005312	67	27	0.398	6.13006
Aplan-10-3625-Thy_vs_Aplan-Pooled-Tail-Ref	chr2	163397493	163397493	C	G	Jph2	c.34G>C	p.Gly12Arg	missense_variant	MODERATE	121	0	0.009311	16	5	0.269	4.93209
Aplan-10-3625-Thy_vs_Aplan-Pooled-Tail-Ref	chr2	164086501	164086501	C	G	Stk4	c.252C>G	p.His84Gln	missense_variant	MODERATE	207	0	0.006182	129	39	0.314	6.07354
Aplan-10-3625-Thy_vs_Aplan-Pooled-Tail-Ref	chr2	164486089	164486089	C	G	Dbndd2	c.-2161C>G		upstream_gene_variant	MODIFIER	68	0	0.019	14	6	0.5	5.06671
Aplan-10-3625-Thy_vs_Aplan-Pooled-Tail-Ref	chr2	164507539	164507539	C	G	Pigt	c.*12C>G		3_prime_UTR_variant	MODIFIER	46	0	0.024	31	12	0.411	5.41566
Aplan-10-3625-Thy_vs_Aplan-Pooled-Tail-Ref	chr2	164777284	164777284	C	G	Tnnc2	c.*18G>C		3_prime_UTR_variant	MODIFIER	193	0	0.00621	73	18	0.274	6.3268
Aplan-10-3625-Thy_vs_Aplan-Pooled-Tail-Ref	chr2	165070787	165070787	C	G	Cd40	c.744C>G	p.Thr248Thr	synonymous_variant	LOW	52	0	0.024	41	20	0.457	6.91314
Aplan-10-3625-Thy_vs_Aplan-Pooled-Tail-Ref	chr2	165143713	165143713	C	G	Cdh22	c.952G>C	p.Gly318Arg	missense_variant	MODERATE	141	0	0.008976	39	11	0.324	6.11094
Aplan-10-3625-Thy_vs_Aplan-Pooled-Tail-Ref	chr2	166963432	166963432	C	G	Stau1	c.243G>C	p.Leu81Phe	missense_variant	MODERATE	145	0	0.008397	55	14	0.271	6.73982
Aplan-10-3625-Thy_vs_Aplan-Pooled-Tail-Ref	chr2	167539040	167539040	G	C	Snai1	c.452G>C	p.Arg151Pro	missense_variant	MODERATE	70	0	0.016	22	7	0.375	4.7107
Aplan-10-3625-Thy_vs_Aplan-Pooled-Tail-Ref	chr2	170285875	170285875	C	G	Zfp217-Bcas1	n.170285875C>G		intergenic_region	MODIFIER	84	0	0.013	45	12	0.283	5.95884
Aplan-10-3625-Thy_vs_Aplan-Pooled-Tail-Ref	chr2	170841385	170841385	G	C	Dok5	c.600-35G>C		intron_variant	MODIFIER	50	0	0.024	31	7	0.261	3.12135
Aplan-10-3625-Thy_vs_Aplan-Pooled-Tail-Ref	chr2	172376155	172376155	C	G	Cstf1	c.551C>G	p.Thr184Arg	missense_variant	MODERATE	62	0	0.018	52	25	0.442	6.2274
Aplan-10-3625-Thy_vs_Aplan-Pooled-Tail-Ref	chr2	174657774	174657774	G	C	Zfp831	c.3884G>C	p.Arg1295Pro	missense_variant	MODERATE	51	0	0.023	34	9	0.3	3.89486
Aplan-10-3625-Thy_vs_Aplan-Pooled-Tail-Ref	chr2	174657835	174657835	C	G	Zfp831	c.3919+26C>G		intron_variant	MODIFIER	40	0	0.03	29	10	0.36	4.22984
Aplan-10-3625-Thy_vs_Aplan-Pooled-Tail-Ref	chr2	177893085	177893085	G	C	Gm14327	n.-4078G>C		upstream_gene_variant	MODIFIER	114	0	0.009844	60	15	0.259	7.4962
Aplan-10-3625-Thy_vs_Aplan-Pooled-Tail-Ref	chr2	178260211	178260211	G	A	Phactr3	c.314G>A	p.Arg105Gln	missense_variant	MODERATE	36	0	0.031	30	7	0.25	2.58268
Aplan-10-3625-Thy_vs_Aplan-Pooled-Tail-Ref	chr2	178377593	178377593	C	G	Sycp2	c.1763+46G>C		intron_variant	MODIFIER	179	0	0.007138	101	36	0.357	5.98386
Aplan-10-3625-Thy_vs_Aplan-Pooled-Tail-Ref	chr2	180603432	180603432	C	G	Col9a3	c.411+22C>G		intron_variant	MODIFIER	46	0	0.024	26	7	0.24	3.35014
Aplan-10-3625-Thy_vs_Aplan-Pooled-Tail-Ref	chr2	181029275	181029275	G	C	Chrna4	c.687C>G	p.Ala229Ala	synonymous_variant	LOW	106	0	0.011	59	17	0.3	6.69982
Aplan-10-3625-Thy_vs_Aplan-Pooled-Tail-Ref	chr2	181804926	181804926	G	C	Myt1	c.1764-1G>C		splice_acceptor_variant&intron_variant	HIGH	107	0	0.012	34	7	0.259	4.54565
Aplan-10-3625-Thy_vs_Aplan-Pooled-Tail-Ref	chr3	5242063	5242063	C	G	Zfhx4	c.348C>G	p.Ser116Arg	missense_variant	MODERATE	278	0	0.004261	93	30	0.329	6.23921
Aplan-10-3625-Thy_vs_Aplan-Pooled-Tail-Ref	chr3	10088243	10088243	G	C	Gm9833	n.-34G>C		upstream_gene_variant	MODIFIER	105	0	0.009786	18	6	0.349	5.35966
Aplan-10-3625-Thy_vs_Aplan-Pooled-Tail-Ref	chr3	10089355	10089355	G	C	Gm9833	n.1079G>C		non_coding_transcript_exon_variant	MODIFIER	435	1	0.002647	189	62	0.338	6.05951
Aplan-10-3625-Thy_vs_Aplan-Pooled-Tail-Ref	chr3	14107225	14107225	C	G	Ralyl	c.372C>G	p.Tyr124*	stop_gained	HIGH	224	0	0.006108	181	65	0.331	5.91612
Aplan-10-3625-Thy_vs_Aplan-Pooled-Tail-Ref	chr3	15963716	15963716	C	G	Gm5150	c.431-41G>C		intron_variant	MODIFIER	363	0	0.003542	127	43	0.336	6.28583
Aplan-10-3625-Thy_vs_Aplan-Pooled-Tail-Ref	chr3	18097695	18097695	G	C	Cyp7b1	c.353C>G	p.Ala118Gly	missense_variant	MODERATE	157	0	0.007512	91	22	0.284	6.11983
Aplan-10-3625-Thy_vs_Aplan-Pooled-Tail-Ref	chr3	22216391	22216391	G	T	Tbl1xr1	c.*5964G>T		3_prime_UTR_variant	MODIFIER	93	0	0.012	74	29	0.383	6.2247
Aplan-10-3625-Thy_vs_Aplan-Pooled-Tail-Ref	chr3	28078385	28078385	C	G	Pld1	c.1721C>G	p.Ala574Gly	missense_variant	MODERATE	105	0	0.011	50	13	0.244	6.9053
Aplan-10-3625-Thy_vs_Aplan-Pooled-Tail-Ref	chr3	29648296	29648296	C	G	Egfem1	c.693C>G	p.His231Gln	missense_variant	MODERATE	72	1	0.017	22	8	0.318	4.65536
Aplan-10-3625-Thy_vs_Aplan-Pooled-Tail-Ref	chr3	30643323	30643323	G	C	Lrrc34	c.258C>G	p.Ile86Met	missense_variant	MODERATE	151	0	0.008166	95	27	0.308	6.04672
Aplan-10-3625-Thy_vs_Aplan-Pooled-Tail-Ref	chr3	37320668	37320668	G	C	Bbs12	c.1609G>C	p.Gly537Arg	missense_variant	MODERATE	246	1	0.007884	133	44	0.348	5.90758
Aplan-10-3625-Thy_vs_Aplan-Pooled-Tail-Ref	chr3	37959627	37959627	G	C	Gm20755	n.218+24183G>C		intron_variant	MODIFIER	384	1	0.003155	153	59	0.383	5.90611
Aplan-10-3625-Thy_vs_Aplan-Pooled-Tail-Ref	chr3	48609113	48609113	C	G	1700018B24Rik	n.-13G>C		upstream_gene_variant	MODIFIER	103	0	0.011	23	11	0.43	7.23161
Aplan-10-3625-Thy_vs_Aplan-Pooled-Tail-Ref	chr3	51250119	51250119	C	G	Noct	c.877C>G	p.Arg293Gly	missense_variant	MODERATE	90	0	0.013	54	20	0.333	6.57283
Aplan-10-3625-Thy_vs_Aplan-Pooled-Tail-Ref	chr3	53516550	53516550	G	C	Frem2	c.9465C>G	p.Asn3155Lys	missense_variant	MODERATE	130	0	0.009348	28	8	0.36	6.41303
Aplan-10-3625-Thy_vs_Aplan-Pooled-Tail-Ref	chr3	53585636	53585636	C	G	Frem2	c.5458G>C	p.Gly1820Arg	missense_variant	MODERATE	180	1	0.007291	42	13	0.335	6.09591
Aplan-10-3625-Thy_vs_Aplan-Pooled-Tail-Ref	chr3	54194880	54194880	C	G	Trpc4	c.198C>G	p.Ile66Met	missense_variant	MODERATE	179	0	0.006805	70	20	0.298	6.15468
Aplan-10-3625-Thy_vs_Aplan-Pooled-Tail-Ref	chr3	54266124	54266124	G	C	Trpc4	c.938G>C	p.Arg313Pro	missense_variant	MODERATE	156	0	0.007047	48	17	0.372	6.91956
Aplan-10-3625-Thy_vs_Aplan-Pooled-Tail-Ref	chr3	54372131	54372131	C	G	Postn	c.1029C>G	p.Asn343Lys	missense_variant	MODERATE	84	0	0.015	53	20	0.347	6.34327
Aplan-10-3625-Thy_vs_Aplan-Pooled-Tail-Ref	chr3	55642800	55642800	C	G	Nbea	c.8206G>C	p.Ala2736Pro	missense_variant	MODERATE	158	0	0.007748	42	12	0.288	6.94868
Aplan-10-3625-Thy_vs_Aplan-Pooled-Tail-Ref	chr3	62339926	62339926	C	G	Arhgef26	c.430C>G	p.Arg144Gly	missense_variant	MODERATE	162	0	0.007454	19	8	0.421	6.47193
Aplan-10-3625-Thy_vs_Aplan-Pooled-Tail-Ref	chr3	62530627	62530627	C	G	Gpr149	c.2108G>C	p.Arg703Pro	missense_variant	MODERATE	368	0	0.003409	76	25	0.328	6.14859
Aplan-10-3625-Thy_vs_Aplan-Pooled-Tail-Ref	chr3	62603724	62603724	C	T	Gpr149	c.853G>A	p.Gly285Ser	missense_variant	MODERATE	65	0	0.017	16	7	0.437	5.48281
Aplan-10-3625-Thy_vs_Aplan-Pooled-Tail-Ref	chr3	63347087	63347087	C	T	Mme	c.1417-50C>T		intron_variant	MODIFIER	115	0	0.01	115	36	0.319	6.56534
Aplan-10-3625-Thy_vs_Aplan-Pooled-Tail-Ref	chr3	64559815	64559815	G	C	Vmn2r6	c.-6C>G		5_prime_UTR_variant	MODIFIER	428	0	0.002819	192	37	0.211	5.95291
Aplan-10-3625-Thy_vs_Aplan-Pooled-Tail-Ref	chr3	67435577	67435577	C	G	Gfm1	c.443C>G	p.Ala148Gly	missense_variant	MODERATE	87	0	0.013	45	19	0.392	6.98364
Aplan-10-3625-Thy_vs_Aplan-Pooled-Tail-Ref	chr3	68695429	68695429	C	G	Il12a	c.412-8C>G		splice_region_variant&intron_variant	LOW	230	0	0.004895	88	30	0.332	6.35494
Aplan-10-3625-Thy_vs_Aplan-Pooled-Tail-Ref	chr3	72888999	72888999	G	T	Sis	c.5448C>A	p.Ser1816Arg	missense_variant	MODERATE	154	1	0.008183	90	24	0.295	6.32153
Aplan-10-3625-Thy_vs_Aplan-Pooled-Tail-Ref	chr3	72928632	72928632	C	G	Sis	c.2623G>C	p.Ala875Pro	missense_variant	MODERATE	163	0	0.007612	112	30	0.275	6.22565
Aplan-10-3625-Thy_vs_Aplan-Pooled-Tail-Ref	chr3	73050759	73050759	C	G	Slitrk3	c.679G>C	p.Glu227Gln	missense_variant	MODERATE	207	0	0.00553	103	33	0.319	5.7753
Aplan-10-3625-Thy_vs_Aplan-Pooled-Tail-Ref	chr3	76620405	76620405	G	A	Fstl5	c.1313-75G>A		intron_variant	MODIFIER	104	2	0.024	60	51	0.843	6.13328
Aplan-10-3625-Thy_vs_Aplan-Pooled-Tail-Ref	chr3	80710856	80710856	C	G	Gria2	c.883-12G>C		intron_variant	MODIFIER	50	0	0.021	33	12	0.344	5.4361
Aplan-10-3625-Thy_vs_Aplan-Pooled-Tail-Ref	chr3	83769405	83769405	C	G	Sfrp2	c.582C>G	p.Phe194Leu	missense_variant&splice_region_variant	MODERATE	165	0	0.007649	105	37	0.349	5.67795
Aplan-10-3625-Thy_vs_Aplan-Pooled-Tail-Ref	chr3	84977376	84977376	G	C	Fbxw7	c.1968G>C	p.Thr656Thr	synonymous_variant	LOW	186	0	0.006482	71	27	0.362	6.88694
Aplan-10-3625-Thy_vs_Aplan-Pooled-Tail-Ref	chr3	87711541	87711541	C	T	Arhgef11	c.1281C>T	p.Ile427Ile	splice_region_variant&synonymous_variant	LOW	178	0	0.007314	58	21	0.386	6.64213
Aplan-10-3625-Thy_vs_Aplan-Pooled-Tail-Ref	chr3	87780152	87780152	G	C	Ntrk1	c.1974C>G	p.Asn658Lys	missense_variant	MODERATE	63	0	0.017	42	9	0.243	3.82862
Aplan-10-3625-Thy_vs_Aplan-Pooled-Tail-Ref	chr3	87800844	87800844	G	C	Insrr	c.592G>C	p.Gly198Arg	missense_variant	MODERATE	94	0	0.012	41	10	0.27	5.54565
Aplan-10-3625-Thy_vs_Aplan-Pooled-Tail-Ref	chr3	87811603	87811603	C	G	Insrr	c.2865C>G	p.Ser955Ser	synonymous_variant	LOW	97	0	0.013	32	11	0.379	7.31426
Aplan-10-3625-Thy_vs_Aplan-Pooled-Tail-Ref	chr3	88247827	88247827	C	G	Rhbg	c.376G>C	p.Ala126Pro	missense_variant	MODERATE	41	0	0.028	26	10	0.375	4.66921
Aplan-10-3625-Thy_vs_Aplan-Pooled-Tail-Ref	chr3	88420961	88420961	G	C	Slc25a44	c.222C>G	p.His74Gln	missense_variant	MODERATE	118	0	0.009294	46	11	0.244	6.48809
Aplan-10-3625-Thy_vs_Aplan-Pooled-Tail-Ref	chr3	88900127	88900127	C	G	Gon4l	c.5178C>G	p.Leu1726Leu	splice_region_variant&synonymous_variant	LOW	24	0	0.039	31	6	0.251	1.52229
Aplan-10-3625-Thy_vs_Aplan-Pooled-Tail-Ref	chr3	88905457	88905457	C	G	Gon4l	c.5592C>G	p.Thr1864Thr	synonymous_variant	LOW	116	0	0.011	44	15	0.353	6.09516
Aplan-10-3625-Thy_vs_Aplan-Pooled-Tail-Ref	chr3	89092335	89092335	C	G	Rusc1	c.139G>C	p.Gly47Arg	missense_variant	MODERATE	116	0	0.009824	28	10	0.37	7.76702
Aplan-10-3625-Thy_vs_Aplan-Pooled-Tail-Ref	chr3	89142403	89142403	C	G	Pklr	c.892C>G	p.Arg298Gly	missense_variant	MODERATE	187	0	0.006531	67	15	0.217	6.11031
Aplan-10-3625-Thy_vs_Aplan-Pooled-Tail-Ref	chr3	89148243	89148243	C	G	Hcn3	c.1696G>C	p.Gly566Arg	missense_variant	MODERATE	95	0	0.013	16	6	0.428	5.4514
Aplan-10-3625-Thy_vs_Aplan-Pooled-Tail-Ref	chr3	89221639	89221639	G	C	Thbs3	c.1548+5G>C		splice_region_variant&intron_variant	LOW	112	0	0.011	89	29	0.351	6.04879
Aplan-10-3625-Thy_vs_Aplan-Pooled-Tail-Ref	chr3	89343407	89343407	G	C	Adam15	c.1901C>G	p.Thr634Ser	missense_variant	MODERATE	116	1	0.011	28	7	0.261	4.42789
Aplan-10-3625-Thy_vs_Aplan-Pooled-Tail-Ref	chr3	89365189	89365189	G	C	Dcst1	c.-35C>G		5_prime_UTR_variant	MODIFIER	130	0	0.008759	26	9	0.409	7.58148
Aplan-10-3625-Thy_vs_Aplan-Pooled-Tail-Ref	chr3	89749693	89749693	C	G	Adar	c.2923C>G	p.Arg975Gly	missense_variant	MODERATE	78	0	0.015	32	11	0.346	6.51909
Aplan-10-3625-Thy_vs_Aplan-Pooled-Tail-Ref	chr3	89761388	89761388	C	G	Chrnb2	c.619G>C	p.Ala207Pro	missense_variant	MODERATE	78	0	0.015	27	11	0.387	7.28125
Aplan-10-3625-Thy_vs_Aplan-Pooled-Tail-Ref	chr3	90232445	90232445	G	C	Jtb	c.138G>C	p.Ser46Ser	synonymous_variant	LOW	282	0	0.004252	94	35	0.348	6.20315
Aplan-10-3625-Thy_vs_Aplan-Pooled-Tail-Ref	chr3	90392301	90392301	G	C	Ints3	c.2959C>G	p.Arg987Gly	missense_variant	MODERATE	175	1	0.013	36	16	0.394	6.44204
Aplan-10-3625-Thy_vs_Aplan-Pooled-Tail-Ref	chr3	92605251	92605251	C	G	Smcp-Lce6a	n.92605251C>G		intergenic_region	MODIFIER	101	0	0.012	41	16	0.4	6.46892
Aplan-10-3625-Thy_vs_Aplan-Pooled-Tail-Ref	chr3	93074229	93074229	C	G	Gm4858	c.709C>G	p.Gln237Glu	missense_variant	MODERATE	313	0	0.003854	158	52	0.356	5.89546
Aplan-10-3625-Thy_vs_Aplan-Pooled-Tail-Ref	chr3	95170850	95170850	C	G	Sema6c	c.1536C>G	p.Ile512Met	missense_variant	MODERATE	181	0	0.006705	53	24	0.412	6.94299
Aplan-10-3625-Thy_vs_Aplan-Pooled-Tail-Ref	chr3	95255129	95255129	G	C	Prune	c.1232C>G	p.Thr411Arg	missense_variant	MODERATE	137	0	0.008788	55	20	0.383	6.18372
Aplan-10-3625-Thy_vs_Aplan-Pooled-Tail-Ref	chr3	95255141	95255141	G	C	Prune	c.1220C>G	p.Pro407Arg	missense_variant	MODERATE	137	0	0.00869	51	19	0.4	6.03463
Aplan-10-3625-Thy_vs_Aplan-Pooled-Tail-Ref	chr3	95556149	95556149	C	G	Ctss	c.990C>G	p.Cys330Trp	missense_variant	MODERATE	178	0	0.007356	179	65	0.329	5.70262
Aplan-10-3625-Thy_vs_Aplan-Pooled-Tail-Ref	chr3	95681308	95681308	C	G	Adamtsl4	c.1593G>C	p.Gly531Gly	synonymous_variant	LOW	220	0	0.005641	56	10	0.227	7.22616
Aplan-10-3625-Thy_vs_Aplan-Pooled-Tail-Ref	chr3	95734876	95734876	T	C	Ecm1	c.1396A>G	p.Ile466Val	missense_variant	MODERATE	328	0	0.00385	51	37	0.659	6.58234
Aplan-10-3625-Thy_vs_Aplan-Pooled-Tail-Ref	chr3	96854557	96854557	A	G	Pdzk1	c.484A>G	p.Asn162Asp	missense_variant	MODERATE	156	0	0.008361	84	70	0.817	5.82099
Aplan-10-3625-Thy_vs_Aplan-Pooled-Tail-Ref	chr3	96869202	96869202	G	C	Pdzk1	c.1477G>C	p.Glu493Gln	missense_variant	MODERATE	140	0	0.008935	30	12	0.393	6.43528
Aplan-10-3625-Thy_vs_Aplan-Pooled-Tail-Ref	chr3	97741262	97741262	C	G	Pde4dip	c.3181+56G>C		intron_variant	MODIFIER	40	0	0.031	24	8	0.391	3.77946
Aplan-10-3625-Thy_vs_Aplan-Pooled-Tail-Ref	chr3	97747529	97747529	G	C	Pde4dip	c.2581C>G	p.Arg861Gly	missense_variant	MODERATE	353	0	0.003609	78	27	0.346	6.08834
Aplan-10-3625-Thy_vs_Aplan-Pooled-Tail-Ref	chr3	98123831	98123831	G	C	Notch2	c.3270G>C	p.Pro1090Pro	synonymous_variant	LOW	114	1	0.011	25	5	0.227	3.1585
Aplan-10-3625-Thy_vs_Aplan-Pooled-Tail-Ref	chr3	100888222	100888222	C	G	Vtcn1	c.504C>G	p.Cys168Trp	missense_variant	MODERATE	573	0	0.002287	89	23	0.279	6.12073
Aplan-10-3625-Thy_vs_Aplan-Pooled-Tail-Ref	chr3	101883554	101883554	C	G	Slc22a15	c.634G>C	p.Ala212Pro	missense_variant	MODERATE	57	0	0.021	47	15	0.318	5.80261
Aplan-10-3625-Thy_vs_Aplan-Pooled-Tail-Ref	chr3	102110223	102110223	C	G	Casq2	c.235-17C>G		intron_variant	MODIFIER	197	0	0.006502	76	25	0.313	6.72292
Aplan-10-3625-Thy_vs_Aplan-Pooled-Tail-Ref	chr3	103088332	103088332	C	T	Ampd1	c.557C>T	p.Pro186Leu	missense_variant	MODERATE	87	0	0.013	38	14	0.364	6.40619
Aplan-10-3625-Thy_vs_Aplan-Pooled-Tail-Ref	chr3	103753435	103753435	G	C	Hipk1	c.2183C>G	p.Thr728Ser	missense_variant	MODERATE	121	0	0.01	35	13	0.379	5.9974
Aplan-10-3625-Thy_vs_Aplan-Pooled-Tail-Ref	chr3	103838585	103838585	C	G	Bcl2l15	c.*35C>G		3_prime_UTR_variant	MODIFIER	81	0	0.015	57	20	0.379	7.06049
Aplan-10-3625-Thy_vs_Aplan-Pooled-Tail-Ref	chr3	103890268	103890268	C	G	Ptpn22	c.2026C>G	p.Arg676Gly	missense_variant	MODERATE	139	0	0.00923	122	35	0.305	6.16923
Aplan-10-3625-Thy_vs_Aplan-Pooled-Tail-Ref	chr3	104003624	104003624	G	C	Phtf1	c.2043+22G>C		intron_variant	MODIFIER	72	0	0.015	59	25	0.409	5.95971
Aplan-10-3625-Thy_vs_Aplan-Pooled-Tail-Ref	chr3	104085265	104085265	G	C	Magi3	c.890C>G	p.Pro297Arg	missense_variant	MODERATE	132	0	0.009545	81	26	0.328	6.55377
Aplan-10-3625-Thy_vs_Aplan-Pooled-Tail-Ref	chr3	106114673	106114673	G	C	Chia1	c.54G>C	p.Leu18Leu	splice_region_variant&synonymous_variant	LOW	186	0	0.006762	96	25	0.288	5.96567
Aplan-10-3625-Thy_vs_Aplan-Pooled-Tail-Ref	chr3	107214287	107214287	C	G	Cym	c.688G>C	p.Asp230His	missense_variant	MODERATE	196	0	0.006394	56	15	0.271	7.14862
Aplan-10-3625-Thy_vs_Aplan-Pooled-Tail-Ref	chr3	107613419	107613419	G	C	Strip1	c.2314C>G	p.Arg772Gly	missense_variant	MODERATE	68	0	0.017	25	7	0.304	4.29464
Aplan-10-3625-Thy_vs_Aplan-Pooled-Tail-Ref	chr3	107632897	107632897	C	G	Strip1	c.-1217G>C		upstream_gene_variant	MODIFIER	174	0	0.006741	80	15	0.227	6.34312
Aplan-10-3625-Thy_vs_Aplan-Pooled-Tail-Ref	chr3	107868329	107868329	C	G	Csf1-Eps8l3	n.107868329C>G		intergenic_region	MODIFIER	84	0	0.012	44	15	0.357	6.12609
Aplan-10-3625-Thy_vs_Aplan-Pooled-Tail-Ref	chr3	107928879	107928879	C	G	Gstm7	c.558G>C	p.Ala186Ala	synonymous_variant	LOW	253	0	0.004857	160	57	0.375	5.82854
Aplan-10-3625-Thy_vs_Aplan-Pooled-Tail-Ref	chr3	107986093	107986093	C	G	Gstm2	c.53G>C	p.Arg18Pro	missense_variant	MODERATE	136	0	0.008685	86	19	0.235	6.82307
Aplan-10-3625-Thy_vs_Aplan-Pooled-Tail-Ref	chr3	108080684	108080684	G	C	Ampd2	c.310C>G	p.Arg104Gly	missense_variant	MODERATE	175	0	0.007796	38	15	0.402	7.19892
Aplan-10-3625-Thy_vs_Aplan-Pooled-Tail-Ref	chr3	108338930	108338930	C	G	Sort1	c.1222C>G	p.Leu408Val	missense_variant	MODERATE	129	0	0.008854	75	25	0.349	6.48515
Aplan-10-3625-Thy_vs_Aplan-Pooled-Tail-Ref	chr3	108383884	108383884	C	G	Psrc1	c.-43C>G		5_prime_UTR_variant	MODIFIER	64	0	0.017	28	10	0.435	5.73994
Aplan-10-3625-Thy_vs_Aplan-Pooled-Tail-Ref	chr3	108396665	108396665	C	G	Celsr2	c.7108-32G>C		intron_variant	MODIFIER	89	0	0.014	46	18	0.368	6.41819
Aplan-10-3625-Thy_vs_Aplan-Pooled-Tail-Ref	chr3	108619291	108619291	C	G	Wdr47	c.1129C>G	p.Arg377Gly	missense_variant&splice_region_variant	MODERATE	119	0	0.009897	83	31	0.348	6.29867
Aplan-10-3625-Thy_vs_Aplan-Pooled-Tail-Ref	chr3	108778175	108778175	G	C	Aknad1	c.1685-51G>C		intron_variant	MODIFIER	66	0	0.019	63	18	0.326	5.6693
Aplan-10-3625-Thy_vs_Aplan-Pooled-Tail-Ref	chr3	108958643	108958643	G	C	Henmt1	c.683G>C	p.Gly228Ala	missense_variant	MODERATE	166	0	0.007623	70	22	0.296	6.8353
Aplan-10-3625-Thy_vs_Aplan-Pooled-Tail-Ref	chr3	116561258	116561258	G	C	Lrrc39	c.-4550G>C		upstream_gene_variant	MODIFIER	266	1	0.008754	99	78	0.786	5.81014
Aplan-10-3625-Thy_vs_Aplan-Pooled-Tail-Ref	chr3	116578414	116578414	G	C	Trmt13	c.*2998C>G		downstream_gene_variant	MODIFIER	94	0	0.013	68	18	0.252	7.4341
Aplan-10-3625-Thy_vs_Aplan-Pooled-Tail-Ref	chr3	116970249	116970249	C	G	Palmd	c.-1707G>C		upstream_gene_variant	MODIFIER	129	0	0.01	36	14	0.407	6.83127
Aplan-10-3625-Thy_vs_Aplan-Pooled-Tail-Ref	chr3	117838917	117838917	C	G	Snx7	c.524G>C	p.Arg175Pro	missense_variant	MODERATE	83	0	0.015	44	14	0.351	7.12947
Aplan-10-3625-Thy_vs_Aplan-Pooled-Tail-Ref	chr3	117838963	117838963	C	G	Snx7	c.478G>C	p.Val160Leu	missense_variant	MODERATE	83	0	0.015	56	24	0.406	5.9534
Aplan-10-3625-Thy_vs_Aplan-Pooled-Tail-Ref	chr3	122128180	122128180	C	G	Abca4	c.3384C>G	p.Asp1128Glu	missense_variant	MODERATE	42	0	0.025	31	7	0.28	2.79213
Aplan-10-3625-Thy_vs_Aplan-Pooled-Tail-Ref	chr3	122257282	122257282	C	G	Gclm	c.192+1672C>G		intron_variant	MODIFIER	195	0	0.006159	72	17	0.26	7.11822
Aplan-10-3625-Thy_vs_Aplan-Pooled-Tail-Ref	chr3	123112921	123112921	G	C	Synpo2	c.2745C>G	p.Pro915Pro	synonymous_variant	LOW	153	0	0.007037	73	22	0.326	6.16522
Aplan-10-3625-Thy_vs_Aplan-Pooled-Tail-Ref	chr3	123114122	123114122	G	C	Synpo2	c.1544C>G	p.Pro515Arg	missense_variant	MODERATE	266	0	0.004511	108	36	0.322	6.1062
Aplan-10-3625-Thy_vs_Aplan-Pooled-Tail-Ref	chr3	123354963	123354963	C	G	Sec24d	c.2255C>G	p.Thr752Arg	missense_variant	MODERATE	60	0	0.017	45	14	0.325	5.74022
Aplan-10-3625-Thy_vs_Aplan-Pooled-Tail-Ref	chr3	124321374	124321374	C	G	Tram1l1	c.182C>G	p.Ala61Gly	missense_variant	MODERATE	154	0	0.007976	54	14	0.273	7.07791
Aplan-10-3625-Thy_vs_Aplan-Pooled-Tail-Ref	chr3	124322777	124322777	C	G	Tram1l1	c.*493C>G		3_prime_UTR_variant	MODIFIER	312	0	0.004081	193	51	0.265	5.9569
Aplan-10-3625-Thy_vs_Aplan-Pooled-Tail-Ref	chr3	125437819	125437819	A	G	Ndst4	c.36A>G	p.Arg12Arg	synonymous_variant	LOW	130	0	0.008487	62	13	0.21	6.78873
Aplan-10-3625-Thy_vs_Aplan-Pooled-Tail-Ref	chr3	127048187	127048187	C	G	Ank2	c.775G>C	p.Ala259Pro	missense_variant	MODERATE	106	0	0.011	72	14	0.206	5.86219
Aplan-10-3625-Thy_vs_Aplan-Pooled-Tail-Ref	chr3	127681224	127681224	C	G	Alpk1	c.1129G>C	p.Ala377Pro	missense_variant	MODERATE	149	0	0.007979	58	18	0.326	6.32058
[truncated: 12,938 more rows]
