# Supplementary material for: 5-Aza-4’-thio-2’-deoxycytidine induces C&gt;G transversions in a specific trinucleotide context and leads to acute lymphoid leukemia
Source: Research Square preprint supplement (doi:10.21203/rs.3.rs-3186246/v1), 2023-12-19
Supplement: Supplementary file 11 [file df215a1f8b49e5f1e2a2e7b0.xlsx]

## Sheet: Data
Mouse #	Experiment	Treatment	# Cycles at Death	Diagnoses	BM NHD13 %	Spleen NHD13 %	Thymus NHD13 %	Most Recent PB NHD13 %	FACS Description	TCR or IgH Rearrangmenet
3501	8th	PBS	7	Recipient T-ALL	0	N/A	N/A	0.0325	CD4+/CD8+	Not Done
3502	8th	PBS	8	Survived to Endpoint	0.576	0.0471	N/A	N/A	Mac1+/Gr1+	Not Done
3503	8th	PBS	7	Recipient T-ALL	0.01	0.01	ND	0.4392	CD4+/CD8+	Not Done
3504	8th	PBS	5	Unknown	FD	FD	FD	32.88% *	Found Dead	N/A
3505	8th	PBS	8	Survived to Endpoint	ND	ND	ND	N/A	Not Done	Not Done
3506	8th	PBS	8	Recipient T-ALL	0.133	0.103	0.107	0.1819	CD8+/CD4het	V4-J1S6, V29-J2S3
3507	8th	1.0 mg/kg ATC	4	Unknown	FD	FD	FD	38.05% *	Found Dead	N/A
3508	8th	1.0 mg/kg ATC	4	Unknown	FD	FD	FD	4.65% *	Found Dead	N/A
3509	8th	1.0 mg/kg ATC	5	Donor B-ALL	0.736	0.51	0.774	0.79	Negative for Lineage Markers	Not Done
3510	8th	1.0 mg/kg ATC	4	Recipient T-ALL	0.005	0.01	0.006	0.4003	CD8+/CD4het	Not Done
3511	8th	1.0 mg/kg ATC	4	Unknown	FD	FD	FD	22.02% *	Found Dead	N/A
3512	8th	1.0 mg/kg ATC	5	Unknown	FD	FD	FD	46.83% *	Found Dead	N/A
3585	9th	PBS	9	Myelofibrosis	0.095	0.084	N/A	0.0507	Unremarkable	N/A
3586	9th	PBS	14	Donor AML	0.9	0.66	N/A	0.055	Mac1+/Gr1+	N/A
3587	9th	PBS	6	Donor T-ALL	0.456	0.158	0.8	0.6956	CD4het	D1-J1S3, D1-J2S7
3588	9th	PBS	6	Unknown	FD	FD	FD	87.4% *	Found Dead	N/A
3589	9th	PBS	7	Donor AML	0.851	0.554	N/A	0.6276	Mac1+/Gr1+	None Detected
3590	9th	PBS	7	Donor ETP	0.768	0.545	0.992	0.4629	Negative for Lineage Markers	D1-J1S3
3591	9th	PBS	11	Unknown	FD	FD	FD	3.13% *	Found Dead	N/A
3595	9th	0.5 mg/kg ATC	3	Recipient T-ALL	0.0071	0.0025	0.001	0.0381	CD4+/CD8+	J2S7, V12S1
3596	9th	0.5 mg/kg ATC	2	Donor ETP	0.889	0.253	0.85	0.3595	Negative for Lineage Markers	D1- J1S3
3597	9th	0.5 mg/kg ATC	4	Donor ETP	0.821	0.304	0.892	0.18	Negative for Lineage Markers	D1-J1S3
3598	9th	0.5 mg/kg ATC	4	Donor ETP-ALL in BM/Spl. Recipient T-ALL in thymus	0.22	0.05	0.24	0.027	BM, Spl: Negative for Lineage Markers. Thymus: CD4+/CD8+	D1 - J1S3, D2-J2S3 and V6S1 D2-J2S4,
3599	9th	0.5 mg/kg ATC	3	Unknown	FD	FD	FD	20.28% *	Found Dead	N/A
3600	9th	0.5 mg/kg ATC	3	Recipient T-ALL in thymus. Donor AML in BM.	0.665	0.128	0.0341	0.2065	BM: Mac1+/Gr1+, Thy: CD8+/CD4het	V5S1-J1S1
3601	9th	0.5 mg/kg ATC	2	Unknown	FD	FD	FD	52.8% *	Found Dead	N/A
3612	10th	PBS	10	donor AML	0.915	0.32	N/A	0.38	Mac1+/Gr1+	N/A
3613	10th	PBS	10	donor AML	0.557	0.273	N/A	0.528	Mac1+/Gr1+	N/A
3614	10th	PBS	4	donor AML	0.978	0.738	N/A	0.5319	Mac1+/Gr1+	N/A
3615	10th	PBS	4	Donor AML	0.738	0.505	N/A	0.7715	Mac1+/Gr1+	N/A
3616	10th	PBS	9	Donor MDS	FD	FD	FD	0.114	Found Dead	N/A
3617	10th	0.1 mg/kg ATC	9	Donor AML	0.694	0.321	N/A	0.575	Mac1+/Gr1+	N/A
3618	10th	0.1 mg/kg ATC	2	Donor AML	0.884	0.449	N/A	0.5257	Mac1+/Gr1+	N/A
3619	10th	0.1 mg/kg ATC	6	Recipient T-ALL	FD	FD	FD	0.0638	Found Dead	D1-J1S4, V8S2 -J1S5
3620	10th	0.1 mg/kg ATC	6	Donor AML	FD	FD	FD	0.893	Found Dead	D1-J1S5
3621	10th	0.1 mg/kg ATC	6	Donor AML	0.941	0.603	0.051	0.276	Mac1+/Gr1+	N/A
3622	10th	0.1 mg/kg ATC	11	Donor AML	FD	FD	FD	0.744	Found Dead	N/A
3623	10th	0.1 mg/kg ATC	6	Donor AML	FD	FD	FD	0.507	Found Dead	N/A
3624	10th	0.1 mg/kg ATC	4	Unknown	FD	FD	FD	29.55% *	Found Dead	N/A
3625	10th	0.1 mg/kg ATC	6	Recipient T-ALL.	0.739	0.361	0.0272	0.153	CD8+/CD4het	D1-J1S5, V5S1 -J2S7,
3626	10th	0.1 mg/kg ATC	3	Unknown	FD	FD	FD	29.32% *	Found Dead	N/A
3627	10th	0.1 mg/kg ATC	2	Donor AML	0.774	0.474	N/A	0.6001	Mac1+/Gr1+	N/A
3628	10th	0.1 mg/kg ATC	2	Donor AML	0.88	0.435	N/A	0.5202	Mac1+/Gr1+	N/A
3629	10th	1 mg/kg ATC	5	Unknown	FD	FD	FD	54.17% *	Found Dead	N/A
3630	10th	1 mg/kg ATC	5	Recipient T-ALL	0.547	0.381	0.03	0.2597	CD4+/CD8+	V5S1-J1S3,
3631	10th	1 mg/kg ATC	4	Recipient T-ALL	0.504	0.203	0.0294	0.5277	BM: Mac1+/Gr1+, Thy: CD8+/CD4het	D1-J1S3
3632	10th	1 mg/kg ATC	3	Recipient T-ALL	0.387	0.0751	0.008	0.153	CD8+/CD4het	Not Done
3633	10th	1 mg/kg ATC	5	Unknown	FD	FD	FD	37.63% *	Found Dead	N/A
3634	10th	1 mg/kg ATC	4	Donor AML in BM/Spl. Recipient T-ALL in thymus	0.8	0.271	0.125	0.7133	Mac1+/Gr1+, LN: CD4+/CD8+	Not Done
3650	11th	PBS	10	Donor AML	0.886	0.0785	0.563	0.173	Mac1+/Gr1+	N/A
3651	11th	PBS	7	Donor AML	0.831	0	N/A	0.747	Mac1+/Gr1+	N/A
3652	11th	PBS	11	Donor AML	0.959	0.0204	0.22	0.755	Mac1+/Gr1+	N/A
3653	11th	PBS	13	Donor MDS	0.528	0.0008	0.075	0.0632	Mac1+/Gr1+	N/A
3654	11th	PBS	13	Donor MDS	0.0782	0	0.0143	0.0263	Mac1+/Gr1+	N/A
3655	11th	PBS	9	Donor AML	0.909	0.0012	0.52	0.296	Mac1+/Gr1+	N/A
3656	11th	0.1 mg/kg ATC	7	Recipient T-ALL	0.0024	0	0	0	CD8+	V8S2-D1-J1S6, V8S2-D2-J2S7
3657	11th	0.1 mg/kg ATC	11	Donor AML	0.64	0.00072	0.093	0.236	Mac1+/Gr1+/cKit+	Polyclonal VDJ
3658	11th	0.1 mg/kg ATC	13	Donor MDS	0.716	0.0157	0.274	0.516	Mac1+/Gr1+	N/A
3659	11th	0.1 mg/kg ATC	9	Unknown	FD	FD	FD	8.47% *	Found Dead	N/A
3660	11th	0.1 mg/kg ATC	10	Donor AML	0.916	0.0118	0.501	0.759	Mac1+/Gr1+	Polyclonal VDJ
3661	11th	0.1 mg/kg ATC	12	Unknown	FD	FD	FD	10.3% *	Found Dead	N/A
3662	11th	0.5 mg/kg ATC	6	Recipient T-ALL	1.2e-05	0	0.00026	0	CD8+/CD4het	V8S3-D2-J2S4)
3664	11th	0.5 mg/kg ATC	7	Recipient T-ALL, Recipient ETP ALL	0.00032	0	0	0	CD8+	D1-J1S3, D2-J2S3, D2-J2S7)
3665	11th	0.5 mg/kg ATC	6	Unknown	FD	FD	FD	0% *	Found Dead	N/A
3666	11th	0.5 mg/kg ATC	5	Recipient T-ALL	0.0695	0	0.0021	0.0232	CD8+/CD4het	V8S2-D1-J2S7
3667	11th	0.5 mg/kg ATC	5	Unknown	FD	FD	FD	5.98% *	Found Dead	N/A
3668	11th	0.5 mg/kg ATC	5	immature Donor AML, Recipient ETP ALL	0.843	0.0038	0.473	0.715	BM: Negative for Lineage Markers. Thymus: CD8+	D1-J1S4
3669	11th	1 mg/kg ATC	5	Recipient T-ALL	0.0475	0.00014	0.0018	0.00042	CD8+	V10S1-D1-J1S4
3670	11th	1 mg/kg ATC	5	Recipient T-ALL	0.275	0.00094	0.291	0.0024	CD8+	V11S1-D2-J2S2
3671	11th	1 mg/kg ATC	5	Donor MDS, Recipient T-ALL	0.659	0.0021	0.306	0.0179	CD4+/8+	V6S1-D2-J2S5/J2S4
3672	11th	1 mg/kg ATC	5	Unknown	FD	FD	FD	0.18% *	Found Dead	N/A
3673	11th	1 mg/kg ATC	5	Donor MDS, Recipient T-ALL	0.0021	0	0.00065	0.0014	CD8+	V4S1-D2-J2S4
3674	11th	1 mg/kg ATC	5	Recipient B-ALL, Recipient T-ALL	0.304	0.0018	0.0121	0.0581	Thymus: CD8+. BM and Spl: CD19+/B220-	Thymus VDJ: V8S3-D1-J2S1 and BM and Spl IgH:V14-2-D5-8-J2/J3
AML = Acute Myeloid Leukemia, T-ALL = T cell acute lymphoblastic leukemia, B-ALL = B cell acute lymphoblastic leukemia, ETP = Early thymic progenitor acute lymphoblastic leukemia, MDS= Myelodysplastic Syndrome, N/A = Not applicable, either the mouse did not have evidence of ALL or was found dead
* Mouse found dead, value reflects most recent CBC prior to death
