# Supplementary material for: 5-Aza-4’-thio-2’-deoxycytidine induces C&gt;G transversions in a specific trinucleotide context and leads to acute lymphoid leukemia
Source: Research Square preprint supplement (doi:10.21203/rs.3.rs-3186246/v1), 2023-12-19
Supplement: Supplementary file 12 [file f01bd4de54cafa3427f4eabb.xlsx]

## Sheet: Sheet1
SampleName	Chr	Start	End	REF	ALT	Gene_Name	HGVS.c	Annotation	Annotation_Impact	Feature_Type	DP_NORMAL	AD_NORMAL.2	AF_NORMAL	DP_TUMOR	AD_TUMOR.2	AF_TUMOR	VariantType	LOG_FISHER	Number of Identicial Mutations
S3639-THY-resent_vs_S3639-LIVER-resent	chr2	91373136	91373136	G	C	1110051M20Rik	c.280+10593C>G	intron_variant	MODIFIER	transcript	57	1	0.018	77	36	0.461	SNP	6.39372	2
S3666-THY_vs_S3666-TAIL-resent	chr2	91373136	91373136	G	C	1110051M20Rik	c.280+10593C>G	intron_variant	MODIFIER	transcript	97	0	0	90	24	0.267	SNP	5.98109	2
S3639-THY-resent_vs_S3639-LIVER-resent	chr6	86620496	86620496	G	C	1600020E01Rik-Asprv1	n.86620496G>C	intergenic_region	MODIFIER	intergenic_region	63	0	0	81	36	0.444	SNP	6.33269	2
S3673-THY-resent_vs_S3673-TAIL-resent	chr6	86620496	86620496	G	C	1600020E01Rik-Asprv1	n.86620496G>C	intergenic_region	MODIFIER	intergenic_region	112	0	0	88	46	0.529	SNP	5.96306	2
S3666-THY_vs_S3666-TAIL-resent	chr9	57300651	57300651	G	C	1700017B05Rik-4930430J02Rik	n.57300651G>C	intergenic_region	MODIFIER	intergenic_region	93	0	0	94	34	0.362	SNP	6.13589	2
S3669-THY_vs_S3669-TAIL	chr9	57300651	57300651	G	C	1700017B05Rik-4930430J02Rik	n.57300651G>C	intergenic_region	MODIFIER	intergenic_region	63	0	0	89	43	0.483	SNP	5.87896	2
S3635-THY-resent_vs_S3635-LIVER	chr15	46395191	46395191	G	C	1700022A22Rik-4930523O13Rik	n.46395191G>C	intergenic_region	MODIFIER	intergenic_region	48	1	0.021	39	18	0.462	SNP	6.35824	2
S3669-THY_vs_S3669-TAIL	chr15	46395191	46395191	G	C	1700022A22Rik-4930523O13Rik	n.46395191G>C	intergenic_region	MODIFIER	intergenic_region	54	0	0	55	18	0.327	SNP	5.84018	2
S3635-THY-resent_vs_S3635-LIVER	chr9	92435930	92435930	G	C	1700057G04Rik-Plscr4	n.92435930G>C	intergenic_region	MODIFIER	intergenic_region	51	1	0.02	70	32	0.449	SNP	6.07231	2
S3673-THY-resent_vs_S3673-TAIL-resent	chr9	92435930	92435930	G	C	1700057G04Rik-Plscr4	n.92435930G>C	intergenic_region	MODIFIER	intergenic_region	77	1	0.013	66	36	0.531	SNP	6.0899	2
S3639-THY-resent_vs_S3639-LIVER-resent	chr14	40804911	40804911	C	G	1700109I08Rik-Sh2d4b	n.40804911C>G	intergenic_region	MODIFIER	intergenic_region	55	0	0	65	18	0.277	SNP	5.05561	2
S3666-THY_vs_S3666-TAIL-resent	chr14	40804911	40804911	C	G	1700109I08Rik-Sh2d4b	n.40804911C>G	intergenic_region	MODIFIER	intergenic_region	117	0	0	96	36	0.375	SNP	6.23051	2
S3639-THY-resent_vs_S3639-LIVER-resent	chr6	86486519	86486519	G	C	2310040G24Rik	n.433+1276C>G	intron_variant	MODIFIER	transcript	62	0	0	63	33	0.525	SNP	6.38337	2
S3666-THY_vs_S3666-TAIL-resent	chr6	86486519	86486519	G	C	2310040G24Rik	n.433+1276C>G	intron_variant	MODIFIER	transcript	85	0	0	89	22	0.247	SNP	5.9963	2
S3642-THY_vs_S3642-LIVER-resent	chr15	38579357	38579357	G	C	2310043O21Rik	n.414+7671C>G	intron_variant	MODIFIER	transcript	99	1	0.01	88	19	0.218	SNP	5.46561	2
S3669-THY_vs_S3669-TAIL	chr15	38579357	38579357	G	C	2310043O21Rik	n.414+7671C>G	intron_variant	MODIFIER	transcript	89	0	0	112	39	0.355	SNP	5.88429	2
S3600-THY_vs_S3600-LIVER-resent	chr12	5671777	5671777	C	G	2810032G03Rik-1700101O22Rik	n.5671777C>G	intergenic_region	MODIFIER	intergenic_region	62	0	0	121	55	0.455	SNP	5.91614	2
S3669-THY_vs_S3669-TAIL	chr12	5671777	5671777	C	G	2810032G03Rik-1700101O22Rik	n.5671777C>G	intergenic_region	MODIFIER	intergenic_region	81	0	0	67	32	0.478	SNP	6.28546	2
S3600-THY_vs_S3600-LIVER-resent	chr11	28713441	28713441	G	C	2810471M01Rik-Mir216b	n.28713441G>C	intergenic_region	MODIFIER	intergenic_region	58	0	0	102	47	0.47	SNP	5.86123	2
S3669-THY_vs_S3669-TAIL	chr11	28713441	28713441	G	C	2810471M01Rik-Mir216b	n.28713441G>C	intergenic_region	MODIFIER	intergenic_region	69	0	0	77	34	0.442	SNP	5.90241	2
S3635-THY-resent_vs_S3635-LIVER	chr7	125234360	125234360	C	G	3100003L05Rik-4933440M02Rik	n.125234360C>G	intergenic_region	MODIFIER	intergenic_region	56	0	0	74	35	0.479	SNP	6.16035	2
S3673-THY-resent_vs_S3673-TAIL-resent	chr7	125234360	125234360	C	G	3100003L05Rik-4933440M02Rik	n.125234360C>G	intergenic_region	MODIFIER	intergenic_region	109	0	0	90	42	0.466	SNP	5.90913	2
S3635-THY-resent_vs_S3635-LIVER	chr9	41926198	41926198	G	C	3110039I08Rik-Sorl1	n.41926198G>C	intergenic_region	MODIFIER	intergenic_region	95	0	0	59	13	0.22	SNP	5.81014	2
S3666-THY_vs_S3666-TAIL-resent	chr9	41926198	41926198	G	C	3110039I08Rik-Sorl1	n.41926198G>C	intergenic_region	MODIFIER	intergenic_region	93	0	0	93	26	0.28	SNP	6.8459	2
S3666-THY_vs_S3666-TAIL-resent	chr2	150385912	150385912	C	G	3300002I08Rik-Zfp442	n.150385912C>G	intergenic_region	MODIFIER	intergenic_region	89	1	0.011	90	29	0.326	SNP	5.88009	2
S3673-THY-resent_vs_S3673-TAIL-resent	chr2	150385912	150385912	C	G	3300002I08Rik-Zfp442	n.150385912C>G	intergenic_region	MODIFIER	intergenic_region	103	1	0.01	57	26	0.456	SNP	6.94515	2
S3635-THY-resent_vs_S3635-LIVER	chr1	184797782	184797782	G	C	44256	c.763-2289C>G	intron_variant	MODIFIER	transcript	65	1	0.015	61	24	0.393	SNP	6.1811	2
S3673-THY-resent_vs_S3673-TAIL-resent	chr1	184797782	184797782	G	C	44256	c.763-2289C>G	intron_variant	MODIFIER	transcript	69	0	0	56	14	0.236	SNP	5.32434	2
S3635-THY-resent_vs_S3635-LIVER	chr5	47926664	47926664	C	G	4930405L22Rik-Slit2	n.47926664C>G	intergenic_region	MODIFIER	intergenic_region	74	0	0	51	12	0.235	SNP	5.04518	2
S3669-THY_vs_S3669-TAIL	chr5	47926664	47926664	C	G	4930405L22Rik-Slit2	n.47926664C>G	intergenic_region	MODIFIER	intergenic_region	55	0	0	67	18	0.273	SNP	5.02675	2
S3639-THY-resent_vs_S3639-LIVER-resent	chr9	115342224	115342224	C	G	4930428G15Rik	n.*300C>G	downstream_gene_variant	MODIFIER	transcript	59	1	0.017	107	51	0.477	SNP	5.88125	2
S3666-THY_vs_S3666-TAIL-resent	chr9	115342224	115342224	C	G	4930428G15Rik	n.*300C>G	downstream_gene_variant	MODIFIER	transcript	87	0	0	109	35	0.321	SNP	5.98803	2
S3642-THY_vs_S3642-LIVER-resent	chr14	72526575	72526575	G	C	4930434J06Rik-Fndc3a	n.72526575G>C	intergenic_region	MODIFIER	intergenic_region	80	1	0.013	64	14	0.222	SNP	4.33031	2
S3666-THY_vs_S3666-TAIL-resent	chr14	72526575	72526575	G	C	4930434J06Rik-Fndc3a	n.72526575G>C	intergenic_region	MODIFIER	intergenic_region	81	0	0	75	26	0.338	SNP	6.34837	2
S3635-THY-resent_vs_S3635-LIVER	chr13	18115698	18115698	C	G	4930448F12Rik-Pou6f2	n.18115698C>G	intergenic_region	MODIFIER	intergenic_region	73	1	0.014	68	37	0.544	SNP	5.88562	2
S3673-THY-resent_vs_S3673-TAIL-resent	chr13	18115698	18115698	C	G	4930448F12Rik-Pou6f2	n.18115698C>G	intergenic_region	MODIFIER	intergenic_region	90	0	0	83	19	0.232	SNP	6.58474	2
S3635-THY-resent_vs_S3635-LIVER	chr18	29215997	29215997	G	C	4930474G06Rik-4930578E11Rik	n.29215997G>C	intergenic_region	MODIFIER	intergenic_region	72	0	0	58	12	0.214	SNP	4.50943	2
S3666-THY_vs_S3666-TAIL-resent	chr18	29215997	29215997	G	C	4930474G06Rik-4930578E11Rik	n.29215997G>C	intergenic_region	MODIFIER	intergenic_region	97	0	0	101	33	0.33	SNP	6.20392	2
S3639-THY-resent_vs_S3639-LIVER-resent	chr4	27831851	27831851	C	G	4930548K13Rik-Epha7	n.27831851C>G	intergenic_region	MODIFIER	intergenic_region	46	0	0	51	26	0.51	SNP	5.81322	2
S3669-THY_vs_S3669-TAIL	chr4	27831851	27831851	C	G	4930548K13Rik-Epha7	n.27831851C>G	intergenic_region	MODIFIER	intergenic_region	65	0	0	67	22	0.324	SNP	6.14738	2
S3669-THY_vs_S3669-TAIL	chr7	125436360	125436360	G	C	4930571K23Rik-Kdm8	n.125436360G>C	intergenic_region	MODIFIER	intergenic_region	76	0	0	102	33	0.324	SNP	6.02403	2
S3673-THY-resent_vs_S3673-TAIL-resent	chr7	125436360	125436360	G	C	4930571K23Rik-Kdm8	n.125436360G>C	intergenic_region	MODIFIER	intergenic_region	100	1	0.01	86	37	0.424	SNP	6.01064	2
S3635-THY-resent_vs_S3635-LIVER	chr8	13736395	13736395	G	C	4932443I19Rik	c.290+374G>C	intron_variant	MODIFIER	transcript	72	0	0	77	38	0.494	SNP	6.38044	2
S3673-THY-resent_vs_S3673-TAIL-resent	chr8	13736395	13736395	G	C	4932443I19Rik	c.290+374G>C	intron_variant	MODIFIER	transcript	91	0	0	84	33	0.398	SNP	6.4057	2
S3637-THY_vs_S3637-LIVER	chr4	62558359	62558359	C	G	4933430I17Rik-Rgs3	n.62558359C>G	intergenic_region	MODIFIER	intergenic_region	56	1	0.018	163	72	0.444	SNP	5.95986	2
S3639-THY-resent_vs_S3639-LIVER-resent	chr4	62558359	62558359	C	G	4933430I17Rik-Rgs3	n.62558359C>G	intergenic_region	MODIFIER	intergenic_region	60	1	0.017	79	42	0.532	SNP	6.06328	2
S3666-THY_vs_S3666-TAIL-resent	chr10	111840198	111840198	G	C	4933440J02Rik-Gm20758	n.111840198G>C	intergenic_region	MODIFIER	intergenic_region	81	0	0	77	24	0.32	SNP	6.19339	2
S3673-THY-resent_vs_S3673-TAIL-resent	chr10	111840198	111840198	G	C	4933440J02Rik-Gm20758	n.111840198G>C	intergenic_region	MODIFIER	intergenic_region	77	1	0.013	64	20	0.317	SNP	6.00041	2
S3669-THY_vs_S3669-TAIL	chr2	152428617	152428617	G	C	6820408C15Rik	c.67-308G>C	intron_variant	MODIFIER	transcript	77	0	0	98	42	0.423	SNP	6.11618	2
S3673-THY-resent_vs_S3673-TAIL-resent	chr2	152428617	152428617	G	C	6820408C15Rik	c.67-308G>C	intron_variant	MODIFIER	transcript	81	1	0.013	72	30	0.423	SNP	6.36403	2
S3600-THY_vs_S3600-LIVER-resent	chr14	68239354	68239354	C	G	A230070E04Rik-Adam7	n.68239354C>G	intergenic_region	MODIFIER	intergenic_region	75	0	0	113	47	0.42	SNP	6.06171	2
S3666-THY_vs_S3666-TAIL-resent	chr14	68239354	68239354	C	G	A230070E04Rik-Adam7	n.68239354C>G	intergenic_region	MODIFIER	intergenic_region	90	0	0	81	24	0.304	SNP	6.94263	2
S3669-THY_vs_S3669-TAIL	chr6	142701752	142701752	C	G	Abcc9	c.-20+65G>C	intron_variant	MODIFIER	transcript	80	1	0.013	75	22	0.293	SNP	5.81698	2
S3673-THY-resent_vs_S3673-TAIL-resent	chr6	142701752	142701752	C	G	Abcc9	c.-20+65G>C	intron_variant	MODIFIER	transcript	71	0	0	92	40	0.429	SNP	6.05864	2
S3635-THY-resent_vs_S3635-LIVER	chr3	36130178	36130178	C	G	Acad9-D3Ertd254e	n.36130178C>G	intergenic_region	MODIFIER	intergenic_region	67	1	0.015	54	23	0.426	SNP	6.68941	2
S3673-THY-resent_vs_S3673-TAIL-resent	chr3	36130178	36130178	C	G	Acad9-D3Ertd254e	n.36130178C>G	intergenic_region	MODIFIER	intergenic_region	76	0	0	88	20	0.227	SNP	5.57023	2
S3600-THY_vs_S3600-LIVER-resent	chrX	142480746	142480746	C	G	Acsl4-Tmem164	n.142480746C>G	intergenic_region	MODIFIER	intergenic_region	31	0	0	65	23	0.365	SNP	4.27079	2
S3635-THY-resent_vs_S3635-LIVER	chrX	142480746	142480746	C	G	Acsl4-Tmem164	n.142480746C>G	intergenic_region	MODIFIER	intergenic_region	62	0	0	48	10	0.213	SNP	3.85553	2
S3639-THY-resent_vs_S3639-LIVER-resent	chr5	142947660	142947660	G	C	Actb-Fscn1	n.142947660G>C	intergenic_region	MODIFIER	intergenic_region	46	0	0	69	31	0.449	SNP	5.99304	2
S3669-THY_vs_S3669-TAIL	chr5	142947660	142947660	G	C	Actb-Fscn1	n.142947660G>C	intergenic_region	MODIFIER	intergenic_region	75	0	0	84	51	0.607	SNP	5.84845	2
S3600-THY_vs_S3600-LIVER-resent	chr3	37063859	37063859	C	G	Adad1	c.118+19C>G	intron_variant	MODIFIER	transcript	93	0	0	126	59	0.468	SNP	5.90675	2
S3666-THY_vs_S3666-TAIL-resent	chr3	37063859	37063859	C	G	Adad1	c.118+19C>G	intron_variant	MODIFIER	transcript	87	0	0	95	31	0.33	SNP	6.01617	2
S3666-THY_vs_S3666-TAIL-resent	chr8	43601705	43601705	G	C	Adam26a-Gm5346	n.43601705G>C	intergenic_region	MODIFIER	intergenic_region	93	0	0	68	17	0.25	SNP	6.93215	2
S3669-THY_vs_S3669-TAIL	chr8	43601705	43601705	G	C	Adam26a-Gm5346	n.43601705G>C	intergenic_region	MODIFIER	intergenic_region	63	0	0	58	18	0.31	SNP	6.45289	2
S3669-THY_vs_S3669-TAIL	chr4	130019433	130019433	C	G	Adgrb2	c.4362+153C>G	intron_variant	MODIFIER	transcript	68	0	0	103	43	0.417	SNP	5.85875	2
S3673-THY-resent_vs_S3673-TAIL-resent	chr4	130019433	130019433	C	G	Adgrb2	c.4362+153C>G	intron_variant	MODIFIER	transcript	63	1	0.016	70	37	0.529	SNP	6.1379	2
S3600-THY_vs_S3600-LIVER-resent	chr10	67582971	67582971	G	C	Ado-Zfp365	n.67582971G>C	intergenic_region	MODIFIER	intergenic_region	87	0	0	117	49	0.419	SNP	6.07245	2
S3635-THY-resent_vs_S3635-LIVER	chr10	67582971	67582971	G	C	Ado-Zfp365	n.67582971G>C	intergenic_region	MODIFIER	intergenic_region	77	1	0.013	54	21	0.389	SNP	6.7259	2
S3637-THY_vs_S3637-LIVER	chr19	54282750	54282750	C	G	Adra2a-Gpam	n.54282750C>G	intergenic_region	MODIFIER	intergenic_region	63	1	0.016	117	50	0.421	SNP	6.23372	2
S3666-THY_vs_S3666-TAIL-resent	chr19	54282750	54282750	C	G	Adra2a-Gpam	n.54282750C>G	intergenic_region	MODIFIER	intergenic_region	99	0	0	77	18	0.24	SNP	7.00862	2
S3666-THY_vs_S3666-TAIL-resent	chr2	90804637	90804637	G	C	Agbl2	c.1678-1162G>C	intron_variant	MODIFIER	transcript	84	0	0	89	36	0.404	SNP	6.41695	2
S3669-THY_vs_S3669-TAIL	chr2	90804637	90804637	G	C	Agbl2	c.1678-1162G>C	intron_variant	MODIFIER	transcript	75	0	0	96	28	0.292	SNP	5.89381	2
S3666-THY_vs_S3666-TAIL-resent	chr13	107666611	107666611	C	G	AI197445-1700006H21Rik	n.107666611C>G	intergenic_region	MODIFIER	intergenic_region	101	0	0	96	32	0.326	SNP	5.91182	2
S3669-THY_vs_S3669-TAIL	chr13	107666611	107666611	C	G	AI197445-1700006H21Rik	n.107666611C>G	intergenic_region	MODIFIER	intergenic_region	87	0	0	108	35	0.324	SNP	6.0056	2
S3639-THY-resent_vs_S3639-LIVER-resent	chr7	126801157	126801157	C	G	Aldoa	c.-3043G>C	upstream_gene_variant	MODIFIER	transcript	36	0	0	62	20	0.323	SNP	4.39986	2
S3669-THY_vs_S3669-TAIL	chr7	126801157	126801157	C	G	Aldoa	c.-3043G>C	upstream_gene_variant	MODIFIER	transcript	60	0	0	50	11	0.208	SNP	4.05742	2
S3635-THY-resent_vs_S3635-LIVER	chr11	70337409	70337409	G	C	Alox12e-Alox15	n.70337409G>C	intergenic_region	MODIFIER	intergenic_region	37	0	0	25	11	0.44	SNP	5.05701	2
S3673-THY-resent_vs_S3673-TAIL-resent	chr11	70337409	70337409	G	C	Alox12e-Alox15	n.70337409G>C	intergenic_region	MODIFIER	intergenic_region	48	0	0	43	23	0.535	SNP	5.93544	2
S3639-THY-resent_vs_S3639-LIVER-resent	chr17	24156717	24156717	G	C	Amdhd2	c.1040-45C>G	intron_variant	MODIFIER	transcript	64	0	0	72	37	0.514	SNP	5.74673	2
S3669-THY_vs_S3669-TAIL	chr17	24156717	24156717	G	C	Amdhd2	c.1040-45C>G	intron_variant	MODIFIER	transcript	78	0	0	90	34	0.378	SNP	6.31337	2
S3635-THY-resent_vs_S3635-LIVER	chr9	20871357	20871357	G	C	Angptl6	c.*2525C>G	downstream_gene_variant	MODIFIER	transcript	75	1	0.013	62	35	0.565	SNP	5.88446	2
S3666-THY_vs_S3666-TAIL-resent	chr9	20871357	20871357	G	C	Angptl6	c.*2525C>G	downstream_gene_variant	MODIFIER	transcript	84	0	0	87	28	0.329	SNP	6.31065	2
S3642-THY_vs_S3642-LIVER-resent	chr11	89898983	89898983	G	C	Ankfn1-Pctp	n.89898983G>C	intergenic_region	MODIFIER	intergenic_region	77	1	0.013	85	27	0.3	SNP	5.85999	2
S3669-THY_vs_S3669-TAIL	chr11	89898983	89898983	G	C	Ankfn1-Pctp	n.89898983G>C	intergenic_region	MODIFIER	intergenic_region	82	0	0	105	51	0.49	SNP	5.93438	2
S3666-THY_vs_S3666-TAIL-resent	chr10	90531173	90531173	C	G	Anks1b	c.2404+18298C>G	intron_variant	MODIFIER	transcript	84	0	0	63	16	0.254	SNP	6.42482	2
S3669-THY_vs_S3669-TAIL	chr10	90531173	90531173	C	G	Anks1b	c.2404+18298C>G	intron_variant	MODIFIER	transcript	90	0	0	91	40	0.433	SNP	6.24956	2
S3642-THY_vs_S3642-LIVER-resent	chr11	65107598	65107598	G	C	Arhgap44	c.54-32388C>G	intron_variant	MODIFIER	transcript	100	0	0	77	25	0.329	SNP	5.9321	2
S3669-THY_vs_S3669-TAIL	chr11	65107598	65107598	G	C	Arhgap44	c.54-32388C>G	intron_variant	MODIFIER	transcript	67	0	0	74	34	0.459	SNP	5.99286	2
S3669-THY_vs_S3669-TAIL	chr15	84717034	84717034	G	C	Arhgap8	c.-15917G>C	upstream_gene_variant	MODIFIER	transcript	46	0	0	52	18	0.346	SNP	5.65537	2
S3673-THY-resent_vs_S3673-TAIL-resent	chr15	84717034	84717034	G	C	Arhgap8	c.-15917G>C	upstream_gene_variant	MODIFIER	transcript	64	1	0.016	66	41	0.635	SNP	6.22073	2
S3666-THY_vs_S3666-TAIL-resent	chr13	113895659	113895659	G	C	Arl15	c.49-26588G>C	intron_variant	MODIFIER	transcript	71	0	0	70	23	0.338	SNP	6.01199	2
S3673-THY-resent_vs_S3673-TAIL-resent	chr13	113895659	113895659	G	C	Arl15	c.49-26588G>C	intron_variant	MODIFIER	transcript	78	1	0.013	59	17	0.288	SNP	5.79936	2
S3600-THY_vs_S3600-LIVER-resent	chr2	15400893	15400893	G	C	Arl5b-Malrd1	n.15400893G>C	intergenic_region	MODIFIER	intergenic_region	55	0	0	92	49	0.527	SNP	5.81963	2
S3666-THY_vs_S3666-TAIL-resent	chr2	15400893	15400893	G	C	Arl5b-Malrd1	n.15400893G>C	intergenic_region	MODIFIER	intergenic_region	89	0	0	76	21	0.276	SNP	5.91954	2
S3666-THY_vs_S3666-TAIL-resent	chr6	124748704	124748704	C	G	Atn1	c.279+532G>C	intron_variant	MODIFIER	transcript	69	0	0	54	19	0.365	SNP	6.1495	2
S3669-THY_vs_S3669-TAIL	chr6	124748704	124748704	C	G	Atn1	c.279+532G>C	intron_variant	MODIFIER	transcript	43	0	0	51	26	0.5	SNP	6.53161	2
S3635-THY-resent_vs_S3635-LIVER	chr5	133873667	133873667	C	G	Auts2-Gatsl2	n.133873667C>G	intergenic_region	MODIFIER	intergenic_region	73	1	0.014	70	30	0.42	SNP	5.91522	2
S3642-THY_vs_S3642-LIVER-resent	chr5	133873667	133873667	C	G	Auts2-Gatsl2	n.133873667C>G	intergenic_region	MODIFIER	intergenic_region	93	0	0	78	17	0.221	SNP	6.25535	2
S3600-THY_vs_S3600-LIVER-resent	chr6	95426619	95426619	C	G	AY512915-Suclg2	n.95426619C>G	intergenic_region	MODIFIER	intergenic_region	52	0	0	90	48	0.533	SNP	5.91957	2
S3666-THY_vs_S3666-TAIL-resent	chr6	95426619	95426619	C	G	AY512915-Suclg2	n.95426619C>G	intergenic_region	MODIFIER	intergenic_region	102	0	0	92	36	0.391	SNP	6.20106	2
S3666-THY_vs_S3666-TAIL-resent	chr6	30203084	30203084	C	G	BB283400-Ube2h	n.30203084C>G	intergenic_region	MODIFIER	intergenic_region	79	0	0	70	25	0.357	SNP	6.06607	2
S3669-THY_vs_S3669-TAIL	chr6	30203084	30203084	C	G	BB283400-Ube2h	n.30203084C>G	intergenic_region	MODIFIER	intergenic_region	65	0	0	79	36	0.456	SNP	5.79736	2
S3639-THY-resent_vs_S3639-LIVER-resent	chr16	24328779	24328779	G	C	Bcl6-Lppos	n.24328779G>C	intergenic_region	MODIFIER	intergenic_region	73	1	0.014	97	23	0.237	SNP	4.98593	2
S3673-THY-resent_vs_S3673-TAIL-resent	chr16	24328779	24328779	G	C	Bcl6-Lppos	n.24328779G>C	intergenic_region	MODIFIER	intergenic_region	103	1	0.009901	75	36	0.48	SNP	5.92731	2
S3639-THY-resent_vs_S3639-LIVER-resent	chr5	31999812	31999812	C	G	Bre	c.792-1549C>G	intron_variant	MODIFIER	transcript	36	1	0.028	49	25	0.51	SNP	6.19944	2
S3673-THY-resent_vs_S3673-TAIL-resent	chr5	31999812	31999812	C	G	Bre	c.792-1549C>G	intron_variant	MODIFIER	transcript	68	1	0.015	46	12	0.261	SNP	4.19787	2
S3635-THY-resent_vs_S3635-LIVER	chr1	134101655	134101655	C	G	Btg2-Chit1	n.134101655C>G	intergenic_region	MODIFIER	intergenic_region	74	1	0.014	91	30	0.33	SNP	5.8385	2
S3639-THY-resent_vs_S3639-LIVER-resent	chr1	134101655	134101655	C	G	Btg2-Chit1	n.134101655C>G	intergenic_region	MODIFIER	intergenic_region	56	1	0.018	90	47	0.523	SNP	5.82414	2
S3639-THY-resent_vs_S3639-LIVER-resent	chr5	64556219	64556219	C	G	C030018K13Rik-Gm3716	n.64556219C>G	intergenic_region	MODIFIER	intergenic_region	57	1	0.018	89	50	0.562	SNP	6.03005	2
S3669-THY_vs_S3669-TAIL	chr5	64556219	64556219	C	G	C030018K13Rik-Gm3716	n.64556219C>G	intergenic_region	MODIFIER	intergenic_region	86	0	0	95	45	0.474	SNP	6.14828	2
S3666-THY_vs_S3666-TAIL-resent	chr1	86377509	86377509	G	C	C130036L24Rik-Nmur1	n.86377509G>C	intergenic_region	MODIFIER	intergenic_region	95	0	0	104	45	0.433	SNP	5.98549	2
S3673-THY-resent_vs_S3673-TAIL-resent	chr1	86377509	86377509	G	C	C130036L24Rik-Nmur1	n.86377509G>C	intergenic_region	MODIFIER	intergenic_region	80	0	0	91	41	0.461	SNP	5.78562	2
S3666-THY_vs_S3666-TAIL-resent	chr6	34755916	34755916	C	G	Cald1	c.1008+18C>G	intron_variant	MODIFIER	transcript	94	0	0	91	29	0.322	SNP	5.9452	2
S3669-THY_vs_S3669-TAIL	chr6	34755916	34755916	C	G	Cald1	c.1008+18C>G	intron_variant	MODIFIER	transcript	77	0	0	85	21	0.247	SNP	5.86605	2
S3666-THY_vs_S3666-TAIL-resent	chr6	140389470	140389470	C	G	Capza3-Plekha5	n.140389470C>G	intergenic_region	MODIFIER	intergenic_region	89	0	0	92	33	0.352	SNP	6.27562	2
S3669-THY_vs_S3669-TAIL	chr6	140389470	140389470	C	G	Capza3-Plekha5	n.140389470C>G	intergenic_region	MODIFIER	intergenic_region	91	0	0	63	23	0.365	SNP	7.07761	2
S3635-THY-resent_vs_S3635-LIVER	chr6	145192068	145192068	C	G	Casc1	c.687-374G>C	intron_variant	MODIFIER	transcript	51	1	0.02	61	18	0.295	SNP	4.1529	2
S3669-THY_vs_S3669-TAIL	chr6	145192068	145192068	C	G	Casc1	c.687-374G>C	intron_variant	MODIFIER	transcript	89	1	0.011	88	38	0.425	SNP	5.95704	2
S3669-THY_vs_S3669-TAIL	chr7	145159651	145159651	C	G	Ccnd1-Tpcn2	n.145159651C>G	intergenic_region	MODIFIER	intergenic_region	81	0	0	92	44	0.467	SNP	5.85812	2
S3673-THY-resent_vs_S3673-TAIL-resent	chr7	145159651	145159651	C	G	Ccnd1-Tpcn2	n.145159651C>G	intergenic_region	MODIFIER	intergenic_region	89	0	0	65	14	0.215	SNP	5.63513	2
S3642-THY_vs_S3642-LIVER-resent	chr7	126416606	126416606	G	C	Cd19	c.-1770C>G	upstream_gene_variant	MODIFIER	transcript	88	1	0.011	72	16	0.222	SNP	4.96148	2
S3673-THY-resent_vs_S3673-TAIL-resent	chr7	126416606	126416606	G	C	Cd19	c.-1770C>G	upstream_gene_variant	MODIFIER	transcript	99	0	0	85	48	0.565	SNP	5.84031	2
S3635-THY-resent_vs_S3635-LIVER	chr2	93443512	93443512	G	C	Cd82	c.-96-68C>G	intron_variant	MODIFIER	transcript	69	0	0	66	23	0.348	SNP	5.99781	2
S3666-THY_vs_S3666-TAIL-resent	chr2	93443512	93443512	G	C	Cd82	c.-96-68C>G	intron_variant	MODIFIER	transcript	120	0	0	81	35	0.432	SNP	6.03846	2
S3666-THY_vs_S3666-TAIL-resent	chr6	71333808	71333808	C	G	Cd8b1	c.593-282C>G	intron_variant	MODIFIER	transcript	93	0	0	100	24	0.242	SNP	5.96922	2
S3669-THY_vs_S3669-TAIL	chr6	71333808	71333808	C	G	Cd8b1	c.593-282C>G	intron_variant	MODIFIER	transcript	76	1	0.013	105	51	0.481	SNP	6.1	2
S3637-THY_vs_S3637-LIVER	chr15	23927095	23927095	C	G	Cdh18-Basp1	n.23927095C>G	intergenic_region	MODIFIER	intergenic_region	61	1	0.017	87	41	0.471	SNP	6.14856	2
S3639-THY-resent_vs_S3639-LIVER-resent	chr15	23927095	23927095	C	G	Cdh18-Basp1	n.23927095C>G	intergenic_region	MODIFIER	intergenic_region	46	0	0	75	44	0.587	SNP	6.26173	2
S3669-THY_vs_S3669-TAIL	chr5	3152859	3152859	C	G	CHR_START-Cdk6	n.3152859C>G	intergenic_region	MODIFIER	intergenic_region	85	1	0.012	87	35	0.388	SNP	5.90986	2
S3673-THY-resent_vs_S3673-TAIL-resent	chr5	3152859	3152859	C	G	CHR_START-Cdk6	n.3152859C>G	intergenic_region	MODIFIER	intergenic_region	96	0	0	100	20	0.2	SNP	6.14698	2
S3669-THY_vs_S3669-TAIL	chr7	66174174	66174174	C	G	Chsy1	c.*1753C>G	downstream_gene_variant	MODIFIER	transcript	75	0	0	96	43	0.453	SNP	6.10188	2
S3673-THY-resent_vs_S3673-TAIL-resent	chr7	66174174	66174174	C	G	Chsy1	c.*1753C>G	downstream_gene_variant	MODIFIER	transcript	82	0	0	104	27	0.26	SNP	5.97179	2
S3639-THY-resent_vs_S3639-LIVER-resent	chr12	104869102	104869102	G	C	Clmn	c.-4151C>G	upstream_gene_variant	MODIFIER	transcript	40	0	0	66	15	0.227	SNP	3.07034	2
S3673-THY-resent_vs_S3673-TAIL-resent	chr12	104869102	104869102	G	C	Clmn	c.-4151C>G	upstream_gene_variant	MODIFIER	transcript	61	0	0	50	21	0.42	SNP	6.18645	2
S3642-THY_vs_S3642-LIVER-resent	chr9	10698646	10698646	C	G	Cntn5	c.-210-57824G>C	intron_variant	MODIFIER	transcript	62	1	0.016	61	21	0.344	SNP	5.77277	2
S3666-THY_vs_S3666-TAIL-resent	chr9	10698646	10698646	C	G	Cntn5	c.-210-57824G>C	intron_variant	MODIFIER	transcript	80	0	0	67	20	0.299	SNP	6.07341	2
S3600-THY_vs_S3600-LIVER-resent	chr18	47011654	47011654	C	G	Commd10	c.510+21065C>G	intron_variant	MODIFIER	transcript	95	0	0	105	57	0.538	SNP	6.13808	2
S3635-THY-resent_vs_S3635-LIVER	chr18	47011654	47011654	C	G	Commd10	c.510+21065C>G	intron_variant	MODIFIER	transcript	72	0	0	55	15	0.273	SNP	5.99146	2
S3600-THY_vs_S3600-LIVER-resent	chr7	44968214	44968214	C	G	Cpt1c	c.694-1082G>C	intron_variant	MODIFIER	transcript	74	1	0.014	101	49	0.485	SNP	5.91039	2
S3673-THY-resent_vs_S3673-TAIL-resent	chr7	44968214	44968214	C	G	Cpt1c	c.694-1082G>C	intron_variant	MODIFIER	transcript	60	0	0	34	8	0.235	SNP	3.78753	2
S3666-THY_vs_S3666-TAIL-resent	chr2	149752872	149752872	C	G	Cst10-Syndig1	n.149752872C>G	intergenic_region	MODIFIER	intergenic_region	109	0	0	74	24	0.324	SNP	6.28921	2
S3673-THY-resent_vs_S3673-TAIL-resent	chr2	149752872	149752872	C	G	Cst10-Syndig1	n.149752872C>G	intergenic_region	MODIFIER	intergenic_region	97	0	0	60	14	0.237	SNP	6.30372	2
S3642-THY_vs_S3642-LIVER-resent	chr2	150581758	150581758	G	C	Cst7	c.*3261G>C	downstream_gene_variant	MODIFIER	transcript	97	1	0.01	87	18	0.209	SNP	5.10792	2
S3666-THY_vs_S3666-TAIL-resent	chr2	150581758	150581758	G	C	Cst7	c.*3261G>C	downstream_gene_variant	MODIFIER	transcript	116	0	0	86	31	0.365	SNP	6.25346	2
S3635-THY-resent_vs_S3635-LIVER	chrX	66147382	66147382	C	G	Ctag2-Slitrk2	n.66147382C>G	intergenic_region	MODIFIER	intergenic_region	62	1	0.016	65	21	0.328	SNP	5.68512	2
S3642-THY_vs_S3642-LIVER-resent	chrX	66147382	66147382	C	G	Ctag2-Slitrk2	n.66147382C>G	intergenic_region	MODIFIER	intergenic_region	60	1	0.017	77	30	0.39	SNP	6.12598	2
S3666-THY_vs_S3666-TAIL-resent	chr13	61187774	61187774	C	G	Ctsr-Cts6	n.61187774C>G	intergenic_region	MODIFIER	intergenic_region	81	0	0	79	22	0.278	SNP	5.96303	2
S3669-THY_vs_S3669-TAIL	chr13	61187774	61187774	C	G	Ctsr-Cts6	n.61187774C>G	intergenic_region	MODIFIER	intergenic_region	43	0	0	100	43	0.43	SNP	6.18614	2
S3635-THY-resent_vs_S3635-LIVER	chr5	121965164	121965164	C	G	Cux2	c.-123-40249G>C	intron_variant	MODIFIER	transcript	75	1	0.014	70	40	0.565	SNP	5.99541	2
S3642-THY_vs_S3642-LIVER-resent	chr5	121965164	121965164	C	G	Cux2	c.-123-40249G>C	intron_variant	MODIFIER	transcript	89	0	0	76	19	0.25	SNP	6.99659	2
S3600-THY_vs_S3600-LIVER-resent	chr15	61721211	61721211	G	C	D030024E09Rik	n.165-10343C>G	intron_variant	MODIFIER	transcript	105	0	0	118	59	0.504	SNP	5.80061	2
S3669-THY_vs_S3669-TAIL	chr15	61721211	61721211	G	C	D030024E09Rik	n.165-10343C>G	intron_variant	MODIFIER	transcript	82	0	0	80	22	0.275	SNP	5.9527	2
S3666-THY_vs_S3666-TAIL-resent	chr10	83414584	83414584	G	C	D10Wsu102e-Aldh1l2	n.83414584G>C	intergenic_region	MODIFIER	intergenic_region	70	0	0	85	22	0.259	SNP	6.25288	2
S3673-THY-resent_vs_S3673-TAIL-resent	chr10	83414584	83414584	G	C	D10Wsu102e-Aldh1l2	n.83414584G>C	intergenic_region	MODIFIER	intergenic_region	84	0	0	79	16	0.203	SNP	5.41023	2
S3600-THY_vs_S3600-LIVER-resent	chr12	71970055	71970055	C	G	Daam1	c.2103-1039C>G	intron_variant	MODIFIER	transcript	102	0	0	109	55	0.509	SNP	5.79642	2
S3669-THY_vs_S3669-TAIL	chr12	71970055	71970055	C	G	Daam1	c.2103-1039C>G	intron_variant	MODIFIER	transcript	79	1	0.013	92	40	0.44	SNP	6.25822	2
S3635-THY-resent_vs_S3635-LIVER	chr14	97881515	97881515	G	C	Dach1	c.1705+19786C>G	intron_variant	MODIFIER	transcript	79	1	0.013	49	18	0.362	SNP	6.02023	2
S3666-THY_vs_S3666-TAIL-resent	chr14	97881515	97881515	G	C	Dach1	c.1705+19786C>G	intron_variant	MODIFIER	transcript	92	0	0	96	23	0.232	SNP	6.28352	2
S3600-THY_vs_S3600-LIVER-resent	chr13	25051596	25051596	G	C	Dcdc2a	c.-4675G>C	upstream_gene_variant	MODIFIER	transcript	58	0	0	118	59	0.5	SNP	5.86594	2
S3639-THY-resent_vs_S3639-LIVER-resent	chr13	25051596	25051596	G	C	Dcdc2a	c.-4675G>C	upstream_gene_variant	MODIFIER	transcript	60	1	0.017	76	36	0.474	SNP	5.81496	2
S3635-THY-resent_vs_S3635-LIVER	chr8	125207233	125207233	G	C	Disc1	c.1973-10864G>C	intron_variant	MODIFIER	transcript	77	1	0.013	66	39	0.6	SNP	6.2553	2
S3666-THY_vs_S3666-TAIL-resent	chr8	125207233	125207233	G	C	Disc1	c.1973-10864G>C	intron_variant	MODIFIER	transcript	92	0	0	96	33	0.347	SNP	6.26634	2
S3635-THY-resent_vs_S3635-LIVER	chr19	25745837	25745837	G	C	Dmrt2-Smarca2	n.25745837G>C	intergenic_region	MODIFIER	intergenic_region	64	1	0.016	48	26	0.542	SNP	6.10282	2
S3666-THY_vs_S3666-TAIL-resent	chr19	25745837	25745837	G	C	Dmrt2-Smarca2	n.25745837G>C	intergenic_region	MODIFIER	intergenic_region	81	0	0	87	26	0.299	SNP	6.26261	2
S3600-THY_vs_S3600-LIVER-resent	chr12	117905463	117905463	C	G	Dnah11	c.12112-2170G>C	intron_variant	MODIFIER	transcript	50	0	0	93	40	0.43	SNP	5.93982	2
S3673-THY-resent_vs_S3673-TAIL-resent	chr12	117905463	117905463	C	G	Dnah11	c.12112-2170G>C	intron_variant	MODIFIER	transcript	84	0	0	61	20	0.328	SNP	6.83705	2
S3666-THY_vs_S3666-TAIL-resent	chr12	40875015	40875015	G	C	Dock4-Immp2l	n.40875015G>C	intergenic_region	MODIFIER	intergenic_region	100	0	0	94	37	0.398	SNP	5.66331	2
S3673-THY-resent_vs_S3673-TAIL-resent	chr12	40875015	40875015	G	C	Dock4-Immp2l	n.40875015G>C	intergenic_region	MODIFIER	intergenic_region	97	1	0.011	79	16	0.203	SNP	4.93921	2
S3666-THY_vs_S3666-TAIL-resent	chr18	90201771	90201771	C	G	Dok6-Tmx3	n.90201771C>G	intergenic_region	MODIFIER	intergenic_region	113	0	0	86	29	0.337	SNP	6.13813	2
S3673-THY-resent_vs_S3673-TAIL-resent	chr18	90201771	90201771	C	G	Dok6-Tmx3	n.90201771C>G	intergenic_region	MODIFIER	intergenic_region	106	1	0.009615	55	22	0.4	SNP	6.45287	2
S3666-THY_vs_S3666-TAIL-resent	chr1	111938551	111938551	C	G	Dsel-Cntnap5a	n.111938551C>G	intergenic_region	MODIFIER	intergenic_region	82	0	0	106	33	0.314	SNP	5.87753	2
S3669-THY_vs_S3669-TAIL	chr1	111938551	111938551	C	G	Dsel-Cntnap5a	n.111938551C>G	intergenic_region	MODIFIER	intergenic_region	63	0	0	84	20	0.238	SNP	5.06502	2
S3666-THY_vs_S3666-TAIL-resent	chr14	67241499	67241499	G	C	Ebf2	c.482+2008G>C	intron_variant	MODIFIER	transcript	85	0	0	72	29	0.403	SNP	5.73295	2
S3673-THY-resent_vs_S3673-TAIL-resent	chr14	67241499	67241499	G	C	Ebf2	c.482+2008G>C	intron_variant	MODIFIER	transcript	82	0	0	49	15	0.304	SNP	7.08343	2
S3635-THY-resent_vs_S3635-LIVER	chr1	87257780	87257780	G	C	Eif4e2-Efhd1	n.87257780G>C	intergenic_region	MODIFIER	intergenic_region	43	1	0.023	57	14	0.246	SNP	2.78469	2
S3642-THY_vs_S3642-LIVER-resent	chr1	87257780	87257780	G	C	Eif4e2-Efhd1	n.87257780G>C	intergenic_region	MODIFIER	intergenic_region	71	1	0.014	66	18	0.273	SNP	5.17329	2
S3635-THY-resent_vs_S3635-LIVER	chr16	95567125	95567125	C	G	Erg	n.95567125G>C	intragenic_variant	MODIFIER	gene_variant	59	1	0.017	59	19	0.31	SNP	5.07853	2
S3637-THY_vs_S3637-LIVER	chr16	95567125	95567125	C	G	Erg	n.95567125G>C	intragenic_variant	MODIFIER	gene_variant	54	1	0.019	113	49	0.44	SNP	5.85196	2
S3600-THY_vs_S3600-LIVER-resent	chr11	18008044	18008044	G	C	Etaa1os-Gm12018	n.18008044G>C	intergenic_region	MODIFIER	intergenic_region	66	0	0	98	46	0.469	SNP	6.04554	2
S3669-THY_vs_S3669-TAIL	chr11	18008044	18008044	G	C	Etaa1os-Gm12018	n.18008044G>C	intergenic_region	MODIFIER	intergenic_region	78	0	0	80	33	0.413	SNP	5.98283	2
S3600-THY_vs_S3600-LIVER-resent	chr2	20598028	20598028	G	C	Etl4	c.508-63870G>C	intron_variant	MODIFIER	transcript	57	1	0.018	99	59	0.596	SNP	5.90318	2
S3642-THY_vs_S3642-LIVER-resent	chr2	20598028	20598028	G	C	Etl4	c.508-63870G>C	intron_variant	MODIFIER	transcript	94	0	0	92	31	0.337	SNP	6.15853	2
S3642-THY_vs_S3642-LIVER-resent	chr6	143238929	143238929	G	C	Etnk1-D6Ertd474e	n.143238929G>C	intergenic_region	MODIFIER	intergenic_region	109	1	0.009346	96	27	0.277	SNP	6.1089	2
S3666-THY_vs_S3666-TAIL-resent	chr6	143238929	143238929	G	C	Etnk1-D6Ertd474e	n.143238929G>C	intergenic_region	MODIFIER	intergenic_region	93	0	0	94	45	0.479	SNP	6.06675	2
S3669-THY_vs_S3669-TAIL	chr16	22411310	22411310	C	G	Etv5	c.650+323G>C	intron_variant	MODIFIER	transcript	83	0	0	86	45	0.518	SNP	5.8287	2
S3673-THY-resent_vs_S3673-TAIL-resent	chr16	22411310	22411310	C	G	Etv5	c.650+323G>C	intron_variant	MODIFIER	transcript	101	0	0	84	42	0.494	SNP	5.98712	2
S3635-THY-resent_vs_S3635-LIVER	chr8	45255068	45255068	C	G	F11	c.218+136G>C	intron_variant	MODIFIER	transcript	68	0	0	63	16	0.254	SNP	5.57726	2
S3639-THY-resent_vs_S3639-LIVER-resent	chr8	45255068	45255068	C	G	F11	c.218+136G>C	intron_variant	MODIFIER	transcript	75	0	0	54	31	0.574	SNP	6.18703	2
S3635-THY-resent_vs_S3635-LIVER	chr1	75150032	75150032	C	G	Fam134a	c.*2977C>G	downstream_gene_variant	MODIFIER	transcript	65	1	0.015	62	28	0.443	SNP	6.45662	2
S3669-THY_vs_S3669-TAIL	chr1	75150032	75150032	C	G	Fam134a	c.*2977C>G	downstream_gene_variant	MODIFIER	transcript	73	0	0	88	29	0.322	SNP	6.07482	2
S3635-THY-resent_vs_S3635-LIVER	chr5	107922331	107922331	C	G	Fam69a	c.189+2254G>C	intron_variant	MODIFIER	transcript	57	0	0	68	36	0.529	SNP	6.05342	2
S3673-THY-resent_vs_S3673-TAIL-resent	chr5	107922331	107922331	C	G	Fam69a	c.189+2254G>C	intron_variant	MODIFIER	transcript	93	0	0	79	17	0.218	SNP	6.19531	2
S3600-THY_vs_S3600-LIVER-resent	chr3	40440196	40440196	C	G	Fat4-1700017G19Rik	n.40440196C>G	intergenic_region	MODIFIER	intergenic_region	80	0	0	107	55	0.514	SNP	6.13432	2
S3666-THY_vs_S3666-TAIL-resent	chr3	40440196	40440196	C	G	Fat4-1700017G19Rik	n.40440196C>G	intergenic_region	MODIFIER	intergenic_region	99	0	0	107	35	0.34	SNP	5.88151	2
S3600-THY_vs_S3600-LIVER-resent	chr13	114500397	114500397	G	C	Fst-4930544M13Rik	n.114500397G>C	intergenic_region	MODIFIER	intergenic_region	89	0	0	92	44	0.484	SNP	6.21346	2
S3666-THY_vs_S3666-TAIL-resent	chr13	114500397	114500397	G	C	Fst-4930544M13Rik	n.114500397G>C	intergenic_region	MODIFIER	intergenic_region	96	0	0	85	28	0.329	SNP	6.19153	2
S3635-THY-resent_vs_S3635-LIVER	chr4	46816579	46816579	G	C	Gabbr2	c.628-840C>G	intron_variant	MODIFIER	transcript	58	0	0	84	22	0.262	SNP	5.27414	2
S3666-THY_vs_S3666-TAIL-resent	chr4	46816579	46816579	G	C	Gabbr2	c.628-840C>G	intron_variant	MODIFIER	transcript	86	0	0	85	31	0.365	SNP	6.26461	2
S3666-THY_vs_S3666-TAIL-resent	chr4	155388385	155388385	G	C	Gabrd	c.340C>G	missense_variant	MODERATE	transcript	91	0	0	98	27	0.278	SNP	6.51611	2
S3673-THY-resent_vs_S3673-TAIL-resent	chr4	155388385	155388385	G	C	Gabrd	c.340C>G	missense_variant	MODERATE	transcript	91	1	0.011	73	35	0.486	SNP	6.02013	2
S3666-THY_vs_S3666-TAIL-resent	chr2	125864506	125864506	G	C	Galk2	c.-1827G>C	upstream_gene_variant	MODIFIER	transcript	88	0	0	87	34	0.4	SNP	6.21455	2
S3669-THY_vs_S3669-TAIL	chr2	125864506	125864506	G	C	Galk2	c.-1827G>C	upstream_gene_variant	MODIFIER	transcript	72	0	0	83	48	0.578	SNP	6.21892	2
S3639-THY-resent_vs_S3639-LIVER-resent	chr6	54987263	54987263	G	C	Ggct	c.288-295C>G	intron_variant	MODIFIER	transcript	57	1	0.018	71	42	0.58	SNP	6.26339	2
S3673-THY-resent_vs_S3673-TAIL-resent	chr6	54987263	54987263	G	C	Ggct	c.288-295C>G	intron_variant	MODIFIER	transcript	72	1	0.014	70	34	0.493	SNP	5.84163	2
S3639-THY-resent_vs_S3639-LIVER-resent	chr13	118708062	118708062	G	C	Gm10732-Fgf10	n.118708062G>C	intergenic_region	MODIFIER	intergenic_region	51	0	0	60	30	0.5	SNP	6.63233	2
S3673-THY-resent_vs_S3673-TAIL-resent	chr13	118708062	118708062	G	C	Gm10732-Fgf10	n.118708062G>C	intergenic_region	MODIFIER	intergenic_region	78	1	0.013	70	20	0.286	SNP	5.95358	2
S3639-THY-resent_vs_S3639-LIVER-resent	chr10	97953827	97953827	C	G	Gm10754	n.102+13162G>C	intron_variant	MODIFIER	transcript	80	1	0.013	82	33	0.395	SNP	6.29109	2
S3666-THY_vs_S3666-TAIL-resent	chr10	97953827	97953827	C	G	Gm10754	n.102+13162G>C	intron_variant	MODIFIER	transcript	91	1	0.011	96	33	0.344	SNP	6.00563	2
S3669-THY_vs_S3669-TAIL	chr10	82577594	82577594	C	G	Gm1553-1190007I07Rik	n.82577594C>G	intergenic_region	MODIFIER	intergenic_region	88	0	0	87	34	0.391	SNP	6.21455	2
S3673-THY-resent_vs_S3673-TAIL-resent	chr10	82577594	82577594	C	G	Gm1553-1190007I07Rik	n.82577594C>G	intergenic_region	MODIFIER	intergenic_region	90	1	0.011	85	43	0.518	SNP	6.29707	2
S3642-THY_vs_S3642-LIVER-resent	chr5	104072174	104072174	C	G	Gm17660	c.226-77G>C	intron_variant	MODIFIER	transcript	71	1	0.014	52	13	0.25	SNP	4.31376	2
S3673-THY-resent_vs_S3673-TAIL-resent	chr5	104072174	104072174	C	G	Gm17660	c.226-77G>C	intron_variant	MODIFIER	transcript	55	0	0	72	36	0.514	SNP	5.99054	2
S3600-THY_vs_S3600-LIVER-resent	chr3	74735036	74735036	C	G	Gm20356-Zbbx	n.74735036C>G	intergenic_region	MODIFIER	intergenic_region	63	0	0	89	49	0.551	SNP	6.36667	2
S3635-THY-resent_vs_S3635-LIVER	chr3	74735036	74735036	C	G	Gm20356-Zbbx	n.74735036C>G	intergenic_region	MODIFIER	intergenic_region	74	1	0.014	48	12	0.234	SNP	4.31251	2
S3635-THY-resent_vs_S3635-LIVER	chr12	12837046	12837046	G	C	Gm34637-Mycn	n.12837046G>C	intergenic_region	MODIFIER	intergenic_region	43	1	0.023	51	31	0.608	SNP	6.1063	2
S3673-THY-resent_vs_S3673-TAIL-resent	chr12	12837046	12837046	G	C	Gm34637-Mycn	n.12837046G>C	intergenic_region	MODIFIER	intergenic_region	61	1	0.016	40	14	0.35	SNP	5.31041	2
S3639-THY-resent_vs_S3639-LIVER-resent	chr12	98530506	98530506	G	C	Gm40893	n.*3923G>C	downstream_gene_variant	MODIFIER	transcript	61	1	0.017	89	35	0.398	SNP	6.40651	2
S3673-THY-resent_vs_S3673-TAIL-resent	chr12	98530506	98530506	G	C	Gm40893	n.*3923G>C	downstream_gene_variant	MODIFIER	transcript	90	1	0.011	79	17	0.215	SNP	4.83666	2
S3669-THY_vs_S3669-TAIL	chr14	71823349	71823349	G	C	Gm4251-4930434J06Rik	n.71823349G>C	intergenic_region	MODIFIER	intergenic_region	99	0	0	98	37	0.381	SNP	6.08696	2
S3673-THY-resent_vs_S3673-TAIL-resent	chr14	71823349	71823349	G	C	Gm4251-4930434J06Rik	n.71823349G>C	intergenic_region	MODIFIER	intergenic_region	90	0	0	77	16	0.211	SNP	5.78486	2
S3639-THY-resent_vs_S3639-LIVER-resent	chr12	22591217	22591217	C	G	Gm4425-2410018L13Rik	n.22591217C>G	intergenic_region	MODIFIER	intergenic_region	63	0	0	74	44	0.595	SNP	5.97753	2
S3673-THY-resent_vs_S3673-TAIL-resent	chr12	22591217	22591217	C	G	Gm4425-2410018L13Rik	n.22591217C>G	intergenic_region	MODIFIER	intergenic_region	96	1	0.011	70	14	0.2	SNP	4.61708	2
S3666-THY_vs_S3666-TAIL-resent	chr8	44139413	44139413	G	C	Gm5347-Fat1	n.44139413G>C	intergenic_region	MODIFIER	intergenic_region	74	0	0	86	30	0.349	SNP	6.042	2
S3669-THY_vs_S3669-TAIL	chr8	44139413	44139413	G	C	Gm5347-Fat1	n.44139413G>C	intergenic_region	MODIFIER	intergenic_region	56	0	0	72	35	0.486	SNP	6.18684	2
S3666-THY_vs_S3666-TAIL-resent	chrX	48857268	48857268	G	C	Gm595	c.1123+207C>G	intron_variant	MODIFIER	transcript	91	0	0	74	26	0.356	SNP	5.78346	2
S3673-THY-resent_vs_S3673-TAIL-resent	chrX	48857268	48857268	G	C	Gm595	c.1123+207C>G	intron_variant	MODIFIER	transcript	103	0	0	52	30	0.577	SNP	5.79013	2
S3635-THY-resent_vs_S3635-LIVER	chr17	45607420	45607420	C	G	Gm7325-Capn11	n.45607420C>G	intergenic_region	MODIFIER	intergenic_region	83	0	0	79	16	0.208	SNP	5.36536	2
S3639-THY-resent_vs_S3639-LIVER-resent	chr17	45607420	45607420	C	G	Gm7325-Capn11	n.45607420C>G	intergenic_region	MODIFIER	intergenic_region	79	1	0.013	93	46	0.495	SNP	6.04535	2
S3642-THY_vs_S3642-LIVER-resent	chr4	152988145	152988145	G	C	Gm833-Ajap1	n.152988145G>C	intergenic_region	MODIFIER	intergenic_region	67	1	0.015	77	23	0.303	SNP	5.72478	2
S3666-THY_vs_S3666-TAIL-resent	chr4	152988145	152988145	G	C	Gm833-Ajap1	n.152988145G>C	intergenic_region	MODIFIER	intergenic_region	60	0	0	100	37	0.374	SNP	5.87	2
S3600-THY_vs_S3600-LIVER-resent	chr19	16441467	16441467	G	C	Gna14	c.124+4650G>C	intron_variant	MODIFIER	transcript	72	0	0	83	36	0.434	SNP	6.11313	2
S3669-THY_vs_S3669-TAIL	chr19	16441467	16441467	G	C	Gna14	c.124+4650G>C	intron_variant	MODIFIER	transcript	71	0	0	74	27	0.365	SNP	6.11821	2
S3600-THY_vs_S3600-LIVER-resent	chr9	107616482	107616482	C	G	Gnai2	c.655G>C	missense_variant	MODERATE	transcript	95	0	0	110	26	0.236	SNP	6.09903	2
S3669-THY_vs_S3669-TAIL	chr9	107616482	107616482	C	G	Gnai2	c.655G>C	missense_variant	MODERATE	transcript	73	0	0	89	47	0.528	SNP	6.21708	2
S3666-THY_vs_S3666-TAIL-resent	chr5	137537824	137537824	C	G	Gnb2	c.-7073G>C	upstream_gene_variant	MODIFIER	transcript	99	0	0	99	27	0.273	SNP	5.8944	2
S3669-THY_vs_S3669-TAIL	chr5	137537824	137537824	C	G	Gnb2	c.-7073G>C	upstream_gene_variant	MODIFIER	transcript	84	1	0.012	90	49	0.544	SNP	6.15742	2
S3666-THY_vs_S3666-TAIL-resent	chr17	57235882	57235882	G	C	Gpr108	c.1637+41C>G	intron_variant	MODIFIER	transcript	108	0	0	78	28	0.368	SNP	6.41544	2
S3673-THY-resent_vs_S3673-TAIL-resent	chr17	57235882	57235882	G	C	Gpr108	c.1637+41C>G	intron_variant	MODIFIER	transcript	72	1	0.014	98	28	0.289	SNP	5.73743	2
S3600-THY_vs_S3600-LIVER-resent	chr6	136246412	136246412	C	G	Grin2b-Gm8994	n.136246412C>G	intergenic_region	MODIFIER	intergenic_region	77	0	0	127	66	0.512	SNP	5.92972	2
S3669-THY_vs_S3669-TAIL	chr6	136246412	136246412	C	G	Grin2b-Gm8994	n.136246412C>G	intergenic_region	MODIFIER	intergenic_region	88	0	0	105	49	0.467	SNP	5.71037	2
S3666-THY_vs_S3666-TAIL-resent	chr5	34747007	34747007	C	G	Grk4	c.1267-1172C>G	intron_variant	MODIFIER	transcript	95	0	0	101	29	0.287	SNP	5.98746	2
S3669-THY_vs_S3669-TAIL	chr5	34747007	34747007	C	G	Grk4	c.1267-1172C>G	intron_variant	MODIFIER	transcript	81	1	0.013	86	36	0.419	SNP	5.85334	2
S3600-THY_vs_S3600-LIVER-resent	chr13	14346794	14346794	G	C	Hecw1	c.556-699C>G	intron_variant	MODIFIER	transcript	55	0	0	86	33	0.384	SNP	5.90074	2
S3635-THY-resent_vs_S3635-LIVER	chr13	14346794	14346794	G	C	Hecw1	c.556-699C>G	intron_variant	MODIFIER	transcript	62	1	0.017	52	27	0.51	SNP	5.79669	2
S3642-THY_vs_S3642-LIVER-resent	chr11	75174552	75174552	G	C	Hic1	c.-5033C>G	upstream_gene_variant	MODIFIER	transcript	95	1	0.011	67	18	0.258	SNP	6.45789	2
S3666-THY_vs_S3666-TAIL-resent	chr11	75174552	75174552	G	C	Hic1	c.-5033C>G	upstream_gene_variant	MODIFIER	transcript	105	0	0	85	25	0.294	SNP	6.58952	2
S3639-THY-resent_vs_S3639-LIVER-resent	chr9	56487444	56487444	C	G	Hmg20a	c.613-172C>G	intron_variant	MODIFIER	transcript	45	0	0	75	36	0.473	SNP	6.04612	2
S3673-THY-resent_vs_S3673-TAIL-resent	chr9	56487444	56487444	C	G	Hmg20a	c.613-172C>G	intron_variant	MODIFIER	transcript	99	0	0	72	18	0.25	SNP	7.36769	2
S3666-THY_vs_S3666-TAIL-resent	chr17	27554259	27554259	G	C	Hmga1	c.-5310G>C	upstream_gene_variant	MODIFIER	transcript	86	0	0	94	20	0.213	SNP	6.05754	2
S3673-THY-resent_vs_S3673-TAIL-resent	chr17	27554259	27554259	G	C	Hmga1	c.-5310G>C	upstream_gene_variant	MODIFIER	transcript	99	0	0	94	22	0.234	SNP	5.95536	2
S3666-THY_vs_S3666-TAIL-resent	chr11	96344393	96344393	C	G	Hoxb3	c.145C>G	missense_variant	MODERATE	transcript	90	0	0	124	46	0.366	SNP	5.90872	2
S3673-THY-resent_vs_S3673-TAIL-resent	chr11	96344393	96344393	C	G	Hoxb3	c.145C>G	missense_variant	MODERATE	transcript	92	1	0.011	104	41	0.402	SNP	5.90977	2
S3639-THY-resent_vs_S3639-LIVER-resent	chr13	105946205	105946205	C	G	Htr1a-Ipo11	n.105946205C>G	intergenic_region	MODIFIER	intergenic_region	71	0	0	52	22	0.423	SNP	6.54481	2
S3669-THY_vs_S3669-TAIL	chr13	105946205	105946205	C	G	Htr1a-Ipo11	n.105946205C>G	intergenic_region	MODIFIER	intergenic_region	83	0	0	74	24	0.329	SNP	5.97138	2
S3639-THY-resent_vs_S3639-LIVER-resent	chrX	151970925	151970925	G	C	Huwe1-Hsd17b10	n.151970925G>C	intergenic_region	MODIFIER	intergenic_region	47	0	0	51	15	0.294	SNP	4.66624	2
S3666-THY_vs_S3666-TAIL-resent	chrX	151970925	151970925	G	C	Huwe1-Hsd17b10	n.151970925G>C	intergenic_region	MODIFIER	intergenic_region	90	0	0	82	24	0.296	SNP	5.96502	2
S3669-THY_vs_S3669-TAIL	chr6	138718689	138718689	G	C	Igbp1b-4922502N22Rik	n.138718689G>C	intergenic_region	MODIFIER	intergenic_region	60	0	0	89	28	0.315	SNP	6.11972	2
S3673-THY-resent_vs_S3673-TAIL-resent	chr6	138718689	138718689	G	C	Igbp1b-4922502N22Rik	n.138718689G>C	intergenic_region	MODIFIER	intergenic_region	74	1	0.014	73	33	0.452	SNP	6.46348	2
S3639-THY-resent_vs_S3639-LIVER-resent	chr7	68140996	68140996	G	C	Igf1r	c.641-23997G>C	intron_variant	MODIFIER	transcript	65	1	0.016	70	38	0.543	SNP	5.9745	2
S3673-THY-resent_vs_S3673-TAIL-resent	chr7	68140996	68140996	G	C	Igf1r	c.641-23997G>C	intron_variant	MODIFIER	transcript	94	1	0.011	90	44	0.5	SNP	5.69391	2
S3639-THY-resent_vs_S3639-LIVER-resent	chr10	19683053	19683053	C	G	Il22ra2-Il20ra	n.19683053C>G	intergenic_region	MODIFIER	intergenic_region	55	0	0	82	36	0.432	SNP	5.98663	2
S3669-THY_vs_S3669-TAIL	chr10	19683053	19683053	C	G	Il22ra2-Il20ra	n.19683053C>G	intergenic_region	MODIFIER	intergenic_region	65	0	0	92	40	0.429	SNP	5.77931	2
S3666-THY_vs_S3666-TAIL-resent	chr10	118359748	118359748	C	G	Iltifb-Ifng	n.118359748C>G	intergenic_region	MODIFIER	intergenic_region	83	0	0	81	31	0.383	SNP	6.29185	2
S3673-THY-resent_vs_S3673-TAIL-resent	chr10	118359748	118359748	C	G	Iltifb-Ifng	n.118359748C>G	intergenic_region	MODIFIER	intergenic_region	87	1	0.011	66	24	0.369	SNP	6.12787	2
S3600-THY_vs_S3600-LIVER-resent	chr18	24188964	24188964	G	C	Ino80c-Galnt1	n.24188964G>C	intergenic_region	MODIFIER	intergenic_region	95	0	0	132	51	0.377	SNP	6.14727	2
S3669-THY_vs_S3669-TAIL	chr18	24188964	24188964	G	C	Ino80c-Galnt1	n.24188964G>C	intergenic_region	MODIFIER	intergenic_region	75	1	0.013	102	37	0.36	SNP	6.26223	2
S3669-THY_vs_S3669-TAIL	chr1	193165215	193165215	C	G	Irf6	c.509-551C>G	intron_variant	MODIFIER	transcript	78	0	0	84	28	0.341	SNP	5.84913	2
S3673-THY-resent_vs_S3673-TAIL-resent	chr1	193165215	193165215	C	G	Irf6	c.509-551C>G	intron_variant	MODIFIER	transcript	100	0	0	89	21	0.227	SNP	5.80837	2
S3639-THY-resent_vs_S3639-LIVER-resent	chr2	167098492	167098492	G	C	Kcnb1	c.*5861C>G	3_prime_UTR_variant	MODIFIER	transcript	57	0	0	75	15	0.203	SNP	3.87399	2
S3666-THY_vs_S3666-TAIL-resent	chr2	167098492	167098492	G	C	Kcnb1	c.*5861C>G	3_prime_UTR_variant	MODIFIER	transcript	85	0	0	76	22	0.289	SNP	6.26589	2
S3635-THY-resent_vs_S3635-LIVER	chr2	63881488	63881488	G	C	Kcnh7-Fign	n.63881488G>C	intergenic_region	MODIFIER	intergenic_region	62	1	0.016	38	17	0.447	SNP	7.22704	2
S3639-THY-resent_vs_S3639-LIVER-resent	chr2	63881488	63881488	G	C	Kcnh7-Fign	n.63881488G>C	intergenic_region	MODIFIER	intergenic_region	40	1	0.025	40	22	0.55	SNP	6.86845	2
S3600-THY_vs_S3600-LIVER-resent	chr11	111969620	111969620	G	C	Kcnj2-BC006965	n.111969620G>C	intergenic_region	MODIFIER	intergenic_region	30	0	0	45	21	0.467	SNP	5.6191	2
S3669-THY_vs_S3669-TAIL	chr11	111969620	111969620	G	C	Kcnj2-BC006965	n.111969620G>C	intergenic_region	MODIFIER	intergenic_region	64	0	0	65	27	0.422	SNP	6.32398	2
S3639-THY-resent_vs_S3639-LIVER-resent	chr4	138281331	138281331	C	G	Kif17	c.1124-26C>G	intron_variant	MODIFIER	transcript	71	0	0	73	35	0.486	SNP	5.82033	2
S3642-THY_vs_S3642-LIVER-resent	chr4	138281331	138281331	C	G	Kif17	c.1124-26C>G	intron_variant	MODIFIER	transcript	75	1	0.013	83	27	0.325	SNP	5.8838	2
S3635-THY-resent_vs_S3635-LIVER	chr8	95170165	95170165	G	C	Kifc3-Cngb1	n.95170165G>C	intergenic_region	MODIFIER	intergenic_region	59	1	0.017	64	31	0.484	SNP	6.6	2
S3666-THY_vs_S3666-TAIL-resent	chr8	95170165	95170165	G	C	Kifc3-Cngb1	n.95170165G>C	intergenic_region	MODIFIER	intergenic_region	77	0	0	105	38	0.365	SNP	6.22356	2
S3666-THY_vs_S3666-TAIL-resent	chr7	63949820	63949820	C	G	Klf13-Trpm1	n.63949820C>G	intergenic_region	MODIFIER	intergenic_region	94	0	0	104	30	0.291	SNP	6.33619	2
S3669-THY_vs_S3669-TAIL	chr7	63949820	63949820	C	G	Klf13-Trpm1	n.63949820C>G	intergenic_region	MODIFIER	intergenic_region	85	1	0.012	94	50	0.532	SNP	5.99474	2
S3666-THY_vs_S3666-TAIL-resent	chr14	47820580	47820580	G	C	Ktn1-4930447J18Rik	n.47820580G>C	intergenic_region	MODIFIER	intergenic_region	87	0	0	77	34	0.447	SNP	6.32087	2
S3673-THY-resent_vs_S3673-TAIL-resent	chr14	47820580	47820580	G	C	Ktn1-4930447J18Rik	n.47820580G>C	intergenic_region	MODIFIER	intergenic_region	82	1	0.013	97	25	0.26	SNP	5.66653	2
S3666-THY_vs_S3666-TAIL-resent	chr3	142759653	142759653	C	G	Kyat3-Gtf2b	n.142759653C>G	intergenic_region	MODIFIER	intergenic_region	96	0	0	85	31	0.357	SNP	6.176	2
S3669-THY_vs_S3669-TAIL	chr3	142759653	142759653	C	G	Kyat3-Gtf2b	n.142759653C>G	intergenic_region	MODIFIER	intergenic_region	80	0	0	95	37	0.387	SNP	5.82257	2
S3669-THY_vs_S3669-TAIL	chr18	67930523	67930523	G	C	Ldlrad4	c.-134124G>C	upstream_gene_variant	MODIFIER	transcript	86	0	0	92	43	0.467	SNP	5.92894	2
S3673-THY-resent_vs_S3673-TAIL-resent	chr18	67930523	67930523	G	C	Ldlrad4	c.-134124G>C	upstream_gene_variant	MODIFIER	transcript	97	0	0	84	19	0.226	SNP	6.8668	2
S3669-THY_vs_S3669-TAIL	chr4	37004451	37004451	C	G	Lingo2-1700009N14Rik	n.37004451C>G	intergenic_region	MODIFIER	intergenic_region	64	0	0	78	36	0.474	SNP	5.81945	2
S3673-THY-resent_vs_S3673-TAIL-resent	chr4	37004451	37004451	C	G	Lingo2-1700009N14Rik	n.37004451C>G	intergenic_region	MODIFIER	intergenic_region	100	0	0	68	16	0.235	SNP	6.79692	2
S3635-THY-resent_vs_S3635-LIVER	chr16	33077927	33077927	C	G	Lmln	c.696-3004C>G	intron_variant	MODIFIER	transcript	76	1	0.013	65	19	0.297	SNP	5.67126	2
S3642-THY_vs_S3642-LIVER-resent	chr16	33077927	33077927	C	G	Lmln	c.696-3004C>G	intron_variant	MODIFIER	transcript	101	1	0.01	79	36	0.449	SNP	6.31766	2
S3637-THY_vs_S3637-LIVER	chr16	33158458	33158458	C	G	Lmln-Osbpl11	n.33158458C>G	intergenic_region	MODIFIER	intergenic_region	25	0	0	87	34	0.391	SNP	4.41583	2
S3669-THY_vs_S3669-TAIL	chr16	33158458	33158458	C	G	Lmln-Osbpl11	n.33158458C>G	intergenic_region	MODIFIER	intergenic_region	37	0	0	57	23	0.404	SNP	5.58778	2
S3669-THY_vs_S3669-TAIL	chr6	134972541	134972541	C	G	Lockd-Apold1	n.134972541C>G	intergenic_region	MODIFIER	intergenic_region	78	0	0	88	46	0.523	SNP	6.18862	2
S3673-THY-resent_vs_S3673-TAIL-resent	chr6	134972541	134972541	C	G	Lockd-Apold1	n.134972541C>G	intergenic_region	MODIFIER	intergenic_region	86	1	0.012	82	31	0.378	SNP	6.07357	2
S3642-THY_vs_S3642-LIVER-resent	chr16	33008466	33008466	C	G	Lrch3	c.2188-723C>G	intron_variant	MODIFIER	transcript	89	1	0.011	79	23	0.282	SNP	5.93816	2
S3669-THY_vs_S3669-TAIL	chr16	33008466	33008466	C	G	Lrch3	c.2188-723C>G	intron_variant	MODIFIER	transcript	82	0	0	79	39	0.494	SNP	6.02551	2
S3600-THY_vs_S3600-LIVER-resent	chr12	69170317	69170317	G	C	Lrr1	c.207+1255G>C	intron_variant	MODIFIER	transcript	83	0	0	109	56	0.514	SNP	6.03287	2
S3673-THY-resent_vs_S3673-TAIL-resent	chr12	69170317	69170317	G	C	Lrr1	c.207+1255G>C	intron_variant	MODIFIER	transcript	86	1	0.012	79	22	0.282	SNP	6.54674	2
S3642-THY_vs_S3642-LIVER-resent	chr9	77595770	77595770	C	G	Lrrc1-Klhl31	n.77595770C>G	intergenic_region	MODIFIER	intergenic_region	55	1	0.018	67	17	0.254	SNP	3.75169	2
S3666-THY_vs_S3666-TAIL-resent	chr9	77595770	77595770	C	G	Lrrc1-Klhl31	n.77595770C>G	intergenic_region	MODIFIER	intergenic_region	60	0	0	58	24	0.414	SNP	6.55531	2
S3600-THY_vs_S3600-LIVER-resent	chr5	105864880	105864880	C	G	Lrrc8d-Zfp326	n.105864880C>G	intergenic_region	MODIFIER	intergenic_region	77	0	0	113	36	0.314	SNP	6.06823	2
S3635-THY-resent_vs_S3635-LIVER	chr5	105864880	105864880	C	G	Lrrc8d-Zfp326	n.105864880C>G	intergenic_region	MODIFIER	intergenic_region	63	1	0.016	58	20	0.357	SNP	6.06151	2
S3639-THY-resent_vs_S3639-LIVER-resent	chr15	75013359	75013359	C	G	Ly6a-Ly6c1	n.75013359C>G	intergenic_region	MODIFIER	intergenic_region	56	1	0.018	66	32	0.485	SNP	5.87999	2
S3666-THY_vs_S3666-TAIL-resent	chr15	75013359	75013359	C	G	Ly6a-Ly6c1	n.75013359C>G	intergenic_region	MODIFIER	intergenic_region	78	0	0	70	22	0.314	SNP	6.32759	2
S3639-THY-resent_vs_S3639-LIVER-resent	chr13	37697703	37697703	C	G	Ly86-Rreb1	n.37697703C>G	intergenic_region	MODIFIER	intergenic_region	42	1	0.024	45	25	0.556	SNP	6.00897	2
S3669-THY_vs_S3669-TAIL	chr13	37697703	37697703	C	G	Ly86-Rreb1	n.37697703C>G	intergenic_region	MODIFIER	intergenic_region	46	0	0	65	31	0.477	SNP	5.95016	2
S3639-THY-resent_vs_S3639-LIVER-resent	chr18	4287272	4287272	C	G	Lyzl1-Map3k8	n.4287272C>G	intergenic_region	MODIFIER	intergenic_region	49	1	0.021	81	35	0.438	SNP	5.86467	2
S3666-THY_vs_S3666-TAIL-resent	chr18	4287272	4287272	C	G	Lyzl1-Map3k8	n.4287272C>G	intergenic_region	MODIFIER	intergenic_region	93	0	0	87	35	0.402	SNP	6.03553	2
S3669-THY_vs_S3669-TAIL	chr7	19487792	19487792	C	G	Mark4-Bloc1s3	n.19487792C>G	intergenic_region	MODIFIER	intergenic_region	79	0	0	97	33	0.333	SNP	6.46197	2
S3673-THY-resent_vs_S3673-TAIL-resent	chr7	19487792	19487792	C	G	Mark4-Bloc1s3	n.19487792C>G	intergenic_region	MODIFIER	intergenic_region	73	1	0.014	91	38	0.418	SNP	6.15885	2
S3666-THY_vs_S3666-TAIL-resent	chr13	103283915	103283915	C	G	Mast4	c.357+49921G>C	intron_variant	MODIFIER	transcript	93	0	0	95	24	0.255	SNP	6.12454	2
S3673-THY-resent_vs_S3673-TAIL-resent	chr13	103283915	103283915	C	G	Mast4	c.357+49921G>C	intron_variant	MODIFIER	transcript	86	0	0	61	17	0.279	SNP	7.14576	2
S3666-THY_vs_S3666-TAIL-resent	chr18	66901711	66901711	C	G	Mc4r-Gm19784	n.66901711C>G	intergenic_region	MODIFIER	intergenic_region	87	0	0	76	22	0.284	SNP	6.2849	2
S3673-THY-resent_vs_S3673-TAIL-resent	chr18	66901711	66901711	C	G	Mc4r-Gm19784	n.66901711C>G	intergenic_region	MODIFIER	intergenic_region	86	0	0	69	15	0.217	SNP	5.68116	2
S3666-THY_vs_S3666-TAIL-resent	chr10	59552401	59552401	G	C	Mcu	c.148-61245C>G	intron_variant	MODIFIER	transcript	108	0	0	89	34	0.391	SNP	6.0117	2
S3673-THY-resent_vs_S3673-TAIL-resent	chr10	59552401	59552401	G	C	Mcu	c.148-61245C>G	intron_variant	MODIFIER	transcript	103	1	0.01	102	56	0.545	SNP	5.71245	2
S3635-THY-resent_vs_S3635-LIVER	chr1	138049864	138049864	G	C	Mir181b-1-Ptprc	n.138049864G>C	intergenic_region	MODIFIER	intergenic_region	58	0	0	89	29	0.33	SNP	6.71584	2
S3666-THY_vs_S3666-TAIL-resent	chr1	138049864	138049864	G	C	Mir181b-1-Ptprc	n.138049864G>C	intergenic_region	MODIFIER	intergenic_region	74	0	0	118	56	0.479	SNP	5.87516	2
S3600-THY_vs_S3600-LIVER-resent	chr12	36839817	36839817	C	G	Mir5099-Meox2	n.36839817C>G	intergenic_region	MODIFIER	intergenic_region	69	0	0	97	48	0.495	SNP	6.17437	2
S3666-THY_vs_S3666-TAIL-resent	chr12	36839817	36839817	C	G	Mir5099-Meox2	n.36839817C>G	intergenic_region	MODIFIER	intergenic_region	86	0	0	96	24	0.25	SNP	6.89842	2
S3600-THY_vs_S3600-LIVER-resent	chr4	11137719	11137719	G	C	Mir684-2	n.*3537G>C	downstream_gene_variant	MODIFIER	transcript	58	1	0.017	139	58	0.413	SNP	5.65705	2
S3673-THY-resent_vs_S3673-TAIL-resent	chr4	11137719	11137719	G	C	Mir684-2	n.*3537G>C	downstream_gene_variant	MODIFIER	transcript	101	1	0.009901	82	38	0.457	SNP	5.9537	2
S3639-THY-resent_vs_S3639-LIVER-resent	chr12	95420181	95420181	C	G	Mir8099-1-Flrt2	n.95420181C>G	intergenic_region	MODIFIER	intergenic_region	58	0	0	98	21	0.214	SNP	4.42185	2
S3666-THY_vs_S3666-TAIL-resent	chr12	95420181	95420181	C	G	Mir8099-1-Flrt2	n.95420181C>G	intergenic_region	MODIFIER	intergenic_region	93	0	0	84	25	0.301	SNP	5.91654	2
S3635-THY-resent_vs_S3635-LIVER	chr2	157214519	157214519	C	G	Mroh8	c.2935+381G>C	intron_variant	MODIFIER	transcript	82	1	0.013	61	30	0.483	SNP	5.92793	2
S3639-THY-resent_vs_S3639-LIVER-resent	chr2	157214519	157214519	C	G	Mroh8	c.2935+381G>C	intron_variant	MODIFIER	transcript	66	1	0.015	75	52	0.693	SNP	5.75848	2
S3600-THY_vs_S3600-LIVER-resent	chr15	55606660	55606660	C	G	Mtbp	c.1726C>G	missense_variant	MODERATE	transcript	95	0	0	100	54	0.54	SNP	6.01506	2
S3666-THY_vs_S3666-TAIL-resent	chr15	55606660	55606660	C	G	Mtbp	c.1726C>G	missense_variant	MODERATE	transcript	94	0	0	86	33	0.369	SNP	6.36304	2
S3639-THY-resent_vs_S3639-LIVER-resent	chr5	114490382	114490382	C	G	Mvk-Fam222a	n.114490382C>G	intergenic_region	MODIFIER	intergenic_region	56	0	0	64	24	0.375	SNP	5.92259	2
S3669-THY_vs_S3669-TAIL	chr5	114490382	114490382	C	G	Mvk-Fam222a	n.114490382C>G	intergenic_region	MODIFIER	intergenic_region	83	0	0	80	37	0.463	SNP	5.84963	2
S3635-THY-resent_vs_S3635-LIVER	chr2	31261271	31261271	G	C	Ncs1	c.65-9341G>C	intron_variant	MODIFIER	transcript	74	1	0.014	63	15	0.242	SNP	4.26365	2
S3639-THY-resent_vs_S3639-LIVER-resent	chr2	31261271	31261271	G	C	Ncs1	c.65-9341G>C	intron_variant	MODIFIER	transcript	59	1	0.017	65	29	0.446	SNP	5.81671	2
S3635-THY-resent_vs_S3635-LIVER	chr2	75726174	75726174	C	G	Nfe2l2-Agps	n.75726174C>G	intergenic_region	MODIFIER	intergenic_region	70	1	0.014	72	31	0.431	SNP	6.22954	2
S3673-THY-resent_vs_S3673-TAIL-resent	chr2	75726174	75726174	C	G	Nfe2l2-Agps	n.75726174C>G	intergenic_region	MODIFIER	intergenic_region	107	0	0	93	24	0.258	SNP	6.84791	2
S3600-THY_vs_S3600-LIVER-resent	chr4	97673360	97673360	C	G	Nfia	c.96+91288C>G	intron_variant	MODIFIER	transcript	93	1	0.011	103	50	0.48	SNP	5.8243	2
S3673-THY-resent_vs_S3673-TAIL-resent	chr4	97673360	97673360	C	G	Nfia	c.96+91288C>G	intron_variant	MODIFIER	transcript	106	1	0.009524	99	46	0.469	SNP	6.10866	2
S3635-THY-resent_vs_S3635-LIVER	chr2	153572041	153572041	G	C	Nol4l-Commd7	n.153572041G>C	intergenic_region	MODIFIER	intergenic_region	65	0	0	61	28	0.467	SNP	6.13623	2
S3673-THY-resent_vs_S3673-TAIL-resent	chr2	153572041	153572041	G	C	Nol4l-Commd7	n.153572041G>C	intergenic_region	MODIFIER	intergenic_region	68	0	0	48	16	0.333	SNP	6.88686	2
S3669-THY_vs_S3669-TAIL	chr2	26459625	26459625	G	C	Notch1	c.7502C>G	missense_variant	MODERATE	transcript	98	0	0	75	23	0.307	SNP	5.99632	2
S3673-THY-resent_vs_S3673-TAIL-resent	chr2	26459625	26459625	G	C	Notch1	c.7502C>G	missense_variant	MODERATE	transcript	86	0	0	72	28	0.389	SNP	6.51734	2
S3635-THY-resent_vs_S3635-LIVER	chr10	67419390	67419390	G	C	Nrbf2-Egr2	n.67419390G>C	intergenic_region	MODIFIER	intergenic_region	59	0	0	67	22	0.318	SNP	6.51367	2
S3673-THY-resent_vs_S3673-TAIL-resent	chr10	67419390	67419390	G	C	Nrbf2-Egr2	n.67419390G>C	intergenic_region	MODIFIER	intergenic_region	93	0	0	74	17	0.23	SNP	6.50844	2
S3639-THY-resent_vs_S3639-LIVER-resent	chr16	32140470	32140470	G	C	Nrros	c.*2562C>G	downstream_gene_variant	MODIFIER	transcript	52	1	0.019	75	37	0.493	SNP	6.46777	2
S3666-THY_vs_S3666-TAIL-resent	chr16	32140470	32140470	G	C	Nrros	c.*2562C>G	downstream_gene_variant	MODIFIER	transcript	87	0	0	58	18	0.298	SNP	6.37398	2
S3639-THY-resent_vs_S3639-LIVER-resent	chr17	92607303	92607303	G	C	Nrxn1-Adcyap1	n.92607303G>C	intergenic_region	MODIFIER	intergenic_region	63	0	0	61	31	0.508	SNP	6.09855	2
S3669-THY_vs_S3669-TAIL	chr17	92607303	92607303	G	C	Nrxn1-Adcyap1	n.92607303G>C	intergenic_region	MODIFIER	intergenic_region	66	0	0	82	33	0.402	SNP	5.98425	2
S3635-THY-resent_vs_S3635-LIVER	chr15	59498847	59498847	C	G	Nsmce2	c.418+43381C>G	intron_variant	MODIFIER	transcript	78	1	0.013	71	23	0.324	SNP	6.07546	2
S3666-THY_vs_S3666-TAIL-resent	chr15	59498847	59498847	C	G	Nsmce2	c.418+43381C>G	intron_variant	MODIFIER	transcript	88	0	0	83	25	0.305	SNP	6.44746	2
S3635-THY-resent_vs_S3635-LIVER	chr15	59585364	59585364	C	G	Nsmce2	c.419-6333C>G	intron_variant	MODIFIER	transcript	81	1	0.012	74	25	0.338	SNP	6.37905	2
S3639-THY-resent_vs_S3639-LIVER-resent	chr15	59585364	59585364	C	G	Nsmce2	c.419-6333C>G	intron_variant	MODIFIER	transcript	56	0	0	114	49	0.42	SNP	5.83284	2
S3600-THY_vs_S3600-LIVER-resent	chr17	59207690	59207690	C	G	Nudt12-Efna5	n.59207690C>G	intergenic_region	MODIFIER	intergenic_region	61	0	0	97	50	0.515	SNP	6.33543	2
S3639-THY-resent_vs_S3639-LIVER-resent	chr17	59207690	59207690	C	G	Nudt12-Efna5	n.59207690C>G	intergenic_region	MODIFIER	intergenic_region	75	1	0.013	61	36	0.583	SNP	6.23192	2
S3666-THY_vs_S3666-TAIL-resent	chr17	60866696	60866696	G	C	Nudt12-Efna5	n.60866696G>C	intergenic_region	MODIFIER	intergenic_region	88	0	0	80	28	0.354	SNP	5.82588	2
S3669-THY_vs_S3669-TAIL	chr17	60866696	60866696	G	C	Nudt12-Efna5	n.60866696G>C	intergenic_region	MODIFIER	intergenic_region	81	0	0	78	18	0.231	SNP	6.05717	2
S3642-THY_vs_S3642-LIVER-resent	chr5	120756144	120756144	C	G	Oas3	c.3140G>C	missense_variant	MODERATE	transcript	81	1	0.013	93	21	0.226	SNP	4.91887	2
S3669-THY_vs_S3669-TAIL	chr5	120756144	120756144	C	G	Oas3	c.3140G>C	missense_variant	MODERATE	transcript	89	0	0	94	47	0.5	SNP	6.33557	2
S3642-THY_vs_S3642-LIVER-resent	chr11	49160760	49160760	G	C	Olfr1394	c.745G>C	missense_variant	MODERATE	transcript	106	1	0.009434	91	18	0.207	SNP	5.13543	2
S3666-THY_vs_S3666-TAIL-resent	chr11	49160760	49160760	G	C	Olfr1394	c.745G>C	missense_variant	MODERATE	transcript	89	0	0	92	29	0.308	SNP	5.96798	2
S3666-THY_vs_S3666-TAIL-resent	chr10	129426711	129426711	C	G	Olfr785-Olfr786	n.129426711C>G	intergenic_region	MODIFIER	intergenic_region	103	0	0	90	29	0.322	SNP	5.95673	2
S3669-THY_vs_S3669-TAIL	chr10	129426711	129426711	C	G	Olfr785-Olfr786	n.129426711C>G	intergenic_region	MODIFIER	intergenic_region	76	0	0	91	31	0.341	SNP	6.3393	2
S3666-THY_vs_S3666-TAIL-resent	chr7	98148046	98148046	G	C	Omp	c.-2628C>G	upstream_gene_variant	MODIFIER	transcript	85	0	0	84	26	0.31	SNP	6.02135	2
S3673-THY-resent_vs_S3673-TAIL-resent	chr7	98148046	98148046	G	C	Omp	c.-2628C>G	upstream_gene_variant	MODIFIER	transcript	79	1	0.013	81	37	0.457	SNP	6.17323	2
S3669-THY_vs_S3669-TAIL	chr6	50367819	50367819	C	G	Osbpl3	c.93+2304G>C	intron_variant	MODIFIER	transcript	85	0	0	100	44	0.444	SNP	6.2336	2
S3673-THY-resent_vs_S3673-TAIL-resent	chr6	50367819	50367819	C	G	Osbpl3	c.93+2304G>C	intron_variant	MODIFIER	transcript	76	0	0	89	42	0.471	SNP	5.78458	2
S3635-THY-resent_vs_S3635-LIVER	chr3	46452448	46452448	C	G	Pabpc4l	c.-5241G>C	upstream_gene_variant	MODIFIER	transcript	56	0	0	54	11	0.208	SNP	3.64874	2
S3642-THY_vs_S3642-LIVER-resent	chr3	46452448	46452448	C	G	Pabpc4l	c.-5241G>C	upstream_gene_variant	MODIFIER	transcript	63	1	0.016	63	27	0.426	SNP	6.75286	2
S3642-THY_vs_S3642-LIVER-resent	chr3	46677493	46677493	C	G	Pabpc4l-Mir6379	n.46677493C>G	intergenic_region	MODIFIER	intergenic_region	70	0	0	68	29	0.433	SNP	6.25655	2
S3669-THY_vs_S3669-TAIL	chr3	46677493	46677493	C	G	Pabpc4l-Mir6379	n.46677493C>G	intergenic_region	MODIFIER	intergenic_region	74	0	0	59	19	0.328	SNP	5.98888	2
S3666-THY_vs_S3666-TAIL-resent	chr4	65351693	65351693	C	G	Pappa	c.4843C>G	missense_variant	MODERATE	transcript	99	1	0.01	79	30	0.38	SNP	5.79687	2
S3669-THY_vs_S3669-TAIL	chr4	65351693	65351693	C	G	Pappa	c.4843C>G	missense_variant	MODERATE	transcript	65	0	0	99	47	0.475	SNP	6.01026	2
S3666-THY_vs_S3666-TAIL-resent	chr5	97196849	97196849	G	C	Paqr3-Naa11	n.97196849G>C	intergenic_region	MODIFIER	intergenic_region	99	1	0.01	106	38	0.35	SNP	6.22271	2
S3669-THY_vs_S3669-TAIL	chr5	97196849	97196849	G	C	Paqr3-Naa11	n.97196849G>C	intergenic_region	MODIFIER	intergenic_region	75	0	0	97	32	0.33	SNP	6.15424	2
S3642-THY_vs_S3642-LIVER-resent	chr2	168127767	168127767	C	G	Pard6b-E130018N17Rik	n.168127767C>G	intergenic_region	MODIFIER	intergenic_region	73	0	0	86	18	0.212	SNP	4.89317	2
S3669-THY_vs_S3669-TAIL	chr2	168127767	168127767	C	G	Pard6b-E130018N17Rik	n.168127767C>G	intergenic_region	MODIFIER	intergenic_region	81	0	0	92	38	0.418	SNP	5.99694	2
S3635-THY-resent_vs_S3635-LIVER	chr14	89255331	89255331	G	C	Pcdh20-Gm5088	n.89255331G>C	intergenic_region	MODIFIER	intergenic_region	71	1	0.014	48	16	0.333	SNP	5.99648	2
S3666-THY_vs_S3666-TAIL-resent	chr14	89255331	89255331	G	C	Pcdh20-Gm5088	n.89255331G>C	intergenic_region	MODIFIER	intergenic_region	90	0	0	88	33	0.379	SNP	5.84503	2
S3669-THY_vs_S3669-TAIL	chr2	76270032	76270032	C	G	Pde11a	c.1071+21133G>C	intron_variant	MODIFIER	transcript	62	0	0	106	34	0.324	SNP	6.21755	2
S3673-THY-resent_vs_S3673-TAIL-resent	chr2	76270032	76270032	C	G	Pde11a	c.1071+21133G>C	intron_variant	MODIFIER	transcript	88	1	0.011	76	32	0.421	SNP	6.0051	2
S3635-THY-resent_vs_S3635-LIVER	chr6	5676879	5676879	G	C	Pdk4-Dync1i1	n.5676879G>C	intergenic_region	MODIFIER	intergenic_region	74	1	0.014	51	11	0.216	SNP	3.67969	2
S3669-THY_vs_S3669-TAIL	chr6	5676879	5676879	G	C	Pdk4-Dync1i1	n.5676879G>C	intergenic_region	MODIFIER	intergenic_region	90	1	0.011	100	46	0.46	SNP	5.86369	2
S3642-THY_vs_S3642-LIVER-resent	chrX	157416592	157416592	G	C	Phex	c.-1836C>G	upstream_gene_variant	MODIFIER	transcript	93	1	0.011	75	25	0.333	SNP	5.76489	2
S3666-THY_vs_S3666-TAIL-resent	chrX	157416592	157416592	G	C	Phex	c.-1836C>G	upstream_gene_variant	MODIFIER	transcript	79	0	0	71	22	0.309	SNP	6.31296	2
S3635-THY-resent_vs_S3635-LIVER	chr11	95831134	95831134	C	G	Phospho1	c.629C>G	missense_variant	MODERATE	transcript	90	1	0.011	81	28	0.346	SNP	6.13855	2
S3669-THY_vs_S3669-TAIL	chr11	95831134	95831134	C	G	Phospho1	c.629C>G	missense_variant	MODERATE	transcript	91	0	0	111	24	0.216	SNP	6.14855	2
S3669-THY_vs_S3669-TAIL	chr2	30264586	30264586	G	C	Phyhd1	c.-2026G>C	upstream_gene_variant	MODIFIER	transcript	74	0	0	111	54	0.5	SNP	6.00688	2
S3673-THY-resent_vs_S3673-TAIL-resent	chr2	30264586	30264586	G	C	Phyhd1	c.-2026G>C	upstream_gene_variant	MODIFIER	transcript	102	1	0.009901	85	35	0.417	SNP	6.36018	2
S3600-THY_vs_S3600-LIVER-resent	chr18	30488393	30488393	G	C	Pik3c3-Rit2	n.30488393G>C	intergenic_region	MODIFIER	intergenic_region	78	0	0	115	52	0.452	SNP	5.96516	2
S3642-THY_vs_S3642-LIVER-resent	chr18	30488393	30488393	G	C	Pik3c3-Rit2	n.30488393G>C	intergenic_region	MODIFIER	intergenic_region	87	1	0.011	86	31	0.36	SNP	6.59481	2
S3600-THY_vs_S3600-LIVER-resent	chr1	88994159	88994159	C	G	Platr5-1700067G17Rik	n.88994159C>G	intergenic_region	MODIFIER	intergenic_region	56	0	0	82	45	0.549	SNP	6.09789	2
S3669-THY_vs_S3669-TAIL	chr1	88994159	88994159	C	G	Platr5-1700067G17Rik	n.88994159C>G	intergenic_region	MODIFIER	intergenic_region	42	0	0	45	15	0.341	SNP	4.77339	2
S3635-THY-resent_vs_S3635-LIVER	chr2	32107750	32107750	G	C	Plpp7	c.452-1859G>C	intron_variant	MODIFIER	transcript	83	1	0.012	70	42	0.6	SNP	6.2506	2
S3673-THY-resent_vs_S3673-TAIL-resent	chr2	32107750	32107750	G	C	Plpp7	c.452-1859G>C	intron_variant	MODIFIER	transcript	92	0	0	71	21	0.304	SNP	6.83503	2
S3635-THY-resent_vs_S3635-LIVER	chr10	106735597	106735597	C	G	Ppfia2	c.304-7890C>G	intron_variant	MODIFIER	transcript	50	1	0.02	42	10	0.22	SNP	2.66892	2
S3639-THY-resent_vs_S3639-LIVER-resent	chr10	106735597	106735597	C	G	Ppfia2	c.304-7890C>G	intron_variant	MODIFIER	transcript	51	0	0	55	13	0.241	SNP	3.91678	2
S3669-THY_vs_S3669-TAIL	chr11	6413939	6413939	C	G	Ppia	c.-1972C>G	upstream_gene_variant	MODIFIER	transcript	84	0	0	108	57	0.533	SNP	5.87475	2
S3673-THY-resent_vs_S3673-TAIL-resent	chr11	6413939	6413939	C	G	Ppia	c.-1972C>G	upstream_gene_variant	MODIFIER	transcript	90	0	0	74	16	0.225	SNP	5.96083	2
S3600-THY_vs_S3600-LIVER-resent	chr4	154438211	154438211	C	G	Prdm16	c.435+38428G>C	intron_variant	MODIFIER	transcript	85	0	0	105	49	0.471	SNP	6.14442	2
S3635-THY-resent_vs_S3635-LIVER	chr4	154438211	154438211	C	G	Prdm16	c.435+38428G>C	intron_variant	MODIFIER	transcript	68	1	0.015	95	25	0.263	SNP	5.26998	2
S3600-THY_vs_S3600-LIVER-resent	chr6	100032446	100032446	C	G	Prok2-Rybp	n.100032446C>G	intergenic_region	MODIFIER	intergenic_region	79	0	0	125	60	0.488	SNP	5.85706	2
S3666-THY_vs_S3666-TAIL-resent	chr6	100032446	100032446	C	G	Prok2-Rybp	n.100032446C>G	intergenic_region	MODIFIER	intergenic_region	106	0	0	99	45	0.449	SNP	5.87622	2
S3600-THY_vs_S3600-LIVER-resent	chr19	10891552	10891552	G	C	Prpf19	c.-3898G>C	upstream_gene_variant	MODIFIER	transcript	106	0	0	131	40	0.3	SNP	5.97516	2
S3666-THY_vs_S3666-TAIL-resent	chr19	10891552	10891552	G	C	Prpf19	c.-3898G>C	upstream_gene_variant	MODIFIER	transcript	78	0	0	79	21	0.266	SNP	6.68635	2
S3666-THY_vs_S3666-TAIL-resent	chr11	116499432	116499432	G	C	Prpsap1-Sphk1	n.116499432G>C	intergenic_region	MODIFIER	intergenic_region	103	0	0	87	34	0.391	SNP	6.13181	2
S3669-THY_vs_S3669-TAIL	chr11	116499432	116499432	G	C	Prpsap1-Sphk1	n.116499432G>C	intergenic_region	MODIFIER	intergenic_region	90	1	0.011	88	45	0.506	SNP	6.01623	2
S3669-THY_vs_S3669-TAIL	chr14	101237047	101237047	C	G	Prr30-Tbc1d4	n.101237047C>G	intergenic_region	MODIFIER	intergenic_region	85	0	0	82	37	0.451	SNP	5.81209	2
S3673-THY-resent_vs_S3673-TAIL-resent	chr14	101237047	101237047	C	G	Prr30-Tbc1d4	n.101237047C>G	intergenic_region	MODIFIER	intergenic_region	90	0	0	98	20	0.208	SNP	6.04755	2
S3635-THY-resent_vs_S3635-LIVER	chr5	123309159	123309159	C	G	Psmd9-Bcl7a	n.123309159C>G	intergenic_region	MODIFIER	intergenic_region	63	1	0.016	62	20	0.323	SNP	5.38859	2
S3673-THY-resent_vs_S3673-TAIL-resent	chr5	123309159	123309159	C	G	Psmd9-Bcl7a	n.123309159C>G	intergenic_region	MODIFIER	intergenic_region	88	0	0	85	19	0.226	SNP	5.87292	2
S3639-THY-resent_vs_S3639-LIVER-resent	chr19	32799995	32799995	C	G	Pten	c.388C>G	missense_variant	MODERATE	transcript	64	0	0	73	17	0.233	SNP	5.04361	2
S3673-THY-resent_vs_S3673-TAIL-resent	chr19	32799995	32799995	C	G	Pten	c.388C>G	missense_variant	MODERATE	transcript	112	0	0	95	37	0.394	SNP	5.99905	2
S3637-THY_vs_S3637-LIVER	chr18	67745591	67745591	G	C	Ptpn2-Seh1l	n.67745591G>C	intergenic_region	MODIFIER	intergenic_region	61	1	0.016	123	58	0.475	SNP	6.2215	2
S3669-THY_vs_S3669-TAIL	chr18	67745591	67745591	G	C	Ptpn2-Seh1l	n.67745591G>C	intergenic_region	MODIFIER	intergenic_region	61	0	0	71	35	0.493	SNP	6.02289	2
S3639-THY-resent_vs_S3639-LIVER-resent	chr7	135605773	135605773	G	C	Ptpre	c.54-38085G>C	intron_variant	MODIFIER	transcript	79	1	0.013	103	47	0.455	SNP	6.36691	2
S3673-THY-resent_vs_S3673-TAIL-resent	chr7	135605773	135605773	G	C	Ptpre	c.54-38085G>C	intron_variant	MODIFIER	transcript	99	0	0	90	20	0.23	SNP	6.00965	2
S3637-THY_vs_S3637-LIVER	chr8	13691820	13691820	C	G	Rasa3-4932443I19Rik	n.13691820C>G	intergenic_region	MODIFIER	intergenic_region	59	0	0	120	49	0.415	SNP	6.15056	2
S3669-THY_vs_S3669-TAIL	chr8	13691820	13691820	C	G	Rasa3-4932443I19Rik	n.13691820C>G	intergenic_region	MODIFIER	intergenic_region	84	0	0	102	41	0.402	SNP	6.10057	2
S3635-THY-resent_vs_S3635-LIVER	chr15	81570204	81570204	C	G	Rbx1-Ep300	n.81570204C>G	intergenic_region	MODIFIER	intergenic_region	59	0	0	91	32	0.36	SNP	6.07033	2
S3666-THY_vs_S3666-TAIL-resent	chr15	81570204	81570204	C	G	Rbx1-Ep300	n.81570204C>G	intergenic_region	MODIFIER	intergenic_region	92	0	0	84	37	0.44	SNP	6.18621	2
S3666-THY_vs_S3666-TAIL-resent	chr17	16488765	16488765	G	C	Rgmb-Zfp960	n.16488765G>C	intergenic_region	MODIFIER	intergenic_region	94	1	0.011	75	25	0.338	SNP	6.17838	2
S3669-THY_vs_S3669-TAIL	chr17	16488765	16488765	G	C	Rgmb-Zfp960	n.16488765G>C	intergenic_region	MODIFIER	intergenic_region	62	0	0	86	43	0.506	SNP	5.99498	2
S3635-THY-resent_vs_S3635-LIVER	chr15	36139089	36139089	C	G	Rgs22	c.54+790G>C	intron_variant	MODIFIER	transcript	85	0	0	85	23	0.274	SNP	5.86491	2
S3666-THY_vs_S3666-TAIL-resent	chr15	36139089	36139089	C	G	Rgs22	c.54+790G>C	intron_variant	MODIFIER	transcript	89	0	0	105	32	0.308	SNP	6.52218	2
S3637-THY_vs_S3637-LIVER	chr4	62592481	62592481	C	G	Rgs3	n.62592481C>G	intragenic_variant	MODIFIER	gene_variant	81	1	0.013	131	55	0.423	SNP	6.01164	2
S3673-THY-resent_vs_S3673-TAIL-resent	chr4	62592481	62592481	C	G	Rgs3	n.62592481C>G	intragenic_variant	MODIFIER	gene_variant	87	1	0.012	85	43	0.518	SNP	5.8601	2
S3637-THY_vs_S3637-LIVER	chr5	135652098	135652098	C	G	Rhbdd2-Por	n.135652098C>G	intergenic_region	MODIFIER	intergenic_region	69	1	0.014	152	74	0.49	SNP	5.8922	2
S3669-THY_vs_S3669-TAIL	chr5	135652098	135652098	C	G	Rhbdd2-Por	n.135652098C>G	intergenic_region	MODIFIER	intergenic_region	74	0	0	95	37	0.383	SNP	6.41667	2
S3635-THY-resent_vs_S3635-LIVER	chr19	5056829	5056829	C	G	Rin1	c.*1591C>G	3_prime_UTR_variant	MODIFIER	transcript	79	1	0.013	54	27	0.5	SNP	6.19771	2
S3669-THY_vs_S3669-TAIL	chr19	5056829	5056829	C	G	Rin1	c.*1591C>G	3_prime_UTR_variant	MODIFIER	transcript	83	0	0	85	47	0.553	SNP	6.04185	2
S3639-THY-resent_vs_S3639-LIVER-resent	chr16	10840229	10840229	C	G	Rmi2	c.*252C>G	3_prime_UTR_variant	MODIFIER	transcript	39	0	0	47	26	0.553	SNP	6.76844	2
S3673-THY-resent_vs_S3673-TAIL-resent	chr16	10840229	10840229	C	G	Rmi2	c.*252C>G	3_prime_UTR_variant	MODIFIER	transcript	50	1	0.02	50	24	0.48	SNP	5.94209	2
S3669-THY_vs_S3669-TAIL	chr11	101476620	101476620	C	G	Rnd2-Brca1	n.101476620C>G	intergenic_region	MODIFIER	intergenic_region	64	1	0.016	84	44	0.524	SNP	5.79024	2
S3673-THY-resent_vs_S3673-TAIL-resent	chr11	101476620	101476620	C	G	Rnd2-Brca1	n.101476620C>G	intergenic_region	MODIFIER	intergenic_region	79	1	0.013	72	37	0.514	SNP	5.85891	2
S3600-THY_vs_S3600-LIVER-resent	chr13	105249936	105249936	G	C	Rnf180	c.866C>G	missense_variant	MODERATE	transcript	76	0	0	128	59	0.465	SNP	6.00866	2
S3642-THY_vs_S3642-LIVER-resent	chr13	105249936	105249936	G	C	Rnf180	c.866C>G	missense_variant	MODERATE	transcript	97	1	0.01	102	42	0.406	SNP	5.77723	2
S3639-THY-resent_vs_S3639-LIVER-resent	chr11	87699955	87699955	G	C	Rnf43	c.253-18423G>C	intron_variant	MODIFIER	transcript	46	1	0.022	97	63	0.649	SNP	6.14459	2
S3669-THY_vs_S3669-TAIL	chr11	87699955	87699955	G	C	Rnf43	c.253-18423G>C	intron_variant	MODIFIER	transcript	75	0	0	95	41	0.426	SNP	5.86215	2
S3639-THY-resent_vs_S3639-LIVER-resent	chr4	33908345	33908345	C	G	Rngtt-Cnr1	n.33908345C>G	intergenic_region	MODIFIER	intergenic_region	53	1	0.019	64	32	0.5	SNP	6.05727	2
S3669-THY_vs_S3669-TAIL	chr4	33908345	33908345	C	G	Rngtt-Cnr1	n.33908345C>G	intergenic_region	MODIFIER	intergenic_region	61	0	0	46	13	0.283	SNP	5.25041	2
S3635-THY-resent_vs_S3635-LIVER	chr19	33346808	33346808	C	G	Rnls	c.400+35559G>C	intron_variant	MODIFIER	transcript	75	0	0	64	22	0.349	SNP	6.41296	2
S3673-THY-resent_vs_S3673-TAIL-resent	chr19	33346808	33346808	C	G	Rnls	c.400+35559G>C	intron_variant	MODIFIER	transcript	102	0	0	75	21	0.284	SNP	7.03828	2
S3639-THY-resent_vs_S3639-LIVER-resent	chr9	68924507	68924507	C	G	Rora	c.166+270535C>G	intron_variant	MODIFIER	transcript	57	1	0.018	87	45	0.517	SNP	5.96584	2
S3666-THY_vs_S3666-TAIL-resent	chr9	68924507	68924507	C	G	Rora	c.166+270535C>G	intron_variant	MODIFIER	transcript	105	0	0	102	29	0.29	SNP	6.48906	2
S3666-THY_vs_S3666-TAIL-resent	chr3	130750614	130750614	G	C	Rpl34-Lef1	n.130750614G>C	intergenic_region	MODIFIER	intergenic_region	76	0	0	97	34	0.351	SNP	6.27959	2
S3673-THY-resent_vs_S3673-TAIL-resent	chr3	130750614	130750614	G	C	Rpl34-Lef1	n.130750614G>C	intergenic_region	MODIFIER	intergenic_region	81	1	0.012	82	21	0.256	SNP	5.54298	2
S3666-THY_vs_S3666-TAIL-resent	chr3	130790960	130790960	C	G	Rpl34-Lef1	n.130790960C>G	intergenic_region	MODIFIER	intergenic_region	82	0	0	77	32	0.416	SNP	6.17549	2
S3669-THY_vs_S3669-TAIL	chr3	130790960	130790960	C	G	Rpl34-Lef1	n.130790960C>G	intergenic_region	MODIFIER	intergenic_region	83	0	0	97	46	0.469	SNP	6.07091	2
S3635-THY-resent_vs_S3635-LIVER	chr9	106487827	106487827	G	C	Rrp9	c.*2482G>C	downstream_gene_variant	MODIFIER	transcript	80	0	0	58	13	0.224	SNP	5.27183	2
S3669-THY_vs_S3669-TAIL	chr9	106487827	106487827	G	C	Rrp9	c.*2482G>C	downstream_gene_variant	MODIFIER	transcript	84	0	0	80	39	0.488	SNP	5.9406	2
S3635-THY-resent_vs_S3635-LIVER	chr11	50559678	50559678	C	G	Rufy1-Adamts2	n.50559678C>G	intergenic_region	MODIFIER	intergenic_region	76	1	0.013	89	35	0.379	SNP	5.98639	2
S3673-THY-resent_vs_S3673-TAIL-resent	chr11	50559678	50559678	C	G	Rufy1-Adamts2	n.50559678C>G	intergenic_region	MODIFIER	intergenic_region	87	0	0	94	33	0.351	SNP	6.3657	2
S3635-THY-resent_vs_S3635-LIVER	chr5	150059805	150059805	C	G	Rxfp2	c.879-75C>G	intron_variant	MODIFIER	transcript	70	0	0	60	13	0.22	SNP	4.7044	2
S3666-THY_vs_S3666-TAIL-resent	chr5	150059805	150059805	C	G	Rxfp2	c.879-75C>G	intron_variant	MODIFIER	transcript	78	0	0	84	35	0.417	SNP	6.17441	2
S3666-THY_vs_S3666-TAIL-resent	chr18	81853780	81853780	G	C	Sall3-Mir5127	n.81853780G>C	intergenic_region	MODIFIER	intergenic_region	70	0	0	59	24	0.407	SNP	6.45195	2
S3669-THY_vs_S3669-TAIL	chr18	81853780	81853780	G	C	Sall3-Mir5127	n.81853780G>C	intergenic_region	MODIFIER	intergenic_region	73	0	0	53	24	0.453	SNP	6.08254	2
S3642-THY_vs_S3642-LIVER-resent	chr16	76029227	76029227	C	G	Samsn1-4930578N18Rik	n.76029227C>G	intergenic_region	MODIFIER	intergenic_region	74	0	0	81	22	0.263	SNP	6.24354	2
S3669-THY_vs_S3669-TAIL	chr16	76029227	76029227	C	G	Samsn1-4930578N18Rik	n.76029227C>G	intergenic_region	MODIFIER	intergenic_region	71	0	0	101	42	0.416	SNP	5.84771	2
S3635-THY-resent_vs_S3635-LIVER	chr18	31755433	31755433	C	G	Sap130-Ammecr1l	n.31755433C>G	intergenic_region	MODIFIER	intergenic_region	71	0	0	68	14	0.215	SNP	4.67707	2
S3669-THY_vs_S3669-TAIL	chr18	31755433	31755433	C	G	Sap130-Ammecr1l	n.31755433C>G	intergenic_region	MODIFIER	intergenic_region	80	1	0.013	87	37	0.424	SNP	6.15456	2
S3639-THY-resent_vs_S3639-LIVER-resent	chr15	96537398	96537398	G	C	Scaf11-Slc38a1	n.96537398G>C	intergenic_region	MODIFIER	intergenic_region	76	0	0	102	40	0.392	SNP	5.97192	2
S3642-THY_vs_S3642-LIVER-resent	chr15	96537398	96537398	G	C	Scaf11-Slc38a1	n.96537398G>C	intergenic_region	MODIFIER	intergenic_region	74	0	0	92	22	0.239	SNP	6.13125	2
S3666-THY_vs_S3666-TAIL-resent	chr1	107214444	107214444	C	G	Serpinb3b-Serpinb3c	n.107214444C>G	intergenic_region	MODIFIER	intergenic_region	87	0	0	124	33	0.26	SNP	6.41823	2
S3669-THY_vs_S3669-TAIL	chr1	107214444	107214444	C	G	Serpinb3b-Serpinb3c	n.107214444C>G	intergenic_region	MODIFIER	intergenic_region	58	0	0	102	30	0.294	SNP	6.05795	2
S3666-THY_vs_S3666-TAIL-resent	chr1	79860927	79860927	C	G	Serpine2	c.-39392G>C	upstream_gene_variant	MODIFIER	transcript	115	0	0	139	33	0.237	SNP	6.05107	2
S3669-THY_vs_S3669-TAIL	chr1	79860927	79860927	C	G	Serpine2	c.-39392G>C	upstream_gene_variant	MODIFIER	transcript	78	0	0	77	31	0.403	SNP	6.38472	2
S3642-THY_vs_S3642-LIVER-resent	chr3	54899650	54899650	G	C	Sertm1	c.-48C>G	5_prime_UTR_variant	MODIFIER	transcript	94	1	0.011	71	18	0.254	SNP	6.10095	2
S3673-THY-resent_vs_S3673-TAIL-resent	chr3	54899650	54899650	G	C	Sertm1	c.-48C>G	5_prime_UTR_variant	MODIFIER	transcript	101	0	0	75	15	0.203	SNP	5.94173	2
S3635-THY-resent_vs_S3635-LIVER	chr1	171829017	171829017	C	G	Slamf1-Cd84	n.171829017C>G	intergenic_region	MODIFIER	intergenic_region	61	1	0.017	76	35	0.461	SNP	5.83776	2
S3673-THY-resent_vs_S3673-TAIL-resent	chr1	171829017	171829017	C	G	Slamf1-Cd84	n.171829017C>G	intergenic_region	MODIFIER	intergenic_region	96	1	0.01	85	21	0.247	SNP	6.19761	2
S3642-THY_vs_S3642-LIVER-resent	chr16	33575237	33575237	C	G	Slc12a8	c.620-15015C>G	intron_variant	MODIFIER	transcript	110	1	0.009091	101	21	0.208	SNP	6.0238	2
S3669-THY_vs_S3669-TAIL	chr16	33575237	33575237	C	G	Slc12a8	c.620-15015C>G	intron_variant	MODIFIER	transcript	76	0	0	105	51	0.485	SNP	5.76669	2
S3642-THY_vs_S3642-LIVER-resent	chr9	119180532	119180532	G	C	Slc22a14	c.496C>G	missense_variant	MODERATE	transcript	96	0	0	88	18	0.209	SNP	6.20367	2
S3666-THY_vs_S3666-TAIL-resent	chr9	119180532	119180532	G	C	Slc22a14	c.496C>G	missense_variant	MODERATE	transcript	100	0	0	89	30	0.337	SNP	6.35099	2
S3600-THY_vs_S3600-LIVER-resent	chr19	8010729	8010729	G	C	Slc22a27-Slc22a28	n.8010729G>C	intergenic_region	MODIFIER	intergenic_region	50	1	0.02	99	44	0.449	SNP	6.42734	2
S3673-THY-resent_vs_S3673-TAIL-resent	chr19	8010729	8010729	G	C	Slc22a27-Slc22a28	n.8010729G>C	intergenic_region	MODIFIER	intergenic_region	77	1	0.013	56	13	0.236	SNP	4.30585	2
S3669-THY_vs_S3669-TAIL	chr11	53916483	53916483	C	G	Slc22a5-Slc22a21	n.53916483C>G	intergenic_region	MODIFIER	intergenic_region	76	0	0	90	41	0.456	SNP	6.32856	2
S3673-THY-resent_vs_S3673-TAIL-resent	chr11	53916483	53916483	C	G	Slc22a5-Slc22a21	n.53916483C>G	intergenic_region	MODIFIER	intergenic_region	85	1	0.012	71	33	0.464	SNP	5.90652	2
S3600-THY_vs_S3600-LIVER-resent	chr14	70306582	70306582	G	C	Slc39a14	c.*84C>G	3_prime_UTR_variant	MODIFIER	transcript	74	1	0.014	114	57	0.496	SNP	5.74639	2
S3639-THY-resent_vs_S3639-LIVER-resent	chr14	70306582	70306582	G	C	Slc39a14	c.*84C>G	3_prime_UTR_variant	MODIFIER	transcript	55	1	0.018	83	44	0.524	SNP	6.07337	2
S3666-THY_vs_S3666-TAIL-resent	chr5	89269888	89269888	G	C	Slc4a4-Gc	n.89269888G>C	intergenic_region	MODIFIER	intergenic_region	70	0	0	81	32	0.4	SNP	5.77064	2
S3669-THY_vs_S3669-TAIL	chr5	89269888	89269888	G	C	Slc4a4-Gc	n.89269888G>C	intergenic_region	MODIFIER	intergenic_region	96	0	0	72	18	0.25	SNP	7.22188	2
S3635-THY-resent_vs_S3635-LIVER	chr4	133412033	133412033	G	C	Slc9a1	c.561G>C	synonymous_variant	LOW	transcript	77	1	0.013	96	27	0.281	SNP	5.79405	2
S3666-THY_vs_S3666-TAIL-resent	chr4	133412033	133412033	G	C	Slc9a1	c.561G>C	synonymous_variant	LOW	transcript	87	0	0	104	36	0.343	SNP	6.32328	2
S3639-THY-resent_vs_S3639-LIVER-resent	chr10	49035896	49035896	C	G	Snord14d-C130030K03Rik	n.49035896C>G	intergenic_region	MODIFIER	intergenic_region	68	0	0	57	13	0.232	SNP	4.79617	2
S3673-THY-resent_vs_S3673-TAIL-resent	chr10	49035896	49035896	C	G	Snord14d-C130030K03Rik	n.49035896C>G	intergenic_region	MODIFIER	intergenic_region	84	1	0.012	78	42	0.532	SNP	6.07652	2
S3642-THY_vs_S3642-LIVER-resent	chr19	5528895	5528895	C	G	Snx32-Ovol1	n.5528895C>G	intergenic_region	MODIFIER	intergenic_region	75	1	0.013	79	33	0.418	SNP	5.89051	2
S3673-THY-resent_vs_S3673-TAIL-resent	chr19	5528895	5528895	C	G	Snx32-Ovol1	n.5528895C>G	intergenic_region	MODIFIER	intergenic_region	98	1	0.01	68	16	0.224	SNP	5.65079	2
S3639-THY-resent_vs_S3639-LIVER-resent	chr6	144694330	144694330	C	G	Sox5os3	n.*498C>G	downstream_gene_variant	MODIFIER	transcript	59	1	0.017	89	53	0.596	SNP	6.16896	2
S3666-THY_vs_S3666-TAIL-resent	chr6	144694330	144694330	C	G	Sox5os3	n.*498C>G	downstream_gene_variant	MODIFIER	transcript	108	0	0	92	31	0.337	SNP	6.15985	2
S3637-THY_vs_S3637-LIVER	chr15	102395213	102395213	G	C	Sp7-Sp1	n.102395213G>C	intergenic_region	MODIFIER	intergenic_region	53	1	0.019	153	54	0.358	SNP	6.39887	2
S3666-THY_vs_S3666-TAIL-resent	chr15	102395213	102395213	G	C	Sp7-Sp1	n.102395213G>C	intergenic_region	MODIFIER	intergenic_region	84	0	0	76	28	0.368	SNP	5.87179	2
S3600-THY_vs_S3600-LIVER-resent	chr10	88702811	88702811	G	C	Spic-Gm4925	n.88702811G>C	intergenic_region	MODIFIER	intergenic_region	54	0	0	85	35	0.412	SNP	5.78381	2
S3673-THY-resent_vs_S3673-TAIL-resent	chr10	88702811	88702811	G	C	Spic-Gm4925	n.88702811G>C	intergenic_region	MODIFIER	intergenic_region	67	0	0	63	14	0.213	SNP	4.76696	2
S3666-THY_vs_S3666-TAIL-resent	chr14	31142965	31142965	C	G	Stab1	c.5702G>C	missense_variant	MODERATE	transcript	106	0	0	89	28	0.315	SNP	6.30229	2
S3669-THY_vs_S3669-TAIL	chr14	31142965	31142965	C	G	Stab1	c.5702G>C	missense_variant	MODERATE	transcript	93	0	0	113	53	0.469	SNP	5.96221	2
S3635-THY-resent_vs_S3635-LIVER	chr5	114050730	114050730	G	C	Svop	c.578+3747C>G	intron_variant	MODIFIER	transcript	61	1	0.016	63	28	0.444	SNP	5.93968	2
S3666-THY_vs_S3666-TAIL-resent	chr5	114050730	114050730	G	C	Svop	c.578+3747C>G	intron_variant	MODIFIER	transcript	86	0	0	88	32	0.368	SNP	5.94268	2
S3639-THY-resent_vs_S3639-LIVER-resent	chr10	109432348	109432348	C	G	Syt1-Nav3	n.109432348C>G	intergenic_region	MODIFIER	intergenic_region	51	0	0	86	44	0.518	SNP	5.89454	2
S3666-THY_vs_S3666-TAIL-resent	chr10	109432348	109432348	C	G	Syt1-Nav3	n.109432348C>G	intergenic_region	MODIFIER	intergenic_region	86	0	0	95	32	0.33	SNP	6.00901	2
S3639-THY-resent_vs_S3639-LIVER-resent	chr7	141407576	141407576	C	G	Taldo1	c.*4800C>G	downstream_gene_variant	MODIFIER	transcript	62	1	0.016	69	33	0.478	SNP	6.08972	2
S3673-THY-resent_vs_S3673-TAIL-resent	chr7	141407576	141407576	C	G	Taldo1	c.*4800C>G	downstream_gene_variant	MODIFIER	transcript	73	0	0	72	17	0.236	SNP	5.27381	2
S3600-THY_vs_S3600-LIVER-resent	chr2	59792175	59792175	G	C	Tanc1	c.1342+295G>C	intron_variant	MODIFIER	transcript	65	0	0	106	51	0.481	SNP	6.06785	2
S3669-THY_vs_S3669-TAIL	chr2	59792175	59792175	G	C	Tanc1	c.1342+295G>C	intron_variant	MODIFIER	transcript	75	0	0	83	40	0.482	SNP	5.91063	2
S3666-THY_vs_S3666-TAIL-resent	chr15	86968936	86968936	G	C	Tbc1d22a-Fam19a5	n.86968936G>C	intergenic_region	MODIFIER	intergenic_region	92	0	0	84	23	0.274	SNP	6.51395	2
S3669-THY_vs_S3669-TAIL	chr15	86968936	86968936	G	C	Tbc1d22a-Fam19a5	n.86968936G>C	intergenic_region	MODIFIER	intergenic_region	76	0	0	83	37	0.446	SNP	5.88847	2
S3669-THY_vs_S3669-TAIL	chr11	6617607	6617607	G	C	Tbrg4	c.1587C>G	synonymous_variant	LOW	transcript	79	1	0.013	98	52	0.526	SNP	5.97211	2
S3673-THY-resent_vs_S3673-TAIL-resent	chr11	6617607	6617607	G	C	Tbrg4	c.1587C>G	synonymous_variant	LOW	transcript	97	1	0.011	71	31	0.443	SNP	5.75838	2
S3666-THY_vs_S3666-TAIL-resent	chr6	72726746	72726746	C	G	Tcf7l1	c.435+61465G>C	intron_variant	MODIFIER	transcript	69	1	0.014	75	35	0.467	SNP	6.11829	2
S3673-THY-resent_vs_S3673-TAIL-resent	chr6	72726746	72726746	C	G	Tcf7l1	c.435+61465G>C	intron_variant	MODIFIER	transcript	66	1	0.015	73	31	0.437	SNP	6.34911	2
S3666-THY_vs_S3666-TAIL-resent	chr12	105151458	105151458	G	C	Tcl1b2	c.145-1541G>C	intron_variant	MODIFIER	transcript	83	0	0	89	26	0.292	SNP	6.23682	2
S3669-THY_vs_S3669-TAIL	chr12	105151458	105151458	G	C	Tcl1b2	c.145-1541G>C	intron_variant	MODIFIER	transcript	82	0	0	88	31	0.352	SNP	5.76381	2
S3639-THY-resent_vs_S3639-LIVER-resent	chr17	28074958	28074958	C	G	Tcp11	c.432-186G>C	intron_variant	MODIFIER	transcript	60	1	0.017	84	35	0.422	SNP	5.89946	2
S3669-THY_vs_S3669-TAIL	chr17	28074958	28074958	C	G	Tcp11	c.432-186G>C	intron_variant	MODIFIER	transcript	87	0	0	81	32	0.395	SNP	6.11496	2
S3642-THY_vs_S3642-LIVER-resent	chr5	122252780	122252780	C	G	Tctn1	c.737-1059G>C	intron_variant	MODIFIER	transcript	80	0	0	78	17	0.208	SNP	5.6411	2
S3666-THY_vs_S3666-TAIL-resent	chr5	122252780	122252780	C	G	Tctn1	c.737-1059G>C	intron_variant	MODIFIER	transcript	93	0	0	88	31	0.352	SNP	6.07724	2
S3639-THY-resent_vs_S3639-LIVER-resent	chr5	83374208	83374208	G	C	Tecrl-Epha5	n.83374208G>C	intergenic_region	MODIFIER	intergenic_region	55	1	0.018	50	25	0.5	SNP	5.97431	2
S3642-THY_vs_S3642-LIVER-resent	chr5	83374208	83374208	G	C	Tecrl-Epha5	n.83374208G>C	intergenic_region	MODIFIER	intergenic_region	62	0	0	85	36	0.417	SNP	5.87042	2
S3642-THY_vs_S3642-LIVER-resent	chr2	172568107	172568107	C	G	Tfap2c-Bmp7	n.172568107C>G	intergenic_region	MODIFIER	intergenic_region	92	1	0.011	80	20	0.25	SNP	5.89158	2
S3666-THY_vs_S3666-TAIL-resent	chr2	172568107	172568107	C	G	Tfap2c-Bmp7	n.172568107C>G	intergenic_region	MODIFIER	intergenic_region	85	0	0	87	20	0.233	SNP	6.24805	2
S3666-THY_vs_S3666-TAIL-resent	chr9	123070002	123070002	G	C	Tgm4	c.*3129G>C	downstream_gene_variant	MODIFIER	transcript	82	0	0	65	23	0.359	SNP	6.10986	2
S3669-THY_vs_S3669-TAIL	chr9	123070002	123070002	G	C	Tgm4	c.*3129G>C	downstream_gene_variant	MODIFIER	transcript	66	0	0	94	56	0.596	SNP	5.77782	2
S3639-THY-resent_vs_S3639-LIVER-resent	chr11	118357377	118357377	G	C	Timp2	c.-2287C>G	upstream_gene_variant	MODIFIER	transcript	47	1	0.021	114	30	0.265	SNP	3.87677	2
S3642-THY_vs_S3642-LIVER-resent	chr11	118357377	118357377	G	C	Timp2	c.-2287C>G	upstream_gene_variant	MODIFIER	transcript	94	1	0.011	72	20	0.278	SNP	6.86175	2
S3669-THY_vs_S3669-TAIL	chr5	125936244	125936244	G	C	Tmem132b-4933438B17Rik	n.125936244G>C	intergenic_region	MODIFIER	intergenic_region	85	0	0	97	29	0.302	SNP	6.01667	2
S3673-THY-resent_vs_S3673-TAIL-resent	chr5	125936244	125936244	G	C	Tmem132b-4933438B17Rik	n.125936244G>C	intergenic_region	MODIFIER	intergenic_region	102	0	0	72	15	0.211	SNP	6.15931	2
S3637-THY_vs_S3637-LIVER	chr17	6631519	6631519	G	C	Tmem181c-ps-Dynlt1f	n.6631519G>C	intergenic_region	MODIFIER	intergenic_region	44	0	0	91	38	0.4	SNP	6.02971	2
S3639-THY-resent_vs_S3639-LIVER-resent	chr17	6631519	6631519	G	C	Tmem181c-ps-Dynlt1f	n.6631519G>C	intergenic_region	MODIFIER	intergenic_region	51	0	0	67	33	0.485	SNP	6.67111	2
S3666-THY_vs_S3666-TAIL-resent	chr2	85049313	85049313	G	C	Tnks1bp1	c.-1567G>C	upstream_gene_variant	MODIFIER	transcript	90	0	0	80	28	0.354	SNP	6.23359	2
S3669-THY_vs_S3669-TAIL	chr2	85049313	85049313	G	C	Tnks1bp1	c.-1567G>C	upstream_gene_variant	MODIFIER	transcript	88	0	0	78	43	0.551	SNP	6.00739	2
S3639-THY-resent_vs_S3639-LIVER-resent	chr11	69587631	69587631	C	G	Trp53	c.365C>G	missense_variant&splice_region_variant	MODERATE	transcript	65	1	0.016	108	49	0.454	SNP	5.76548	2
S3673-THY-resent_vs_S3673-TAIL-resent	chr11	69587631	69587631	C	G	Trp53	c.365C>G	missense_variant&splice_region_variant	MODERATE	transcript	90	0	0	83	37	0.444	SNP	5.78647	2
S3666-THY_vs_S3666-TAIL-resent	chr7	44945817	44945817	G	C	Tsks	c.393+1813G>C	intron_variant	MODIFIER	transcript	72	0	0	84	42	0.494	SNP	5.88389	2
S3673-THY-resent_vs_S3673-TAIL-resent	chr7	44945817	44945817	G	C	Tsks	c.393+1813G>C	intron_variant	MODIFIER	transcript	79	0	0	81	30	0.37	SNP	5.97663	2
S3635-THY-resent_vs_S3635-LIVER	chr4	41159404	41159404	C	G	Ube2r2	c.178-14637C>G	intron_variant	MODIFIER	transcript	64	1	0.016	90	36	0.404	SNP	6.10914	2
S3669-THY_vs_S3669-TAIL	chr4	41159404	41159404	C	G	Ube2r2	c.178-14637C>G	intron_variant	MODIFIER	transcript	70	0	0	102	41	0.402	SNP	6.4623	2
S3635-THY-resent_vs_S3635-LIVER	chr2	126783041	126783041	G	C	Usp50	c.68+179C>G	intron_variant	MODIFIER	transcript	66	0	0	74	20	0.27	SNP	5.63655	2
S3666-THY_vs_S3666-TAIL-resent	chr2	126783041	126783041	G	C	Usp50	c.68+179C>G	intron_variant	MODIFIER	transcript	96	0	0	84	30	0.361	SNP	5.87698	2
S3642-THY_vs_S3642-LIVER-resent	chr3	116232186	116232186	C	G	Vcam1-Gpr88	n.116232186C>G	intergenic_region	MODIFIER	intergenic_region	92	1	0.011	77	24	0.312	SNP	6.58486	2
S3669-THY_vs_S3669-TAIL	chr3	116232186	116232186	C	G	Vcam1-Gpr88	n.116232186C>G	intergenic_region	MODIFIER	intergenic_region	86	0	0	94	31	0.323	SNP	6.03265	2
S3642-THY_vs_S3642-LIVER-resent	chr5	109528932	109528932	C	G	Vmn2r17-Crlf2	n.109528932C>G	intergenic_region	MODIFIER	intergenic_region	62	0	0	91	28	0.308	SNP	6.02802	2
S3666-THY_vs_S3666-TAIL-resent	chr5	109528932	109528932	C	G	Vmn2r17-Crlf2	n.109528932C>G	intergenic_region	MODIFIER	intergenic_region	81	0	0	99	43	0.434	SNP	6.42211	2
S3639-THY-resent_vs_S3639-LIVER-resent	chr4	145197579	145197579	C	G	Vps13d-Tnfrsf1b	n.145197579C>G	intergenic_region	MODIFIER	intergenic_region	68	0	0	57	32	0.561	SNP	6.01944	2
S3666-THY_vs_S3666-TAIL-resent	chr4	145197579	145197579	C	G	Vps13d-Tnfrsf1b	n.145197579C>G	intergenic_region	MODIFIER	intergenic_region	88	0	0	76	24	0.315	SNP	6.09379	2
S3637-THY_vs_S3637-LIVER	chr11	109581439	109581439	C	G	Wipi1	c.800+933G>C	intron_variant	MODIFIER	transcript	38	1	0.026	80	37	0.463	SNP	5.8	2
S3669-THY_vs_S3669-TAIL	chr11	109581439	109581439	C	G	Wipi1	c.800+933G>C	intron_variant	MODIFIER	transcript	72	1	0.014	89	35	0.402	SNP	6.00699	2
S3669-THY_vs_S3669-TAIL	chr2	67534541	67534541	G	C	Xirp2-Mir7224	n.67534541G>C	intergenic_region	MODIFIER	intergenic_region	67	1	0.015	77	35	0.461	SNP	6.2402	2
S3673-THY-resent_vs_S3673-TAIL-resent	chr2	67534541	67534541	G	C	Xirp2-Mir7224	n.67534541G>C	intergenic_region	MODIFIER	intergenic_region	66	1	0.015	59	13	0.22	SNP	3.53444	2
S3669-THY_vs_S3669-TAIL	chr4	137143279	137143279	C	G	Zbtb40-Gm13003	n.137143279C>G	intergenic_region	MODIFIER	intergenic_region	75	1	0.013	102	30	0.294	SNP	6.41832	2
S3673-THY-resent_vs_S3673-TAIL-resent	chr4	137143279	137143279	C	G	Zbtb40-Gm13003	n.137143279C>G	intergenic_region	MODIFIER	intergenic_region	92	1	0.011	71	31	0.429	SNP	6.21324	2
S3600-THY_vs_S3600-LIVER-resent	chr2	170183671	170183671	C	G	Zfp217-Bcas1	n.170183671C>G	intergenic_region	MODIFIER	intergenic_region	80	0	0	116	28	0.241	SNP	6.54999	2
S3642-THY_vs_S3642-LIVER-resent	chr2	170183671	170183671	C	G	Zfp217-Bcas1	n.170183671C>G	intergenic_region	MODIFIER	intergenic_region	70	1	0.014	92	24	0.261	SNP	5.35182	2
S3669-THY_vs_S3669-TAIL	chr2	170231131	170231131	G	C	Zfp217-Bcas1	n.170231131G>C	intergenic_region	MODIFIER	intergenic_region	77	0	0	80	38	0.475	SNP	6.25339	2
S3673-THY-resent_vs_S3673-TAIL-resent	chr2	170231131	170231131	G	C	Zfp217-Bcas1	n.170231131G>C	intergenic_region	MODIFIER	intergenic_region	88	0	0	74	18	0.247	SNP	6.6778	2
S3642-THY_vs_S3642-LIVER-resent	chrX	21084131	21084131	C	G	Zfp300	c.139+85G>C	intron_variant	MODIFIER	transcript	57	1	0.018	79	27	0.346	SNP	5.67439	2
S3669-THY_vs_S3669-TAIL	chrX	21084131	21084131	C	G	Zfp300	c.139+85G>C	intron_variant	MODIFIER	transcript	52	0	0	92	39	0.424	SNP	5.92527	2
S3666-THY_vs_S3666-TAIL-resent	chr18	5360678	5360678	G	C	Zfp438-Gm10125	n.5360678G>C	intergenic_region	MODIFIER	intergenic_region	124	0	0	88	28	0.31	SNP	6.37962	2
S3673-THY-resent_vs_S3673-TAIL-resent	chr18	5360678	5360678	G	C	Zfp438-Gm10125	n.5360678G>C	intergenic_region	MODIFIER	intergenic_region	106	1	0.009709	90	42	0.46	SNP	5.83177	2
S3639-THY-resent_vs_S3639-LIVER-resent	chr5	6766597	6766597	C	G	Zfp804b	c.*2433G>C	downstream_gene_variant	MODIFIER	transcript	55	1	0.019	75	21	0.28	SNP	4.48778	2
S3669-THY_vs_S3669-TAIL	chr5	6766597	6766597	C	G	Zfp804b	c.*2433G>C	downstream_gene_variant	MODIFIER	transcript	79	0	0	66	20	0.308	SNP	6.09631	2
S3600-THY_vs_S3600-LIVER-resent	chr13	62265573	62265573	C	G	Zfp808-Gm3604	n.62265573C>G	intergenic_region	MODIFIER	intergenic_region	44	0	0	75	39	0.52	SNP	6.20913	2
S3642-THY_vs_S3642-LIVER-resent	chr13	62265573	62265573	C	G	Zfp808-Gm3604	n.62265573C>G	intergenic_region	MODIFIER	intergenic_region	62	1	0.016	51	12	0.235	SNP	3.3141	2
S3637-THY_vs_S3637-LIVER	chr2	165887083	165887083	C	G	Zmynd8	c.-2462G>C	upstream_gene_variant	MODIFIER	transcript	35	0	0	92	37	0.396	SNP	5.91441	2
S3642-THY_vs_S3642-LIVER-resent	chr2	165887083	165887083	C	G	Zmynd8	c.-2462G>C	upstream_gene_variant	MODIFIER	transcript	35	1	0.029	31	7	0.226	SNP	1.66766	2
