# Supplementary material for: 5-Aza-4’-thio-2’-deoxycytidine induces C&gt;G transversions in a specific trinucleotide context and leads to acute lymphoid leukemia
Source: Research Square preprint supplement (doi:10.21203/rs.3.rs-3186246/v1), 2023-12-19
Supplement: Supplementary file 13 [file f9b0140327e94865da783291.xlsx]

## Sheet: Sheet1
SampleName	Chr	Start	End	REF	ALT	Gene_Name	HGVS.c	Annotation	Annotation_Impact	Feature_Type	DP_NORMAL	AD_NORMAL.2	AF_NORMAL	DP_TUMOR	AD_TUMOR.2	AF_TUMOR	VariantType	LOG_FISHER
S3600-THY_vs_S3600-LIVER-resent	chr1	3186120	3186120	G	C	CHR_START-Xkr4	n.3186120G>C	intergenic_region	MODIFIER	intergenic_region	63	0	0	84	46	0.554	SNP	6.18917
S3600-THY_vs_S3600-LIVER-resent	chr1	3886750	3886750	G	GTAGA	Xkr4-Rp1	n.3886750_3886751insTAGA	intergenic_region	MODIFIER	intergenic_region	41	0	0	67	29	0.433	INSERTION.NumRepetitions_10orMore.EventLength_4	6.75259
S3600-THY_vs_S3600-LIVER-resent	chr1	4401050	4401050	C	G	Rp1	n.4401050G>C	intragenic_variant	MODIFIER	gene_variant	29	0	0	35	21	0.6	SNP	6.44979
S3600-THY_vs_S3600-LIVER-resent	chr1	4449016	4449016	T	TGATA	Rp1-Sox17	n.4449016_4449017insGATA	intergenic_region	MODIFIER	intergenic_region	28	0	0	43	19	0.452	INSERTION.NumRepetitions_10orMore.EventLength_4	4.86024
S3600-THY_vs_S3600-LIVER-resent	chr1	4466696	4466697	CA	C	Rp1-Sox17	n.4466697delA	intergenic_region	MODIFIER	intergenic_region	72	0	0	103	26	0.257	DELETION.NumRepetitions_10orMore.EventLength_1.RepeatExpansion_A	5.84988
S3600-THY_vs_S3600-LIVER-resent	chr1	4688448	4688448	C	G	Sox17-Mrpl15	n.4688448C>G	intergenic_region	MODIFIER	intergenic_region	67	0	0	105	58	0.539	SNP	5.99384
S3600-THY_vs_S3600-LIVER-resent	chr1	4779182	4779182	C	G	Mrpl15	c.427-1534G>C	intron_variant	MODIFIER	transcript	47	0	0	45	21	0.467	SNP	6.23846
S3600-THY_vs_S3600-LIVER-resent	chr1	4912072	4912072	C	G	Rgs20	c.930+242G>C	intron_variant	MODIFIER	transcript	80	0	0	105	50	0.476	SNP	6.1585
S3600-THY_vs_S3600-LIVER-resent	chr1	4982505	4982505	G	C	Rgs20	c.468+38233C>G	intron_variant	MODIFIER	transcript	58	0	0	88	21	0.241	SNP	4.90304
S3600-THY_vs_S3600-LIVER-resent	chr1	5496175	5496175	C	G	Atp6v1h-Oprk1	n.5496175C>G	intergenic_region	MODIFIER	intergenic_region	53	1	0.019	94	45	0.479	SNP	5.71264
S3600-THY_vs_S3600-LIVER-resent	chr1	6033846	6033846	G	C	Npbwr1-Rb1cc1	n.6033846G>C	intergenic_region	MODIFIER	intergenic_region	61	0	0	98	21	0.216	SNP	4.74923
S3600-THY_vs_S3600-LIVER-resent	chr1	6326653	6326653	C	G	Rb1cc1-Fam150a	n.6326653C>G	intergenic_region	MODIFIER	intergenic_region	55	0	0	85	37	0.435	SNP	6.49443
S3600-THY_vs_S3600-LIVER-resent	chr1	6644867	6644867	C	G	St18	c.-121-92713C>G	intron_variant	MODIFIER	transcript	56	0	0	101	51	0.505	SNP	5.96424
S3600-THY_vs_S3600-LIVER-resent	chr1	7025949	7025949	C	G	St18-Pcmtd1	n.7025949C>G	intergenic_region	MODIFIER	intergenic_region	50	0	0	77	31	0.403	SNP	5.93021
S3600-THY_vs_S3600-LIVER-resent	chr1	7115048	7115048	C	G	Pcmtd1	c.-115-5146C>G	intron_variant	MODIFIER	transcript	66	0	0	95	43	0.457	SNP	6.35251
S3600-THY_vs_S3600-LIVER-resent	chr1	7135095	7135095	C	G	Pcmtd1	c.308-12542C>G	intron_variant	MODIFIER	transcript	59	0	0	91	47	0.528	SNP	6.21192
S3600-THY_vs_S3600-LIVER-resent	chr1	7272692	7272692	C	G	Pcmtd1-Sntg1	n.7272692C>G	intergenic_region	MODIFIER	intergenic_region	61	0	0	104	44	0.423	SNP	5.95731
S3600-THY_vs_S3600-LIVER-resent	chr1	7563979	7563979	C	G	Pcmtd1-Sntg1	n.7563979C>G	intergenic_region	MODIFIER	intergenic_region	70	0	0	91	43	0.467	SNP	6.23716
S3600-THY_vs_S3600-LIVER-resent	chr1	7915077	7915077	G	GGGC	Pcmtd1-Sntg1	n.7915077_7915078insGGC	intergenic_region	MODIFIER	intergenic_region	16	0	0	29	6	0.207	INSERTION.NOVEL_3	1.12578
S3600-THY_vs_S3600-LIVER-resent	chr1	8133528	8133528	C	G	Pcmtd1-Sntg1	n.8133528C>G	intergenic_region	MODIFIER	intergenic_region	79	0	0	114	32	0.283	SNP	6.19556
S3600-THY_vs_S3600-LIVER-resent	chr1	8291113	8291113	C	A	Pcmtd1-Sntg1	n.8291113C>A	intergenic_region	MODIFIER	intergenic_region	31	0	0	33	13	0.394	SNP	4.22672
S3600-THY_vs_S3600-LIVER-resent	chr1	8962100	8962100	G	C	Sntg1	c.-28+37086C>G	intron_variant	MODIFIER	transcript	73	0	0	106	47	0.443	SNP	6.19387
S3600-THY_vs_S3600-LIVER-resent	chr1	9101662	9101663	TA	T	Sntg1	c.-92+101516delT	intron_variant	MODIFIER	transcript	50	0	0	76	23	0.303	DELETION.NumRepetitions_8.EventLength_1.RepeatExpansion_A	5.65359
S3600-THY_vs_S3600-LIVER-resent	chr1	9300085	9300085	C	G	Sntg1	c.-496142G>C	upstream_gene_variant	MODIFIER	transcript	83	0	0	116	53	0.456	SNP	6.23757
S3600-THY_vs_S3600-LIVER-resent	chr1	9380836	9380836	C	G	Sntg1-Rrs1	n.9380836C>G	intergenic_region	MODIFIER	intergenic_region	44	0	0	99	52	0.52	SNP	6.38127
S3600-THY_vs_S3600-LIVER-resent	chr1	9445128	9445128	C	G	Sntg1-Rrs1	n.9445128C>G	intergenic_region	MODIFIER	intergenic_region	63	1	0.016	111	50	0.459	SNP	5.78972
S3600-THY_vs_S3600-LIVER-resent	chr1	9557714	9557714	C	G	2610203C22Rik	n.*3119G>C	downstream_gene_variant	MODIFIER	transcript	85	0	0	100	59	0.586	SNP	5.82227
S3600-THY_vs_S3600-LIVER-resent	chr1	9951706	9951706	G	C	Snhg6-Tcf24	n.9951706G>C	intergenic_region	MODIFIER	intergenic_region	90	1	0.011	96	39	0.406	SNP	5.77821
S3600-THY_vs_S3600-LIVER-resent	chr1	9964533	9964533	G	C	Ppp1r42	c.*4287C>G	downstream_gene_variant	MODIFIER	transcript	82	0	0	134	59	0.447	SNP	5.79872
S3600-THY_vs_S3600-LIVER-resent	chr1	10454613	10454613	A	AT	Cpa6	c.639+22411_639+22412insA	intron_variant	MODIFIER	transcript	55	0	0	99	43	0.439	INSERTION.NumRepetitions_8.EventLength_1.RepeatExpansion_T	5.86939
S3600-THY_vs_S3600-LIVER-resent	chr1	10590805	10590805	C	G	Cpa6	c.192+4815G>C	intron_variant	MODIFIER	transcript	57	0	0	97	51	0.526	SNP	5.99829
S3600-THY_vs_S3600-LIVER-resent	chr1	10627136	10627136	C	G	Cpa6	c.117-31441G>C	intron_variant	MODIFIER	transcript	99	0	0	114	53	0.465	SNP	5.92261
S3600-THY_vs_S3600-LIVER-resent	chr1	10703229	10703229	C	G	Cpa6	c.116+16383G>C	intron_variant	MODIFIER	transcript	51	1	0.02	98	48	0.485	SNP	5.98618
S3600-THY_vs_S3600-LIVER-resent	chr1	10735851	10735851	C	G	Mir467e	n.18-21455G>C	intron_variant	MODIFIER	transcript	91	0	0	97	45	0.463	SNP	5.98772
S3600-THY_vs_S3600-LIVER-resent	chr1	10769013	10769013	C	G	Mir467e	n.18-54617G>C	intron_variant	MODIFIER	transcript	58	0	0	99	57	0.571	SNP	6.04316
S3600-THY_vs_S3600-LIVER-resent	chr1	10805585	10805585	C	G	Mir467e	n.17+60253G>C	intron_variant	MODIFIER	transcript	80	1	0.013	109	40	0.367	SNP	6.166
S3600-THY_vs_S3600-LIVER-resent	chr1	10842936	10842936	C	G	Mir467e	n.17+22902G>C	intron_variant	MODIFIER	transcript	63	0	0	88	42	0.465	SNP	6.00973
S3600-THY_vs_S3600-LIVER-resent	chr1	10863921	10863921	C	G	Mir467e	n.17+1917G>C	intron_variant	MODIFIER	transcript	63	0	0	95	42	0.442	SNP	5.98486
S3600-THY_vs_S3600-LIVER-resent	chr1	10915576	10915576	C	G	Mir467e-Prex2	n.10915576C>G	intergenic_region	MODIFIER	intergenic_region	68	0	0	108	50	0.463	SNP	6.06154
S3600-THY_vs_S3600-LIVER-resent	chr1	10933920	10933920	C	G	Mir467e-Prex2	n.10933920C>G	intergenic_region	MODIFIER	intergenic_region	71	1	0.014	108	50	0.458	SNP	5.91609
S3600-THY_vs_S3600-LIVER-resent	chr1	10936337	10936337	C	T	Mir467e-Prex2	n.10936337C>T	intergenic_region	MODIFIER	intergenic_region	66	0	0	128	65	0.516	SNP	6.06216
S3600-THY_vs_S3600-LIVER-resent	chr1	10977426	10977426	C	G	Mir467e-Prex2	n.10977426C>G	intergenic_region	MODIFIER	intergenic_region	70	0	0	98	45	0.457	SNP	6.03118
S3600-THY_vs_S3600-LIVER-resent	chr1	11164698	11164698	C	G	Prex2	c.2691+2297C>G	intron_variant	MODIFIER	transcript	72	0	0	84	38	0.458	SNP	6.29421
S3600-THY_vs_S3600-LIVER-resent	chr1	11213097	11213097	C	G	Prex2	c.4207+4442C>G	intron_variant	MODIFIER	transcript	60	0	0	105	42	0.4	SNP	6.16761
S3600-THY_vs_S3600-LIVER-resent	chr1	11287905	11287905	C	G	Prex2	c.4684-1348C>G	intron_variant	MODIFIER	transcript	76	0	0	119	62	0.53	SNP	5.83934
S3600-THY_vs_S3600-LIVER-resent	chr1	11346946	11346946	C	G	Prex2-A830018L16Rik	n.11346946C>G	intergenic_region	MODIFIER	intergenic_region	54	0	0	105	54	0.514	SNP	5.96554
S3600-THY_vs_S3600-LIVER-resent	chr1	11369827	11369827	C	G	Prex2-A830018L16Rik	n.11369827C>G	intergenic_region	MODIFIER	intergenic_region	69	0	0	106	45	0.425	SNP	6.0548
S3600-THY_vs_S3600-LIVER-resent	chr1	11429769	11429769	C	G	A830018L16Rik	c.69+15132C>G	intron_variant	MODIFIER	transcript	59	0	0	105	49	0.471	SNP	6.09628
S3600-THY_vs_S3600-LIVER-resent	chr1	11598962	11598962	G	C	A830018L16Rik	c.847+2645G>C	intron_variant	MODIFIER	transcript	49	0	0	98	21	0.216	SNP	3.971
S3600-THY_vs_S3600-LIVER-resent	chr1	12060538	12060538	C	G	A830018L16Rik-Mir6341	n.12060538C>G	intergenic_region	MODIFIER	intergenic_region	51	0	0	97	47	0.49	SNP	6.18057
S3600-THY_vs_S3600-LIVER-resent	chr1	12221518	12221518	C	G	A830018L16Rik-Mir6341	n.12221518C>G	intergenic_region	MODIFIER	intergenic_region	58	0	0	91	45	0.495	SNP	5.89842
S3600-THY_vs_S3600-LIVER-resent	chr1	12245501	12245501	C	G	A830018L16Rik-Mir6341	n.12245501C>G	intergenic_region	MODIFIER	intergenic_region	60	0	0	89	42	0.477	SNP	6.14958
S3600-THY_vs_S3600-LIVER-resent	chr1	12263106	12263106	C	T	A830018L16Rik-Mir6341	n.12263106C>T	intergenic_region	MODIFIER	intergenic_region	58	0	0	103	51	0.495	SNP	5.95573
S3600-THY_vs_S3600-LIVER-resent	chr1	12596141	12596141	C	G	Mir6341-Gm17644	n.12596141C>G	intergenic_region	MODIFIER	intergenic_region	66	0	0	124	57	0.46	SNP	6.06165
S3600-THY_vs_S3600-LIVER-resent	chr1	12784804	12784804	C	G	Sulf1	c.-132-1275C>G	intron_variant	MODIFIER	transcript	73	0	0	88	33	0.375	SNP	5.95203
S3600-THY_vs_S3600-LIVER-resent	chr1	12846412	12846412	C	T	Sulf1	c.2282-1683C>T	intron_variant	MODIFIER	transcript	64	1	0.016	97	53	0.546	SNP	5.93424
S3600-THY_vs_S3600-LIVER-resent	chr1	12855953	12855953	C	G	Sulf1	c.2583-2859C>G	intron_variant	MODIFIER	transcript	72	0	0	108	58	0.537	SNP	6.21164
S3600-THY_vs_S3600-LIVER-resent	chr1	12902579	12902579	C	G	Slco5a1	c.1427-7954G>C	intron_variant	MODIFIER	transcript	70	0	0	72	28	0.394	SNP	6.54146
S3600-THY_vs_S3600-LIVER-resent	chr1	12951348	12951348	C	G	Slco5a1	c.917-7236G>C	intron_variant	MODIFIER	transcript	78	0	0	105	49	0.467	SNP	6.28135
S3600-THY_vs_S3600-LIVER-resent	chr1	12972957	12972957	T	TGATA	Slco5a1	c.916+16622_916+16623insTATC	intron_variant	MODIFIER	transcript	46	0	0	58	17	0.305	INSERTION.NumRepetitions_10orMore.EventLength_4	4.7283
S3600-THY_vs_S3600-LIVER-resent	chr1	13007344	13007345	CT	C	Slco5a1-Prdm14	n.13007345delT	intergenic_region	MODIFIER	intergenic_region	49	0	0	94	30	0.323	DELETION.NumRepetitions_10orMore.EventLength_1.RepeatExpansion_T	5.83992
S3600-THY_vs_S3600-LIVER-resent	chr1	13069722	13069722	C	G	Slco5a1-Prdm14	n.13069722C>G	intergenic_region	MODIFIER	intergenic_region	61	1	0.017	90	47	0.517	SNP	6.0007
S3600-THY_vs_S3600-LIVER-resent	chr1	13140320	13140320	C	G	Ncoa2	c.*2441G>C	3_prime_UTR_variant	MODIFIER	transcript	69	0	0	102	49	0.485	SNP	5.72252
S3600-THY_vs_S3600-LIVER-resent	chr1	13140803	13140803	C	G	Ncoa2	c.*1958G>C	3_prime_UTR_variant	MODIFIER	transcript	74	0	0	103	55	0.535	SNP	5.92633
S3600-THY_vs_S3600-LIVER-resent	chr1	13156336	13156336	C	G	Ncoa2	c.3324+34G>C	intron_variant	MODIFIER	transcript	82	0	0	118	59	0.5	SNP	5.84577
S3600-THY_vs_S3600-LIVER-resent	chr1	13157908	13157908	C	G	Ncoa2	c.3159-1373G>C	intron_variant	MODIFIER	transcript	92	0	0	122	58	0.479	SNP	6.03557
S3600-THY_vs_S3600-LIVER-resent	chr1	13164697	13164697	C	T	Ncoa2	c.2812+199G>A	intron_variant	MODIFIER	transcript	85	0	0	122	50	0.42	SNP	6.04659
S3600-THY_vs_S3600-LIVER-resent	chr1	13288360	13288360	C	G	Ncoa2	c.-76-2335G>C	intron_variant	MODIFIER	transcript	77	1	0.013	99	39	0.388	SNP	5.90089
S3600-THY_vs_S3600-LIVER-resent	chr1	13998304	13998304	C	G	Gm5523-Eya1	n.13998304C>G	intergenic_region	MODIFIER	intergenic_region	73	0	0	115	47	0.407	SNP	6.18179
S3600-THY_vs_S3600-LIVER-resent	chr1	14032744	14032744	C	G	Gm5523-Eya1	n.14032744C>G	intergenic_region	MODIFIER	intergenic_region	53	0	0	88	45	0.506	SNP	6.19219
S3600-THY_vs_S3600-LIVER-resent	chr1	14108783	14108783	C	G	Gm5523-Eya1	n.14108783C>G	intergenic_region	MODIFIER	intergenic_region	50	0	0	99	53	0.541	SNP	6.2851
S3600-THY_vs_S3600-LIVER-resent	chr1	14156484	14156484	C	G	Gm5523-Eya1	n.14156484C>G	intergenic_region	MODIFIER	intergenic_region	99	0	0	124	56	0.455	SNP	6.0718
S3600-THY_vs_S3600-LIVER-resent	chr1	14264212	14264212	C	G	Eya1	c.553+6493G>C	intron_variant	MODIFIER	transcript	69	0	0	99	48	0.485	SNP	5.80472
S3600-THY_vs_S3600-LIVER-resent	chr1	14313265	14313265	C	G	Eya1	c.-10372G>C	upstream_gene_variant	MODIFIER	transcript	73	0	0	110	50	0.459	SNP	5.90968
S3600-THY_vs_S3600-LIVER-resent	chr1	14580628	14580628	C	G	Eya1-Msc	n.14580628C>G	intergenic_region	MODIFIER	intergenic_region	76	0	0	93	43	0.462	SNP	5.67174
S3600-THY_vs_S3600-LIVER-resent	chr1	14717862	14717862	G	C	Eya1-Msc	n.14717862G>C	intergenic_region	MODIFIER	intergenic_region	46	0	0	93	43	0.462	SNP	5.84379
S3600-THY_vs_S3600-LIVER-resent	chr1	14763043	14763043	C	G	Msc-Trpa1	n.14763043C>G	intergenic_region	MODIFIER	intergenic_region	62	0	0	88	54	0.614	SNP	6.09737
S3600-THY_vs_S3600-LIVER-resent	chr1	14889113	14889113	C	G	Trpa1	c.2067+281G>C	intron_variant	MODIFIER	transcript	80	1	0.013	100	41	0.404	SNP	6.10632
S3600-THY_vs_S3600-LIVER-resent	chr1	14904158	14904158	C	G	Trpa1	c.799G>C	missense_variant	MODERATE	transcript	74	1	0.014	93	39	0.424	SNP	6.48663
S3600-THY_vs_S3600-LIVER-resent	chr1	14908902	14908902	C	T	Trpa1	c.447+1828G>A	intron_variant	MODIFIER	transcript	79	0	0	77	38	0.5	SNP	6.21853
S3600-THY_vs_S3600-LIVER-resent	chr1	15006173	15006173	C	G	Trpa1-Kcnb2	n.15006173C>G	intergenic_region	MODIFIER	intergenic_region	54	0	0	111	49	0.445	SNP	5.94576
S3600-THY_vs_S3600-LIVER-resent	chr1	15008552	15008552	C	G	Trpa1-Kcnb2	n.15008552C>G	intergenic_region	MODIFIER	intergenic_region	65	0	0	109	55	0.505	SNP	6.25446
S3600-THY_vs_S3600-LIVER-resent	chr1	15234693	15234693	C	G	Trpa1-Kcnb2	n.15234693C>G	intergenic_region	MODIFIER	intergenic_region	62	0	0	92	41	0.451	SNP	5.76017
S3600-THY_vs_S3600-LIVER-resent	chr1	15374027	15374027	C	T	Kcnb2	c.579+60997C>T	intron_variant	MODIFIER	transcript	54	0	0	114	55	0.482	SNP	5.96495
S3600-THY_vs_S3600-LIVER-resent	chr1	15399512	15399512	T	TAGAA	Kcnb2	c.579+86482_579+86483insAGAA	intron_variant	MODIFIER	transcript	43	0	0	54	26	0.481	INSERTION.NumRepetitions_10orMore.EventLength_4	6.45109
S3600-THY_vs_S3600-LIVER-resent	chr1	15439953	15439953	C	G	Kcnb2	c.579+126923C>G	intron_variant	MODIFIER	transcript	58	0	0	118	62	0.525	SNP	6.19181
S3600-THY_vs_S3600-LIVER-resent	chr1	15504182	15504182	G	C	Kcnb2	c.579+191152G>C	intron_variant	MODIFIER	transcript	47	0	0	83	36	0.439	SNP	6.51447
S3600-THY_vs_S3600-LIVER-resent	chr1	15538643	15538643	C	G	Kcnb2	c.580-170842C>G	intron_variant	MODIFIER	transcript	48	0	0	119	58	0.487	SNP	6.21468
S3600-THY_vs_S3600-LIVER-resent	chr1	15554372	15554372	C	G	Kcnb2	c.580-155113C>G	intron_variant	MODIFIER	transcript	64	0	0	111	50	0.45	SNP	6.20163
S3600-THY_vs_S3600-LIVER-resent	chr1	15707422	15707422	C	G	Kcnb2	c.580-2063C>G	intron_variant	MODIFIER	transcript	72	0	0	99	42	0.424	SNP	6.29111
S3600-THY_vs_S3600-LIVER-resent	chr1	15728846	15728846	C	G	Kcnb2-Terf1	n.15728846C>G	intergenic_region	MODIFIER	intergenic_region	63	0	0	104	47	0.455	SNP	6.07225
S3600-THY_vs_S3600-LIVER-resent	chr1	15968903	15968903	C	T	Sbspon-4930444P10Rik	n.15968903C>T	intergenic_region	MODIFIER	intergenic_region	57	0	0	92	33	0.359	SNP	5.97283
S3600-THY_vs_S3600-LIVER-resent	chr1	16012864	16012864	C	G	Sbspon-4930444P10Rik	n.16012864C>G	intergenic_region	MODIFIER	intergenic_region	63	0	0	99	52	0.525	SNP	6.1276
S3600-THY_vs_S3600-LIVER-resent	chr1	16036237	16036237	C	G	Sbspon-4930444P10Rik	n.16036237C>G	intergenic_region	MODIFIER	intergenic_region	67	0	0	118	51	0.427	SNP	5.94043
S3600-THY_vs_S3600-LIVER-resent	chr1	16036375	16036375	C	G	Sbspon-4930444P10Rik	n.16036375C>G	intergenic_region	MODIFIER	intergenic_region	54	0	0	127	63	0.492	SNP	5.98412
S3600-THY_vs_S3600-LIVER-resent	chr1	16067712	16067712	C	G	4930444P10Rik	c.316+1088G>C	intron_variant	MODIFIER	transcript	60	0	0	101	44	0.436	SNP	5.93323
S3600-THY_vs_S3600-LIVER-resent	chr1	16110588	16110588	C	G	Rdh10	c.525+2558C>G	intron_variant	MODIFIER	transcript	84	0	0	116	64	0.548	SNP	5.88553
S3600-THY_vs_S3600-LIVER-resent	chr1	16114987	16114987	C	G	Rdh10	c.525+6957C>G	intron_variant	MODIFIER	transcript	67	0	0	125	53	0.424	SNP	6.37008
S3600-THY_vs_S3600-LIVER-resent	chr1	16202997	16202997	C	G	Rdh10-Stau2	n.16202997C>G	intergenic_region	MODIFIER	intergenic_region	70	0	0	98	56	0.567	SNP	5.65566
S3600-THY_vs_S3600-LIVER-resent	chr1	16320382	16320382	C	G	Stau2	c.1530+25322G>C	intron_variant	MODIFIER	transcript	54	0	0	89	49	0.551	SNP	6.30676
S3600-THY_vs_S3600-LIVER-resent	chr1	16503664	16503664	A	ACG	Stau2	c.-18+5677_-18+5678insCG	intron_variant	MODIFIER	transcript	20	0	0	18	6	0.333	INSERTION.NOVEL_2	2.17234
S3600-THY_vs_S3600-LIVER-resent	chr1	16877746	16877746	C	G	Ly96-Jph1	n.16877746C>G	intergenic_region	MODIFIER	intergenic_region	65	0	0	101	48	0.475	SNP	5.91367
S3600-THY_vs_S3600-LIVER-resent	chr1	17057944	17057944	C	G	Jph1	c.1139+33354G>C	intron_variant	MODIFIER	transcript	56	0	0	98	51	0.515	SNP	6.08109
S3600-THY_vs_S3600-LIVER-resent	chr1	17178546	17178546	C	G	Gdap1-Pi15	n.17178546C>G	intergenic_region	MODIFIER	intergenic_region	62	0	0	89	40	0.455	SNP	5.82293
S3600-THY_vs_S3600-LIVER-resent	chr1	18161055	18161056	GT	G	Crisp4-Defb44-ps	n.18161056delT	intergenic_region	MODIFIER	intergenic_region	47	0	0	95	20	0.215	DELETION.NumRepetitions_9.EventLength_1.RepeatExpansion_T	3.70777
S3600-THY_vs_S3600-LIVER-resent	chr1	18808952	18808953	CT	C	Defb41-Tfap2d	n.18808953delT	intergenic_region	MODIFIER	intergenic_region	41	0	0	98	27	0.276	DELETION.NumRepetitions_10orMore.EventLength_1.RepeatExpansion_T	4.51113
S3600-THY_vs_S3600-LIVER-resent	chr1	19172453	19172453	C	G	Tfap2d-Tfap2b	n.19172453C>G	intergenic_region	MODIFIER	intergenic_region	65	0	0	110	53	0.477	SNP	5.86383
S3600-THY_vs_S3600-LIVER-resent	chr1	19346139	19346139	C	G	Tfap2b-Pkhd1	n.19346139C>G	intergenic_region	MODIFIER	intergenic_region	51	0	0	90	52	0.578	SNP	6.30251
S3600-THY_vs_S3600-LIVER-resent	chr1	19601436	19601436	C	G	Tfap2b-Pkhd1	n.19601436C>G	intergenic_region	MODIFIER	intergenic_region	63	0	0	94	50	0.532	SNP	6.26421
S3600-THY_vs_S3600-LIVER-resent	chr1	19701280	19701280	A	AT	Tfap2b-Pkhd1	n.19701280_19701281insT	intergenic_region	MODIFIER	intergenic_region	41	0	0	91	39	0.433	INSERTION.NumRepetitions_8.EventLength_1.RepeatExpansion_T	6.09637
S3600-THY_vs_S3600-LIVER-resent	chr1	20342515	20342515	G	C	Pkhd1	c.7715+4696C>G	intron_variant	MODIFIER	transcript	50	0	0	117	53	0.443	SNP	5.95109
S3600-THY_vs_S3600-LIVER-resent	chr1	20484975	20484975	T	TTATATA	Pkhd1	c.5739+17966_5739+17967insTATATA	intron_variant	MODIFIER	transcript	9	0	0	10	10	1	INSERTION.NumRepetitions_10orMore.EventLength_2.RepeatExpansion_TA	4.96557
S3600-THY_vs_S3600-LIVER-resent	chr1	20502986	20502986	C	G	Pkhd1	c.5695G>C	missense_variant	MODERATE	transcript	60	0	0	91	43	0.467	SNP	6.10007
S3600-THY_vs_S3600-LIVER-resent	chr1	20606689	20606689	C	T	Pkhd1	c.384+1630G>A	intron_variant	MODIFIER	transcript	52	0	0	98	47	0.474	SNP	6.09087
S3600-THY_vs_S3600-LIVER-resent	chr1	20769192	20769192	C	G	Il17a-Il17f	n.20769192C>G	intergenic_region	MODIFIER	intergenic_region	59	0	0	103	50	0.495	SNP	5.91038
S3600-THY_vs_S3600-LIVER-resent	chr1	20789569	20789569	C	G	Il17f-Mcm3	n.20789569C>G	intergenic_region	MODIFIER	intergenic_region	77	0	0	104	52	0.5	SNP	5.99609
S3600-THY_vs_S3600-LIVER-resent	chr1	20842240	20842240	C	G	Mcm3-6720483E21Rik	n.20842240C>G	intergenic_region	MODIFIER	intergenic_region	71	0	0	126	61	0.484	SNP	6.05845
S3600-THY_vs_S3600-LIVER-resent	chr1	21405364	21405364	G	C	Kcnq5	c.1770-306C>G	intron_variant	MODIFIER	transcript	65	0	0	130	62	0.473	SNP	5.87315
S3600-THY_vs_S3600-LIVER-resent	chr1	21495671	21495671	G	C	Kcnq5	c.922-8338C>G	intron_variant	MODIFIER	transcript	71	1	0.014	80	24	0.304	SNP	6.05431
S3600-THY_vs_S3600-LIVER-resent	chr1	21734664	21734664	G	C	Kcnq5	c.402-141050C>G	intron_variant	MODIFIER	transcript	65	0	0	105	56	0.524	SNP	5.77021
S3600-THY_vs_S3600-LIVER-resent	chr1	21811379	21811379	C	G	Kcnq5	c.401+149802G>C	intron_variant	MODIFIER	transcript	67	0	0	99	49	0.5	SNP	5.78475
S3600-THY_vs_S3600-LIVER-resent	chr1	21842268	21842268	C	G	Kcnq5	c.401+118913G>C	intron_variant	MODIFIER	transcript	77	0	0	111	56	0.509	SNP	5.7712
S3600-THY_vs_S3600-LIVER-resent	chr1	21866773	21866773	C	G	Kcnq5	c.401+94408G>C	intron_variant	MODIFIER	transcript	33	0	0	51	26	0.51	SNP	6.48983
S3600-THY_vs_S3600-LIVER-resent	chr1	22159513	22159513	C	T	Kcnq5-Rims1	n.22159513C>T	intergenic_region	MODIFIER	intergenic_region	68	0	0	113	65	0.571	SNP	5.96813
S3600-THY_vs_S3600-LIVER-resent	chr1	22175970	22175970	C	G	Kcnq5-Rims1	n.22175970C>G	intergenic_region	MODIFIER	intergenic_region	71	0	0	108	50	0.463	SNP	5.92697
S3600-THY_vs_S3600-LIVER-resent	chr1	22207820	22207820	C	G	Kcnq5-Rims1	n.22207820C>G	intergenic_region	MODIFIER	intergenic_region	37	0	0	72	22	0.306	SNP	4.47679
S3600-THY_vs_S3600-LIVER-resent	chr1	22228726	22228726	C	G	Kcnq5-Rims1	n.22228726C>G	intergenic_region	MODIFIER	intergenic_region	56	0	0	75	35	0.459	SNP	6.11578
S3600-THY_vs_S3600-LIVER-resent	chr1	22250708	22250708	C	G	Kcnq5-Rims1	n.22250708C>G	intergenic_region	MODIFIER	intergenic_region	65	0	0	115	51	0.442	SNP	5.71944
S3600-THY_vs_S3600-LIVER-resent	chr1	22353124	22353124	C	G	Rims1	c.1239-6596G>C	intron_variant	MODIFIER	transcript	83	0	0	119	53	0.44	SNP	5.84601
S3600-THY_vs_S3600-LIVER-resent	chr1	22774866	22774866	G	C	Rims1	c.164+30695C>G	intron_variant	MODIFIER	transcript	66	0	0	86	20	0.241	SNP	5.38589
S3600-THY_vs_S3600-LIVER-resent	chr1	23251736	23251736	C	G	4933415F23Rik-Mir30a	n.23251736C>G	intergenic_region	MODIFIER	intergenic_region	62	0	0	91	39	0.42	SNP	5.96432
S3600-THY_vs_S3600-LIVER-resent	chr1	23294907	23294907	C	G	Mir30c-2	n.*3123C>G	downstream_gene_variant	MODIFIER	transcript	62	0	0	115	46	0.4	SNP	5.82279
S3600-THY_vs_S3600-LIVER-resent	chr1	23375260	23375260	C	G	Ogfrl1	c.695+470G>C	intron_variant	MODIFIER	transcript	74	0	0	98	37	0.378	SNP	5.89099
S3600-THY_vs_S3600-LIVER-resent	chr1	23968271	23968271	C	G	Smap1-Sdhaf4	n.23968271C>G	intergenic_region	MODIFIER	intergenic_region	60	0	0	107	54	0.5	SNP	6.06341
S3600-THY_vs_S3600-LIVER-resent	chr1	23976027	23976027	C	T	Smap1-Sdhaf4	n.23976027C>T	intergenic_region	MODIFIER	intergenic_region	90	0	0	102	44	0.431	SNP	6.11144
S3600-THY_vs_S3600-LIVER-resent	chr1	23989098	23989098	C	G	Smap1-Sdhaf4	n.23989098C>G	intergenic_region	MODIFIER	intergenic_region	55	0	0	77	31	0.408	SNP	6.19208
S3600-THY_vs_S3600-LIVER-resent	chr1	24065587	24065587	C	G	Fam135a	c.157+2312G>C	intron_variant	MODIFIER	transcript	64	0	0	116	61	0.526	SNP	5.95479
S3600-THY_vs_S3600-LIVER-resent	chr1	24530533	24530533	C	G	Col19a1	c.658-525G>C	intron_variant	MODIFIER	transcript	68	0	0	96	38	0.404	SNP	5.93564
S3600-THY_vs_S3600-LIVER-resent	chr1	24736740	24736740	C	A	Lmbrd1	c.906+4841C>A	intron_variant	MODIFIER	transcript	57	0	0	100	38	0.384	SNP	5.85364
S3600-THY_vs_S3600-LIVER-resent	chr1	24828848	24828848	A	ATTTC	Lmbrd1-Adgrb3	n.24828848_24828849insTTTC	intergenic_region	MODIFIER	intergenic_region	17	0	0	34	15	0.455	INSERTION.NumRepetitions_10orMore.EventLength_4	3.11121
S3600-THY_vs_S3600-LIVER-resent	chr1	25268355	25268355	C	G	Adgrb3	c.2481-39808G>C	intron_variant	MODIFIER	transcript	55	0	0	109	51	0.468	SNP	5.73756
S3600-THY_vs_S3600-LIVER-resent	chr1	25382627	25382627	C	G	Adgrb3	c.2480+13809G>C	intron_variant	MODIFIER	transcript	89	1	0.011	104	54	0.524	SNP	6.0138
S3600-THY_vs_S3600-LIVER-resent	chr1	25611227	25611227	G	A	Adgrb3	c.758-51362C>T	intron_variant	MODIFIER	transcript	35	0	0	63	37	0.587	SNP	6.16237
S3600-THY_vs_S3600-LIVER-resent	chr1	25828599	25828599	G	C	Adgrb3	c.-16+863C>G	intron_variant	MODIFIER	transcript	61	0	0	96	45	0.479	SNP	6.32465
S3600-THY_vs_S3600-LIVER-resent	chr1	26180856	26180856	C	G	Adgrb3-4931408C20Rik	n.26180856C>G	intergenic_region	MODIFIER	intergenic_region	75	1	0.014	91	38	0.418	SNP	6.03557
S3600-THY_vs_S3600-LIVER-resent	chr1	26300257	26300258	AT	A	Adgrb3-4931408C20Rik	n.26300258delT	intergenic_region	MODIFIER	intergenic_region	53	0	0	92	25	0.264	DELETION.NumRepetitions_9.EventLength_1.RepeatExpansion_T	5.37261
S3600-THY_vs_S3600-LIVER-resent	chr1	26774939	26774939	C	G	4931408C20Rik-Gm597	n.26774939C>G	intergenic_region	MODIFIER	intergenic_region	69	0	0	108	45	0.419	SNP	6.07995
S3600-THY_vs_S3600-LIVER-resent	chr1	26812289	26812289	C	CT	4931408C20Rik-Gm597	n.26812289_26812290insT	intergenic_region	MODIFIER	intergenic_region	49	0	0	98	49	0.495	INSERTION.NumRepetitions_9.EventLength_1.RepeatExpansion_T	6.11262
S3600-THY_vs_S3600-LIVER-resent	chr1	27264129	27264130	AC	A	4931408C20Rik-Gm597	n.27264130delC	intergenic_region	MODIFIER	intergenic_region	74	1	0.014	96	41	0.426	DELETION.NumRepetitions_1.EventLength_1.RepeatExpansion_C	5.80161
S3600-THY_vs_S3600-LIVER-resent	chr1	27410280	27410280	A	G	4931408C20Rik-Gm597	n.27410280A>G	intergenic_region	MODIFIER	intergenic_region	54	1	0.019	105	54	0.514	SNP	5.95554
S3600-THY_vs_S3600-LIVER-resent	chr1	27915007	27915007	T	G	4931408C20Rik-Gm597	n.27915007T>G	intergenic_region	MODIFIER	intergenic_region	65	0	0	99	46	0.459	SNP	5.97195
S3600-THY_vs_S3600-LIVER-resent	chr1	28114511	28114511	C	G	4931408C20Rik-Gm597	n.28114511C>G	intergenic_region	MODIFIER	intergenic_region	60	0	0	90	40	0.449	SNP	6.41505
S3600-THY_vs_S3600-LIVER-resent	chr1	28328340	28328340	C	G	4931408C20Rik-Gm597	n.28328340C>G	intergenic_region	MODIFIER	intergenic_region	64	0	0	101	51	0.49	SNP	5.74021
S3600-THY_vs_S3600-LIVER-resent	chr1	29105769	29105769	C	G	Gm597-Mir6342	n.29105769C>G	intergenic_region	MODIFIER	intergenic_region	73	0	0	118	47	0.398	SNP	6.22654
S3600-THY_vs_S3600-LIVER-resent	chr1	29222215	29222215	T	TTTTC	Gm597-Mir6342	n.29222215_29222216insTTTC	intergenic_region	MODIFIER	intergenic_region	20	0	0	31	13	0.433	INSERTION.NumRepetitions_10orMore.EventLength_4	3.21794
S3600-THY_vs_S3600-LIVER-resent	chr1	29675205	29675205	C	G	Mir6342-Phf3	n.29675205C>G	intergenic_region	MODIFIER	intergenic_region	66	0	0	78	38	0.487	SNP	6.48699
S3600-THY_vs_S3600-LIVER-resent	chr1	29687696	29687696	C	A	Mir6342-Phf3	n.29687696C>A	intergenic_region	MODIFIER	intergenic_region	76	1	0.013	112	49	0.432	SNP	5.8574
S3600-THY_vs_S3600-LIVER-resent	chr1	29692881	29692882	AC	A	Mir6342-Phf3	n.29692882delC	intergenic_region	MODIFIER	intergenic_region	39	0	0	61	33	0.542	DELETION.NumRepetitions_9.EventLength_1.RepeatExpansion_C	6.1089
S3600-THY_vs_S3600-LIVER-resent	chr1	30223745	30223745	G	A	Mir6342-Phf3	n.30223745G>A	intergenic_region	MODIFIER	intergenic_region	44	1	0.023	101	41	0.404	SNP	6.22919
S3600-THY_vs_S3600-LIVER-resent	chr1	30349385	30349385	T	G	Mir6342-Phf3	n.30349385T>G	intergenic_region	MODIFIER	intergenic_region	15	0	0	7	7	1	SNP	5.23184
S3600-THY_vs_S3600-LIVER-resent	chr1	30400957	30400957	C	G	Mir6342-Phf3	n.30400957C>G	intergenic_region	MODIFIER	intergenic_region	57	0	0	114	41	0.369	SNP	6.00391
S3600-THY_vs_S3600-LIVER-resent	chr1	30524097	30524097	G	C	Mir6342-Phf3	n.30524097G>C	intergenic_region	MODIFIER	intergenic_region	73	0	0	120	57	0.474	SNP	5.84347
S3600-THY_vs_S3600-LIVER-resent	chr1	30549495	30549496	AC	A	Mir6342-Phf3	n.30549496delC	intergenic_region	MODIFIER	intergenic_region	30	0	0	38	22	0.579	DELETION.NumRepetitions_10orMore.EventLength_1.RepeatExpansion_C	6.96055
S3600-THY_vs_S3600-LIVER-resent	chr1	30752913	30752913	C	T	Mir6342-Phf3	n.30752913C>T	intergenic_region	MODIFIER	intergenic_region	72	0	0	115	59	0.509	SNP	5.76015
S3600-THY_vs_S3600-LIVER-resent	chr1	30784527	30784527	C	G	Mir6342-Phf3	n.30784527C>G	intergenic_region	MODIFIER	intergenic_region	71	0	0	111	48	0.435	SNP	5.74724
S3600-THY_vs_S3600-LIVER-resent	chr1	30882107	30882107	C	G	Phf3-Ptp4a1	n.30882107C>G	intergenic_region	MODIFIER	intergenic_region	62	0	0	118	51	0.431	SNP	5.86483
S3600-THY_vs_S3600-LIVER-resent	chr1	30919435	30919435	C	G	Phf3-Ptp4a1	n.30919435C>G	intergenic_region	MODIFIER	intergenic_region	60	0	0	94	35	0.385	SNP	5.97089
S3600-THY_vs_S3600-LIVER-resent	chr1	30966345	30966345	C	G	Ptp4a1-Gm29669	n.30966345C>G	intergenic_region	MODIFIER	intergenic_region	67	0	0	93	45	0.478	SNP	6.10943
S3600-THY_vs_S3600-LIVER-resent	chr1	31029939	31029939	C	G	Gm29669	n.272-8976G>C	intron_variant	MODIFIER	transcript	64	0	0	102	53	0.52	SNP	5.9738
S3600-THY_vs_S3600-LIVER-resent	chr1	31383954	31383954	C	G	Gm4850-Khdrbs2	n.31383954C>G	intergenic_region	MODIFIER	intergenic_region	59	1	0.017	90	45	0.5	SNP	5.88095
S3600-THY_vs_S3600-LIVER-resent	chr1	31661136	31661136	C	G	Gm4850-Khdrbs2	n.31661136C>G	intergenic_region	MODIFIER	intergenic_region	61	1	0.017	107	44	0.411	SNP	6.37125
S3600-THY_vs_S3600-LIVER-resent	chr1	32004824	32004824	A	AATAG	Gm4850-Khdrbs2	n.32004824_32004825insATAG	intergenic_region	MODIFIER	intergenic_region	51	1	0.02	62	28	0.46	INSERTION.NumRepetitions_10orMore.EventLength_4	6.16312
S3600-THY_vs_S3600-LIVER-resent	chr1	32039607	32039607	C	G	Gm4850-Khdrbs2	n.32039607C>G	intergenic_region	MODIFIER	intergenic_region	59	1	0.017	92	43	0.473	SNP	6.04643
S3600-THY_vs_S3600-LIVER-resent	chr1	32131890	32131890	C	G	Gm4850-Khdrbs2	n.32131890C>G	intergenic_region	MODIFIER	intergenic_region	56	0	0	93	36	0.387	SNP	5.92765
S3600-THY_vs_S3600-LIVER-resent	chr1	32233253	32233253	C	G	Khdrbs2	c.92-10647C>G	intron_variant	MODIFIER	transcript	71	0	0	120	60	0.5	SNP	6.09568
S3600-THY_vs_S3600-LIVER-resent	chr1	32483607	32483607	C	G	Khdrbs2	c.810+10842C>G	intron_variant	MODIFIER	transcript	55	1	0.018	95	44	0.463	SNP	5.99462
S3600-THY_vs_S3600-LIVER-resent	chr1	32683871	32683871	C	G	Khdrbs2-Prim2	n.32683871C>G	intergenic_region	MODIFIER	intergenic_region	61	0	0	100	52	0.515	SNP	5.7962
S3600-THY_vs_S3600-LIVER-resent	chr1	32965573	32965573	C	G	Khdrbs2-Prim2	n.32965573C>G	intergenic_region	MODIFIER	intergenic_region	80	0	0	105	57	0.538	SNP	5.98436
S3600-THY_vs_S3600-LIVER-resent	chr1	33093022	33093022	C	G	Khdrbs2-Prim2	n.33093022C>G	intergenic_region	MODIFIER	intergenic_region	78	0	0	92	36	0.389	SNP	5.9232
S3600-THY_vs_S3600-LIVER-resent	chr1	33162700	33162700	C	G	Khdrbs2-Prim2	n.33162700C>G	intergenic_region	MODIFIER	intergenic_region	53	0	0	96	45	0.469	SNP	6.25667
S3600-THY_vs_S3600-LIVER-resent	chr1	33181235	33181235	C	G	Khdrbs2-Prim2	n.33181235C>G	intergenic_region	MODIFIER	intergenic_region	65	0	0	101	39	0.398	SNP	5.86216
S3600-THY_vs_S3600-LIVER-resent	chr1	33187818	33187818	C	G	Khdrbs2-Prim2	n.33187818C>G	intergenic_region	MODIFIER	intergenic_region	62	0	0	97	42	0.433	SNP	6.06424
S3600-THY_vs_S3600-LIVER-resent	chr1	33221451	33221451	C	T	Khdrbs2-Prim2	n.33221451C>T	intergenic_region	MODIFIER	intergenic_region	63	0	0	116	62	0.539	SNP	5.93356
S3600-THY_vs_S3600-LIVER-resent	chr1	33230265	33230265	C	G	Khdrbs2-Prim2	n.33230265C>G	intergenic_region	MODIFIER	intergenic_region	54	0	0	106	43	0.41	SNP	5.98171
S3600-THY_vs_S3600-LIVER-resent	chr1	33237429	33237429	C	G	Khdrbs2-Prim2	n.33237429C>G	intergenic_region	MODIFIER	intergenic_region	64	0	0	108	51	0.467	SNP	6.15818
S3600-THY_vs_S3600-LIVER-resent	chr1	33244388	33244388	C	G	Khdrbs2-Prim2	n.33244388C>G	intergenic_region	MODIFIER	intergenic_region	48	0	0	94	45	0.467	SNP	5.98894
S3600-THY_vs_S3600-LIVER-resent	chr1	33276394	33276394	C	G	Khdrbs2-Prim2	n.33276394C>G	intergenic_region	MODIFIER	intergenic_region	59	1	0.017	108	55	0.509	SNP	5.9763
S3600-THY_vs_S3600-LIVER-resent	chr1	33338786	33338786	C	G	Khdrbs2-Prim2	n.33338786C>G	intergenic_region	MODIFIER	intergenic_region	52	0	0	101	52	0.515	SNP	6.24232
S3600-THY_vs_S3600-LIVER-resent	chr1	33380854	33380854	C	G	Khdrbs2-Prim2	n.33380854C>G	intergenic_region	MODIFIER	intergenic_region	57	1	0.018	110	49	0.445	SNP	5.71373
S3600-THY_vs_S3600-LIVER-resent	chr1	33601393	33601393	C	G	Prim2	c.693+27002G>C	intron_variant	MODIFIER	transcript	56	0	0	81	42	0.519	SNP	6.36223
S3600-THY_vs_S3600-LIVER-resent	chr1	33642792	33642792	C	G	Prim2	c.460-12359G>C	intron_variant	MODIFIER	transcript	86	0	0	115	50	0.446	SNP	5.96054
S3600-THY_vs_S3600-LIVER-resent	chr1	33672455	33672455	C	G	Prim2	c.-3444G>C	upstream_gene_variant	MODIFIER	transcript	90	0	0	113	63	0.559	SNP	5.82307
S3600-THY_vs_S3600-LIVER-resent	chr1	33674857	33674857	G	C	1700001G17Rik	n.*4145G>C	downstream_gene_variant	MODIFIER	transcript	85	0	0	103	47	0.451	SNP	5.93256
S3600-THY_vs_S3600-LIVER-resent	chr1	33905984	33905984	C	G	Dst	c.-2288C>G	upstream_gene_variant	MODIFIER	transcript	71	0	0	94	46	0.489	SNP	5.92314
S3600-THY_vs_S3600-LIVER-resent	chr1	33911479	33911479	C	G	Bend6	c.-27919G>C	upstream_gene_variant	MODIFIER	transcript	41	0	0	78	39	0.5	SNP	6.01431
S3600-THY_vs_S3600-LIVER-resent	chr1	33940428	33940428	C	G	Dst	c.217-28275C>G	intron_variant	MODIFIER	transcript	68	0	0	118	65	0.551	SNP	5.87187
S3600-THY_vs_S3600-LIVER-resent	chr1	33972932	33972932	C	G	Dst	c.417+4029C>G	intron_variant	MODIFIER	transcript	68	1	0.015	122	59	0.479	SNP	5.8367
S3600-THY_vs_S3600-LIVER-resent	chr1	34011626	34011626	G	C	Dst	c.625+5228G>C	intron_variant	MODIFIER	transcript	63	0	0	108	52	0.477	SNP	6.1288
S3600-THY_vs_S3600-LIVER-resent	chr1	34223392	34223392	C	G	Dst	c.14135-412C>G	intron_variant	MODIFIER	transcript	78	0	0	120	58	0.479	SNP	5.95178
S3600-THY_vs_S3600-LIVER-resent	chr1	34254941	34254941	C	G	Dst	c.17824-1291C>G	intron_variant	MODIFIER	transcript	73	0	0	125	60	0.484	SNP	6.04928
S3600-THY_vs_S3600-LIVER-resent	chr1	34270508	34270508	C	G	Dst	c.19591-320C>G	intron_variant	MODIFIER	transcript	73	1	0.014	122	70	0.57	SNP	5.88186
S3600-THY_vs_S3600-LIVER-resent	chr1	34275408	34275408	C	G	Dst	c.20244+48C>G	intron_variant	MODIFIER	transcript	78	1	0.013	109	51	0.467	SNP	6.04993
S3600-THY_vs_S3600-LIVER-resent	chr1	34279024	34279024	C	G	Dst	c.20571+885C>G	intron_variant	MODIFIER	transcript	77	0	0	126	60	0.463	SNP	5.83995
S3600-THY_vs_S3600-LIVER-resent	chr1	34279528	34279528	C	G	Dst	c.20571+1389C>G	intron_variant	MODIFIER	transcript	64	0	0	117	57	0.478	SNP	5.78279
S3600-THY_vs_S3600-LIVER-resent	chr1	34296346	34296346	C	G	Dst	c.22246-396C>G	intron_variant	MODIFIER	transcript	73	1	0.014	96	49	0.51	SNP	5.89404
S3600-THY_vs_S3600-LIVER-resent	chr1	34410390	34410390	C	G	Dst-Mir5103	n.34410390C>G	intergenic_region	MODIFIER	intergenic_region	57	0	0	91	45	0.495	SNP	6.01255
S3600-THY_vs_S3600-LIVER-resent	chr1	34508302	34508302	C	G	Prss39-Cfc1	n.34508302C>G	intergenic_region	MODIFIER	intergenic_region	69	0	0	103	50	0.485	SNP	6.04759
S3600-THY_vs_S3600-LIVER-resent	chr1	34615020	34615020	C	G	Amer3-AA619741	n.34615020C>G	intergenic_region	MODIFIER	intergenic_region	75	0	0	102	52	0.51	SNP	6.08637
S3600-THY_vs_S3600-LIVER-resent	chr1	34669948	34669948	C	G	AA619741-Arhgef4	n.34669948C>G	intergenic_region	MODIFIER	intergenic_region	84	1	0.012	86	41	0.477	SNP	6.08478
S3600-THY_vs_S3600-LIVER-resent	chr1	34790291	34790291	C	G	AA619741-Arhgef4	n.34790291C>G	intergenic_region	MODIFIER	intergenic_region	77	1	0.013	98	53	0.541	SNP	5.96895
S3600-THY_vs_S3600-LIVER-resent	chr1	34876461	34876461	C	G	Plekhb2	c.530-450C>G	intron_variant	MODIFIER	transcript	66	0	0	129	68	0.528	SNP	5.91895
S3600-THY_vs_S3600-LIVER-resent	chr1	34884819	34884819	C	G	Plekhb2-Hs6st1	n.34884819C>G	intergenic_region	MODIFIER	intergenic_region	62	0	0	105	56	0.538	SNP	6.31001
S3600-THY_vs_S3600-LIVER-resent	chr1	34893924	34893924	C	G	Plekhb2-Hs6st1	n.34893924C>G	intergenic_region	MODIFIER	intergenic_region	80	0	0	102	54	0.529	SNP	5.87885
S3600-THY_vs_S3600-LIVER-resent	chr1	34921731	34921731	C	G	Plekhb2-Hs6st1	n.34921731C>G	intergenic_region	MODIFIER	intergenic_region	79	0	0	133	57	0.429	SNP	6.04401
S3600-THY_vs_S3600-LIVER-resent	chr1	34926111	34926111	C	CCTTT	Plekhb2-Hs6st1	n.34926111_34926112insCTTT	intergenic_region	MODIFIER	intergenic_region	27	0	0.036	46	18	0.391	INSERTION.NumRepetitions_10orMore.EventLength_4	4.24939
S3600-THY_vs_S3600-LIVER-resent	chr1	34987177	34987177	C	G	Plekhb2-Hs6st1	n.34987177C>G	intergenic_region	MODIFIER	intergenic_region	65	0	0	102	57	0.554	SNP	5.75021
S3600-THY_vs_S3600-LIVER-resent	chr1	34999783	34999783	C	CTTCT	Plekhb2-Hs6st1	n.34999783_34999784insTTCT	intergenic_region	MODIFIER	intergenic_region	22	0	0	33	12	0.382	INSERTION.NumRepetitions_10orMore.EventLength_4	2.78476
S3600-THY_vs_S3600-LIVER-resent	chr1	35056310	35056310	C	G	Plekhb2-Hs6st1	n.35056310C>G	intergenic_region	MODIFIER	intergenic_region	38	0	0	76	40	0.526	SNP	6.1189
S3600-THY_vs_S3600-LIVER-resent	chr1	35066253	35066253	C	T	Plekhb2-Hs6st1	n.35066253C>T	intergenic_region	MODIFIER	intergenic_region	68	0	0	106	48	0.453	SNP	5.82532
S3600-THY_vs_S3600-LIVER-resent	chr1	35153187	35153187	C	G	Plekhb2-Hs6st1	n.35153187C>G	intergenic_region	MODIFIER	intergenic_region	25	0	0	48	28	0.583	SNP	6.51151
S3600-THY_vs_S3600-LIVER-resent	chr1	35174192	35174192	C	G	Plekhb2-Hs6st1	n.35174192C>G	intergenic_region	MODIFIER	intergenic_region	64	0	0	106	48	0.442	SNP	6.41007
S3600-THY_vs_S3600-LIVER-resent	chr1	35176529	35176530	TA	T	Plekhb2-Hs6st1	n.35176530delA	intergenic_region	MODIFIER	intergenic_region	46	0	0	77	31	0.403	DELETION.NumRepetitions_9.EventLength_1.RepeatExpansion_A	5.9908
S3600-THY_vs_S3600-LIVER-resent	chr1	35194116	35194116	T	G	Plekhb2-Hs6st1	n.35194116T>G	intergenic_region	MODIFIER	intergenic_region	67	1	0.015	97	48	0.5	SNP	6.18131
S3600-THY_vs_S3600-LIVER-resent	chr1	35232097	35232097	C	G	Plekhb2-Hs6st1	n.35232097C>G	intergenic_region	MODIFIER	intergenic_region	60	0	0	114	49	0.432	SNP	5.95847
S3600-THY_vs_S3600-LIVER-resent	chr1	35238924	35238924	C	G	Plekhb2-Hs6st1	n.35238924C>G	intergenic_region	MODIFIER	intergenic_region	65	0	0	108	51	0.477	SNP	6.12207
S3600-THY_vs_S3600-LIVER-resent	chr1	35248278	35248278	C	G	Plekhb2-Hs6st1	n.35248278C>G	intergenic_region	MODIFIER	intergenic_region	70	1	0.014	108	54	0.5	SNP	6.06954
S3600-THY_vs_S3600-LIVER-resent	chr1	35269123	35269123	G	C	Plekhb2-Hs6st1	n.35269123G>C	intergenic_region	MODIFIER	intergenic_region	65	0	0	110	26	0.239	SNP	5.56202
S3600-THY_vs_S3600-LIVER-resent	chr1	35302219	35302219	C	G	Plekhb2-Hs6st1	n.35302219C>G	intergenic_region	MODIFIER	intergenic_region	63	0	0	107	42	0.393	SNP	6.01535
S3600-THY_vs_S3600-LIVER-resent	chr1	35337395	35337395	C	G	Plekhb2-Hs6st1	n.35337395C>G	intergenic_region	MODIFIER	intergenic_region	49	0	0	72	33	0.458	SNP	6.13252
S3600-THY_vs_S3600-LIVER-resent	chr1	35343406	35343406	C	G	Plekhb2-Hs6st1	n.35343406C>G	intergenic_region	MODIFIER	intergenic_region	70	0	0	117	64	0.547	SNP	5.91159
S3600-THY_vs_S3600-LIVER-resent	chr1	35347610	35347610	C	G	Plekhb2-Hs6st1	n.35347610C>G	intergenic_region	MODIFIER	intergenic_region	55	0	0	129	67	0.52	SNP	5.78591
S3600-THY_vs_S3600-LIVER-resent	chr1	35353171	35353171	C	G	Plekhb2-Hs6st1	n.35353171C>G	intergenic_region	MODIFIER	intergenic_region	63	0	0	114	54	0.469	SNP	5.98967
S3600-THY_vs_S3600-LIVER-resent	chr1	35541325	35541325	C	G	Plekhb2-Hs6st1	n.35541325C>G	intergenic_region	MODIFIER	intergenic_region	69	0	0	113	57	0.505	SNP	5.97687
S3600-THY_vs_S3600-LIVER-resent	chr1	35614270	35614270	G	C	Plekhb2-Hs6st1	n.35614270G>C	intergenic_region	MODIFIER	intergenic_region	56	1	0.018	108	42	0.4	SNP	5.84273
S3600-THY_vs_S3600-LIVER-resent	chr1	35628718	35628718	C	G	Plekhb2-Hs6st1	n.35628718C>G	intergenic_region	MODIFIER	intergenic_region	59	0	0	111	58	0.518	SNP	5.94778
S3600-THY_vs_S3600-LIVER-resent	chr1	36268206	36268206	G	C	Neurl3	c.571+450C>G	intron_variant	MODIFIER	transcript	77	0	0	105	26	0.248	SNP	6.4458
S3600-THY_vs_S3600-LIVER-resent	chr1	36441619	36441619	C	T	Lman2l	c.303+1872G>A	intron_variant	MODIFIER	transcript	89	0	0	86	24	0.279	SNP	6.15381
S3600-THY_vs_S3600-LIVER-resent	chr1	36494752	36494752	G	C	Cnnm4	c.1394-3238G>C	intron_variant	MODIFIER	transcript	101	0	0	129	60	0.465	SNP	6.10745
S3600-THY_vs_S3600-LIVER-resent	chr1	36584151	36584151	G	C	Fam178b	c.48+1765C>G	intron_variant	MODIFIER	transcript	66	0	0	91	42	0.456	SNP	6.46017
S3600-THY_vs_S3600-LIVER-resent	chr1	36600097	36600097	G	C	Fam178b	c.1094+26C>G	intron_variant	MODIFIER	transcript	83	0	0	121	60	0.492	SNP	5.73933
S3600-THY_vs_S3600-LIVER-resent	chr1	36620903	36620903	G	C	Fam178b	c.619+11517C>G	intron_variant	MODIFIER	transcript	55	0	0	86	28	0.329	SNP	6.42686
S3600-THY_vs_S3600-LIVER-resent	chr1	36734293	36734293	G	C	4933424G06Rik	n.496+344G>C	intron_variant	MODIFIER	transcript	56	1	0.018	134	60	0.447	SNP	6.03193
S3600-THY_vs_S3600-LIVER-resent	chr1	36743031	36743031	G	C	4933424G06Rik	n.595+655G>C	intron_variant	MODIFIER	transcript	83	1	0.012	108	49	0.458	SNP	6.0995
S3600-THY_vs_S3600-LIVER-resent	chr1	36747159	36747159	G	C	4933424G06Rik	n.956+588G>C	intron_variant	MODIFIER	transcript	67	0	0	120	59	0.492	SNP	6.33275
S3600-THY_vs_S3600-LIVER-resent	chr1	36755092	36755092	G	C	4933424G06Rik	n.957-2698G>C	intron_variant	MODIFIER	transcript	98	0	0	120	58	0.479	SNP	5.9235
S3600-THY_vs_S3600-LIVER-resent	chr1	36768736	36768736	G	C	Zap70	c.64-2066G>C	intron_variant	MODIFIER	transcript	57	0	0	105	56	0.529	SNP	5.74529
S3600-THY_vs_S3600-LIVER-resent	chr1	36851543	36851543	G	C	Tmem131	c.477+3301C>G	intron_variant	MODIFIER	transcript	84	1	0.012	126	32	0.258	SNP	5.93057
S3600-THY_vs_S3600-LIVER-resent	chr1	36856727	36856727	G	C	Tmem131	c.354-1760C>G	intron_variant	MODIFIER	transcript	79	0	0	126	65	0.512	SNP	5.8789
S3600-THY_vs_S3600-LIVER-resent	chr1	37317088	37317088	G	C	Inpp4a	c.-167+16970G>C	intron_variant	MODIFIER	transcript	85	0	0	117	26	0.211	SNP	6.37493
S3600-THY_vs_S3600-LIVER-resent	chr1	37544380	37544380	G	C	Mgat4a	c.-8248C>G	upstream_gene_variant	MODIFIER	transcript	60	0	0	103	37	0.363	SNP	6.33826
S3600-THY_vs_S3600-LIVER-resent	chr1	37606096	37606096	G	C	Mgat4a-2010300C02Rik	n.37606096G>C	intergenic_region	MODIFIER	intergenic_region	65	0	0	114	28	0.239	SNP	5.77986
S3600-THY_vs_S3600-LIVER-resent	chr1	37681748	37681748	G	A	2010300C02Rik	c.-10-37108C>T	intron_variant	MODIFIER	transcript	81	1	0.013	122	59	0.479	SNP	5.77008
S3600-THY_vs_S3600-LIVER-resent	chr1	38699169	38699169	G	C	Aff3-Lonrf2	n.38699169G>C	intergenic_region	MODIFIER	intergenic_region	75	0	0	99	43	0.421	SNP	6.07953
S3600-THY_vs_S3600-LIVER-resent	chr1	38766123	38766123	C	CCTTT	Aff3-Lonrf2	n.38766123_38766124insCTTT	intergenic_region	MODIFIER	intergenic_region	51	0	0	46	15	0.326	INSERTION.NumRepetitions_10orMore.EventLength_4	5.48057
S3600-THY_vs_S3600-LIVER-resent	chr1	38889706	38889706	C	A	Chst10	c.23-5225G>T	intron_variant	MODIFIER	transcript	73	1	0.014	94	55	0.576	SNP	5.8985
S3600-THY_vs_S3600-LIVER-resent	chr1	39002990	39002990	G	C	Pdcl3-Mir6349	n.39002990G>C	intergenic_region	MODIFIER	intergenic_region	65	0	0	105	46	0.441	SNP	6.11082
S3600-THY_vs_S3600-LIVER-resent	chr1	39116129	39116129	G	C	Pdcl3-Mir6349	n.39116129G>C	intergenic_region	MODIFIER	intergenic_region	64	0	0	115	57	0.496	SNP	6.15029
S3600-THY_vs_S3600-LIVER-resent	chr1	39165291	39165291	C	G	Pdcl3-Mir6349	n.39165291C>G	intergenic_region	MODIFIER	intergenic_region	64	0	0	109	55	0.505	SNP	5.86476
S3600-THY_vs_S3600-LIVER-resent	chr1	39241641	39241641	C	G	Npas2	c.-25-21678C>G	intron_variant	MODIFIER	transcript	78	0	0	130	65	0.5	SNP	5.93756
S3600-THY_vs_S3600-LIVER-resent	chr1	39244601	39244601	C	G	Npas2	c.-25-18718C>G	intron_variant	MODIFIER	transcript	75	1	0.013	115	45	0.386	SNP	6.24687
S3600-THY_vs_S3600-LIVER-resent	chr1	39616416	39616416	T	A	Creg2	c.*6680A>T	downstream_gene_variant	MODIFIER	transcript	70	1	0.014	110	58	0.528	SNP	5.80155
S3600-THY_vs_S3600-LIVER-resent	chr1	39688226	39688226	C	G	Rfx8	c.591+347G>C	intron_variant	MODIFIER	transcript	86	0	0	112	55	0.486	SNP	5.94309
S3600-THY_vs_S3600-LIVER-resent	chr1	39705731	39705731	C	G	Rfx8	c.338+4427G>C	intron_variant	MODIFIER	transcript	80	1	0.013	143	71	0.489	SNP	5.89077
S3600-THY_vs_S3600-LIVER-resent	chr1	39711278	39711278	C	G	Rfx8	c.251+100G>C	intron_variant	MODIFIER	transcript	43	0	0	84	40	0.476	SNP	5.825
S3600-THY_vs_S3600-LIVER-resent	chr1	39744063	39744063	G	C	Rfx8-Gm3646	n.39744063G>C	intergenic_region	MODIFIER	intergenic_region	96	0	0	113	55	0.486	SNP	5.85442
S3600-THY_vs_S3600-LIVER-resent	chr1	39879778	39879778	G	C	1700066B17Rik-Map4k4	n.39879778G>C	intergenic_region	MODIFIER	intergenic_region	70	0	0	98	20	0.206	SNP	4.94708
S3600-THY_vs_S3600-LIVER-resent	chr1	40246015	40246015	G	C	Il1r1	c.3+20709G>C	intron_variant	MODIFIER	transcript	76	0	0	108	50	0.472	SNP	6.26428
S3600-THY_vs_S3600-LIVER-resent	chr1	40320633	40320633	C	G	Il1rl2	c.-5862C>G	upstream_gene_variant	MODIFIER	transcript	107	0	0	126	60	0.476	SNP	6.01138
S3600-THY_vs_S3600-LIVER-resent	chr1	40410821	40410821	C	T	Il1rl2-Il1rl1	n.40410821C>T	intergenic_region	MODIFIER	intergenic_region	94	1	0.011	116	52	0.448	SNP	5.92485
S3600-THY_vs_S3600-LIVER-resent	chr1	40528754	40528754	C	G	Il18rap	c.577-2722C>G	intron_variant	MODIFIER	transcript	76	0	0	107	53	0.486	SNP	5.97643
S3600-THY_vs_S3600-LIVER-resent	chr1	40757260	40757260	C	G	Slc9a2	c.1589+931C>G	intron_variant	MODIFIER	transcript	82	1	0.012	103	53	0.52	SNP	5.82887
S3600-THY_vs_S3600-LIVER-resent	chr1	40786224	40786224	C	G	Mfsd9	c.224-14G>C	intron_variant	MODIFIER	transcript	94	0	0	103	49	0.476	SNP	5.89509
S3600-THY_vs_S3600-LIVER-resent	chr1	40791009	40791009	C	G	Mfsd9	c.-390G>C	upstream_gene_variant	MODIFIER	transcript	69	0	0	112	49	0.427	SNP	5.73364
S3600-THY_vs_S3600-LIVER-resent	chr1	41033951	41033951	C	G	Tmem182-4930448I06Rik	n.41033951C>G	intergenic_region	MODIFIER	intergenic_region	62	0	0	130	49	0.383	SNP	5.68768
S3600-THY_vs_S3600-LIVER-resent	chr1	41049877	41049877	C	CGAG	Tmem182-4930448I06Rik	n.41049877_41049878insGAG	intergenic_region	MODIFIER	intergenic_region	20	0	0	36	24	0.684	INSERTION.NOVEL_3	6.42698
S3600-THY_vs_S3600-LIVER-resent	chr1	41410395	41410395	C	G	4930448I06Rik-Pantr1	n.41410395C>G	intergenic_region	MODIFIER	intergenic_region	69	0	0	109	54	0.495	SNP	6.1153
S3600-THY_vs_S3600-LIVER-resent	chr1	41511014	41511014	G	C	4930448I06Rik-Pantr1	n.41511014G>C	intergenic_region	MODIFIER	intergenic_region	69	0	0	119	56	0.466	SNP	6.04741
S3600-THY_vs_S3600-LIVER-resent	chr1	41674938	41674938	C	G	4930448I06Rik-Pantr1	n.41674938C>G	intergenic_region	MODIFIER	intergenic_region	54	0	0	103	41	0.402	SNP	6.10508
S3600-THY_vs_S3600-LIVER-resent	chr1	42455787	42455787	C	G	4930448I06Rik-Pantr1	n.42455787C>G	intergenic_region	MODIFIER	intergenic_region	49	0	0	99	45	0.454	SNP	5.88845
S3600-THY_vs_S3600-LIVER-resent	chr1	42487093	42487093	C	A	4930448I06Rik-Pantr1	n.42487093C>A	intergenic_region	MODIFIER	intergenic_region	69	0	0	105	50	0.476	SNP	5.98131
S3600-THY_vs_S3600-LIVER-resent	chr1	42511385	42511385	C	G	4930448I06Rik-Pantr1	n.42511385C>G	intergenic_region	MODIFIER	intergenic_region	66	0	0	111	63	0.568	SNP	6.11576
S3600-THY_vs_S3600-LIVER-resent	chr1	42564741	42564741	C	G	4930448I06Rik-Pantr1	n.42564741C>G	intergenic_region	MODIFIER	intergenic_region	73	0	0	124	59	0.467	SNP	6.07603
S3600-THY_vs_S3600-LIVER-resent	chr1	42624197	42624197	C	G	4930448I06Rik-Pantr1	n.42624197C>G	intergenic_region	MODIFIER	intergenic_region	51	0	0	122	57	0.467	SNP	6.00139
S3600-THY_vs_S3600-LIVER-resent	chr1	42650172	42650172	C	G	Pantr1	n.290-1716G>C	intron_variant	MODIFIER	transcript	54	0	0	97	38	0.385	SNP	5.87073
S3600-THY_vs_S3600-LIVER-resent	chr1	42656569	42656569	C	G	Pantr1	n.289+6987G>C	intron_variant	MODIFIER	transcript	51	1	0.02	99	44	0.439	SNP	5.88555
S3600-THY_vs_S3600-LIVER-resent	chr1	42670917	42670917	T	TGAAA	Pantr1	n.80-3915_80-3914insTTTC	intron_variant	MODIFIER	transcript	14	0	0	18	18	1	INSERTION.NumRepetitions_10orMore.EventLength_4	6.2703
S3600-THY_vs_S3600-LIVER-resent	chr1	42738562	42738562	C	G	Pantr2-Dalir	n.42738562C>G	intergenic_region	MODIFIER	intergenic_region	68	0	0	109	50	0.472	SNP	6.08641
S3600-THY_vs_S3600-LIVER-resent	chr1	42774414	42774414	C	G	Dalir-Mrps9	n.42774414C>G	intergenic_region	MODIFIER	intergenic_region	66	0	0	127	57	0.447	SNP	6.12845
S3600-THY_vs_S3600-LIVER-resent	chr1	42777893	42777893	C	G	Dalir-Mrps9	n.42777893C>G	intergenic_region	MODIFIER	intergenic_region	88	1	0.011	126	62	0.492	SNP	5.80623
S3600-THY_vs_S3600-LIVER-resent	chr1	42795923	42795923	C	G	Dalir-Mrps9	n.42795923C>G	intergenic_region	MODIFIER	intergenic_region	64	0	0	108	56	0.523	SNP	6.20613
S3600-THY_vs_S3600-LIVER-resent	chr1	42813450	42813450	C	G	Dalir-Mrps9	n.42813450C>G	intergenic_region	MODIFIER	intergenic_region	72	0	0	121	58	0.479	SNP	5.81885
S3600-THY_vs_S3600-LIVER-resent	chr1	42814632	42814632	C	G	Dalir-Mrps9	n.42814632C>G	intergenic_region	MODIFIER	intergenic_region	83	0	0	126	70	0.556	SNP	5.85404
S3600-THY_vs_S3600-LIVER-resent	chr1	42912785	42912785	C	T	Mrps9-Gpr45	n.42912785C>T	intergenic_region	MODIFIER	intergenic_region	74	1	0.014	131	64	0.484	SNP	6.10437
S3600-THY_vs_S3600-LIVER-resent	chr1	43009749	43009749	C	T	Gpr45	c.-247-22203C>T	intron_variant	MODIFIER	transcript	75	1	0.013	141	54	0.381	SNP	5.91923
S3600-THY_vs_S3600-LIVER-resent	chr1	43128803	43128803	A	AAGAGG	Fhl2	c.502-374_502-373insCCTCT	intron_variant	MODIFIER	transcript	17	0	0	39	24	0.615	INSERTION.NumRepetitions_9.EventLength_5	4.89845
S3600-THY_vs_S3600-LIVER-resent	chr1	43143989	43143989	G	C	Fhl2	c.157-2117C>G	intron_variant	MODIFIER	transcript	88	0	0	122	64	0.525	SNP	5.77693
S3600-THY_vs_S3600-LIVER-resent	chr1	43150088	43150088	G	C	Fhl2	c.156+2988C>G	intron_variant	MODIFIER	transcript	61	1	0.016	134	65	0.489	SNP	5.88374
S3600-THY_vs_S3600-LIVER-resent	chr1	43377328	43377328	G	C	Fhl2-Nck2	n.43377328G>C	intergenic_region	MODIFIER	intergenic_region	69	0	0	104	21	0.202	SNP	4.81151
S3600-THY_vs_S3600-LIVER-resent	chr1	43390890	43390890	G	C	Fhl2-Nck2	n.43390890G>C	intergenic_region	MODIFIER	intergenic_region	64	1	0.016	124	40	0.323	SNP	6.33554
S3600-THY_vs_S3600-LIVER-resent	chr1	43429144	43429144	C	G	Fhl2-Nck2	n.43429144C>G	intergenic_region	MODIFIER	intergenic_region	84	0	0	113	29	0.259	SNP	6.128
S3600-THY_vs_S3600-LIVER-resent	chr1	43758200	43758200	C	G	Uxs1	c.909-1168G>C	intron_variant	MODIFIER	transcript	80	0	0	120	32	0.267	SNP	6.21657
S3600-THY_vs_S3600-LIVER-resent	chr1	43772538	43772538	G	C	Uxs1	c.623-736C>G	intron_variant	MODIFIER	transcript	90	0	0	112	54	0.486	SNP	5.99297
S3600-THY_vs_S3600-LIVER-resent	chr1	43792376	43792376	G	C	Uxs1	c.277-1732C>G	intron_variant	MODIFIER	transcript	80	0	0	140	36	0.259	SNP	6.19232
S3600-THY_vs_S3600-LIVER-resent	chr1	44016918	44016918	G	C	Mettl21c	c.82+268C>G	intron_variant	MODIFIER	transcript	69	0	0	97	26	0.271	SNP	6.54856
S3600-THY_vs_S3600-LIVER-resent	chr1	44347521	44347521	C	G	Mettl21e-Gulp1	n.44347521C>G	intergenic_region	MODIFIER	intergenic_region	55	0	0	107	29	0.267	SNP	5.76655
S3600-THY_vs_S3600-LIVER-resent	chr1	44390931	44390931	C	G	Mettl21e-Gulp1	n.44390931C>G	intergenic_region	MODIFIER	intergenic_region	57	1	0.018	112	53	0.463	SNP	6.26361
S3600-THY_vs_S3600-LIVER-resent	chr1	44684604	44684604	C	G	Gulp1	c.-44-4540C>G	intron_variant	MODIFIER	transcript	20	0	0	41	25	0.61	SNP	5.60914
S3600-THY_vs_S3600-LIVER-resent	chr1	44807651	44807651	C	G	Gulp1-Col3a1	n.44807651C>G	intergenic_region	MODIFIER	intergenic_region	64	0	0	103	49	0.475	SNP	5.87402
S3600-THY_vs_S3600-LIVER-resent	chr1	44874787	44874787	T	TCTCTC	Gulp1-Col3a1	n.44874787_44874788insCTCTC	intergenic_region	MODIFIER	intergenic_region	8	0	0	7	7	1	INSERTION.NumRepetitions_9.EventLength_5	3.80855
S3600-THY_vs_S3600-LIVER-resent	chr1	44874972	44874972	C	G	Gulp1-Col3a1	n.44874972C>G	intergenic_region	MODIFIER	intergenic_region	52	0	0	92	39	0.429	SNP	5.92527
S3600-THY_vs_S3600-LIVER-resent	chr1	44936249	44936249	G	C	Gulp1-Col3a1	n.44936249G>C	intergenic_region	MODIFIER	intergenic_region	49	1	0.02	88	43	0.483	SNP	6.04838
S3600-THY_vs_S3600-LIVER-resent	chr1	45016952	45016953	TA	T	Gulp1-Col3a1	n.45016953delA	intergenic_region	MODIFIER	intergenic_region	52	0	0	83	42	0.506	DELETION.NumRepetitions_9.EventLength_1.RepeatExpansion_A	6.54846
S3600-THY_vs_S3600-LIVER-resent	chr1	45112594	45112594	T	G	Gulp1-Col3a1	n.45112594T>G	intergenic_region	MODIFIER	intergenic_region	57	1	0.018	83	44	0.537	SNP	6.04665
S3600-THY_vs_S3600-LIVER-resent	chr1	45186033	45186033	C	G	Gulp1-Col3a1	n.45186033C>G	intergenic_region	MODIFIER	intergenic_region	50	0	0	101	44	0.436	SNP	6.06597
S3600-THY_vs_S3600-LIVER-resent	chr1	45227274	45227274	C	G	Gulp1-Col3a1	n.45227274C>G	intergenic_region	MODIFIER	intergenic_region	57	0	0	105	48	0.462	SNP	5.8219
S3600-THY_vs_S3600-LIVER-resent	chr1	45391163	45391163	C	G	Col5a2	c.2710-34G>C	intron_variant	MODIFIER	transcript	60	0	0	103	36	0.34	SNP	5.92293
S3600-THY_vs_S3600-LIVER-resent	chr1	45517002	45517002	C	G	Col5a2-Wdr75	n.45517002C>G	intergenic_region	MODIFIER	intergenic_region	52	0	0	84	48	0.585	SNP	6.05391
S3600-THY_vs_S3600-LIVER-resent	chr1	45540014	45540014	C	G	Col5a2-Wdr75	n.45540014C>G	intergenic_region	MODIFIER	intergenic_region	79	1	0.013	126	58	0.46	SNP	5.83061
S3600-THY_vs_S3600-LIVER-resent	chr1	45557250	45557250	C	G	Col5a2-Wdr75	n.45557250C>G	intergenic_region	MODIFIER	intergenic_region	78	1	0.013	93	44	0.484	SNP	6.25893
S3600-THY_vs_S3600-LIVER-resent	chr1	45612849	45612849	C	G	Col5a2-Wdr75	n.45612849C>G	intergenic_region	MODIFIER	intergenic_region	56	0	0	89	44	0.483	SNP	6.1567
S3600-THY_vs_S3600-LIVER-resent	chr1	45786171	45786171	C	G	Col5a2-Wdr75	n.45786171C>G	intergenic_region	MODIFIER	intergenic_region	84	0	0	90	39	0.433	SNP	5.86992
S3600-THY_vs_S3600-LIVER-resent	chr1	46018422	46018422	C	G	Stk-ps2	n.*1993G>C	downstream_gene_variant	MODIFIER	transcript	74	0	0	103	39	0.382	SNP	6.12401
S3600-THY_vs_S3600-LIVER-resent	chr1	46790479	46790479	C	G	Dnah7c	c.11434-1287C>G	intron_variant	MODIFIER	transcript	77	0	0	118	56	0.475	SNP	6.17404
S3600-THY_vs_S3600-LIVER-resent	chr1	46797077	46797077	C	G	Dnah7c	c.11765-1116C>G	intron_variant	MODIFIER	transcript	75	0	0	134	66	0.496	SNP	6.02637
S3600-THY_vs_S3600-LIVER-resent	chr1	46861198	46861198	A	C	Slc39a10-Mir6350	n.46861198A>C	intergenic_region	MODIFIER	intergenic_region	60	0	0	109	54	0.495	SNP	6.12554
S3600-THY_vs_S3600-LIVER-resent	chr1	47003021	47003021	C	G	Slc39a10-Mir6350	n.47003021C>G	intergenic_region	MODIFIER	intergenic_region	71	0	0	150	64	0.432	SNP	5.89073
S3600-THY_vs_S3600-LIVER-resent	chr1	47032928	47032928	G	GTCTA	Slc39a10-Mir6350	n.47032928_47032929insTCTA	intergenic_region	MODIFIER	intergenic_region	41	1	0.024	69	34	0.5	INSERTION.NumRepetitions_10orMore.EventLength_4	5.8639
S3600-THY_vs_S3600-LIVER-resent	chr1	47105865	47105865	C	G	Slc39a10-Mir6350	n.47105865C>G	intergenic_region	MODIFIER	intergenic_region	58	0	0	102	24	0.237	SNP	4.96676
S3600-THY_vs_S3600-LIVER-resent	chr1	48414284	48414284	C	G	Mir6350-Tmeff2	n.48414284C>G	intergenic_region	MODIFIER	intergenic_region	50	0	0	108	43	0.402	SNP	6.15889
S3600-THY_vs_S3600-LIVER-resent	chr1	48663905	48663905	T	TGAAAA	Mir6350-Tmeff2	n.48663905_48663906insGAAAA	intergenic_region	MODIFIER	intergenic_region	36	1	0.028	72	35	0.5	INSERTION.NumRepetitions_6.EventLength_5	6.19481
S3600-THY_vs_S3600-LIVER-resent	chr1	49137722	49137723	AT	A	Mir6350-Tmeff2	n.49137723delT	intergenic_region	MODIFIER	intergenic_region	48	0	0	96	47	0.495	DELETION.NumRepetitions_7.EventLength_1.RepeatExpansion_T	5.91698
S3600-THY_vs_S3600-LIVER-resent	chr1	49276854	49276854	A	AAAAG	Mir6350-Tmeff2	n.49276854_49276855insAAAG	intergenic_region	MODIFIER	intergenic_region	21	0	0	43	9	0.227	INSERTION.NumRepetitions_10orMore.EventLength_4	1.60876
S3600-THY_vs_S3600-LIVER-resent	chr1	49524327	49524327	C	G	Mir6350-Tmeff2	n.49524327C>G	intergenic_region	MODIFIER	intergenic_region	45	1	0.022	72	35	0.486	SNP	5.99084
S3600-THY_vs_S3600-LIVER-resent	chr1	49689019	49689019	C	G	Mir6350-Tmeff2	n.49689019C>G	intergenic_region	MODIFIER	intergenic_region	30	0	0	77	45	0.584	SNP	6.06722
S3600-THY_vs_S3600-LIVER-resent	chr1	49806074	49806075	AT	A	Mir6350-Tmeff2	n.49806075delT	intergenic_region	MODIFIER	intergenic_region	69	1	0.015	90	43	0.483	DELETION.NumRepetitions_9.EventLength_1.RepeatExpansion_T	6.07993
S3600-THY_vs_S3600-LIVER-resent	chr1	49887149	49887149	C	G	Mir6350-Tmeff2	n.49887149C>G	intergenic_region	MODIFIER	intergenic_region	50	0	0	79	35	0.443	SNP	5.92725
S3600-THY_vs_S3600-LIVER-resent	chr1	50340296	50340296	T	A	Mir6350-Tmeff2	n.50340296T>A	intergenic_region	MODIFIER	intergenic_region	63	0	0	92	40	0.44	SNP	6.29673
S3600-THY_vs_S3600-LIVER-resent	chr1	50367472	50367472	C	G	Mir6350-Tmeff2	n.50367472C>G	intergenic_region	MODIFIER	intergenic_region	60	0	0	117	62	0.539	SNP	5.99847
S3600-THY_vs_S3600-LIVER-resent	chr1	50814068	50814068	C	G	Mir6350-Tmeff2	n.50814068C>G	intergenic_region	MODIFIER	intergenic_region	66	0	0	109	42	0.385	SNP	6.03667
S3600-THY_vs_S3600-LIVER-resent	chr1	50968901	50968901	C	G	Tmeff2	c.439+25678C>G	intron_variant	MODIFIER	transcript	87	0	0	103	38	0.373	SNP	6.03751
S3600-THY_vs_S3600-LIVER-resent	chr1	51075117	51075117	C	T	Tmeff2	c.536+3553C>T	intron_variant	MODIFIER	transcript	74	0	0	102	46	0.451	SNP	6.24139
S3600-THY_vs_S3600-LIVER-resent	chr1	51127702	51127702	C	G	Tmeff2	c.537-4441C>G	intron_variant	MODIFIER	transcript	61	0	0	123	54	0.443	SNP	6.1394
S3600-THY_vs_S3600-LIVER-resent	chr1	51214912	51214912	C	G	9330175M20Rik	n.*3474G>C	downstream_gene_variant	MODIFIER	transcript	69	0	0	101	39	0.394	SNP	6.2266
S3600-THY_vs_S3600-LIVER-resent	chr1	51296604	51296604	C	G	9330175M20Rik	n.230+31184G>C	intron_variant	MODIFIER	transcript	86	0	0	132	67	0.512	SNP	5.97004
S3600-THY_vs_S3600-LIVER-resent	chr1	51315369	51315369	C	G	9330175M20Rik	n.230+12419G>C	intron_variant	MODIFIER	transcript	83	0	0	125	56	0.447	SNP	5.98959
S3600-THY_vs_S3600-LIVER-resent	chr1	51385532	51385532	C	G	9330175M20Rik-Nabp1	n.51385532C>G	intergenic_region	MODIFIER	intergenic_region	94	1	0.011	137	69	0.504	SNP	5.96583
S3600-THY_vs_S3600-LIVER-resent	chr1	51386982	51386982	C	G	9330175M20Rik-Nabp1	n.51386982C>G	intergenic_region	MODIFIER	intergenic_region	78	1	0.013	111	58	0.523	SNP	5.95906
S3600-THY_vs_S3600-LIVER-resent	chr1	51400191	51400191	C	G	9330175M20Rik-Nabp1	n.51400191C>G	intergenic_region	MODIFIER	intergenic_region	86	0	0	135	58	0.429	SNP	6.18854
S3600-THY_vs_S3600-LIVER-resent	chr1	51413331	51413331	C	G	9330175M20Rik-Nabp1	n.51413331C>G	intergenic_region	MODIFIER	intergenic_region	55	0	0	113	53	0.464	SNP	6.03479
S3600-THY_vs_S3600-LIVER-resent	chr1	51426724	51426724	C	G	9330175M20Rik-Nabp1	n.51426724C>G	intergenic_region	MODIFIER	intergenic_region	64	0	0	121	59	0.492	SNP	6.05561
S3600-THY_vs_S3600-LIVER-resent	chr1	51661835	51661835	C	G	Nabp1-Myo1b	n.51661835C>G	intergenic_region	MODIFIER	intergenic_region	66	0	0	108	56	0.514	SNP	5.75625
S3600-THY_vs_S3600-LIVER-resent	chr1	51763603	51763603	C	G	Myo1b	c.2631+287G>C	intron_variant	MODIFIER	transcript	74	0	0	112	57	0.509	SNP	5.8162
S3600-THY_vs_S3600-LIVER-resent	chr1	51835157	51835157	C	G	Myo1b	c.252-614G>C	intron_variant	MODIFIER	transcript	72	0	0	115	63	0.544	SNP	5.92536
S3600-THY_vs_S3600-LIVER-resent	chr1	51856092	51856092	C	A	Myo1b	c.251+7227G>T	intron_variant	MODIFIER	transcript	75	0	0	124	62	0.5	SNP	5.84209
S3600-THY_vs_S3600-LIVER-resent	chr1	52027887	52027887	C	G	Stat4	c.273+13953C>G	intron_variant	MODIFIER	transcript	80	0	0	129	32	0.256	SNP	5.76253
S3600-THY_vs_S3600-LIVER-resent	chr1	52036928	52036928	C	G	Stat4	c.273+22994C>G	intron_variant	MODIFIER	transcript	69	0	0	100	51	0.51	SNP	5.88043
S3600-THY_vs_S3600-LIVER-resent	chr1	52054450	52054450	C	G	Stat4	c.274-10865C>G	intron_variant	MODIFIER	transcript	65	1	0.015	81	46	0.568	SNP	6.0698
S3600-THY_vs_S3600-LIVER-resent	chr1	52057459	52057459	C	G	Stat4	c.274-7856C>G	intron_variant	MODIFIER	transcript	62	0	0	134	56	0.412	SNP	5.99326
S3600-THY_vs_S3600-LIVER-resent	chr1	52122377	52122377	C	G	Stat1	c.-3-214C>G	intron_variant	MODIFIER	transcript	86	0	0	133	62	0.47	SNP	5.87056
S3600-THY_vs_S3600-LIVER-resent	chr1	52249221	52249221	G	C	Gls-Nab1	n.52249221G>C	intergenic_region	MODIFIER	intergenic_region	88	1	0.012	141	63	0.457	SNP	5.76108
S3600-THY_vs_S3600-LIVER-resent	chr1	52301848	52301848	C	G	Gls-Nab1	n.52301848C>G	intergenic_region	MODIFIER	intergenic_region	96	0	0	138	77	0.558	SNP	5.92322
S3600-THY_vs_S3600-LIVER-resent	chr1	52328330	52328330	C	G	Gls-Nab1	n.52328330C>G	intergenic_region	MODIFIER	intergenic_region	72	0	0	125	53	0.426	SNP	6.16476
S3600-THY_vs_S3600-LIVER-resent	chr1	52512825	52512825	C	G	Nab1-Nemp2	n.52512825C>G	intergenic_region	MODIFIER	intergenic_region	93	0	0	113	52	0.46	SNP	6.11713
S3600-THY_vs_S3600-LIVER-resent	chr1	52515387	52515387	C	G	Nab1-Nemp2	n.52515387C>G	intergenic_region	MODIFIER	intergenic_region	60	0	0	119	42	0.347	SNP	5.86587
S3600-THY_vs_S3600-LIVER-resent	chr1	52524626	52524626	C	G	Nab1-Nemp2	n.52524626C>G	intergenic_region	MODIFIER	intergenic_region	93	0	0	137	67	0.489	SNP	5.82163
S3600-THY_vs_S3600-LIVER-resent	chr1	52524820	52524820	C	T	Nab1-Nemp2	n.52524820C>T	intergenic_region	MODIFIER	intergenic_region	77	0	0	116	59	0.509	SNP	5.91505
S3600-THY_vs_S3600-LIVER-resent	chr1	52733783	52733783	G	C	Mfsd6-Inpp1	n.52733783G>C	intergenic_region	MODIFIER	intergenic_region	60	0	0	123	58	0.475	SNP	5.92739
S3600-THY_vs_S3600-LIVER-resent	chr1	52992146	52992146	C	G	1700019D03Rik-Mstn	n.52992146C>G	intergenic_region	MODIFIER	intergenic_region	66	1	0.015	103	57	0.553	SNP	6.04451
S3600-THY_vs_S3600-LIVER-resent	chr1	53088374	53088374	C	G	Mstn-1700019A02Rik	n.53088374C>G	intergenic_region	MODIFIER	intergenic_region	70	0	0	104	40	0.388	SNP	6.13731
S3600-THY_vs_S3600-LIVER-resent	chr1	53095194	53095194	C	G	Mstn-1700019A02Rik	n.53095194C>G	intergenic_region	MODIFIER	intergenic_region	65	0	0	96	45	0.463	SNP	5.7533
S3600-THY_vs_S3600-LIVER-resent	chr1	53100180	53100180	C	G	Mstn-1700019A02Rik	n.53100180C>G	intergenic_region	MODIFIER	intergenic_region	61	0	0	103	46	0.441	SNP	5.82136
S3600-THY_vs_S3600-LIVER-resent	chr1	53157160	53157160	C	G	1700019A02Rik	c.*1587G>C	downstream_gene_variant	MODIFIER	transcript	77	0	0	103	54	0.524	SNP	5.88372
S3600-THY_vs_S3600-LIVER-resent	chr1	53199875	53199875	C	G	Pms1	c.1818-2573G>C	intron_variant	MODIFIER	transcript	84	0	0	111	46	0.418	SNP	5.92327
S3600-THY_vs_S3600-LIVER-resent	chr1	53313470	53313470	C	G	Osgepl1	c.-1409C>G	upstream_gene_variant	MODIFIER	transcript	87	0	0	129	70	0.543	SNP	5.83656
S3600-THY_vs_S3600-LIVER-resent	chr1	53371451	53371451	C	G	Asnsd1-Dnah7a	n.53371451C>G	intergenic_region	MODIFIER	intergenic_region	61	0	0	93	45	0.478	SNP	6.29792
S3600-THY_vs_S3600-LIVER-resent	chr1	53391491	53391491	C	G	Asnsd1-Dnah7a	n.53391491C>G	intergenic_region	MODIFIER	intergenic_region	88	0	0	113	50	0.45	SNP	5.98409
S3600-THY_vs_S3600-LIVER-resent	chr1	53417519	53417519	C	G	Dnah7a	c.11433+2026G>C	intron_variant	MODIFIER	transcript	89	1	0.011	110	52	0.473	SNP	5.74193
S3600-THY_vs_S3600-LIVER-resent	chr1	53468017	53468017	C	G	Dnah7a	c.9291+603G>C	intron_variant	MODIFIER	transcript	92	0	0	123	54	0.443	SNP	5.9632
S3600-THY_vs_S3600-LIVER-resent	chr1	53474975	53474975	C	G	Dnah7a	c.8946-2020G>C	intron_variant	MODIFIER	transcript	99	0	0	136	67	0.489	SNP	5.71193
S3600-THY_vs_S3600-LIVER-resent	chr1	53521933	53521933	C	G	Dnah7a	c.6286+278G>C	intron_variant	MODIFIER	transcript	83	0	0	120	67	0.555	SNP	6.09922
S3600-THY_vs_S3600-LIVER-resent	chr1	53527696	53527696	C	G	Dnah7a	c.5763+977G>C	intron_variant	MODIFIER	transcript	78	0	0	128	59	0.461	SNP	5.92122
S3600-THY_vs_S3600-LIVER-resent	chr1	53528863	53528863	C	G	Dnah7a	c.5573G>C	missense_variant	MODERATE	transcript	89	0	0	113	45	0.398	SNP	5.92626
S3600-THY_vs_S3600-LIVER-resent	chr1	53812606	53812606	C	G	Hecw2	c.*616G>C	3_prime_UTR_variant	MODIFIER	transcript	81	0	0	125	25	0.202	SNP	5.55788
S3600-THY_vs_S3600-LIVER-resent	chr1	53828878	53828878	G	C	Hecw2	c.4427-908C>G	intron_variant	MODIFIER	transcript	85	0	0	121	61	0.5	SNP	5.65339
S3600-THY_vs_S3600-LIVER-resent	chr1	54066845	54066845	C	G	Hecw2	c.-35-26318G>C	intron_variant	MODIFIER	transcript	65	0	0	111	49	0.441	SNP	6.29365
S3600-THY_vs_S3600-LIVER-resent	chr1	54141588	54141588	C	G	Hecw2	c.-36+53388G>C	intron_variant	MODIFIER	transcript	68	0	0	90	45	0.494	SNP	5.9849
S3600-THY_vs_S3600-LIVER-resent	chr1	54152316	54152316	C	G	Hecw2	c.-36+42660G>C	intron_variant	MODIFIER	transcript	67	0	0	121	56	0.467	SNP	5.72606
S3600-THY_vs_S3600-LIVER-resent	chr1	54158714	54158714	C	G	Hecw2	c.-36+36262G>C	intron_variant	MODIFIER	transcript	76	1	0.013	118	58	0.492	SNP	6.00703
S3600-THY_vs_S3600-LIVER-resent	chr1	54162415	54162415	C	A	Hecw2	c.-36+32561G>T	intron_variant	MODIFIER	transcript	55	0	0	106	52	0.495	SNP	6.05266
S3600-THY_vs_S3600-LIVER-resent	chr1	54169395	54169395	C	G	Hecw2	c.-36+25581G>C	intron_variant	MODIFIER	transcript	70	1	0.015	110	60	0.541	SNP	5.73281
S3600-THY_vs_S3600-LIVER-resent	chr1	54200936	54200936	C	G	Hecw2-Ccdc150	n.54200936C>G	intergenic_region	MODIFIER	intergenic_region	60	0	0	128	64	0.496	SNP	6.01043
S3600-THY_vs_S3600-LIVER-resent	chr1	54202508	54202508	C	T	Hecw2-Ccdc150	n.54202508C>T	intergenic_region	MODIFIER	intergenic_region	64	0	0	109	54	0.491	SNP	5.94105
S3600-THY_vs_S3600-LIVER-resent	chr1	54223058	54223058	C	G	Hecw2-Ccdc150	n.54223058C>G	intergenic_region	MODIFIER	intergenic_region	60	0	0	104	48	0.462	SNP	6.13397
S3600-THY_vs_S3600-LIVER-resent	chr1	54321068	54321068	C	G	Ccdc150	c.1740+6852C>G	intron_variant	MODIFIER	transcript	56	0	0	94	44	0.462	SNP	6.07555
S3600-THY_vs_S3600-LIVER-resent	chr1	54323280	54323280	C	G	Ccdc150	c.1741-5677C>G	intron_variant	MODIFIER	transcript	53	0	0	124	56	0.447	SNP	5.9498
S3600-THY_vs_S3600-LIVER-resent	chr1	54326479	54326479	C	G	Ccdc150	c.1741-2478C>G	intron_variant	MODIFIER	transcript	59	0	0	107	51	0.481	SNP	6.38143
S3600-THY_vs_S3600-LIVER-resent	chr1	54327712	54327712	C	G	Ccdc150	c.1741-1245C>G	intron_variant	MODIFIER	transcript	53	0	0	109	49	0.454	SNP	5.99212
S3600-THY_vs_S3600-LIVER-resent	chr1	54841311	54841311	G	C	Ankrd44	c.28-12616C>G	intron_variant	MODIFIER	transcript	68	0	0	113	54	0.482	SNP	5.79423
S3600-THY_vs_S3600-LIVER-resent	chr1	54901004	54901004	C	T	Ankrd44	c.27+25136G>A	intron_variant	MODIFIER	transcript	92	0	0	120	41	0.339	SNP	6.02635
S3600-THY_vs_S3600-LIVER-resent	chr1	54973426	54973426	G	C	Ankrd44-Sf3b1	n.54973426G>C	intergenic_region	MODIFIER	intergenic_region	31	0	0	53	11	0.208	SNP	2.24181
S3600-THY_vs_S3600-LIVER-resent	chr1	55827911	55827911	G	GAA	Plcl1-9130227L01Rik	n.55827911_55827912insAA	intergenic_region	MODIFIER	intergenic_region	11	0	0	9	8	0.889	INSERTION.NOVEL_1.Novel_A	4.14602
S3600-THY_vs_S3600-LIVER-resent	chr1	55914569	55914569	C	G	Plcl1-9130227L01Rik	n.55914569C>G	intergenic_region	MODIFIER	intergenic_region	66	0	0	104	56	0.525	SNP	6.15686
S3600-THY_vs_S3600-LIVER-resent	chr1	55944329	55944329	C	G	9130227L01Rik	n.237+9909C>G	intron_variant	MODIFIER	transcript	83	0	0	122	43	0.35	SNP	5.95066
S3600-THY_vs_S3600-LIVER-resent	chr1	55973837	55973837	C	G	9130227L01Rik	n.*1739C>G	downstream_gene_variant	MODIFIER	transcript	76	0	0	119	56	0.475	SNP	5.80066
S3600-THY_vs_S3600-LIVER-resent	chr1	55982078	55982078	C	G	9130227L01Rik-1700003I22Rik	n.55982078C>G	intergenic_region	MODIFIER	intergenic_region	96	0	0	142	75	0.532	SNP	6.04086
S3600-THY_vs_S3600-LIVER-resent	chr1	56218923	56218923	G	GT	1700003I22Rik-Hsfy2	n.56218923_56218924insT	intergenic_region	MODIFIER	intergenic_region	71	0	0	98	26	0.268	INSERTION.NumRepetitions_8.EventLength_1.RepeatExpansion_T	6.52975
S3600-THY_vs_S3600-LIVER-resent	chr1	56672949	56672949	G	GGAAA	Hsfy2-Satb2	n.56672949_56672950insGAAA	intergenic_region	MODIFIER	intergenic_region	15	0	0	25	10	0.375	INSERTION.NumRepetitions_10orMore.EventLength_4	2.20171
S3600-THY_vs_S3600-LIVER-resent	chr1	56931671	56931671	G	C	Satb2	c.346+16408C>G	intron_variant	MODIFIER	transcript	60	0	0	95	35	0.37	SNP	5.92095
S3600-THY_vs_S3600-LIVER-resent	chr1	57038977	57038977	C	G	9130024F11Rik-BC055402	n.57038977C>G	intergenic_region	MODIFIER	intergenic_region	58	0	0	109	51	0.462	SNP	5.98803
S3600-THY_vs_S3600-LIVER-resent	chr1	57217802	57217802	C	G	BC055402	n.-2806G>C	upstream_gene_variant	MODIFIER	transcript	87	0	0	104	47	0.452	SNP	5.89619
S3600-THY_vs_S3600-LIVER-resent	chr1	57224483	57224483	C	G	BC055402-4930558J18Rik	n.57224483C>G	intergenic_region	MODIFIER	intergenic_region	68	0	0	108	47	0.434	SNP	6.34755
S3600-THY_vs_S3600-LIVER-resent	chr1	57287639	57287639	G	T	BC055402-4930558J18Rik	n.57287639G>T	intergenic_region	MODIFIER	intergenic_region	69	0	0	94	27	0.283	SNP	6.0712
S3600-THY_vs_S3600-LIVER-resent	chr1	57288185	57288185	C	G	BC055402-4930558J18Rik	n.57288185C>G	intergenic_region	MODIFIER	intergenic_region	60	0	0	89	34	0.375	SNP	6.09103
S3600-THY_vs_S3600-LIVER-resent	chr1	57538632	57538632	C	G	9430016H08Rik-Spats2l	n.57538632C>G	intergenic_region	MODIFIER	intergenic_region	78	1	0.013	96	51	0.532	SNP	5.70577
S3600-THY_vs_S3600-LIVER-resent	chr1	57566256	57566256	C	A	9430016H08Rik-Spats2l	n.57566256C>A	intergenic_region	MODIFIER	intergenic_region	69	0	0	136	55	0.407	SNP	6.1811
S3600-THY_vs_S3600-LIVER-resent	chr1	57741033	57741033	C	G	9430016H08Rik-Spats2l	n.57741033C>G	intergenic_region	MODIFIER	intergenic_region	74	0	0	114	51	0.447	SNP	5.83434
S3600-THY_vs_S3600-LIVER-resent	chr1	57742142	57742142	C	A	9430016H08Rik-Spats2l	n.57742142C>A	intergenic_region	MODIFIER	intergenic_region	90	0	0	97	47	0.479	SNP	5.87001
S3600-THY_vs_S3600-LIVER-resent	chr1	57749996	57749996	C	G	9430016H08Rik-Spats2l	n.57749996C>G	intergenic_region	MODIFIER	intergenic_region	65	0	0	126	62	0.5	SNP	6.26032
S3600-THY_vs_S3600-LIVER-resent	chr1	57797903	57797903	C	G	Spats2l	c.-97-1402C>G	intron_variant	MODIFIER	transcript	80	0	0	114	54	0.477	SNP	6.23384
S3600-THY_vs_S3600-LIVER-resent	chr1	57807501	57807501	C	G	Spats2l	c.-48+8147C>G	intron_variant	MODIFIER	transcript	45	0	0	55	30	0.545	SNP	6.26777
S3600-THY_vs_S3600-LIVER-resent	chr1	57867135	57867135	C	G	Spats2l	c.99+11611C>G	intron_variant	MODIFIER	transcript	78	0	0	113	42	0.366	SNP	5.73374
S3600-THY_vs_S3600-LIVER-resent	chr1	57927462	57927462	C	G	Spats2l	c.907+4038C>G	intron_variant	MODIFIER	transcript	71	0	0	118	62	0.53	SNP	5.99773
S3600-THY_vs_S3600-LIVER-resent	chr1	57928918	57928918	C	A	Spats2l	c.907+5494C>A	intron_variant	MODIFIER	transcript	84	0	0	117	53	0.469	SNP	6.21726
S3600-THY_vs_S3600-LIVER-resent	chr1	57957311	57957311	C	G	Kctd18	c.798-491G>C	intron_variant	MODIFIER	transcript	106	0	0	133	58	0.435	SNP	5.80974
S3600-THY_vs_S3600-LIVER-resent	chr1	57985362	57985362	C	G	Sgol2a	n.57985362C>G	intragenic_variant	MODIFIER	gene_variant	73	0	0	141	66	0.468	SNP	6.11981
S3600-THY_vs_S3600-LIVER-resent	chr1	58063175	58063175	C	G	Aox1	c.1446-197C>G	intron_variant	MODIFIER	transcript	69	0	0	97	49	0.505	SNP	6.12672
S3600-THY_vs_S3600-LIVER-resent	chr1	58083314	58083314	C	G	Aox1	c.2832+1111C>G	intron_variant	MODIFIER	transcript	91	0	0	106	50	0.462	SNP	5.93119
S3600-THY_vs_S3600-LIVER-resent	chr1	58103800	58103800	C	G	Aox1	c.3595-519C>G	intron_variant	MODIFIER	transcript	73	0	0	116	63	0.543	SNP	5.88216
S3600-THY_vs_S3600-LIVER-resent	chr1	58127466	58127466	C	G	Aox3	c.508-161C>G	intron_variant	MODIFIER	transcript	72	0	0	89	44	0.5	SNP	6.0851
S3600-THY_vs_S3600-LIVER-resent	chr1	58151459	58151459	C	G	Aox3	c.1263+1055C>G	intron_variant	MODIFIER	transcript	71	1	0.014	115	53	0.451	SNP	6.10764
S3600-THY_vs_S3600-LIVER-resent	chr1	58206987	58206987	C	G	Aox4	c.-3588C>G	upstream_gene_variant	MODIFIER	transcript	56	0	0	106	51	0.476	SNP	6.09778
S3600-THY_vs_S3600-LIVER-resent	chr1	58220124	58220124	C	G	Aox4	c.318+29C>G	intron_variant	MODIFIER	transcript	42	0	0	100	57	0.57	SNP	5.82976
S3600-THY_vs_S3600-LIVER-resent	chr1	58361734	58361734	C	G	Aox2	c.3984+2649C>G	intron_variant	MODIFIER	transcript	62	0	0	107	61	0.57	SNP	5.98627
S3600-THY_vs_S3600-LIVER-resent	chr1	59098689	59098689	G	C	Als2cr11	c.-3829C>G	upstream_gene_variant	MODIFIER	transcript	82	0	0	128	64	0.496	SNP	5.86254
S3600-THY_vs_S3600-LIVER-resent	chr1	59124467	59124467	G	C	Tmem237	c.-4453C>G	upstream_gene_variant	MODIFIER	transcript	76	0	0	131	36	0.275	SNP	6.24768
S3600-THY_vs_S3600-LIVER-resent	chr1	59288026	59288026	G	C	Cdk15	c.724+141G>C	intron_variant	MODIFIER	transcript	84	0	0	131	61	0.469	SNP	6.01113
S3600-THY_vs_S3600-LIVER-resent	chr1	60399351	60399351	C	G	Cyp20a1-Abi2	n.60399351C>G	intergenic_region	MODIFIER	intergenic_region	86	0	0	126	30	0.24	SNP	5.90993
S3600-THY_vs_S3600-LIVER-resent	chr1	60532085	60532085	G	C	Raph1	c.120+1202C>G	intron_variant	MODIFIER	transcript	77	0	0	141	78	0.553	SNP	6.14412
S3600-THY_vs_S3600-LIVER-resent	chr1	61355351	61355351	C	G	Icos-9530026F06Rik	n.61355351C>G	intergenic_region	MODIFIER	intergenic_region	67	0	0	116	58	0.491	SNP	5.89906
S3600-THY_vs_S3600-LIVER-resent	chr1	61432722	61432722	C	G	9530026F06Rik-Pard3b	n.61432722C>G	intergenic_region	MODIFIER	intergenic_region	52	0	0	82	23	0.272	SNP	5.19677
S3600-THY_vs_S3600-LIVER-resent	chr1	61529299	61529299	C	G	9530026F06Rik-Pard3b	n.61529299C>G	intergenic_region	MODIFIER	intergenic_region	75	0	0	112	54	0.482	SNP	5.98132
S3600-THY_vs_S3600-LIVER-resent	chr1	61557356	61557356	C	G	9530026F06Rik-Pard3b	n.61557356C>G	intergenic_region	MODIFIER	intergenic_region	77	0	0	125	60	0.488	SNP	5.87702
S3600-THY_vs_S3600-LIVER-resent	chr1	61566402	61566402	C	G	9530026F06Rik-Pard3b	n.61566402C>G	intergenic_region	MODIFIER	intergenic_region	55	1	0.018	106	62	0.581	SNP	5.89275
S3600-THY_vs_S3600-LIVER-resent	chr1	61637160	61637160	C	G	Pard3b	c.-2083C>G	upstream_gene_variant	MODIFIER	transcript	53	0	0	74	32	0.432	SNP	6.10032
S3600-THY_vs_S3600-LIVER-resent	chr1	61677604	61677604	C	G	Pard3b	c.120+38242C>G	intron_variant	MODIFIER	transcript	58	0	0	108	46	0.425	SNP	5.96805
S3600-THY_vs_S3600-LIVER-resent	chr1	61707235	61707235	C	G	Pard3b	c.121-60713C>G	intron_variant	MODIFIER	transcript	68	0	0	108	43	0.402	SNP	6.31581
S3600-THY_vs_S3600-LIVER-resent	chr1	61734974	61734974	C	G	Pard3b	c.121-32974C>G	intron_variant	MODIFIER	transcript	77	0	0	135	69	0.504	SNP	6.17336
S3600-THY_vs_S3600-LIVER-resent	chr1	61781205	61781205	C	G	Pard3b	c.222+13156C>G	intron_variant	MODIFIER	transcript	74	0	0	107	55	0.509	SNP	5.91174
S3600-THY_vs_S3600-LIVER-resent	chr1	61787824	61787824	C	G	Pard3b	c.222+19775C>G	intron_variant	MODIFIER	transcript	64	0	0	122	62	0.508	SNP	5.86219
S3600-THY_vs_S3600-LIVER-resent	chr1	61790304	61790304	C	G	Pard3b	c.222+22255C>G	intron_variant	MODIFIER	transcript	62	0	0	107	49	0.458	SNP	5.8583
S3600-THY_vs_S3600-LIVER-resent	chr1	61814560	61814560	C	G	Pard3b	c.222+46511C>G	intron_variant	MODIFIER	transcript	64	0	0	117	54	0.457	SNP	5.97253
S3600-THY_vs_S3600-LIVER-resent	chr1	61952425	61952425	C	G	Pard3b	c.223-57882C>G	intron_variant	MODIFIER	transcript	80	0	0	91	46	0.505	SNP	6.15497
S3600-THY_vs_S3600-LIVER-resent	chr1	62029959	62029959	C	G	Pard3b	c.394+19481C>G	intron_variant	MODIFIER	transcript	82	0	0	110	52	0.472	SNP	6.35373
S3600-THY_vs_S3600-LIVER-resent	chr1	62075666	62075666	C	G	Pard3b	c.395-719C>G	intron_variant	MODIFIER	transcript	66	0	0	97	34	0.358	SNP	6.001
S3600-THY_vs_S3600-LIVER-resent	chr1	62162458	62162458	C	G	Pard3b	c.1165+990C>G	intron_variant	MODIFIER	transcript	77	0	0	116	55	0.482	SNP	5.81317
S3600-THY_vs_S3600-LIVER-resent	chr1	62202377	62202377	C	G	Pard3b	c.1620+3615C>G	intron_variant	MODIFIER	transcript	68	0	0	103	43	0.426	SNP	5.85875
S3600-THY_vs_S3600-LIVER-resent	chr1	62259066	62259066	A	AT	Pard3b	c.2141-16817_2141-16816insT	intron_variant	MODIFIER	transcript	70	1	0.014	104	56	0.534	INSERTION.NumRepetitions_9.EventLength_1.RepeatExpansion_T	5.93528
S3600-THY_vs_S3600-LIVER-resent	chr1	62286818	62286818	C	G	Pard3b	c.2185+10891C>G	intron_variant	MODIFIER	transcript	54	0	0	114	58	0.518	SNP	5.81444
S3600-THY_vs_S3600-LIVER-resent	chr1	62335712	62335712	G	C	Pard3b	c.2186-8222G>C	intron_variant	MODIFIER	transcript	78	0	0	108	43	0.393	SNP	5.94027
S3600-THY_vs_S3600-LIVER-resent	chr1	62385324	62385324	C	G	Pard3b	c.2630+40217C>G	intron_variant	MODIFIER	transcript	71	0	0	113	61	0.56	SNP	5.99782
S3600-THY_vs_S3600-LIVER-resent	chr1	62405376	62405376	C	G	Pard3b	c.2631-34635C>G	intron_variant	MODIFIER	transcript	74	0	0	115	56	0.491	SNP	5.83567
S3600-THY_vs_S3600-LIVER-resent	chr1	62439191	62439191	T	TCAGCCA	Pard3b	c.2631-820_2631-819insCAGCCA	intron_variant	MODIFIER	transcript	38	0	0	52	26	0.537	INSERTION.NumRepetitions_8.EventLength_6	6.06463
S3600-THY_vs_S3600-LIVER-resent	chr1	62578362	62578362	C	T	Pard3b	c.3175-9375C>T	intron_variant	MODIFIER	transcript	73	1	0.014	110	42	0.382	SNP	5.73898
S3600-THY_vs_S3600-LIVER-resent	chr1	62644814	62644814	C	G	Pard3b	c.*6891C>G	downstream_gene_variant	MODIFIER	transcript	78	0	0	108	58	0.537	SNP	6.03184
S3600-THY_vs_S3600-LIVER-resent	chr1	62755848	62755848	C	G	Nrp2	c.1147-4927C>G	intron_variant	MODIFIER	transcript	43	0	0	64	32	0.5	SNP	5.98319
S3600-THY_vs_S3600-LIVER-resent	chr1	62768394	62768394	C	G	Nrp2	c.1787-606C>G	intron_variant	MODIFIER	transcript	65	0	0	119	50	0.424	SNP	5.80742
S3600-THY_vs_S3600-LIVER-resent	chr1	62783954	62783954	C	G	Nrp2	c.2307+398C>G	intron_variant	MODIFIER	transcript	80	1	0.013	90	48	0.534	SNP	5.84547
S3600-THY_vs_S3600-LIVER-resent	chr1	62904393	62904393	C	G	Nrp2-Ino80d	n.62904393C>G	intergenic_region	MODIFIER	intergenic_region	80	1	0.013	103	49	0.48	SNP	6.17011
S3600-THY_vs_S3600-LIVER-resent	chr1	63058438	63058438	C	G	Ino80d	c.2611G>C	missense_variant	MODERATE	transcript	77	0	0	143	65	0.458	SNP	6.00299
S3600-THY_vs_S3600-LIVER-resent	chr1	63068695	63068695	C	G	Ino80d	c.1284-402G>C	intron_variant	MODIFIER	transcript	76	0	0	128	73	0.567	SNP	6.04858
S3600-THY_vs_S3600-LIVER-resent	chr1	63110604	63110604	C	G	Ino80dos	n.-4136C>G	upstream_gene_variant	MODIFIER	transcript	83	0	0	99	41	0.414	SNP	6.17122
S3600-THY_vs_S3600-LIVER-resent	chr1	63140316	63140316	G	C	Ndufs1	c.*3515C>G	downstream_gene_variant	MODIFIER	transcript	81	0	0	107	48	0.443	SNP	6.32233
S3600-THY_vs_S3600-LIVER-resent	chr1	63177147	63177147	C	G	Eef1b2	c.-65C>G	5_prime_UTR_variant	MODIFIER	transcript	78	0	0	97	42	0.427	SNP	6.15445
S3600-THY_vs_S3600-LIVER-resent	chr1	63189240	63189240	C	G	Gpr1	c.-30-5136G>C	intron_variant	MODIFIER	transcript	75	0	0	117	47	0.407	SNP	6.09139
S3600-THY_vs_S3600-LIVER-resent	chr1	63327018	63327018	C	G	Zdbf2-Adam23	n.63327018C>G	intergenic_region	MODIFIER	intergenic_region	72	0	0	93	50	0.538	SNP	6.41268
S3600-THY_vs_S3600-LIVER-resent	chr1	63417856	63417856	C	G	Zdbf2-Adam23	n.63417856C>G	intergenic_region	MODIFIER	intergenic_region	71	0	0	96	44	0.458	SNP	6.10443
S3600-THY_vs_S3600-LIVER-resent	chr1	63476249	63476249	C	T	Adam23	c.424-1430C>T	intron_variant	MODIFIER	transcript	56	0	0	112	55	0.505	SNP	5.82489
S3600-THY_vs_S3600-LIVER-resent	chr1	63507910	63507910	C	G	Adam23	c.501-7667C>G	intron_variant	MODIFIER	transcript	73	0	0	110	52	0.473	SNP	6.18109
S3600-THY_vs_S3600-LIVER-resent	chr1	63540118	63540118	C	G	Adam23	c.925-3001C>G	intron_variant	MODIFIER	transcript	67	1	0.015	92	35	0.385	SNP	5.75021
S3600-THY_vs_S3600-LIVER-resent	chr1	63543131	63543131	C	T	Adam23	c.937C>T	missense_variant	MODERATE	transcript	82	0	0	120	64	0.525	SNP	5.89594
S3600-THY_vs_S3600-LIVER-resent	chr1	63545598	63545598	C	G	Adam23	c.1160+4C>G	splice_region_variant&intron_variant	LOW	transcript	70	0	0	108	52	0.481	SNP	5.82421
S3600-THY_vs_S3600-LIVER-resent	chr1	63623870	63623870	C	G	Dytn	c.1826-719G>C	intron_variant	MODIFIER	transcript	75	0	0	125	64	0.52	SNP	5.74775
S3600-THY_vs_S3600-LIVER-resent	chr1	63637055	63637055	C	G	Dytn	c.1345-3157G>C	intron_variant	MODIFIER	transcript	76	0	0	112	58	0.514	SNP	6.04368
S3600-THY_vs_S3600-LIVER-resent	chr1	63646937	63646937	C	G	Dytn	c.1113+460G>C	intron_variant	MODIFIER	transcript	46	0	0	71	38	0.535	SNP	6.22614
S3600-THY_vs_S3600-LIVER-resent	chr1	63725067	63725067	C	G	Mdh1b	c.135+541G>C	intron_variant	MODIFIER	transcript	76	0	0	113	60	0.531	SNP	5.95292
S3600-THY_vs_S3600-LIVER-resent	chr1	63844930	63844930	C	G	4933402D24Rik-Gm13749	n.63844930C>G	intergenic_region	MODIFIER	intergenic_region	69	0	0	103	55	0.52	SNP	6.03519
S3600-THY_vs_S3600-LIVER-resent	chr1	63877102	63877102	C	G	4933402D24Rik-Gm13749	n.63877102C>G	intergenic_region	MODIFIER	intergenic_region	70	0	0	111	45	0.409	SNP	6.04255
S3600-THY_vs_S3600-LIVER-resent	chr1	63922240	63922240	C	G	4933402D24Rik-Gm13749	n.63922240C>G	intergenic_region	MODIFIER	intergenic_region	62	0	0	101	51	0.505	SNP	6.18425
S3600-THY_vs_S3600-LIVER-resent	chr1	63944112	63944112	C	A	4933402D24Rik-Gm13749	n.63944112C>A	intergenic_region	MODIFIER	intergenic_region	76	0	0	112	43	0.387	SNP	6.06966
S3600-THY_vs_S3600-LIVER-resent	chr1	63958326	63958326	C	G	4933402D24Rik-Gm13749	n.63958326C>G	intergenic_region	MODIFIER	intergenic_region	50	0	0	88	34	0.386	SNP	6.13269
S3600-THY_vs_S3600-LIVER-resent	chr1	63964499	63964499	C	G	Gm13749	n.-228C>G	upstream_gene_variant	MODIFIER	transcript	78	1	0.013	112	55	0.491	SNP	6.11935
S3600-THY_vs_S3600-LIVER-resent	chr1	64002477	64002477	C	G	Mir1958-Klf7	n.64002477C>G	intergenic_region	MODIFIER	intergenic_region	74	0	0	105	60	0.563	SNP	5.67647
S3600-THY_vs_S3600-LIVER-resent	chr1	64014084	64014084	T	TACAC	Mir1958-Klf7	n.64014084_64014085insACAC	intergenic_region	MODIFIER	intergenic_region	34	1	0.029	28	27	0.968	INSERTION.NumRepetitions_10orMore.EventLength_2.RepeatExpansion_AC	6.22728
S3600-THY_vs_S3600-LIVER-resent	chr1	64021332	64021332	C	G	Mir1958-Klf7	n.64021332C>G	intergenic_region	MODIFIER	intergenic_region	70	0	0	78	40	0.513	SNP	5.72368
S3600-THY_vs_S3600-LIVER-resent	chr1	64202607	64202607	C	G	Klf7-Creb1	n.64202607C>G	intergenic_region	MODIFIER	intergenic_region	64	1	0.016	88	28	0.322	SNP	5.8921
S3600-THY_vs_S3600-LIVER-resent	chr1	64211194	64211194	C	G	Klf7-Creb1	n.64211194C>G	intergenic_region	MODIFIER	intergenic_region	83	0	0	110	55	0.495	SNP	5.71346
S3600-THY_vs_S3600-LIVER-resent	chr1	64216935	64216935	C	G	Klf7-Creb1	n.64216935C>G	intergenic_region	MODIFIER	intergenic_region	100	0	0	155	60	0.387	SNP	5.77555
S3600-THY_vs_S3600-LIVER-resent	chr1	64226458	64226458	C	G	Klf7-Creb1	n.64226458C>G	intergenic_region	MODIFIER	intergenic_region	80	0	0	113	59	0.527	SNP	5.8824
S3600-THY_vs_S3600-LIVER-resent	chr1	64255419	64255419	C	G	Klf7-Creb1	n.64255419C>G	intergenic_region	MODIFIER	intergenic_region	44	0	0	69	35	0.507	SNP	6.21135
S3600-THY_vs_S3600-LIVER-resent	chr1	64717032	64717032	C	G	Ccnyl1	c.430-1099C>G	intron_variant	MODIFIER	transcript	68	0	0	122	33	0.264	SNP	6.42647
S3600-THY_vs_S3600-LIVER-resent	chr1	64745022	64745022	G	C	Fzd5-Plekhm3	n.64745022G>C	intergenic_region	MODIFIER	intergenic_region	101	0	0	114	55	0.482	SNP	6.15965
S3600-THY_vs_S3600-LIVER-resent	chr1	64829292	64829292	G	C	Plekhm3	c.1951-9199C>G	intron_variant	MODIFIER	transcript	82	0	0	117	61	0.526	SNP	5.72713
S3600-THY_vs_S3600-LIVER-resent	chr1	64893966	64893966	G	C	Plekhm3	c.1547-1069C>G	intron_variant	MODIFIER	transcript	69	0	0	122	61	0.496	SNP	6.13466
S3600-THY_vs_S3600-LIVER-resent	chr1	64901941	64901941	G	C	Plekhm3	c.1547-9044C>G	intron_variant	MODIFIER	transcript	103	1	0.009804	138	67	0.489	SNP	5.87761
S3600-THY_vs_S3600-LIVER-resent	chr1	64919296	64919296	G	C	Plekhm3	c.1546+2254C>G	intron_variant	MODIFIER	transcript	72	0	0	135	65	0.485	SNP	6.19661
S3600-THY_vs_S3600-LIVER-resent	chr1	64927910	64927910	G	C	Plekhm3	c.614-5428C>G	intron_variant	MODIFIER	transcript	84	0	0	119	59	0.496	SNP	5.78001
S3600-THY_vs_S3600-LIVER-resent	chr1	64938575	64938575	G	C	Plekhm3	c.-230-36C>G	intron_variant	MODIFIER	transcript	83	0	0	102	44	0.431	SNP	5.8434
S3600-THY_vs_S3600-LIVER-resent	chr1	64979518	64979518	C	CCCTT	Plekhm3-Akr1cl	n.64979518_64979519insCCTT	intergenic_region	MODIFIER	intergenic_region	31	0	0	45	15	0.333	INSERTION.NumRepetitions_10orMore.EventLength_4	3.70423
S3600-THY_vs_S3600-LIVER-resent	chr1	65144298	65144298	C	G	D630023F18Rik-Idh1	n.65144298C>G	intergenic_region	MODIFIER	intergenic_region	68	0	0	93	46	0.495	SNP	5.93321
S3600-THY_vs_S3600-LIVER-resent	chr1	65221765	65221765	C	G	Pikfyve	c.1209-505C>G	intron_variant	MODIFIER	transcript	85	0	0	124	56	0.452	SNP	5.87458
S3600-THY_vs_S3600-LIVER-resent	chr1	65361792	65361792	C	G	Pth2r	c.909-1460C>G	intron_variant	MODIFIER	transcript	68	0	0	104	50	0.485	SNP	5.98459
S3600-THY_vs_S3600-LIVER-resent	chr1	65385839	65385839	C	G	Pth2r	c.1207-462C>G	intron_variant	MODIFIER	transcript	67	0	0	96	54	0.558	SNP	5.86495
S3600-THY_vs_S3600-LIVER-resent	chr1	65389995	65389995	C	G	Pth2r	c.*1185C>G	downstream_gene_variant	MODIFIER	transcript	14	0	0	42	34	0.805	SNP	7.25894
S3600-THY_vs_S3600-LIVER-resent	chr1	65408437	65408437	C	G	Pth2r-Crygf	n.65408437C>G	intergenic_region	MODIFIER	intergenic_region	62	0	0	132	59	0.447	SNP	5.79974
S3600-THY_vs_S3600-LIVER-resent	chr1	65461062	65461062	C	G	Pth2r-Crygf	n.65461062C>G	intergenic_region	MODIFIER	intergenic_region	81	0	0	89	46	0.517	SNP	5.7558
S3600-THY_vs_S3600-LIVER-resent	chr1	65462117	65462117	C	G	Pth2r-Crygf	n.65462117C>G	intergenic_region	MODIFIER	intergenic_region	63	0	0	100	54	0.541	SNP	5.92451
S3600-THY_vs_S3600-LIVER-resent	chr1	65518410	65518410	G	C	Pth2r-Crygf	n.65518410G>C	intergenic_region	MODIFIER	intergenic_region	60	0	0	123	60	0.488	SNP	6.20003
S3600-THY_vs_S3600-LIVER-resent	chr1	65673822	65673822	C	G	Pth2r-Crygf	n.65673822C>G	intergenic_region	MODIFIER	intergenic_region	75	1	0.014	88	40	0.455	SNP	6.35737
S3600-THY_vs_S3600-LIVER-resent	chr1	65823915	65823921	GGTGTGT	G	Pth2r-Crygf	n.65823916_65823921delGTGTGT	intergenic_region	MODIFIER	intergenic_region	25	0	0	33	11	0.5	DELETION.NumRepetitions_10orMore.EventLength_2.RepeatExpansion_GT	2.87182
S3600-THY_vs_S3600-LIVER-resent	chr1	66030611	66030611	C	G	Crygf-Map2	n.66030611C>G	intergenic_region	MODIFIER	intergenic_region	54	0	0	111	59	0.527	SNP	6.14228
S3600-THY_vs_S3600-LIVER-resent	chr1	66094610	66094610	C	G	Crygf-Map2	n.66094610C>G	intergenic_region	MODIFIER	intergenic_region	56	0	0	99	50	0.505	SNP	5.72431
S3600-THY_vs_S3600-LIVER-resent	chr1	66127333	66127333	C	G	Crygf-Map2	n.66127333C>G	intergenic_region	MODIFIER	intergenic_region	62	0	0	113	47	0.42	SNP	6.14323
S3600-THY_vs_S3600-LIVER-resent	chr1	66269044	66269044	T	C	Map2	n.66269044T>C	intragenic_variant	MODIFIER	gene_variant	66	0	0	118	58	0.509	SNP	6.00764
S3600-THY_vs_S3600-LIVER-resent	chr1	66575144	66575144	G	A	Unc80	c.3849+5142G>A	intron_variant	MODIFIER	transcript	71	1	0.014	106	103	0.971	SNP	5.92651
S3600-THY_vs_S3600-LIVER-resent	chr1	66657299	66657299	C	T	Unc80	c.7811+2697C>T	intron_variant	MODIFIER	transcript	81	0	0	111	61	0.55	SNP	6.14454
S3600-THY_vs_S3600-LIVER-resent	chr1	66849328	66849328	C	G	Acadl	c.537-862G>C	intron_variant	MODIFIER	transcript	83	0	0	122	55	0.445	SNP	6.0784
S3600-THY_vs_S3600-LIVER-resent	chr1	66857530	66857530	C	G	Acadl	c.102G>C	synonymous_variant	LOW	transcript	80	0	0	102	51	0.5	SNP	6.00703
S3600-THY_vs_S3600-LIVER-resent	chr1	67035455	67035455	C	G	Lancl1	c.82-1214G>C	intron_variant	MODIFIER	transcript	82	0	0	108	48	0.444	SNP	6.30044
S3600-THY_vs_S3600-LIVER-resent	chr1	67133527	67133527	C	G	Cps1	c.127-6230C>G	intron_variant	MODIFIER	transcript	75	0	0	94	43	0.473	SNP	6.04236
S3600-THY_vs_S3600-LIVER-resent	chr1	67154520	67154520	T	TTTTC	Cps1	c.712-1613_712-1612insTTTC	intron_variant	MODIFIER	transcript	27	0	0	32	32	1	INSERTION.NumRepetitions_10orMore.EventLength_4	5.99578
S3600-THY_vs_S3600-LIVER-resent	chr1	67398976	67398976	C	G	Cps1-Erbb4	n.67398976C>G	intergenic_region	MODIFIER	intergenic_region	65	0	0	106	52	0.491	SNP	5.95591
S3600-THY_vs_S3600-LIVER-resent	chr1	67502229	67502229	C	G	Cps1-Erbb4	n.67502229C>G	intergenic_region	MODIFIER	intergenic_region	69	0	0	112	57	0.509	SNP	5.97515
S3600-THY_vs_S3600-LIVER-resent	chr1	67841356	67841356	A	AAC	Cps1-Erbb4	n.67841356_67841357insAC	intergenic_region	MODIFIER	intergenic_region	44	1	0.023	51	44	0.86	INSERTION.NumRepetitions_10orMore.EventLength_2.RepeatExpansion_AC	5.86725
S3600-THY_vs_S3600-LIVER-resent	chr1	67861295	67861295	C	T	Cps1-Erbb4	n.67861295C>T	intergenic_region	MODIFIER	intergenic_region	56	0	0	114	52	0.46	SNP	5.97678
S3600-THY_vs_S3600-LIVER-resent	chr1	68352956	68352956	C	G	Erbb4	c.623-3537G>C	intron_variant	MODIFIER	transcript	65	0	0	83	37	0.446	SNP	5.67199
S3600-THY_vs_S3600-LIVER-resent	chr1	68683005	68683005	C	A	Erbb4	c.234+57377G>T	intron_variant	MODIFIER	transcript	69	1	0.015	91	43	0.46	SNP	6.12279
S3600-THY_vs_S3600-LIVER-resent	chr1	68753408	68753408	C	G	Erbb4	c.83-12875G>C	intron_variant	MODIFIER	transcript	97	0	0	118	64	0.542	SNP	5.62807
S3600-THY_vs_S3600-LIVER-resent	chr1	68821982	68821982	C	G	Erbb4	c.83-81449G>C	intron_variant	MODIFIER	transcript	86	0	0	120	61	0.504	SNP	5.95027
S3600-THY_vs_S3600-LIVER-resent	chr1	68960838	68960838	C	G	Erbb4	c.82+146837G>C	intron_variant	MODIFIER	transcript	77	0	0	140	67	0.478	SNP	5.89798
S3600-THY_vs_S3600-LIVER-resent	chr1	68980928	68980928	C	G	Erbb4	c.82+126747G>C	intron_variant	MODIFIER	transcript	72	0	0	136	59	0.437	SNP	5.79106
S3600-THY_vs_S3600-LIVER-resent	chr1	68993001	68993001	C	G	Erbb4	c.82+114674G>C	intron_variant	MODIFIER	transcript	87	0	0	113	51	0.45	SNP	6.3253
S3600-THY_vs_S3600-LIVER-resent	chr1	69133201	69133201	C	G	Erbb4-Ikzf2	n.69133201C>G	intergenic_region	MODIFIER	intergenic_region	93	0	0	148	68	0.462	SNP	5.76988
S3600-THY_vs_S3600-LIVER-resent	chr1	69331793	69331793	G	C	Erbb4-Ikzf2	n.69331793G>C	intergenic_region	MODIFIER	intergenic_region	70	0	0	129	62	0.48	SNP	6.01041
S3600-THY_vs_S3600-LIVER-resent	chr1	69344871	69344871	G	C	Erbb4-Ikzf2	n.69344871G>C	intergenic_region	MODIFIER	intergenic_region	82	0	0	121	26	0.217	SNP	5.83894
S3600-THY_vs_S3600-LIVER-resent	chr1	69493889	69493889	C	G	Erbb4-Ikzf2	n.69493889C>G	intergenic_region	MODIFIER	intergenic_region	90	0	0	147	36	0.25	SNP	5.90375
S3600-THY_vs_S3600-LIVER-resent	chr1	69652880	69652880	C	G	Ikzf2	c.139+30330G>C	intron_variant	MODIFIER	transcript	63	0	0	114	52	0.456	SNP	5.73546
S3600-THY_vs_S3600-LIVER-resent	chr1	69680385	69680385	G	C	Ikzf2	c.139+2825C>G	intron_variant	MODIFIER	transcript	90	0	0	112	61	0.55	SNP	5.87958
S3600-THY_vs_S3600-LIVER-resent	chr1	69690895	69690895	G	C	Ikzf2	c.-6738C>G	upstream_gene_variant	MODIFIER	transcript	91	0	0	132	60	0.462	SNP	5.9095
S3600-THY_vs_S3600-LIVER-resent	chr1	69769860	69769860	C	G	Ikzf2-Spag16	n.69769860C>G	intergenic_region	MODIFIER	intergenic_region	80	0	0	129	62	0.484	SNP	6.07723
S3600-THY_vs_S3600-LIVER-resent	chr1	69924946	69924946	C	G	Spag16	c.966+28365C>G	intron_variant	MODIFIER	transcript	61	0	0	122	65	0.529	SNP	5.91271
S3600-THY_vs_S3600-LIVER-resent	chr1	69988220	69988220	C	G	Spag16	c.967-8561C>G	intron_variant	MODIFIER	transcript	73	1	0.014	91	44	0.484	SNP	5.93724
S3600-THY_vs_S3600-LIVER-resent	chr1	70075770	70075770	C	G	Spag16	c.1094+78862C>G	intron_variant	MODIFIER	transcript	69	0	0	122	58	0.475	SNP	5.84558
S3600-THY_vs_S3600-LIVER-resent	chr1	70229328	70229328	C	A	Spag16	c.1095-35578C>A	intron_variant	MODIFIER	transcript	80	0	0	127	53	0.431	SNP	5.92991
S3600-THY_vs_S3600-LIVER-resent	chr1	70486168	70486168	C	G	Spag16	c.1618-7613C>G	intron_variant	MODIFIER	transcript	67	0	0	104	39	0.379	SNP	5.82221
S3600-THY_vs_S3600-LIVER-resent	chr1	70659258	70659258	C	G	Spag16	c.1745-65509C>G	intron_variant	MODIFIER	transcript	53	0	0	111	49	0.44	SNP	6.0016
S3600-THY_vs_S3600-LIVER-resent	chr1	70683864	70683864	G	T	Spag16	c.1745-40903G>T	intron_variant	MODIFIER	transcript	43	1	0.024	65	15	0.231	SNP	2.65225
S3600-THY_vs_S3600-LIVER-resent	chr1	70750692	70750692	C	G	Vwc2l	c.391-245C>G	intron_variant	MODIFIER	transcript	84	1	0.012	118	59	0.504	SNP	6.07785
S3600-THY_vs_S3600-LIVER-resent	chr1	70960009	70960009	C	G	Vwc2l-Bard1	n.70960009C>G	intergenic_region	MODIFIER	intergenic_region	59	0	0	110	57	0.514	SNP	5.96704
S3600-THY_vs_S3600-LIVER-resent	chr1	71024780	71024780	C	T	Bard1	c.*5740G>A	downstream_gene_variant	MODIFIER	transcript	75	0	0	118	60	0.504	SNP	5.9695
S3600-THY_vs_S3600-LIVER-resent	chr1	71038384	71038384	G	C	Bard1	c.1868-6928C>G	intron_variant	MODIFIER	transcript	64	0	0	88	20	0.218	SNP	5.0268
S3600-THY_vs_S3600-LIVER-resent	chr1	71055411	71055411	C	G	Bard1	c.1533-1690G>C	intron_variant	MODIFIER	transcript	94	0	0	98	50	0.51	SNP	6.38037
S3600-THY_vs_S3600-LIVER-resent	chr1	71297851	71297851	C	G	Abca12	c.3286-2795G>C	intron_variant	MODIFIER	transcript	77	1	0.013	98	50	0.515	SNP	5.77503
S3600-THY_vs_S3600-LIVER-resent	chr1	71497777	71497777	C	G	Abca12-Atic	n.71497777C>G	intergenic_region	MODIFIER	intergenic_region	65	0	0	110	52	0.468	SNP	6.01861
S3600-THY_vs_S3600-LIVER-resent	chr1	71514596	71514596	C	G	Abca12-Atic	n.71514596C>G	intergenic_region	MODIFIER	intergenic_region	73	0	0	102	38	0.366	SNP	6.2506
S3600-THY_vs_S3600-LIVER-resent	chr1	71541935	71541935	C	T	Abca12-Atic	n.71541935C>T	intergenic_region	MODIFIER	intergenic_region	66	0	0	93	42	0.452	SNP	5.95024
S3600-THY_vs_S3600-LIVER-resent	chr1	71564898	71564898	C	G	Atic	c.619C>G	missense_variant	MODERATE	transcript	81	0	0	102	59	0.584	SNP	5.90404
S3600-THY_vs_S3600-LIVER-resent	chr1	71591737	71591737	C	G	Fn1	c.7016-845G>C	intron_variant	MODIFIER	transcript	74	0	0	117	52	0.444	SNP	5.76616
S3600-THY_vs_S3600-LIVER-resent	chr1	71643228	71643228	C	G	Fn1	c.845-77G>C	intron_variant	MODIFIER	transcript	75	1	0.014	117	57	0.491	SNP	5.72381
S3600-THY_vs_S3600-LIVER-resent	chr1	71775299	71775299	G	T	Apol7d-Gm8883	n.71775299G>T	intergenic_region	MODIFIER	intergenic_region	68	0	0	95	51	0.537	SNP	6.03129
S3600-THY_vs_S3600-LIVER-resent	chr1	71775300	71775300	C	T	Apol7d-Gm8883	n.71775300C>T	intergenic_region	MODIFIER	intergenic_region	68	0	0	94	51	0.537	SNP	6.02112
S3600-THY_vs_S3600-LIVER-resent	chr1	71800392	71800392	C	G	Apol7d-Gm8883	n.71800392C>G	intergenic_region	MODIFIER	intergenic_region	54	0	0	72	39	0.535	SNP	6.29243
S3600-THY_vs_S3600-LIVER-resent	chr1	71915494	71915494	C	G	Gm8883-4933417E11Rik	n.71915494C>G	intergenic_region	MODIFIER	intergenic_region	75	0	0	123	53	0.431	SNP	5.67749
S3600-THY_vs_S3600-LIVER-resent	chr1	71926352	71926352	C	A	Gm8883-4933417E11Rik	n.71926352C>A	intergenic_region	MODIFIER	intergenic_region	37	0	0	57	28	0.491	SNP	5.86162
S3600-THY_vs_S3600-LIVER-resent	chr1	71979204	71979204	C	G	4933417E11Rik	n.185-15412G>C	intron_variant	MODIFIER	transcript	57	0	0	103	54	0.524	SNP	6.26203
S3600-THY_vs_S3600-LIVER-resent	chr1	71995249	71995249	C	G	4933417E11Rik	n.184+9763G>C	intron_variant	MODIFIER	transcript	76	0	0	115	59	0.504	SNP	5.96636
S3600-THY_vs_S3600-LIVER-resent	chr1	71995782	71995782	C	G	4933417E11Rik	n.184+9230G>C	intron_variant	MODIFIER	transcript	78	0	0	100	52	0.515	SNP	6.0755
S3600-THY_vs_S3600-LIVER-resent	chr1	72075863	72075863	C	T	4933417E11Rik-Mreg	n.72075863C>T	intergenic_region	MODIFIER	intergenic_region	72	1	0.014	109	53	0.491	SNP	6.04656
S3600-THY_vs_S3600-LIVER-resent	chr1	72082310	72082310	C	G	4933417E11Rik-Mreg	n.72082310C>G	intergenic_region	MODIFIER	intergenic_region	59	0	0	116	56	0.483	SNP	6.05568
S3600-THY_vs_S3600-LIVER-resent	chr1	72109404	72109404	C	G	4933417E11Rik-Mreg	n.72109404C>G	intergenic_region	MODIFIER	intergenic_region	75	0	0	120	63	0.517	SNP	5.81815
S3600-THY_vs_S3600-LIVER-resent	chr1	72285997	72286001	TTGTG	T	Pecr	c.-1785_-1782delCACA	upstream_gene_variant	MODIFIER	transcript	49	1	0.021	77	37	0.474	DELETION.NumRepetitions_10orMore.EventLength_2.RepeatExpansion_TG	5.99662
S3600-THY_vs_S3600-LIVER-resent	chr1	72377972	72377972	C	G	Xrcc5	c.1838-3647C>G	intron_variant	MODIFIER	transcript	74	0	0	101	57	0.556	SNP	5.79667
S3600-THY_vs_S3600-LIVER-resent	chr1	72383790	72383790	C	G	Xrcc5	c.2112+21C>G	intron_variant	MODIFIER	transcript	78	1	0.013	122	61	0.5	SNP	5.77791
S3600-THY_vs_S3600-LIVER-resent	chr1	72405837	72405837	C	G	Xrcc5-March4	n.72405837C>G	intergenic_region	MODIFIER	intergenic_region	67	0	0	110	48	0.431	SNP	6.29168
S3600-THY_vs_S3600-LIVER-resent	chr1	72511410	72511410	C	G	2021-03-04	c.513+23215G>C	intron_variant	MODIFIER	transcript	57	0	0	87	39	0.453	SNP	6.13729
S3600-THY_vs_S3600-LIVER-resent	chr1	72519720	72519720	C	G	2021-03-04	c.513+14905G>C	intron_variant	MODIFIER	transcript	70	0	0	122	51	0.412	SNP	5.86613
S3600-THY_vs_S3600-LIVER-resent	chr1	72532160	72532160	C	T	2021-03-04	c.513+2465G>A	intron_variant	MODIFIER	transcript	58	0	0	99	47	0.475	SNP	6.26117
S3600-THY_vs_S3600-LIVER-resent	chr1	72631545	72631545	C	G	Smarcal1	c.2500-1276C>G	intron_variant	MODIFIER	transcript	68	0	0	92	45	0.489	SNP	5.98455
S3600-THY_vs_S3600-LIVER-resent	chr1	72688609	72688609	C	G	Ankar	c.1144G>C	missense_variant	MODERATE	transcript	64	0	0	107	51	0.471	SNP	6.1639
S3600-THY_vs_S3600-LIVER-resent	chr1	72694706	72694706	C	G	Ankar	c.601+3715G>C	intron_variant	MODIFIER	transcript	61	0	0	110	51	0.464	SNP	6.27823
S3600-THY_vs_S3600-LIVER-resent	chr1	72736219	72736219	C	G	Rpl37a-Igfbp2	n.72736219C>G	intergenic_region	MODIFIER	intergenic_region	83	1	0.012	115	58	0.509	SNP	6.20057
S3600-THY_vs_S3600-LIVER-resent	chr1	72743130	72743130	C	G	Rpl37a-Igfbp2	n.72743130C>G	intergenic_region	MODIFIER	intergenic_region	68	0	0	128	58	0.453	SNP	5.88014
S3600-THY_vs_S3600-LIVER-resent	chr1	72743226	72743226	C	G	Rpl37a-Igfbp2	n.72743226C>G	intergenic_region	MODIFIER	intergenic_region	67	0	0	116	56	0.482	SNP	6.11421
S3600-THY_vs_S3600-LIVER-resent	chr1	72787171	72787171	C	G	Rpl37a-Igfbp2	n.72787171C>G	intergenic_region	MODIFIER	intergenic_region	62	0	0	131	70	0.531	SNP	5.96408
S3600-THY_vs_S3600-LIVER-resent	chr1	72985634	72985634	C	G	Igfbp5-Tnp1	n.72985634C>G	intergenic_region	MODIFIER	intergenic_region	80	0	0	109	52	0.481	SNP	5.9527
S3600-THY_vs_S3600-LIVER-resent	chr1	73130324	73130324	C	G	1700027A15Rik-Pinc	n.73130324C>G	intergenic_region	MODIFIER	intergenic_region	73	0	0	121	59	0.487	SNP	6.10171
S3600-THY_vs_S3600-LIVER-resent	chr1	73184789	73184789	C	G	1700027A15Rik-Pinc	n.73184789C>G	intergenic_region	MODIFIER	intergenic_region	66	0	0	109	56	0.523	SNP	5.75579
S3600-THY_vs_S3600-LIVER-resent	chr1	73202912	73202913	GA	G	1700027A15Rik-Pinc	n.73202913delA	intergenic_region	MODIFIER	intergenic_region	60	0	0	96	52	0.553	DELETION.NumRepetitions_10orMore.EventLength_1.RepeatExpansion_A	6.23498
S3600-THY_vs_S3600-LIVER-resent	chr1	73221125	73221125	A	AAAAG	1700027A15Rik-Pinc	n.73221125_73221126insAAAG	intergenic_region	MODIFIER	intergenic_region	8	0	0	19	19	1	INSERTION.NumRepetitions_10orMore.EventLength_4	6.34637
S3600-THY_vs_S3600-LIVER-resent	chr1	73391439	73391439	C	G	Pinc	n.1506G>C	non_coding_transcript_exon_variant	MODIFIER	transcript	77	0	0	103	46	0.447	SNP	5.76697
S3600-THY_vs_S3600-LIVER-resent	chr1	73453720	73453720	C	G	D530049I02Rik-6030407O03Rik	n.73453720C>G	intergenic_region	MODIFIER	intergenic_region	67	0	0	112	52	0.464	SNP	5.89232
S3600-THY_vs_S3600-LIVER-resent	chr1	73503297	73503297	C	G	D530049I02Rik-6030407O03Rik	n.73503297C>G	intergenic_region	MODIFIER	intergenic_region	54	0	0	102	60	0.584	SNP	5.72877
S3600-THY_vs_S3600-LIVER-resent	chr1	73516435	73516435	C	G	D530049I02Rik-6030407O03Rik	n.73516435C>G	intergenic_region	MODIFIER	intergenic_region	56	1	0.018	127	61	0.484	SNP	5.9438
S3600-THY_vs_S3600-LIVER-resent	chr1	73522998	73522998	C	G	D530049I02Rik-6030407O03Rik	n.73522998C>G	intergenic_region	MODIFIER	intergenic_region	55	0	0	100	46	0.465	SNP	6.00543
S3600-THY_vs_S3600-LIVER-resent	chr1	73524719	73524719	C	G	D530049I02Rik-6030407O03Rik	n.73524719C>G	intergenic_region	MODIFIER	intergenic_region	62	0	0	87	39	0.448	SNP	6.45814
S3600-THY_vs_S3600-LIVER-resent	chr1	73586341	73586341	G	A	D530049I02Rik-6030407O03Rik	n.73586341G>A	intergenic_region	MODIFIER	intergenic_region	58	1	0.017	96	47	0.49	SNP	5.76817
S3600-THY_vs_S3600-LIVER-resent	chr1	73646111	73646111	C	A	6030407O03Rik	n.1287-25687G>T	intron_variant	MODIFIER	transcript	59	0	0	111	45	0.394	SNP	5.96011
S3600-THY_vs_S3600-LIVER-resent	chr1	73668263	73668263	C	G	6030407O03Rik	n.1286+4733G>C	intron_variant	MODIFIER	transcript	40	0	0	80	40	0.5	SNP	5.98193
S3600-THY_vs_S3600-LIVER-resent	chr1	74192413	74192413	G	C	Cxcr1	c.449C>G	missense_variant	MODERATE	transcript	68	0	0	108	52	0.481	SNP	5.94101
S3600-THY_vs_S3600-LIVER-resent	chr1	74214358	74214358	G	C	Mir1928-Arpc2	n.74214358G>C	intergenic_region	MODIFIER	intergenic_region	69	0	0	109	50	0.454	SNP	6.00906
S3600-THY_vs_S3600-LIVER-resent	chr1	74381587	74381587	G	C	Slc11a1	c.787-149G>C	intron_variant	MODIFIER	transcript	80	0	0	95	48	0.505	SNP	5.85931
S3600-THY_vs_S3600-LIVER-resent	chr1	74461599	74461599	G	C	Usp37	c.1802C>G	missense_variant	MODERATE	transcript	82	0	0	107	35	0.333	SNP	6.59812
S3600-THY_vs_S3600-LIVER-resent	chr1	74706563	74706563	G	C	Ttll4-Cyp27a1	n.74706563G>C	intergenic_region	MODIFIER	intergenic_region	62	0	0	123	61	0.492	SNP	6.0491
S3600-THY_vs_S3600-LIVER-resent	chr1	75229556	75229556	G	C	A630095N17Rik	c.100+2419C>G	intron_variant	MODIFIER	transcript	98	0	0	106	49	0.457	SNP	5.8756
S3600-THY_vs_S3600-LIVER-resent	chr1	75559476	75559476	C	G	Slc4a3	c.*586C>G	downstream_gene_variant	MODIFIER	transcript	71	0	0	101	43	0.426	SNP	6.19893
S3600-THY_vs_S3600-LIVER-resent	chr1	75603080	75603080	C	A	Slc4a3-Gm17751	n.75603080C>A	intergenic_region	MODIFIER	intergenic_region	104	1	0.009615	131	64	0.492	SNP	6.09098
S3600-THY_vs_S3600-LIVER-resent	chr1	75609662	75609662	C	T	Slc4a3-Gm17751	n.75609662C>T	intergenic_region	MODIFIER	intergenic_region	84	0	0	130	65	0.5	SNP	5.78934
S3600-THY_vs_S3600-LIVER-resent	chr1	75620370	75620370	C	G	Slc4a3-Gm17751	n.75620370C>G	intergenic_region	MODIFIER	intergenic_region	52	0	0	109	54	0.495	SNP	6.14457
S3600-THY_vs_S3600-LIVER-resent	chr1	75631835	75631835	C	G	Slc4a3-Gm17751	n.75631835C>G	intergenic_region	MODIFIER	intergenic_region	47	0	0	78	35	0.449	SNP	5.91196
S3600-THY_vs_S3600-LIVER-resent	chr1	75644354	75644354	C	G	Slc4a3-Gm17751	n.75644354C>G	intergenic_region	MODIFIER	intergenic_region	77	1	0.013	108	50	0.458	SNP	5.75803
S3600-THY_vs_S3600-LIVER-resent	chr1	75650170	75650170	C	G	Slc4a3-Gm17751	n.75650170C>G	intergenic_region	MODIFIER	intergenic_region	68	0	0	109	52	0.472	SNP	5.92646
S3600-THY_vs_S3600-LIVER-resent	chr1	75656374	75656374	C	G	Slc4a3-Gm17751	n.75656374C>G	intergenic_region	MODIFIER	intergenic_region	74	0	0	99	48	0.485	SNP	6.02402
S3600-THY_vs_S3600-LIVER-resent	chr1	75668035	75668035	C	G	Slc4a3-Gm17751	n.75668035C>G	intergenic_region	MODIFIER	intergenic_region	82	1	0.013	121	69	0.571	SNP	5.99971
S3600-THY_vs_S3600-LIVER-resent	chr1	75668217	75668217	C	G	Slc4a3-Gm17751	n.75668217C>G	intergenic_region	MODIFIER	intergenic_region	69	1	0.015	102	52	0.51	SNP	5.82921
S3600-THY_vs_S3600-LIVER-resent	chr1	75788159	75788159	C	G	Slc4a3-Gm17751	n.75788159C>G	intergenic_region	MODIFIER	intergenic_region	73	1	0.014	124	59	0.476	SNP	6.03815
S3600-THY_vs_S3600-LIVER-resent	chr1	75794696	75794696	C	G	Slc4a3-Gm17751	n.75794696C>G	intergenic_region	MODIFIER	intergenic_region	85	0	0	134	71	0.527	SNP	5.77878
S3600-THY_vs_S3600-LIVER-resent	chr1	75914831	75914831	C	G	Slc4a3-Gm17751	n.75914831C>G	intergenic_region	MODIFIER	intergenic_region	78	0	0	94	41	0.44	SNP	6.24302
S3600-THY_vs_S3600-LIVER-resent	chr1	76020308	76020308	C	G	Slc4a3-Gm17751	n.76020308C>G	intergenic_region	MODIFIER	intergenic_region	57	0	0	102	45	0.446	SNP	6.06577
S3600-THY_vs_S3600-LIVER-resent	chr1	76104168	76104168	C	G	Slc4a3-Gm17751	n.76104168C>G	intergenic_region	MODIFIER	intergenic_region	89	0	0	101	58	0.574	SNP	5.81212
S3600-THY_vs_S3600-LIVER-resent	chr1	76173190	76173190	C	G	Slc4a3-Gm17751	n.76173190C>G	intergenic_region	MODIFIER	intergenic_region	63	0	0	100	57	0.57	SNP	5.80525
S3600-THY_vs_S3600-LIVER-resent	chr1	76217579	76217579	C	G	Slc4a3-Gm17751	n.76217579C>G	intergenic_region	MODIFIER	intergenic_region	53	1	0.019	84	37	0.439	SNP	6.42593
S3600-THY_vs_S3600-LIVER-resent	chr1	76218137	76218137	C	G	Slc4a3-Gm17751	n.76218137C>G	intergenic_region	MODIFIER	intergenic_region	68	0	0	94	38	0.409	SNP	5.87197
S3600-THY_vs_S3600-LIVER-resent	chr1	76340994	76340994	C	G	Slc4a3-Gm17751	n.76340994C>G	intergenic_region	MODIFIER	intergenic_region	68	1	0.015	98	40	0.421	SNP	5.96017
S3600-THY_vs_S3600-LIVER-resent	chr1	76412106	76412106	C	G	Slc4a3-Gm17751	n.76412106C>G	intergenic_region	MODIFIER	intergenic_region	79	0	0	105	49	0.461	SNP	5.84097
S3600-THY_vs_S3600-LIVER-resent	chr1	76595730	76595730	G	GTATATA	Mir6343-Epha4	n.76595730_76595731insTATATA	intergenic_region	MODIFIER	intergenic_region	8	0	0	9	8	0.909	INSERTION.NumRepetitions_10orMore.EventLength_2.RepeatExpansion_TA	3.38578
S3600-THY_vs_S3600-LIVER-resent	chr1	76801400	76801400	C	G	Mir6343-Epha4	n.76801400C>G	intergenic_region	MODIFIER	intergenic_region	69	0	0	116	58	0.496	SNP	5.91916
S3600-THY_vs_S3600-LIVER-resent	chr1	76938166	76938166	C	G	Mir6343-Epha4	n.76938166C>G	intergenic_region	MODIFIER	intergenic_region	80	0	0	113	51	0.451	SNP	5.68268
S3600-THY_vs_S3600-LIVER-resent	chr1	77132469	77132469	C	G	Mir6343-Epha4	n.77132469C>G	intergenic_region	MODIFIER	intergenic_region	86	0	0	122	56	0.463	SNP	5.94373
S3600-THY_vs_S3600-LIVER-resent	chr1	77136664	77136664	C	G	Mir6343-Epha4	n.77136664C>G	intergenic_region	MODIFIER	intergenic_region	68	0	0	92	52	0.567	SNP	5.95265
S3600-THY_vs_S3600-LIVER-resent	chr1	77188392	77188392	C	G	Mir6343-Epha4	n.77188392C>G	intergenic_region	MODIFIER	intergenic_region	74	0	0	112	50	0.45	SNP	5.86978
S3600-THY_vs_S3600-LIVER-resent	chr1	77278982	77278982	C	T	Mir6343-Epha4	n.77278982C>T	intergenic_region	MODIFIER	intergenic_region	79	0	0	118	52	0.448	SNP	5.99354
S3600-THY_vs_S3600-LIVER-resent	chr1	77447329	77447329	C	G	Epha4	c.824-2309G>C	intron_variant	MODIFIER	transcript	67	0	0	78	48	0.618	SNP	5.92367
S3600-THY_vs_S3600-LIVER-resent	chr1	77488121	77488121	C	G	Epha4	c.823+18427G>C	intron_variant	MODIFIER	transcript	91	0	0	114	50	0.439	SNP	5.83973
S3600-THY_vs_S3600-LIVER-resent	chr1	77528982	77528982	C	G	Epha4-Pax3	n.77528982C>G	intergenic_region	MODIFIER	intergenic_region	58	1	0.017	89	47	0.528	SNP	6.16101
S3600-THY_vs_S3600-LIVER-resent	chr1	77610634	77610634	C	G	Epha4-Pax3	n.77610634C>G	intergenic_region	MODIFIER	intergenic_region	24	0	0	53	20	0.377	SNP	3.76776
S3600-THY_vs_S3600-LIVER-resent	chr1	77981660	77981660	C	T	Epha4-Pax3	n.77981660C>T	intergenic_region	MODIFIER	intergenic_region	53	1	0.019	79	37	0.468	SNP	5.93179
S3600-THY_vs_S3600-LIVER-resent	chr1	78053695	78053695	C	G	Epha4-Pax3	n.78053695C>G	intergenic_region	MODIFIER	intergenic_region	72	0	0	111	53	0.482	SNP	6.11262
S3600-THY_vs_S3600-LIVER-resent	chr1	78092148	78092148	C	A	Epha4-Pax3	n.78092148C>A	intergenic_region	MODIFIER	intergenic_region	65	0	0	91	38	0.418	SNP	5.99041
S3600-THY_vs_S3600-LIVER-resent	chr1	78143402	78143402	C	G	Pax3	c.587-10969G>C	intron_variant	MODIFIER	transcript	58	0	0	99	43	0.439	SNP	6.19943
S3600-THY_vs_S3600-LIVER-resent	chr1	78151168	78151168	C	T	Pax3	c.587-18735G>A	intron_variant	MODIFIER	transcript	73	0	0	98	43	0.433	SNP	6.05776
S3600-THY_vs_S3600-LIVER-resent	chr1	78198476	78198477	AG	A	Pax3	c.-1728delC	upstream_gene_variant	MODIFIER	transcript	30	0	0	48	17	0.354	DELETION.NumRepetitions_10orMore.EventLength_1.RepeatExpansion_G	3.95597
S3600-THY_vs_S3600-LIVER-resent	chr1	78221427	78221427	C	A	Pax3-Sgpp2	n.78221427C>A	intergenic_region	MODIFIER	intergenic_region	74	1	0.014	110	51	0.459	SNP	6.11303
S3600-THY_vs_S3600-LIVER-resent	chr1	78249091	78249091	C	G	Pax3-Sgpp2	n.78249091C>G	intergenic_region	MODIFIER	intergenic_region	58	0	0	80	33	0.41	SNP	5.85044
S3600-THY_vs_S3600-LIVER-resent	chr1	78311948	78311948	C	G	Sgpp2	c.84+1446C>G	intron_variant	MODIFIER	transcript	80	0	0	100	48	0.48	SNP	5.94696
S3600-THY_vs_S3600-LIVER-resent	chr1	78315378	78315378	C	G	Sgpp2	c.84+4876C>G	intron_variant	MODIFIER	transcript	68	0	0	97	47	0.473	SNP	5.83138
S3600-THY_vs_S3600-LIVER-resent	chr1	78318045	78318045	C	G	Sgpp2	c.84+7543C>G	intron_variant	MODIFIER	transcript	74	1	0.014	94	54	0.576	SNP	5.91907
S3600-THY_vs_S3600-LIVER-resent	chr1	78337693	78337693	C	T	Sgpp2	c.85-22378C>T	intron_variant	MODIFIER	transcript	61	0	0	111	63	0.573	SNP	5.92658
S3600-THY_vs_S3600-LIVER-resent	chr1	78346753	78346753	C	G	Sgpp2	c.85-13318C>G	intron_variant	MODIFIER	transcript	51	1	0.02	99	45	0.455	SNP	5.8277
S3600-THY_vs_S3600-LIVER-resent	chr1	78361906	78361906	C	G	Sgpp2	c.243+1677C>G	intron_variant	MODIFIER	transcript	97	0	0	89	40	0.455	SNP	6.18029
S3600-THY_vs_S3600-LIVER-resent	chr1	78392281	78392281	C	G	Sgpp2	c.424-1078C>G	intron_variant	MODIFIER	transcript	78	1	0.013	123	60	0.475	SNP	6.20314
S3600-THY_vs_S3600-LIVER-resent	chr1	78540177	78540177	C	G	Mogat1	c.*2079C>G	downstream_gene_variant	MODIFIER	transcript	69	1	0.014	115	48	0.425	SNP	6.07533
S3600-THY_vs_S3600-LIVER-resent	chr1	78549220	78549220	C	G	Mogat1-Utp14b	n.78549220C>G	intergenic_region	MODIFIER	intergenic_region	64	0	0	111	57	0.514	SNP	6.14015
S3600-THY_vs_S3600-LIVER-resent	chr1	78574848	78574848	C	G	Mogat1-Utp14b	n.78574848C>G	intergenic_region	MODIFIER	intergenic_region	50	0	0	105	57	0.538	SNP	6.0613
S3600-THY_vs_S3600-LIVER-resent	chr1	78595335	78595335	A	T	Mogat1-Utp14b	n.78595335A>T	intergenic_region	MODIFIER	intergenic_region	57	0	0	104	46	0.436	SNP	5.93666
S3600-THY_vs_S3600-LIVER-resent	chr1	78665933	78665933	C	G	Utp14b	c.1547C>G	missense_variant	MODERATE	transcript	64	0	0	108	57	0.533	SNP	5.77844
S3600-THY_vs_S3600-LIVER-resent	chr1	78860695	78860695	C	G	Kcne4-Scg2	n.78860695C>G	intergenic_region	MODIFIER	intergenic_region	65	0	0	106	46	0.429	SNP	6.11111
S3600-THY_vs_S3600-LIVER-resent	chr1	78926433	78926433	C	G	Kcne4-Scg2	n.78926433C>G	intergenic_region	MODIFIER	intergenic_region	59	0	0	105	36	0.346	SNP	6.09597
S3600-THY_vs_S3600-LIVER-resent	chr1	78933382	78933382	C	G	Kcne4-Scg2	n.78933382C>G	intergenic_region	MODIFIER	intergenic_region	46	0	0	102	55	0.539	SNP	6.05625
S3600-THY_vs_S3600-LIVER-resent	chr1	78959107	78959111	AAGAG	A	Kcne4-Scg2	n.78959108_78959111delAGAG	intergenic_region	MODIFIER	intergenic_region	29	0	0	54	19	0.352	DELETION.NumRepetitions_10orMore.EventLength_2.RepeatExpansion_AG	4.0855
S3600-THY_vs_S3600-LIVER-resent	chr1	79141517	79141517	C	A	Kcne4-Scg2	n.79141517C>A	intergenic_region	MODIFIER	intergenic_region	65	0	0	97	48	0.49	SNP	6.3494
S3600-THY_vs_S3600-LIVER-resent	chr1	79312960	79312960	C	T	Kcne4-Scg2	n.79312960C>T	intergenic_region	MODIFIER	intergenic_region	65	0	0	98	49	0.505	SNP	5.83606
S3600-THY_vs_S3600-LIVER-resent	chr1	79366985	79366985	C	G	Kcne4-Scg2	n.79366985C>G	intergenic_region	MODIFIER	intergenic_region	61	0	0	106	43	0.406	SNP	6.06061
S3600-THY_vs_S3600-LIVER-resent	chr1	79394118	79394118	G	C	Kcne4-Scg2	n.79394118G>C	intergenic_region	MODIFIER	intergenic_region	43	0	0	106	52	0.481	SNP	6.51171
S3600-THY_vs_S3600-LIVER-resent	chr1	79539688	79539688	C	G	Scg2-Ap1s3	n.79539688C>G	intergenic_region	MODIFIER	intergenic_region	67	0	0	124	51	0.407	SNP	6.1083
S3600-THY_vs_S3600-LIVER-resent	chr1	79557441	79557441	C	G	Scg2-Ap1s3	n.79557441C>G	intergenic_region	MODIFIER	intergenic_region	59	0	0	93	45	0.478	SNP	5.88003
S3600-THY_vs_S3600-LIVER-resent	chr1	79557868	79557868	C	G	Scg2-Ap1s3	n.79557868C>G	intergenic_region	MODIFIER	intergenic_region	73	0	0	111	65	0.583	SNP	6.18428
S3600-THY_vs_S3600-LIVER-resent	chr1	79575273	79575273	C	G	Scg2-Ap1s3	n.79575273C>G	intergenic_region	MODIFIER	intergenic_region	56	1	0.018	106	57	0.529	SNP	6.09768
S3600-THY_vs_S3600-LIVER-resent	chr1	79587422	79587422	C	G	Scg2-Ap1s3	n.79587422C>G	intergenic_region	MODIFIER	intergenic_region	54	0	0	101	48	0.47	SNP	5.88781
S3600-THY_vs_S3600-LIVER-resent	chr1	79589637	79589637	C	G	Scg2-Ap1s3	n.79589637C>G	intergenic_region	MODIFIER	intergenic_region	69	0	0	106	55	0.514	SNP	6.10767
S3600-THY_vs_S3600-LIVER-resent	chr1	79655154	79655154	C	G	Ap1s3	c.3+16696G>C	intron_variant	MODIFIER	transcript	65	1	0.015	98	48	0.489	SNP	5.83606
S3600-THY_vs_S3600-LIVER-resent	chr1	79837776	79837776	C	G	Serpine2	c.-22-16219G>C	intron_variant	MODIFIER	transcript	63	1	0.016	110	55	0.505	SNP	5.83253
S3600-THY_vs_S3600-LIVER-resent	chr1	79860534	79860534	C	G	Serpine2	c.-38999G>C	upstream_gene_variant	MODIFIER	transcript	69	0	0	90	39	0.433	SNP	6.18112
S3600-THY_vs_S3600-LIVER-resent	chr1	79937104	79937104	C	G	Serpine2-Fam124b	n.79937104C>G	intergenic_region	MODIFIER	intergenic_region	66	0	0	98	50	0.505	SNP	6.15781
S3600-THY_vs_S3600-LIVER-resent	chr1	79993893	79993893	T	G	Serpine2-Fam124b	n.79993893T>G	intergenic_region	MODIFIER	intergenic_region	62	0	0	103	45	0.431	SNP	5.85032
S3600-THY_vs_S3600-LIVER-resent	chr1	80079551	80079551	A	AATAG	Serpine2-Fam124b	n.80079551_80079552insATAG	intergenic_region	MODIFIER	intergenic_region	36	0	0	63	17	0.27	INSERTION.NumRepetitions_10orMore.EventLength_4	3.67184
S3600-THY_vs_S3600-LIVER-resent	chr1	80365126	80365126	C	G	Cul3-1700016L21Rik	n.80365126C>G	intergenic_region	MODIFIER	intergenic_region	70	0	0	112	33	0.294	SNP	6.21783
S3600-THY_vs_S3600-LIVER-resent	chr1	80372161	80372161	G	C	Cul3-1700016L21Rik	n.80372161G>C	intergenic_region	MODIFIER	intergenic_region	57	0	0	99	30	0.306	SNP	6.03796
S3600-THY_vs_S3600-LIVER-resent	chr1	80392145	80392145	G	C	Cul3-1700016L21Rik	n.80392145G>C	intergenic_region	MODIFIER	intergenic_region	61	0	0	118	33	0.284	SNP	6.13902
S3600-THY_vs_S3600-LIVER-resent	chr1	80706894	80706894	G	C	Dock10	c.123+51432C>G	intron_variant	MODIFIER	transcript	61	0	0	108	22	0.206	SNP	4.59155
S3600-THY_vs_S3600-LIVER-resent	chr1	80907556	80907556	G	C	Dock10-Nyap2	n.80907556G>C	intergenic_region	MODIFIER	intergenic_region	80	0	0	117	58	0.496	SNP	5.8903
S3600-THY_vs_S3600-LIVER-resent	chr1	80914847	80914847	C	T	Dock10-Nyap2	n.80914847C>T	intergenic_region	MODIFIER	intergenic_region	68	0	0	134	68	0.507	SNP	5.81648
S3600-THY_vs_S3600-LIVER-resent	chr1	81088037	81088037	C	G	Nyap2	c.221+544C>G	intron_variant	MODIFIER	transcript	74	0	0	118	52	0.448	SNP	5.76474
S3600-THY_vs_S3600-LIVER-resent	chr1	81207444	81207444	C	G	Nyap2	c.619+15296C>G	intron_variant	MODIFIER	transcript	66	0	0	103	48	0.461	SNP	5.88955
S3600-THY_vs_S3600-LIVER-resent	chr1	81215952	81215952	C	G	Nyap2	c.619+23804C>G	intron_variant	MODIFIER	transcript	88	0	0	118	53	0.449	SNP	5.74338
S3600-THY_vs_S3600-LIVER-resent	chr1	81216044	81216044	C	G	Nyap2	c.619+23896C>G	intron_variant	MODIFIER	transcript	84	0	0	105	52	0.5	SNP	5.87365
S3600-THY_vs_S3600-LIVER-resent	chr1	81225071	81225071	C	G	Nyap2	c.620-15813C>G	intron_variant	MODIFIER	transcript	75	0	0	120	57	0.47	SNP	6.14335
S3600-THY_vs_S3600-LIVER-resent	chr1	81266029	81266029	C	G	Nyap2	c.1706-3015C>G	intron_variant	MODIFIER	transcript	59	0	0	99	54	0.545	SNP	6.17595
S3600-THY_vs_S3600-LIVER-resent	chr1	81267622	81267622	C	G	Nyap2	c.1706-1422C>G	intron_variant	MODIFIER	transcript	73	1	0.014	118	51	0.432	SNP	5.76247
S3600-THY_vs_S3600-LIVER-resent	chr1	81454560	81454560	C	T	Nyap2-Mir6344	n.81454560C>T	intergenic_region	MODIFIER	intergenic_region	65	0	0	98	44	0.443	SNP	6.28351
S3600-THY_vs_S3600-LIVER-resent	chr1	81516766	81516766	C	G	Nyap2-Mir6344	n.81516766C>G	intergenic_region	MODIFIER	intergenic_region	54	0	0	118	60	0.508	SNP	6.10657
S3600-THY_vs_S3600-LIVER-resent	chr1	81620598	81620598	G	A	Nyap2-Mir6344	n.81620598G>A	intergenic_region	MODIFIER	intergenic_region	78	1	0.013	105	46	0.438	SNP	6.04228
S3600-THY_vs_S3600-LIVER-resent	chr1	81652430	81652430	C	G	Nyap2-Mir6344	n.81652430C>G	intergenic_region	MODIFIER	intergenic_region	72	0	0	103	60	0.588	SNP	5.73728
S3600-THY_vs_S3600-LIVER-resent	chr1	81686845	81686845	C	G	Nyap2-Mir6344	n.81686845C>G	intergenic_region	MODIFIER	intergenic_region	59	1	0.017	89	38	0.427	SNP	6.08928
S3600-THY_vs_S3600-LIVER-resent	chr1	82137721	82137721	C	G	Mir6344-Irs1	n.82137721C>G	intergenic_region	MODIFIER	intergenic_region	83	0	0	129	54	0.421	SNP	6.17087
S3600-THY_vs_S3600-LIVER-resent	chr1	82207763	82207763	C	G	Mir6344-Irs1	n.82207763C>G	intergenic_region	MODIFIER	intergenic_region	79	0	0	103	42	0.408	SNP	5.69917
S3600-THY_vs_S3600-LIVER-resent	chr1	82222679	82222679	C	G	Mir6344-Irs1	n.82222679C>G	intergenic_region	MODIFIER	intergenic_region	55	0	0	113	58	0.5	SNP	6.16624
S3600-THY_vs_S3600-LIVER-resent	chr1	82237331	82237331	C	G	Irs1	c.*295G>C	3_prime_UTR_variant	MODIFIER	transcript	89	0	0	96	43	0.442	SNP	5.84679
S3600-THY_vs_S3600-LIVER-resent	chr1	82320765	82320765	C	G	Rhbdd1	n.82320765C>G	intragenic_variant	MODIFIER	gene_variant	102	1	0.009804	132	63	0.477	SNP	6.17337
S3600-THY_vs_S3600-LIVER-resent	chr1	82348840	82348840	C	G	Rhbdd1	c.566+5978C>G	intron_variant	MODIFIER	transcript	85	0	0	107	51	0.477	SNP	5.95082
S3600-THY_vs_S3600-LIVER-resent	chr1	82355304	82355304	C	G	Rhbdd1	c.566+12442C>G	intron_variant	MODIFIER	transcript	76	0	0	90	46	0.511	SNP	5.80297
S3600-THY_vs_S3600-LIVER-resent	chr1	82361938	82361938	C	G	Rhbdd1	c.567-6354C>G	intron_variant	MODIFIER	transcript	86	0	0	104	55	0.529	SNP	5.69107
S3600-THY_vs_S3600-LIVER-resent	chr1	82410661	82410661	C	G	Rhbdd1	c.857-32202C>G	intron_variant	MODIFIER	transcript	71	0	0	122	54	0.443	SNP	6.05228
S3600-THY_vs_S3600-LIVER-resent	chr1	82416310	82416310	C	G	Rhbdd1	c.857-26553C>G	intron_variant	MODIFIER	transcript	79	0	0	118	67	0.564	SNP	5.86884
S3600-THY_vs_S3600-LIVER-resent	chr1	82430766	82430766	C	G	Rhbdd1	c.857-12097C>G	intron_variant	MODIFIER	transcript	86	0	0	118	70	0.583	SNP	5.88978
S3600-THY_vs_S3600-LIVER-resent	chr1	82616010	82616010	C	G	Col4a3	c.88-25429C>G	intron_variant	MODIFIER	transcript	42	1	0.024	72	36	0.493	SNP	6.12675
S3600-THY_vs_S3600-LIVER-resent	chr1	82679770	82679770	C	G	Col4a3	c.2482+108C>G	intron_variant	MODIFIER	transcript	87	0	0	109	50	0.463	SNP	5.91843
S3600-THY_vs_S3600-LIVER-resent	chr1	82819204	82819204	G	C	Tm4sf20-Agfg1	n.82819204G>C	intergenic_region	MODIFIER	intergenic_region	84	1	0.012	119	70	0.593	SNP	5.91157
S3600-THY_vs_S3600-LIVER-resent	chr1	83230391	83230391	C	G	Daw1-Sphkap	n.83230391C>G	intergenic_region	MODIFIER	intergenic_region	67	0	0	128	56	0.441	SNP	6.12238
S3600-THY_vs_S3600-LIVER-resent	chr1	83296611	83296611	C	G	Sphkap	c.241-5582G>C	intron_variant	MODIFIER	transcript	67	1	0.015	96	48	0.5	SNP	6.20483
S3600-THY_vs_S3600-LIVER-resent	chr1	83334252	83334252	C	G	Sphkap	c.240+5283G>C	intron_variant	MODIFIER	transcript	69	1	0.014	102	53	0.52	SNP	6.17642
S3600-THY_vs_S3600-LIVER-resent	chr1	83436145	83436146	AG	A	Sphkap-Pid1	n.83436146delG	intergenic_region	MODIFIER	intergenic_region	53	0	0	108	57	0.523	DELETION.NumRepetitions_2.EventLength_1.RepeatExpansion_G	5.89869
S3600-THY_vs_S3600-LIVER-resent	chr1	83436147	83436147	G	C	Sphkap-Pid1	n.83436147G>C	intergenic_region	MODIFIER	intergenic_region	52	0	0	107	57	0.523	SNP	5.97495
S3600-THY_vs_S3600-LIVER-resent	chr1	83500168	83500168	C	G	Sphkap-Pid1	n.83500168C>G	intergenic_region	MODIFIER	intergenic_region	51	1	0.02	90	38	0.422	SNP	5.96014
S3600-THY_vs_S3600-LIVER-resent	chr1	83845977	83845977	C	G	Sphkap-Pid1	n.83845977C>G	intergenic_region	MODIFIER	intergenic_region	65	0	0	112	54	0.477	SNP	5.86846
S3600-THY_vs_S3600-LIVER-resent	chr1	84102497	84102497	C	G	Pid1	c.177+56735G>C	intron_variant	MODIFIER	transcript	64	0	0	104	44	0.422	SNP	6.29063
S3600-THY_vs_S3600-LIVER-resent	chr1	84108329	84108329	C	G	Pid1	c.177+50903G>C	intron_variant	MODIFIER	transcript	81	0	0	118	59	0.504	SNP	5.84694
S3600-THY_vs_S3600-LIVER-resent	chr1	84119808	84119808	C	G	Pid1	c.177+39424G>C	intron_variant	MODIFIER	transcript	81	0	0	110	56	0.505	SNP	5.70253
S3600-THY_vs_S3600-LIVER-resent	chr1	84132665	84132665	C	G	Pid1	c.177+26567G>C	intron_variant	MODIFIER	transcript	71	0	0	115	54	0.47	SNP	6.10764
S3600-THY_vs_S3600-LIVER-resent	chr1	84157057	84157057	C	G	Pid1	c.177+2175G>C	intron_variant	MODIFIER	transcript	47	0	0	76	38	0.5	SNP	6.0691
S3600-THY_vs_S3600-LIVER-resent	chr1	84283840	84283840	C	G	Pid1	c.30+501G>C	intron_variant	MODIFIER	transcript	60	0	0	76	39	0.513	SNP	5.92548
S3600-THY_vs_S3600-LIVER-resent	chr1	84295221	84295221	C	G	Pid1-Dner	n.84295221C>G	intergenic_region	MODIFIER	intergenic_region	55	0	0	105	46	0.442	SNP	6.08952
S3600-THY_vs_S3600-LIVER-resent	chr1	84306465	84306465	C	G	Pid1-Dner	n.84306465C>G	intergenic_region	MODIFIER	intergenic_region	92	0	0	110	46	0.422	SNP	6.3013
S3600-THY_vs_S3600-LIVER-resent	chr1	84306785	84306785	C	G	Pid1-Dner	n.84306785C>G	intergenic_region	MODIFIER	intergenic_region	61	0	0	106	46	0.442	SNP	5.78803
S3600-THY_vs_S3600-LIVER-resent	chr1	84310716	84310716	C	G	Pid1-Dner	n.84310716C>G	intergenic_region	MODIFIER	intergenic_region	85	0	0	103	47	0.455	SNP	5.93256
S3600-THY_vs_S3600-LIVER-resent	chr1	84418254	84418254	C	G	Dner	c.1609+395G>C	intron_variant	MODIFIER	transcript	82	0	0	106	57	0.538	SNP	5.89243
S3600-THY_vs_S3600-LIVER-resent	chr1	84451691	84451691	C	G	Dner	c.1262-6072G>C	intron_variant	MODIFIER	transcript	77	0	0	131	37	0.275	SNP	5.93213
S3600-THY_vs_S3600-LIVER-resent	chr1	84470297	84470297	C	G	Dner	c.1261+6048G>C	intron_variant	MODIFIER	transcript	54	0	0	94	45	0.467	SNP	6.08495
S3600-THY_vs_S3600-LIVER-resent	chr1	84709282	84709282	A	AC	Dner-Trip12	n.84709282_84709283insC	intergenic_region	MODIFIER	intergenic_region	69	0	0	94	46	0.478	INSERTION.NumRepetitions_9.EventLength_1.RepeatExpansion_C	5.92187
S3600-THY_vs_S3600-LIVER-resent	chr1	84728846	84728846	C	G	Trip12	c.5404-557G>C	intron_variant	MODIFIER	transcript	77	0	0	98	50	0.51	SNP	6.22921
S3600-THY_vs_S3600-LIVER-resent	chr1	84828410	84828410	C	G	Trip12	c.-50+10819G>C	intron_variant	MODIFIER	transcript	63	0	0	110	53	0.472	SNP	6.03195
S3600-THY_vs_S3600-LIVER-resent	chr1	84902141	84902141	C	G	Fbxo36	c.*1956C>G	downstream_gene_variant	MODIFIER	transcript	39	0	0	93	47	0.511	SNP	6.15308
S3600-THY_vs_S3600-LIVER-resent	chr1	84936787	84936787	C	T	Slc16a14	c.-7236G>A	upstream_gene_variant	MODIFIER	transcript	69	0	0	91	43	0.467	SNP	6.23426
S3600-THY_vs_S3600-LIVER-resent	chr1	84999398	84999398	C	G	Slc16a14-A530032D15Rik	n.84999398C>G	intergenic_region	MODIFIER	intergenic_region	70	0	0	120	56	0.466	SNP	6.01145
S3600-THY_vs_S3600-LIVER-resent	chr1	85325825	85325825	C	G	C130026I21Rik-Sp110	n.85325825C>G	intergenic_region	MODIFIER	intergenic_region	101	0	0	141	38	0.273	SNP	5.88588
S3600-THY_vs_S3600-LIVER-resent	chr1	85631150	85631150	C	G	Sp140	c.829+586C>G	intron_variant	MODIFIER	transcript	87	0	0	110	29	0.269	SNP	6.08152
S3600-THY_vs_S3600-LIVER-resent	chr1	85941862	85941862	G	C	Gpr55	c.-5C>G	5_prime_UTR_variant	MODIFIER	transcript	66	0	0	96	25	0.266	SNP	6.18684
S3600-THY_vs_S3600-LIVER-resent	chr1	85950018	85950018	G	C	Gpr55	c.-8-8153C>G	intron_variant	MODIFIER	transcript	80	0	0	102	24	0.235	SNP	6.30752
S3600-THY_vs_S3600-LIVER-resent	chr1	85954187	85954187	G	C	Gpr55	c.-9+6648C>G	intron_variant	MODIFIER	transcript	66	0	0	109	35	0.324	SNP	5.93268
S3600-THY_vs_S3600-LIVER-resent	chr1	85954359	85954359	G	C	Gpr55	c.-9+6476C>G	intron_variant	MODIFIER	transcript	76	0	0	114	40	0.351	SNP	6.01803
S3600-THY_vs_S3600-LIVER-resent	chr1	85955891	85955891	G	C	Gpr55	c.-9+4944C>G	intron_variant	MODIFIER	transcript	63	0	0	130	34	0.262	SNP	6.05219
S3600-THY_vs_S3600-LIVER-resent	chr1	86049731	86049731	G	C	2810459M11Rik	c.724+1030G>C	intron_variant	MODIFIER	transcript	62	0	0	93	42	0.456	SNP	6.03925
S3600-THY_vs_S3600-LIVER-resent	chr1	86095496	86095496	G	C	Htr2b	c.*3847C>G	downstream_gene_variant	MODIFIER	transcript	71	0	0	132	33	0.25	SNP	6.47649
S3600-THY_vs_S3600-LIVER-resent	chr1	86170916	86170916	G	C	Armc9	c.600+914G>C	intron_variant	MODIFIER	transcript	69	0	0	76	36	0.474	SNP	6.16517
S3600-THY_vs_S3600-LIVER-resent	chr1	86230152	86230152	G	C	Armc9	c.1777-14414G>C	intron_variant	MODIFIER	transcript	89	0	0	130	35	0.269	SNP	5.99994
S3600-THY_vs_S3600-LIVER-resent	chr1	86230789	86230789	G	C	Armc9	c.1777-13777G>C	intron_variant	MODIFIER	transcript	72	0	0	113	27	0.243	SNP	5.75029
S3600-THY_vs_S3600-LIVER-resent	chr1	86234981	86234981	G	C	Armc9	c.1777-9585G>C	intron_variant	MODIFIER	transcript	99	0	0	113	28	0.248	SNP	6.10542
S3600-THY_vs_S3600-LIVER-resent	chr1	86243363	86243363	G	C	Armc9	c.1777-1203G>C	intron_variant	MODIFIER	transcript	77	0	0	91	25	0.281	SNP	6.54402
S3600-THY_vs_S3600-LIVER-resent	chr1	86245151	86245151	G	T	Armc9	c.1881+481G>T	intron_variant	MODIFIER	transcript	83	1	0.012	124	59	0.475	SNP	5.74483
S3600-THY_vs_S3600-LIVER-resent	chr1	86266887	86266887	G	C	Armc9	c.2261+4722G>C	intron_variant	MODIFIER	transcript	104	0	0	130	63	0.484	SNP	5.82078
S3600-THY_vs_S3600-LIVER-resent	chr1	86401379	86401379	G	C	Nmur1-1700019O17Rik	n.86401379G>C	intergenic_region	MODIFIER	intergenic_region	75	0	0	100	48	0.475	SNP	5.98219
S3600-THY_vs_S3600-LIVER-resent	chr1	86471779	86471779	G	A	1700019O17Rik-Ptma	n.86471779G>A	intergenic_region	MODIFIER	intergenic_region	87	0	0	119	64	0.534	SNP	5.77899
S3600-THY_vs_S3600-LIVER-resent	chr1	86483977	86483977	G	C	1700019O17Rik-Ptma	n.86483977G>C	intergenic_region	MODIFIER	intergenic_region	89	1	0.011	99	47	0.469	SNP	6.18888
S3600-THY_vs_S3600-LIVER-resent	chr1	86488984	86488984	C	G	1700019O17Rik-Ptma	n.86488984C>G	intergenic_region	MODIFIER	intergenic_region	99	0	0	140	55	0.394	SNP	6.13448
S3600-THY_vs_S3600-LIVER-resent	chr1	86685844	86685844	G	C	Nppc-Dis3l2	n.86685844G>C	intergenic_region	MODIFIER	intergenic_region	55	0	0	90	45	0.5	SNP	6.13164
S3600-THY_vs_S3600-LIVER-resent	chr1	86866134	86866134	G	GTAGA	Dis3l2	c.986+8760_986+8761insTAGA	intron_variant	MODIFIER	transcript	42	0	0	74	30	0.429	INSERTION.NumRepetitions_10orMore.EventLength_4	6.59457
S3600-THY_vs_S3600-LIVER-resent	chr1	87150273	87150273	G	T	Ecel1	c.1796+204C>A	intron_variant	MODIFIER	transcript	90	0	0	134	64	0.478	SNP	5.71419
S3600-THY_vs_S3600-LIVER-resent	chr1	87568701	87568701	C	G	Ngef	c.-74+4987G>C	intron_variant	MODIFIER	transcript	60	0	0	102	45	0.441	SNP	6.37441
S3600-THY_vs_S3600-LIVER-resent	chr1	87569284	87569284	C	G	Neu2	c.-10221C>G	upstream_gene_variant	MODIFIER	transcript	76	0	0	143	71	0.493	SNP	5.76906
S3600-THY_vs_S3600-LIVER-resent	chr1	87604139	87604139	C	G	Neu2-Inpp5d	n.87604139C>G	intergenic_region	MODIFIER	intergenic_region	70	0	0	112	60	0.537	SNP	6.15031
S3600-THY_vs_S3600-LIVER-resent	chr1	87816015	87816015	G	C	Sag	c.366+1142G>C	intron_variant	MODIFIER	transcript	73	0	0	114	25	0.221	SNP	5.62501
S3600-THY_vs_S3600-LIVER-resent	chr1	87845333	87845333	G	C	Sag	c.*310G>C	downstream_gene_variant	MODIFIER	transcript	56	0	0	90	23	0.256	SNP	5.13239
S3600-THY_vs_S3600-LIVER-resent	chr1	87849489	87849489	G	C	Dgkd	c.-3812G>C	upstream_gene_variant	MODIFIER	transcript	82	0	0	107	34	0.327	SNP	6.24997
S3600-THY_vs_S3600-LIVER-resent	chr1	87850698	87850698	G	C	Dgkd	c.-2603G>C	upstream_gene_variant	MODIFIER	transcript	76	0	0	127	47	0.37	SNP	5.75239
S3600-THY_vs_S3600-LIVER-resent	chr1	87910922	87910922	C	CCTTTCTTT	Dgkd	c.349-4178_349-4177insCTTTCTTT	intron_variant	MODIFIER	transcript	23	0	0	30	18	1	INSERTION.NumRepetitions_10orMore.EventLength_4	5.51765
S3600-THY_vs_S3600-LIVER-resent	chr1	87913322	87913322	C	G	Dgkd	c.349-1778C>G	intron_variant	MODIFIER	transcript	70	0	0	144	72	0.497	SNP	5.96356
S3600-THY_vs_S3600-LIVER-resent	chr1	88422247	88422247	G	C	Spp2	c.*10+1569G>C	intron_variant	MODIFIER	transcript	82	0	0	106	23	0.21	SNP	5.94162
S3600-THY_vs_S3600-LIVER-resent	chr1	88792658	88792658	G	C	Platr5-1700067G17Rik	n.88792658G>C	intergenic_region	MODIFIER	intergenic_region	75	0	0	106	29	0.269	SNP	5.75813
S3600-THY_vs_S3600-LIVER-resent	chr1	88994159	88994159	C	G	Platr5-1700067G17Rik	n.88994159C>G	intergenic_region	MODIFIER	intergenic_region	56	0	0	82	45	0.549	SNP	6.09789
S3600-THY_vs_S3600-LIVER-resent	chr1	88994524	88994524	C	G	Platr5-1700067G17Rik	n.88994524C>G	intergenic_region	MODIFIER	intergenic_region	17	0	0	38	23	0.605	SNP	4.92194
S3600-THY_vs_S3600-LIVER-resent	chr1	89213055	89213055	C	G	Sh3bp4-C030007H22Rik	n.89213055C>G	intergenic_region	MODIFIER	intergenic_region	59	0	0	95	56	0.585	SNP	6.04754
S3600-THY_vs_S3600-LIVER-resent	chr1	89254432	89254432	C	G	Sh3bp4-C030007H22Rik	n.89254432C>G	intergenic_region	MODIFIER	intergenic_region	62	0	0	112	49	0.432	SNP	5.99561
S3600-THY_vs_S3600-LIVER-resent	chr1	89280778	89280778	C	G	Sh3bp4-C030007H22Rik	n.89280778C>G	intergenic_region	MODIFIER	intergenic_region	74	0	0	110	53	0.481	SNP	5.99734
S3600-THY_vs_S3600-LIVER-resent	chr1	89364630	89364630	C	G	C030007H22Rik	n.101-2641G>C	intron_variant	MODIFIER	transcript	69	0	0	106	57	0.538	SNP	5.94811
S3600-THY_vs_S3600-LIVER-resent	chr1	89408203	89408203	C	G	C030007H22Rik	n.-2070G>C	upstream_gene_variant	MODIFIER	transcript	69	0	0	100	62	0.62	SNP	6.14894
S3600-THY_vs_S3600-LIVER-resent	chr1	89547768	89547768	C	G	Agap1	c.164-56830C>G	intron_variant	MODIFIER	transcript	67	0	0	110	39	0.355	SNP	6.38352
S3600-THY_vs_S3600-LIVER-resent	chr1	89685932	89685932	C	T	4933400F21Rik	n.-2040G>A	upstream_gene_variant	MODIFIER	transcript	87	0	0	126	55	0.438	SNP	5.94054
S3600-THY_vs_S3600-LIVER-resent	chr1	89692633	89692633	C	G	Agap1	c.1050+21362C>G	intron_variant	MODIFIER	transcript	54	0	0	97	58	0.594	SNP	5.82602
S3600-THY_vs_S3600-LIVER-resent	chr1	89701290	89701290	C	G	Agap1	c.1051-24671C>G	intron_variant	MODIFIER	transcript	84	0	0	114	56	0.487	SNP	5.62895
S3600-THY_vs_S3600-LIVER-resent	chr1	89996279	89996279	C	G	Asb18	c.261G>C	synonymous_variant	LOW	transcript	80	1	0.013	107	46	0.434	SNP	6.01275
S3600-THY_vs_S3600-LIVER-resent	chr1	90183639	90183639	C	G	Iqca-Ackr3	n.90183639C>G	intergenic_region	MODIFIER	intergenic_region	58	0	0	80	18	0.228	SNP	4.41295
S3600-THY_vs_S3600-LIVER-resent	chr1	90255269	90255269	C	G	Ackr3-Cops8	n.90255269C>G	intergenic_region	MODIFIER	intergenic_region	69	0	0	118	61	0.504	SNP	5.74024
S3600-THY_vs_S3600-LIVER-resent	chr1	90305201	90305201	C	G	Ackr3-Cops8	n.90305201C>G	intergenic_region	MODIFIER	intergenic_region	76	0	0	103	49	0.476	SNP	6.34969
S3600-THY_vs_S3600-LIVER-resent	chr1	90328275	90328275	C	G	Ackr3-Cops8	n.90328275C>G	intergenic_region	MODIFIER	intergenic_region	34	0	0	71	32	0.451	SNP	6.32558
S3600-THY_vs_S3600-LIVER-resent	chr1	90580941	90580941	C	G	Ackr3-Cops8	n.90580941C>G	intergenic_region	MODIFIER	intergenic_region	93	0	0	139	54	0.39	SNP	5.84461
S3600-THY_vs_S3600-LIVER-resent	chr1	90671851	90671851	C	G	Cops8-Col6a3	n.90671851C>G	intergenic_region	MODIFIER	intergenic_region	61	0	0	115	54	0.47	SNP	6.03002
S3600-THY_vs_S3600-LIVER-resent	chr1	90742958	90742958	G	C	Cops8-Col6a3	n.90742958G>C	intergenic_region	MODIFIER	intergenic_region	70	0	0	102	51	0.5	SNP	6.36013
S3600-THY_vs_S3600-LIVER-resent	chr1	90793443	90793443	C	G	Col6a3	c.6400-367G>C	intron_variant	MODIFIER	transcript	69	0	0	101	52	0.51	SNP	5.90545
S3600-THY_vs_S3600-LIVER-resent	chr1	90794843	90794843	C	G	Col6a3	c.6273+169G>C	intron_variant	MODIFIER	transcript	73	0	0	108	54	0.5	SNP	6.03813
S3600-THY_vs_S3600-LIVER-resent	chr1	90809469	90809469	C	G	Col6a3	c.3670+657G>C	intron_variant	MODIFIER	transcript	70	0	0	129	71	0.55	SNP	5.94909
S3600-THY_vs_S3600-LIVER-resent	chr1	90937909	90937909	C	G	Mlph	c.1101+172C>G	intron_variant	MODIFIER	transcript	72	0	0	131	57	0.435	SNP	5.84746
S3600-THY_vs_S3600-LIVER-resent	chr1	91425025	91425025	C	G	Per2	c.2297-539G>C	intron_variant	MODIFIER	transcript	54	1	0.019	76	25	0.329	SNP	5.4545
S3600-THY_vs_S3600-LIVER-resent	chr1	91425362	91425362	C	A	Per2	c.2297-876G>T	intron_variant	MODIFIER	transcript	88	0	0	112	34	0.304	SNP	6.09278
S3600-THY_vs_S3600-LIVER-resent	chr1	91480033	91480033	G	C	Per2-Traf3ip1	n.91480033G>C	intergenic_region	MODIFIER	intergenic_region	80	0	0	108	48	0.439	SNP	5.90249
S3600-THY_vs_S3600-LIVER-resent	chr1	91667950	91667950	G	C	Asb1-Twist2	n.91667950G>C	intergenic_region	MODIFIER	intergenic_region	71	0	0	122	25	0.207	SNP	5.17046
S3600-THY_vs_S3600-LIVER-resent	chr1	91982252	91982252	C	G	Hdac4	c.1289G>C	missense_variant&splice_region_variant	MODERATE	transcript	103	0	0	106	45	0.425	SNP	5.84801
S3600-THY_vs_S3600-LIVER-resent	chr1	92667312	92667312	C	G	Otos-Gpc1	n.92667312C>G	intergenic_region	MODIFIER	intergenic_region	83	0	0	134	68	0.507	SNP	6.01783
S3600-THY_vs_S3600-LIVER-resent	chr1	92676065	92676065	C	G	Otos-Gpc1	n.92676065C>G	intergenic_region	MODIFIER	intergenic_region	88	1	0.012	114	54	0.474	SNP	5.92739
S3600-THY_vs_S3600-LIVER-resent	chr1	92698214	92698214	C	G	Otos-Gpc1	n.92698214C>G	intergenic_region	MODIFIER	intergenic_region	70	0	0	114	61	0.535	SNP	6.10028
S3600-THY_vs_S3600-LIVER-resent	chr1	92831873	92831873	C	G	Gpc1	c.-59C>G	5_prime_UTR_variant	MODIFIER	transcript	96	1	0.011	114	60	0.526	SNP	5.82817
S3600-THY_vs_S3600-LIVER-resent	chr1	92869001	92869001	C	G	Ankmy1	c.*1271G>C	downstream_gene_variant	MODIFIER	transcript	83	0	0	150	72	0.48	SNP	6.19044
S3600-THY_vs_S3600-LIVER-resent	chr1	92943697	92943697	C	T	Capn10	c.1016C>T	missense_variant	MODERATE	transcript	85	0	0	131	57	0.438	SNP	5.84815
S3600-THY_vs_S3600-LIVER-resent	chr1	92954331	92954331	C	G	9430060I03Rik	n.-3741G>C	upstream_gene_variant	MODIFIER	transcript	63	0	0	123	69	0.561	SNP	6.00926
S3600-THY_vs_S3600-LIVER-resent	chr1	92996287	92996287	C	G	Gpr35-Aqp12	n.92996287C>G	intergenic_region	MODIFIER	intergenic_region	68	0	0	132	62	0.466	SNP	6.14052
S3600-THY_vs_S3600-LIVER-resent	chr1	93120008	93120008	C	G	Kif1a-Agxt	n.93120008C>G	intergenic_region	MODIFIER	intergenic_region	112	0	0	156	75	0.484	SNP	5.70918
S3600-THY_vs_S3600-LIVER-resent	chr1	93148625	93148625	C	G	Agxt	c.*3458C>G	downstream_gene_variant	MODIFIER	transcript	51	1	0.02	87	44	0.5	SNP	5.87758
S3600-THY_vs_S3600-LIVER-resent	chr1	93163559	93163559	C	G	2310007B03Rik	c.-3430G>C	upstream_gene_variant	MODIFIER	transcript	59	1	0.017	125	63	0.504	SNP	6.06736
S3600-THY_vs_S3600-LIVER-resent	chr1	93190044	93190044	C	G	Crocc2	c.930-20C>G	intron_variant	MODIFIER	transcript	77	1	0.013	106	40	0.381	SNP	5.84423
S3600-THY_vs_S3600-LIVER-resent	chr1	93202915	93202915	C	G	Crocc2	c.2898+19C>G	intron_variant	MODIFIER	transcript	86	0	0	114	61	0.545	SNP	5.65275
S3600-THY_vs_S3600-LIVER-resent	chr1	93364366	93364366	G	A	Ppp1r7	c.910-524G>A	intron_variant	MODIFIER	transcript	58	0	0	23	15	0.652	SNP	6.62325
S3600-THY_vs_S3600-LIVER-resent	chr1	93478386	93478386	T	TGG	2021-09-02	c.-10760_-10759insGG	upstream_gene_variant	MODIFIER	transcript	108	24	0	95	94	0.667	INSERTION.NumRepetitions_10orMore.EventLength_1.RepeatExpansion_G	5.97304
S3600-THY_vs_S3600-LIVER-resent	chr1	93630237	93630237	T	TAAATAAATAAAAA	Stk25	c.31-974_31-973insTTTTTATTTATTT	intron_variant	MODIFIER	transcript	81	10	0	88	74	1	INSERTION.NOVEL_10orMore	5.82433
S3600-THY_vs_S3600-LIVER-resent	chr1	93745263	93745263	C	G	Thap4	c.1216+4584G>C	intron_variant	MODIFIER	transcript	34	0	0	42	21	0.5	SNP	6.12184
S3600-THY_vs_S3600-LIVER-resent	chr1	94150872	94150872	C	G	Pdcd1-4930440C22Rik	n.94150872C>G	intergenic_region	MODIFIER	intergenic_region	62	0	0	81	38	0.463	SNP	6.03587
S3600-THY_vs_S3600-LIVER-resent	chr1	94229540	94229540	C	G	Pdcd1-4930440C22Rik	n.94229540C>G	intergenic_region	MODIFIER	intergenic_region	38	0	0	99	55	0.551	SNP	5.85403
S3600-THY_vs_S3600-LIVER-resent	chr1	94233389	94233389	C	G	Pdcd1-4930440C22Rik	n.94233389C>G	intergenic_region	MODIFIER	intergenic_region	38	0	0	90	46	0.511	SNP	5.80174
S3600-THY_vs_S3600-LIVER-resent	chr1	94251835	94251841	TTTATTA	T	Pdcd1-4930440C22Rik	n.94251836_94251841delTTATTA	intergenic_region	MODIFIER	intergenic_region	39	8	0	53	46	0.714	DELETION.NumRepetitions_10orMore.EventLength_3	6.3492
S3600-THY_vs_S3600-LIVER-resent	chr1	94305210	94305210	C	G	Pdcd1-4930440C22Rik	n.94305210C>G	intergenic_region	MODIFIER	intergenic_region	60	0	0	101	48	0.475	SNP	6.05256
S3600-THY_vs_S3600-LIVER-resent	chr1	94341984	94341984	C	G	Pdcd1-4930440C22Rik	n.94341984C>G	intergenic_region	MODIFIER	intergenic_region	79	0	0	112	51	0.464	SNP	5.70008
S3600-THY_vs_S3600-LIVER-resent	chr1	94468932	94468932	C	G	Pdcd1-4930440C22Rik	n.94468932C>G	intergenic_region	MODIFIER	intergenic_region	54	1	0.019	112	60	0.523	SNP	6.01999
S3600-THY_vs_S3600-LIVER-resent	chr1	94536558	94536558	C	G	Pdcd1-4930440C22Rik	n.94536558C>G	intergenic_region	MODIFIER	intergenic_region	62	0	0	87	45	0.517	SNP	6.29916
S3600-THY_vs_S3600-LIVER-resent	chr1	94669868	94669868	G	GTAGA	Pdcd1-4930440C22Rik	n.94669868_94669869insTAGA	intergenic_region	MODIFIER	intergenic_region	26	0	0	45	19	0.409	INSERTION.NumRepetitions_10orMore.EventLength_4	4.37348
S3600-THY_vs_S3600-LIVER-resent	chr1	94673928	94673928	C	G	Pdcd1-4930440C22Rik	n.94673928C>G	intergenic_region	MODIFIER	intergenic_region	67	0	0	92	43	0.462	SNP	5.86729
S3600-THY_vs_S3600-LIVER-resent	chr1	94721632	94721632	C	T	Pdcd1-4930440C22Rik	n.94721632C>T	intergenic_region	MODIFIER	intergenic_region	56	0	0	107	54	0.509	SNP	5.90936
S3600-THY_vs_S3600-LIVER-resent	chr1	94770050	94770050	C	A	Pdcd1-4930440C22Rik	n.94770050C>A	intergenic_region	MODIFIER	intergenic_region	86	0	0	126	57	0.456	SNP	5.87336
S3600-THY_vs_S3600-LIVER-resent	chr1	94773607	94773607	C	G	Pdcd1-4930440C22Rik	n.94773607C>G	intergenic_region	MODIFIER	intergenic_region	71	0	0	121	59	0.491	SNP	5.77312
S3600-THY_vs_S3600-LIVER-resent	chr1	94833917	94833917	C	G	4930440C22Rik-Fam174a	n.94833917C>G	intergenic_region	MODIFIER	intergenic_region	75	0	0	106	56	0.534	SNP	6.24866
S3600-THY_vs_S3600-LIVER-resent	chr1	94836026	94836026	C	G	4930440C22Rik-Fam174a	n.94836026C>G	intergenic_region	MODIFIER	intergenic_region	53	0	0	65	31	0.476	SNP	6.33983
S3600-THY_vs_S3600-LIVER-resent	chr1	94918580	94918580	C	A	4930440C22Rik-Fam174a	n.94918580C>A	intergenic_region	MODIFIER	intergenic_region	65	0	0	92	43	0.467	SNP	6.36594
S3600-THY_vs_S3600-LIVER-resent	chr1	94930359	94930359	C	G	4930440C22Rik-Fam174a	n.94930359C>G	intergenic_region	MODIFIER	intergenic_region	72	0	0	104	59	0.567	SNP	6.1592
S3600-THY_vs_S3600-LIVER-resent	chr1	95095140	95095140	C	G	4930440C22Rik-Fam174a	n.95095140C>G	intergenic_region	MODIFIER	intergenic_region	50	1	0.02	107	54	0.505	SNP	6.21683
S3600-THY_vs_S3600-LIVER-resent	chr1	95169940	95169940	C	G	4930440C22Rik-Fam174a	n.95169940C>G	intergenic_region	MODIFIER	intergenic_region	54	0	0	93	43	0.457	SNP	5.86386
S3600-THY_vs_S3600-LIVER-resent	chr1	95212382	95212382	C	G	4930440C22Rik-Fam174a	n.95212382C>G	intergenic_region	MODIFIER	intergenic_region	68	0	0	126	57	0.463	SNP	5.91224
S3600-THY_vs_S3600-LIVER-resent	chr1	95230743	95230743	C	G	4930440C22Rik-Fam174a	n.95230743C>G	intergenic_region	MODIFIER	intergenic_region	94	1	0.011	158	49	0.301	SNP	5.94768
S3600-THY_vs_S3600-LIVER-resent	chr1	95245255	95245255	C	G	4930440C22Rik-Fam174a	n.95245255C>G	intergenic_region	MODIFIER	intergenic_region	61	0	0	98	51	0.521	SNP	5.85153
S3600-THY_vs_S3600-LIVER-resent	chr1	95274850	95274850	C	G	4930440C22Rik-Fam174a	n.95274850C>G	intergenic_region	MODIFIER	intergenic_region	72	1	0.014	123	43	0.344	SNP	6.14139
S3600-THY_vs_S3600-LIVER-resent	chr1	95280423	95280423	C	G	4930440C22Rik-Fam174a	n.95280423C>G	intergenic_region	MODIFIER	intergenic_region	73	0	0	116	55	0.469	SNP	5.87579
S3600-THY_vs_S3600-LIVER-resent	chr1	95303941	95303941	C	G	4930440C22Rik-Fam174a	n.95303941C>G	intergenic_region	MODIFIER	intergenic_region	73	0	0	117	57	0.483	SNP	5.8081
S3600-THY_vs_S3600-LIVER-resent	chr1	95463389	95463389	C	G	Fam174a-St8sia4	n.95463389C>G	intergenic_region	MODIFIER	intergenic_region	34	0	0	58	30	0.517	SNP	5.83197
S3600-THY_vs_S3600-LIVER-resent	chr1	95488482	95488482	C	G	Fam174a-St8sia4	n.95488482C>G	intergenic_region	MODIFIER	intergenic_region	70	0	0	103	41	0.406	SNP	6.47813
S3600-THY_vs_S3600-LIVER-resent	chr1	95499098	95499098	C	G	Fam174a-St8sia4	n.95499098C>G	intergenic_region	MODIFIER	intergenic_region	53	0	0	78	41	0.526	SNP	6.10589
S3600-THY_vs_S3600-LIVER-resent	chr1	95673328	95673328	C	G	St8sia4-4930598F16Rik	n.95673328C>G	intergenic_region	MODIFIER	intergenic_region	82	0	0	125	69	0.553	SNP	6.02295
S3600-THY_vs_S3600-LIVER-resent	chr1	95698162	95698162	C	G	4930598F16Rik	n.*3022G>C	downstream_gene_variant	MODIFIER	transcript	54	0	0	83	36	0.439	SNP	6.13282
S3600-THY_vs_S3600-LIVER-resent	chr1	95735486	95735486	C	G	4930598F16Rik-1700063A18Rik	n.95735486C>G	intergenic_region	MODIFIER	intergenic_region	86	0	0	106	49	0.456	SNP	6.11839
S3600-THY_vs_S3600-LIVER-resent	chr1	95795489	95795489	C	G	4930598F16Rik-1700063A18Rik	n.95795489C>G	intergenic_region	MODIFIER	intergenic_region	70	0	0	94	49	0.516	SNP	6.03531
S3600-THY_vs_S3600-LIVER-resent	chr1	95876291	95876291	C	G	4930598F16Rik-1700063A18Rik	n.95876291C>G	intergenic_region	MODIFIER	intergenic_region	56	0	0	106	50	0.467	SNP	6.13359
S3600-THY_vs_S3600-LIVER-resent	chr1	95951513	95951513	C	G	4930598F16Rik-1700063A18Rik	n.95951513C>G	intergenic_region	MODIFIER	intergenic_region	64	0	0	118	56	0.47	SNP	6.23243
S3600-THY_vs_S3600-LIVER-resent	chr1	96332672	96332672	T	G	1700063A18Rik-4930533P14Rik	n.96332672T>G	intergenic_region	MODIFIER	intergenic_region	37	1	0.026	23	22	0.957	SNP	6.03907
S3600-THY_vs_S3600-LIVER-resent	chr1	96435397	96435417	CCAAGGAGCTAAAGAGATCTG	C	1700063A18Rik-4930533P14Rik	n.96435398_96435417delCAAGGAGCTAAAGAGATCTG	intergenic_region	MODIFIER	intergenic_region	44	0	0	15	12	0.8	DELETION.NumRepetitions_1.EventLength_10orMore	7.26716
S3600-THY_vs_S3600-LIVER-resent	chr1	96440803	96440803	C	G	1700063A18Rik-4930533P14Rik	n.96440803C>G	intergenic_region	MODIFIER	intergenic_region	41	1	0.024	9	8	0.889	SNP	6.83068
S3600-THY_vs_S3600-LIVER-resent	chr1	96849883	96849883	C	A	Slco4c1	c.608-5228G>T	intron_variant	MODIFIER	transcript	30	2	0.071	6	6	1	SNP	4.84238
S3600-THY_vs_S3600-LIVER-resent	chr1	97039813	97039815	ATT	A	Slco6b1-Slco6c1	n.97039814_97039815delTT	intergenic_region	MODIFIER	intergenic_region	32	0	0.03	32	31	0.972	DELETION.NumRepetitions_2.EventLength_1.RepeatExpansion_T	6.67014
S3600-THY_vs_S3600-LIVER-resent	chr1	97039815	97039815	T	TAAAAAA	Slco6b1-Slco6c1	n.97039815_97039816insAAAAAA	intergenic_region	MODIFIER	intergenic_region	32	0	0.03	32	31	0.972	INSERTION.NumRepetitions_1.EventLength_1.RepeatExpansion_A	6.67014
S3600-THY_vs_S3600-LIVER-resent	chr1	97231675	97231675	C	CAAAAA	Slco6c1-D1Ertd622e	n.97231675_97231676insAAAAA	intergenic_region	MODIFIER	intergenic_region	22	1	0	14	13	0.938	INSERTION.NumRepetitions_10orMore.EventLength_1.RepeatExpansion_A	7.0894
S3600-THY_vs_S3600-LIVER-resent	chr1	97325948	97325948	C	G	Slco6c1-D1Ertd622e	n.97325948C>G	intergenic_region	MODIFIER	intergenic_region	73	0	0	95	45	0.479	SNP	5.92789
S3600-THY_vs_S3600-LIVER-resent	chr1	97370010	97370010	A	AC	Slco6c1-D1Ertd622e	n.97370010_97370011insC	intergenic_region	MODIFIER	intergenic_region	20	1	0.05	47	47	1	INSERTION.NumRepetitions_6.EventLength_1.RepeatExpansion_C	6.92884
S3600-THY_vs_S3600-LIVER-resent	chr1	97465823	97465823	C	G	Slco6c1-D1Ertd622e	n.97465823C>G	intergenic_region	MODIFIER	intergenic_region	54	0	0	111	59	0.528	SNP	6.14228
S3600-THY_vs_S3600-LIVER-resent	chr1	97533292	97533292	G	C	Slco6c1-D1Ertd622e	n.97533292G>C	intergenic_region	MODIFIER	intergenic_region	72	0	0	99	51	0.526	SNP	5.87069
S3600-THY_vs_S3600-LIVER-resent	chr1	97650627	97650627	T	TCA	D1Ertd622e	c.-24+3972_-24+3973insTG	intron_variant	MODIFIER	transcript	21	1	0	22	22	1	INSERTION.NumRepetitions_10orMore.EventLength_2.RepeatExpansion_CA	6.44541
S3600-THY_vs_S3600-LIVER-resent	chr1	97708685	97708685	C	G	Ppip5k2	c.3278-855G>C	intron_variant	MODIFIER	transcript	79	0	0	101	48	0.48	SNP	5.93224
S3600-THY_vs_S3600-LIVER-resent	chr1	97728864	97728864	C	G	Ppip5k2	c.2547+54G>C	intron_variant	MODIFIER	transcript	81	0	0	120	60	0.5	SNP	5.80913
S3600-THY_vs_S3600-LIVER-resent	chr1	97736800	97736800	C	G	Ppip5k2	c.1939-1692G>C	intron_variant	MODIFIER	transcript	79	0	0	117	60	0.504	SNP	5.86586
S3600-THY_vs_S3600-LIVER-resent	chr1	97757656	97757656	C	G	Ppip5k2	c.329-722G>C	intron_variant	MODIFIER	transcript	81	0	0	108	45	0.415	SNP	6.19087
S3600-THY_vs_S3600-LIVER-resent	chr1	97779406	97779406	C	G	Gin1	c.333+1887C>G	intron_variant	MODIFIER	transcript	81	1	0.012	107	52	0.491	SNP	5.90827
S3600-THY_vs_S3600-LIVER-resent	chr1	97800697	97800697	G	C	Gin1-Pam	n.97800697G>C	intergenic_region	MODIFIER	intergenic_region	65	0	0	110	55	0.514	SNP	5.80129
S3600-THY_vs_S3600-LIVER-resent	chr1	97806237	97806237	C	G	Gin1-Pam	n.97806237C>G	intergenic_region	MODIFIER	intergenic_region	70	0	0	117	57	0.491	SNP	5.89033
S3600-THY_vs_S3600-LIVER-resent	chr1	97827260	97827260	C	G	Pam	c.2504-1223G>C	intron_variant	MODIFIER	transcript	77	0	0	98	31	0.326	SNP	5.82533
S3600-THY_vs_S3600-LIVER-resent	chr1	97831465	97831465	C	G	Pam	c.2493G>C	synonymous_variant	LOW	transcript	74	1	0.014	113	56	0.5	SNP	5.80279
S3600-THY_vs_S3600-LIVER-resent	chr1	97841246	97841246	C	G	Pam	c.1813-337G>C	intron_variant	MODIFIER	transcript	73	0	0	128	61	0.477	SNP	5.99219
S3600-THY_vs_S3600-LIVER-resent	chr1	97882465	97882465	G	C	Pam	c.1174+1661C>G	intron_variant	MODIFIER	transcript	73	0	0	111	48	0.432	SNP	6.1074
S3600-THY_vs_S3600-LIVER-resent	chr1	97900404	97900404	A	T	Pam	c.539-2015T>A	intron_variant	MODIFIER	transcript	24	0	0	18	17	0.944	SNP	6.04631
S3600-THY_vs_S3600-LIVER-resent	chr1	97900406	97900406	A	T	Pam	c.539-2017T>A	intron_variant	MODIFIER	transcript	24	0	0	18	17	0.944	SNP	6.04631
S3600-THY_vs_S3600-LIVER-resent	chr1	97961206	97961206	C	G	Pam	c.222+14579G>C	intron_variant	MODIFIER	transcript	76	0	0	150	61	0.411	SNP	5.8598
S3600-THY_vs_S3600-LIVER-resent	chr1	98004865	98004865	C	A	Pam	c.-302-27606G>T	intron_variant	MODIFIER	transcript	76	0	0	112	53	0.473	SNP	5.98347
S3600-THY_vs_S3600-LIVER-resent	chr1	98005871	98005871	C	G	Pam	c.-302-28612G>C	intron_variant	MODIFIER	transcript	80	1	0.013	110	57	0.518	SNP	5.96091
S3600-THY_vs_S3600-LIVER-resent	chr1	98014118	98014118	C	G	Pam	c.-302-36859G>C	intron_variant	MODIFIER	transcript	68	1	0.014	115	65	0.57	SNP	5.89135
S3600-THY_vs_S3600-LIVER-resent	chr1	98035798	98035798	C	G	Pam	c.-302-58539G>C	intron_variant	MODIFIER	transcript	54	0	0	115	60	0.513	SNP	6.12554
S3600-THY_vs_S3600-LIVER-resent	chr1	98048114	98048114	C	G	B230216N24Rik	n.-321G>C	upstream_gene_variant	MODIFIER	transcript	76	0	0	113	63	0.568	SNP	5.80221
S3600-THY_vs_S3600-LIVER-resent	chr1	98054692	98054692	C	G	Pam	c.-303+40793G>C	intron_variant	MODIFIER	transcript	80	0	0	106	43	0.41	SNP	5.96492
S3600-THY_vs_S3600-LIVER-resent	chr1	98068989	98068989	C	G	Pam	c.-303+26496G>C	intron_variant	MODIFIER	transcript	69	0	0	116	50	0.426	SNP	5.9707
S3600-THY_vs_S3600-LIVER-resent	chr1	98069864	98069864	C	G	Pam	c.-303+25621G>C	intron_variant	MODIFIER	transcript	91	0	0	117	57	0.487	SNP	6.14032
S3600-THY_vs_S3600-LIVER-resent	chr1	98078944	98078944	C	G	Pam	c.-303+16541G>C	intron_variant	MODIFIER	transcript	68	0	0	102	43	0.416	SNP	5.85133
S3600-THY_vs_S3600-LIVER-resent	chr1	98080344	98080344	C	G	Pam	c.-303+15141G>C	intron_variant	MODIFIER	transcript	74	1	0.014	106	52	0.495	SNP	6.08257
S3600-THY_vs_S3600-LIVER-resent	chr1	98083703	98083703	C	G	Pam	c.-303+11782G>C	intron_variant	MODIFIER	transcript	65	1	0.015	97	43	0.448	SNP	6.28377
S3600-THY_vs_S3600-LIVER-resent	chr1	98087141	98087141	C	G	Pam	c.-303+8344G>C	intron_variant	MODIFIER	transcript	82	0	0	99	53	0.536	SNP	5.90978
S3600-THY_vs_S3600-LIVER-resent	chr1	98209154	98209154	T	C	1810006J02Rik-Slco6d1	n.98209154T>C	intergenic_region	MODIFIER	intergenic_region	12	0	0	16	16	1	SNP	7.48318
S3600-THY_vs_S3600-LIVER-resent	chr1	98481258	98481259	AT	A	Slco6d1	c.1406+473delT	intron_variant	MODIFIER	transcript	52	0	0	88	28	0.318	DELETION.NumRepetitions_8.EventLength_1.RepeatExpansion_T	5.97919
S3600-THY_vs_S3600-LIVER-resent	chr1	98637508	98637508	C	G	Slco6d1-Cntnap5b	n.98637508C>G	intergenic_region	MODIFIER	intergenic_region	48	1	0.021	70	38	0.544	SNP	5.94809
S3600-THY_vs_S3600-LIVER-resent	chr1	98709421	98709421	C	CG	Slco6d1-Cntnap5b	n.98709421_98709422insG	intergenic_region	MODIFIER	intergenic_region	24	0	0.04	43	42	0.977	INSERTION.NumRepetitions_9.EventLength_1.RepeatExpansion_G	6.28015
S3600-THY_vs_S3600-LIVER-resent	chr1	98880322	98880322	G	GA	Slco6d1-Cntnap5b	n.98880322_98880323insA	intergenic_region	MODIFIER	intergenic_region	10	0	0	7	7	1	INSERTION.NumRepetitions_1.EventLength_1.RepeatExpansion_A	4.28887
S3600-THY_vs_S3600-LIVER-resent	chr1	98880324	98880324	G	GAA	Slco6d1-Cntnap5b	n.98880324_98880325insAA	intergenic_region	MODIFIER	intergenic_region	10	0	0	7	7	1	INSERTION.NOVEL_1.Novel_A	4.28887
S3600-THY_vs_S3600-LIVER-resent	chr1	99659639	99659639	C	T	Slco6d1-Cntnap5b	n.99659639C>T	intergenic_region	MODIFIER	intergenic_region	32	0	0	8	6	0.75	SNP	5.13699
S3600-THY_vs_S3600-LIVER-resent	chr1	99660803	99660807	AACAC	A	Slco6d1-Cntnap5b	n.99660804_99660807delACAC	intergenic_region	MODIFIER	intergenic_region	20	3	0	9	9	1	DELETION.NumRepetitions_10orMore.EventLength_2.RepeatExpansion_AC	4.65823
S3600-THY_vs_S3600-LIVER-resent	chr1	99712033	99712033	C	G	Slco6d1-Cntnap5b	n.99712033C>G	intergenic_region	MODIFIER	intergenic_region	47	0	0	99	47	0.475	SNP	5.89588
S3600-THY_vs_S3600-LIVER-resent	chr1	99757892	99757892	C	A	Slco6d1-Cntnap5b	n.99757892C>A	intergenic_region	MODIFIER	intergenic_region	43	0	0	55	31	0.564	SNP	6.14432
S3600-THY_vs_S3600-LIVER-resent	chr1	99831244	99831244	C	A	Cntnap5b	c.82+58398C>A	intron_variant	MODIFIER	transcript	48	0	0	92	46	0.495	SNP	5.95108
S3600-THY_vs_S3600-LIVER-resent	chr1	99924745	99924749	AAGAG	A	Cntnap5b	c.83-15897_83-15894delAGAG	intron_variant	MODIFIER	transcript	15	0	0	9	8	0.889	DELETION.NumRepetitions_3.EventLength_2.RepeatExpansion_AG	4.91232
S3600-THY_vs_S3600-LIVER-resent	chr1	99929173	99929173	T	TACACACACACACAC	Cntnap5b	c.83-11470_83-11469insACACACACACACAC	intron_variant	MODIFIER	transcript	13	0	0.071	6	6	1	INSERTION.NumRepetitions_10orMore.EventLength_2.RepeatExpansion_AC	4.43348
S3600-THY_vs_S3600-LIVER-resent	chr1	99935721	99935721	C	CT	Cntnap5b	c.83-4922_83-4921insT	intron_variant	MODIFIER	transcript	58	0	0	88	35	0.398	INSERTION.NumRepetitions_4.EventLength_1.RepeatExpansion_T	6.12539
S3600-THY_vs_S3600-LIVER-resent	chr1	99991944	99991946	GAA	G	Cntnap5b	c.381+24560_381+24561delAA	intron_variant	MODIFIER	transcript	27	0	0	32	32	1	DELETION.NumRepetitions_3.EventLength_1.RepeatExpansion_A	5.99578
S3600-THY_vs_S3600-LIVER-resent	chr1	100326650	100326650	A	ATCTCTCTCTCTCTCTCTCTCTCTCTCTCTCTCTCTCTCTC	Cntnap5b	c.2075-32004_2075-32003insTCTCTCTCTCTCTCTCTCTCTCTCTCTCTCTCTCTCTCTC	intron_variant	MODIFIER	transcript	26	0	0	14	14	1	INSERTION.NumRepetitions_10orMore.EventLength_2.RepeatExpansion_TC	7.80332
S3600-THY_vs_S3600-LIVER-resent	chr1	100333175	100333175	C	G	Cntnap5b	c.2075-25479C>G	intron_variant	MODIFIER	transcript	60	1	0.017	97	51	0.521	SNP	5.81898
S3600-THY_vs_S3600-LIVER-resent	chr1	100505869	100505880	AATGGCCAAGAG	A	Cntnap5b-Gm20268	n.100505870_100505880delATGGCCAAGAG	intergenic_region	MODIFIER	intergenic_region	12	0	0	14	5	0.357	DELETION.NumRepetitions_1.EventLength_10orMore	1.37187
S3600-THY_vs_S3600-LIVER-resent	chr1	101811035	101811035	T	TACACACAC	Gm20268-Cdh20	n.101811035_101811036insACACACAC	intergenic_region	MODIFIER	intergenic_region	25	0	0	17	16	0.944	INSERTION.NumRepetitions_10orMore.EventLength_2.RepeatExpansion_AC	7.68779
S3600-THY_vs_S3600-LIVER-resent	chr1	102556361	102556361	C	G	Gm20268-Cdh20	n.102556361C>G	intergenic_region	MODIFIER	intergenic_region	61	0	0	105	51	0.485	SNP	5.85314
S3600-THY_vs_S3600-LIVER-resent	chr1	102712999	102713000	AC	A	Gm20268-Cdh20	n.102713000delC	intergenic_region	MODIFIER	intergenic_region	54	0	0	90	23	0.256	DELETION.NumRepetitions_8.EventLength_1.RepeatExpansion_C	5.10455
S3600-THY_vs_S3600-LIVER-resent	chr1	102778400	102778400	C	T	Gm20268-Cdh20	n.102778400C>T	intergenic_region	MODIFIER	intergenic_region	62	1	0.016	92	45	0.495	SNP	6.1823
S3600-THY_vs_S3600-LIVER-resent	chr1	102993439	102993439	C	T	Gm20268-Cdh20	n.102993439C>T	intergenic_region	MODIFIER	intergenic_region	60	0	0	112	61	0.545	SNP	5.74656
S3600-THY_vs_S3600-LIVER-resent	chr1	103379443	103379443	C	CCTTGCATTTGGAGCATAGCTATTCAGAATTG	Gm20268-Cdh20	n.103379443_103379444insCTTGCATTTGGAGCATAGCTATTCAGAATTG	intergenic_region	MODIFIER	intergenic_region	38	0	0	32	31	0.969	INSERTION.NOVEL_10orMore	6.10981
S3600-THY_vs_S3600-LIVER-resent	chr1	103434992	103434992	G	GGAAGGAAAGAAA	Gm20268-Cdh20	n.103434992_103434993insGAAGGAAAGAAA	intergenic_region	MODIFIER	intergenic_region	18	0	0	18	18	1	INSERTION.NOVEL_10orMore	7.14494
S3600-THY_vs_S3600-LIVER-resent	chr1	103438234	103438234	C	G	Gm20268-Cdh20	n.103438234C>G	intergenic_region	MODIFIER	intergenic_region	57	0	0	108	48	0.444	SNP	6.28513
S3600-THY_vs_S3600-LIVER-resent	chr1	104368586	104368586	C	G	Gm20268-Cdh20	n.104368586C>G	intergenic_region	MODIFIER	intergenic_region	51	0	0	88	41	0.477	SNP	5.75566
S3600-THY_vs_S3600-LIVER-resent	chr1	104899116	104899120	AACAC	A	Cdh20	c.-140-34840_-140-34837delACAC	intron_variant	MODIFIER	transcript	35	0	0	12	8	0.5	DELETION.NumRepetitions_10orMore.EventLength_2.RepeatExpansion_AC	5.80296
S3600-THY_vs_S3600-LIVER-resent	chr1	104947247	104947247	A	T	Cdh20	c.830-77A>T	intron_variant	MODIFIER	transcript	66	0	0	115	49	0.426	SNP	6.26578
S3600-THY_vs_S3600-LIVER-resent	chr1	105038896	105038896	T	TGG	Cdh20-Rnf152	n.105038896_105038897insGG	intergenic_region	MODIFIER	intergenic_region	32	5	0	34	34	1	INSERTION.NumRepetitions_10orMore.EventLength_1.RepeatExpansion_G	6.07911
S3600-THY_vs_S3600-LIVER-resent	chr1	105050880	105050880	C	G	Cdh20-Rnf152	n.105050880C>G	intergenic_region	MODIFIER	intergenic_region	46	1	0.023	106	60	0.571	SNP	6.20266
S3600-THY_vs_S3600-LIVER-resent	chr1	105059710	105059710	C	G	Cdh20-Rnf152	n.105059710C>G	intergenic_region	MODIFIER	intergenic_region	79	0	0	112	60	0.545	SNP	6.24932
S3600-THY_vs_S3600-LIVER-resent	chr1	105117390	105117393	CTTT	C	Cdh20-Rnf152	n.105117391_105117393delTTT	intergenic_region	MODIFIER	intergenic_region	72	17	0	90	89	0.667	DELETION.NumRepetitions_10orMore.EventLength_1.RepeatExpansion_T	6.04251
S3600-THY_vs_S3600-LIVER-resent	chr1	105123247	105123247	G	A	Cdh20-Rnf152	n.105123247G>A	intergenic_region	MODIFIER	intergenic_region	35	0	0	10	6	0.6	SNP	4.58867
S3600-THY_vs_S3600-LIVER-resent	chr1	105140765	105140765	C	G	Cdh20-Rnf152	n.105140765C>G	intergenic_region	MODIFIER	intergenic_region	66	0	0	104	56	0.538	SNP	6.15686
S3600-THY_vs_S3600-LIVER-resent	chr1	105289974	105289974	C	G	Rnf152	c.-124-5020G>C	intron_variant	MODIFIER	transcript	85	0	0	97	56	0.573	SNP	6.03195
S3600-THY_vs_S3600-LIVER-resent	chr1	105381886	105381886	C	G	Rnf152-Pign	n.105381886C>G	intergenic_region	MODIFIER	intergenic_region	79	0	0	111	52	0.464	SNP	6.01891
S3600-THY_vs_S3600-LIVER-resent	chr1	105383808	105383812	GAAAT	G	Rnf152-Pign	n.105383809_105383812delAAAT	intergenic_region	MODIFIER	intergenic_region	20	0	0	17	8	0.471	DELETION.NumRepetitions_1.EventLength_4	3.20089
S3600-THY_vs_S3600-LIVER-resent	chr1	105430033	105430033	C	G	Rnf152-Pign	n.105430033C>G	intergenic_region	MODIFIER	intergenic_region	74	0	0	108	52	0.481	SNP	5.75891
S3600-THY_vs_S3600-LIVER-resent	chr1	105440607	105440607	C	G	Rnf152-Pign	n.105440607C>G	intergenic_region	MODIFIER	intergenic_region	65	0	0	105	49	0.462	SNP	5.84774
S3600-THY_vs_S3600-LIVER-resent	chr1	105472390	105472390	C	G	Rnf152-Pign	n.105472390C>G	intergenic_region	MODIFIER	intergenic_region	55	1	0.019	14	12	0.857	SNP	6.15891
S3600-THY_vs_S3600-LIVER-resent	chr1	105507535	105507535	C	G	Rnf152-Pign	n.105507535C>G	intergenic_region	MODIFIER	intergenic_region	62	1	0.016	118	65	0.557	SNP	5.82394
S3600-THY_vs_S3600-LIVER-resent	chr1	105537337	105537337	A	G	Pign	c.2672+9327T>C	intron_variant	MODIFIER	transcript	43	1	0.024	13	12	0.923	SNP	7.42522
S3600-THY_vs_S3600-LIVER-resent	chr1	105553423	105553423	C	G	Pign	c.2502+641G>C	intron_variant	MODIFIER	transcript	67	0	0	125	67	0.528	SNP	5.89557
S3600-THY_vs_S3600-LIVER-resent	chr1	105609779	105609779	T	C	Pign	c.1173-10652A>G	intron_variant	MODIFIER	transcript	49	1	0.02	12	12	1	SNP	6.72736
S3600-THY_vs_S3600-LIVER-resent	chr1	106275433	106275433	G	C	Phlpp1	c.1445-5930G>C	intron_variant	MODIFIER	transcript	61	0	0	111	23	0.209	SNP	4.59165
S3600-THY_vs_S3600-LIVER-resent	chr1	106410647	106410667	GGAAGAGAAGAGAAGAGAAGA	G	Phlpp1-Bcl2	n.106410648_106410667delGAAGAGAAGAGAAGAGAAGA	intergenic_region	MODIFIER	intergenic_region	11	0	0	10	7	0.7	DELETION.NumRepetitions_9.EventLength_5	2.98632
S3600-THY_vs_S3600-LIVER-resent	chr1	106729291	106729291	C	G	Kdsr	c.778-1561G>C	intron_variant	MODIFIER	transcript	86	1	0.012	122	60	0.496	SNP	5.63255
S3600-THY_vs_S3600-LIVER-resent	chr1	106823991	106823991	C	G	Vps4b-Serpinb5	n.106823991C>G	intergenic_region	MODIFIER	intergenic_region	54	0	0	113	63	0.554	SNP	5.96441
S3600-THY_vs_S3600-LIVER-resent	chr1	106929236	106929236	C	G	Serpinb5-Serpinb12	n.106929236C>G	intergenic_region	MODIFIER	intergenic_region	78	0	0	119	58	0.487	SNP	5.98563
S3600-THY_vs_S3600-LIVER-resent	chr1	107008717	107008717	C	G	Serpinb13-Serpinb3a	n.107008717C>G	intergenic_region	MODIFIER	intergenic_region	64	0	0	98	51	0.521	SNP	6.15987
S3600-THY_vs_S3600-LIVER-resent	chr1	107034382	107034382	C	G	Serpinb13-Serpinb3a	n.107034382C>G	intergenic_region	MODIFIER	intergenic_region	66	0	0	97	51	0.531	SNP	5.96503
S3600-THY_vs_S3600-LIVER-resent	chr1	107067388	107067388	G	C	Serpinb3a-Serpinb3d	n.107067388G>C	intergenic_region	MODIFIER	intergenic_region	54	0	0	109	22	0.202	SNP	3.93248
S3600-THY_vs_S3600-LIVER-resent	chr1	107177911	107177911	C	G	Serpinb3b-Serpinb3c	n.107177911C>G	intergenic_region	MODIFIER	intergenic_region	65	0	0	94	44	0.467	SNP	5.80764
S3600-THY_vs_S3600-LIVER-resent	chr1	107301204	107301204	C	G	Serpinb3c-Serpinb11	n.107301204C>G	intergenic_region	MODIFIER	intergenic_region	70	0	0	132	66	0.5	SNP	5.81765
S3600-THY_vs_S3600-LIVER-resent	chr1	107591556	107591556	G	C	Serpinb8	c.-16+1269G>C	intron_variant	MODIFIER	transcript	61	0	0	101	49	0.485	SNP	5.98212
S3600-THY_vs_S3600-LIVER-resent	chr1	107638700	107638700	C	T	Serpinb8-D830032E09Rik	n.107638700C>T	intergenic_region	MODIFIER	intergenic_region	62	0	0	102	45	0.441	SNP	5.86391
S3600-THY_vs_S3600-LIVER-resent	chr1	107700851	107700865	CATGTATATATATAT	C	Serpinb8-D830032E09Rik	n.107700852_107700865delATGTATATATATAT	intergenic_region	MODIFIER	intergenic_region	9	0	0	15	13	0.867	DELETION.NumRepetitions_1.EventLength_10orMore	4.37608
S3600-THY_vs_S3600-LIVER-resent	chr1	108201906	108201906	C	T	D830032E09Rik-Cdh7	n.108201906C>T	intergenic_region	MODIFIER	intergenic_region	79	0	0	104	41	0.396	SNP	6.25066
S3600-THY_vs_S3600-LIVER-resent	chr1	108280569	108280569	C	T	D830032E09Rik-Cdh7	n.108280569C>T	intergenic_region	MODIFIER	intergenic_region	40	0	0	98	44	0.449	SNP	6.35981
S3600-THY_vs_S3600-LIVER-resent	chr1	108347292	108347292	C	CTT	D830032E09Rik-Cdh7	n.108347292_108347293insTT	intergenic_region	MODIFIER	intergenic_region	21	0	0	21	21	1	INSERTION.NumRepetitions_10orMore.EventLength_1.RepeatExpansion_T	6.78119
S3600-THY_vs_S3600-LIVER-resent	chr1	108617692	108617692	C	T	D830032E09Rik-Cdh7	n.108617692C>T	intergenic_region	MODIFIER	intergenic_region	8	0	0	20	18	0.9	SNP	4.83928
S3600-THY_vs_S3600-LIVER-resent	chr1	108852850	108852850	C	G	D830032E09Rik-Cdh7	n.108852850C>G	intergenic_region	MODIFIER	intergenic_region	49	0	0	101	50	0.49	SNP	6.0514
S3600-THY_vs_S3600-LIVER-resent	chr1	108853402	108853402	C	T	D830032E09Rik-Cdh7	n.108853402C>T	intergenic_region	MODIFIER	intergenic_region	57	0	0	90	41	0.456	SNP	5.88367
S3600-THY_vs_S3600-LIVER-resent	chr1	108960577	108960577	C	G	D830032E09Rik-Cdh7	n.108960577C>G	intergenic_region	MODIFIER	intergenic_region	61	0	0	107	51	0.477	SNP	5.8657
S3600-THY_vs_S3600-LIVER-resent	chr1	109103740	109103740	G	GACACACACACACACAC	D830032E09Rik-Cdh7	n.109103740_109103741insACACACACACACACAC	intergenic_region	MODIFIER	intergenic_region	18	0	0	8	8	1	INSERTION.NumRepetitions_10orMore.EventLength_2.RepeatExpansion_AC	6.19376
S3600-THY_vs_S3600-LIVER-resent	chr1	109274817	109274817	C	G	D830032E09Rik-Cdh7	n.109274817C>G	intergenic_region	MODIFIER	intergenic_region	55	0	0	100	48	0.475	SNP	5.91791
S3600-THY_vs_S3600-LIVER-resent	chr1	109567291	109567291	G	GTTTTTTTTTTTT	D830032E09Rik-Cdh7	n.109567291_109567292insTTTTTTTTTTTT	intergenic_region	MODIFIER	intergenic_region	28	1	1	10	7	1	INSERTION.NumRepetitions_10orMore.EventLength_1.RepeatExpansion_T	4.15722
S3600-THY_vs_S3600-LIVER-resent	chr1	109587662	109587662	G	A	D830032E09Rik-Cdh7	n.109587662G>A	intergenic_region	MODIFIER	intergenic_region	39	1	0.026	10	8	0.8	SNP	6.06595
S3600-THY_vs_S3600-LIVER-resent	chr1	109649624	109649624	T	TTTTTTTTTTTTG	D830032E09Rik-Cdh7	n.109649624_109649625insTTTTTTTTTTTG	intergenic_region	MODIFIER	intergenic_region	38	1	0.026	14	14	1	INSERTION.NOVEL_10orMore	6.76068
S3600-THY_vs_S3600-LIVER-resent	chr1	109708027	109708027	C	A	D830032E09Rik-Cdh7	n.109708027C>A	intergenic_region	MODIFIER	intergenic_region	47	1	0.021	19	18	0.947	SNP	7.38854
S3600-THY_vs_S3600-LIVER-resent	chr1	109893228	109893228	T	C	D830032E09Rik-Cdh7	n.109893228T>C	intergenic_region	MODIFIER	intergenic_region	35	0	0	8	8	1	SNP	8.16139
S3600-THY_vs_S3600-LIVER-resent	chr1	110052330	110052330	C	G	Cdh7	c.506-519C>G	intron_variant	MODIFIER	transcript	70	0	0	116	48	0.414	SNP	6.22022
S3600-THY_vs_S3600-LIVER-resent	chr1	110113589	110113589	G	T	Cdh7	c.1864+4634G>T	intron_variant	MODIFIER	transcript	22	0	0	33	24	0.727	SNP	6.00679
S3600-THY_vs_S3600-LIVER-resent	chr1	110302917	110302917	G	GTTTTTTTTTTTTT	Cdh7-Cdh19	n.110302917_110302918insTTTTTTTTTTTTT	intergenic_region	MODIFIER	intergenic_region	46	2	0	16	15	0.667	INSERTION.NumRepetitions_10orMore.EventLength_1.RepeatExpansion_T	6.8995
S3600-THY_vs_S3600-LIVER-resent	chr1	110487889	110487889	T	G	Cdh7-Cdh19	n.110487889T>G	intergenic_region	MODIFIER	intergenic_region	63	1	0.016	18	16	0.889	SNP	7.39049
S3600-THY_vs_S3600-LIVER-resent	chr1	110549935	110549935	T	C	Cdh7-Cdh19	n.110549935T>C	intergenic_region	MODIFIER	intergenic_region	39	0	0	51	49	0.96	SNP	6.30371
S3600-THY_vs_S3600-LIVER-resent	chr1	110724016	110724016	C	G	Cdh7-Cdh19	n.110724016C>G	intergenic_region	MODIFIER	intergenic_region	48	0	0	104	54	0.515	SNP	5.96341
S3600-THY_vs_S3600-LIVER-resent	chr1	110971689	110971689	G	T	Cdh19	c.-113+5558C>A	intron_variant	MODIFIER	transcript	69	0	0	113	29	0.25	SNP	5.95344
S3600-THY_vs_S3600-LIVER-resent	chr1	111141419	111141419	C	G	Cdh19-Dsel	n.111141419C>G	intergenic_region	MODIFIER	intergenic_region	49	0	0	88	41	0.466	SNP	6.32286
S3600-THY_vs_S3600-LIVER-resent	chr1	111190854	111190854	G	C	Cdh19-Dsel	n.111190854G>C	intergenic_region	MODIFIER	intergenic_region	58	0	0	114	50	0.442	SNP	5.99154
S3600-THY_vs_S3600-LIVER-resent	chr1	111273540	111273540	C	G	Cdh19-Dsel	n.111273540C>G	intergenic_region	MODIFIER	intergenic_region	61	0	0	95	49	0.511	SNP	6.4352
S3600-THY_vs_S3600-LIVER-resent	chr1	111494320	111494336	CACACACACACATATAT	C	Cdh19-Dsel	n.111494321_111494336delACACACACACATATAT	intergenic_region	MODIFIER	intergenic_region	15	1	0	6	6	1	DELETION.NumRepetitions_1.EventLength_10orMore	3.88941
S3600-THY_vs_S3600-LIVER-resent	chr1	111535447	111535447	C	G	Cdh19-Dsel	n.111535447C>G	intergenic_region	MODIFIER	intergenic_region	64	0	0	102	40	0.408	SNP	5.8415
S3600-THY_vs_S3600-LIVER-resent	chr1	111691225	111691226	TA	T	Cdh19-Dsel	n.111691226delA	intergenic_region	MODIFIER	intergenic_region	39	1	0.026	8	7	0.875	DELETION.NumRepetitions_9.EventLength_1.RepeatExpansion_A	6.00202
S3600-THY_vs_S3600-LIVER-resent	chr1	111772612	111772612	C	T	Cdh19-Dsel	n.111772612C>T	intergenic_region	MODIFIER	intergenic_region	20	0	0	6	5	0.833	SNP	4.03994
S3600-THY_vs_S3600-LIVER-resent	chr1	112187827	112187827	T	TC	Dsel-Cntnap5a	n.112187827_112187828insC	intergenic_region	MODIFIER	intergenic_region	46	10	0	72	71	0.5	INSERTION.NumRepetitions_9.EventLength_1.RepeatExpansion_C	6.29796
S3600-THY_vs_S3600-LIVER-resent	chr1	112266369	112266369	C	CA	Dsel-Cntnap5a	n.112266369_112266370insA	intergenic_region	MODIFIER	intergenic_region	43	1	0.023	13	11	0.846	INSERTION.NumRepetitions_2.EventLength_1.RepeatExpansion_A	6.32925
S3600-THY_vs_S3600-LIVER-resent	chr1	112388288	112388289	TA	T	Dsel-Cntnap5a	n.112388289delA	intergenic_region	MODIFIER	intergenic_region	56	0	0	80	78	0.975	DELETION.NumRepetitions_1.EventLength_1.RepeatExpansion_A	5.88695
S3600-THY_vs_S3600-LIVER-resent	chr1	112429294	112429294	C	A	Dsel-Cntnap5a	n.112429294C>A	intergenic_region	MODIFIER	intergenic_region	63	0	0	105	39	0.371	SNP	6.00323
S3600-THY_vs_S3600-LIVER-resent	chr1	112599601	112599601	A	G	Dsel-Cntnap5a	n.112599601A>G	intergenic_region	MODIFIER	intergenic_region	58	1	0.017	17	16	0.941	SNP	6.00424
S3600-THY_vs_S3600-LIVER-resent	chr1	112797067	112797067	A	ATT	Dsel-Cntnap5a	n.112797067_112797068insTT	intergenic_region	MODIFIER	intergenic_region	54	6	0	81	80	1	INSERTION.NumRepetitions_10orMore.EventLength_1.RepeatExpansion_T	5.85055
S3600-THY_vs_S3600-LIVER-resent	chr1	113132378	113132378	C	G	Dsel-Cntnap5a	n.113132378C>G	intergenic_region	MODIFIER	intergenic_region	58	0	0	105	49	0.471	SNP	6.14233
S3600-THY_vs_S3600-LIVER-resent	chr1	113194509	113194509	C	CATACATATATATATATATATATAT	Dsel-Cntnap5a	n.113194509_113194510insATACATATATATATATATATATAT	intergenic_region	MODIFIER	intergenic_region	17	0	0	5	5	1	INSERTION.NOVEL_10orMore	4.42052
S3600-THY_vs_S3600-LIVER-resent	chr1	113286645	113286645	C	T	Dsel-Cntnap5a	n.113286645C>T	intergenic_region	MODIFIER	intergenic_region	48	0	0	95	40	0.421	SNP	6.58799
S3600-THY_vs_S3600-LIVER-resent	chr1	113305388	113305388	C	CTGTGTGTGTG	Dsel-Cntnap5a	n.113305388_113305389insTGTGTGTGTG	intergenic_region	MODIFIER	intergenic_region	19	0	0	16	16	1	INSERTION.NumRepetitions_10orMore.EventLength_2.RepeatExpansion_TG	6.50335
S3600-THY_vs_S3600-LIVER-resent	chr1	113324050	113324050	T	C	Dsel-Cntnap5a	n.113324050T>C	intergenic_region	MODIFIER	intergenic_region	53	0	0	109	46	0.434	SNP	6.22458
S3600-THY_vs_S3600-LIVER-resent	chr1	113403906	113403906	G	T	Dsel-Cntnap5a	n.113403906G>T	intergenic_region	MODIFIER	intergenic_region	40	0	0	12	11	0.917	SNP	7.35749
S3600-THY_vs_S3600-LIVER-resent	chr1	113596395	113596395	G	A	Dsel-Cntnap5a	n.113596395G>A	intergenic_region	MODIFIER	intergenic_region	78	0	0	96	42	0.442	SNP	6.15682
S3600-THY_vs_S3600-LIVER-resent	chr1	113720964	113720965	CT	C	Dsel-Cntnap5a	n.113720965delT	intergenic_region	MODIFIER	intergenic_region	37	0	0	65	25	0.391	DELETION.NumRepetitions_8.EventLength_1.RepeatExpansion_T	5.73153
S3600-THY_vs_S3600-LIVER-resent	chr1	113852676	113852676	C	G	Dsel-Cntnap5a	n.113852676C>G	intergenic_region	MODIFIER	intergenic_region	52	0	0	96	43	0.448	SNP	5.88743
S3600-THY_vs_S3600-LIVER-resent	chr1	114029492	114029492	A	G	Dsel-Cntnap5a	n.114029492A>G	intergenic_region	MODIFIER	intergenic_region	48	1	0.021	11	9	0.818	SNP	7.37475
S3600-THY_vs_S3600-LIVER-resent	chr1	114268350	114268350	C	G	Dsel-Cntnap5a	n.114268350C>G	intergenic_region	MODIFIER	intergenic_region	54	1	0.019	93	57	0.613	SNP	6.26208
S3600-THY_vs_S3600-LIVER-resent	chr1	114306099	114306099	A	AAGGAGGAGGAGGAGGAGGAGGAGGAGG	Dsel-Cntnap5a	n.114306099_114306100insAGGAGGAGGAGGAGGAGGAGGAGGAGG	intergenic_region	MODIFIER	intergenic_region	13	0	0	6	6	1	INSERTION.NumRepetitions_10orMore.EventLength_3	4.43348
S3600-THY_vs_S3600-LIVER-resent	chr1	114423468	114423468	A	G	Dsel-Cntnap5a	n.114423468A>G	intergenic_region	MODIFIER	intergenic_region	41	0	0	67	34	0.507	SNP	5.91621
S3600-THY_vs_S3600-LIVER-resent	chr1	114825877	114825877	C	G	Dsel-Cntnap5a	n.114825877C>G	intergenic_region	MODIFIER	intergenic_region	51	0	0	102	56	0.551	SNP	6.08584
S3600-THY_vs_S3600-LIVER-resent	chr1	114831979	114831979	C	G	Dsel-Cntnap5a	n.114831979C>G	intergenic_region	MODIFIER	intergenic_region	63	1	0.016	119	53	0.441	SNP	5.95203
S3600-THY_vs_S3600-LIVER-resent	chr1	114875830	114875830	G	GAAA	Dsel-Cntnap5a	n.114875830_114875831insAAA	intergenic_region	MODIFIER	intergenic_region	22	0	0	10	10	1	INSERTION.NumRepetitions_10orMore.EventLength_1.RepeatExpansion_A	7.80964
S3600-THY_vs_S3600-LIVER-resent	chr1	115053612	115053612	C	G	Dsel-Cntnap5a	n.115053612C>G	intergenic_region	MODIFIER	intergenic_region	54	0	0	100	43	0.43	SNP	6.39823
S3600-THY_vs_S3600-LIVER-resent	chr1	115062564	115062564	C	T	Dsel-Cntnap5a	n.115062564C>T	intergenic_region	MODIFIER	intergenic_region	53	0	0	99	53	0.537	SNP	6.10777
S3600-THY_vs_S3600-LIVER-resent	chr1	115064263	115064263	C	G	Dsel-Cntnap5a	n.115064263C>G	intergenic_region	MODIFIER	intergenic_region	65	1	0.015	103	43	0.412	SNP	5.85279
S3600-THY_vs_S3600-LIVER-resent	chr1	115066608	115066608	A	AAGGG	Dsel-Cntnap5a	n.115066608_115066609insAGGG	intergenic_region	MODIFIER	intergenic_region	8	0	0	14	14	1	INSERTION.NumRepetitions_3.EventLength_4	5.50484
S3600-THY_vs_S3600-LIVER-resent	chr1	115083234	115083234	A	ATATATATATATATATAT	Dsel-Cntnap5a	n.115083234_115083235insTATATATATATATATAT	intergenic_region	MODIFIER	intergenic_region	28	0	0	17	7	0.412	INSERTION.NOVEL_10orMore	3.36799
S3600-THY_vs_S3600-LIVER-resent	chr1	115178858	115178858	T	A	Dsel-Cntnap5a	n.115178858T>A	intergenic_region	MODIFIER	intergenic_region	46	1	0.022	13	12	0.923	SNP	7.69693
S3600-THY_vs_S3600-LIVER-resent	chr1	115476650	115476651	GA	G	Dsel-Cntnap5a	n.115476651delA	intergenic_region	MODIFIER	intergenic_region	34	1	0.029	22	22	1	DELETION.NumRepetitions_10orMore.EventLength_1.RepeatExpansion_A	6.1215
S3600-THY_vs_S3600-LIVER-resent	chr1	115503246	115503246	T	TAA	Dsel-Cntnap5a	n.115503246_115503247insAA	intergenic_region	MODIFIER	intergenic_region	49	14	0	80	80	1	INSERTION.NumRepetitions_10orMore.EventLength_1.RepeatExpansion_A	5.90737
S3600-THY_vs_S3600-LIVER-resent	chr1	115528304	115528308	TATAC	T	Dsel-Cntnap5a	n.115528305_115528308delATAC	intergenic_region	MODIFIER	intergenic_region	22	0	0	19	19	1	DELETION.NumRepetitions_1.EventLength_4	6.13222
S3600-THY_vs_S3600-LIVER-resent	chr1	115556751	115556751	A	G	Dsel-Cntnap5a	n.115556751A>G	intergenic_region	MODIFIER	intergenic_region	52	0	0	84	23	0.277	SNP	5.1868
S3600-THY_vs_S3600-LIVER-resent	chr1	115604776	115604776	A	AT	Dsel-Cntnap5a	n.115604776_115604777insT	intergenic_region	MODIFIER	intergenic_region	50	0	0	11	10	0.929	INSERTION.NOVEL_1.Novel_T	7.51403
S3600-THY_vs_S3600-LIVER-resent	chr1	115604777	115604777	A	ATATATATATATATATATATATAT	Dsel-Cntnap5a	n.115604777_115604778insTATATATATATATATATATATAT	intergenic_region	MODIFIER	intergenic_region	51	0	0	10	9	0.929	INSERTION.NOVEL_10orMore	6.87642
S3600-THY_vs_S3600-LIVER-resent	chr1	115643394	115643394	A	ACC	Dsel-Cntnap5a	n.115643394_115643395insCC	intergenic_region	MODIFIER	intergenic_region	10	0	0.091	25	24	0.96	INSERTION.NumRepetitions_10orMore.EventLength_1.RepeatExpansion_C	7.22243
S3600-THY_vs_S3600-LIVER-resent	chr1	115743103	115743103	C	G	Cntnap5a	c.82+57885C>G	intron_variant	MODIFIER	transcript	48	0	0	74	33	0.438	SNP	6.0866
S3600-THY_vs_S3600-LIVER-resent	chr1	115744495	115744495	G	GGTGTGT	Cntnap5a	c.82+59277_82+59278insGTGTGT	intron_variant	MODIFIER	transcript	16	3	0	9	9	1	INSERTION.NumRepetitions_10orMore.EventLength_2.RepeatExpansion_GT	3.96784
S3600-THY_vs_S3600-LIVER-resent	chr1	115840283	115840283	G	GAT	Cntnap5a	c.83-60647_83-60646insAT	intron_variant	MODIFIER	transcript	11	0	0	10	8	0.8	INSERTION.NumRepetitions_4.EventLength_2.RepeatExpansion_AT	3.65533
S3600-THY_vs_S3600-LIVER-resent	chr1	115881910	115881910	G	GAAAAAAAAAA	Cntnap5a	c.83-19020_83-19019insAAAAAAAAAA	intron_variant	MODIFIER	transcript	55	7	0	35	35	1	INSERTION.NumRepetitions_8.EventLength_1.RepeatExpansion_A	6.0148
S3600-THY_vs_S3600-LIVER-resent	chr1	115991328	115991328	G	GGAGA	Cntnap5a	c.382-68794_382-68793insGAGA	intron_variant	MODIFIER	transcript	9	0	0	7	7	1	INSERTION.NumRepetitions_10orMore.EventLength_2.RepeatExpansion_GA	4.05843
S3600-THY_vs_S3600-LIVER-resent	chr1	116203162	116203162	G	GGTGTGTGTGTGTGT	Cntnap5a	c.1646+14727_1646+14728insGTGTGTGTGTGTGT	intron_variant	MODIFIER	transcript	29	0	0	27	24	0.909	INSERTION.NumRepetitions_10orMore.EventLength_2.RepeatExpansion_GT	6.4148
S3600-THY_vs_S3600-LIVER-resent	chr1	116369718	116369718	T	TTCTCTCTCTCTCTCTCTCTCTCTCTCTCTC	Cntnap5a	c.2075-42369_2075-42368insTCTCTCTCTCTCTCTCTCTCTCTCTCTCTC	intron_variant	MODIFIER	transcript	14	0	0.067	5	5	1	INSERTION.NumRepetitions_10orMore.EventLength_2.RepeatExpansion_TC	4.06551
S3600-THY_vs_S3600-LIVER-resent	chr1	116374519	116374519	G	GTT	Cntnap5a	c.2075-37568_2075-37567insTT	intron_variant	MODIFIER	transcript	28	6	0	34	34	1	INSERTION.NumRepetitions_10orMore.EventLength_1.RepeatExpansion_T	6.08345
S3600-THY_vs_S3600-LIVER-resent	chr1	116508425	116508425	C	G	Cntnap5a	c.3215-9688C>G	intron_variant	MODIFIER	transcript	50	0	0	81	49	0.595	SNP	5.69032
S3600-THY_vs_S3600-LIVER-resent	chr1	116954320	116954320	C	G	Cntnap5a-Tsn	n.116954320C>G	intergenic_region	MODIFIER	intergenic_region	67	0	0	108	46	0.419	SNP	6.04823
S3600-THY_vs_S3600-LIVER-resent	chr1	117046521	117046527	AAACAAC	A	Cntnap5a-Tsn	n.117046522_117046527delAACAAC	intergenic_region	MODIFIER	intergenic_region	36	1	0.028	19	14	0.737	DELETION.NumRepetitions_8.EventLength_3	7.44973
S3600-THY_vs_S3600-LIVER-resent	chr1	117197990	117197990	T	TTCTCTCTCTCTC	Cntnap5a-Tsn	n.117197990_117197991insTCTCTCTCTCTC	intergenic_region	MODIFIER	intergenic_region	15	0	0	6	6	1	INSERTION.NumRepetitions_10orMore.EventLength_2.RepeatExpansion_TC	4.73451
S3600-THY_vs_S3600-LIVER-resent	chr1	117234296	117234307	GCCTAAGACTGA	G	Cntnap5a-Tsn	n.117234297_117234307delCCTAAGACTGA	intergenic_region	MODIFIER	intergenic_region	54	1	0.019	5	5	1	DELETION.NumRepetitions_1.EventLength_10orMore	5.92137
S3600-THY_vs_S3600-LIVER-resent	chr1	117778728	117778728	C	G	Cntnap5a-Tsn	n.117778728C>G	intergenic_region	MODIFIER	intergenic_region	29	0	0	98	48	0.49	SNP	6.45399
S3600-THY_vs_S3600-LIVER-resent	chr1	117960098	117960098	C	G	Cntnap5a-Tsn	n.117960098C>G	intergenic_region	MODIFIER	intergenic_region	60	0	0	187	48	0.259	SNP	6.13072
S3600-THY_vs_S3600-LIVER-resent	chr1	117968766	117968766	C	G	Cntnap5a-Tsn	n.117968766C>G	intergenic_region	MODIFIER	intergenic_region	49	0	0	99	44	0.454	SNP	6.11654
S3600-THY_vs_S3600-LIVER-resent	chr1	118045437	118045437	C	G	Cntnap5a-Tsn	n.118045437C>G	intergenic_region	MODIFIER	intergenic_region	64	0	0	93	49	0.522	SNP	5.85419
S3600-THY_vs_S3600-LIVER-resent	chr1	118068060	118068060	C	G	Cntnap5a-Tsn	n.118068060C>G	intergenic_region	MODIFIER	intergenic_region	28	0	0	59	32	0.552	SNP	6.1928
S3600-THY_vs_S3600-LIVER-resent	chr1	118089579	118089579	C	G	Cntnap5a-Tsn	n.118089579C>G	intergenic_region	MODIFIER	intergenic_region	67	1	0.015	104	43	0.417	SNP	5.78054
S3600-THY_vs_S3600-LIVER-resent	chr1	118159122	118159122	C	G	Cntnap5a-Tsn	n.118159122C>G	intergenic_region	MODIFIER	intergenic_region	57	0	0	99	46	0.464	SNP	5.92257
S3600-THY_vs_S3600-LIVER-resent	chr1	118174641	118174644	TGGG	T	Cntnap5a-Tsn	n.118174642_118174644delGGG	intergenic_region	MODIFIER	intergenic_region	16	1	0.063	34	32	0.941	DELETION.NumRepetitions_10orMore.EventLength_1.RepeatExpansion_G	7.13173
S3600-THY_vs_S3600-LIVER-resent	chr1	118340318	118340322	AAAGG	A	Nifk-Clasp1	n.118340319_118340322delAAGG	intergenic_region	MODIFIER	intergenic_region	8	0	0	5	5	1	DELETION.NumRepetitions_1.EventLength_4	3.10958
S3600-THY_vs_S3600-LIVER-resent	chr1	118392350	118392350	A	AT	Clasp1	c.-285+2829_-285+2830insT	intron_variant	MODIFIER	transcript	70	0	0	7	5	0.714	INSERTION.NumRepetitions_10orMore.EventLength_1.RepeatExpansion_T	5.97352
S3600-THY_vs_S3600-LIVER-resent	chr1	118457781	118457781	C	A	2900060B14Rik	n.*888G>T	downstream_gene_variant	MODIFIER	transcript	114	0	0	114	42	0.368	SNP	5.71633
S3600-THY_vs_S3600-LIVER-resent	chr1	118518258	118518258	C	G	Clasp1	c.1937-3569C>G	intron_variant	MODIFIER	transcript	97	0	0	105	54	0.51	SNP	6.34743
S3600-THY_vs_S3600-LIVER-resent	chr1	118604112	118604112	G	T	Clasp1	c.4572+1631G>T	intron_variant	MODIFIER	transcript	9	0	0	33	33	1	SNP	6.17501
S3600-THY_vs_S3600-LIVER-resent	chr1	118753836	118753836	T	C	Tfcp2l1-Gli2	n.118753836T>C	intergenic_region	MODIFIER	intergenic_region	44	1	0.023	83	81	0.976	SNP	6.32025
S3600-THY_vs_S3600-LIVER-resent	chr1	118774433	118774433	G	A	Tfcp2l1-Gli2	n.118774433G>A	intergenic_region	MODIFIER	intergenic_region	35	1	0	15	9	1	SNP	4.76081
S3600-THY_vs_S3600-LIVER-resent	chr1	118838540	118838540	C	G	Gli2	c.2243-363G>C	intron_variant	MODIFIER	transcript	65	0	0	99	60	0.602	SNP	6.00965
S3600-THY_vs_S3600-LIVER-resent	chr1	118955358	118955358	C	G	Mir6346	n.*1059C>G	downstream_gene_variant	MODIFIER	transcript	70	0	0	108	52	0.486	SNP	5.82421
S3600-THY_vs_S3600-LIVER-resent	chr1	118968078	118968078	C	G	Gli2	c.136+33962G>C	intron_variant	MODIFIER	transcript	79	0	0	93	45	0.484	SNP	5.82409
S3600-THY_vs_S3600-LIVER-resent	chr1	119040728	119040728	G	C	Gli2	c.-32+12574C>G	intron_variant	MODIFIER	transcript	57	0	0	101	45	0.444	SNP	6.03412
S3600-THY_vs_S3600-LIVER-resent	chr1	119114600	119114600	A	T	Gli2-Inhbb	n.119114600A>T	intergenic_region	MODIFIER	intergenic_region	20	0	0	13	12	0.929	SNP	7.43606
S3600-THY_vs_S3600-LIVER-resent	chr1	119143317	119143317	T	TCTCTCTCTCTCTCTCTCTCTCA	Gli2-Inhbb	n.119143317_119143318insCTCTCTCTCTCTCTCTCTCTCA	intergenic_region	MODIFIER	intergenic_region	25	0	0	19	19	1	INSERTION.NOVEL_10orMore	6.78926
S3600-THY_vs_S3600-LIVER-resent	chr1	119165466	119165466	C	G	Gli2-Inhbb	n.119165466C>G	intergenic_region	MODIFIER	intergenic_region	61	0	0	98	44	0.449	SNP	5.94664
S3600-THY_vs_S3600-LIVER-resent	chr1	119184075	119184075	C	G	Gli2-Inhbb	n.119184075C>G	intergenic_region	MODIFIER	intergenic_region	64	1	0.016	86	39	0.453	SNP	6.26164
S3600-THY_vs_S3600-LIVER-resent	chr1	119197304	119197304	C	G	Gli2-Inhbb	n.119197304C>G	intergenic_region	MODIFIER	intergenic_region	80	0	0	118	58	0.492	SNP	5.92501
S3600-THY_vs_S3600-LIVER-resent	chr1	119208942	119208942	C	G	Gli2-Inhbb	n.119208942C>G	intergenic_region	MODIFIER	intergenic_region	56	0	0	103	48	0.465	SNP	5.86334
S3600-THY_vs_S3600-LIVER-resent	chr1	119211658	119211658	C	G	Gli2-Inhbb	n.119211658C>G	intergenic_region	MODIFIER	intergenic_region	76	0	0	135	58	0.424	SNP	6.09286
S3600-THY_vs_S3600-LIVER-resent	chr1	119305405	119305405	C	G	Gli2-Inhbb	n.119305405C>G	intergenic_region	MODIFIER	intergenic_region	76	0	0	99	48	0.485	SNP	5.91367
S3600-THY_vs_S3600-LIVER-resent	chr1	119360188	119360188	C	G	Gli2-Inhbb	n.119360188C>G	intergenic_region	MODIFIER	intergenic_region	58	0	0	87	37	0.419	SNP	6.31757
S3600-THY_vs_S3600-LIVER-resent	chr1	119365986	119365986	C	G	Gli2-Inhbb	n.119365986C>G	intergenic_region	MODIFIER	intergenic_region	71	0	0	116	50	0.439	SNP	6.00779
S3600-THY_vs_S3600-LIVER-resent	chr1	119367592	119367592	C	T	Gli2-Inhbb	n.119367592C>T	intergenic_region	MODIFIER	intergenic_region	64	1	0.016	107	51	0.476	SNP	6.00285
S3600-THY_vs_S3600-LIVER-resent	chr1	119387680	119387680	C	G	Gli2-Inhbb	n.119387680C>G	intergenic_region	MODIFIER	intergenic_region	65	0	0	106	59	0.557	SNP	5.97455
S3600-THY_vs_S3600-LIVER-resent	chr1	119420532	119420532	C	G	Inhbb	c.460+95G>C	intron_variant	MODIFIER	transcript	87	0	0	106	52	0.49	SNP	6.25188
S3600-THY_vs_S3600-LIVER-resent	chr1	119465895	119465895	C	G	Ralb	c.*5811G>C	downstream_gene_variant	MODIFIER	transcript	48	0	0	82	37	0.451	SNP	5.79671
S3600-THY_vs_S3600-LIVER-resent	chr1	119474449	119474449	C	G	Ralb	c.501+1446G>C	intron_variant	MODIFIER	transcript	74	0	0	98	42	0.429	SNP	5.77963
S3600-THY_vs_S3600-LIVER-resent	chr1	119523217	119523217	C	G	Tmem185b	c.-3294C>G	upstream_gene_variant	MODIFIER	transcript	40	1	0.025	49	20	0.408	SNP	4.99057
S3600-THY_vs_S3600-LIVER-resent	chr1	119523965	119523965	C	G	Tmem185b	c.-2546C>G	upstream_gene_variant	MODIFIER	transcript	99	0	0	100	46	0.449	SNP	6.27992
S3600-THY_vs_S3600-LIVER-resent	chr1	119527256	119527256	C	G	Tmem185b	c.746C>G	missense_variant	MODERATE	transcript	82	0	0	103	57	0.559	SNP	6.02013
S3600-THY_vs_S3600-LIVER-resent	chr1	119573009	119573029	GGAAGGAAGGAAGGAAAGAAA	G	Epb41l5	c.1499-126_1499-107delTTTCTTTCCTTCCTTCCTTC	intron_variant	MODIFIER	transcript	10	0	0	11	10	0.909	DELETION.NumRepetitions_1.EventLength_10orMore	4.46824
S3600-THY_vs_S3600-LIVER-resent	chr1	119693439	119693439	C	G	Ptpn4	c.1356-530G>C	intron_variant	MODIFIER	transcript	81	0	0	97	53	0.546	SNP	5.91632
S3600-THY_vs_S3600-LIVER-resent	chr1	119705409	119705409	C	G	Ptpn4	c.1355+746G>C	intron_variant	MODIFIER	transcript	67	1	0.015	113	53	0.469	SNP	5.84662
S3600-THY_vs_S3600-LIVER-resent	chr1	119844239	119844239	A	AACAC	Ptpn4-Tmem177	n.119844239_119844240insACAC	intergenic_region	MODIFIER	intergenic_region	8	0	0	17	17	1	INSERTION.NumRepetitions_10orMore.EventLength_2.RepeatExpansion_AC	6.03406
S3600-THY_vs_S3600-LIVER-resent	chr1	119873355	119873355	C	G	Ptpn4-Tmem177	n.119873355C>G	intergenic_region	MODIFIER	intergenic_region	89	0	0	96	49	0.495	SNP	5.73384
S3600-THY_vs_S3600-LIVER-resent	chr1	119873617	119873617	A	ATCTCTCTCTCTCTCTCTCTC	Ptpn4-Tmem177	n.119873617_119873618insTCTCTCTCTCTCTCTCTCTC	intergenic_region	MODIFIER	intergenic_region	57	0	0.034	13	12	0.955	INSERTION.NumRepetitions_10orMore.EventLength_2.RepeatExpansion_TC	7.36328
S3600-THY_vs_S3600-LIVER-resent	chr1	120054598	120054598	C	G	Sctr	c.963+257C>G	intron_variant	MODIFIER	transcript	79	0	0	116	53	0.442	SNP	5.92033
S3600-THY_vs_S3600-LIVER-resent	chr1	120080422	120080422	C	G	Tmem37-Dbi	n.120080422C>G	intergenic_region	MODIFIER	intergenic_region	68	0	0	129	60	0.465	SNP	5.84725
S3600-THY_vs_S3600-LIVER-resent	chr1	120144033	120144112	AATTTGTGCTCTGCTATTGAGTTCAATCTCCATACAAGGTGCCTACCTTTGGAAGGTCCCACAGCCCTTCCCTACGCTGT	A	3110009E18Rik	c.-12-6569_-12-6491delATTTGTGCTCTGCTATTGAGTTCAATCTCCATACAAGGTGCCTACCTTTGGAAGGTCCCACAGCCCTTCCCTACGCTGT	intron_variant	MODIFIER	transcript	33	0	0	15	15	1	DELETION.NOVEL_10orMore	7.29103
S3600-THY_vs_S3600-LIVER-resent	chr1	120155883	120155883	C	CTCTCTGTGTGTG	3110009E18Rik	c.134-4723_134-4722insTCTCTGTGTGTG	intron_variant	MODIFIER	transcript	17	1	0	11	11	1	INSERTION.NOVEL_10orMore	6.25274
S3600-THY_vs_S3600-LIVER-resent	chr1	120248917	120248917	C	G	Steap3	c.-8-4650G>C	intron_variant	MODIFIER	transcript	107	0	0	109	55	0.505	SNP	6.08774
S3600-THY_vs_S3600-LIVER-resent	chr1	120301259	120301275	TTATGTATGTATGTATG	T	Steap3-C1ql2	n.120301260_120301275delTATGTATGTATGTATG	intergenic_region	MODIFIER	intergenic_region	57	1	0.018	17	16	0.941	DELETION.NumRepetitions_9.EventLength_4	7.37836
S3600-THY_vs_S3600-LIVER-resent	chr1	120310173	120310173	C	G	Steap3-C1ql2	n.120310173C>G	intergenic_region	MODIFIER	intergenic_region	75	0	0	115	56	0.487	SNP	6.23364
S3600-THY_vs_S3600-LIVER-resent	chr1	120596248	120596248	C	G	Marco-En1	n.120596248C>G	intergenic_region	MODIFIER	intergenic_region	65	0	0	92	43	0.462	SNP	6.36594
S3600-THY_vs_S3600-LIVER-resent	chr1	120858758	120858758	C	G	En1-Celrr	n.120858758C>G	intergenic_region	MODIFIER	intergenic_region	57	1	0.018	95	47	0.495	SNP	5.79654
S3600-THY_vs_S3600-LIVER-resent	chr1	120975253	120975253	G	GTCTCTCTCTCTC	En1-Celrr	n.120975253_120975254insTCTCTCTCTCTC	intergenic_region	MODIFIER	intergenic_region	19	0	0	8	8	1	INSERTION.NumRepetitions_10orMore.EventLength_2.RepeatExpansion_TC	6.34637
S3600-THY_vs_S3600-LIVER-resent	chr1	121120709	121120709	C	G	Celrr	n.1314C>G	non_coding_transcript_exon_variant	MODIFIER	transcript	57	0	0	108	54	0.495	SNP	5.85882
S3600-THY_vs_S3600-LIVER-resent	chr1	121323198	121323198	C	G	Insig2	c.-65-3293G>C	intron_variant	MODIFIER	transcript	79	0	0	141	71	0.504	SNP	5.94218
S3600-THY_vs_S3600-LIVER-resent	chr1	121354807	121354807	C	G	Insig2-Ccdc93	n.121354807C>G	intergenic_region	MODIFIER	intergenic_region	66	0	0	130	63	0.485	SNP	6.14883
S3600-THY_vs_S3600-LIVER-resent	chr1	121408306	121408306	C	G	Insig2-Ccdc93	n.121408306C>G	intergenic_region	MODIFIER	intergenic_region	80	1	0.013	123	56	0.451	SNP	5.96112
S3600-THY_vs_S3600-LIVER-resent	chr1	121419835	121419835	C	G	Insig2-Ccdc93	n.121419835C>G	intergenic_region	MODIFIER	intergenic_region	62	0	0	105	53	0.495	SNP	5.6945
S3600-THY_vs_S3600-LIVER-resent	chr1	121444552	121444552	C	G	Ccdc93	c.364-1088C>G	intron_variant	MODIFIER	transcript	81	0	0	108	42	0.383	SNP	6.01481
S3600-THY_vs_S3600-LIVER-resent	chr1	121587446	121587446	C	G	Ddx18-Dpp10	n.121587446C>G	intergenic_region	MODIFIER	intergenic_region	45	0	0	103	52	0.505	SNP	6.27922
S3600-THY_vs_S3600-LIVER-resent	chr1	121610127	121610151	GAGGGAGAGGGAGAGGGAGAGGGAT	G	Ddx18-Dpp10	n.121610128_121610151delAGGGAGAGGGAGAGGGAGAGGGAT	intergenic_region	MODIFIER	intergenic_region	8	0	0	13	13	1	DELETION.NumRepetitions_1.EventLength_10orMore	5.30854
S3600-THY_vs_S3600-LIVER-resent	chr1	121615248	121615248	C	G	Ddx18-Dpp10	n.121615248C>G	intergenic_region	MODIFIER	intergenic_region	52	0	0	99	39	0.381	SNP	6.4923
S3600-THY_vs_S3600-LIVER-resent	chr1	121643584	121643584	C	G	Ddx18-Dpp10	n.121643584C>G	intergenic_region	MODIFIER	intergenic_region	52	0	0	109	51	0.472	SNP	6.358
S3600-THY_vs_S3600-LIVER-resent	chr1	121982490	121982490	G	GAA	Ddx18-Dpp10	n.121982490_121982491insAA	intergenic_region	MODIFIER	intergenic_region	48	10	0	85	85	1	INSERTION.NumRepetitions_10orMore.EventLength_1.RepeatExpansion_A	6.1346
S3600-THY_vs_S3600-LIVER-resent	chr1	122015656	122015656	T	TCTCCTCCTCCTCCTCCTC	Ddx18-Dpp10	n.122015656_122015657insCTCCTCCTCCTCCTCCTC	intergenic_region	MODIFIER	intergenic_region	12	0	0	8	7	0.938	INSERTION.NumRepetitions_10orMore.EventLength_3	3.98632
S3600-THY_vs_S3600-LIVER-resent	chr1	122239207	122239207	C	CTTT	Ddx18-Dpp10	n.122239207_122239208insTTT	intergenic_region	MODIFIER	intergenic_region	58	10	0	74	74	1	INSERTION.NumRepetitions_10orMore.EventLength_1.RepeatExpansion_T	5.82425
S3600-THY_vs_S3600-LIVER-resent	chr1	122357320	122357320	G	C	Ddx18-Dpp10	n.122357320G>C	intergenic_region	MODIFIER	intergenic_region	64	0	0	104	21	0.204	SNP	4.69229
S3600-THY_vs_S3600-LIVER-resent	chr1	122572012	122572012	A	AAGAGAG	Ddx18-Dpp10	n.122572012_122572013insAGAGAG	intergenic_region	MODIFIER	intergenic_region	14	0	0	15	15	1	INSERTION.NumRepetitions_10orMore.EventLength_2.RepeatExpansion_AG	6.68551
S3600-THY_vs_S3600-LIVER-resent	chr1	122602418	122602418	T	TG	Ddx18-Dpp10	n.122602418_122602419insG	intergenic_region	MODIFIER	intergenic_region	41	5	0	40	40	1	INSERTION.NumRepetitions_9.EventLength_1.RepeatExpansion_G	6.27667
S3600-THY_vs_S3600-LIVER-resent	chr1	123159199	123159199	C	G	Ddx18-Dpp10	n.123159199C>G	intergenic_region	MODIFIER	intergenic_region	65	0	0	90	45	0.5	SNP	6.17183
S3600-THY_vs_S3600-LIVER-resent	chr1	123267042	123267042	C	G	Ddx18-Dpp10	n.123267042C>G	intergenic_region	MODIFIER	intergenic_region	62	1	0.016	76	33	0.44	SNP	6.14632
S3600-THY_vs_S3600-LIVER-resent	chr1	123936871	123936871	T	TGATA	Dpp10	c.73-31696_73-31695insTATC	intron_variant	MODIFIER	transcript	22	0	0	35	14	0.4	INSERTION.NumRepetitions_10orMore.EventLength_4	3.45123
S3600-THY_vs_S3600-LIVER-resent	chr1	124008817	124008817	A	AAGAAGGAGGAGGAGG	Dpp10	c.72+36554_72+36555insCCTCCTCCTCCTTCT	intron_variant	MODIFIER	transcript	10	0	0	6	6	1	INSERTION.NOVEL_10orMore	3.90352
S3600-THY_vs_S3600-LIVER-resent	chr1	124116627	124116627	C	A	Dpp10-Actr3	n.124116627C>A	intergenic_region	MODIFIER	intergenic_region	34	0	0.029	17	17	1	SNP	6.55178
S3600-THY_vs_S3600-LIVER-resent	chr1	124187660	124187660	C	T	Dpp10-Actr3	n.124187660C>T	intergenic_region	MODIFIER	intergenic_region	57	0	0	102	45	0.441	SNP	6.06577
S3600-THY_vs_S3600-LIVER-resent	chr1	124240314	124240314	G	GTATA	Dpp10-Actr3	n.124240314_124240315insTATA	intergenic_region	MODIFIER	intergenic_region	24	0	0	8	6	0.667	INSERTION.NumRepetitions_8.EventLength_2.RepeatExpansion_TA	4.51006
S3600-THY_vs_S3600-LIVER-resent	chr1	124287724	124287724	C	G	Dpp10-Actr3	n.124287724C>G	intergenic_region	MODIFIER	intergenic_region	59	0	0	109	38	0.352	SNP	6.37301
S3600-THY_vs_S3600-LIVER-resent	chr1	124616413	124616413	T	C	Dpp10-Actr3	n.124616413T>C	intergenic_region	MODIFIER	intergenic_region	70	1	0.014	107	45	0.425	SNP	6.37227
S3600-THY_vs_S3600-LIVER-resent	chr1	124693913	124693913	C	T	Dpp10-Actr3	n.124693913C>T	intergenic_region	MODIFIER	intergenic_region	51	1	0.02	110	109	0.991	SNP	5.94907
S3600-THY_vs_S3600-LIVER-resent	chr1	124913797	124913797	C	CACACACACACACACAA	Dpp10-Actr3	n.124913797_124913798insACACACACACACACAA	intergenic_region	MODIFIER	intergenic_region	23	3	0	22	21	0.833	INSERTION.NOVEL_10orMore	6.18237
S3600-THY_vs_S3600-LIVER-resent	chr1	125202324	125202324	C	G	Dpp10-Actr3	n.125202324C>G	intergenic_region	MODIFIER	intergenic_region	52	0	0	85	38	0.446	SNP	5.88378
S3600-THY_vs_S3600-LIVER-resent	chr1	125218915	125218915	T	TCACACACACACACACACA	Dpp10-Actr3	n.125218915_125218916insCACACACACACACACACA	intergenic_region	MODIFIER	intergenic_region	19	0	0.05	8	8	1	INSERTION.NumRepetitions_10orMore.EventLength_2.RepeatExpansion_CA	6.34637
S3600-THY_vs_S3600-LIVER-resent	chr1	125224858	125224858	C	G	Dpp10-Actr3	n.125224858C>G	intergenic_region	MODIFIER	intergenic_region	44	0	0	110	50	0.455	SNP	6.1052
S3600-THY_vs_S3600-LIVER-resent	chr1	125264083	125264083	C	A	Dpp10-Actr3	n.125264083C>A	intergenic_region	MODIFIER	intergenic_region	65	0	0	116	50	0.43	SNP	6.23482
S3600-THY_vs_S3600-LIVER-resent	chr1	125280139	125280139	C	G	Dpp10-Actr3	n.125280139C>G	intergenic_region	MODIFIER	intergenic_region	66	0	0	90	45	0.5	SNP	6.08669
S3600-THY_vs_S3600-LIVER-resent	chr1	125291495	125291495	C	G	Dpp10-Actr3	n.125291495C>G	intergenic_region	MODIFIER	intergenic_region	66	0	0	101	52	0.52	SNP	5.92707
S3600-THY_vs_S3600-LIVER-resent	chr1	125300545	125300545	G	A	Dpp10-Actr3	n.125300545G>A	intergenic_region	MODIFIER	intergenic_region	27	0	0	17	11	0.684	SNP	5.79218
S3600-THY_vs_S3600-LIVER-resent	chr1	125345598	125345598	G	C	Dpp10-Actr3	n.125345598G>C	intergenic_region	MODIFIER	intergenic_region	59	0	0	116	63	0.543	SNP	5.71082
S3600-THY_vs_S3600-LIVER-resent	chr1	125371854	125371854	C	G	Dpp10-Actr3	n.125371854C>G	intergenic_region	MODIFIER	intergenic_region	65	0	0	88	39	0.443	SNP	5.88029
S3600-THY_vs_S3600-LIVER-resent	chr1	125419407	125419407	C	G	Actr3	c.45-1103G>C	intron_variant	MODIFIER	transcript	80	0	0	127	57	0.449	SNP	6.02313
S3600-THY_vs_S3600-LIVER-resent	chr1	125507543	125507543	T	TCTTCTCTTCTCTTCTCTTCTCTTCCCTTCC	Actr3-Slc35f5	n.125507543_125507544insCTTCTCTTCTCTTCTCTTCTCTTCCCTTCC	intergenic_region	MODIFIER	intergenic_region	11	0	0	5	5	1	INSERTION.NOVEL_10orMore	3.64028
S3600-THY_vs_S3600-LIVER-resent	chr1	125560379	125560379	C	G	Slc35f5	c.-866C>G	upstream_gene_variant	MODIFIER	transcript	67	1	0.015	121	50	0.412	SNP	6.06486
S3600-THY_vs_S3600-LIVER-resent	chr1	125606391	125606391	C	G	Slc35f5-Gpr39	n.125606391C>G	intergenic_region	MODIFIER	intergenic_region	65	0	0	110	59	0.537	SNP	5.98232
S3600-THY_vs_S3600-LIVER-resent	chr1	125622280	125622280	A	AGTGTGTGT	Slc35f5-Gpr39	n.125622280_125622281insGTGTGTGT	intergenic_region	MODIFIER	intergenic_region	14	0	0	21	21	1	INSERTION.NumRepetitions_10orMore.EventLength_2.RepeatExpansion_GT	6.89566
S3600-THY_vs_S3600-LIVER-resent	chr1	125701978	125701978	C	G	Gpr39	c.856+23786C>G	intron_variant	MODIFIER	transcript	82	0	0	113	56	0.491	SNP	5.98876
S3600-THY_vs_S3600-LIVER-resent	chr1	125742834	125742834	C	G	Gpr39	c.856+64642C>G	intron_variant	MODIFIER	transcript	62	0	0	102	51	0.51	SNP	6.21911
S3600-THY_vs_S3600-LIVER-resent	chr1	125749931	125749931	C	G	Gpr39	c.856+71739C>G	intron_variant	MODIFIER	transcript	52	0	0	79	40	0.5	SNP	6.21189
S3600-THY_vs_S3600-LIVER-resent	chr1	125781012	125781012	C	G	Gpr39	c.857-91358C>G	intron_variant	MODIFIER	transcript	26	0	0	51	28	0.549	SNP	6.34801
S3600-THY_vs_S3600-LIVER-resent	chr1	125781444	125781444	C	G	Gpr39	c.857-90926C>G	intron_variant	MODIFIER	transcript	64	0	0	96	45	0.479	SNP	5.76178
S3600-THY_vs_S3600-LIVER-resent	chr1	125785858	125785858	C	G	Gpr39	c.857-86512C>G	intron_variant	MODIFIER	transcript	71	0	0	104	51	0.485	SNP	6.33005
S3600-THY_vs_S3600-LIVER-resent	chr1	125800157	125800157	C	G	Gpr39	c.857-72213C>G	intron_variant	MODIFIER	transcript	78	0	0	102	49	0.495	SNP	5.89934
S3600-THY_vs_S3600-LIVER-resent	chr1	126006634	126006634	C	G	Nckap5	c.4999+7937G>C	intron_variant	MODIFIER	transcript	90	0	0	101	50	0.495	SNP	5.93724
S3600-THY_vs_S3600-LIVER-resent	chr1	126375115	126375115	G	GTGTGTGTGTGTGTGTA	Nckap5	c.341+6936_341+6937insTACACACACACACACA	intron_variant	MODIFIER	transcript	35	0	0	24	23	0.958	INSERTION.NOVEL_10orMore	6.66335
S3600-THY_vs_S3600-LIVER-resent	chr1	126471861	126471873	CAGAGAGAGAGAG	C	Nckap5	c.144-23356_144-23345delCTCTCTCTCTCT	intron_variant	MODIFIER	transcript	17	0	0	9	9	1	DELETION.NumRepetitions_10orMore.EventLength_2.RepeatExpansion_AG	6.49479
S3600-THY_vs_S3600-LIVER-resent	chr1	126589352	126589362	GGAGGGGAGGA	G	Nckap5	c.70-60607_70-60598delTCCTCCCCTC	intron_variant	MODIFIER	transcript	13	0	0	17	16	0.889	DELETION.NumRepetitions_1.EventLength_10orMore	6.93218
S3600-THY_vs_S3600-LIVER-resent	chr1	126840388	126840388	C	G	Nckap5-Mgat5	n.126840388C>G	intergenic_region	MODIFIER	intergenic_region	85	0	0	124	62	0.5	SNP	6.31802
S3600-THY_vs_S3600-LIVER-resent	chr1	126889004	126889004	C	G	Nckap5-Mgat5	n.126889004C>G	intergenic_region	MODIFIER	intergenic_region	72	0	0	118	55	0.457	SNP	5.97131
S3600-THY_vs_S3600-LIVER-resent	chr1	126932193	126932193	C	G	Nckap5-Mgat5	n.126932193C>G	intergenic_region	MODIFIER	intergenic_region	56	0	0	107	60	0.557	SNP	5.88669
S3600-THY_vs_S3600-LIVER-resent	chr1	126984521	126984521	C	G	Nckap5-Mgat5	n.126984521C>G	intergenic_region	MODIFIER	intergenic_region	69	0	0	97	44	0.453	SNP	5.72215
S3600-THY_vs_S3600-LIVER-resent	chr1	127033307	127033307	C	G	Nckap5-Mgat5	n.127033307C>G	intergenic_region	MODIFIER	intergenic_region	78	0	0	115	58	0.509	SNP	5.98206
S3600-THY_vs_S3600-LIVER-resent	chr1	127122991	127122991	C	G	Nckap5-Mgat5	n.127122991C>G	intergenic_region	MODIFIER	intergenic_region	49	0	0	85	40	0.471	SNP	6.42822
S3600-THY_vs_S3600-LIVER-resent	chr1	127212150	127212150	C	G	Mgat5	c.-193+6723C>G	intron_variant	MODIFIER	transcript	84	0	0	109	44	0.407	SNP	6.24265
S3600-THY_vs_S3600-LIVER-resent	chr1	127284663	127284663	C	G	Mgat5	c.-142-21971C>G	intron_variant	MODIFIER	transcript	55	1	0.019	89	44	0.494	SNP	6.13081
S3600-THY_vs_S3600-LIVER-resent	chr1	127411280	127411280	C	G	Mgat5	c.1244-847C>G	intron_variant	MODIFIER	transcript	68	0	0	106	51	0.49	SNP	5.98072
S3600-THY_vs_S3600-LIVER-resent	chr1	127471717	127471717	C	G	Mgat5	c.1866+142C>G	intron_variant	MODIFIER	transcript	67	0	0	106	51	0.486	SNP	5.94502
S3600-THY_vs_S3600-LIVER-resent	chr1	127477821	127477821	G	C	Mgat5	c.1867-1644G>C	intron_variant	MODIFIER	transcript	64	0	0	112	50	0.441	SNP	6.23574
S3600-THY_vs_S3600-LIVER-resent	chr1	127597700	127597700	C	G	Tmem163	c.320-44896G>C	intron_variant	MODIFIER	transcript	69	0	0	89	44	0.489	SNP	5.73642
S3600-THY_vs_S3600-LIVER-resent	chr1	127612666	127612666	C	G	Tmem163	c.319+55985G>C	intron_variant	MODIFIER	transcript	57	0	0	142	60	0.426	SNP	5.99734
S3600-THY_vs_S3600-LIVER-resent	chr1	127635537	127635537	C	G	Tmem163	c.319+33114G>C	intron_variant	MODIFIER	transcript	46	1	0.022	95	46	0.484	SNP	6.02711
S3600-THY_vs_S3600-LIVER-resent	chr1	127642088	127642088	C	G	Tmem163	c.319+26563G>C	intron_variant	MODIFIER	transcript	69	1	0.014	116	55	0.482	SNP	5.9922
S3600-THY_vs_S3600-LIVER-resent	chr1	127643711	127643711	C	G	Tmem163	c.319+24940G>C	intron_variant	MODIFIER	transcript	66	0	0	123	51	0.418	SNP	6.13255
S3600-THY_vs_S3600-LIVER-resent	chr1	127657798	127657798	C	G	Tmem163	c.319+10853G>C	intron_variant	MODIFIER	transcript	50	0	0	96	43	0.448	SNP	6.07699
S3600-THY_vs_S3600-LIVER-resent	chr1	127693240	127693240	C	G	Tmem163-Acmsd	n.127693240C>G	intergenic_region	MODIFIER	intergenic_region	76	0	0	101	29	0.287	SNP	6.24083
S3600-THY_vs_S3600-LIVER-resent	chr1	127915223	127915224	TA	T	Rab3gap1	c.749-415delA	intron_variant	MODIFIER	transcript	69	0	0	125	62	0.5	DELETION.NumRepetitions_8.EventLength_1.RepeatExpansion_A	6.08416
S3600-THY_vs_S3600-LIVER-resent	chr1	127972160	127972160	A	AAGGAGG	Zranb3	c.2152+786_2152+787insCCTCCT	intron_variant	MODIFIER	transcript	8	0	0	11	11	1	INSERTION.NumRepetitions_10orMore.EventLength_3	4.87842
S3600-THY_vs_S3600-LIVER-resent	chr1	128574075	128574075	T	A	Dars-Cxcr4	n.128574075T>A	intergenic_region	MODIFIER	intergenic_region	53	0	0.019	12	12	1	SNP	7.64324
S3600-THY_vs_S3600-LIVER-resent	chr1	128618420	128618420	C	T	Cxcr4-Thsd7b	n.128618420C>T	intergenic_region	MODIFIER	intergenic_region	77	0	0	98	30	0.306	SNP	6.57455
S3600-THY_vs_S3600-LIVER-resent	chr1	128693326	128693326	T	C	Cxcr4-Thsd7b	n.128693326T>C	intergenic_region	MODIFIER	intergenic_region	42	1	0.024	10	10	1	SNP	6.84395
S3600-THY_vs_S3600-LIVER-resent	chr1	128702000	128702000	C	T	Cxcr4-Thsd7b	n.128702000C>T	intergenic_region	MODIFIER	intergenic_region	75	1	0.014	135	64	0.478	SNP	5.71469
S3600-THY_vs_S3600-LIVER-resent	chr1	128708309	128708309	C	G	Cxcr4-Thsd7b	n.128708309C>G	intergenic_region	MODIFIER	intergenic_region	76	1	0.013	133	59	0.444	SNP	5.92777
S3600-THY_vs_S3600-LIVER-resent	chr1	128923418	128923418	A	AGTGTGT	Cxcr4-Thsd7b	n.128923418_128923419insGTGTGT	intergenic_region	MODIFIER	intergenic_region	13	1	0.077	9	9	1	INSERTION.NumRepetitions_10orMore.EventLength_2.RepeatExpansion_GT	4.69672
S3600-THY_vs_S3600-LIVER-resent	chr1	129069157	129069157	C	G	Cxcr4-Thsd7b	n.129069157C>G	intergenic_region	MODIFIER	intergenic_region	76	0	0	98	40	0.412	SNP	5.93118
S3600-THY_vs_S3600-LIVER-resent	chr1	129136621	129136621	C	CTCTCTCTCTCTG	Cxcr4-Thsd7b	n.129136621_129136622insTCTCTCTCTCTG	intergenic_region	MODIFIER	intergenic_region	8	0	0	6	6	1	INSERTION.NOVEL_10orMore	3.47756
S3600-THY_vs_S3600-LIVER-resent	chr1	129261911	129261911	T	TTCTCTCTCTCTCTCTCTC	Cxcr4-Thsd7b	n.129261911_129261912insTCTCTCTCTCTCTCTCTC	intergenic_region	MODIFIER	intergenic_region	22	0	0	9	8	0.9	INSERTION.NumRepetitions_10orMore.EventLength_2.RepeatExpansion_TC	5.94276
S3600-THY_vs_S3600-LIVER-resent	chr1	129281844	129281844	T	TCTCTCTCTCTCTCTCTCTCACACACA	Thsd7b	c.-35+8244_-35+8245insCTCTCTCTCTCTCTCTCTCACACACA	intron_variant	MODIFIER	transcript	26	0	0	27	9	0.333	INSERTION.NOVEL_10orMore	2.75383
S3600-THY_vs_S3600-LIVER-resent	chr1	129317594	129317594	C	T	Thsd7b	c.-35+43994C>T	intron_variant	MODIFIER	transcript	36	0	0	66	31	0.47	SNP	5.9308
S3600-THY_vs_S3600-LIVER-resent	chr1	129406049	129406049	C	G	Thsd7b	c.-34-24748C>G	intron_variant	MODIFIER	transcript	68	1	0.015	117	53	0.452	SNP	5.77895
S3600-THY_vs_S3600-LIVER-resent	chr1	129684272	129684272	A	C	Thsd7b	c.1723+6026A>C	intron_variant	MODIFIER	transcript	23	0	0	6	5	0.857	SNP	4.2965
S3600-THY_vs_S3600-LIVER-resent	chr1	129904381	129904381	A	AGTGTGT	Thsd7b	c.2501-11172_2501-11171insGTGTGT	intron_variant	MODIFIER	transcript	76	3	0	19	17	0.333	INSERTION.NumRepetitions_8.EventLength_2.RepeatExpansion_GT	6.44146
S3600-THY_vs_S3600-LIVER-resent	chr1	129949903	129949903	G	GGAGAGAGAGAGAGAGAGAGAGAGAGA	Thsd7b	c.2963-1487_2963-1486insGAGAGAGAGAGAGAGAGAGAGAGAGA	intron_variant	MODIFIER	transcript	22	0	0	9	7	0.882	INSERTION.NumRepetitions_10orMore.EventLength_2.RepeatExpansion_GA	4.86358
S3600-THY_vs_S3600-LIVER-resent	chr1	130018797	130018797	C	G	Thsd7b	c.3141+67229C>G	intron_variant	MODIFIER	transcript	77	1	0.013	104	35	0.34	SNP	5.93024
S3600-THY_vs_S3600-LIVER-resent	chr1	130149292	130149292	A	AC	Thsd7b	c.3427-10282_3427-10281insC	intron_variant	MODIFIER	transcript	27	0	0	47	45	0.958	INSERTION.NumRepetitions_10orMore.EventLength_1.RepeatExpansion_C	6.03101
S3600-THY_vs_S3600-LIVER-resent	chr1	130269529	130269529	C	G	Thsd7b-Cd55b	n.130269529C>G	intergenic_region	MODIFIER	intergenic_region	73	0	0	107	48	0.443	SNP	6.03178
S3600-THY_vs_S3600-LIVER-resent	chr1	130305535	130305540	CGAGAG	C	Thsd7b-Cd55b	n.130305536_130305540delGAGAG	intergenic_region	MODIFIER	intergenic_region	22	1	0	15	15	1	DELETION.NumRepetitions_1.EventLength_5	6.56732
S3600-THY_vs_S3600-LIVER-resent	chr1	130333013	130333013	C	G	Thsd7b-Cd55b	n.130333013C>G	intergenic_region	MODIFIER	intergenic_region	75	0	0	112	56	0.5	SNP	5.81182
S3600-THY_vs_S3600-LIVER-resent	chr1	130337198	130337198	C	G	Thsd7b-Cd55b	n.130337198C>G	intergenic_region	MODIFIER	intergenic_region	79	0	0	100	63	0.626	SNP	6.16764
S3600-THY_vs_S3600-LIVER-resent	chr1	130483319	130483319	A	ATTTTT	Cd55-Zp3r	n.130483319_130483320insTTTTT	intergenic_region	MODIFIER	intergenic_region	60	6	0	82	81	0.5	INSERTION.NumRepetitions_10orMore.EventLength_1.RepeatExpansion_T	6.18247
S3600-THY_vs_S3600-LIVER-resent	chr1	130585600	130585600	C	T	Zp3r	c.1040-2000G>A	intron_variant	MODIFIER	transcript	63	1	0.016	110	50	0.45	SNP	5.79548
S3600-THY_vs_S3600-LIVER-resent	chr1	130612226	130612232	TACATAC	T	Zp3r	c.377+2927_377+2932delGTATGT	intron_variant	MODIFIER	transcript	21	0	0	6	6	1	DELETION.NumRepetitions_1.EventLength_6	5.47131
S3600-THY_vs_S3600-LIVER-resent	chr1	131057427	131057427	G	C	Mapkapk2	c.649+67C>G	intron_variant	MODIFIER	transcript	73	0	0	98	25	0.258	SNP	6.08949
S3600-THY_vs_S3600-LIVER-resent	chr1	131210629	131210629	G	C	Rassf5	c.564+1628C>G	intron_variant	MODIFIER	transcript	82	0	0	129	27	0.209	SNP	6.16237
S3600-THY_vs_S3600-LIVER-resent	chr1	131280552	131280552	G	C	Ikbke	c.-3998C>G	upstream_gene_variant	MODIFIER	transcript	80	0	0	135	44	0.328	SNP	5.99991
S3600-THY_vs_S3600-LIVER-resent	chr1	131289890	131289890	G	C	Srgap2	c.2833-150C>G	intron_variant	MODIFIER	transcript	97	0	0	119	30	0.259	SNP	6.23516
S3600-THY_vs_S3600-LIVER-resent	chr1	131364013	131364013	C	G	Srgap2	c.475G>C	missense_variant	MODERATE	transcript	76	0	0	90	34	0.382	SNP	6.29415
S3600-THY_vs_S3600-LIVER-resent	chr1	131365393	131365393	T	TTCTC	Srgap2	c.424-1330_424-1329insGAGA	intron_variant	MODIFIER	transcript	9	0	0	19	19	1	INSERTION.NumRepetitions_10orMore.EventLength_2.RepeatExpansion_TC	6.83928
S3600-THY_vs_S3600-LIVER-resent	chr1	131447371	131447371	T	TGGGGG	Srgap2	c.68-10505_68-10504insCCCCC	intron_variant	MODIFIER	transcript	44	4	0	39	39	1	INSERTION.NumRepetitions_8.EventLength_1.RepeatExpansion_G	6.05898
S3600-THY_vs_S3600-LIVER-resent	chr1	131543113	131543189	AAAGAAAGAAAGAAAGAAAGAAAGGAAGGAAGGAAGGAAGGAAGGAAGGAAGGAAGGAAGGAAGAAAGGAAGGAAGG	A	Fam72a	c.*4185_*4260delAAGAAAGAAAGAAAGAAAGAAAGGAAGGAAGGAAGGAAGGAAGGAAGGAAGGAAGGAAGGAAGAAAGGAAGGAAGG	downstream_gene_variant	MODIFIER	transcript	50	0	0	13	13	1	DELETION.NOVEL_10orMore	6.26387
S3600-THY_vs_S3600-LIVER-resent	chr1	131735663	131735663	G	C	Rab7b-Slc26a9	n.131735663G>C	intergenic_region	MODIFIER	intergenic_region	108	0	0	103	46	0.451	SNP	5.79551
S3600-THY_vs_S3600-LIVER-resent	chr1	131784035	131784035	G	C	Slc26a9-Pm20d1	n.131784035G>C	intergenic_region	MODIFIER	intergenic_region	68	1	0.015	110	50	0.45	SNP	5.92382
S3600-THY_vs_S3600-LIVER-resent	chr1	131925096	131925096	T	TTGTG	Nucks1	c.229+455_229+456insTGTG	intron_variant	MODIFIER	transcript	20	1	0	20	19	0.941	INSERTION.NumRepetitions_10orMore.EventLength_2.RepeatExpansion_TG	6.27606
S3600-THY_vs_S3600-LIVER-resent	chr1	131945963	131945963	C	G	Nucks1-Slc45a3	n.131945963C>G	intergenic_region	MODIFIER	intergenic_region	48	1	0.021	68	29	0.426	SNP	6.06427
S3600-THY_vs_S3600-LIVER-resent	chr1	132069913	132069913	C	CTTTTTTTTTTTTTTT	Mfsd4a	c.-2022_-2021insAAAAAAAAAAAAAAA	upstream_gene_variant	MODIFIER	transcript	47	1	0.022	18	18	1	INSERTION.NumRepetitions_10orMore.EventLength_1.RepeatExpansion_T	6.40565
S3600-THY_vs_S3600-LIVER-resent	chr1	132075770	132075770	G	A	Mfsd4a-Cdk18	n.132075770G>A	intergenic_region	MODIFIER	intergenic_region	67	0	0	134	65	0.488	SNP	5.94193
S3600-THY_vs_S3600-LIVER-resent	chr1	132111128	132111128	C	G	Cdk18	c.*3808G>C	downstream_gene_variant	MODIFIER	transcript	66	1	0.016	107	33	0.308	SNP	6.15952
S3600-THY_vs_S3600-LIVER-resent	chr1	132189316	132189316	A	ATCTCTCTCTCTCTCTCTCTCTCTCTC	Cdk18-Lemd1	n.132189316_132189317insTCTCTCTCTCTCTCTCTCTCTCTCTC	intergenic_region	MODIFIER	intergenic_region	29	0	0	18	17	0.966	INSERTION.NumRepetitions_10orMore.EventLength_2.RepeatExpansion_TC	6.91192
S3600-THY_vs_S3600-LIVER-resent	chr1	132225715	132225715	T	C	Lemd1	c.-2507T>C	upstream_gene_variant	MODIFIER	transcript	33	0	0	15	15	1	SNP	7.29103
S3600-THY_vs_S3600-LIVER-resent	chr1	132373890	132373890	C	G	Tmcc2	c.732+6767G>C	intron_variant	MODIFIER	transcript	76	0	0	115	51	0.439	SNP	5.76999
S3600-THY_vs_S3600-LIVER-resent	chr1	132421879	132421879	C	G	Dstyk	c.265+4009C>G	intron_variant	MODIFIER	transcript	87	0	0	113	45	0.405	SNP	5.99114
S3600-THY_vs_S3600-LIVER-resent	chr1	132426344	132426344	C	G	Dstyk	c.266-7755C>G	intron_variant	MODIFIER	transcript	93	0	0	120	65	0.538	SNP	5.97664
S3600-THY_vs_S3600-LIVER-resent	chr1	132435014	132435014	C	CTTTTTTTTTTTTTTT	Dstyk	c.654+527_654+528insTTTTTTTTTTTTTTT	intron_variant	MODIFIER	transcript	50	2	0	20	20	1	INSERTION.NumRepetitions_10orMore.EventLength_1.RepeatExpansion_T	7.03364
S3600-THY_vs_S3600-LIVER-resent	chr1	132441858	132441858	C	G	Dstyk	c.654+7371C>G	intron_variant	MODIFIER	transcript	90	0	0	118	64	0.552	SNP	5.74351
S3600-THY_vs_S3600-LIVER-resent	chr1	132444276	132444276	C	G	Dstyk	c.655-5036C>G	intron_variant	MODIFIER	transcript	68	0	0	90	36	0.4	SNP	6.16707
S3600-THY_vs_S3600-LIVER-resent	chr1	132468764	132468764	A	G	Dstyk	c.*5253A>G	downstream_gene_variant	MODIFIER	transcript	46	1	0.022	76	75	0.987	SNP	5.9824
S3600-THY_vs_S3600-LIVER-resent	chr1	132731036	132731036	C	A	Nfasc	c.-200+10635G>T	intron_variant	MODIFIER	transcript	75	0	0	104	55	0.524	SNP	5.88056
S3600-THY_vs_S3600-LIVER-resent	chr1	132736132	132736132	C	G	Gm10538	n.*3306C>G	downstream_gene_variant	MODIFIER	transcript	74	0	0	106	44	0.415	SNP	5.88998
S3600-THY_vs_S3600-LIVER-resent	chr1	133127814	133127814	G	C	Ppp1r15b	c.-3933G>C	upstream_gene_variant	MODIFIER	transcript	80	0	0	134	31	0.235	SNP	5.91046
S3600-THY_vs_S3600-LIVER-resent	chr1	133272151	133272151	G	C	Gm19461	n.-2343C>G	upstream_gene_variant	MODIFIER	transcript	100	0	0	131	40	0.308	SNP	5.97878
S3600-THY_vs_S3600-LIVER-resent	chr1	133357861	133357867	GCGGGGA	G	Ren2	c.753-542_753-537delCGGGGA	intron_variant	MODIFIER	transcript	49	1	0.021	174	36	0.208	DELETION.NumRepetitions_1.EventLength_6	3.06681
S3600-THY_vs_S3600-LIVER-resent	chr1	133457452	133457452	T	TTTTCTG	Sox13-Snrpe	n.133457452_133457453insTTTCTG	intergenic_region	MODIFIER	intergenic_region	59	0	0	8	5	0.625	INSERTION.NOVEL_6	5.23668
S3600-THY_vs_S3600-LIVER-resent	chr1	133885573	133885573	C	CTTTTTTTTTTTTTTTTTT	Atp2b4-Optc	n.133885573_133885574insTTTTTTTTTTTTTTTTTT	intergenic_region	MODIFIER	intergenic_region	47	1	0.021	13	12	0.941	INSERTION.NumRepetitions_10orMore.EventLength_1.RepeatExpansion_T	6.03906
S3600-THY_vs_S3600-LIVER-resent	chr1	133982632	133982632	G	A	Prelp-Fmod	n.133982632G>A	intergenic_region	MODIFIER	intergenic_region	67	1	0.015	29	22	0.71	SNP	6.19091
S3600-THY_vs_S3600-LIVER-resent	chr1	133992759	133992759	G	GTGTTTT	Prelp-Fmod	n.133992759_133992760insTGTTTT	intergenic_region	MODIFIER	intergenic_region	65	11	0.02	66	61	0.25	INSERTION.NOVEL_6	6.20149
S3600-THY_vs_S3600-LIVER-resent	chr1	134114499	134114499	C	CTCTCTCTCTCTCTCTCTCTCTGTG	Chit1	c.-144+3137_-144+3138insTCTCTCTCTCTCTCTCTCTCTGTG	intron_variant	MODIFIER	transcript	45	1	0	8	8	1	INSERTION.NOVEL_10orMore	7.99335
S3600-THY_vs_S3600-LIVER-resent	chr1	134405635	134405635	G	GAAAAAAA	Cyb5r1	c.-404_-403insAAAAAAA	upstream_gene_variant	MODIFIER	transcript	52	1	0.038	14	13	0.944	INSERTION.NumRepetitions_10orMore.EventLength_1.RepeatExpansion_A	6.97682
S3600-THY_vs_S3600-LIVER-resent	chr1	134469700	134469700	G	GGTGC	Klhl12	c.567+1832_567+1833insGTGC	intron_variant	MODIFIER	transcript	73	8	0	102	102	1	INSERTION.NOVEL_4	5.84482
S3600-THY_vs_S3600-LIVER-resent	chr1	134641382	134641382	C	T	Kdm5b-Syt2	n.134641382C>T	intergenic_region	MODIFIER	intergenic_region	61	0	0	10	7	0.7	SNP	7.04463
S3600-THY_vs_S3600-LIVER-resent	chr1	134730486	134730486	T	C	Syt2	c.-17-10349T>C	intron_variant	MODIFIER	transcript	73	1	0.014	13	12	0.923	SNP	6.03867
S3600-THY_vs_S3600-LIVER-resent	chr1	135322406	135322406	A	C	Lmod1	c.-2604A>C	upstream_gene_variant	MODIFIER	transcript	60	0	0	5	5	1	SNP	6.91697
S3600-THY_vs_S3600-LIVER-resent	chr1	135508740	135508740	C	G	Nav1	c.1235+23609G>C	intron_variant	MODIFIER	transcript	63	0	0	110	65	0.593	SNP	5.83299
S3600-THY_vs_S3600-LIVER-resent	chr1	135509009	135509009	C	G	Nav1	c.1235+23340G>C	intron_variant	MODIFIER	transcript	61	0	0	109	54	0.509	SNP	6.02691
S3600-THY_vs_S3600-LIVER-resent	chr1	135601076	135601076	C	G	Nav1-Csrp1	n.135601076C>G	intergenic_region	MODIFIER	intergenic_region	72	0	0	74	28	0.378	SNP	6.50763
S3600-THY_vs_S3600-LIVER-resent	chr1	135601221	135601221	C	G	Nav1-Csrp1	n.135601221C>G	intergenic_region	MODIFIER	intergenic_region	49	0	0	49	24	0.49	SNP	6.8954
S3600-THY_vs_S3600-LIVER-resent	chr1	135609773	135609773	C	G	Nav1-Csrp1	n.135609773C>G	intergenic_region	MODIFIER	intergenic_region	67	0	0	119	53	0.449	SNP	5.92938
S3600-THY_vs_S3600-LIVER-resent	chr1	135630684	135630684	C	G	Nav1-Csrp1	n.135630684C>G	intergenic_region	MODIFIER	intergenic_region	73	0	0	120	57	0.479	SNP	5.84347
S3600-THY_vs_S3600-LIVER-resent	chr1	135860112	135860112	T	TTTCCTTCCTTCCTTCC	Tnnt2-Pkp1	n.135860112_135860113insTTCCTTCCTTCCTTCC	intergenic_region	MODIFIER	intergenic_region	15	0	0	6	6	1	INSERTION.NumRepetitions_10orMore.EventLength_4	4.73451
S3600-THY_vs_S3600-LIVER-resent	chr1	135924022	135924022	C	G	Pkp1	c.-5010G>C	upstream_gene_variant	MODIFIER	transcript	66	0	0	104	55	0.524	SNP	5.80617
S3600-THY_vs_S3600-LIVER-resent	chr1	136083944	136083944	G	GGTGTGTGTGTGTGTGT	Cacna1s	c.1394-271_1394-270insGTGTGTGTGTGTGTGT	intron_variant	MODIFIER	transcript	20	0	0	6	6	1	INSERTION.NumRepetitions_10orMore.EventLength_2.RepeatExpansion_GT	5.36216
S3600-THY_vs_S3600-LIVER-resent	chr1	136233671	136233671	G	C	5730559C18Rik	c.203+232C>G	intron_variant	MODIFIER	transcript	64	1	0.016	93	25	0.269	SNP	4.8928
S3600-THY_vs_S3600-LIVER-resent	chr1	136329269	136329269	C	CAAAAAAAAAAAAAAAAAA	Camsap2	c.140-4274_140-4273insTTTTTTTTTTTTTTTTTT	intron_variant	MODIFIER	transcript	76	2	0	5	5	1	INSERTION.NumRepetitions_10orMore.EventLength_1.RepeatExpansion_A	6.08639
S3600-THY_vs_S3600-LIVER-resent	chr1	136568310	136568310	A	ATATATATATATATATATATATATATATATATATATATATATATATG	Kif14-Zfp281	n.136568310_136568311insTATATATATATATATATATATATATATATATATATATATATATATG	intergenic_region	MODIFIER	intergenic_region	45	1	0	5	5	1	INSERTION.NOVEL_10orMore	5.54793
S3600-THY_vs_S3600-LIVER-resent	chr1	136572859	136572859	G	C	Kif14-Zfp281	n.136572859G>C	intergenic_region	MODIFIER	intergenic_region	78	0	0	113	50	0.45	SNP	6.17526
S3600-THY_vs_S3600-LIVER-resent	chr1	136680880	136680880	A	ACCC	Gm19705	n.-2516_-2515insCCC	upstream_gene_variant	MODIFIER	transcript	54	9	0	61	61	1	INSERTION.NumRepetitions_9.EventLength_1.RepeatExpansion_C	5.96384
S3600-THY_vs_S3600-LIVER-resent	chr1	136708547	136708547	G	C	Platr22	n.285+2905G>C	intron_variant	MODIFIER	transcript	75	0	0	110	54	0.486	SNP	5.95804
S3600-THY_vs_S3600-LIVER-resent	chr1	136732333	136732333	C	CCCTTCCTTCCTTCCTTCCTTCCTT	Platr22-Nr5a2	n.136732333_136732334insCCTTCCTTCCTTCCTTCCTTCCTT	intergenic_region	MODIFIER	intergenic_region	8	0	0	12	12	1	INSERTION.NumRepetitions_10orMore.EventLength_4	5.10027
S3600-THY_vs_S3600-LIVER-resent	chr1	136748114	136748114	G	A	Platr22-Nr5a2	n.136748114G>A	intergenic_region	MODIFIER	intergenic_region	44	1	0.023	6	6	1	SNP	6.35604
S3600-THY_vs_S3600-LIVER-resent	chr1	136752550	136752550	T	TTTC	Platr22-Nr5a2	n.136752550_136752551insTTC	intergenic_region	MODIFIER	intergenic_region	47	1	0.021	19	10	0.526	INSERTION.NumRepetitions_2.EventLength_3	5.38588
S3600-THY_vs_S3600-LIVER-resent	chr1	136985351	136985351	T	TCCC	Nr5a2-Mir181a-1	n.136985351_136985352insCCC	intergenic_region	MODIFIER	intergenic_region	14	0	0	7	7	1	INSERTION.NOVEL_1.Novel_C	5.06551
S3600-THY_vs_S3600-LIVER-resent	chr1	137022745	137022745	C	CAAAAAAAAAAAAA	Nr5a2-Mir181a-1	n.137022745_137022746insAAAAAAAAAAAAA	intergenic_region	MODIFIER	intergenic_region	19	0	0.05	5	5	1	INSERTION.NumRepetitions_10orMore.EventLength_1.RepeatExpansion_A	4.62843
S3600-THY_vs_S3600-LIVER-resent	chr1	137087658	137087658	G	GCACACACACACA	Nr5a2-Mir181a-1	n.137087658_137087659insCACACACACACA	intergenic_region	MODIFIER	intergenic_region	24	0	0	22	22	1	INSERTION.NumRepetitions_10orMore.EventLength_2.RepeatExpansion_CA	6.1427
S3600-THY_vs_S3600-LIVER-resent	chr1	137124711	137124711	C	G	Nr5a2-Mir181a-1	n.137124711C>G	intergenic_region	MODIFIER	intergenic_region	83	0	0	119	52	0.432	SNP	5.86822
S3600-THY_vs_S3600-LIVER-resent	chr1	137169003	137169003	C	CTTTTTTTTTTTTTTTTT	Nr5a2-Mir181a-1	n.137169003_137169004insTTTTTTTTTTTTTTTTT	intergenic_region	MODIFIER	intergenic_region	59	1	0.017	23	22	0.958	INSERTION.NumRepetitions_10orMore.EventLength_1.RepeatExpansion_T	6.17627
S3600-THY_vs_S3600-LIVER-resent	chr1	137183947	137183951	TACAC	T	Nr5a2-Mir181a-1	n.137183948_137183951delACAC	intergenic_region	MODIFIER	intergenic_region	11	0	0	20	17	0.85	DELETION.NumRepetitions_10orMore.EventLength_2.RepeatExpansion_AC	5.36664
S3600-THY_vs_S3600-LIVER-resent	chr1	137355691	137355694	GTTT	G	Nr5a2-Mir181a-1	n.137355692_137355694delTTT	intergenic_region	MODIFIER	intergenic_region	56	11	0	104	100	1	DELETION.NumRepetitions_10orMore.EventLength_1.RepeatExpansion_T	5.80352
S3600-THY_vs_S3600-LIVER-resent	chr1	137519143	137519143	T	C	Nr5a2-Mir181a-1	n.137519143T>C	intergenic_region	MODIFIER	intergenic_region	9	0	0	9	8	1	SNP	3.38578
S3600-THY_vs_S3600-LIVER-resent	chr1	137519145	137519149	TCTCC	T	Nr5a2-Mir181a-1	n.137519146_137519149delCTCC	intergenic_region	MODIFIER	intergenic_region	11	0	0	8	8	0.889	DELETION.NumRepetitions_1.EventLength_4	4.87842
S3600-THY_vs_S3600-LIVER-resent	chr1	137841010	137841010	G	C	Nr5a2-Mir181a-1	n.137841010G>C	intergenic_region	MODIFIER	intergenic_region	61	1	0.016	112	63	0.568	SNP	5.95098
S3600-THY_vs_S3600-LIVER-resent	chr1	138025519	138025519	G	C	Mir181b-1-Ptprc	n.138025519G>C	intergenic_region	MODIFIER	intergenic_region	66	1	0.015	117	56	0.479	SNP	6.09681
S3600-THY_vs_S3600-LIVER-resent	chr1	138040161	138040161	T	C	Mir181b-1-Ptprc	n.138040161T>C	intergenic_region	MODIFIER	intergenic_region	35	1	0.029	22	21	0.955	SNP	6.271
S3600-THY_vs_S3600-LIVER-resent	chr1	138174006	138174006	G	C	Ptprc	c.73+1009C>G	intron_variant	MODIFIER	transcript	86	0	0	137	37	0.261	SNP	5.8463
S3600-THY_vs_S3600-LIVER-resent	chr1	138186729	138186729	G	C	Ptprc-Atp6v1g3	n.138186729G>C	intergenic_region	MODIFIER	intergenic_region	68	0	0	103	21	0.206	SNP	4.81465
S3600-THY_vs_S3600-LIVER-resent	chr1	138208750	138208750	C	G	Ptprc-Atp6v1g3	n.138208750C>G	intergenic_region	MODIFIER	intergenic_region	74	0	0	123	35	0.285	SNP	6.38153
S3600-THY_vs_S3600-LIVER-resent	chr1	138235867	138235867	G	C	Ptprc-Atp6v1g3	n.138235867G>C	intergenic_region	MODIFIER	intergenic_region	70	0	0	118	55	0.466	SNP	6.06962
S3600-THY_vs_S3600-LIVER-resent	chr1	138238344	138238344	T	A	Ptprc-Atp6v1g3	n.138238344T>A	intergenic_region	MODIFIER	intergenic_region	70	1	0.014	121	58	0.475	SNP	5.82921
S3600-THY_vs_S3600-LIVER-resent	chr1	138260345	138260345	C	G	Ptprc-Atp6v1g3	n.138260345C>G	intergenic_region	MODIFIER	intergenic_region	69	0	0	131	29	0.22	SNP	5.617
S3600-THY_vs_S3600-LIVER-resent	chr1	138350257	138350257	G	C	Atp6v1g3-Nek7	n.138350257G>C	intergenic_region	MODIFIER	intergenic_region	74	0	0	148	62	0.422	SNP	5.91758
S3600-THY_vs_S3600-LIVER-resent	chr1	138458649	138458650	CG	C	Atp6v1g3-Nek7	n.138458650delG	intergenic_region	MODIFIER	intergenic_region	61	0	0	112	44	0.387	DELETION.NumRepetitions_1.EventLength_1.RepeatExpansion_G	5.91795
S3600-THY_vs_S3600-LIVER-resent	chr1	138589491	138589491	G	C	Nek7	c.-26-27706C>G	intron_variant	MODIFIER	transcript	90	0	0	110	50	0.455	SNP	5.90729
S3600-THY_vs_S3600-LIVER-resent	chr1	138699149	138699149	C	G	Gm5833-Lhx9	n.138699149C>G	intergenic_region	MODIFIER	intergenic_region	34	1	0.029	62	39	0.623	SNP	6.05266
S3600-THY_vs_S3600-LIVER-resent	chr1	138997456	138997487	CCTCCTCCTCCTCCTCCTCCTCCTCCTCCTTT	C	Dennd1b	c.83-25648_83-25618delCTCCTCCTCCTCCTCCTCCTCCTCCTCCTTT	intron_variant	MODIFIER	transcript	8	0	0	13	13	1	DELETION.NumRepetitions_1.EventLength_10orMore	5.30854
S3600-THY_vs_S3600-LIVER-resent	chr1	139231230	139231230	T	TGG	Crb1	c.4002+433_4002+434insCC	intron_variant	MODIFIER	transcript	81	14	0	104	104	1	INSERTION.NumRepetitions_10orMore.EventLength_1.RepeatExpansion_G	6.26927
S3600-THY_vs_S3600-LIVER-resent	chr1	139267031	139267031	C	G	Crb1	c.1169-17956G>C	intron_variant	MODIFIER	transcript	30	0	0	59	29	0.483	SNP	6.38273
S3600-THY_vs_S3600-LIVER-resent	chr1	139323136	139323136	C	G	Crb1	c.985+91G>C	intron_variant	MODIFIER	transcript	73	0	0	121	55	0.445	SNP	5.97281
S3600-THY_vs_S3600-LIVER-resent	chr1	139326646	139326646	G	GAAGA	Crb1	c.845+1504_845+1505insTCTT	intron_variant	MODIFIER	transcript	39	0	0	24	23	0.958	INSERTION.NumRepetitions_10orMore.EventLength_4	5.89828
S3600-THY_vs_S3600-LIVER-resent	chr1	139620915	139620915	A	G	Cfhr1-Gm4788	n.139620915A>G	intergenic_region	MODIFIER	intergenic_region	45	1	0.022	24	22	0.923	SNP	6.84743
S3600-THY_vs_S3600-LIVER-resent	chr1	140062675	140062675	G	GAA	Cfhr2-Cfh	n.140062675_140062676insAA	intergenic_region	MODIFIER	intergenic_region	26	0	0	5	5	1	INSERTION.NOVEL_1.Novel_A	5.23022
S3600-THY_vs_S3600-LIVER-resent	chr1	140223718	140223726	CTCTCTCTG	C	Cfh-Kcnt2	n.140223719_140223726delTCTCTCTG	intergenic_region	MODIFIER	intergenic_region	11	0	0	6	5	0.833	DELETION.NumRepetitions_1.EventLength_8	3.0134
S3600-THY_vs_S3600-LIVER-resent	chr1	140340029	140340029	T	TCTCTCC	Kcnt2	c.96-11179_96-11178insCTCTCC	intron_variant	MODIFIER	transcript	29	0	0.033	12	11	0.933	INSERTION.NumRepetitions_5.EventLength_6	6.21496
S3600-THY_vs_S3600-LIVER-resent	chr1	140661175	140661175	C	T	4930590L20Rik	n.-4773G>A	upstream_gene_variant	MODIFIER	transcript	63	0	0	115	59	0.522	SNP	6.05682
S3600-THY_vs_S3600-LIVER-resent	chr1	141080032	141080032	C	G	4930590L20Rik-Cdc73	n.141080032C>G	intergenic_region	MODIFIER	intergenic_region	52	0	0	83	33	0.402	SNP	6.08885
S3600-THY_vs_S3600-LIVER-resent	chr1	141118761	141118761	C	G	4930590L20Rik-Cdc73	n.141118761C>G	intergenic_region	MODIFIER	intergenic_region	65	0	0	132	72	0.542	SNP	6.17925
S3600-THY_vs_S3600-LIVER-resent	chr1	141169706	141169706	A	AGTGT	4930590L20Rik-Cdc73	n.141169706_141169707insGTGT	intergenic_region	MODIFIER	intergenic_region	15	0	0	11	11	1	INSERTION.NumRepetitions_10orMore.EventLength_2.RepeatExpansion_GT	6.88796
S3600-THY_vs_S3600-LIVER-resent	chr1	141180590	141180590	C	G	4930590L20Rik-Cdc73	n.141180590C>G	intergenic_region	MODIFIER	intergenic_region	68	1	0.015	100	52	0.515	SNP	5.85096
S3600-THY_vs_S3600-LIVER-resent	chr1	141185833	141185833	C	T	4930590L20Rik-Cdc73	n.141185833C>T	intergenic_region	MODIFIER	intergenic_region	36	0	0	82	45	0.549	SNP	6.03032
S3600-THY_vs_S3600-LIVER-resent	chr1	141620068	141620068	C	CTATCTATCTATATATATATATATATATA	4930590L20Rik-Cdc73	n.141620068_141620069insTATCTATCTATATATATATATATATATA	intergenic_region	MODIFIER	intergenic_region	46	0	0	24	24	1	INSERTION.NOVEL_10orMore	6.4243
S3600-THY_vs_S3600-LIVER-resent	chr1	141658516	141658516	T	A	4930590L20Rik-Cdc73	n.141658516T>A	intergenic_region	MODIFIER	intergenic_region	43	1	0.024	16	16	1	SNP	6.59444
S3600-THY_vs_S3600-LIVER-resent	chr1	142029942	142029942	C	T	4930590L20Rik-Cdc73	n.142029942C>T	intergenic_region	MODIFIER	intergenic_region	49	1	0.021	11	10	0.909	SNP	6.72053
S3600-THY_vs_S3600-LIVER-resent	chr1	142171592	142171592	C	G	4930590L20Rik-Cdc73	n.142171592C>G	intergenic_region	MODIFIER	intergenic_region	63	0	0	104	30	0.294	SNP	6.47441
S3600-THY_vs_S3600-LIVER-resent	chr1	142411281	142411281	T	A	4930590L20Rik-Cdc73	n.142411281T>A	intergenic_region	MODIFIER	intergenic_region	69	0	0	96	54	0.563	SNP	6.17867
S3600-THY_vs_S3600-LIVER-resent	chr1	142637028	142637028	T	G	4930590L20Rik-Cdc73	n.142637028T>G	intergenic_region	MODIFIER	intergenic_region	56	0	0	96	43	0.442	SNP	6.26382
S3600-THY_vs_S3600-LIVER-resent	chr1	142673381	142673382	GA	G	4930590L20Rik-Cdc73	n.142673382delA	intergenic_region	MODIFIER	intergenic_region	54	0	0	96	42	0.43	DELETION.NumRepetitions_10orMore.EventLength_1.RepeatExpansion_A	5.88391
S3600-THY_vs_S3600-LIVER-resent	chr1	142763198	142763198	C	G	4930590L20Rik-Cdc73	n.142763198C>G	intergenic_region	MODIFIER	intergenic_region	72	0	0	113	42	0.373	SNP	6.32154
S3600-THY_vs_S3600-LIVER-resent	chr1	142781401	142781401	G	C	4930590L20Rik-Cdc73	n.142781401G>C	intergenic_region	MODIFIER	intergenic_region	71	0	0	94	40	0.43	SNP	6.08955
S3600-THY_vs_S3600-LIVER-resent	chr1	142828053	142828053	C	A	4930590L20Rik-Cdc73	n.142828053C>A	intergenic_region	MODIFIER	intergenic_region	63	0	0	115	60	0.523	SNP	5.95278
S3600-THY_vs_S3600-LIVER-resent	chr1	142874691	142874691	G	GAA	4930590L20Rik-Cdc73	n.142874691_142874692insAA	intergenic_region	MODIFIER	intergenic_region	18	0	0	45	45	1	INSERTION.NumRepetitions_10orMore.EventLength_1.RepeatExpansion_A	6.74316
S3600-THY_vs_S3600-LIVER-resent	chr1	142967319	142967319	A	T	4930590L20Rik-Cdc73	n.142967319A>T	intergenic_region	MODIFIER	intergenic_region	68	0	0	98	21	0.216	SNP	5.1825
S3600-THY_vs_S3600-LIVER-resent	chr1	143030466	143030466	T	C	4930590L20Rik-Cdc73	n.143030466T>C	intergenic_region	MODIFIER	intergenic_region	68	0	0	85	41	0.488	SNP	6.0618
S3600-THY_vs_S3600-LIVER-resent	chr1	143241021	143241021	C	G	4930590L20Rik-Cdc73	n.143241021C>G	intergenic_region	MODIFIER	intergenic_region	67	0	0	114	55	0.478	SNP	6.14504
S3600-THY_vs_S3600-LIVER-resent	chr1	143324538	143324538	C	G	4930590L20Rik-Cdc73	n.143324538C>G	intergenic_region	MODIFIER	intergenic_region	68	0	0	95	52	0.547	SNP	5.84921
S3600-THY_vs_S3600-LIVER-resent	chr1	143498849	143498849	A	AATATATATATATATATAT	4930590L20Rik-Cdc73	n.143498849_143498850insATATATATATATATATAT	intergenic_region	MODIFIER	intergenic_region	44	0	0.023	15	13	0.9	INSERTION.NumRepetitions_10orMore.EventLength_2.RepeatExpansion_AT	6.48943
S3600-THY_vs_S3600-LIVER-resent	chr1	143505011	143505011	G	GAAA	4930590L20Rik-Cdc73	n.143505011_143505012insAAA	intergenic_region	MODIFIER	intergenic_region	53	9	0	85	84	0.5	INSERTION.NumRepetitions_10orMore.EventLength_1.RepeatExpansion_A	6.2172
S3600-THY_vs_S3600-LIVER-resent	chr1	143530719	143530719	C	G	4930590L20Rik-Cdc73	n.143530719C>G	intergenic_region	MODIFIER	intergenic_region	38	0	0	52	30	0.577	SNP	6.10784
S3600-THY_vs_S3600-LIVER-resent	chr1	143874151	143874151	G	C	Uchl5-Rgs2	n.143874151G>C	intergenic_region	MODIFIER	intergenic_region	83	0	0	109	49	0.45	SNP	5.78111
S3600-THY_vs_S3600-LIVER-resent	chr1	144041831	144041831	G	C	Rgs2-Rgs13	n.144041831G>C	intergenic_region	MODIFIER	intergenic_region	64	0	0	103	21	0.206	SNP	4.72094
S3600-THY_vs_S3600-LIVER-resent	chr1	144409094	144409094	C	G	Rgs1-Rgs21	n.144409094C>G	intergenic_region	MODIFIER	intergenic_region	73	0	0	74	35	0.466	SNP	5.82034
S3600-THY_vs_S3600-LIVER-resent	chr1	144484118	144484118	G	GTT	Rgs1-Rgs21	n.144484118_144484119insTT	intergenic_region	MODIFIER	intergenic_region	21	5	0	22	22	1	INSERTION.NumRepetitions_10orMore.EventLength_1.RepeatExpansion_T	6.44599
S3600-THY_vs_S3600-LIVER-resent	chr1	144569415	144569415	T	TAA	Rgs21	c.-24096_-24095insTT	upstream_gene_variant	MODIFIER	transcript	63	14	0	85	85	1	INSERTION.NumRepetitions_10orMore.EventLength_1.RepeatExpansion_A	5.96409
S3600-THY_vs_S3600-LIVER-resent	chr1	144575435	144575435	C	G	Rgs21-Rgs18	n.144575435C>G	intergenic_region	MODIFIER	intergenic_region	57	0	0	109	49	0.449	SNP	6.1197
S3600-THY_vs_S3600-LIVER-resent	chr1	144613660	144613660	C	CAGAGAGAGAGAG	Rgs21-Rgs18	n.144613660_144613661insAGAGAGAGAGAG	intergenic_region	MODIFIER	intergenic_region	24	0	0	12	11	0.929	INSERTION.NumRepetitions_10orMore.EventLength_2.RepeatExpansion_AG	7.69955
S3600-THY_vs_S3600-LIVER-resent	chr1	144764054	144764054	G	C	Rgs18	c.284-7965C>G	intron_variant	MODIFIER	transcript	61	0	0	113	55	0.486	SNP	5.99702
S3600-THY_vs_S3600-LIVER-resent	chr1	145086543	145086543	T	TTTTGAAAAAAATCCAA	Rgs18-Brinp3	n.145086543_145086544insTTTGAAAAAAATCCAA	intergenic_region	MODIFIER	intergenic_region	45	0	0	11	9	0.818	INSERTION.NOVEL_10orMore	6.00554
S3600-THY_vs_S3600-LIVER-resent	chr1	145313770	145313770	G	GTGTGTATATATATA	Rgs18-Brinp3	n.145313770_145313771insTGTGTATATATATA	intergenic_region	MODIFIER	intergenic_region	35	1	0	6	6	1	INSERTION.NOVEL_10orMore	5.80777
S3600-THY_vs_S3600-LIVER-resent	chr1	145466295	145466295	A	AATATATATATATATATATATATATATATATATATATATAT	Rgs18-Brinp3	n.145466295_145466296insATATATATATATATATATATATATATATATATATATATAT	intergenic_region	MODIFIER	intergenic_region	53	0	0	9	8	0.952	INSERTION.NumRepetitions_6.EventLength_2.RepeatExpansion_AT	6.24644
S3600-THY_vs_S3600-LIVER-resent	chr1	145574719	145574719	T	C	Rgs18-Brinp3	n.145574719T>C	intergenic_region	MODIFIER	intergenic_region	19	0	0	22	21	0.955	SNP	5.95685
S3600-THY_vs_S3600-LIVER-resent	chr1	145582602	145582602	A	G	Rgs18-Brinp3	n.145582602A>G	intergenic_region	MODIFIER	intergenic_region	41	0	0	8	6	0.75	SNP	5.69847
S3600-THY_vs_S3600-LIVER-resent	chr1	145608431	145608433	TAC	T	Rgs18-Brinp3	n.145608432_145608433delAC	intergenic_region	MODIFIER	intergenic_region	8	0	0	13	13	1	DELETION.NumRepetitions_1.EventLength_2.RepeatExpansion_AC	5.30854
S3600-THY_vs_S3600-LIVER-resent	chr1	145935836	145935836	C	CCTTCCTTCCTTCCTTTCTTT	Rgs18-Brinp3	n.145935836_145935837insCTTCCTTCCTTCCTTTCTTT	intergenic_region	MODIFIER	intergenic_region	45	0	0	13	12	1	INSERTION.NOVEL_10orMore	6.49289
S3600-THY_vs_S3600-LIVER-resent	chr1	145966370	145966370	G	GGGGGAGTGGGTGGGCA	Rgs18-Brinp3	n.145966370_145966371insGGGGAGTGGGTGGGCA	intergenic_region	MODIFIER	intergenic_region	19	0	0	8	8	1	INSERTION.NOVEL_10orMore	6.34637
S3600-THY_vs_S3600-LIVER-resent	chr1	146178629	146178633	GTTTT	G	Rgs18-Brinp3	n.146178630_146178633delTTTT	intergenic_region	MODIFIER	intergenic_region	14	0	0	30	30	1	DELETION.NumRepetitions_10orMore.EventLength_1.RepeatExpansion_T	6.45841
S3600-THY_vs_S3600-LIVER-resent	chr1	146221678	146221678	T	TAAAAA	Rgs18-Brinp3	n.146221678_146221679insAAAAA	intergenic_region	MODIFIER	intergenic_region	14	0	0	32	30	0.941	INSERTION.NumRepetitions_10orMore.EventLength_1.RepeatExpansion_A	7.15159
S3600-THY_vs_S3600-LIVER-resent	chr1	146343836	146343836	C	CTTT	Rgs18-Brinp3	n.146343836_146343837insTTT	intergenic_region	MODIFIER	intergenic_region	61	15	0	114	113	0.667	INSERTION.NumRepetitions_9.EventLength_1.RepeatExpansion_T	6.23013
S3600-THY_vs_S3600-LIVER-resent	chr1	146656428	146656428	A	ATT	Brinp3	c.237-26148_237-26147insTT	intron_variant	MODIFIER	transcript	59	17	0	93	92	0.5	INSERTION.NumRepetitions_10orMore.EventLength_1.RepeatExpansion_T	6.00181
S3600-THY_vs_S3600-LIVER-resent	chr1	147122993	147122993	C	CGTGT	Brinp3-Pla2g4a	n.147122993_147122994insGTGT	intergenic_region	MODIFIER	intergenic_region	13	0	0.071	9	9	1	INSERTION.NumRepetitions_10orMore.EventLength_2.RepeatExpansion_GT	5.69672
S3600-THY_vs_S3600-LIVER-resent	chr1	147171203	147171203	C	G	Brinp3-Pla2g4a	n.147171203C>G	intergenic_region	MODIFIER	intergenic_region	68	0	0	102	47	0.455	SNP	5.89966
S3600-THY_vs_S3600-LIVER-resent	chr1	147226411	147226411	C	CTATATATATATA	Brinp3-Pla2g4a	n.147226411_147226412insTATATATATATA	intergenic_region	MODIFIER	intergenic_region	19	0	0	6	6	1	INSERTION.NumRepetitions_10orMore.EventLength_2.RepeatExpansion_TA	5.24822
S3600-THY_vs_S3600-LIVER-resent	chr1	147250469	147250469	A	G	Brinp3-Pla2g4a	n.147250469A>G	intergenic_region	MODIFIER	intergenic_region	31	1	0.032	14	14	1	SNP	7.72201
S3600-THY_vs_S3600-LIVER-resent	chr1	147272585	147272585	A	AATATATATATATATATATATATATATATATATATATAT	Brinp3-Pla2g4a	n.147272585_147272586insATATATATATATATATATATATATATATATATATATAT	intergenic_region	MODIFIER	intergenic_region	37	1	0.027	9	9	1	INSERTION.NumRepetitions_7.EventLength_2.RepeatExpansion_AT	8.04207
S3600-THY_vs_S3600-LIVER-resent	chr1	147309099	147309099	C	CGTGTGTGT	Brinp3-Pla2g4a	n.147309099_147309100insGTGTGTGT	intergenic_region	MODIFIER	intergenic_region	8	0	0	14	14	1	INSERTION.NOVEL_2	5.50484
S3600-THY_vs_S3600-LIVER-resent	chr1	147565266	147565266	C	T	Brinp3-Pla2g4a	n.147565266C>T	intergenic_region	MODIFIER	intergenic_region	48	0	0	101	62	0.61	SNP	6.02365
S3600-THY_vs_S3600-LIVER-resent	chr1	147700460	147700460	T	TGATA	Brinp3-Pla2g4a	n.147700460_147700461insGATA	intergenic_region	MODIFIER	intergenic_region	24	0	0	18	16	0.889	INSERTION.NumRepetitions_10orMore.EventLength_4	6.92616
S3600-THY_vs_S3600-LIVER-resent	chr1	147764504	147764504	G	GCTCTCT	Brinp3-Pla2g4a	n.147764504_147764505insCTCTCT	intergenic_region	MODIFIER	intergenic_region	15	1	0.071	23	23	1	INSERTION.NumRepetitions_10orMore.EventLength_2.RepeatExpansion_CT	6.5998
S3600-THY_vs_S3600-LIVER-resent	chr1	148087210	148087210	C	G	Brinp3-Pla2g4a	n.148087210C>G	intergenic_region	MODIFIER	intergenic_region	60	0	0	108	63	0.581	SNP	6.03306
S3600-THY_vs_S3600-LIVER-resent	chr1	148190076	148190077	GT	G	Brinp3-Pla2g4a	n.148190077delT	intergenic_region	MODIFIER	intergenic_region	32	0	0	50	15	0.306	DELETION.NumRepetitions_7.EventLength_1.RepeatExpansion_T	3.56713
S3600-THY_vs_S3600-LIVER-resent	chr1	148936691	148936691	T	TTTTTTTTTTTTTTTTTA	Brinp3-Pla2g4a	n.148936691_148936692insTTTTTTTTTTTTTTTTA	intergenic_region	MODIFIER	intergenic_region	39	0	0	56	15	0.268	INSERTION.NOVEL_10orMore	3.57112
S3600-THY_vs_S3600-LIVER-resent	chr1	149248865	149248865	T	TAA	Brinp3-Pla2g4a	n.149248865_149248866insAA	intergenic_region	MODIFIER	intergenic_region	45	0	0	37	35	1	INSERTION.NumRepetitions_10orMore.EventLength_1.RepeatExpansion_A	5.86454
S3600-THY_vs_S3600-LIVER-resent	chr1	149427862	149427862	C	T	Brinp3-Pla2g4a	n.149427862C>T	intergenic_region	MODIFIER	intergenic_region	79	0	0	110	53	0.482	SNP	5.84063
S3600-THY_vs_S3600-LIVER-resent	chr1	149662432	149662432	C	G	Brinp3-Pla2g4a	n.149662432C>G	intergenic_region	MODIFIER	intergenic_region	62	0	0	107	53	0.491	SNP	6.02261
S3600-THY_vs_S3600-LIVER-resent	chr1	149697609	149697609	C	G	Brinp3-Pla2g4a	n.149697609C>G	intergenic_region	MODIFIER	intergenic_region	76	1	0.014	95	50	0.532	SNP	6.20616
S3600-THY_vs_S3600-LIVER-resent	chr1	149702533	149702533	C	T	Brinp3-Pla2g4a	n.149702533C>T	intergenic_region	MODIFIER	intergenic_region	21	0	0	20	6	0.3	SNP	2.06448
S3600-THY_vs_S3600-LIVER-resent	chr1	149753423	149753423	C	G	Brinp3-Pla2g4a	n.149753423C>G	intergenic_region	MODIFIER	intergenic_region	74	0	0	84	38	0.452	SNP	5.82958
S3600-THY_vs_S3600-LIVER-resent	chr1	149969853	149969853	C	A	Pla2g4a-Mir7652	n.149969853C>A	intergenic_region	MODIFIER	intergenic_region	41	0	0	27	25	0.926	SNP	6.51989
S3600-THY_vs_S3600-LIVER-resent	chr1	150074505	150074506	CA	C	Ptgs2os	n.*367delT	downstream_gene_variant	MODIFIER	transcript	43	0	0	87	45	0.524	DELETION.NumRepetitions_10orMore.EventLength_1.RepeatExpansion_A	5.88082
S3600-THY_vs_S3600-LIVER-resent	chr1	150154554	150154554	C	G	Ptgs2os2	n.*4489G>C	downstream_gene_variant	MODIFIER	transcript	65	1	0.016	104	54	0.519	SNP	5.85574
S3600-THY_vs_S3600-LIVER-resent	chr1	150193090	150193090	C	G	Ptgs2os2-Pdc	n.150193090C>G	intergenic_region	MODIFIER	intergenic_region	62	0	0	103	52	0.5	SNP	5.74584
S3600-THY_vs_S3600-LIVER-resent	chr1	150230024	150230024	C	G	Ptgs2os2-Pdc	n.150230024C>G	intergenic_region	MODIFIER	intergenic_region	43	0	0	80	39	0.488	SNP	5.88816
S3600-THY_vs_S3600-LIVER-resent	chr1	150231259	150231259	C	G	Ptgs2os2-Pdc	n.150231259C>G	intergenic_region	MODIFIER	intergenic_region	84	0	0	122	61	0.504	SNP	6.02207
S3600-THY_vs_S3600-LIVER-resent	chr1	150281630	150281630	C	G	Ptgs2os2-Pdc	n.150281630C>G	intergenic_region	MODIFIER	intergenic_region	64	0	0	83	47	0.566	SNP	5.99618
S3600-THY_vs_S3600-LIVER-resent	chr1	150283190	150283190	G	C	Ptgs2os2-Pdc	n.150283190G>C	intergenic_region	MODIFIER	intergenic_region	63	0	0	95	19	0.2	SNP	4.50252
S3600-THY_vs_S3600-LIVER-resent	chr1	150286344	150286344	C	G	Ptgs2os2-Pdc	n.150286344C>G	intergenic_region	MODIFIER	intergenic_region	46	0	0	81	41	0.513	SNP	5.94705
S3600-THY_vs_S3600-LIVER-resent	chr1	150372122	150372122	C	G	BC003331	c.1075G>C	missense_variant	MODERATE	transcript	77	0	0	108	53	0.495	SNP	5.93143
S3600-THY_vs_S3600-LIVER-resent	chr1	150602256	150602256	C	G	Hmcn1	c.13921+1535G>C	intron_variant	MODIFIER	transcript	82	0	0	118	58	0.487	SNP	6.2804
S3600-THY_vs_S3600-LIVER-resent	chr1	150844152	150844152	C	T	Hmcn1	c.621+14987G>A	intron_variant	MODIFIER	transcript	26	0	0	37	37	1	SNP	6.6569
S3600-THY_vs_S3600-LIVER-resent	chr1	150904223	150904223	C	G	Hmcn1	c.269-27728G>C	intron_variant	MODIFIER	transcript	82	1	0.012	109	53	0.486	SNP	6.19594
S3600-THY_vs_S3600-LIVER-resent	chr1	150933738	150933738	C	G	Hmcn1	c.269-57243G>C	intron_variant	MODIFIER	transcript	65	0	0	113	59	0.522	SNP	6.01111
S3600-THY_vs_S3600-LIVER-resent	chr1	150994293	150994293	C	G	Hmcn1	c.-1242G>C	upstream_gene_variant	MODIFIER	transcript	73	0	0	99	44	0.449	SNP	6.05128
S3600-THY_vs_S3600-LIVER-resent	chr1	151002439	151002439	C	G	Hmcn1-C730036E19Rik	n.151002439C>G	intergenic_region	MODIFIER	intergenic_region	85	0	0	119	53	0.449	SNP	6.18879
S3600-THY_vs_S3600-LIVER-resent	chr1	151020470	151020470	C	G	Hmcn1-C730036E19Rik	n.151020470C>G	intergenic_region	MODIFIER	intergenic_region	111	0	0	125	59	0.472	SNP	5.69874
S3600-THY_vs_S3600-LIVER-resent	chr1	151032351	151032351	C	G	Hmcn1-C730036E19Rik	n.151032351C>G	intergenic_region	MODIFIER	intergenic_region	92	0	0	124	58	0.463	SNP	6.05101
S3600-THY_vs_S3600-LIVER-resent	chr1	151049618	151049618	C	G	Hmcn1-C730036E19Rik	n.151049618C>G	intergenic_region	MODIFIER	intergenic_region	71	0	0	109	54	0.495	SNP	6.01535
S3600-THY_vs_S3600-LIVER-resent	chr1	151064471	151064471	G	A	Hmcn1-C730036E19Rik	n.151064471G>A	intergenic_region	MODIFIER	intergenic_region	52	0	0	11	7	0.636	SNP	6.22442
S3600-THY_vs_S3600-LIVER-resent	chr1	151081329	151081341	GCTGGTCTTGAAC	G	Hmcn1-C730036E19Rik	n.151081330_151081341delCTGGTCTTGAAC	intergenic_region	MODIFIER	intergenic_region	115	1	0.00885	129	62	0.484	DELETION.NumRepetitions_1.EventLength_10orMore	6.05823
S3600-THY_vs_S3600-LIVER-resent	chr1	151082869	151082869	C	G	Hmcn1-C730036E19Rik	n.151082869C>G	intergenic_region	MODIFIER	intergenic_region	107	0	0	114	53	0.469	SNP	5.85023
S3600-THY_vs_S3600-LIVER-resent	chr1	151086788	151086788	C	G	Hmcn1-C730036E19Rik	n.151086788C>G	intergenic_region	MODIFIER	intergenic_region	64	0	0	60	20	0.333	SNP	6.40216
S3600-THY_vs_S3600-LIVER-resent	chr1	151098672	151098672	C	G	Hmcn1-C730036E19Rik	n.151098672C>G	intergenic_region	MODIFIER	intergenic_region	88	0	0	113	51	0.446	SNP	6.30288
S3600-THY_vs_S3600-LIVER-resent	chr1	151212794	151212794	C	G	C730036E19Rik-Ivns1abp	n.151212794C>G	intergenic_region	MODIFIER	intergenic_region	39	1	0.026	62	25	0.41	SNP	4.9476
S3600-THY_vs_S3600-LIVER-resent	chr1	151324501	151324501	C	CGAAAAA	C730036E19Rik-Ivns1abp	n.151324501_151324502insGAAAAA	intergenic_region	MODIFIER	intergenic_region	66	14	0	88	80	0.333	INSERTION.NOVEL_6	6.05657
S3600-THY_vs_S3600-LIVER-resent	chr1	151567301	151567301	T	TGAGAGAGAGAGA	Fam129a	c.-4229_-4228insGAGAGAGAGAGA	upstream_gene_variant	MODIFIER	transcript	23	0	0	12	12	1	INSERTION.NumRepetitions_10orMore.EventLength_2.RepeatExpansion_GA	6.47892
S3600-THY_vs_S3600-LIVER-resent	chr1	151629192	151629192	G	GGTGTGTGTGTGTGT	Fam129a	c.56-7212_56-7211insGTGTGTGTGTGTGT	intron_variant	MODIFIER	transcript	40	1	0.025	26	24	0.935	INSERTION.NumRepetitions_10orMore.EventLength_2.RepeatExpansion_GT	6.7244
S3600-THY_vs_S3600-LIVER-resent	chr1	151671808	151671808	C	T	Fam129a	c.599-17711C>T	intron_variant	MODIFIER	transcript	70	1	0.014	17	17	1	SNP	6.35949
S3600-THY_vs_S3600-LIVER-resent	chr1	152323247	152323247	C	G	1700025G04Rik-Tsen15	n.152323247C>G	intergenic_region	MODIFIER	intergenic_region	86	1	0.012	126	69	0.556	SNP	5.86364
S3600-THY_vs_S3600-LIVER-resent	chr1	152330484	152330484	C	G	1700025G04Rik-Tsen15	n.152330484C>G	intergenic_region	MODIFIER	intergenic_region	61	0	0	101	39	0.398	SNP	6.03635
S3600-THY_vs_S3600-LIVER-resent	chr1	152759715	152759716	TC	T	Apobec4	c.*2369delC	downstream_gene_variant	MODIFIER	transcript	4	0	0	21	19	0.905	DELETION.NumRepetitions_10orMore.EventLength_1.RepeatExpansion_C	2.926
S3600-THY_vs_S3600-LIVER-resent	chr1	152805757	152805764	TATGACCC	T	Ncf2	c.-775-1499_-775-1493delATGACCC	intron_variant	MODIFIER	transcript	68	1	0.015	12	12	1	DELETION.NumRepetitions_1.EventLength_7	6.23724
S3600-THY_vs_S3600-LIVER-resent	chr1	152829037	152829037	A	G	Ncf2	c.714-1315A>G	intron_variant	MODIFIER	transcript	49	1	0.02	10	6	0.6	SNP	4.51549
S3600-THY_vs_S3600-LIVER-resent	chr1	152975017	152975017	C	G	Nmnat2	c.85+19824C>G	intron_variant	MODIFIER	transcript	92	0	0	130	60	0.449	SNP	5.89776
S3600-THY_vs_S3600-LIVER-resent	chr1	152977786	152977786	C	G	Nmnat2	c.85+22593C>G	intron_variant	MODIFIER	transcript	37	0	0	42	15	0.357	SNP	4.69815
S3600-THY_vs_S3600-LIVER-resent	chr1	153004636	153004636	C	G	Nmnat2	c.85+49443C>G	intron_variant	MODIFIER	transcript	63	0	0	109	49	0.454	SNP	6.3727
S3600-THY_vs_S3600-LIVER-resent	chr1	153146340	153146340	G	C	Lamc2	c.954-589C>G	intron_variant	MODIFIER	transcript	71	1	0.014	111	39	0.345	SNP	6.00475
S3600-THY_vs_S3600-LIVER-resent	chr1	153300042	153300042	C	CAAAA	Lamc1	c.412+32085_412+32086insTTTT	intron_variant	MODIFIER	transcript	21	0	0.125	13	13	1	INSERTION.NumRepetitions_10orMore.EventLength_1.RepeatExpansion_A	6.52979
S3600-THY_vs_S3600-LIVER-resent	chr1	153445724	153445724	G	C	Shcbp1l	c.1141-74G>C	intron_variant	MODIFIER	transcript	82	0	0	111	23	0.211	SNP	5.87646
S3600-THY_vs_S3600-LIVER-resent	chr1	153533231	153533231	C	CAAAAAA	Npl	c.230+2640_230+2641insTTTTTT	intron_variant	MODIFIER	transcript	25	1	0.04	12	11	0.938	INSERTION.NumRepetitions_10orMore.EventLength_1.RepeatExpansion_A	6.78919
S3600-THY_vs_S3600-LIVER-resent	chr1	153592934	153592934	A	C	Npl-Rgs8	n.153592934A>C	intergenic_region	MODIFIER	intergenic_region	43	1	0.023	14	13	0.929	SNP	6.22581
S3600-THY_vs_S3600-LIVER-resent	chr1	153611696	153611696	A	G	Npl-Rgs8	n.153611696A>G	intergenic_region	MODIFIER	intergenic_region	86	0	0	123	63	0.512	SNP	5.85529
S3600-THY_vs_S3600-LIVER-resent	chr1	153722276	153722276	A	ATT	C230024C17Rik	n.2299_2300dupAA	non_coding_transcript_exon_variant	MODIFIER	transcript	76	15	NA	90	86	1	INSERTION.NumRepetitions_10orMore.EventLength_1.RepeatExpansion_T	5.86379
S3600-THY_vs_S3600-LIVER-resent	chr1	153757347	153757347	A	T	Rnasel	c.1561-1036A>T	intron_variant	MODIFIER	transcript	52	1	0.019	21	21	1	SNP	6.77524
S3600-THY_vs_S3600-LIVER-resent	chr1	153895706	153895706	G	C	Mir8114	n.-4220G>C	upstream_gene_variant	MODIFIER	transcript	84	0	0	90	36	0.419	SNP	6.41351
S3600-THY_vs_S3600-LIVER-resent	chr1	153922120	153922134	ATATATATATATATG	A	Glul-Zfp648	n.153922121_153922134delTATATATATATATG	intergenic_region	MODIFIER	intergenic_region	11	0	0	13	13	1	DELETION.NumRepetitions_1.EventLength_10orMore	6.39727
S3600-THY_vs_S3600-LIVER-resent	chr1	153963009	153963009	A	G	Glul-Zfp648	n.153963009A>G	intergenic_region	MODIFIER	intergenic_region	36	1	0.029	21	20	0.952	SNP	6.76995
S3600-THY_vs_S3600-LIVER-resent	chr1	153985956	153985956	C	G	Glul-Zfp648	n.153985956C>G	intergenic_region	MODIFIER	intergenic_region	63	1	0.016	103	47	0.456	SNP	5.89521
S3600-THY_vs_S3600-LIVER-resent	chr1	154053918	154053918	G	C	Glul-Zfp648	n.154053918G>C	intergenic_region	MODIFIER	intergenic_region	69	1	0.015	98	50	0.51	SNP	5.97148
S3600-THY_vs_S3600-LIVER-resent	chr1	154056338	154056338	C	T	Glul-Zfp648	n.154056338C>T	intergenic_region	MODIFIER	intergenic_region	87	14	0	90	88	0.333	SNP	5.72816
S3600-THY_vs_S3600-LIVER-resent	chr1	154059104	154059104	G	GAA	Glul-Zfp648	n.154059104_154059105insAA	intergenic_region	MODIFIER	intergenic_region	59	11	0	86	86	1	INSERTION.NumRepetitions_8.EventLength_1.RepeatExpansion_A	6.14077
S3600-THY_vs_S3600-LIVER-resent	chr1	154129292	154129292	A	ATT	Glul-Zfp648	n.154129292_154129293insTT	intergenic_region	MODIFIER	intergenic_region	58	15	0	93	92	0.667	INSERTION.NumRepetitions_9.EventLength_1.RepeatExpansion_T	6.0545
S3600-THY_vs_S3600-LIVER-resent	chr1	154190753	154190753	C	G	Glul-Zfp648	n.154190753C>G	intergenic_region	MODIFIER	intergenic_region	80	0	0	88	46	0.517	SNP	5.77838
S3600-THY_vs_S3600-LIVER-resent	chr1	154489712	154489712	A	AGTGTGTGT	Cacna1e	c.1175-875_1175-874insACACACAC	intron_variant	MODIFIER	transcript	24	0	0.077	7	6	0.917	INSERTION.NumRepetitions_10orMore.EventLength_2.RepeatExpansion_GT	5.02195
S3600-THY_vs_S3600-LIVER-resent	chr1	154635908	154635908	C	G	Cacna1e	c.516-48G>C	intron_variant	MODIFIER	transcript	98	0	0	131	59	0.461	SNP	6.22798
S3600-THY_vs_S3600-LIVER-resent	chr1	154647982	154647982	C	G	Cacna1e	c.516-12122G>C	intron_variant	MODIFIER	transcript	86	0	0	119	63	0.521	SNP	5.82258
S3600-THY_vs_S3600-LIVER-resent	chr1	154795248	154795248	G	GAAAAAGAAAAAAAAAA	Cacna1e-Ier5	n.154795248_154795249insAAAAAGAAAAAAAAAA	intergenic_region	MODIFIER	intergenic_region	61	4	0.019	32	31	0.923	INSERTION.NOVEL_10orMore	6.68257
S3600-THY_vs_S3600-LIVER-resent	chr1	154817160	154817160	C	G	Cacna1e-Ier5	n.154817160C>G	intergenic_region	MODIFIER	intergenic_region	88	0	0	103	48	0.471	SNP	6.15073
S3600-THY_vs_S3600-LIVER-resent	chr1	154820530	154820530	C	T	Cacna1e-Ier5	n.154820530C>T	intergenic_region	MODIFIER	intergenic_region	70	0	0	126	57	0.452	SNP	5.93967
S3600-THY_vs_S3600-LIVER-resent	chr1	154855129	154855129	C	G	Cacna1e-Ier5	n.154855129C>G	intergenic_region	MODIFIER	intergenic_region	84	0	0	124	64	0.512	SNP	5.85874
S3600-THY_vs_S3600-LIVER-resent	chr1	154885911	154885911	C	T	Cacna1e-Ier5	n.154885911C>T	intergenic_region	MODIFIER	intergenic_region	28	0	0	32	31	0.969	SNP	5.84043
S3600-THY_vs_S3600-LIVER-resent	chr1	154907673	154907673	C	T	Cacna1e-Ier5	n.154907673C>T	intergenic_region	MODIFIER	intergenic_region	36	1	0.028	18	17	0.944	SNP	7.21388
S3600-THY_vs_S3600-LIVER-resent	chr1	154993837	154993837	G	GTTTTTTTT	Cacna1e-Ier5	n.154993837_154993838insTTTTTTTT	intergenic_region	MODIFIER	intergenic_region	8	0	0	12	11	0.5	INSERTION.NumRepetitions_10orMore.EventLength_1.RepeatExpansion_T	4.14602
S3600-THY_vs_S3600-LIVER-resent	chr1	155226303	155226303	G	C	Stx6-Xpr1	n.155226303G>C	intergenic_region	MODIFIER	intergenic_region	81	0	0	124	28	0.228	SNP	5.94643
S3600-THY_vs_S3600-LIVER-resent	chr1	155378000	155378000	T	TAAAAAAA	Xpr1	c.121+6610_121+6611insTTTTTTT	intron_variant	MODIFIER	transcript	32	0	0.03	7	7	1	INSERTION.NumRepetitions_10orMore.EventLength_1.RepeatExpansion_A	7.18698
S3600-THY_vs_S3600-LIVER-resent	chr1	155435973	155435973	C	G	Xpr1-Gm5532	n.155435973C>G	intergenic_region	MODIFIER	intergenic_region	75	0	0	44	20	0.455	SNP	6.91815
S3600-THY_vs_S3600-LIVER-resent	chr1	155442414	155442414	G	GGGGGC	Xpr1-Gm5532	n.155442414_155442415insGGGGC	intergenic_region	MODIFIER	intergenic_region	24	0	0	24	24	1	INSERTION.NOVEL_5	6.58698
S3600-THY_vs_S3600-LIVER-resent	chr1	155460705	155460705	C	CAAA	Xpr1-Gm5532	n.155460705_155460706insAAA	intergenic_region	MODIFIER	intergenic_region	52	13	0	107	104	0.25	INSERTION.NumRepetitions_10orMore.EventLength_1.RepeatExpansion_A	6.0647
S3600-THY_vs_S3600-LIVER-resent	chr1	155462173	155462173	C	G	Xpr1-Gm5532	n.155462173C>G	intergenic_region	MODIFIER	intergenic_region	77	0	0	104	54	0.515	SNP	5.91753
S3600-THY_vs_S3600-LIVER-resent	chr1	155473762	155473762	T	TGTGTGTGTGAGAGA	Xpr1-Gm5532	n.155473762_155473763insGTGTGTGTGAGAGA	intergenic_region	MODIFIER	intergenic_region	32	1	0	12	12	1	INSERTION.NOVEL_10orMore	6.93831
S3600-THY_vs_S3600-LIVER-resent	chr1	155476048	155476048	A	ATTTTTTTT	Xpr1-Gm5532	n.155476048_155476049insTTTTTTTT	intergenic_region	MODIFIER	intergenic_region	52	0	0	13	8	0.615	INSERTION.NumRepetitions_10orMore.EventLength_1.RepeatExpansion_T	6.59349
S3600-THY_vs_S3600-LIVER-resent	chr1	155489583	155489583	C	G	Xpr1-Gm5532	n.155489583C>G	intergenic_region	MODIFIER	intergenic_region	67	0	0	103	41	0.406	SNP	6.09558
S3600-THY_vs_S3600-LIVER-resent	chr1	156243554	156243554	G	C	Fam163a-Tdrd5	n.156243554G>C	intergenic_region	MODIFIER	intergenic_region	74	0	0	138	38	0.274	SNP	6.07131
S3600-THY_vs_S3600-LIVER-resent	chr1	156288297	156288297	G	C	Tdrd5	c.1045C>G	missense_variant	MODERATE	transcript	72	0	0	119	57	0.483	SNP	5.86518
S3600-THY_vs_S3600-LIVER-resent	chr1	156290744	156290744	G	C	Tdrd5	c.961-2363C>G	intron_variant	MODIFIER	transcript	74	0	0	90	35	0.393	SNP	6.2206
S3600-THY_vs_S3600-LIVER-resent	chr1	156383876	156383876	G	C	Nphs2-Soat1	n.156383876G>C	intergenic_region	MODIFIER	intergenic_region	53	0	0	111	59	0.523	SNP	6.23984
S3600-THY_vs_S3600-LIVER-resent	chr1	156461170	156461170	G	C	Soat1	c.89-3166C>G	intron_variant	MODIFIER	transcript	24	0	0	55	26	0.473	SNP	4.94174
S3600-THY_vs_S3600-LIVER-resent	chr1	156473051	156473051	G	C	Soat1	c.-31+1097C>G	intron_variant	MODIFIER	transcript	70	0	0	99	51	0.515	SNP	5.9494
S3600-THY_vs_S3600-LIVER-resent	chr1	156486070	156486070	G	C	Soat1-Abl2	n.156486070G>C	intergenic_region	MODIFIER	intergenic_region	76	0	0	130	69	0.531	SNP	5.82674
S3600-THY_vs_S3600-LIVER-resent	chr1	156523124	156523124	G	C	Soat1-Abl2	n.156523124G>C	intergenic_region	MODIFIER	intergenic_region	65	0	0	107	25	0.229	SNP	5.59979
S3600-THY_vs_S3600-LIVER-resent	chr1	156545295	156545295	G	C	Soat1-Abl2	n.156545295G>C	intergenic_region	MODIFIER	intergenic_region	77	0	0	99	29	0.293	SNP	6.23095
S3600-THY_vs_S3600-LIVER-resent	chr1	157051849	157051849	G	C	Ralgps2-Tex35	n.157051849G>C	intergenic_region	MODIFIER	intergenic_region	97	0	0	154	52	0.34	SNP	6.09601
S3600-THY_vs_S3600-LIVER-resent	chr1	157052355	157052355	G	C	Ralgps2-Tex35	n.157052355G>C	intergenic_region	MODIFIER	intergenic_region	84	0	0	135	36	0.263	SNP	6.56595
S3600-THY_vs_S3600-LIVER-resent	chr1	157157622	157157622	G	C	Rasal2	c.2554C>G	missense_variant	MODERATE	transcript	69	0	0	107	51	0.476	SNP	5.96477
S3600-THY_vs_S3600-LIVER-resent	chr1	157384396	157384396	C	CTTTCT	Rasal2	c.202+27340_202+27341insAGAAA	intron_variant	MODIFIER	transcript	33	0	0	60	30	0.516	INSERTION.NumRepetitions_8.EventLength_5	6.52863
S3600-THY_vs_S3600-LIVER-resent	chr1	157450465	157450465	C	G	2810025M15Rik-BC026585	n.157450465C>G	intergenic_region	MODIFIER	intergenic_region	57	0	0	87	45	0.517	SNP	5.93013
S3600-THY_vs_S3600-LIVER-resent	chr1	157532333	157532333	C	G	Sec16b	c.515+160C>G	intron_variant	MODIFIER	transcript	67	0	0	119	46	0.397	SNP	6.09095
S3600-THY_vs_S3600-LIVER-resent	chr1	157538288	157538288	C	G	Sec16b	c.1286C>G	missense_variant	MODERATE	transcript	75	0	0	118	61	0.521	SNP	6.30241
S3600-THY_vs_S3600-LIVER-resent	chr1	157637970	157637970	C	G	Sec16b-Brinp2	n.157637970C>G	intergenic_region	MODIFIER	intergenic_region	80	0	0	103	47	0.465	SNP	5.96973
S3600-THY_vs_S3600-LIVER-resent	chr1	157753956	157753956	C	G	Sec16b-Brinp2	n.157753956C>G	intergenic_region	MODIFIER	intergenic_region	78	1	0.013	99	44	0.444	SNP	5.84425
S3600-THY_vs_S3600-LIVER-resent	chr1	158392918	158392918	T	C	Astn1	c.283+30053T>C	intron_variant	MODIFIER	transcript	59	1	0.018	109	57	0.514	SNP	5.91256
S3600-THY_vs_S3600-LIVER-resent	chr1	158428873	158428873	G	C	Astn1	c.284-43502G>C	intron_variant	MODIFIER	transcript	84	0	0	111	40	0.364	SNP	5.83815
S3600-THY_vs_S3600-LIVER-resent	chr1	158918125	158918125	C	G	Pappa2	c.1994+17821G>C	intron_variant	MODIFIER	transcript	58	0	0	120	52	0.424	SNP	6.43349
S3600-THY_vs_S3600-LIVER-resent	chr1	159068060	159068060	C	G	Pappa2-Rfwd2	n.159068060C>G	intergenic_region	MODIFIER	intergenic_region	79	0	0	122	66	0.542	SNP	5.88242
S3600-THY_vs_S3600-LIVER-resent	chr1	159155055	159155055	C	G	Pappa2-Rfwd2	n.159155055C>G	intergenic_region	MODIFIER	intergenic_region	74	0	0	116	53	0.461	SNP	6.08525
S3600-THY_vs_S3600-LIVER-resent	chr1	159257672	159257672	C	G	Rfwd2	c.837+5056C>G	intron_variant	MODIFIER	transcript	93	1	0.011	128	62	0.488	SNP	6.02529
S3600-THY_vs_S3600-LIVER-resent	chr1	159289660	159289660	C	G	Rfwd2	c.1283+620C>G	intron_variant	MODIFIER	transcript	69	1	0.014	108	53	0.491	SNP	5.7636
S3600-THY_vs_S3600-LIVER-resent	chr1	159372254	159372254	C	G	Rfwd2-Tnr	n.159372254C>G	intergenic_region	MODIFIER	intergenic_region	64	0	0	107	52	0.481	SNP	6.00285
S3600-THY_vs_S3600-LIVER-resent	chr1	159380082	159380082	C	G	Rfwd2-Tnr	n.159380082C>G	intergenic_region	MODIFIER	intergenic_region	60	0	0	122	56	0.467	SNP	5.90072
S3600-THY_vs_S3600-LIVER-resent	chr1	159384051	159384051	C	G	Rfwd2-Tnr	n.159384051C>G	intergenic_region	MODIFIER	intergenic_region	64	1	0.016	128	59	0.465	SNP	5.64375
S3600-THY_vs_S3600-LIVER-resent	chr1	159395767	159395767	C	G	Rfwd2-Tnr	n.159395767C>G	intergenic_region	MODIFIER	intergenic_region	65	0	0	81	42	0.519	SNP	5.94178
S3600-THY_vs_S3600-LIVER-resent	chr1	159420493	159420493	C	G	Rfwd2-Tnr	n.159420493C>G	intergenic_region	MODIFIER	intergenic_region	80	1	0.013	96	44	0.463	SNP	6.22429
S3600-THY_vs_S3600-LIVER-resent	chr1	159455280	159455280	C	G	Rfwd2-Tnr	n.159455280C>G	intergenic_region	MODIFIER	intergenic_region	62	0	0	132	77	0.583	SNP	6.17804
S3600-THY_vs_S3600-LIVER-resent	chr1	159642082	159642082	C	G	Tnr	c.-162-95429C>G	intron_variant	MODIFIER	transcript	65	0	0	97	47	0.49	SNP	5.9836
S3600-THY_vs_S3600-LIVER-resent	chr1	159671247	159671247	C	G	Tnr	c.-162-66264C>G	intron_variant	MODIFIER	transcript	64	0	0	122	58	0.479	SNP	5.73002
S3600-THY_vs_S3600-LIVER-resent	chr1	159685397	159685397	C	G	Tnr	c.-162-52114C>G	intron_variant	MODIFIER	transcript	77	0	0	113	53	0.477	SNP	5.97191
S3600-THY_vs_S3600-LIVER-resent	chr1	159772536	159772536	C	G	Tnr	c.-62+34925C>G	intron_variant	MODIFIER	transcript	77	0	0	104	49	0.461	SNP	6.31601
S3600-THY_vs_S3600-LIVER-resent	chr1	159810152	159810152	C	G	Tnr	c.-61-39834C>G	intron_variant	MODIFIER	transcript	73	0	0	131	64	0.488	SNP	5.80987
S3600-THY_vs_S3600-LIVER-resent	chr1	159812791	159812791	C	G	Tnr	c.-61-37195C>G	intron_variant	MODIFIER	transcript	95	0	0	111	51	0.459	SNP	6.17687
S3600-THY_vs_S3600-LIVER-resent	chr1	159833706	159833706	C	G	Tnr	c.-61-16280C>G	intron_variant	MODIFIER	transcript	70	0	0	115	61	0.535	SNP	6.0938
S3600-THY_vs_S3600-LIVER-resent	chr1	159913435	159913435	C	G	Tnr	c.3534+644C>G	intron_variant	MODIFIER	transcript	95	0	0	116	51	0.443	SNP	5.7813
S3600-THY_vs_S3600-LIVER-resent	chr1	160077558	160077558	C	G	4930523C07Rik	c.*2097C>G	3_prime_UTR_variant	MODIFIER	transcript	99	0	0	122	57	0.471	SNP	5.96408
S3600-THY_vs_S3600-LIVER-resent	chr1	160084951	160084951	C	G	Tnn	c.*1080G>C	downstream_gene_variant	MODIFIER	transcript	101	0	0	109	58	0.537	SNP	5.97681
S3600-THY_vs_S3600-LIVER-resent	chr1	160575988	160575988	G	C	Gpr52	c.*680C>G	downstream_gene_variant	MODIFIER	transcript	98	0	0	130	67	0.523	SNP	6.08453
S3600-THY_vs_S3600-LIVER-resent	chr1	160671802	160671802	C	G	Rabgap1l	c.1465+10239G>C	intron_variant	MODIFIER	transcript	98	0	0	129	55	0.43	SNP	6.16181
S3600-THY_vs_S3600-LIVER-resent	chr1	160764099	160764099	C	G	Rabgap1l	c.-42-23168G>C	intron_variant	MODIFIER	transcript	91	1	0.011	116	59	0.513	SNP	5.86343
S3600-THY_vs_S3600-LIVER-resent	chr1	160956236	160956236	G	GAAGA	Rc3h1	c.2364+257_2364+258insAAGA	intron_variant	MODIFIER	transcript	34	0	0	43	16	0.386	INSERTION.NumRepetitions_10orMore.EventLength_4	4.59522
S3600-THY_vs_S3600-LIVER-resent	chr1	161491861	161491861	C	G	Tnfsf18	c.-2852C>G	upstream_gene_variant	MODIFIER	transcript	71	0	0	123	57	0.463	SNP	5.86995
S3600-THY_vs_S3600-LIVER-resent	chr1	161909290	161909290	G	C	Suco-4930558K02Rik	n.161909290G>C	intergenic_region	MODIFIER	intergenic_region	74	0	0	104	41	0.392	SNP	5.90486
S3600-THY_vs_S3600-LIVER-resent	chr1	162086863	162086863	C	G	Dnm3	c.1770-2719G>C	intron_variant	MODIFIER	transcript	66	1	0.015	109	54	0.5	SNP	6.20753
S3600-THY_vs_S3600-LIVER-resent	chr1	162293407	162293407	C	G	Dnm3	c.1422+2145G>C	intron_variant	MODIFIER	transcript	73	0	0	126	42	0.336	SNP	6.39352
S3600-THY_vs_S3600-LIVER-resent	chr1	162300222	162300222	G	C	Dnm3	c.1336-4584C>G	intron_variant	MODIFIER	transcript	77	0	0	112	23	0.205	SNP	5.42414
S3600-THY_vs_S3600-LIVER-resent	chr1	162457335	162457335	C	G	Dnm3	c.161+20328G>C	intron_variant	MODIFIER	transcript	69	0	0	96	31	0.323	SNP	6.53867
S3600-THY_vs_S3600-LIVER-resent	chr1	162535972	162535972	C	G	Mettl13	c.1692G>C	splice_region_variant&synonymous_variant	LOW	transcript	63	0	0	106	58	0.547	SNP	6.16247
S3600-THY_vs_S3600-LIVER-resent	chr1	162952270	162952270	C	G	Fmo3	c.*1908G>C	downstream_gene_variant	MODIFIER	transcript	59	0	0	136	68	0.492	SNP	5.91665
S3600-THY_vs_S3600-LIVER-resent	chr1	162964899	162964899	C	G	Fmo3	c.628-820G>C	intron_variant	MODIFIER	transcript	66	0	0	114	60	0.531	SNP	5.85435
S3600-THY_vs_S3600-LIVER-resent	chr1	163200908	163200908	C	G	Mroh9-Prrx1	n.163200908C>G	intergenic_region	MODIFIER	intergenic_region	85	0	0	115	56	0.482	SNP	5.85982
S3600-THY_vs_S3600-LIVER-resent	chr1	163361347	163361347	C	G	Prrx1-Gorab	n.163361347C>G	intergenic_region	MODIFIER	intergenic_region	55	0	0	103	50	0.48	SNP	6.20625
S3600-THY_vs_S3600-LIVER-resent	chr1	163367358	163367358	C	G	Prrx1-Gorab	n.163367358C>G	intergenic_region	MODIFIER	intergenic_region	55	0	0	132	72	0.542	SNP	5.87308
S3600-THY_vs_S3600-LIVER-resent	chr1	163370862	163370862	C	G	Prrx1-Gorab	n.163370862C>G	intergenic_region	MODIFIER	intergenic_region	64	0	0	100	46	0.46	SNP	6.04421
S3600-THY_vs_S3600-LIVER-resent	chr1	163371865	163371865	C	G	Prrx1-Gorab	n.163371865C>G	intergenic_region	MODIFIER	intergenic_region	76	0	0	106	49	0.462	SNP	5.89596
S3600-THY_vs_S3600-LIVER-resent	chr1	163440045	163440045	C	G	Gorab-Mettl11b	n.163440045C>G	intergenic_region	MODIFIER	intergenic_region	65	1	0.015	102	44	0.431	SNP	6.19368
S3600-THY_vs_S3600-LIVER-resent	chr1	163757527	163757527	C	G	Mettl11b-Kifap3	n.163757527C>G	intergenic_region	MODIFIER	intergenic_region	77	0	0	126	65	0.516	SNP	6.0118
S3600-THY_vs_S3600-LIVER-resent	chr1	163758090	163758090	C	G	Mettl11b-Kifap3	n.163758090C>G	intergenic_region	MODIFIER	intergenic_region	69	0	0	130	67	0.508	SNP	5.83629
S3600-THY_vs_S3600-LIVER-resent	chr1	164152237	164152240	GAGA	G	Gm16548	n.-23_-21delTCT	upstream_gene_variant	MODIFIER	transcript	21	0	0	22	21	0.955	DELETION.NumRepetitions_1.EventLength_3	6.44541
S3600-THY_vs_S3600-LIVER-resent	chr1	164169770	164169770	C	CTGTGTG	F5	c.371-4330_371-4329insTGTGTG	intron_variant	MODIFIER	transcript	8	0	0	12	12	1	INSERTION.NumRepetitions_10orMore.EventLength_2.RepeatExpansion_TG	5.10027
S3600-THY_vs_S3600-LIVER-resent	chr1	164409039	164409039	G	A	Nme7	c.1155+5962G>A	intron_variant	MODIFIER	transcript	79	0	0	120	28	0.237	SNP	5.93708
S3600-THY_vs_S3600-LIVER-resent	chr1	164452011	164452011	A	ACC	Atp1b1	c.226+1477_226+1478insGG	intron_variant	MODIFIER	transcript	29	3	0	20	20	1	INSERTION.NumRepetitions_10orMore.EventLength_1.RepeatExpansion_C	6.02774
S3600-THY_vs_S3600-LIVER-resent	chr1	164618208	164618208	A	C	Atp1b1-Dpt	n.164618208A>C	intergenic_region	MODIFIER	intergenic_region	29	0	0	7	5	0.833	SNP	4.25411
S3600-THY_vs_S3600-LIVER-resent	chr1	164705356	164705356	C	G	Atp1b1-Dpt	n.164705356C>G	intergenic_region	MODIFIER	intergenic_region	63	0	0	90	42	0.455	SNP	6.0824
S3600-THY_vs_S3600-LIVER-resent	chr1	164844570	164844570	A	ATGTGTGTGTGTGTGTGTGTGTG	Dpt-Gm20743	n.164844570_164844571insTGTGTGTGTGTGTGTGTGTGTG	intergenic_region	MODIFIER	intergenic_region	37	1	0.027	16	16	1	INSERTION.NumRepetitions_10orMore.EventLength_2.RepeatExpansion_TG	7.53477
S3600-THY_vs_S3600-LIVER-resent	chr1	164912936	164912936	C	CAGAGAGAG	Gm20743-Xcl1	n.164912936_164912937insAGAGAGAG	intergenic_region	MODIFIER	intergenic_region	16	0	0	21	21	1	INSERTION.NumRepetitions_10orMore.EventLength_2.RepeatExpansion_AG	7.58214
S3600-THY_vs_S3600-LIVER-resent	chr1	164969158	164969158	C	CATATAT	Xcl1-4930568G15Rik	n.164969158_164969159insATATAT	intergenic_region	MODIFIER	intergenic_region	10	0	0	9	9	1	INSERTION.NumRepetitions_10orMore.EventLength_2.RepeatExpansion_AT	4.96557
S3600-THY_vs_S3600-LIVER-resent	chr1	165281974	165281974	G	C	Tiprl-Gpr161	n.165281974G>C	intergenic_region	MODIFIER	intergenic_region	63	0	0	97	36	0.375	SNP	5.86768
S3600-THY_vs_S3600-LIVER-resent	chr1	165571455	165571455	T	TGTGAGAGAGAGAGA	Adcy10	c.4479+641_4479+642insGTGAGAGAGAGAGA	intron_variant	MODIFIER	transcript	26	2	0	13	12	0.5	INSERTION.NOVEL_10orMore	6.55004
S3600-THY_vs_S3600-LIVER-resent	chr1	165730292	165730292	C	G	Rcsd1-Creg1	n.165730292C>G	intergenic_region	MODIFIER	intergenic_region	64	0	0	116	60	0.513	SNP	5.95116
S3600-THY_vs_S3600-LIVER-resent	chr1	165915420	165915420	G	C	Pou2f1	c.229-257C>G	intron_variant	MODIFIER	transcript	104	0	0	109	59	0.541	SNP	5.86611
S3600-THY_vs_S3600-LIVER-resent	chr1	165932718	165932718	G	C	Pou2f1	c.62-991C>G	intron_variant	MODIFIER	transcript	86	0	0	115	57	0.504	SNP	5.87921
S3600-THY_vs_S3600-LIVER-resent	chr1	165937035	165937035	G	C	Pou2f1	c.62-5308C>G	intron_variant	MODIFIER	transcript	87	0	0	152	67	0.444	SNP	5.92765
S3600-THY_vs_S3600-LIVER-resent	chr1	166314085	166314085	C	G	Ildr2	c.*3290C>G	3_prime_UTR_variant	MODIFIER	transcript	88	1	0.011	122	56	0.462	SNP	6.18639
S3600-THY_vs_S3600-LIVER-resent	chr1	166321447	166321447	C	G	Ildr2	c.*10652C>G	downstream_gene_variant	MODIFIER	transcript	76	0	0	99	59	0.596	SNP	6.02937
S3600-THY_vs_S3600-LIVER-resent	chr1	166431579	166431579	C	G	Pogk-Gm4846	n.166431579C>G	intergenic_region	MODIFIER	intergenic_region	68	0	0	132	48	0.362	SNP	5.96535
S3600-THY_vs_S3600-LIVER-resent	chr1	166545270	166545270	G	C	Gm4846-Gm4847	n.166545270G>C	intergenic_region	MODIFIER	intergenic_region	52	0	0	105	59	0.553	SNP	5.86755
S3600-THY_vs_S3600-LIVER-resent	chr1	166732724	166732724	C	G	Fmo9-Gm16701	n.166732724C>G	intergenic_region	MODIFIER	intergenic_region	78	0	0	110	44	0.393	SNP	6.36073
S3600-THY_vs_S3600-LIVER-resent	chr1	166832516	166832516	T	A	Fmo9-Gm16701	n.166832516T>A	intergenic_region	MODIFIER	intergenic_region	56	0	0	72	21	0.3	SNP	5.50674
S3600-THY_vs_S3600-LIVER-resent	chr1	166902669	166902669	C	T	Fmo9-Gm16701	n.166902669C>T	intergenic_region	MODIFIER	intergenic_region	75	0	0	95	42	0.442	SNP	6.17832
S3600-THY_vs_S3600-LIVER-resent	chr1	166942658	166942658	C	G	Fmo9-Gm16701	n.166942658C>G	intergenic_region	MODIFIER	intergenic_region	60	0	0	122	53	0.438	SNP	5.83688
S3600-THY_vs_S3600-LIVER-resent	chr1	167023820	167023820	C	G	Fam78b	c.263+21992C>G	intron_variant	MODIFIER	transcript	81	0	0	116	59	0.509	SNP	5.87452
S3600-THY_vs_S3600-LIVER-resent	chr1	167035370	167035370	G	C	Fam78b	c.263+33542G>C	intron_variant	MODIFIER	transcript	48	1	0.021	77	46	0.597	SNP	5.87453
S3600-THY_vs_S3600-LIVER-resent	chr1	167080388	167080388	C	G	Fam78b	c.*406+923C>G	intron_variant	MODIFIER	transcript	88	0	0	113	50	0.446	SNP	5.98409
S3600-THY_vs_S3600-LIVER-resent	chr1	167192183	167192183	T	A	Fam78b-Uck2	n.167192183T>A	intergenic_region	MODIFIER	intergenic_region	85	0	0	92	37	0.409	SNP	5.76006
S3600-THY_vs_S3600-LIVER-resent	chr1	167192185	167192185	C	G	Fam78b-Uck2	n.167192185C>G	intergenic_region	MODIFIER	intergenic_region	86	0	0	92	38	0.409	SNP	6.08955
S3600-THY_vs_S3600-LIVER-resent	chr1	167197161	167197161	G	C	Fam78b-Uck2	n.167197161G>C	intergenic_region	MODIFIER	intergenic_region	43	0	0	76	15	0.2	SNP	3.01168
S3600-THY_vs_S3600-LIVER-resent	chr1	167222849	167222849	G	C	Uck2	c.*3533C>G	downstream_gene_variant	MODIFIER	transcript	85	0	0	102	53	0.52	SNP	5.81883
S3600-THY_vs_S3600-LIVER-resent	chr1	167223554	167223554	G	C	Uck2	c.*2828C>G	downstream_gene_variant	MODIFIER	transcript	83	0	0	93	48	0.516	SNP	5.89437
S3600-THY_vs_S3600-LIVER-resent	chr1	167223858	167223858	G	C	Uck2	c.*2524C>G	downstream_gene_variant	MODIFIER	transcript	68	0	0	77	36	0.474	SNP	6.23122
S3600-THY_vs_S3600-LIVER-resent	chr1	167227646	167227646	G	C	Uck2	c.646+86C>G	intron_variant	MODIFIER	transcript	82	0	0	122	50	0.417	SNP	5.72591
S3600-THY_vs_S3600-LIVER-resent	chr1	167252219	167252219	G	C	Uck2	c.100-14571C>G	intron_variant	MODIFIER	transcript	91	1	0.011	113	54	0.478	SNP	5.90728
S3600-THY_vs_S3600-LIVER-resent	chr1	167296378	167296378	G	C	Mir6347-Tmco1	n.167296378G>C	intergenic_region	MODIFIER	intergenic_region	67	0	0	110	24	0.218	SNP	5.29675
S3600-THY_vs_S3600-LIVER-resent	chr1	167298450	167298450	G	C	Mir6347-Tmco1	n.167298450G>C	intergenic_region	MODIFIER	intergenic_region	77	0	0	85	39	0.452	SNP	6.10172
S3600-THY_vs_S3600-LIVER-resent	chr1	167302007	167302007	G	C	Mir6347-Tmco1	n.167302007G>C	intergenic_region	MODIFIER	intergenic_region	84	0	0	127	30	0.238	SNP	6.62536
S3600-THY_vs_S3600-LIVER-resent	chr1	167303504	167303504	G	C	Mir6347-Tmco1	n.167303504G>C	intergenic_region	MODIFIER	intergenic_region	79	0	0	108	22	0.204	SNP	5.55994
S3600-THY_vs_S3600-LIVER-resent	chr1	167586873	167586873	C	G	Lrrc52-Rxrg	n.167586873C>G	intergenic_region	MODIFIER	intergenic_region	64	0	0	122	67	0.556	SNP	6.05633
S3600-THY_vs_S3600-LIVER-resent	chr1	167603926	167603926	C	G	Rxrg	c.49+5126C>G	intron_variant	MODIFIER	transcript	42	0	0	67	43	0.642	SNP	6.09701
S3600-THY_vs_S3600-LIVER-resent	chr1	167614884	167614884	C	G	Rxrg	c.297+933C>G	intron_variant	MODIFIER	transcript	75	0	0	119	47	0.393	SNP	6.15417
S3600-THY_vs_S3600-LIVER-resent	chr1	167628750	167628750	C	G	Rxrg	c.622+1279C>G	intron_variant	MODIFIER	transcript	86	0	0	91	41	0.456	SNP	6.17569
S3600-THY_vs_S3600-LIVER-resent	chr1	167972766	167972766	C	G	Lmx1a-Pbx1	n.167972766C>G	intergenic_region	MODIFIER	intergenic_region	62	0	0	122	63	0.521	SNP	5.86386
S3600-THY_vs_S3600-LIVER-resent	chr1	168006390	168006390	C	G	Lmx1a-Pbx1	n.168006390C>G	intergenic_region	MODIFIER	intergenic_region	83	0	0	111	66	0.591	SNP	6.20004
S3600-THY_vs_S3600-LIVER-resent	chr1	168006677	168006677	C	G	Lmx1a-Pbx1	n.168006677C>G	intergenic_region	MODIFIER	intergenic_region	61	0	0	112	46	0.414	SNP	5.81833
S3600-THY_vs_S3600-LIVER-resent	chr1	168017380	168017380	C	G	Lmx1a-Pbx1	n.168017380C>G	intergenic_region	MODIFIER	intergenic_region	62	0	0	121	58	0.475	SNP	6.21396
S3600-THY_vs_S3600-LIVER-resent	chr1	168088718	168088718	C	G	Lmx1a-Pbx1	n.168088718C>G	intergenic_region	MODIFIER	intergenic_region	60	1	0.017	98	50	0.51	SNP	5.83407
S3600-THY_vs_S3600-LIVER-resent	chr1	168138803	168138803	C	G	Pbx1	n.168138803G>C	intragenic_variant	MODIFIER	gene_variant	53	0	0	84	46	0.542	SNP	6.02313
S3600-THY_vs_S3600-LIVER-resent	chr1	168219815	168219815	C	G	Pbx1	c.266-10220G>C	intron_variant	MODIFIER	transcript	72	0	0	100	51	0.51	SNP	5.89239
S3600-THY_vs_S3600-LIVER-resent	chr1	168339917	168339917	C	G	Pbx1	c.265+87952G>C	intron_variant	MODIFIER	transcript	53	0	0	95	45	0.479	SNP	6.2447
S3600-THY_vs_S3600-LIVER-resent	chr1	168426156	168426156	C	G	Pbx1	c.265+1713G>C	intron_variant	MODIFIER	transcript	58	0	0	110	53	0.486	SNP	5.82646
S3600-THY_vs_S3600-LIVER-resent	chr1	168658793	168658793	C	G	Mir6348-Nuf2	n.168658793C>G	intergenic_region	MODIFIER	intergenic_region	91	0	0	106	61	0.575	SNP	5.91758
S3600-THY_vs_S3600-LIVER-resent	chr1	168676726	168676726	C	G	Mir6348-Nuf2	n.168676726C>G	intergenic_region	MODIFIER	intergenic_region	69	1	0.014	102	53	0.525	SNP	6.17642
S3600-THY_vs_S3600-LIVER-resent	chr1	168696444	168696444	C	G	Mir6348-Nuf2	n.168696444C>G	intergenic_region	MODIFIER	intergenic_region	50	0	0	83	35	0.427	SNP	6.43636
S3600-THY_vs_S3600-LIVER-resent	chr1	168708473	168708473	C	G	Mir6348-Nuf2	n.168708473C>G	intergenic_region	MODIFIER	intergenic_region	58	0	0	75	38	0.5	SNP	6.20692
S3600-THY_vs_S3600-LIVER-resent	chr1	169036643	169036643	C	G	Mir6348-Nuf2	n.169036643C>G	intergenic_region	MODIFIER	intergenic_region	76	0	0	93	47	0.5	SNP	6.11939
S3600-THY_vs_S3600-LIVER-resent	chr1	169076137	169076137	C	T	Mir6348-Nuf2	n.169076137C>T	intergenic_region	MODIFIER	intergenic_region	45	0	0	68	36	0.522	SNP	5.90425
S3600-THY_vs_S3600-LIVER-resent	chr1	169381181	169381181	G	GTAAA	Mir6348-Nuf2	n.169381181_169381182insTAAA	intergenic_region	MODIFIER	intergenic_region	43	0	0	62	31	0.508	INSERTION.NumRepetitions_10orMore.EventLength_4	5.68352
S3600-THY_vs_S3600-LIVER-resent	chr1	169446158	169446158	C	G	Mir6348-Nuf2	n.169446158C>G	intergenic_region	MODIFIER	intergenic_region	72	0	0	106	47	0.443	SNP	6.21207
S3600-THY_vs_S3600-LIVER-resent	chr1	169658943	169658943	C	T	Rgs5	c.44+3322C>T	intron_variant	MODIFIER	transcript	69	1	0.015	86	37	0.43	SNP	5.90355
S3600-THY_vs_S3600-LIVER-resent	chr1	169674820	169674820	C	G	Rgs5	c.45-2007C>G	intron_variant	MODIFIER	transcript	81	0	0	115	54	0.465	SNP	6.20092
S3600-THY_vs_S3600-LIVER-resent	chr1	169775955	169775955	C	G	Rgs4-Ccdc190	n.169775955C>G	intergenic_region	MODIFIER	intergenic_region	78	0	0	114	58	0.509	SNP	5.94609
S3600-THY_vs_S3600-LIVER-resent	chr1	169834392	169834392	C	G	Rgs4-Ccdc190	n.169834392C>G	intergenic_region	MODIFIER	intergenic_region	93	0	0	119	60	0.513	SNP	6.2788
S3600-THY_vs_S3600-LIVER-resent	chr1	169952550	169952550	C	G	Hsd17b7	c.*483G>C	3_prime_UTR_variant	MODIFIER	transcript	92	0	0	109	52	0.477	SNP	5.78044
S3600-THY_vs_S3600-LIVER-resent	chr1	169958575	169958575	C	G	Hsd17b7	c.804+848G>C	intron_variant	MODIFIER	transcript	88	1	0.011	120	57	0.475	SNP	6.11724
S3600-THY_vs_S3600-LIVER-resent	chr1	169965186	169965186	C	G	3110045C21Rik	n.-4223C>G	upstream_gene_variant	MODIFIER	transcript	80	0	0	122	57	0.463	SNP	5.91951
S3600-THY_vs_S3600-LIVER-resent	chr1	169965953	169965953	C	G	3110045C21Rik	n.-3456C>G	upstream_gene_variant	MODIFIER	transcript	79	0	0	107	62	0.579	SNP	5.79826
S3600-THY_vs_S3600-LIVER-resent	chr1	169997437	169997437	C	G	Ddr2	c.1099+494G>C	intron_variant	MODIFIER	transcript	86	1	0.012	121	52	0.43	SNP	6.15726
S3600-THY_vs_S3600-LIVER-resent	chr1	170189100	170189100	C	G	Uap1-Uhmk1	n.170189100C>G	intergenic_region	MODIFIER	intergenic_region	83	0	0	114	59	0.522	SNP	6.19574
S3600-THY_vs_S3600-LIVER-resent	chr1	170204256	170204256	C	G	Uhmk1	c.1113+859G>C	intron_variant	MODIFIER	transcript	96	0	0	108	49	0.449	SNP	5.95952
S3600-THY_vs_S3600-LIVER-resent	chr1	170386940	170386940	C	G	Nos1ap	c.270+3791G>C	intron_variant	MODIFIER	transcript	77	0	0	117	53	0.453	SNP	5.90252
S3600-THY_vs_S3600-LIVER-resent	chr1	170441218	170441218	C	G	Nos1ap	c.178-50395G>C	intron_variant	MODIFIER	transcript	69	0	0	123	59	0.48	SNP	6.24407
S3600-THY_vs_S3600-LIVER-resent	chr1	170452940	170452940	C	A	Nos1ap	c.177+61675G>T	intron_variant	MODIFIER	transcript	93	0	0	131	61	0.457	SNP	6.17707
S3600-THY_vs_S3600-LIVER-resent	chr1	170469511	170469511	C	G	Nos1ap	c.177+45104G>C	intron_variant	MODIFIER	transcript	54	0	0	91	39	0.438	SNP	6.31905
S3600-THY_vs_S3600-LIVER-resent	chr1	170504598	170504598	C	G	Nos1ap	c.177+10017G>C	intron_variant	MODIFIER	transcript	78	0	0	120	53	0.437	SNP	5.93324
S3600-THY_vs_S3600-LIVER-resent	chr1	170512182	170512182	C	G	Nos1ap	c.177+2433G>C	intron_variant	MODIFIER	transcript	77	0	0	90	40	0.449	SNP	5.96753
S3600-THY_vs_S3600-LIVER-resent	chr1	170512850	170512850	C	G	Nos1ap	c.177+1765G>C	intron_variant	MODIFIER	transcript	52	0	0	86	37	0.44	SNP	6.12205
S3600-THY_vs_S3600-LIVER-resent	chr1	170513563	170513563	C	G	Nos1ap	c.177+1052G>C	intron_variant	MODIFIER	transcript	66	0	0	92	44	0.489	SNP	5.79349
S3600-THY_vs_S3600-LIVER-resent	chr1	170527407	170527407	C	G	Nos1ap	c.106-12721G>C	intron_variant	MODIFIER	transcript	87	0	0	100	53	0.535	SNP	5.79963
S3600-THY_vs_S3600-LIVER-resent	chr1	171196447	171196447	G	C	Pcp4l1	c.-428C>G	upstream_gene_variant	MODIFIER	transcript	64	0	0	84	35	0.427	SNP	5.94064
S3600-THY_vs_S3600-LIVER-resent	chr1	171226314	171226314	G	C	Apoa2	c.*48G>C	3_prime_UTR_variant	MODIFIER	transcript	87	0	0	117	50	0.427	SNP	5.91347
S3600-THY_vs_S3600-LIVER-resent	chr1	171780541	171780541	C	G	Slamf1	c.715+3163C>G	intron_variant	MODIFIER	transcript	68	0	0	100	40	0.398	SNP	6.17123
S3600-THY_vs_S3600-LIVER-resent	chr1	171809624	171809624	G	C	Slamf1-Cd84	n.171809624G>C	intergenic_region	MODIFIER	intergenic_region	75	0	0	119	56	0.479	SNP	5.84802
S3600-THY_vs_S3600-LIVER-resent	chr1	171875032	171875032	A	G	Cd84	c.766+1593A>G	intron_variant	MODIFIER	transcript	68	0	0	93	25	0.269	SNP	6.1934
S3600-THY_vs_S3600-LIVER-resent	chr1	172184972	172184972	G	C	Dcaf8	c.1053-1324G>C	intron_variant	MODIFIER	transcript	70	0	0	115	23	0.2	SNP	4.9695
S3600-THY_vs_S3600-LIVER-resent	chr1	172552797	172552797	C	G	4933439K11Rik	n.-1991G>C	upstream_gene_variant	MODIFIER	transcript	61	0	0	90	37	0.416	SNP	6.14614
S3600-THY_vs_S3600-LIVER-resent	chr1	172681446	172681446	G	C	Dusp23-Crp	n.172681446G>C	intergenic_region	MODIFIER	intergenic_region	82	1	0.012	115	47	0.409	SNP	5.86221
S3600-THY_vs_S3600-LIVER-resent	chr1	172967432	172967432	G	GCTCTT	Olfr16-Olfr1408	n.172967432_172967433insCTCTT	intergenic_region	MODIFIER	intergenic_region	9	0	0	14	14	1	INSERTION.NumRepetitions_9.EventLength_5	5.91232
S3600-THY_vs_S3600-LIVER-resent	chr1	173020079	173020121	TTATATATATATATATATATATATATATATATATATATATATA	T	Olfr16-Olfr1408	n.173020080_173020121delTATATATATATATATATATATATATATATATATATATATATA	intergenic_region	MODIFIER	intergenic_region	9	0	0	18	15	0.833	DELETION.NumRepetitions_10orMore.EventLength_2.RepeatExpansion_TA	4.32846
S3600-THY_vs_S3600-LIVER-resent	chr1	173101281	173101281	C	G	Olfr16-Olfr1408	n.173101281C>G	intergenic_region	MODIFIER	intergenic_region	62	1	0.016	105	53	0.505	SNP	6.0304
S3600-THY_vs_S3600-LIVER-resent	chr1	173352041	173352041	C	G	Cadm3	c.83-5479G>C	intron_variant	MODIFIER	transcript	84	1	0.012	120	59	0.487	SNP	6.10182
S3600-THY_vs_S3600-LIVER-resent	chr1	173356957	173356957	C	G	Cadm3	c.83-10395G>C	intron_variant	MODIFIER	transcript	77	0	0	96	44	0.463	SNP	5.93554
S3600-THY_vs_S3600-LIVER-resent	chr1	173649981	173649981	C	G	Pyhin1	c.*3970C>G	downstream_gene_variant	MODIFIER	transcript	63	0	0	107	43	0.402	SNP	6.0452
S3600-THY_vs_S3600-LIVER-resent	chr1	173739404	173739404	C	G	AI607873	c.-21+2184G>C	intron_variant	MODIFIER	transcript	91	1	0.011	121	58	0.483	SNP	5.65017
S3600-THY_vs_S3600-LIVER-resent	chr1	174089918	174089918	C	G	Olfr429	c.877C>G	missense_variant	MODERATE	transcript	81	1	0.013	94	31	0.326	SNP	6.63424
S3600-THY_vs_S3600-LIVER-resent	chr1	174151593	174151593	C	G	Olfr421-ps1	c.76C>G	missense_variant	MODERATE	transcript	86	0	0	110	49	0.445	SNP	6.07899
S3600-THY_vs_S3600-LIVER-resent	chr1	174281825	174281825	C	G	Olfr419-Mptx1	n.174281825C>G	intergenic_region	MODIFIER	intergenic_region	70	0	0	114	50	0.434	SNP	6.03781
S3600-THY_vs_S3600-LIVER-resent	chr1	174443260	174443260	C	G	Olfr414-Olfr220	n.174443260C>G	intergenic_region	MODIFIER	intergenic_region	76	0	0	102	41	0.402	SNP	6.29136
S3600-THY_vs_S3600-LIVER-resent	chr1	174802553	174802554	TG	T	Fmn2	c.4628+11147delG	intron_variant	MODIFIER	transcript	26	0	0	58	23	0.397	DELETION.NumRepetitions_10orMore.EventLength_1.RepeatExpansion_G	4.37995
S3600-THY_vs_S3600-LIVER-resent	chr1	174829436	174829436	C	G	Grem2	c.*7339G>C	downstream_gene_variant	MODIFIER	transcript	71	0	0	110	55	0.491	SNP	6.03039
S3600-THY_vs_S3600-LIVER-resent	chr1	174836902	174836902	C	G	Grem2	c.380G>C	missense_variant	MODERATE	transcript	60	1	0.017	95	47	0.495	SNP	6.11302
S3600-THY_vs_S3600-LIVER-resent	chr1	174909711	174909711	C	G	Grem2	c.-2+11862G>C	intron_variant	MODIFIER	transcript	83	0	0	98	62	0.639	SNP	5.77539
S3600-THY_vs_S3600-LIVER-resent	chr1	174922655	174922655	C	G	Grem2	c.-85374G>C	upstream_gene_variant	MODIFIER	transcript	76	0	0	102	44	0.426	SNP	5.97642
S3600-THY_vs_S3600-LIVER-resent	chr1	175023798	175023798	C	G	Grem2-Rgs7	n.175023798C>G	intergenic_region	MODIFIER	intergenic_region	88	0	0	114	50	0.432	SNP	5.9936
S3600-THY_vs_S3600-LIVER-resent	chr1	175255392	175255392	C	G	Rgs7	c.175+15425G>C	intron_variant	MODIFIER	transcript	72	0	0	113	48	0.414	SNP	5.72771
S3600-THY_vs_S3600-LIVER-resent	chr1	175425299	175425299	C	G	Rgs7	c.78+65754G>C	intron_variant	MODIFIER	transcript	77	0	0	105	43	0.417	SNP	5.88827
S3600-THY_vs_S3600-LIVER-resent	chr1	175454909	175454909	C	G	Rgs7	c.78+36144G>C	intron_variant	MODIFIER	transcript	80	1	0.013	123	69	0.557	SNP	5.99125
S3600-THY_vs_S3600-LIVER-resent	chr1	175485396	175485396	C	G	Rgs7	c.78+5657G>C	intron_variant	MODIFIER	transcript	74	0	0	110	60	0.55	SNP	6.02081
S3600-THY_vs_S3600-LIVER-resent	chr1	175869796	175869796	C	G	Wdr64-Exo1	n.175869796C>G	intergenic_region	MODIFIER	intergenic_region	70	1	0.014	99	40	0.404	SNP	5.98016
S3600-THY_vs_S3600-LIVER-resent	chr1	175911644	175911644	C	G	Exo1	c.*3079C>G	downstream_gene_variant	MODIFIER	transcript	87	0	0	112	47	0.423	SNP	5.82501
S3600-THY_vs_S3600-LIVER-resent	chr1	176150600	176150600	C	G	Pld5	c.190-10502G>C	intron_variant	MODIFIER	transcript	78	0	0	106	52	0.495	SNP	5.99565
S3600-THY_vs_S3600-LIVER-resent	chr1	176306911	176306911	C	G	Pld5-Cep170	n.176306911C>G	intergenic_region	MODIFIER	intergenic_region	60	0	0	95	48	0.505	SNP	6.11302
S3600-THY_vs_S3600-LIVER-resent	chr1	176337072	176337072	C	T	Pld5-Cep170	n.176337072C>T	intergenic_region	MODIFIER	intergenic_region	86	0	0	128	79	0.616	SNP	5.86493
S3600-THY_vs_S3600-LIVER-resent	chr1	176478253	176478253	C	G	Pld5-Cep170	n.176478253C>G	intergenic_region	MODIFIER	intergenic_region	70	0	0	109	47	0.435	SNP	5.82659
S3600-THY_vs_S3600-LIVER-resent	chr1	176484113	176484113	C	G	Pld5-Cep170	n.176484113C>G	intergenic_region	MODIFIER	intergenic_region	38	0	0	66	23	0.348	SNP	5.00735
S3600-THY_vs_S3600-LIVER-resent	chr1	176580100	176580100	C	G	Pld5-Cep170	n.176580100C>G	intergenic_region	MODIFIER	intergenic_region	74	0	0	102	56	0.55	SNP	5.86881
S3600-THY_vs_S3600-LIVER-resent	chr1	176598474	176598475	AT	A	Pld5-Cep170	n.176598475delT	intergenic_region	MODIFIER	intergenic_region	69	1	0.015	134	67	0.5	DELETION.NumRepetitions_9.EventLength_1.RepeatExpansion_T	5.80156
S3600-THY_vs_S3600-LIVER-resent	chr1	176620235	176620235	C	G	Pld5-Cep170	n.176620235C>G	intergenic_region	MODIFIER	intergenic_region	83	0	0	102	34	0.333	SNP	5.74347
S3600-THY_vs_S3600-LIVER-resent	chr1	176646438	176646438	C	G	Pld5-Cep170	n.176646438C>G	intergenic_region	MODIFIER	intergenic_region	75	0	0	120	59	0.487	SNP	5.66629
S3600-THY_vs_S3600-LIVER-resent	chr1	176689056	176689056	C	G	Pld5-Cep170	n.176689056C>G	intergenic_region	MODIFIER	intergenic_region	64	0	0	108	53	0.486	SNP	5.91306
S3600-THY_vs_S3600-LIVER-resent	chr1	177245747	177245747	C	G	Akt3	c.46+2929G>C	intron_variant	MODIFIER	transcript	77	0	0	122	53	0.442	SNP	6.00269
S3600-THY_vs_S3600-LIVER-resent	chr1	177295043	177295043	G	C	Akt3-Zbtb18	n.177295043G>C	intergenic_region	MODIFIER	intergenic_region	96	0	0	115	52	0.447	SNP	6.01394
S3600-THY_vs_S3600-LIVER-resent	chr1	177295281	177295281	C	G	Akt3-Zbtb18	n.177295281C>G	intergenic_region	MODIFIER	intergenic_region	79	0	0	92	45	0.495	SNP	5.85043
S3600-THY_vs_S3600-LIVER-resent	chr1	177309585	177309585	C	G	Akt3-Zbtb18	n.177309585C>G	intergenic_region	MODIFIER	intergenic_region	53	0	0	113	47	0.423	SNP	6.1746
S3600-THY_vs_S3600-LIVER-resent	chr1	177390949	177390949	C	G	Akt3-Zbtb18	n.177390949C>G	intergenic_region	MODIFIER	intergenic_region	64	0	0	105	48	0.457	SNP	6.39346
S3600-THY_vs_S3600-LIVER-resent	chr1	177542136	177542136	C	G	Zbtb18-2310043L19Rik	n.177542136C>G	intergenic_region	MODIFIER	intergenic_region	76	0	0	124	63	0.512	SNP	5.75224
S3600-THY_vs_S3600-LIVER-resent	chr1	177543825	177543825	C	A	Zbtb18-2310043L19Rik	n.177543825C>A	intergenic_region	MODIFIER	intergenic_region	73	1	0.014	111	58	0.523	SNP	6.08731
S3600-THY_vs_S3600-LIVER-resent	chr1	177692601	177692601	G	C	2310043L19Rik-1700016C15Rik	n.177692601G>C	intergenic_region	MODIFIER	intergenic_region	63	0	0	98	52	0.536	SNP	6.11173
S3600-THY_vs_S3600-LIVER-resent	chr1	177807622	177807622	C	G	Adss-Gm16432	n.177807622C>G	intergenic_region	MODIFIER	intergenic_region	70	1	0.014	103	48	0.466	SNP	6.02006
S3600-THY_vs_S3600-LIVER-resent	chr1	177827515	177827515	C	G	Adss-Gm16432	n.177827515C>G	intergenic_region	MODIFIER	intergenic_region	56	0	0	101	45	0.449	SNP	6.12183
S3600-THY_vs_S3600-LIVER-resent	chr1	177908450	177908450	C	G	Adss-Gm16432	n.177908450C>G	intergenic_region	MODIFIER	intergenic_region	60	0	0	110	56	0.509	SNP	5.92668
S3600-THY_vs_S3600-LIVER-resent	chr1	177963305	177963305	C	G	Adss-Gm16432	n.177963305C>G	intergenic_region	MODIFIER	intergenic_region	37	0	0	56	22	0.393	SNP	5.65831
S3600-THY_vs_S3600-LIVER-resent	chr1	177999413	177999413	C	G	Gm16432	c.69-3582C>G	intron_variant	MODIFIER	transcript	77	0	0	134	63	0.47	SNP	5.7508
S3600-THY_vs_S3600-LIVER-resent	chr1	178034407	178034407	C	A	Gm16432	c.327-5902C>A	intron_variant	MODIFIER	transcript	54	0	0	91	45	0.495	SNP	6.08339
S3600-THY_vs_S3600-LIVER-resent	chr1	178248334	178248334	G	C	Desi2	c.352-901G>C	intron_variant	MODIFIER	transcript	44	0	0	62	16	0.258	SNP	3.8631
S3600-THY_vs_S3600-LIVER-resent	chr1	178588299	178588299	A	ACTAT	Kif26b	c.465+57509_465+57510insCTAT	intron_variant	MODIFIER	transcript	55	1	0.018	56	22	0.4	INSERTION.NumRepetitions_10orMore.EventLength_4	6.2738
S3600-THY_vs_S3600-LIVER-resent	chr1	178881480	178881480	C	T	Kif26b	c.2099-2435C>T	intron_variant	MODIFIER	transcript	75	0	0	105	53	0.505	SNP	5.98181
S3600-THY_vs_S3600-LIVER-resent	chr1	178927104	178927104	G	GAAGAAAGA	Kif26b	c.5837-1055_5837-1054insAAGAAAGA	intron_variant	MODIFIER	transcript	10	0	0	31	31	1	INSERTION.NumRepetitions_10orMore.EventLength_4	6.55688
S3600-THY_vs_S3600-LIVER-resent	chr1	179275134	179275134	C	G	Smyd3	c.531+130149G>C	intron_variant	MODIFIER	transcript	78	0	0	117	58	0.504	SNP	6.0133
S3600-THY_vs_S3600-LIVER-resent	chr1	179818657	179818657	G	C	Ahctf1-Cdc42bpa	n.179818657G>C	intergenic_region	MODIFIER	intergenic_region	105	0	0	112	26	0.231	SNP	6.04397
S3600-THY_vs_S3600-LIVER-resent	chr1	180288122	180288122	G	C	Psen2-Gm5069	n.180288122G>C	intergenic_region	MODIFIER	intergenic_region	110	0	0	127	63	0.504	SNP	5.79271
S3600-THY_vs_S3600-LIVER-resent	chr1	180316371	180316371	G	C	Psen2-Gm5069	n.180316371G>C	intergenic_region	MODIFIER	intergenic_region	95	0	0	122	37	0.297	SNP	6.09514
S3600-THY_vs_S3600-LIVER-resent	chr1	180355927	180355927	G	C	Itpkb	c.1920+21697G>C	intron_variant	MODIFIER	transcript	106	0	0	121	25	0.202	SNP	6.15192
S3600-THY_vs_S3600-LIVER-resent	chr1	180379383	180379383	G	C	Itpkb	c.1921-33291G>C	intron_variant	MODIFIER	transcript	106	1	0.009434	126	60	0.472	SNP	5.63555
S3600-THY_vs_S3600-LIVER-resent	chr1	180531362	180531362	G	C	Stum-Parp1	n.180531362G>C	intergenic_region	MODIFIER	intergenic_region	71	0	0	120	48	0.407	SNP	6.19206
S3600-THY_vs_S3600-LIVER-resent	chr1	180620834	180620834	G	T	Parp1-Lin9	n.180620834G>T	intergenic_region	MODIFIER	intergenic_region	78	0	0	114	53	0.46	SNP	5.95737
S3600-THY_vs_S3600-LIVER-resent	chr1	180621669	180621669	G	C	Parp1-Lin9	n.180621669G>C	intergenic_region	MODIFIER	intergenic_region	45	0	0	80	37	0.463	SNP	5.91682
S3600-THY_vs_S3600-LIVER-resent	chr1	180623373	180623373	G	C	Parp1-Lin9	n.180623373G>C	intergenic_region	MODIFIER	intergenic_region	66	1	0.015	116	56	0.482	SNP	6.09139
S3600-THY_vs_S3600-LIVER-resent	chr1	180708954	180708954	C	G	Mixl1-Acbd3	n.180708954C>G	intergenic_region	MODIFIER	intergenic_region	100	0	0	127	76	0.598	SNP	5.97099
S3600-THY_vs_S3600-LIVER-resent	chr1	180819153	180819153	C	T	H3f3a-Sde2	n.180819153C>T	intergenic_region	MODIFIER	intergenic_region	111	0	0	116	33	0.289	SNP	6.08717
S3600-THY_vs_S3600-LIVER-resent	chr1	180894240	180894240	G	C	Lefty2	c.356G>C	missense_variant	MODERATE	transcript	93	0	0	99	49	0.5	SNP	6.04033
S3600-THY_vs_S3600-LIVER-resent	chr1	180899122	180899122	G	C	Lefty2	c.*1309G>C	downstream_gene_variant	MODIFIER	transcript	119	0	0	120	57	0.475	SNP	6.15794
S3600-THY_vs_S3600-LIVER-resent	chr1	180948675	180948675	G	C	Tmem63a	c.187-138G>C	intron_variant	MODIFIER	transcript	82	0	0	116	25	0.217	SNP	6.0621
S3600-THY_vs_S3600-LIVER-resent	chr1	180994184	180994184	G	C	Ephx1	c.723-97C>G	intron_variant	MODIFIER	transcript	50	0	0	81	46	0.568	SNP	5.84272
S3600-THY_vs_S3600-LIVER-resent	chr1	180998044	180998044	C	CACAGCATCCTGCACACAGTCAGCATCTCCCCACG	Ephx1	c.364+1678_364+1679insCGTGGGGAGATGCTGACTGTGTGCAGGATGCTGT	intron_variant	MODIFIER	transcript	30	0	0	33	11	0.45	INSERTION.NumRepetitions_1.EventLength_10orMore	3.39469
S3600-THY_vs_S3600-LIVER-resent	chr1	180998877	180998877	G	C	Ephx1	c.364+846C>G	intron_variant	MODIFIER	transcript	106	0	0	124	59	0.476	SNP	6.10968
S3600-THY_vs_S3600-LIVER-resent	chr1	181100879	181100879	G	C	Nvl	c.2286+650C>G	intron_variant	MODIFIER	transcript	67	0	0	111	22	0.202	SNP	4.67528
S3600-THY_vs_S3600-LIVER-resent	chr1	181207066	181207066	G	C	Wdr26	c.567+1937C>G	intron_variant	MODIFIER	transcript	69	0	0	104	27	0.252	SNP	6.36381
S3600-THY_vs_S3600-LIVER-resent	chr1	181210342	181210342	C	G	Wdr26	c.362+734G>C	intron_variant	MODIFIER	transcript	85	0	0	116	54	0.47	SNP	5.73276
S3600-THY_vs_S3600-LIVER-resent	chr1	181260338	181260338	G	C	Wdr26-Cnih3	n.181260338G>C	intergenic_region	MODIFIER	intergenic_region	97	0	0	101	44	0.436	SNP	6.08449
S3600-THY_vs_S3600-LIVER-resent	chr1	181289820	181289820	G	A	Wdr26-Cnih3	n.181289820G>A	intergenic_region	MODIFIER	intergenic_region	82	0	0	95	40	0.415	SNP	5.85363
S3600-THY_vs_S3600-LIVER-resent	chr1	181314756	181314756	G	C	Wdr26-Cnih3	n.181314756G>C	intergenic_region	MODIFIER	intergenic_region	92	0	0	104	54	0.519	SNP	6.03673
S3600-THY_vs_S3600-LIVER-resent	chr1	181326335	181326335	G	C	Wdr26-Cnih3	n.181326335G>C	intergenic_region	MODIFIER	intergenic_region	70	0	0	97	37	0.385	SNP	6.0132
S3600-THY_vs_S3600-LIVER-resent	chr1	181527972	181527972	C	G	Ccdc121-Lbr	n.181527972C>G	intergenic_region	MODIFIER	intergenic_region	92	0	0	104	53	0.505	SNP	5.73365
S3600-THY_vs_S3600-LIVER-resent	chr1	181560409	181560409	C	G	Ccdc121-Lbr	n.181560409C>G	intergenic_region	MODIFIER	intergenic_region	83	0	0	109	61	0.56	SNP	5.74131
S3600-THY_vs_S3600-LIVER-resent	chr1	183129378	183129378	G	C	Disp1	c.506+5977C>G	intron_variant	MODIFIER	transcript	100	1	0.01	122	26	0.213	SNP	5.89124
S3600-THY_vs_S3600-LIVER-resent	chr1	183348255	183348255	G	C	Mia3	c.3474+2709C>G	intron_variant	MODIFIER	transcript	78	0	0	133	61	0.455	SNP	6.21297
S3600-THY_vs_S3600-LIVER-resent	chr1	183659781	183659781	A	AATCT	Hhipl2-1700056E22Rik	n.183659781_183659782insATCT	intergenic_region	MODIFIER	intergenic_region	14	1	0	17	17	1	INSERTION.NumRepetitions_10orMore.EventLength_4	7.16827
S3600-THY_vs_S3600-LIVER-resent	chr1	184078409	184078409	G	C	Dusp10	c.*3886G>C	downstream_gene_variant	MODIFIER	transcript	80	0	0	130	66	0.512	SNP	6.22715
S3600-THY_vs_S3600-LIVER-resent	chr1	184081172	184081172	G	C	Dusp10-1700112H15Rik	n.184081172G>C	intergenic_region	MODIFIER	intergenic_region	66	0	0	100	46	0.459	SNP	5.97064
S3600-THY_vs_S3600-LIVER-resent	chr1	184082596	184082596	G	C	Dusp10-1700112H15Rik	n.184082596G>C	intergenic_region	MODIFIER	intergenic_region	84	0	0	134	69	0.511	SNP	5.87395
S3600-THY_vs_S3600-LIVER-resent	chr1	184088561	184088561	G	C	Dusp10-1700112H15Rik	n.184088561G>C	intergenic_region	MODIFIER	intergenic_region	68	0	0	119	57	0.478	SNP	6.00749
S3600-THY_vs_S3600-LIVER-resent	chr1	184095988	184095988	C	G	Dusp10-1700112H15Rik	n.184095988C>G	intergenic_region	MODIFIER	intergenic_region	61	0	0	126	34	0.27	SNP	6.09332
S3600-THY_vs_S3600-LIVER-resent	chr1	184096515	184096515	G	C	Dusp10-1700112H15Rik	n.184096515G>C	intergenic_region	MODIFIER	intergenic_region	72	0	0	123	65	0.528	SNP	5.801
S3600-THY_vs_S3600-LIVER-resent	chr1	184107469	184107469	C	T	Dusp10-1700112H15Rik	n.184107469C>T	intergenic_region	MODIFIER	intergenic_region	81	0	0	127	28	0.22	SNP	6.02213
S3600-THY_vs_S3600-LIVER-resent	chr1	184169001	184169001	G	A	Dusp10-1700112H15Rik	n.184169001G>A	intergenic_region	MODIFIER	intergenic_region	69	0	0	108	48	0.444	SNP	5.80373
S3600-THY_vs_S3600-LIVER-resent	chr1	184182313	184182313	C	G	Dusp10-1700112H15Rik	n.184182313C>G	intergenic_region	MODIFIER	intergenic_region	57	0	0	125	41	0.336	SNP	6.18438
S3600-THY_vs_S3600-LIVER-resent	chr1	184378897	184378897	G	T	Dusp10-1700112H15Rik	n.184378897G>T	intergenic_region	MODIFIER	intergenic_region	83	0	0	154	47	0.309	SNP	6.06688
S3600-THY_vs_S3600-LIVER-resent	chr1	184404132	184404132	G	C	Dusp10-1700112H15Rik	n.184404132G>C	intergenic_region	MODIFIER	intergenic_region	76	0	0	97	40	0.415	SNP	5.89262
S3600-THY_vs_S3600-LIVER-resent	chr1	184525776	184525776	C	G	1700112H15Rik	n.*2065G>C	downstream_gene_variant	MODIFIER	transcript	61	1	0.017	126	62	0.5	SNP	6.01239
S3600-THY_vs_S3600-LIVER-resent	chr1	184578158	184578158	C	G	1700112H15Rik-4930488B22Rik	n.184578158C>G	intergenic_region	MODIFIER	intergenic_region	79	0	0	128	58	0.46	SNP	5.98842
S3600-THY_vs_S3600-LIVER-resent	chr1	184617882	184617882	C	G	1700112H15Rik-4930488B22Rik	n.184617882C>G	intergenic_region	MODIFIER	intergenic_region	62	0	0	106	49	0.467	SNP	6.40592
S3600-THY_vs_S3600-LIVER-resent	chr1	184648511	184648511	C	T	1700112H15Rik-4930488B22Rik	n.184648511C>T	intergenic_region	MODIFIER	intergenic_region	61	0	0	92	44	0.478	SNP	5.86208
S3600-THY_vs_S3600-LIVER-resent	chr1	184666314	184666314	C	G	1700112H15Rik-4930488B22Rik	n.184666314C>G	intergenic_region	MODIFIER	intergenic_region	58	0	0	105	57	0.543	SNP	6.03886
S3600-THY_vs_S3600-LIVER-resent	chr1	184677090	184677090	A	G	1700112H15Rik-4930488B22Rik	n.184677090A>G	intergenic_region	MODIFIER	intergenic_region	56	0	0	87	23	0.262	SNP	5.48412
S3600-THY_vs_S3600-LIVER-resent	chr1	184789729	184789729	T	G	2021-03-01	c.897-1888A>C	intron_variant	MODIFIER	transcript	79	1	0.013	115	55	0.478	SNP	5.73541
S3600-THY_vs_S3600-LIVER-resent	chr1	184801256	184801256	C	G	2021-03-01	c.762+646G>C	intron_variant	MODIFIER	transcript	70	0	0	105	51	0.486	SNP	5.91611
S3600-THY_vs_S3600-LIVER-resent	chr1	184817320	184817320	C	G	2021-03-02	c.*20+1881G>C	intron_variant	MODIFIER	transcript	91	0	0	105	44	0.417	SNP	6.13363
S3600-THY_vs_S3600-LIVER-resent	chr1	184935341	184935341	C	G	Mark1	c.310-5971G>C	intron_variant	MODIFIER	transcript	75	0	0	109	48	0.44	SNP	5.93656
S3600-THY_vs_S3600-LIVER-resent	chr1	185055312	185055312	C	G	Mark1-Rab3gap2	n.185055312C>G	intergenic_region	MODIFIER	intergenic_region	71	1	0.014	105	44	0.423	SNP	6.44811
S3600-THY_vs_S3600-LIVER-resent	chr1	185093967	185093967	C	T	Mark1-Rab3gap2	n.185093967C>T	intergenic_region	MODIFIER	intergenic_region	69	0	0	107	41	0.39	SNP	6.05971
S3600-THY_vs_S3600-LIVER-resent	chr1	185140287	185140287	C	G	Mark1-Rab3gap2	n.185140287C>G	intergenic_region	MODIFIER	intergenic_region	94	0	0	99	44	0.444	SNP	6.13317
S3600-THY_vs_S3600-LIVER-resent	chr1	185147106	185147106	C	G	Mark1-Rab3gap2	n.185147106C>G	intergenic_region	MODIFIER	intergenic_region	71	1	0.014	109	49	0.444	SNP	5.87995
S3600-THY_vs_S3600-LIVER-resent	chr1	185444887	185444887	C	G	9630028B13Rik	n.-3068G>C	upstream_gene_variant	MODIFIER	transcript	90	0	0	127	60	0.476	SNP	5.93877
S3600-THY_vs_S3600-LIVER-resent	chr1	185887293	185887293	C	G	Mir297c	n.52+680C>G	intron_variant	MODIFIER	transcript	74	0	0	103	44	0.426	SNP	5.96644
S3600-THY_vs_S3600-LIVER-resent	chr1	186826027	186826027	C	G	Rrp15-D1Pas1	n.186826027C>G	intergenic_region	MODIFIER	intergenic_region	61	0	0	99	51	0.52	SNP	5.82244
S3600-THY_vs_S3600-LIVER-resent	chr1	186887243	186887243	C	G	Rrp15-D1Pas1	n.186887243C>G	intergenic_region	MODIFIER	intergenic_region	71	0	0	91	42	0.456	SNP	5.86082
S3600-THY_vs_S3600-LIVER-resent	chr1	187002282	187002282	C	G	D1Pas1-Spata17	n.187002282C>G	intergenic_region	MODIFIER	intergenic_region	68	1	0.015	96	40	0.419	SNP	6.03264
S3600-THY_vs_S3600-LIVER-resent	chr1	187348471	187348471	C	G	Gpatch2	c.1478C>G	missense_variant	MODERATE	transcript	75	0	0	120	57	0.475	SNP	6.14335
S3600-THY_vs_S3600-LIVER-resent	chr1	187663675	187663675	C	G	Esrrg	n.187663675C>G	intragenic_variant	MODIFIER	gene_variant	70	0	0	113	49	0.438	SNP	6.04437
S3600-THY_vs_S3600-LIVER-resent	chr1	187676834	187676834	C	T	Esrrg	n.187676834C>T	intragenic_variant	MODIFIER	gene_variant	77	0	0	115	48	0.417	SNP	5.99421
S3600-THY_vs_S3600-LIVER-resent	chr1	187744856	187744856	A	C	Esrrg	n.187744856A>C	intragenic_variant	MODIFIER	gene_variant	22	0	0	13	13	1	SNP	6.7113
S3600-THY_vs_S3600-LIVER-resent	chr1	187914613	187914613	C	G	Esrrg	n.187914613C>G	intragenic_variant	MODIFIER	gene_variant	74	1	0.014	107	42	0.396	SNP	6.13997
S3600-THY_vs_S3600-LIVER-resent	chr1	187989410	187989410	C	T	Esrrg	n.187989410C>T	intragenic_variant	MODIFIER	gene_variant	73	0	0	103	59	0.574	SNP	6.11784
S3600-THY_vs_S3600-LIVER-resent	chr1	188082785	188082785	C	G	Esrrg	c.589+16328C>G	intron_variant	MODIFIER	transcript	77	0	0	91	40	0.444	SNP	5.97295
S3600-THY_vs_S3600-LIVER-resent	chr1	188183846	188183846	C	G	Esrrg	c.863-14730C>G	intron_variant	MODIFIER	transcript	74	1	0.014	116	52	0.448	SNP	6.08525
S3600-THY_vs_S3600-LIVER-resent	chr1	188333571	188333572	TA	T	Ush2a	c.775+14479delA	intron_variant	MODIFIER	transcript	33	0	0	64	17	0.266	DELETION.NumRepetitions_9.EventLength_1.RepeatExpansion_A	3.32697
S3600-THY_vs_S3600-LIVER-resent	chr1	188352155	188352155	T	TTATATA	Ush2a	c.839+1055_839+1056insTATATA	intron_variant	MODIFIER	transcript	11	0	0	11	11	1	INSERTION.NumRepetitions_10orMore.EventLength_2.RepeatExpansion_TA	5.54743
S3600-THY_vs_S3600-LIVER-resent	chr1	188524470	188524470	C	G	Ush2a	c.4731+1012C>G	intron_variant	MODIFIER	transcript	72	0	0	101	53	0.52	SNP	6.08861
S3600-THY_vs_S3600-LIVER-resent	chr1	188580264	188580264	C	G	Ush2a	c.6298+1738C>G	intron_variant	MODIFIER	transcript	67	0	0	90	42	0.461	SNP	5.89767
S3600-THY_vs_S3600-LIVER-resent	chr1	188665240	188665240	C	G	Ush2a	c.7093+10518C>G	intron_variant	MODIFIER	transcript	78	0	0	112	52	0.458	SNP	5.97284
S3600-THY_vs_S3600-LIVER-resent	chr1	188758932	188758932	C	G	Ush2a	c.9232-815C>G	intron_variant	MODIFIER	transcript	74	0	0	110	47	0.415	SNP	6.13755
S3600-THY_vs_S3600-LIVER-resent	chr1	188877010	188877010	C	A	Ush2a	c.12042+2059C>A	intron_variant	MODIFIER	transcript	63	0	0	88	41	0.46	SNP	6.19397
S3600-THY_vs_S3600-LIVER-resent	chr1	188877875	188877875	C	G	Ush2a	c.12042+2924C>G	intron_variant	MODIFIER	transcript	83	0	0	129	67	0.519	SNP	6.08515
S3600-THY_vs_S3600-LIVER-resent	chr1	188889177	188889177	C	G	Ush2a	c.12042+14226C>G	intron_variant	MODIFIER	transcript	67	0	0	98	47	0.485	SNP	6.37183
S3600-THY_vs_S3600-LIVER-resent	chr1	188914122	188914122	C	T	Ush2a	c.13788-1865C>T	intron_variant	MODIFIER	transcript	64	1	0.016	108	51	0.467	SNP	6.04557
S3600-THY_vs_S3600-LIVER-resent	chr1	188919888	188919888	C	G	Ush2a	c.14109+3580C>G	intron_variant	MODIFIER	transcript	75	1	0.014	117	55	0.474	SNP	5.81875
S3600-THY_vs_S3600-LIVER-resent	chr1	188923002	188923002	C	G	Ush2a	c.14109+6694C>G	intron_variant	MODIFIER	transcript	88	1	0.011	122	54	0.442	SNP	5.95882
S3600-THY_vs_S3600-LIVER-resent	chr1	188930505	188930505	C	G	Ush2a	c.14110-14097C>G	intron_variant	MODIFIER	transcript	71	0	0	119	57	0.474	SNP	5.84744
S3600-THY_vs_S3600-LIVER-resent	chr1	189109106	189109106	C	G	Kctd3-Kcnk2	n.189109106C>G	intergenic_region	MODIFIER	intergenic_region	73	0	0	120	58	0.487	SNP	6.14853
S3600-THY_vs_S3600-LIVER-resent	chr1	189114715	189114715	C	G	Kctd3-Kcnk2	n.189114715C>G	intergenic_region	MODIFIER	intergenic_region	74	0	0	101	41	0.406	SNP	5.8894
S3600-THY_vs_S3600-LIVER-resent	chr1	189131471	189131471	C	G	Kctd3-Kcnk2	n.189131471C>G	intergenic_region	MODIFIER	intergenic_region	71	1	0.014	103	41	0.398	SNP	5.87771
S3600-THY_vs_S3600-LIVER-resent	chr1	189146710	189146710	C	G	Kctd3-Kcnk2	n.189146710C>G	intergenic_region	MODIFIER	intergenic_region	70	0	0	119	58	0.487	SNP	5.87242
S3600-THY_vs_S3600-LIVER-resent	chr1	189202937	189202937	C	A	Kcnk2	c.*6853G>T	downstream_gene_variant	MODIFIER	transcript	76	0	0	104	43	0.413	SNP	5.92133
S3600-THY_vs_S3600-LIVER-resent	chr1	189223451	189223451	C	T	Kcnk2	c.964-13344G>A	intron_variant	MODIFIER	transcript	66	0	0	117	62	0.53	SNP	6.17392
S3600-THY_vs_S3600-LIVER-resent	chr1	189334521	189334521	C	G	Kcnk2	c.357+5264G>C	intron_variant	MODIFIER	transcript	61	0	0	138	67	0.478	SNP	5.8573
S3600-THY_vs_S3600-LIVER-resent	chr1	189417871	189417871	C	G	Kcnk2-Cenpf	n.189417871C>G	intergenic_region	MODIFIER	intergenic_region	59	0	0	96	54	0.568	SNP	5.74949
S3600-THY_vs_S3600-LIVER-resent	chr1	189552832	189552832	G	T	Kcnk2-Cenpf	n.189552832G>T	intergenic_region	MODIFIER	intergenic_region	66	0	0	108	51	0.476	SNP	6.04509
S3600-THY_vs_S3600-LIVER-resent	chr1	189687316	189687316	C	G	Cenpf	c.-33+660G>C	intron_variant	MODIFIER	transcript	83	0	0	123	35	0.287	SNP	6.0137
S3600-THY_vs_S3600-LIVER-resent	chr1	189828048	189828048	G	C	Ptpn14	c.510+2951G>C	intron_variant	MODIFIER	transcript	89	0	0	117	62	0.534	SNP	5.88152
S3600-THY_vs_S3600-LIVER-resent	chr1	189933052	189933052	G	C	Smyd2-Prox1	n.189933052G>C	intergenic_region	MODIFIER	intergenic_region	58	0	0	107	41	0.394	SNP	6.01649
S3600-THY_vs_S3600-LIVER-resent	chr1	190180739	190180739	C	G	Prox1-Rps6kc1	n.190180739C>G	intergenic_region	MODIFIER	intergenic_region	50	0	0	109	52	0.472	SNP	5.87062
S3600-THY_vs_S3600-LIVER-resent	chr1	190186040	190186040	C	G	Prox1-Rps6kc1	n.190186040C>G	intergenic_region	MODIFIER	intergenic_region	82	1	0.012	120	62	0.521	SNP	5.96543
S3600-THY_vs_S3600-LIVER-resent	chr1	190249243	190249243	C	G	Prox1-Rps6kc1	n.190249243C>G	intergenic_region	MODIFIER	intergenic_region	64	1	0.016	122	61	0.5	SNP	5.86219
S3600-THY_vs_S3600-LIVER-resent	chr1	190255199	190255199	C	G	Prox1-Rps6kc1	n.190255199C>G	intergenic_region	MODIFIER	intergenic_region	69	0	0	102	50	0.49	SNP	6.05788
S3600-THY_vs_S3600-LIVER-resent	chr1	190259054	190259054	C	G	Prox1-Rps6kc1	n.190259054C>G	intergenic_region	MODIFIER	intergenic_region	62	0	0	122	45	0.369	SNP	5.91115
S3600-THY_vs_S3600-LIVER-resent	chr1	190260791	190260791	C	G	Prox1-Rps6kc1	n.190260791C>G	intergenic_region	MODIFIER	intergenic_region	53	0	0	124	61	0.488	SNP	6.12181
S3600-THY_vs_S3600-LIVER-resent	chr1	190388251	190388251	C	G	Prox1-Rps6kc1	n.190388251C>G	intergenic_region	MODIFIER	intergenic_region	63	0	0	108	46	0.43	SNP	5.75708
S3600-THY_vs_S3600-LIVER-resent	chr1	190435658	190435658	C	G	Prox1-Rps6kc1	n.190435658C>G	intergenic_region	MODIFIER	intergenic_region	70	0	0	115	53	0.461	SNP	5.81175
S3600-THY_vs_S3600-LIVER-resent	chr1	190444376	190444376	C	G	Prox1-Rps6kc1	n.190444376C>G	intergenic_region	MODIFIER	intergenic_region	69	0	0	110	48	0.435	SNP	5.80654
S3600-THY_vs_S3600-LIVER-resent	chr1	190532770	190532770	C	G	Prox1-Rps6kc1	n.190532770C>G	intergenic_region	MODIFIER	intergenic_region	77	0	0	96	43	0.448	SNP	5.97261
S3600-THY_vs_S3600-LIVER-resent	chr1	190547514	190547514	C	G	Prox1-Rps6kc1	n.190547514C>G	intergenic_region	MODIFIER	intergenic_region	89	0	0	103	39	0.382	SNP	5.83583
S3600-THY_vs_S3600-LIVER-resent	chr1	190583878	190583878	C	G	Prox1-Rps6kc1	n.190583878C>G	intergenic_region	MODIFIER	intergenic_region	75	0	0	93	47	0.505	SNP	6.08798
S3600-THY_vs_S3600-LIVER-resent	chr1	190594984	190594984	C	G	Prox1-Rps6kc1	n.190594984C>G	intergenic_region	MODIFIER	intergenic_region	69	0	0	111	41	0.373	SNP	6.01538
S3600-THY_vs_S3600-LIVER-resent	chr1	190598522	190598522	C	G	Prox1-Rps6kc1	n.190598522C>G	intergenic_region	MODIFIER	intergenic_region	89	0	0	106	45	0.419	SNP	6.02152
S3600-THY_vs_S3600-LIVER-resent	chr1	190623748	190623748	C	G	Prox1-Rps6kc1	n.190623748C>G	intergenic_region	MODIFIER	intergenic_region	50	0	0	101	54	0.53	SNP	6.1941
S3600-THY_vs_S3600-LIVER-resent	chr1	190642747	190642747	C	G	Prox1-Rps6kc1	n.190642747C>G	intergenic_region	MODIFIER	intergenic_region	56	1	0.018	98	44	0.438	SNP	6.02115
S3600-THY_vs_S3600-LIVER-resent	chr1	190655055	190655055	C	G	Prox1-Rps6kc1	n.190655055C>G	intergenic_region	MODIFIER	intergenic_region	63	0	0	119	59	0.492	SNP	6.09776
S3600-THY_vs_S3600-LIVER-resent	chr1	190669113	190669113	C	A	Prox1-Rps6kc1	n.190669113C>A	intergenic_region	MODIFIER	intergenic_region	74	0	0	107	48	0.449	SNP	5.66594
S3600-THY_vs_S3600-LIVER-resent	chr1	190698413	190698413	C	G	Prox1-Rps6kc1	n.190698413C>G	intergenic_region	MODIFIER	intergenic_region	65	0	0	119	47	0.395	SNP	6.06269
S3600-THY_vs_S3600-LIVER-resent	chr1	190732852	190732852	C	G	Prox1-Rps6kc1	n.190732852C>G	intergenic_region	MODIFIER	intergenic_region	76	0	0	114	51	0.442	SNP	6.14603
S3600-THY_vs_S3600-LIVER-resent	chr1	190746525	190746525	C	G	Prox1-Rps6kc1	n.190746525C>G	intergenic_region	MODIFIER	intergenic_region	87	1	0.012	143	72	0.507	SNP	6.02057
S3600-THY_vs_S3600-LIVER-resent	chr1	190748652	190748652	C	G	Prox1-Rps6kc1	n.190748652C>G	intergenic_region	MODIFIER	intergenic_region	77	0	0	98	43	0.439	SNP	6.04419
S3600-THY_vs_S3600-LIVER-resent	chr1	190803739	190803739	G	C	Rps6kc1	c.1223-3158C>G	intron_variant	MODIFIER	transcript	93	0	0	128	27	0.206	SNP	6.65425
S3600-THY_vs_S3600-LIVER-resent	chr1	191408527	191408527	G	C	Ppp2r5a-Dtl	n.191408527G>C	intergenic_region	MODIFIER	intergenic_region	87	0	0	134	59	0.44	SNP	5.72165
S3600-THY_vs_S3600-LIVER-resent	chr1	191422037	191422037	G	C	Ppp2r5a-Dtl	n.191422037G>C	intergenic_region	MODIFIER	intergenic_region	74	0	0	113	52	0.46	SNP	6.15764
S3600-THY_vs_S3600-LIVER-resent	chr1	191423804	191423804	G	C	Ppp2r5a-Dtl	n.191423804G>C	intergenic_region	MODIFIER	intergenic_region	85	0	0	89	48	0.539	SNP	5.93766
S3600-THY_vs_S3600-LIVER-resent	chr1	191438709	191438709	G	C	Ppp2r5a-Dtl	n.191438709G>C	intergenic_region	MODIFIER	intergenic_region	76	1	0.013	124	65	0.52	SNP	5.91557
S3600-THY_vs_S3600-LIVER-resent	chr1	191491146	191491146	G	C	Ppp2r5a-Dtl	n.191491146G>C	intergenic_region	MODIFIER	intergenic_region	75	0	0	116	57	0.491	SNP	6.13317
S3600-THY_vs_S3600-LIVER-resent	chr1	191499053	191499053	G	C	Ppp2r5a-Dtl	n.191499053G>C	intergenic_region	MODIFIER	intergenic_region	59	0	0	124	53	0.431	SNP	6.29048
S3600-THY_vs_S3600-LIVER-resent	chr1	191503426	191503426	G	C	Ppp2r5a-Dtl	n.191503426G>C	intergenic_region	MODIFIER	intergenic_region	69	1	0.014	106	50	0.472	SNP	5.97972
S3600-THY_vs_S3600-LIVER-resent	chr1	191506019	191506019	G	C	Ppp2r5a-Dtl	n.191506019G>C	intergenic_region	MODIFIER	intergenic_region	65	0	0	94	35	0.37	SNP	5.90101
S3600-THY_vs_S3600-LIVER-resent	chr1	191533709	191533709	G	T	Dtl	c.*5534C>A	downstream_gene_variant	MODIFIER	transcript	83	1	0.012	122	70	0.571	SNP	5.82394
S3600-THY_vs_S3600-LIVER-resent	chr1	193458140	193458140	G	C	Camk1g-Mir205	n.193458140G>C	intergenic_region	MODIFIER	intergenic_region	69	1	0.014	126	69	0.544	SNP	6.07916
S3600-THY_vs_S3600-LIVER-resent	chr1	193751950	193751950	C	G	Mir205-4930503O07Rik	n.193751950C>G	intergenic_region	MODIFIER	intergenic_region	55	0	0	103	51	0.5	SNP	6.11818
S3600-THY_vs_S3600-LIVER-resent	chr1	193969370	193969370	C	G	Mir205-4930503O07Rik	n.193969370C>G	intergenic_region	MODIFIER	intergenic_region	53	0	0	104	48	0.462	SNP	6.00702
S3600-THY_vs_S3600-LIVER-resent	chr1	193994186	193994186	C	G	Mir205-4930503O07Rik	n.193994186C>G	intergenic_region	MODIFIER	intergenic_region	77	0	0	104	42	0.402	SNP	6.14278
S3600-THY_vs_S3600-LIVER-resent	chr1	194027162	194027162	C	G	Mir205-4930503O07Rik	n.194027162C>G	intergenic_region	MODIFIER	intergenic_region	68	0	0	88	43	0.494	SNP	6.30019
S3600-THY_vs_S3600-LIVER-resent	chr1	194176586	194176586	C	G	Mir205-4930503O07Rik	n.194176586C>G	intergenic_region	MODIFIER	intergenic_region	73	1	0.014	114	52	0.455	SNP	6.11114
S3600-THY_vs_S3600-LIVER-resent	chr1	194281491	194281491	C	G	4930503O07Rik-Plxna2	n.194281491C>G	intergenic_region	MODIFIER	intergenic_region	62	0	0	102	52	0.51	SNP	5.7562
S3600-THY_vs_S3600-LIVER-resent	chr1	194792676	194792676	C	G	Plxna2	c.3256-1053C>G	intron_variant	MODIFIER	transcript	74	0	0	114	26	0.234	SNP	5.95386
S3600-THY_vs_S3600-LIVER-resent	chr1	194989211	194989211	C	G	Gm16897-A330023F24Rik	n.194989211C>G	intergenic_region	MODIFIER	intergenic_region	69	0	0	110	53	0.472	SNP	6.21906
S3600-THY_vs_S3600-LIVER-resent	chr1	195196477	195196477	C	G	Cr2-CHR_END	n.195196477C>G	intergenic_region	MODIFIER	intergenic_region	77	0	0	101	48	0.475	SNP	6.42542
S3600-THY_vs_S3600-LIVER-resent	chr1	195196596	195196596	C	G	Cr2-CHR_END	n.195196596C>G	intergenic_region	MODIFIER	intergenic_region	65	0	0	114	60	0.522	SNP	5.95276
S3600-THY_vs_S3600-LIVER-resent	chr1	195208725	195208726	GT	G	Cr2-CHR_END	n.195208726delT	intergenic_region	MODIFIER	intergenic_region	54	0	0	74	32	0.432	DELETION.NumRepetitions_9.EventLength_1.RepeatExpansion_T	6.13235
S3600-THY_vs_S3600-LIVER-resent	chr2	3146502	3146502	G	C	Fam171a1	c.97+27850G>C	intron_variant	MODIFIER	transcript	81	0	0	104	48	0.462	SNP	5.87132
S3600-THY_vs_S3600-LIVER-resent	chr2	3183103	3183103	G	C	Fam171a1	c.326-3320G>C	intron_variant	MODIFIER	transcript	73	0	0	97	46	0.474	SNP	5.86824
S3600-THY_vs_S3600-LIVER-resent	chr2	3246605	3246605	G	C	Fam171a1-Nmt2	n.3246605G>C	intergenic_region	MODIFIER	intergenic_region	64	0	0	109	53	0.486	SNP	6.44056
S3600-THY_vs_S3600-LIVER-resent	chr2	4180805	4180805	G	C	Frmd4a	c.33+27695G>C	intron_variant	MODIFIER	transcript	75	1	0.013	113	56	0.491	SNP	5.78612
S3600-THY_vs_S3600-LIVER-resent	chr2	4263009	4263009	G	A	Frmd4a	c.33+109899G>A	intron_variant	MODIFIER	transcript	38	0	0	82	35	0.42	SNP	6.15521
S3600-THY_vs_S3600-LIVER-resent	chr2	4281386	4281386	G	T	Frmd4a	c.33+128276G>T	intron_variant	MODIFIER	transcript	70	0	0	116	53	0.455	SNP	5.79892
S3600-THY_vs_S3600-LIVER-resent	chr2	4462751	4462751	G	A	Frmd4a	c.100-10370G>A	intron_variant	MODIFIER	transcript	60	0	0	97	49	0.489	SNP	6.0368
S3600-THY_vs_S3600-LIVER-resent	chr2	4471470	4471470	G	C	Frmd4a	c.100-1651G>C	intron_variant	MODIFIER	transcript	70	0	0	100	53	0.53	SNP	6.21459
S3600-THY_vs_S3600-LIVER-resent	chr2	4501461	4501461	G	A	Frmd4a	c.372+3388G>A	intron_variant	MODIFIER	transcript	84	0	0	115	63	0.549	SNP	5.92511
S3600-THY_vs_S3600-LIVER-resent	chr2	4775744	4775744	G	C	Bend7	c.1069+12441G>C	intron_variant	MODIFIER	transcript	82	0	0	113	55	0.491	SNP	6.11076
S3600-THY_vs_S3600-LIVER-resent	chr2	4797373	4797373	G	A	Bend7	c.1243+790G>A	intron_variant	MODIFIER	transcript	70	0	0	119	65	0.546	SNP	5.88861
S3600-THY_vs_S3600-LIVER-resent	chr2	4847300	4847300	G	T	Bend7-Sephs1	n.4847300G>T	intergenic_region	MODIFIER	intergenic_region	45	0	0	69	36	0.522	SNP	6.56258
S3600-THY_vs_S3600-LIVER-resent	chr2	5114055	5114055	G	C	Optn-Ccdc3	n.5114055G>C	intergenic_region	MODIFIER	intergenic_region	72	0	0	75	40	0.527	SNP	6.15379
S3600-THY_vs_S3600-LIVER-resent	chr2	5135786	5135786	G	C	Ccdc3	c.-2148G>C	upstream_gene_variant	MODIFIER	transcript	87	1	0.011	96	49	0.51	SNP	6.0727
S3600-THY_vs_S3600-LIVER-resent	chr2	5159737	5159737	C	G	Ccdc3	c.549+18332C>G	intron_variant	MODIFIER	transcript	55	0	0	84	18	0.205	SNP	4.24293
S3600-THY_vs_S3600-LIVER-resent	chr2	5190778	5190778	G	C	Ccdc3	c.550-38138G>C	intron_variant	MODIFIER	transcript	66	0	0	98	41	0.423	SNP	5.9906
S3600-THY_vs_S3600-LIVER-resent	chr2	5212087	5212087	C	CTCTA	Ccdc3	c.550-16829_550-16828insTCTA	intron_variant	MODIFIER	transcript	47	0	0	80	21	0.263	INSERTION.NumRepetitions_10orMore.EventLength_4	4.54004
S3600-THY_vs_S3600-LIVER-resent	chr2	5262153	5262153	G	C	Ccdc3-Camk1d	n.5262153G>C	intergenic_region	MODIFIER	intergenic_region	46	0	0	87	44	0.506	SNP	5.77171
S3600-THY_vs_S3600-LIVER-resent	chr2	5349112	5349112	G	C	Camk1d	c.565+5557C>G	intron_variant	MODIFIER	transcript	61	0	0	98	58	0.589	SNP	5.87917
S3600-THY_vs_S3600-LIVER-resent	chr2	5424034	5424034	G	C	Camk1d	c.299+21036C>G	intron_variant	MODIFIER	transcript	93	0	0	106	47	0.452	SNP	6.20703
S3600-THY_vs_S3600-LIVER-resent	chr2	5429872	5429872	G	C	Camk1d	c.299+15198C>G	intron_variant	MODIFIER	transcript	77	0	0	108	53	0.486	SNP	5.93143
S3600-THY_vs_S3600-LIVER-resent	chr2	5811742	5811742	G	A	Cdc123	c.441-898C>T	intron_variant	MODIFIER	transcript	84	0	0	107	55	0.509	SNP	6.08296
S3600-THY_vs_S3600-LIVER-resent	chr2	7008189	7008189	T	A	Celf2	n.7008189A>T	intragenic_variant	MODIFIER	gene_variant	68	0	0	134	63	0.466	SNP	6.06923
S3600-THY_vs_S3600-LIVER-resent	chr2	7134414	7134414	C	G	Celf2	n.7134414G>C	intragenic_variant	MODIFIER	gene_variant	56	0	0	75	28	0.373	SNP	6.23637
S3600-THY_vs_S3600-LIVER-resent	chr2	7353626	7353627	TA	T	Celf2	n.7353627delT	intragenic_variant	MODIFIER	gene_variant	73	0	0	115	55	0.478	DELETION.NumRepetitions_10orMore.EventLength_1.RepeatExpansion_A	5.91858
S3600-THY_vs_S3600-LIVER-resent	chr2	7479301	7479301	G	C	Celf2-1700061F12Rik	n.7479301G>C	intergenic_region	MODIFIER	intergenic_region	55	0	0	133	60	0.458	SNP	6.06047
S3600-THY_vs_S3600-LIVER-resent	chr2	7534631	7534631	G	C	Celf2-1700061F12Rik	n.7534631G>C	intergenic_region	MODIFIER	intergenic_region	74	1	0.014	119	47	0.395	SNP	6.00774
S3600-THY_vs_S3600-LIVER-resent	chr2	7601209	7601209	G	C	Celf2-1700061F12Rik	n.7601209G>C	intergenic_region	MODIFIER	intergenic_region	63	0	0	119	49	0.416	SNP	6.42759
S3600-THY_vs_S3600-LIVER-resent	chr2	7676057	7676057	T	C	Celf2-1700061F12Rik	n.7676057T>C	intergenic_region	MODIFIER	intergenic_region	38	1	0.026	53	17	0.321	SNP	3.44721
S3600-THY_vs_S3600-LIVER-resent	chr2	8083483	8083483	T	TGATA	Celf2-1700061F12Rik	n.8083483_8083484insGATA	intergenic_region	MODIFIER	intergenic_region	40	1	0.025	60	28	0.484	INSERTION.NumRepetitions_10orMore.EventLength_4	6.13623
S3600-THY_vs_S3600-LIVER-resent	chr2	8099805	8099805	G	C	Celf2-1700061F12Rik	n.8099805G>C	intergenic_region	MODIFIER	intergenic_region	65	1	0.016	98	54	0.546	SNP	5.80562
S3600-THY_vs_S3600-LIVER-resent	chr2	8457743	8457743	G	C	Celf2-1700061F12Rik	n.8457743G>C	intergenic_region	MODIFIER	intergenic_region	54	0	0	101	48	0.465	SNP	5.88781
S3600-THY_vs_S3600-LIVER-resent	chr2	8590831	8590831	G	C	Celf2-1700061F12Rik	n.8590831G>C	intergenic_region	MODIFIER	intergenic_region	45	0	0	95	40	0.419	SNP	6.29547
S3600-THY_vs_S3600-LIVER-resent	chr2	8668276	8668276	G	C	Celf2-1700061F12Rik	n.8668276G>C	intergenic_region	MODIFIER	intergenic_region	66	0	0	132	69	0.515	SNP	5.87806
S3600-THY_vs_S3600-LIVER-resent	chr2	8690306	8690306	G	C	Celf2-1700061F12Rik	n.8690306G>C	intergenic_region	MODIFIER	intergenic_region	60	0	0	116	57	0.496	SNP	5.87569
S3600-THY_vs_S3600-LIVER-resent	chr2	8694893	8694894	AC	A	Celf2-1700061F12Rik	n.8694894delC	intergenic_region	MODIFIER	intergenic_region	42	0	0	77	17	0.221	DELETION.NumRepetitions_10orMore.EventLength_1.RepeatExpansion_C	3.26894
S3600-THY_vs_S3600-LIVER-resent	chr2	8707821	8707821	G	T	Celf2-1700061F12Rik	n.8707821G>T	intergenic_region	MODIFIER	intergenic_region	63	0	0	106	55	0.519	SNP	5.85651
S3600-THY_vs_S3600-LIVER-resent	chr2	8785597	8785597	G	C	Celf2-1700061F12Rik	n.8785597G>C	intergenic_region	MODIFIER	intergenic_region	62	0	0	105	51	0.49	SNP	6.22579
S3600-THY_vs_S3600-LIVER-resent	chr2	8806739	8806739	G	A	Celf2-1700061F12Rik	n.8806739G>A	intergenic_region	MODIFIER	intergenic_region	72	1	0.014	125	69	0.554	SNP	5.95574
S3600-THY_vs_S3600-LIVER-resent	chr2	9331888	9331888	C	G	1700061F12Rik-Gata3	n.9331888C>G	intergenic_region	MODIFIER	intergenic_region	67	1	0.015	93	43	0.462	SNP	6.15657
S3600-THY_vs_S3600-LIVER-resent	chr2	9576855	9576855	G	C	1700061F12Rik-Gata3	n.9576855G>C	intergenic_region	MODIFIER	intergenic_region	63	0	0	109	51	0.468	SNP	5.78762
S3600-THY_vs_S3600-LIVER-resent	chr2	9651349	9651349	C	G	1700061F12Rik-Gata3	n.9651349C>G	intergenic_region	MODIFIER	intergenic_region	61	0	0	127	49	0.389	SNP	5.71142
S3600-THY_vs_S3600-LIVER-resent	chr2	9721943	9721943	G	C	1700061F12Rik-Gata3	n.9721943G>C	intergenic_region	MODIFIER	intergenic_region	56	0	0	121	44	0.364	SNP	6.35917
S3600-THY_vs_S3600-LIVER-resent	chr2	9880496	9880496	C	T	Gata3	c.-2907G>A	upstream_gene_variant	MODIFIER	transcript	70	0	0	103	55	0.534	SNP	5.69163
S3600-THY_vs_S3600-LIVER-resent	chr2	10513265	10513265	T	C	Mir669o	n.-1035T>C	upstream_gene_variant	MODIFIER	transcript	39	0	0	61	25	0.41	SNP	6.2969
S3600-THY_vs_S3600-LIVER-resent	chr2	10584164	10584164	G	A	Sfmbt2	c.2787+3492G>A	intron_variant	MODIFIER	transcript	68	0	0	106	49	0.467	SNP	6.17175
S3600-THY_vs_S3600-LIVER-resent	chr2	10634137	10634137	G	C	Sfmbt2-Prkcq	n.10634137G>C	intergenic_region	MODIFIER	intergenic_region	50	0	0	109	54	0.5	SNP	5.84169
S3600-THY_vs_S3600-LIVER-resent	chr2	10650678	10650678	G	C	Sfmbt2-Prkcq	n.10650678G>C	intergenic_region	MODIFIER	intergenic_region	62	0	0	111	57	0.509	SNP	5.80693
S3600-THY_vs_S3600-LIVER-resent	chr2	10913580	10913580	G	C	Sfmbt2-Prkcq	n.10913580G>C	intergenic_region	MODIFIER	intergenic_region	54	0	0	120	67	0.558	SNP	6.22884
S3600-THY_vs_S3600-LIVER-resent	chr2	12205756	12205756	G	C	Itga8	c.1397-980C>G	intron_variant	MODIFIER	transcript	65	1	0.016	111	55	0.495	SNP	6.19102
S3600-THY_vs_S3600-LIVER-resent	chr2	12242069	12242069	G	C	Itga8	c.998+342C>G	intron_variant	MODIFIER	transcript	70	0	0	144	76	0.535	SNP	5.78256
S3600-THY_vs_S3600-LIVER-resent	chr2	12475995	12475995	G	C	Fam188a-Pter	n.12475995G>C	intergenic_region	MODIFIER	intergenic_region	73	0	0	106	58	0.547	SNP	5.79633
S3600-THY_vs_S3600-LIVER-resent	chr2	12598141	12598141	G	C	Fam188a-Pter	n.12598141G>C	intergenic_region	MODIFIER	intergenic_region	46	0	0	99	49	0.49	SNP	5.94288
S3600-THY_vs_S3600-LIVER-resent	chr2	12693119	12693119	G	C	Fam188a-Pter	n.12693119G>C	intergenic_region	MODIFIER	intergenic_region	62	0	0	101	42	0.416	SNP	6.15921
S3600-THY_vs_S3600-LIVER-resent	chr2	12926859	12926859	G	C	Pter	c.-76+2661G>C	intron_variant	MODIFIER	transcript	49	1	0.02	104	52	0.5	SNP	5.94393
S3600-THY_vs_S3600-LIVER-resent	chr2	14199112	14199112	A	T	Tmem236	c.466+3021A>T	intron_variant	MODIFIER	transcript	77	0	0	130	75	0.57	SNP	5.8772
S3600-THY_vs_S3600-LIVER-resent	chr2	14348282	14348282	G	C	Mrc1-Slc39a12	n.14348282G>C	intergenic_region	MODIFIER	intergenic_region	74	0	0	103	45	0.437	SNP	5.91826
S3600-THY_vs_S3600-LIVER-resent	chr2	14350621	14350621	G	C	Mrc1-Slc39a12	n.14350621G>C	intergenic_region	MODIFIER	intergenic_region	71	0	0	119	57	0.479	SNP	5.84744
S3600-THY_vs_S3600-LIVER-resent	chr2	14727315	14727315	G	C	Gm13315	n.*4693G>C	downstream_gene_variant	MODIFIER	transcript	49	0	0	80	29	0.372	SNP	6.39326
S3600-THY_vs_S3600-LIVER-resent	chr2	14824168	14824168	G	C	Cacnb2	c.202-50602G>C	intron_variant	MODIFIER	transcript	63	0	0	102	54	0.529	SNP	5.87473
S3600-THY_vs_S3600-LIVER-resent	chr2	14828386	14828386	C	CA	Cacnb2	c.202-46384_202-46383insA	intron_variant	MODIFIER	transcript	60	0	0	75	18	0.243	INSERTION.NumRepetitions_8.EventLength_1.RepeatExpansion_A	4.92578
S3600-THY_vs_S3600-LIVER-resent	chr2	14945798	14945798	G	A	Cacnb2	c.322-12968G>A	intron_variant	MODIFIER	transcript	44	0	0	117	62	0.518	SNP	5.93077
S3600-THY_vs_S3600-LIVER-resent	chr2	15048227	15048227	C	CT	Nsun6	c.75+694_75+695insA	intron_variant	MODIFIER	transcript	53	1	0.019	87	42	0.464	INSERTION.NumRepetitions_9.EventLength_1.RepeatExpansion_T	6.37352
S3600-THY_vs_S3600-LIVER-resent	chr2	15114104	15114104	G	A	Arl5b-Malrd1	n.15114104G>A	intergenic_region	MODIFIER	intergenic_region	63	1	0.016	116	64	0.552	SNP	5.80153
S3600-THY_vs_S3600-LIVER-resent	chr2	15149594	15149594	G	C	Arl5b-Malrd1	n.15149594G>C	intergenic_region	MODIFIER	intergenic_region	76	0	0	102	45	0.44	SNP	6.31105
S3600-THY_vs_S3600-LIVER-resent	chr2	15242155	15242155	G	C	Arl5b-Malrd1	n.15242155G>C	intergenic_region	MODIFIER	intergenic_region	64	0	0	86	43	0.494	SNP	5.96509
S3600-THY_vs_S3600-LIVER-resent	chr2	15315426	15315426	G	T	Arl5b-Malrd1	n.15315426G>T	intergenic_region	MODIFIER	intergenic_region	51	0	0	97	43	0.443	SNP	5.98129
S3600-THY_vs_S3600-LIVER-resent	chr2	15400893	15400893	G	C	Arl5b-Malrd1	n.15400893G>C	intergenic_region	MODIFIER	intergenic_region	55	0	0	92	49	0.527	SNP	5.81963
S3600-THY_vs_S3600-LIVER-resent	chr2	15682868	15682868	C	CATCT	Malrd1	c.1850-12325_1850-12324insATCT	intron_variant	MODIFIER	transcript	48	1	0.021	79	36	0.462	INSERTION.NumRepetitions_10orMore.EventLength_4	6.29548
S3600-THY_vs_S3600-LIVER-resent	chr2	15733771	15733771	G	C	Malrd1	c.2890-19035G>C	intron_variant	MODIFIER	transcript	60	1	0.017	101	51	0.5	SNP	6.20728
S3600-THY_vs_S3600-LIVER-resent	chr2	16162102	16162102	G	C	Malrd1	c.6035+11286G>C	intron_variant	MODIFIER	transcript	51	1	0.02	87	35	0.402	SNP	6.1879
S3600-THY_vs_S3600-LIVER-resent	chr2	16211809	16211809	G	C	Malrd1	c.6036-6029G>C	intron_variant	MODIFIER	transcript	65	0	0	121	54	0.437	SNP	5.93231
S3600-THY_vs_S3600-LIVER-resent	chr2	16242454	16242454	G	C	Malrd1	c.6213-9220G>C	intron_variant	MODIFIER	transcript	53	0	0	106	47	0.438	SNP	6.07153
S3600-THY_vs_S3600-LIVER-resent	chr2	16317944	16317944	T	A	Malrd1-Plxdc2	n.16317944T>A	intergenic_region	MODIFIER	intergenic_region	59	0	0	118	53	0.453	SNP	5.84178
S3600-THY_vs_S3600-LIVER-resent	chr2	16318167	16318168	TC	T	Malrd1-Plxdc2	n.16318168delC	intergenic_region	MODIFIER	intergenic_region	50	1	0.02	87	47	0.535	DELETION.NumRepetitions_2.EventLength_1.RepeatExpansion_C	6.07143
S3600-THY_vs_S3600-LIVER-resent	chr2	16419131	16419131	G	C	Plxdc2	c.112+61894G>C	intron_variant	MODIFIER	transcript	56	0	0	108	50	0.472	SNP	5.75365
S3600-THY_vs_S3600-LIVER-resent	chr2	16786613	16786613	G	A	Plxdc2-4930515L03Rik	n.16786613G>A	intergenic_region	MODIFIER	intergenic_region	55	1	0.018	102	42	0.412	SNP	6.36023
S3600-THY_vs_S3600-LIVER-resent	chr2	16878406	16878406	G	C	Plxdc2-4930515L03Rik	n.16878406G>C	intergenic_region	MODIFIER	intergenic_region	66	0	0	110	52	0.468	SNP	5.91137
S3600-THY_vs_S3600-LIVER-resent	chr2	16888729	16888729	G	C	Plxdc2-4930515L03Rik	n.16888729G>C	intergenic_region	MODIFIER	intergenic_region	59	0	0	88	43	0.489	SNP	6.13072
S3600-THY_vs_S3600-LIVER-resent	chr2	16911575	16911575	G	C	Plxdc2-4930515L03Rik	n.16911575G>C	intergenic_region	MODIFIER	intergenic_region	47	0	0	72	42	0.583	SNP	6.34408
S3600-THY_vs_S3600-LIVER-resent	chr2	16976810	16976810	G	C	4930515L03Rik	n.156+21178C>G	intron_variant	MODIFIER	transcript	65	0	0	99	57	0.576	SNP	6.14035
S3600-THY_vs_S3600-LIVER-resent	chr2	16994506	16994506	G	C	4930515L03Rik	n.156+3482C>G	intron_variant	MODIFIER	transcript	60	0	0	81	46	0.57	SNP	5.81968
S3600-THY_vs_S3600-LIVER-resent	chr2	17098943	17098943	G	A	4930515L03Rik-Nebl	n.17098943G>A	intergenic_region	MODIFIER	intergenic_region	61	0	0	116	54	0.466	SNP	5.6948
S3600-THY_vs_S3600-LIVER-resent	chr2	17653847	17653847	G	C	Nebl	c.165-63670C>G	intron_variant	MODIFIER	transcript	81	0	0	99	41	0.414	SNP	6.12544
S3600-THY_vs_S3600-LIVER-resent	chr2	17775501	17775501	G	C	Nebl-H2afb1	n.17775501G>C	intergenic_region	MODIFIER	intergenic_region	32	0	0	60	26	0.433	SNP	5.83984
S3600-THY_vs_S3600-LIVER-resent	chr2	17805710	17805710	G	A	Nebl-H2afb1	n.17805710G>A	intergenic_region	MODIFIER	intergenic_region	77	0	0	114	60	0.527	SNP	5.927
S3600-THY_vs_S3600-LIVER-resent	chr2	17898616	17898616	A	AAGAT	Nebl-H2afb1	n.17898616_17898617insAGAT	intergenic_region	MODIFIER	intergenic_region	43	1	0.024	73	37	0.521	INSERTION.NumRepetitions_10orMore.EventLength_4	6.4856
S3600-THY_vs_S3600-LIVER-resent	chr2	18100434	18100434	G	C	Mllt10	c.241-1024G>C	intron_variant	MODIFIER	transcript	71	0	0	131	63	0.477	SNP	5.95885
S3600-THY_vs_S3600-LIVER-resent	chr2	18285196	18285196	G	C	Dnajc1	c.809-410C>G	intron_variant	MODIFIER	transcript	70	1	0.014	109	44	0.396	SNP	6.05158
S3600-THY_vs_S3600-LIVER-resent	chr2	18703199	18703199	C	G	Spag6	c.121+3936C>G	intron_variant	MODIFIER	transcript	98	0	0	142	61	0.43	SNP	6.05149
S3600-THY_vs_S3600-LIVER-resent	chr2	18736025	18736025	G	GGGAAA	Spag6	c.1006-1178_1006-1177insGGAAA	intron_variant	MODIFIER	transcript	9	0	0	30	6	0.2	INSERTION.NumRepetitions_9.EventLength_5	0.516404
S3600-THY_vs_S3600-LIVER-resent	chr2	18767716	18767716	G	GAAAGA	Gm3363-Carlr	n.18767716_18767717insAAAGA	intergenic_region	MODIFIER	intergenic_region	18	0	0	24	24	1	INSERTION.NumRepetitions_7.EventLength_5	6.30003
S3600-THY_vs_S3600-LIVER-resent	chr2	19079826	19079826	G	C	4930426L09Rik-Armc3	n.19079826G>C	intergenic_region	MODIFIER	intergenic_region	77	0	0	95	52	0.547	SNP	5.73035
S3600-THY_vs_S3600-LIVER-resent	chr2	19172496	19172496	G	C	4930426L09Rik-Armc3	n.19172496G>C	intergenic_region	MODIFIER	intergenic_region	74	0	0	119	56	0.462	SNP	5.86137
S3600-THY_vs_S3600-LIVER-resent	chr2	19643294	19643294	G	T	4921504E06Rik-Gm3230	n.19643294G>T	intergenic_region	MODIFIER	intergenic_region	66	0	0	99	53	0.535	SNP	5.95192
S3600-THY_vs_S3600-LIVER-resent	chr2	19692590	19692590	G	C	Otud1-Etl4	n.19692590G>C	intergenic_region	MODIFIER	intergenic_region	77	0	0	114	46	0.402	SNP	5.77261
S3600-THY_vs_S3600-LIVER-resent	chr2	19713609	19713609	G	A	Otud1-Etl4	n.19713609G>A	intergenic_region	MODIFIER	intergenic_region	76	1	0.013	104	32	0.317	SNP	6.00298
S3600-THY_vs_S3600-LIVER-resent	chr2	19751256	19751256	G	C	Otud1-Etl4	n.19751256G>C	intergenic_region	MODIFIER	intergenic_region	80	0	0	107	47	0.439	SNP	6.01275
S3600-THY_vs_S3600-LIVER-resent	chr2	19775483	19775483	G	C	Otud1-Etl4	n.19775483G>C	intergenic_region	MODIFIER	intergenic_region	21	0	0	40	23	0.575	SNP	5.52295
S3600-THY_vs_S3600-LIVER-resent	chr2	19953959	19953959	G	C	Otud1-Etl4	n.19953959G>C	intergenic_region	MODIFIER	intergenic_region	79	0	0	90	20	0.222	SNP	5.53898
S3600-THY_vs_S3600-LIVER-resent	chr2	20224776	20224776	G	C	Otud1-Etl4	n.20224776G>C	intergenic_region	MODIFIER	intergenic_region	47	0	0	96	49	0.51	SNP	6.31789
S3600-THY_vs_S3600-LIVER-resent	chr2	20445221	20445221	C	G	Etl4	c.224-84738C>G	intron_variant	MODIFIER	transcript	56	0	0	101	47	0.455	SNP	5.88312
S3600-THY_vs_S3600-LIVER-resent	chr2	20497124	20497124	G	C	Etl4	c.224-32835G>C	intron_variant	MODIFIER	transcript	56	0	0	93	47	0.505	SNP	6.37521
S3600-THY_vs_S3600-LIVER-resent	chr2	20598028	20598028	G	C	Etl4	c.508-63870G>C	intron_variant	MODIFIER	transcript	57	1	0.018	99	59	0.596	SNP	5.90318
S3600-THY_vs_S3600-LIVER-resent	chr2	20690772	20690772	G	C	Etl4	c.707-18633G>C	intron_variant	MODIFIER	transcript	59	0	0	79	41	0.519	SNP	5.83701
S3600-THY_vs_S3600-LIVER-resent	chr2	20705286	20705286	G	C	Etl4	c.707-4119G>C	intron_variant	MODIFIER	transcript	58	1	0.017	109	55	0.5	SNP	6.02171
S3600-THY_vs_S3600-LIVER-resent	chr2	20765464	20765464	C	G	Etl4	c.1988-981C>G	intron_variant	MODIFIER	transcript	73	0	0	110	56	0.509	SNP	5.82762
S3600-THY_vs_S3600-LIVER-resent	chr2	20793717	20793717	G	A	Etl4	c.3251-4160G>A	intron_variant	MODIFIER	transcript	84	0	0	101	44	0.434	SNP	5.81356
S3600-THY_vs_S3600-LIVER-resent	chr2	20818491	20818491	G	C	Etl4-Arhgap21	n.20818491G>C	intergenic_region	MODIFIER	intergenic_region	76	0	0	103	53	0.515	SNP	5.99654
S3600-THY_vs_S3600-LIVER-resent	chr2	20871430	20871430	G	C	Arhgap21	c.2658C>G	stop_gained	HIGH	transcript	76	0	0	108	56	0.519	SNP	6.20864
S3600-THY_vs_S3600-LIVER-resent	chr2	20893759	20893759	C	G	Arhgap21	c.287-1582G>C	intron_variant	MODIFIER	transcript	69	0	0	99	53	0.535	SNP	6.25574
S3600-THY_vs_S3600-LIVER-resent	chr2	21148479	21148479	G	C	Gm13375-Enkur	n.21148479G>C	intergenic_region	MODIFIER	intergenic_region	85	0	0	104	57	0.548	SNP	5.90702
S3600-THY_vs_S3600-LIVER-resent	chr2	21282441	21282441	G	T	Thnsl1-Gpr158	n.21282441G>T	intergenic_region	MODIFIER	intergenic_region	34	0	0	64	23	0.349	SNP	4.9504
S3600-THY_vs_S3600-LIVER-resent	chr2	21286510	21286510	G	C	Thnsl1-Gpr158	n.21286510G>C	intergenic_region	MODIFIER	intergenic_region	55	0	0	96	60	0.632	SNP	5.70071
S3600-THY_vs_S3600-LIVER-resent	chr2	21322943	21322943	C	G	Thnsl1-Gpr158	n.21322943C>G	intergenic_region	MODIFIER	intergenic_region	59	0	0	90	40	0.455	SNP	5.93844
S3600-THY_vs_S3600-LIVER-resent	chr2	21340731	21340731	G	C	Thnsl1-Gpr158	n.21340731G>C	intergenic_region	MODIFIER	intergenic_region	58	0	0	97	54	0.552	SNP	6.22779
S3600-THY_vs_S3600-LIVER-resent	chr2	21344369	21344369	G	A	Thnsl1-Gpr158	n.21344369G>A	intergenic_region	MODIFIER	intergenic_region	75	1	0.013	94	50	0.532	SNP	6.22811
S3600-THY_vs_S3600-LIVER-resent	chr2	21372223	21372223	G	C	Gpr158	c.902+3066G>C	intron_variant	MODIFIER	transcript	50	0	0	105	42	0.4	SNP	6.26787
S3600-THY_vs_S3600-LIVER-resent	chr2	21387917	21387917	G	C	Gpr158	c.903-11404G>C	intron_variant	MODIFIER	transcript	55	0	0	101	43	0.426	SNP	6.32187
S3600-THY_vs_S3600-LIVER-resent	chr2	21436133	21436133	G	C	Gpr158	c.1008+36707G>C	intron_variant	MODIFIER	transcript	42	0	0	74	33	0.446	SNP	6.08217
S3600-THY_vs_S3600-LIVER-resent	chr2	21808946	21808946	C	CAGAA	Gpr158	c.1754-1605_1754-1604insAGAA	intron_variant	MODIFIER	transcript	28	0	0	43	21	0.5	INSERTION.NumRepetitions_10orMore.EventLength_4	5.65175
S3600-THY_vs_S3600-LIVER-resent	chr2	22278304	22278304	G	GAAGA	Myo3a	c.533-4283_533-4282insAAGA	intron_variant	MODIFIER	transcript	19	0	0	26	11	0.464	INSERTION.NumRepetitions_10orMore.EventLength_4	2.99774
S3600-THY_vs_S3600-LIVER-resent	chr2	23372805	23372805	G	C	Nxph2	c.52-26884G>C	intron_variant	MODIFIER	transcript	52	0	0	108	50	0.458	SNP	5.91703
S3600-THY_vs_S3600-LIVER-resent	chr2	23819229	23819229	G	C	Spopl-Hnmt	n.23819229G>C	intergenic_region	MODIFIER	intergenic_region	55	0	0	105	49	0.467	SNP	5.8335
S3600-THY_vs_S3600-LIVER-resent	chr2	23822677	23822677	G	GGAAAA	Spopl-Hnmt	n.23822677_23822678insGAAAA	intergenic_region	MODIFIER	intergenic_region	30	0	0	64	27	0.431	INSERTION.NumRepetitions_8.EventLength_5	5.39282
S3600-THY_vs_S3600-LIVER-resent	chr2	24009386	24009386	C	G	Hnmt	c.433-284G>C	intron_variant	MODIFIER	transcript	74	0	0	122	51	0.418	SNP	5.82992
S3600-THY_vs_S3600-LIVER-resent	chr2	24219528	24219528	G	C	Il1f6	c.270+2853G>C	intron_variant	MODIFIER	transcript	57	0	0	98	43	0.432	SNP	6.21979
S3600-THY_vs_S3600-LIVER-resent	chr2	24350994	24350994	G	C	Il1rn	c.*1364G>C	3_prime_UTR_variant	MODIFIER	transcript	59	0	0	104	45	0.433	SNP	5.93595
S3600-THY_vs_S3600-LIVER-resent	chr2	25429667	25429667	G	C	Fut7	c.*3766G>C	downstream_gene_variant	MODIFIER	transcript	73	1	0.014	130	60	0.453	SNP	5.98748
S3600-THY_vs_S3600-LIVER-resent	chr2	25552884	25552884	C	G	Traf2-Edf1	n.25552884C>G	intergenic_region	MODIFIER	intergenic_region	86	0	0	116	60	0.518	SNP	6.03626
S3600-THY_vs_S3600-LIVER-resent	chr2	26041726	26041726	C	T	Ubac1-Nacc2	n.26041726C>T	intergenic_region	MODIFIER	intergenic_region	90	1	0.011	126	58	0.456	SNP	6.01216
S3600-THY_vs_S3600-LIVER-resent	chr2	26557499	26557499	G	C	Gm35978-Egfl7	n.26557499G>C	intergenic_region	MODIFIER	intergenic_region	77	0	0	125	59	0.48	SNP	5.90257
S3600-THY_vs_S3600-LIVER-resent	chr2	26915605	26915605	C	G	Surf1	c.252G>C	synonymous_variant	LOW	transcript	104	0	0	131	32	0.244	SNP	5.88064
S3600-THY_vs_S3600-LIVER-resent	chr2	27177319	27177319	C	G	Dbh	c.1215C>G	missense_variant	MODERATE	transcript	89	0	0	139	34	0.246	SNP	6.31503
S3600-THY_vs_S3600-LIVER-resent	chr2	27221306	27221306	C	G	Sardh	c.1672-525G>C	intron_variant	MODIFIER	transcript	12	0	0	33	7	0.212	SNP	0.786327
S3600-THY_vs_S3600-LIVER-resent	chr2	27330496	27330496	G	C	Vav2	c.380+6184C>G	intron_variant	MODIFIER	transcript	82	0	0	135	74	0.548	SNP	5.7648
S3600-THY_vs_S3600-LIVER-resent	chr2	27441407	27441407	G	C	Brd3	c.*7058C>G	downstream_gene_variant	MODIFIER	transcript	71	0	0	78	22	0.286	SNP	6.28687
S3600-THY_vs_S3600-LIVER-resent	chr2	27899713	27899713	G	C	Col5a1	c.109+12789G>C	intron_variant	MODIFIER	transcript	74	0	0	99	40	0.408	SNP	6.01645
S3600-THY_vs_S3600-LIVER-resent	chr2	27910460	27910460	G	C	Col5a1	c.110-11557G>C	intron_variant	MODIFIER	transcript	78	0	0	131	74	0.57	SNP	5.85795
S3600-THY_vs_S3600-LIVER-resent	chr2	27966009	27966009	G	C	Col5a1	c.1827+359G>C	intron_variant	MODIFIER	transcript	70	0	0	127	62	0.492	SNP	6.04657
S3600-THY_vs_S3600-LIVER-resent	chr2	28024660	28024660	G	C	Col5a1	c.4754G>C	missense_variant	MODERATE	transcript	71	0	0	127	63	0.5	SNP	6.33687
S3600-THY_vs_S3600-LIVER-resent	chr2	28037533	28037533	G	A	Col5a1	c.*517G>A	3_prime_UTR_variant	MODIFIER	transcript	68	0	0	132	71	0.534	SNP	5.72045
S3600-THY_vs_S3600-LIVER-resent	chr2	29587698	29587698	C	G	Med27-Rapgef1	n.29587698C>G	intergenic_region	MODIFIER	intergenic_region	83	0	0	117	42	0.36	SNP	6.04491
S3600-THY_vs_S3600-LIVER-resent	chr2	30524121	30524121	T	TTTTA	Ier5l-Cstad	n.30524121_30524122insTTTA	intergenic_region	MODIFIER	intergenic_region	43	1	0.023	54	25	0.463	INSERTION.NumRepetitions_10orMore.EventLength_4	5.81241
S3600-THY_vs_S3600-LIVER-resent	chr2	30579699	30579699	C	CTAT	Ier5l-Cstad	n.30579699_30579700insTAT	intergenic_region	MODIFIER	intergenic_region	35	0	0	48	19	0.396	INSERTION.NumRepetitions_10orMore.EventLength_3	5.18017
S3600-THY_vs_S3600-LIVER-resent	chr2	32053662	32053662	C	G	Nup214	c.*1510C>G	3_prime_UTR_variant	MODIFIER	transcript	74	0	0	107	29	0.271	SNP	6.15779
S3600-THY_vs_S3600-LIVER-resent	chr2	32271935	32271935	G	C	Uck1-Swi5	n.32271935G>C	intergenic_region	MODIFIER	intergenic_region	99	0	0	110	56	0.514	SNP	5.7595
S3600-THY_vs_S3600-LIVER-resent	chr2	32310581	32310581	G	C	Golga2	c.*3961G>C	downstream_gene_variant	MODIFIER	transcript	95	0	0	132	48	0.362	SNP	5.66517
S3600-THY_vs_S3600-LIVER-resent	chr2	32327153	32327153	C	G	Dnm1	c.1422+808G>C	intron_variant	MODIFIER	transcript	110	0	0	126	56	0.443	SNP	5.89759
S3600-THY_vs_S3600-LIVER-resent	chr2	32391769	32391769	C	CCTTT	Lcn2	c.-4053_-4052insAAAG	upstream_gene_variant	MODIFIER	transcript	25	1	0.04	36	17	0.472	INSERTION.NumRepetitions_10orMore.EventLength_4	3.72238
S3600-THY_vs_S3600-LIVER-resent	chr2	32496260	32496260	G	C	Naif1-Fam102a	n.32496260G>C	intergenic_region	MODIFIER	intergenic_region	88	1	0.012	125	56	0.439	SNP	6.19483
S3600-THY_vs_S3600-LIVER-resent	chr2	32501959	32501959	C	G	Naif1-Fam102a	n.32501959C>G	intergenic_region	MODIFIER	intergenic_region	67	0	0	113	60	0.531	SNP	5.81084
S3600-THY_vs_S3600-LIVER-resent	chr2	32770138	32770138	G	C	Ttc16	c.828C>G	synonymous_variant	LOW	transcript	99	0	0	108	50	0.463	SNP	5.8596
S3600-THY_vs_S3600-LIVER-resent	chr2	32815084	32815084	C	G	Stxbp1	c.430-57G>C	intron_variant	MODIFIER	transcript	87	0	0	122	63	0.512	SNP	6.21238
S3600-THY_vs_S3600-LIVER-resent	chr2	33210199	33210199	G	C	Ralgps1	c.611-35651C>G	intron_variant	MODIFIER	transcript	64	0	0	128	46	0.359	SNP	6.30513
S3600-THY_vs_S3600-LIVER-resent	chr2	33694131	33694131	G	C	C130021I20Rik-Mvb12b	n.33694131G>C	intergenic_region	MODIFIER	intergenic_region	79	0	0	129	61	0.473	SNP	5.8039
S3600-THY_vs_S3600-LIVER-resent	chr2	33760797	33760797	G	C	Mvb12b	c.752-5752C>G	intron_variant	MODIFIER	transcript	74	0	0	99	26	0.263	SNP	6.4456
S3600-THY_vs_S3600-LIVER-resent	chr2	33981597	33981597	G	T	Mvb12b-C230014O12Rik	n.33981597G>T	intergenic_region	MODIFIER	intergenic_region	70	0	0	98	36	0.367	SNP	6.03018
S3600-THY_vs_S3600-LIVER-resent	chr2	34084964	34084964	T	TGATA	C230014O12Rik	n.227+22544_227+22545insTATC	intron_variant	MODIFIER	transcript	33	0	0	65	24	0.397	INSERTION.NumRepetitions_10orMore.EventLength_4	4.97173
S3600-THY_vs_S3600-LIVER-resent	chr2	34592210	34592210	G	A	Mapkap1	c.1208-5213G>A	intron_variant	MODIFIER	transcript	105	0	0	130	30	0.233	SNP	6.20763
S3600-THY_vs_S3600-LIVER-resent	chr2	34754382	34754382	G	C	Gapvd1	c.-150C>G	5_prime_UTR_variant	MODIFIER	transcript	68	0	0	111	33	0.284	SNP	6.19848
S3600-THY_vs_S3600-LIVER-resent	chr2	34771810	34771810	G	C	Hspa5	c.-512G>C	upstream_gene_variant	MODIFIER	transcript	69	0	0	103	25	0.238	SNP	5.63008
S3600-THY_vs_S3600-LIVER-resent	chr2	34892744	34892744	G	C	Cutal	c.*2362G>C	downstream_gene_variant	MODIFIER	transcript	103	0	0	122	56	0.463	SNP	6.00083
S3600-THY_vs_S3600-LIVER-resent	chr2	35024497	35024497	A	AAAAT	Hc	c.2450-239_2450-238insATTT	intron_variant	MODIFIER	transcript	71	0	0	106	49	0.462	INSERTION.NumRepetitions_8.EventLength_4	5.66899
S3600-THY_vs_S3600-LIVER-resent	chr2	35229871	35229871	C	G	Rab14-Gsn	n.35229871C>G	intergenic_region	MODIFIER	intergenic_region	80	0	0	130	59	0.454	SNP	5.82344
S3600-THY_vs_S3600-LIVER-resent	chr2	35232435	35232435	C	G	Rab14-Gsn	n.35232435C>G	intergenic_region	MODIFIER	intergenic_region	61	0	0	113	58	0.513	SNP	5.82521
S3600-THY_vs_S3600-LIVER-resent	chr2	35311971	35311971	C	G	Gsn	c.*4305C>G	downstream_gene_variant	MODIFIER	transcript	89	0	0	100	36	0.367	SNP	5.83821
S3600-THY_vs_S3600-LIVER-resent	chr2	36310409	36310409	G	C	Ptgs1-Olfr338	n.36310409G>C	intergenic_region	MODIFIER	intergenic_region	46	1	0.022	113	60	0.536	SNP	6.24389
S3600-THY_vs_S3600-LIVER-resent	chr2	36467924	36467924	G	A	Olfr340-Olfr341	n.36467924G>A	intergenic_region	MODIFIER	intergenic_region	60	0	0	97	59	0.608	SNP	5.83742
S3600-THY_vs_S3600-LIVER-resent	chr2	37174987	37174987	G	C	Olfr362-Olfr365	n.37174987G>C	intergenic_region	MODIFIER	intergenic_region	50	0	0	95	47	0.495	SNP	6.23399
S3600-THY_vs_S3600-LIVER-resent	chr2	37214262	37214262	G	C	Olfr365-Olfr366	n.37214262G>C	intergenic_region	MODIFIER	intergenic_region	75	0	0	111	55	0.491	SNP	6.30745
S3600-THY_vs_S3600-LIVER-resent	chr2	37294172	37294172	A	G	Olfr367-ps-Olfr368	n.37294172A>G	intergenic_region	MODIFIER	intergenic_region	50	0	0	90	34	0.375	SNP	6.09759
S3600-THY_vs_S3600-LIVER-resent	chr2	37964365	37964365	G	A	Dennd1a	c.766-2623C>T	intron_variant	MODIFIER	transcript	54	1	0.019	88	54	0.614	SNP	5.99
S3600-THY_vs_S3600-LIVER-resent	chr2	38025788	38025788	G	C	Dennd1a	c.508-4322C>G	intron_variant	MODIFIER	transcript	56	1	0.018	103	53	0.515	SNP	6.32489
S3600-THY_vs_S3600-LIVER-resent	chr2	38031154	38031154	G	C	Dennd1a	c.507+7998C>G	intron_variant	MODIFIER	transcript	64	0	0	114	53	0.465	SNP	6.03467
S3600-THY_vs_S3600-LIVER-resent	chr2	38254715	38254715	A	AAGAAG	Dennd1a	c.18-11244_18-11243insCTTCT	intron_variant	MODIFIER	transcript	32	0	0	48	20	0.417	INSERTION.NumRepetitions_9.EventLength_5	5.11595
S3600-THY_vs_S3600-LIVER-resent	chr2	39221511	39221511	G	A	Ppp6c	c.75+4656C>T	intron_variant	MODIFIER	transcript	88	0	0	135	63	0.47	SNP	5.79524
S3600-THY_vs_S3600-LIVER-resent	chr2	39228252	39228252	G	C	Ppp6c	c.-2011C>G	upstream_gene_variant	MODIFIER	transcript	68	0	0	106	45	0.423	SNP	6.1061
S3600-THY_vs_S3600-LIVER-resent	chr2	39255926	39255926	G	C	Ppp6c-Lrp1b	n.39255926G>C	intergenic_region	MODIFIER	intergenic_region	57	0	0	116	59	0.509	SNP	5.91996
S3600-THY_vs_S3600-LIVER-resent	chr2	39265172	39265172	G	C	Ppp6c-Lrp1b	n.39265172G>C	intergenic_region	MODIFIER	intergenic_region	71	0	0	107	51	0.472	SNP	5.89859
S3600-THY_vs_S3600-LIVER-resent	chr2	40685303	40685303	G	GAGAA	Lrp1b	c.11893-6089_11893-6088insTTCT	intron_variant	MODIFIER	transcript	26	0	0	39	20	0.525	INSERTION.NumRepetitions_10orMore.EventLength_4	5.45824
S3600-THY_vs_S3600-LIVER-resent	chr2	41853209	41853210	TA	T	Lrp1b	c.344-64133delT	intron_variant	MODIFIER	transcript	54	0	0	94	20	0.215	DELETION.NumRepetitions_9.EventLength_1.RepeatExpansion_A	4.12103
S3600-THY_vs_S3600-LIVER-resent	chr2	42898085	42898093	TTAGATAGA	T	Lrp1b-Kynu	n.42898086_42898093delTAGATAGA	intergenic_region	MODIFIER	intergenic_region	39	13	0	68	62	0.667	DELETION.NumRepetitions_10orMore.EventLength_4	5.80558
S3600-THY_vs_S3600-LIVER-resent	chr2	43133109	43133109	G	C	Lrp1b-Kynu	n.43133109G>C	intergenic_region	MODIFIER	intergenic_region	67	0	0	127	56	0.437	SNP	6.14102
S3600-THY_vs_S3600-LIVER-resent	chr2	43200249	43200249	G	C	Lrp1b-Kynu	n.43200249G>C	intergenic_region	MODIFIER	intergenic_region	63	0	0	98	40	0.408	SNP	5.86516
S3600-THY_vs_S3600-LIVER-resent	chr2	43208055	43208055	G	A	Lrp1b-Kynu	n.43208055G>A	intergenic_region	MODIFIER	intergenic_region	76	1	0.013	111	49	0.454	SNP	5.84356
S3600-THY_vs_S3600-LIVER-resent	chr2	43264805	43264805	G	C	Lrp1b-Kynu	n.43264805G>C	intergenic_region	MODIFIER	intergenic_region	63	0	0	97	41	0.411	SNP	6.21148
S3600-THY_vs_S3600-LIVER-resent	chr2	43541880	43541880	T	C	Lrp1b-Kynu	n.43541880T>C	intergenic_region	MODIFIER	intergenic_region	19	1	0.053	44	21	0.477	SNP	2.93109
S3600-THY_vs_S3600-LIVER-resent	chr2	44121967	44121967	G	C	Arhgap15	c.844+5251G>C	intron_variant	MODIFIER	transcript	89	0	0	136	78	0.57	SNP	5.77979
S3600-THY_vs_S3600-LIVER-resent	chr2	44184611	44184611	G	A	Arhgap15	c.1021+8163G>A	intron_variant	MODIFIER	transcript	76	0	0	104	50	0.48	SNP	5.85135
S3600-THY_vs_S3600-LIVER-resent	chr2	44193646	44193646	G	C	Arhgap15	c.1021+17198G>C	intron_variant	MODIFIER	transcript	88	0	0	118	62	0.513	SNP	5.8502
S3600-THY_vs_S3600-LIVER-resent	chr2	44206200	44206200	G	A	Arhgap15	c.1021+29752G>A	intron_variant	MODIFIER	transcript	70	0	0	130	72	0.554	SNP	5.83614
S3600-THY_vs_S3600-LIVER-resent	chr2	44354004	44354004	G	C	Arhgap15	c.1262+31223G>C	intron_variant	MODIFIER	transcript	82	1	0.013	105	48	0.462	SNP	5.78406
S3600-THY_vs_S3600-LIVER-resent	chr2	44532300	44532300	G	A	Arhgap15-Gtdc1	n.44532300G>A	intergenic_region	MODIFIER	intergenic_region	84	0	0	108	58	0.537	SNP	5.89056
S3600-THY_vs_S3600-LIVER-resent	chr2	44538031	44538031	G	C	Arhgap15-Gtdc1	n.44538031G>C	intergenic_region	MODIFIER	intergenic_region	78	0	0	101	54	0.545	SNP	5.88417
S3600-THY_vs_S3600-LIVER-resent	chr2	44576010	44576010	G	C	Gtdc1	c.947-423C>G	intron_variant	MODIFIER	transcript	88	0	0	142	63	0.44	SNP	6.1798
S3600-THY_vs_S3600-LIVER-resent	chr2	44647548	44647548	G	A	Gtdc1	c.522-12232C>T	intron_variant	MODIFIER	transcript	70	0	0	132	55	0.42	SNP	5.7283
S3600-THY_vs_S3600-LIVER-resent	chr2	44689813	44689813	A	ATATT	Gtdc1	c.522-54498_522-54497insAATA	intron_variant	MODIFIER	transcript	53	1	0.019	64	35	0.556	INSERTION.NumRepetitions_10orMore.EventLength_4	6.21771
S3600-THY_vs_S3600-LIVER-resent	chr2	44754888	44754888	G	C	Gtdc1	c.347+1380C>G	intron_variant	MODIFIER	transcript	82	0	0	96	45	0.469	SNP	5.77467
S3600-THY_vs_S3600-LIVER-resent	chr2	44765368	44765368	G	C	Gtdc1	c.180-8933C>G	intron_variant	MODIFIER	transcript	67	0	0	92	46	0.5	SNP	5.94255
S3600-THY_vs_S3600-LIVER-resent	chr2	45257440	45257440	G	A	Zeb2os-1700019E08Rik	n.45257440G>A	intergenic_region	MODIFIER	intergenic_region	80	0	0	102	53	0.515	SNP	6.34602
S3600-THY_vs_S3600-LIVER-resent	chr2	45258578	45258578	G	C	Zeb2os-1700019E08Rik	n.45258578G>C	intergenic_region	MODIFIER	intergenic_region	97	0	0	122	63	0.517	SNP	5.66004
S3600-THY_vs_S3600-LIVER-resent	chr2	45265156	45265156	G	C	Zeb2os-1700019E08Rik	n.45265156G>C	intergenic_region	MODIFIER	intergenic_region	89	1	0.012	94	41	0.436	SNP	6.44955
S3600-THY_vs_S3600-LIVER-resent	chr2	45607807	45607807	G	C	Zeb2os-1700019E08Rik	n.45607807G>C	intergenic_region	MODIFIER	intergenic_region	69	0	0	97	54	0.557	SNP	5.78396
S3600-THY_vs_S3600-LIVER-resent	chr2	45643498	45643498	G	C	Zeb2os-1700019E08Rik	n.45643498G>C	intergenic_region	MODIFIER	intergenic_region	50	0	0	121	48	0.398	SNP	5.85787
S3600-THY_vs_S3600-LIVER-resent	chr2	45827091	45827091	G	C	1700019E08Rik-Acvr2a	n.45827091G>C	intergenic_region	MODIFIER	intergenic_region	54	0	0	111	40	0.355	SNP	6.385
S3600-THY_vs_S3600-LIVER-resent	chr2	45944006	45944006	G	C	1700019E08Rik-Acvr2a	n.45944006G>C	intergenic_region	MODIFIER	intergenic_region	54	0	0	81	42	0.506	SNP	5.97011
S3600-THY_vs_S3600-LIVER-resent	chr2	45951942	45951943	CG	C	1700019E08Rik-Acvr2a	n.45951943delG	intergenic_region	MODIFIER	intergenic_region	33	0	0	53	23	0.434	DELETION.NumRepetitions_5.EventLength_1.RepeatExpansion_G	5.73152
S3600-THY_vs_S3600-LIVER-resent	chr2	46027589	46027589	G	C	1700019E08Rik-Acvr2a	n.46027589G>C	intergenic_region	MODIFIER	intergenic_region	57	0	0	106	51	0.481	SNP	5.99186
S3600-THY_vs_S3600-LIVER-resent	chr2	46403114	46403114	G	C	1700019E08Rik-Acvr2a	n.46403114G>C	intergenic_region	MODIFIER	intergenic_region	42	0	0	75	31	0.413	SNP	6.325
S3600-THY_vs_S3600-LIVER-resent	chr2	46432661	46432661	G	GA	1700019E08Rik-Acvr2a	n.46432661_46432662insA	intergenic_region	MODIFIER	intergenic_region	76	0	0	103	33	0.32	INSERTION.NumRepetitions_6.EventLength_1.RepeatExpansion_A	6.01794
S3600-THY_vs_S3600-LIVER-resent	chr2	46553203	46553203	G	C	1700019E08Rik-Acvr2a	n.46553203G>C	intergenic_region	MODIFIER	intergenic_region	72	0	0	102	37	0.378	SNP	5.91338
S3600-THY_vs_S3600-LIVER-resent	chr2	46660805	46660805	G	T	1700019E08Rik-Acvr2a	n.46660805G>T	intergenic_region	MODIFIER	intergenic_region	69	0	0	121	47	0.387	SNP	6.3638
S3600-THY_vs_S3600-LIVER-resent	chr2	46823758	46823758	G	C	1700019E08Rik-Acvr2a	n.46823758G>C	intergenic_region	MODIFIER	intergenic_region	75	1	0.013	116	44	0.383	SNP	5.92293
S3600-THY_vs_S3600-LIVER-resent	chr2	47038580	47038580	A	AAAG	1700019E08Rik-Acvr2a	n.47038580_47038581insAAG	intergenic_region	MODIFIER	intergenic_region	27	0	0	41	14	0.372	INSERTION.NumRepetitions_10orMore.EventLength_3	3.38884
S3600-THY_vs_S3600-LIVER-resent	chr2	47358805	47358805	C	G	1700019E08Rik-Acvr2a	n.47358805C>G	intergenic_region	MODIFIER	intergenic_region	74	0	0	118	26	0.222	SNP	5.89777
S3600-THY_vs_S3600-LIVER-resent	chr2	47835837	47835837	G	C	1700019E08Rik-Acvr2a	n.47835837G>C	intergenic_region	MODIFIER	intergenic_region	51	0	0	105	48	0.456	SNP	6.11162
S3600-THY_vs_S3600-LIVER-resent	chr2	47909596	47909596	G	C	1700019E08Rik-Acvr2a	n.47909596G>C	intergenic_region	MODIFIER	intergenic_region	57	0	0	116	62	0.535	SNP	5.80693
S3600-THY_vs_S3600-LIVER-resent	chr2	48147658	48147658	G	C	1700019E08Rik-Acvr2a	n.48147658G>C	intergenic_region	MODIFIER	intergenic_region	63	0	0	124	64	0.52	SNP	5.86028
S3600-THY_vs_S3600-LIVER-resent	chr2	48193071	48193071	G	C	1700019E08Rik-Acvr2a	n.48193071G>C	intergenic_region	MODIFIER	intergenic_region	79	0	0	131	55	0.42	SNP	5.81414
S3600-THY_vs_S3600-LIVER-resent	chr2	48291189	48291189	G	T	1700019E08Rik-Acvr2a	n.48291189G>T	intergenic_region	MODIFIER	intergenic_region	55	0	0	97	53	0.546	SNP	6.44696
S3600-THY_vs_S3600-LIVER-resent	chr2	48372145	48372145	G	C	1700019E08Rik-Acvr2a	n.48372145G>C	intergenic_region	MODIFIER	intergenic_region	64	0	0	96	47	0.49	SNP	6.03145
S3600-THY_vs_S3600-LIVER-resent	chr2	48566568	48566568	G	T	1700019E08Rik-Acvr2a	n.48566568G>T	intergenic_region	MODIFIER	intergenic_region	78	1	0.013	110	59	0.546	SNP	5.83248
S3600-THY_vs_S3600-LIVER-resent	chr2	48772312	48772312	G	T	1700019E08Rik-Acvr2a	n.48772312G>T	intergenic_region	MODIFIER	intergenic_region	73	1	0.014	98	57	0.583	SNP	5.84143
S3600-THY_vs_S3600-LIVER-resent	chr2	48785386	48785386	G	C	1700019E08Rik-Acvr2a	n.48785386G>C	intergenic_region	MODIFIER	intergenic_region	62	0	0	111	58	0.523	SNP	6.18735
S3600-THY_vs_S3600-LIVER-resent	chr2	48804552	48804552	G	A	1700019E08Rik-Acvr2a	n.48804552G>A	intergenic_region	MODIFIER	intergenic_region	72	0	0	103	47	0.461	SNP	6.19689
S3600-THY_vs_S3600-LIVER-resent	chr2	48961670	48961670	G	T	Mbd5	c.-1217+12121G>T	intron_variant	MODIFIER	transcript	74	1	0.014	99	46	0.465	SNP	6.15784
S3600-THY_vs_S3600-LIVER-resent	chr2	49340805	49340805	G	C	Mbd5-Epc2	n.49340805G>C	intergenic_region	MODIFIER	intergenic_region	95	0	0	114	46	0.402	SNP	6.25711
S3600-THY_vs_S3600-LIVER-resent	chr2	50113347	50113347	G	A	Lypd6	c.-72+46763G>A	intron_variant	MODIFIER	transcript	61	0	0	94	40	0.426	SNP	5.90422
S3600-THY_vs_S3600-LIVER-resent	chr2	50192471	50192471	G	C	Lypd6	c.*1654G>C	3_prime_UTR_variant	MODIFIER	transcript	53	0	0	121	57	0.471	SNP	5.95101
S3600-THY_vs_S3600-LIVER-resent	chr2	50193223	50193223	G	C	Lypd6	c.*2406G>C	3_prime_UTR_variant	MODIFIER	transcript	55	0	0	113	52	0.464	SNP	5.69297
S3600-THY_vs_S3600-LIVER-resent	chr2	50251059	50251059	G	C	Lypd6-Mmadhc	n.50251059G>C	intergenic_region	MODIFIER	intergenic_region	57	1	0.018	93	34	0.366	SNP	6.10054
S3600-THY_vs_S3600-LIVER-resent	chr2	50255185	50255185	G	C	Lypd6-Mmadhc	n.50255185G>C	intergenic_region	MODIFIER	intergenic_region	78	0	0	117	62	0.53	SNP	6.14828
S3600-THY_vs_S3600-LIVER-resent	chr2	50257621	50257621	G	C	Lypd6-Mmadhc	n.50257621G>C	intergenic_region	MODIFIER	intergenic_region	44	0	0	104	57	0.544	SNP	6.10508
S3600-THY_vs_S3600-LIVER-resent	chr2	50343720	50343720	G	C	Gm13483	n.94-11305G>C	intron_variant	MODIFIER	transcript	78	1	0.013	108	43	0.398	SNP	5.9013
S3600-THY_vs_S3600-LIVER-resent	chr2	50346292	50346292	G	C	Gm13483	n.94-8733G>C	intron_variant	MODIFIER	transcript	61	0	0	89	42	0.488	SNP	6.15707
S3600-THY_vs_S3600-LIVER-resent	chr2	50371875	50371875	G	C	Gm13483	n.50371875G>C	intragenic_variant	MODIFIER	gene_variant	59	1	0.017	117	52	0.435	SNP	5.80964
S3600-THY_vs_S3600-LIVER-resent	chr2	50375746	50375746	G	C	Gm13483	n.50375746G>C	intragenic_variant	MODIFIER	gene_variant	59	0	0	116	64	0.548	SNP	6.05709
S3600-THY_vs_S3600-LIVER-resent	chr2	50473175	50473175	G	C	Gm13483-Gm13498	n.50473175G>C	intergenic_region	MODIFIER	intergenic_region	73	0	0	101	45	0.44	SNP	5.92957
S3600-THY_vs_S3600-LIVER-resent	chr2	50523038	50523038	G	C	Gm13483-Gm13498	n.50523038G>C	intergenic_region	MODIFIER	intergenic_region	69	0	0	122	57	0.462	SNP	5.98886
S3600-THY_vs_S3600-LIVER-resent	chr2	50527060	50527060	G	C	Gm13483-Gm13498	n.50527060G>C	intergenic_region	MODIFIER	intergenic_region	81	0	0	130	57	0.434	SNP	5.97674
S3600-THY_vs_S3600-LIVER-resent	chr2	50529812	50529813	CT	C	Gm13483-Gm13498	n.50529813delT	intergenic_region	MODIFIER	intergenic_region	42	1	0.024	74	40	0.534	DELETION.NumRepetitions_10orMore.EventLength_1.RepeatExpansion_T	6.17907
S3600-THY_vs_S3600-LIVER-resent	chr2	50873137	50873137	G	C	Gm13483-Gm13498	n.50873137G>C	intergenic_region	MODIFIER	intergenic_region	76	0	0	98	47	0.474	SNP	6.07465
S3600-THY_vs_S3600-LIVER-resent	chr2	51071898	51071898	G	C	Gm13498-Rnd3	n.51071898G>C	intergenic_region	MODIFIER	intergenic_region	56	0	0	101	47	0.465	SNP	5.88312
S3600-THY_vs_S3600-LIVER-resent	chr2	51080683	51080683	G	C	Gm13498-Rnd3	n.51080683G>C	intergenic_region	MODIFIER	intergenic_region	67	0	0	125	51	0.415	SNP	6.10167
S3600-THY_vs_S3600-LIVER-resent	chr2	51128610	51128610	G	C	Rnd3	c.*3684C>G	downstream_gene_variant	MODIFIER	transcript	69	0	0	117	55	0.474	SNP	6.08933
S3600-THY_vs_S3600-LIVER-resent	chr2	51201615	51201615	G	C	Rnd3-Gm13497	n.51201615G>C	intergenic_region	MODIFIER	intergenic_region	71	0	0	116	57	0.496	SNP	5.90921
S3600-THY_vs_S3600-LIVER-resent	chr2	51212555	51212555	G	A	Rnd3-Gm13497	n.51212555G>A	intergenic_region	MODIFIER	intergenic_region	79	0	0	121	56	0.458	SNP	6.1184
S3600-THY_vs_S3600-LIVER-resent	chr2	51234263	51234263	G	C	Rnd3-Gm13497	n.51234263G>C	intergenic_region	MODIFIER	intergenic_region	89	0	0	97	49	0.516	SNP	5.73878
S3600-THY_vs_S3600-LIVER-resent	chr2	51250903	51250903	G	C	Gm13497	n.389+8684G>C	intron_variant	MODIFIER	transcript	56	0	0	96	49	0.51	SNP	5.78408
S3600-THY_vs_S3600-LIVER-resent	chr2	51264254	51264254	G	A	Gm13497	n.389+22035G>A	intron_variant	MODIFIER	transcript	71	0	0	97	51	0.526	SNP	5.88114
S3600-THY_vs_S3600-LIVER-resent	chr2	51549189	51549189	G	C	1700057H21Rik-Tas2r134	n.51549189G>C	intergenic_region	MODIFIER	intergenic_region	56	1	0.018	104	49	0.471	SNP	6.1695
S3600-THY_vs_S3600-LIVER-resent	chr2	51675474	51675474	G	C	Gm13490	n.1192+660C>G	intron_variant	MODIFIER	transcript	64	0	0	92	49	0.533	SNP	6.31163
S3600-THY_vs_S3600-LIVER-resent	chr2	52067140	52067140	G	C	Tnfaip6-Rif1	n.52067140G>C	intergenic_region	MODIFIER	intergenic_region	74	0	0	109	50	0.459	SNP	5.90884
S3600-THY_vs_S3600-LIVER-resent	chr2	52557717	52557717	G	C	Cacnb4	c.145-79906C>G	intron_variant	MODIFIER	transcript	61	0	0	120	56	0.467	SNP	5.97343
S3600-THY_vs_S3600-LIVER-resent	chr2	52613439	52613439	G	GAGGGAA	Cacnb4	c.144+62288_144+62289insTTCCCT	intron_variant	MODIFIER	transcript	15	0	0	14	9	0.643	INSERTION.NumRepetitions_8.EventLength_6	3.69919
S3600-THY_vs_S3600-LIVER-resent	chr2	53282584	53282584	G	C	Arl6ip6-Rprm	n.53282584G>C	intergenic_region	MODIFIER	intergenic_region	40	0	0	76	39	0.513	SNP	6.08262
S3600-THY_vs_S3600-LIVER-resent	chr2	53319885	53319885	G	C	Arl6ip6-Rprm	n.53319885G>C	intergenic_region	MODIFIER	intergenic_region	45	0	0	95	46	0.489	SNP	6.12845
S3600-THY_vs_S3600-LIVER-resent	chr2	53382620	53382620	G	C	Arl6ip6-Rprm	n.53382620G>C	intergenic_region	MODIFIER	intergenic_region	79	0	0	121	67	0.555	SNP	5.82277
S3600-THY_vs_S3600-LIVER-resent	chr2	53464116	53464116	G	C	Arl6ip6-Rprm	n.53464116G>C	intergenic_region	MODIFIER	intergenic_region	59	0	0	114	61	0.536	SNP	6.1758
S3600-THY_vs_S3600-LIVER-resent	chr2	53464726	53464726	G	GTTCT	Arl6ip6-Rprm	n.53464726_53464727insTTCT	intergenic_region	MODIFIER	intergenic_region	18	0	0	40	19	0.488	INSERTION.NumRepetitions_10orMore.EventLength_4	3.75571
S3600-THY_vs_S3600-LIVER-resent	chr2	53645498	53645498	G	C	Arl6ip6-Rprm	n.53645498G>C	intergenic_region	MODIFIER	intergenic_region	57	0	0	107	53	0.491	SNP	5.90035
S3600-THY_vs_S3600-LIVER-resent	chr2	53832798	53832798	G	C	Arl6ip6-Rprm	n.53832798G>C	intergenic_region	MODIFIER	intergenic_region	47	0	0	103	40	0.388	SNP	6.19111
[truncated: 191,839 more rows]
